# Supplementary material for: Construction and validation of a three-microRNA signature as prognostic biomarker in patients with hepatocellular carcinoma
Source: PubMed Central journal article supplement (PMC7807177; doi:10.7150/ijms.49126), 2021-01-01
Supplement: ijmsv18p0984s1.pdf [file ijmsv18p0984s1.pdf]

Table S1. Differentially expressed mRNAs between hepatocellular carcinoma samples and norm

| id         | logFC        | logCPM       | PValue    | FDR       |
|------------|--------------|--------------|-----------|-----------|
| ADAMTS13   | -2.833207344 | 3.334405025  | 1.15E-129 | 2.56E-125 |
| STAB2      | -4.870650299 | 2.305374593  | 1.47E-113 | 1.64E-109 |
| OIT3       | -3.262127723 | 4.410218665  | 3.44E-113 | 2.57E-109 |
| KLHL30-AS1 | -7.265158998 | -0.701741025 | 2.55E-106 | 1.42E-102 |
| CFP        | -3.418713806 | 3.044824775  | 3.10E-95  | 1.39E-91  |
| ECM1       | -3.086527178 | 3.816488518  | 1.45E-94  | 5.41E-91  |
| BMPER      | -4.526397199 | 0.973575663  | 3.92E-91  | 1.25E-87  |
| CCL23      | -2.952799406 | -0.954369445 | 3.10E-90  | 8.68E-87  |
| ANGPTL6    | -2.982287311 | 2.453902659  | 9.27E-89  | 2.30E-85  |
| CSRNP1     | -2.250080147 | 5.294886342  | 4.77E-86  | 1.07E-82  |
| CLEC4G     | -5.413207123 | 3.406424078  | 3.15E-83  | 6.41E-80  |
| CRHBP      | -4.491933308 | 3.677574701  | 5.54E-79  | 1.03E-75  |
| RCAN1      | -2.402435306 | 6.072760912  | 9.34E-77  | 1.61E-73  |
| RND3       | -2.504751072 | 5.552944615  | 5.25E-76  | 8.38E-73  |
| PTH1R      | -3.256419562 | 2.508696952  | 1.20E-75  | 1.79E-72  |
| MARCO      | -4.874420498 | 3.961913955  | 3.75E-75  | 5.25E-72  |
| VIPR1      | -3.480629262 | 2.677165122  | 1.14E-74  | 1.50E-71  |
| NTF3       | -3.514934593 | 0.280446008  | 2.78E-73  | 3.46E-70  |
| FCN3       | -4.111636594 | 4.706777862  | 4.61E-73  | 5.43E-70  |
| FCN2       | -4.89769589  | 3.248707139  | 1.23E-72  | 1.38E-69  |
| MAP2K1     | -1.270179745 | 5.319579407  | 8.05E-71  | 8.58E-68  |
| GABRD      | 4.505903141  | 1.732527598  | 6.85E-70  | 6.96E-67  |
| LRAT       | -2.909145621 | 1.506527597  | 3.21E-68  | 3.12E-65  |
| ZFP36      | -2.162319752 | 7.231484262  | 1.03E-66  | 9.56E-64  |
| COLEC10    | -3.960302226 | 2.359672061  | 1.38E-66  | 1.23E-63  |
| NDST3      | -4.327716977 | -1.757923699 | 1.57E-65  | 1.35E-62  |
| DBH        | -3.207724149 | 3.169431722  | 1.76E-65  | 1.46E-62  |
| LIFR       | -2.833569571 | 4.128856592  | 6.18E-65  | 4.94E-62  |
| CETP       | -2.823607461 | 3.204268457  | 1.12E-64  | 8.63E-62  |
| PLVAP      | 2.914687883  | 6.459530208  | 1.22E-63  | 9.12E-61  |
| TRIB1      | -2.00351332  | 6.860251547  | 1.62E-62  | 1.17E-59  |
| FOS        | -3.10958211  | 6.900245909  | 9.37E-61  | 6.55E-58  |
| AADAT      | -2.794140341 | 3.584448019  | 7.91E-60  | 5.36E-57  |
| COL6A6     | -3.365140044 | -1.178008819 | 3.08E-59  | 2.03E-56  |
| EHD3       | -2.168964033 | 2.822626494  | 6.31E-59  | 4.03E-56  |
| EBF2       | 5.112343013  | 0.029766046  | 2.08E-58  | 1.29E-55  |
| CPEB3      | -2.259541094 | 3.866783087  | 2.30E-58  | 1.39E-55  |
| CLEC1B     | -5.231473106 | 1.599480629  | 2.65E-58  | 1.56E-55  |
| PZP        | -4.339437092 | 4.333728761  | 7.91E-58  | 4.54E-55  |
| C21orf91   | -1.693495338 | 2.808246857  | 2.08E-57  | 1.16E-54  |
| UBE2T      | 3.202818076  | 2.893945291  | 7.48E-57  | 4.08E-54  |
| CDC37L1    | -1.584928145 | 4.902992692  | 8.70E-57  | 4.63E-54  |
| PHLDA1     | -2.465253997 | 6.526229987  | 6.05E-56  | 3.15E-53  |
| ADRA2B     | -2.23560979  | 1.335785851  | 1.00E-55  | 5.11E-53  |
| C1RL       | -1.653099269 | 7.164358681  | 1.23E-55  | 6.10E-53  |
| DNASE1L3   | -2.911524873 | 4.754898205  | 5.31E-55  | 2.59E-52  |
| SLC26A6    | 2.642070157  | 4.338731715  | 6.94E-55  | 3.30E-52  |
| CDKN3      | 3.901529846  | 2.884650843  | 3.96E-54  | 1.85E-51  |
| ARHGEF39   | 2.934250836  | 2.126142692  | 5.90E-54  | 2.69E-51  |
| MXD3       | 2.672113318  | 3.115045806  | 2.95E-53  | 1.32E-50  |
| CXorf36    | 2.207948308  | 3.096506985  | 3.75E-53  | 1.64E-50  |
| TUBE1      | -1.813860819 | 3.518498971  | 1.22E-52  | 5.25E-50  |
| GPR182     | -3.397934343 | 0.511901649  | 1.43E-52  | 6.03E-50  |
| CDC25C     | 4.328877226  | 1.973177273  | 1.92E-52  | 7.87E-50  |
| CLEC4M     | -5.596890211 | 2.119280736  | 1.93E-52  | 7.87E-50  |
| PLSCR4     | -1.929454379 | 4.369865263  | 2.92E-52  | 1.17E-49  |

|         |              |              |          |          |
|---------|--------------|--------------|----------|----------|
| LYVE1   | -2.996162952 | 3.076923699  | 3.32E-52 | 1.30E-49 |
| ZFP1    | -1.70846279  | 2.968239752  | 4.17E-52 | 1.61E-49 |
| PVALB   | -3.663113767 | -1.588606444 | 9.78E-52 | 3.71E-49 |
| CXCL12  | -2.69515322  | 6.038771171  | 4.61E-51 | 1.72E-48 |
| EGR1    | -2.602009865 | 7.268588566  | 5.26E-51 | 1.93E-48 |
| EPHA2   | -2.10199353  | 4.87201391   | 6.42E-51 | 2.32E-48 |
| CDCA5   | 3.430879422  | 3.402449364  | 7.25E-51 | 2.57E-48 |
| ETS2    | -1.692222246 | 7.616584129  | 8.12E-51 | 2.84E-48 |
| CENPF   | 3.890427776  | 4.309616199  | 9.39E-51 | 3.23E-48 |
| HIGD1B  | 3.103577771  | -0.007476405 | 1.71E-50 | 5.79E-48 |
| NUF2    | 4.196180337  | 2.45023513   | 1.96E-50 | 6.54E-48 |
| DACH1   | -2.623416035 | -0.384173694 | 2.59E-50 | 8.54E-48 |
| TROAP   | 4.20571057   | 2.933063558  | 3.66E-50 | 1.19E-47 |
| SKA1    | 4.444214903  | 2.138499191  | 3.78E-50 | 1.21E-47 |
| KIFC1   | 3.763455194  | 3.674524847  | 7.34E-50 | 2.31E-47 |
| KCNN2   | -3.470205405 | 1.942981122  | 7.76E-50 | 2.41E-47 |
| ACADS   | -1.788870377 | 6.74431194   | 2.07E-49 | 6.34E-47 |
| BCO2    | -3.126095784 | 3.462702156  | 2.20E-49 | 6.64E-47 |
| FBXO43  | 4.002297253  | 0.272910594  | 2.23E-49 | 6.64E-47 |
| SPC24   | 3.469306426  | 3.279104056  | 3.52E-49 | 1.04E-46 |
| DUSP6   | -1.752497973 | 6.183282233  | 4.01E-49 | 1.16E-46 |
| HJURP   | 3.886927713  | 2.751061611  | 5.15E-49 | 1.48E-46 |
| TMEM26  | -2.204641262 | -0.119010578 | 5.41E-49 | 1.53E-46 |
| CCBE1   | -3.539055542 | 1.006994101  | 5.71E-49 | 1.60E-46 |
| PRC1    | 3.227716644  | 3.951464961  | 8.55E-49 | 2.36E-46 |
| KIF4A   | 3.911121104  | 3.220019859  | 1.60E-48 | 4.36E-46 |
| MELK    | 3.790950691  | 2.543055761  | 1.64E-48 | 4.41E-46 |
| CCNB2   | 3.722578322  | 3.083256723  | 1.70E-48 | 4.52E-46 |
| MCL1    | -1.265088077 | 8.351082955  | 2.48E-48 | 6.52E-46 |
| SPRY2   | -1.545435152 | 3.665805734  | 3.44E-48 | 8.95E-46 |
| NEK2    | 3.935290721  | 2.762918243  | 4.25E-48 | 1.09E-45 |
| CD4     | -1.96638461  | 5.804357359  | 4.38E-48 | 1.11E-45 |
| NRBF2   | -1.113897466 | 4.494600528  | 6.54E-48 | 1.65E-45 |
| LCAT    | -2.577900383 | 6.170762118  | 8.53E-48 | 2.12E-45 |
| CCNB1   | 3.268903819  | 4.18371021   | 1.01E-47 | 2.49E-45 |
| NDC80   | 3.307570204  | 2.71548371   | 1.11E-47 | 2.69E-45 |
| TCIM    | -2.266309163 | 5.560928457  | 1.17E-47 | 2.82E-45 |
| BIRC5   | 4.083148061  | 4.350888839  | 1.76E-47 | 4.18E-45 |
| TOMM40L | 1.725435431  | 4.884700557  | 2.09E-47 | 4.91E-45 |
| DCUN1D3 | -1.197761778 | 3.232282457  | 2.66E-47 | 6.19E-45 |
| IL1RAP  | -2.039431526 | 5.251851564  | 3.33E-47 | 7.67E-45 |
| COL15A1 | 3.792555351  | 4.351255537  | 3.97E-47 | 9.05E-45 |
| NCAPG   | 3.799833307  | 3.028462493  | 4.20E-47 | 9.43E-45 |
| TBXA2R  | -1.814139536 | 1.870404732  | 4.22E-47 | 9.43E-45 |
| EXO1    | 3.597602151  | 1.997866891  | 5.02E-47 | 1.11E-44 |
| KIF2C   | 3.927320027  | 3.068040898  | 1.09E-46 | 2.38E-44 |
| SFTA1P  | 5.580914249  | -1.812840263 | 1.24E-46 | 2.69E-44 |
| CD34    | 2.092795004  | 5.220298078  | 1.26E-46 | 2.71E-44 |
| FAM189B | 1.671325648  | 4.686305726  | 1.84E-46 | 3.92E-44 |
| ASPM    | 3.724380901  | 4.052493359  | 2.24E-46 | 4.72E-44 |
| BUB1    | 3.500437108  | 2.742916192  | 5.41E-46 | 1.13E-43 |
| CYP2C19 | -3.694587771 | 1.327288498  | 5.48E-46 | 1.14E-43 |
| PTTG1   | 3.719029618  | 3.836533948  | 9.07E-46 | 1.86E-43 |
| S100A12 | -2.975110641 | -1.906699315 | 1.29E-45 | 2.63E-43 |
| CDK1    | 3.486034406  | 3.65302642   | 1.38E-45 | 2.79E-43 |
| TIMD4   | -3.481505781 | 0.660887847  | 1.90E-45 | 3.80E-43 |
| EGR2    | -2.566513992 | 2.034900708  | 2.27E-45 | 4.49E-43 |
| KIF18B  | 4.029888876  | 2.396541228  | 2.95E-45 | 5.80E-43 |

|            |              |              |          |          |
|------------|--------------|--------------|----------|----------|
| CYP26A1    | -3.836614271 | 2.376722565  | 3.56E-45 | 6.89E-43 |
| DLGAP5     | 3.699291626  | 2.335593351  | 3.57E-45 | 6.89E-43 |
| FOSB       | -3.248962452 | 5.300903778  | 3.83E-45 | 7.33E-43 |
| KIF20A     | 3.711121242  | 3.101045683  | 4.11E-45 | 7.79E-43 |
| CDCA3      | 3.286763701  | 2.670586024  | 4.72E-45 | 8.88E-43 |
| CENPA      | 4.078243622  | 1.417957595  | 5.10E-45 | 9.50E-43 |
| GHR        | -2.470380115 | 6.204018834  | 5.33E-45 | 9.85E-43 |
| SGMS2      | -1.780408957 | 3.977123541  | 8.08E-45 | 1.48E-42 |
| EZH2       | 2.404516632  | 3.361885861  | 8.38E-45 | 1.52E-42 |
| RACGAP1    | 2.421285691  | 3.664460337  | 9.50E-45 | 1.71E-42 |
| PNRC1      | -1.45122583  | 6.640258987  | 1.03E-44 | 1.84E-42 |
| CDC20      | 4.262950453  | 3.97822584   | 1.05E-44 | 1.86E-42 |
| TOP2A      | 3.913729191  | 5.187779348  | 1.76E-44 | 3.10E-42 |
| VPS45      | 1.118735997  | 4.651054362  | 3.80E-44 | 6.62E-42 |
| IL1RL1     | -3.380638779 | 0.731543049  | 3.82E-44 | 6.62E-42 |
| CDCA8      | 3.16802918   | 2.830748877  | 4.51E-44 | 7.76E-42 |
| PKMYT1     | 3.155220961  | 2.368622177  | 7.90E-44 | 1.35E-41 |
| SKA3       | 3.539708316  | 1.854395224  | 8.31E-44 | 1.41E-41 |
| CENPL      | 2.374927475  | 1.910606015  | 1.70E-43 | 2.86E-41 |
| UBE2C      | 4.10218537   | 3.684436894  | 1.90E-43 | 3.17E-41 |
| ETFDH      | -1.672283823 | 5.922119093  | 1.91E-43 | 3.17E-41 |
| CDH13      | 2.340914464  | 3.004873796  | 2.68E-43 | 4.40E-41 |
| MSTO1      | 1.692095803  | 3.494776398  | 2.81E-43 | 4.58E-41 |
| MRO        | -2.340444406 | 1.529767015  | 2.92E-43 | 4.74E-41 |
| FOXM1      | 3.612486641  | 3.835480327  | 3.18E-43 | 5.12E-41 |
| AC092171.2 | 2.596432091  | 3.018486498  | 3.69E-43 | 5.90E-41 |
| HMMR       | 3.237924186  | 2.894353193  | 5.88E-43 | 9.33E-41 |
| TRAIP      | 2.802739882  | 1.696199647  | 6.05E-43 | 9.54E-41 |
| GPM6A      | -3.158324873 | 1.22592119   | 9.53E-43 | 1.49E-40 |
| EME1       | 3.228459906  | 1.020553577  | 1.09E-42 | 1.69E-40 |
| CHIC2      | -1.001041785 | 2.926909021  | 1.47E-42 | 2.27E-40 |
| ZIC2       | 6.646477117  | 2.271570847  | 1.50E-42 | 2.29E-40 |
| PLK1       | 3.542849123  | 3.261025635  | 1.81E-42 | 2.76E-40 |
| SPC25      | 3.128184847  | 1.436469893  | 1.92E-42 | 2.90E-40 |
| AL391845.2 | 4.093942997  | -2.291080989 | 2.54E-42 | 3.81E-40 |
| CEP131     | 1.798712232  | 3.647507439  | 2.84E-42 | 4.23E-40 |
| RNF152     | -1.799113613 | 5.192862629  | 9.09E-42 | 1.35E-39 |
| FLVCR1     | 2.199884371  | 3.679271456  | 9.73E-42 | 1.43E-39 |
| C5orf34    | 2.391828888  | 0.469468302  | 1.02E-41 | 1.49E-39 |
| SPATS2     | 1.571823604  | 3.851120567  | 1.05E-41 | 1.52E-39 |
| PLPP3      | -1.666360276 | 6.764789243  | 1.11E-41 | 1.60E-39 |
| KDM8       | -2.423715572 | 4.727775284  | 1.18E-41 | 1.69E-39 |
| AC008556.1 | -2.023342731 | -0.693758158 | 1.21E-41 | 1.72E-39 |
| AURKA      | 2.685523947  | 4.00485179   | 1.55E-41 | 2.20E-39 |
| TTK        | 3.774642984  | 2.126555887  | 2.18E-41 | 3.06E-39 |
| LILRA2     | -1.973237195 | 0.280182971  | 2.34E-41 | 3.27E-39 |
| SIGLEC11   | -2.353951186 | -0.025975551 | 2.91E-41 | 4.05E-39 |
| E2F1       | 3.673389864  | 4.151997679  | 3.23E-41 | 4.46E-39 |
| TRIP13     | 3.42303206   | 2.220491707  | 3.56E-41 | 4.89E-39 |
| NAAA       | -1.644548356 | 4.37571523   | 3.72E-41 | 5.07E-39 |
| RRM2       | 3.07827395   | 4.59933559   | 4.94E-41 | 6.70E-39 |
| TMEM120B   | 1.247105125  | 3.097097058  | 5.83E-41 | 7.86E-39 |
| ANLN       | 3.644674436  | 3.314285097  | 7.04E-41 | 9.43E-39 |
| LILRA5     | -2.168482207 | 0.615041902  | 7.95E-41 | 1.06E-38 |
| KIF19      | -2.420974263 | -0.883144607 | 1.02E-40 | 1.36E-38 |
| CDT1       | 3.402024147  | 3.417394398  | 1.34E-40 | 1.77E-38 |
| DTL        | 3.261776077  | 3.233781092  | 1.74E-40 | 2.27E-38 |
| GTSE1      | 3.532104115  | 2.129075582  | 1.76E-40 | 2.29E-38 |

|            |              |              |          |          |
|------------|--------------|--------------|----------|----------|
| SIGLEC7    | -2.049080275 | 0.527183715  | 1.77E-40 | 2.30E-38 |
| MAP2K3     | -1.273657703 | 5.892191331  | 1.87E-40 | 2.41E-38 |
| C21orf62   | -2.761158989 | -2.737507742 | 2.05E-40 | 2.62E-38 |
| CENPE      | 3.15180079   | 2.163073015  | 2.14E-40 | 2.72E-38 |
| FRMD4B     | -1.36124619  | 4.253059152  | 2.44E-40 | 3.08E-38 |
| AURKB      | 3.553329822  | 2.828915208  | 2.56E-40 | 3.22E-38 |
| MT2P1      | -3.24485258  | 1.034749418  | 2.78E-40 | 3.47E-38 |
| PLK3       | -1.618232442 | 2.976687675  | 3.30E-40 | 4.11E-38 |
| GSTZ1      | -2.029403457 | 5.658842136  | 3.46E-40 | 4.28E-38 |
| MKI67      | 3.359866257  | 4.723067222  | 4.40E-40 | 5.40E-38 |
| LRRC4      | -1.903800256 | -0.287900518 | 5.15E-40 | 6.29E-38 |
| TICRR      | 3.646089317  | 1.146884417  | 6.03E-40 | 7.29E-38 |
| BUB1B      | 3.515602218  | 2.388134904  | 6.03E-40 | 7.29E-38 |
| ZBTB21     | -1.43554486  | 3.756862392  | 6.07E-40 | 7.30E-38 |
| MYBL2      | 4.537449027  | 4.233700634  | 6.83E-40 | 8.18E-38 |
| CDC6       | 3.203270181  | 3.478980096  | 7.61E-40 | 9.05E-38 |
| LRRC14     | 1.497408677  | 4.623174493  | 9.87E-40 | 1.17E-37 |
| SERTAD1    | -1.576272993 | 4.100633372  | 1.06E-39 | 1.25E-37 |
| SLC38A2    | -1.631465862 | 7.894085372  | 1.11E-39 | 1.30E-37 |
| IQGAP3     | 3.408138251  | 3.879209751  | 1.64E-39 | 1.92E-37 |
| CD302      | -1.688208647 | 4.8367851    | 1.75E-39 | 2.03E-37 |
| CENPM      | 3.522665504  | 2.543379746  | 2.12E-39 | 2.44E-37 |
| APLN       | 3.90345323   | 2.857253535  | 2.53E-39 | 2.90E-37 |
| MND1       | 2.918969326  | 1.1567664    | 3.45E-39 | 3.94E-37 |
| CAPN10-DT  | 2.324225495  | 0.072703297  | 3.52E-39 | 3.98E-37 |
| ERLIN1     | -1.292235277 | 6.127518307  | 4.39E-39 | 4.93E-37 |
| ESM1       | 4.212404298  | 3.229090118  | 5.31E-39 | 5.94E-37 |
| AC007906.2 | -2.516928447 | -0.941951837 | 5.62E-39 | 6.25E-37 |
| CELSR3     | 3.492853434  | 2.557649963  | 5.70E-39 | 6.31E-37 |
| CYR61      | -2.009858989 | 5.934157091  | 6.48E-39 | 7.13E-37 |
| SLC39A14   | -1.649719722 | 8.469564161  | 6.50E-39 | 7.13E-37 |
| SPDL1      | 1.808074984  | 2.506377624  | 9.59E-39 | 1.05E-36 |
| RASGEF1B   | -1.846377257 | 4.385809655  | 9.94E-39 | 1.08E-36 |
| NCAPH      | 2.971508428  | 2.291962476  | 1.08E-38 | 1.16E-36 |
| ADRA1A     | -3.121654017 | 3.344723745  | 1.16E-38 | 1.24E-36 |
| CDKN2A     | 4.032562376  | 3.764997736  | 1.41E-38 | 1.51E-36 |
| PARPBP     | 2.716478425  | 1.522373127  | 1.43E-38 | 1.52E-36 |
| ADGRG7     | -2.68074622  | 2.423419496  | 1.70E-38 | 1.80E-36 |
| CDC45      | 3.068149753  | 2.361189612  | 1.81E-38 | 1.91E-36 |
| NOX4       | 2.825702746  | 0.298061527  | 1.94E-38 | 2.03E-36 |
| LRRC55     | -2.775485962 | -0.949693641 | 1.97E-38 | 2.06E-36 |
| ZC2HC1C    | -1.416607241 | 1.985250871  | 2.08E-38 | 2.16E-36 |
| FOXO1      | -1.712197888 | 4.989559781  | 2.61E-38 | 2.70E-36 |
| C1R        | -1.782579433 | 10.34940988  | 2.98E-38 | 3.07E-36 |
| CENPI      | 3.091751036  | 0.858345143  | 4.15E-38 | 4.26E-36 |
| THY1       | 2.53572187   | 5.418816626  | 5.00E-38 | 5.11E-36 |
| NEIL3      | 4.122296446  | 0.692649064  | 5.74E-38 | 5.83E-36 |
| THBS4      | 5.771614626  | 4.10871723   | 6.10E-38 | 6.17E-36 |
| MYD88      | -1.043442216 | 5.528660324  | 6.78E-38 | 6.83E-36 |
| MPC1       | -1.540706654 | 6.392926294  | 7.13E-38 | 7.16E-36 |
| DEPDC1     | 3.762327638  | 2.112302471  | 7.30E-38 | 7.29E-36 |
| TBC1D16    | 1.703701409  | 5.287227345  | 7.36E-38 | 7.31E-36 |
| SOCS3      | -2.332909981 | 5.533623258  | 8.63E-38 | 8.54E-36 |
| IGFBP3     | -1.99656871  | 7.731067634  | 8.86E-38 | 8.74E-36 |
| PANK1      | -1.577153299 | 5.667277703  | 9.85E-38 | 9.67E-36 |
| IL1RN      | -2.149000338 | 6.048257843  | 1.01E-37 | 9.90E-36 |
| TARBP1     | 1.794645449  | 4.734330055  | 1.13E-37 | 1.10E-35 |
| PYGO2      | 1.214451335  | 5.519285322  | 1.29E-37 | 1.25E-35 |

|            |              |              |          |          |
|------------|--------------|--------------|----------|----------|
| CKAP2L     | 3.195682406  | 2.035249198  | 1.38E-37 | 1.33E-35 |
| KIF23      | 3.297405629  | 2.449134911  | 1.56E-37 | 1.50E-35 |
| LILRB5     | -1.94571476  | 2.828138295  | 1.84E-37 | 1.76E-35 |
| KIF14      | 3.104393206  | 1.959205903  | 1.85E-37 | 1.76E-35 |
| TTC13      | 1.405753242  | 3.756515271  | 2.07E-37 | 1.96E-35 |
| ERCC6L     | 3.184322599  | 0.410626112  | 2.12E-37 | 2.01E-35 |
| TCF19      | 2.785270507  | 3.947651192  | 2.24E-37 | 2.10E-35 |
| JRK        | 1.754733319  | 2.918144579  | 2.40E-37 | 2.25E-35 |
| DSCC1      | 2.063267864  | 1.741907694  | 2.67E-37 | 2.49E-35 |
| ZNF692     | 1.682206122  | 4.175412721  | 3.20E-37 | 2.96E-35 |
| AC132192.2 | 2.39022501   | -0.092531594 | 3.23E-37 | 2.98E-35 |
| PBK        | 3.398155712  | 2.329374404  | 3.41E-37 | 3.13E-35 |
| IGFALS     | -3.195526355 | 5.589512723  | 3.44E-37 | 3.14E-35 |
| MT1XP1     | -3.10776891  | -0.77682528  | 4.13E-37 | 3.76E-35 |
| IER2       | -1.3450004   | 6.059528732  | 4.60E-37 | 4.16E-35 |
| SGO1       | 3.047773774  | 1.351579413  | 5.34E-37 | 4.82E-35 |
| SOCS2      | -2.179850483 | 4.447551088  | 6.08E-37 | 5.46E-35 |
| APOF       | -2.8720168   | 6.772005714  | 6.90E-37 | 6.18E-35 |
| KLHL15     | -1.351799272 | 3.620385931  | 7.09E-37 | 6.32E-35 |
| KIF18A     | 3.341573296  | 1.180179653  | 8.92E-37 | 7.92E-35 |
| TONSL      | 1.924072183  | 3.765286997  | 1.36E-36 | 1.20E-34 |
| MS4A6A     | -1.831008537 | 4.564168599  | 1.66E-36 | 1.46E-34 |
| ASF1B      | 2.977289977  | 2.983303588  | 2.09E-36 | 1.83E-34 |
| DIRAS3     | -2.84601366  | 1.03852694   | 2.80E-36 | 2.45E-34 |
| GMNN       | 2.187673837  | 5.072569252  | 2.92E-36 | 2.54E-34 |
| ID2        | -1.456356264 | 7.33272645   | 2.93E-36 | 2.54E-34 |
| ALDH2      | -1.674502183 | 9.779518157  | 3.20E-36 | 2.77E-34 |
| AC004477.1 | 2.765856846  | -0.853993301 | 3.26E-36 | 2.80E-34 |
| LRRN3      | -2.604735049 | -1.193476534 | 3.46E-36 | 2.96E-34 |
| ITGA9      | -1.848708896 | 3.715722221  | 5.74E-36 | 4.90E-34 |
| N4BP2L1    | -1.448102897 | 4.66407139   | 5.88E-36 | 5.00E-34 |
| GADD45B    | -1.945354867 | 7.236468921  | 5.90E-36 | 5.00E-34 |
| UCK2       | 1.643730532  | 4.773020752  | 6.33E-36 | 5.34E-34 |
| GPC3       | 5.923086944  | 9.190017452  | 9.90E-36 | 8.33E-34 |
| KAT2A      | 1.485961729  | 5.569488446  | 1.33E-35 | 1.11E-33 |
| CCNF       | 2.180701617  | 2.860595901  | 1.42E-35 | 1.19E-33 |
| ZFP41      | 1.923813481  | 3.17420154   | 1.79E-35 | 1.49E-33 |
| ACADSB     | -1.752197885 | 7.977199966  | 1.79E-35 | 1.49E-33 |
| CD163      | -1.995811399 | 5.049792217  | 1.87E-35 | 1.54E-33 |
| FANCI      | 2.267942568  | 3.428349795  | 2.38E-35 | 1.96E-33 |
| MTFR2      | 2.999241571  | 0.450123663  | 2.53E-35 | 2.07E-33 |
| FPR2       | -2.786272122 | -1.416331021 | 2.70E-35 | 2.21E-33 |
| E2F8       | 3.662634387  | 1.537416746  | 2.87E-35 | 2.33E-33 |
| ORC1       | 2.913135139  | 1.745071046  | 3.03E-35 | 2.46E-33 |
| NDRG2      | -1.500175714 | 7.646350147  | 3.24E-35 | 2.61E-33 |
| CCNA2      | 3.507763789  | 3.488607344  | 3.46E-35 | 2.78E-33 |
| ANKRD52    | 1.426309336  | 4.778314201  | 4.32E-35 | 3.47E-33 |
| OR51E1     | 3.012692039  | -0.959363709 | 4.65E-35 | 3.71E-33 |
| SOCS6      | -1.071410012 | 4.794980083  | 4.66E-35 | 3.71E-33 |
| RECQL4     | 2.667813205  | 4.182892091  | 5.01E-35 | 3.96E-33 |
| SHCBP1     | 3.318245689  | 1.750416291  | 5.01E-35 | 3.96E-33 |
| TEDC2      | 2.765751046  | 2.064848054  | 5.56E-35 | 4.38E-33 |
| CDKN2B-AS1 | 3.5787177    | -0.487369081 | 5.58E-35 | 4.38E-33 |
| CCDC71L    | -1.765672139 | 4.725484141  | 5.85E-35 | 4.58E-33 |
| NXF3       | -2.952296313 | -1.70664579  | 6.33E-35 | 4.94E-33 |
| RASD2      | 2.62848314   | 0.338841818  | 6.53E-35 | 5.07E-33 |
| SLC35D1    | -1.356411251 | 6.246536313  | 6.70E-35 | 5.19E-33 |
| DDX11-AS1  | 2.786618572  | -1.23352923  | 6.82E-35 | 5.26E-33 |

|            |              |              |          |          |
|------------|--------------|--------------|----------|----------|
| ARHGAP11A  | 2.543160339  | 2.793979067  | 6.86E-35 | 5.28E-33 |
| PXDC1      | -1.337875979 | 6.770272209  | 7.86E-35 | 6.03E-33 |
| ZWINT      | 2.46189527   | 3.851004249  | 8.32E-35 | 6.36E-33 |
| CCL14      | -1.890014499 | 1.801242566  | 8.77E-35 | 6.68E-33 |
| KIF15      | 3.358356865  | 1.6437308    | 9.22E-35 | 6.99E-33 |
| XRCC2      | 2.892989914  | 1.065032173  | 9.30E-35 | 7.03E-33 |
| BMP10      | -4.929830589 | -1.97289127  | 9.97E-35 | 7.51E-33 |
| LINC01093  | -3.39504491  | 2.916090518  | 1.09E-34 | 8.17E-33 |
| STIL       | 2.384359636  | 1.939603425  | 1.31E-34 | 9.78E-33 |
| ASS1P2     | -3.440355338 | -0.564375575 | 1.54E-34 | 1.15E-32 |
| C21orf58   | 2.279061336  | 1.77298165   | 1.93E-34 | 1.43E-32 |
| OLFML2B    | 3.161287378  | 3.108665788  | 2.36E-34 | 1.75E-32 |
| CENPW      | 2.575095447  | 2.380395015  | 2.60E-34 | 1.91E-32 |
| INMT       | -2.484148596 | 3.611993241  | 2.63E-34 | 1.93E-32 |
| ZFP36L1    | -1.107838502 | 7.792708559  | 2.78E-34 | 2.04E-32 |
| XRCC3      | 1.631402584  | 2.706546377  | 2.80E-34 | 2.04E-32 |
| ACAA1      | -1.534208056 | 7.765507669  | 2.96E-34 | 2.15E-32 |
| MT-ATP6    | -1.405559769 | 12.38635673  | 3.34E-34 | 2.42E-32 |
| TNFRSF4    | 2.318766142  | 1.642037676  | 3.61E-34 | 2.61E-32 |
| RFC4       | 1.730937752  | 3.738236344  | 3.88E-34 | 2.79E-32 |
| SERPINB9   | -1.604977628 | 3.624434587  | 4.15E-34 | 2.98E-32 |
| ORC6       | 2.843257744  | 1.460186018  | 4.29E-34 | 3.06E-32 |
| RNASEH2A   | 1.870093048  | 4.122494239  | 4.59E-34 | 3.27E-32 |
| AGL        | -1.496336384 | 5.228215308  | 5.47E-34 | 3.88E-32 |
| SGO2       | 2.386058307  | 1.882552836  | 6.36E-34 | 4.51E-32 |
| STMN1      | 2.109406321  | 6.037641045  | 7.17E-34 | 5.06E-32 |
| CXCL14     | -3.59864496  | 3.038782779  | 7.41E-34 | 5.22E-32 |
| EHMT2      | 1.312882554  | 5.529153641  | 8.12E-34 | 5.70E-32 |
| ZADH2      | -1.054639332 | 4.555126409  | 8.55E-34 | 5.98E-32 |
| USP21      | 1.164067827  | 3.767443001  | 8.69E-34 | 6.06E-32 |
| CYP2C8     | -2.678227447 | 8.759419192  | 9.32E-34 | 6.47E-32 |
| E2F2       | 2.983501569  | 1.220639119  | 1.05E-33 | 7.29E-32 |
| HAGLROS    | 4.815882957  | -2.142635193 | 1.19E-33 | 8.24E-32 |
| AF165147.1 | -2.436384524 | -1.914513082 | 1.26E-33 | 8.65E-32 |
| ABCC10     | 1.358024133  | 3.602995249  | 1.40E-33 | 9.64E-32 |
| BCKDHB     | -1.510453501 | 4.991003382  | 1.42E-33 | 9.72E-32 |
| WDR62      | 2.541659567  | 2.552200928  | 1.46E-33 | 9.92E-32 |
| ZNF330     | -1.012322508 | 4.422000942  | 1.46E-33 | 9.92E-32 |
| CBFA2T3    | -1.971248924 | 1.908583896  | 1.47E-33 | 9.95E-32 |
| ZKSCAN2-DT | 1.946032292  | -0.01948757  | 1.92E-33 | 1.29E-31 |
| FATE1      | 4.394118865  | -1.259304399 | 1.92E-33 | 1.29E-31 |
| GNE        | -1.567875675 | 6.394413564  | 2.04E-33 | 1.37E-31 |
| SMG5       | 1.338332328  | 6.917418078  | 2.58E-33 | 1.73E-31 |
| DHODH      | -1.775170852 | 5.935098225  | 3.05E-33 | 2.04E-31 |
| MTHFD2L    | -1.413669652 | 3.030855582  | 3.12E-33 | 2.07E-31 |
| GIN51      | 2.728122389  | 2.897911258  | 3.90E-33 | 2.59E-31 |
| POLQ       | 2.986329968  | 1.281303628  | 5.25E-33 | 3.47E-31 |
| FXN        | -1.197865996 | 3.66527936   | 5.35E-33 | 3.53E-31 |
| MDK        | 3.798011257  | 7.152482736  | 6.03E-33 | 3.96E-31 |
| JUN        | -1.553173437 | 7.297780018  | 6.67E-33 | 4.36E-31 |
| LDLR       | -1.508544947 | 6.708087357  | 7.95E-33 | 5.18E-31 |
| FENDRR     | -2.791304915 | -1.706755631 | 8.11E-33 | 5.27E-31 |
| AC134043.2 | 3.932154798  | -1.323846209 | 8.86E-33 | 5.73E-31 |
| NCOR1      | -1.143034388 | 5.797555564  | 9.28E-33 | 5.98E-31 |
| FAHD2A     | -1.154836256 | 5.002704377  | 9.73E-33 | 6.26E-31 |
| NR4A1      | -2.164417576 | 4.986941066  | 1.15E-32 | 7.39E-31 |
| RASL12     | 2.215611013  | 1.595518588  | 1.21E-32 | 7.74E-31 |
| FEN1       | 1.623539054  | 4.654987429  | 1.23E-32 | 7.85E-31 |

|            |              |              |          |          |
|------------|--------------|--------------|----------|----------|
| OLFML2A    | 2.400266291  | 3.189914981  | 1.33E-32 | 8.44E-31 |
| KMT5C      | 1.490977315  | 2.906764085  | 1.42E-32 | 9.00E-31 |
| LILRA1     | -1.735687116 | -0.49649095  | 1.42E-32 | 9.00E-31 |
| AP5Z1      | 1.115615207  | 5.025178593  | 1.49E-32 | 9.36E-31 |
| AC010719.1 | 2.829187521  | 0.380467232  | 1.50E-32 | 9.42E-31 |
| P2RY13     | -1.935456177 | 1.122933597  | 1.52E-32 | 9.53E-31 |
| TBC1D31    | 1.383433632  | 2.388162246  | 1.54E-32 | 9.60E-31 |
| NFIL3      | -1.428051738 | 5.586983447  | 1.66E-32 | 1.03E-30 |
| JUNB       | -1.554062947 | 6.744910315  | 1.84E-32 | 1.15E-30 |
| NUSAP1     | 2.263651832  | 4.252972276  | 2.51E-32 | 1.56E-30 |
| HDAC11     | 1.74473613   | 4.342518727  | 2.75E-32 | 1.70E-30 |
| AC138356.1 | -2.301312491 | -0.359527519 | 3.32E-32 | 2.05E-30 |
| HOXA13     | 6.937204854  | 2.470393595  | 3.40E-32 | 2.09E-30 |
| FAM83D     | 2.399008353  | 3.384503576  | 3.60E-32 | 2.21E-30 |
| RAD54L     | 3.352040383  | 1.0671116    | 3.98E-32 | 2.43E-30 |
| AC092119.2 | 2.402662006  | -1.136196927 | 4.11E-32 | 2.51E-30 |
| HIST2H2BC  | 2.133456674  | 2.327370785  | 4.67E-32 | 2.84E-30 |
| CENPH      | 1.851118716  | 1.915795325  | 4.72E-32 | 2.86E-30 |
| CDCA2      | 3.180552239  | 1.053990968  | 4.98E-32 | 3.00E-30 |
| UHRF1      | 3.232967589  | 2.386845889  | 4.99E-32 | 3.00E-30 |
| PLXDC1     | 2.97211641   | 2.720433524  | 5.64E-32 | 3.38E-30 |
| CDKN2C     | 2.30581737   | 3.953270064  | 6.00E-32 | 3.59E-30 |
| ANKRD55    | -2.258920241 | -0.387257192 | 6.03E-32 | 3.60E-30 |
| SCAMP3     | 1.270561352  | 6.542349544  | 6.70E-32 | 3.99E-30 |
| COX4I2     | 2.845311189  | 0.904677101  | 6.92E-32 | 4.10E-30 |
| CEP250     | 1.084144664  | 4.42762511   | 6.93E-32 | 4.10E-30 |
| RNF125     | -1.879660019 | 3.606281738  | 7.01E-32 | 4.14E-30 |
| NAT2       | -2.944171574 | 3.5478492    | 7.72E-32 | 4.55E-30 |
| PCLAF      | 2.464813962  | 2.95735616   | 7.88E-32 | 4.63E-30 |
| TMEM206    | 1.32821613   | 1.930606785  | 9.31E-32 | 5.44E-30 |
| PTGS2      | -2.460660848 | 0.50749681   | 9.93E-32 | 5.78E-30 |
| CENPK      | 2.639359395  | 1.201804346  | 1.13E-31 | 6.58E-30 |
| P2RY12     | -2.417567448 | -1.454995733 | 1.14E-31 | 6.63E-30 |
| NR2C2AP    | 1.318925484  | 3.871472486  | 1.21E-31 | 7.00E-30 |
| ACAA2      | -1.589878561 | 8.351972217  | 1.55E-31 | 8.93E-30 |
| SLCO1C1    | 3.942202759  | -1.821796758 | 1.65E-31 | 9.51E-30 |
| ATF3       | -1.750028706 | 5.47528364   | 1.67E-31 | 9.59E-30 |
| HPS5       | -1.524173701 | 5.043252251  | 1.82E-31 | 1.04E-29 |
| EGR3       | -2.147016417 | 0.675923716  | 1.98E-31 | 1.13E-29 |
| HAGLR      | 6.211087784  | 2.403614355  | 2.04E-31 | 1.16E-29 |
| TERT       | 8.677196916  | 2.464243848  | 2.13E-31 | 1.21E-29 |
| PIF1       | 2.737265427  | 1.272561389  | 2.20E-31 | 1.25E-29 |
| KIAA1841   | 1.543561428  | 1.845836697  | 2.33E-31 | 1.32E-29 |
| LINC00907  | -2.893953156 | -1.309924142 | 2.38E-31 | 1.34E-29 |
| CEP55      | 3.046907861  | 1.765824894  | 2.64E-31 | 1.49E-29 |
| FAM72D     | 3.538574261  | -1.412730763 | 2.69E-31 | 1.51E-29 |
| SYNE1      | -1.307546409 | 4.552642203  | 3.23E-31 | 1.81E-29 |
| SEMA5B     | 2.297139757  | 1.961257774  | 4.04E-31 | 2.25E-29 |
| MTBP       | 1.859581396  | 1.158117977  | 4.46E-31 | 2.48E-29 |
| DNAJC25    | -1.252424607 | 4.371505903  | 5.42E-31 | 3.01E-29 |
| DBF4B      | 1.558200046  | 2.003857242  | 6.04E-31 | 3.34E-29 |
| RIPK4      | -1.384649355 | 4.562949329  | 6.10E-31 | 3.36E-29 |
| KCTD9P4    | -2.928040496 | -2.657125445 | 6.10E-31 | 3.36E-29 |
| FERMT2     | -1.078692569 | 5.743424446  | 6.87E-31 | 3.78E-29 |
| ACSM3      | -2.03882602  | 4.991843993  | 6.93E-31 | 3.80E-29 |
| PTP4A2P2   | 2.818364215  | -2.637626566 | 6.94E-31 | 3.80E-29 |
| KHDC4      | 1.299366631  | 4.519222628  | 6.97E-31 | 3.80E-29 |
| E2F7       | 3.484654721  | 0.74600369   | 7.30E-31 | 3.98E-29 |

|            |              |              |          |          |
|------------|--------------|--------------|----------|----------|
| PPOX       | 1.15500702   | 4.055619626  | 7.69E-31 | 4.18E-29 |
| TACC3      | 2.10596896   | 4.579944535  | 8.20E-31 | 4.44E-29 |
| USP49      | 1.269855149  | 1.938355108  | 8.48E-31 | 4.58E-29 |
| SEMA3F     | 1.27207077   | 4.195340573  | 8.64E-31 | 4.66E-29 |
| AL359715.3 | -1.551457381 | 0.24907575   | 9.07E-31 | 4.88E-29 |
| RDM1       | 3.424687445  | -0.361943005 | 9.12E-31 | 4.89E-29 |
| NMRAL2P    | 5.991208536  | 2.277794588  | 9.45E-31 | 5.06E-29 |
| SPRYD4     | -1.31686107  | 5.914215743  | 9.99E-31 | 5.32E-29 |
| ACAT1      | -1.399133777 | 8.276099948  | 1.01E-30 | 5.38E-29 |
| MMAA       | -1.181607931 | 4.176530055  | 1.10E-30 | 5.81E-29 |
| MBNL2      | -1.374821087 | 5.766586745  | 1.10E-30 | 5.82E-29 |
| FANCD2     | 2.205647689  | 2.683451438  | 1.14E-30 | 6.03E-29 |
| AL606489.1 | 3.076935989  | -1.54391163  | 1.18E-30 | 6.23E-29 |
| MESP2      | 3.359132286  | 0.214808969  | 1.19E-30 | 6.24E-29 |
| OTX1       | 4.363341241  | 0.191845979  | 1.25E-30 | 6.53E-29 |
| IVD        | -1.214853319 | 7.383613731  | 1.27E-30 | 6.64E-29 |
| LARP1B     | -1.102185188 | 4.734590916  | 1.29E-30 | 6.75E-29 |
| MCM10      | 3.032036263  | 1.699862372  | 1.39E-30 | 7.24E-29 |
| PEA15      | 1.167783941  | 6.651726068  | 1.56E-30 | 8.12E-29 |
| TK1        | 2.326590173  | 4.919286382  | 1.63E-30 | 8.43E-29 |
| MCM2       | 2.392992551  | 4.813353308  | 1.64E-30 | 8.49E-29 |
| EPHB1      | -2.061646804 | 0.046912319  | 1.84E-30 | 9.47E-29 |
| ECT2       | 2.397862478  | 3.458413293  | 1.89E-30 | 9.71E-29 |
| C1orf35    | 1.298818541  | 4.087829324  | 1.92E-30 | 9.87E-29 |
| GJC1       | 2.350237592  | 1.990541988  | 2.02E-30 | 1.03E-28 |
| MSH2       | 1.292211335  | 3.842356454  | 2.23E-30 | 1.14E-28 |
| DENND4B    | 1.04974288   | 5.029267707  | 2.26E-30 | 1.15E-28 |
| NPY1R      | -2.393552916 | 1.840758114  | 2.63E-30 | 1.34E-28 |
| DIAPH3     | 3.687524988  | 1.878187771  | 3.41E-30 | 1.73E-28 |
| MAD2L1     | 2.169689247  | 2.80273169   | 3.73E-30 | 1.89E-28 |
| MMP11      | 3.776793493  | 3.938812741  | 3.87E-30 | 1.95E-28 |
| SCX        | 3.236499478  | -0.108994271 | 4.47E-30 | 2.25E-28 |
| CAP2       | 2.285302338  | 4.729029072  | 4.74E-30 | 2.38E-28 |
| CHAF1A     | 1.461349795  | 3.887962779  | 4.97E-30 | 2.49E-28 |
| PGM1       | -1.245074743 | 7.45806952   | 5.11E-30 | 2.55E-28 |
| HAMP       | -3.615381632 | 6.989144009  | 5.14E-30 | 2.56E-28 |
| ZNF517     | 1.72518026   | 3.794098931  | 5.32E-30 | 2.64E-28 |
| NDUFA4L2   | 2.849782012  | 4.558946405  | 6.04E-30 | 3.00E-28 |
| 4-Mar      | 3.649548373  | -2.290102143 | 6.54E-30 | 3.23E-28 |
| MSRA       | -1.393721208 | 4.898427607  | 6.54E-30 | 3.23E-28 |
| MUT        | -1.332490413 | 6.890556229  | 6.84E-30 | 3.37E-28 |
| CYP2B6     | -2.626474612 | 7.44782409   | 7.23E-30 | 3.56E-28 |
| MCM6       | 1.738102391  | 4.729678527  | 7.40E-30 | 3.63E-28 |
| RAD51      | 2.320847702  | 1.496064537  | 7.46E-30 | 3.65E-28 |
| CHTF18     | 1.700452145  | 3.167118068  | 7.82E-30 | 3.81E-28 |
| KIF11      | 2.201384545  | 2.826904768  | 7.82E-30 | 3.81E-28 |
| PIGC       | 1.06092064   | 4.819086978  | 7.86E-30 | 3.82E-28 |
| SDC4       | -1.287025213 | 8.690513995  | 8.28E-30 | 4.02E-28 |
| CDH24      | 2.181393864  | 1.539126655  | 8.84E-30 | 4.28E-28 |
| ANTXR2     | -1.26242288  | 4.907048995  | 9.13E-30 | 4.41E-28 |
| IQCC       | 1.477067717  | 0.889612858  | 9.25E-30 | 4.46E-28 |
| DHX34      | 1.145250694  | 4.384013611  | 1.04E-29 | 5.00E-28 |
| KLF10      | -1.446993983 | 5.753837381  | 1.08E-29 | 5.18E-28 |
| MAT1A      | -1.808594934 | 9.961287836  | 1.10E-29 | 5.27E-28 |
| ALDH6A1    | -1.744896512 | 7.910229895  | 1.12E-29 | 5.34E-28 |
| SNHG1      | 1.584892113  | 4.167391133  | 1.15E-29 | 5.49E-28 |
| CHRM2      | -3.781975935 | -1.659556974 | 1.16E-29 | 5.53E-28 |
| TRIM11     | 1.119071395  | 4.219593851  | 1.19E-29 | 5.66E-28 |



|            |              |              |          |          |
|------------|--------------|--------------|----------|----------|
| PBLD       | -1.761552993 | 6.738951733  | 1.20E-29 | 5.67E-28 |
| AC005332.5 | 1.598902648  | 1.990807773  | 1.37E-29 | 6.46E-28 |
| CBFA2T2    | 1.188396429  | 3.993565719  | 1.42E-29 | 6.72E-28 |
| LPA        | -2.340531195 | 5.13468301   | 1.44E-29 | 6.78E-28 |
| ACSL1      | -1.825483494 | 9.282509424  | 1.52E-29 | 7.11E-28 |
| CSPG4      | 2.115277721  | 3.31835508   | 1.56E-29 | 7.30E-28 |
| RUSC1      | 1.376234529  | 4.242903051  | 1.73E-29 | 8.10E-28 |
| TMEM79     | 1.092901933  | 2.503112853  | 1.83E-29 | 8.55E-28 |
| AL162431.2 | 2.360184934  | -0.556422777 | 1.94E-29 | 9.01E-28 |
| CAT        | -1.425216055 | 8.579994649  | 2.01E-29 | 9.34E-28 |
| CYP4A11    | -2.239439019 | 8.690138961  | 2.06E-29 | 9.52E-28 |
| SERPINE1   | -2.218331342 | 7.51788261   | 2.07E-29 | 9.58E-28 |
| C17orf82   | 2.96079973   | -0.821836088 | 2.14E-29 | 9.88E-28 |
| CLTRN      | -2.45922944  | 2.795627021  | 2.22E-29 | 1.02E-27 |
| HOTTIP     | 7.195629067  | 0.397647083  | 2.32E-29 | 1.06E-27 |
| NAT1       | -1.295973342 | 2.291120039  | 2.50E-29 | 1.14E-27 |
| AL353708.3 | 2.447681179  | -1.450912162 | 2.62E-29 | 1.20E-27 |
| TIGD5      | 1.582048753  | 3.567896489  | 2.64E-29 | 1.20E-27 |
| FANCG      | 1.464136939  | 3.135876921  | 2.70E-29 | 1.22E-27 |
| TRIM45     | 2.274292146  | 1.780074624  | 3.14E-29 | 1.42E-27 |
| PDLIM5     | -1.082749185 | 6.360045129  | 3.27E-29 | 1.47E-27 |
| PRIM2      | 1.166183349  | 2.824334844  | 3.54E-29 | 1.59E-27 |
| NR4A3      | -2.217160034 | 2.19911881   | 3.58E-29 | 1.61E-27 |
| MCM3       | 1.53691446   | 5.918883416  | 4.52E-29 | 2.03E-27 |
| HASPIN     | 2.716052245  | -0.471983251 | 4.98E-29 | 2.23E-27 |
| AC092171.4 | 2.496250975  | -1.852697399 | 5.00E-29 | 2.23E-27 |
| IRF8       | -1.574263731 | 4.112395407  | 5.14E-29 | 2.29E-27 |
| PITPNM3    | -2.532336034 | 0.734138791  | 5.40E-29 | 2.40E-27 |
| CD5L       | -3.035829803 | 4.380442327  | 5.56E-29 | 2.47E-27 |
| CAPN11     | 2.076562762  | -0.811999771 | 5.75E-29 | 2.55E-27 |
| TAPT1      | -1.024899793 | 5.025582939  | 5.76E-29 | 2.55E-27 |
| DDX12P     | 2.017429529  | 0.383149333  | 6.02E-29 | 2.65E-27 |
| SOCS7      | 1.516527763  | 2.989441206  | 6.71E-29 | 2.94E-27 |
| UBAP2L     | 1.001863222  | 6.543734189  | 6.84E-29 | 2.99E-27 |
| CHAF1B     | 2.573559872  | 2.443693408  | 6.93E-29 | 3.02E-27 |
| SCIMP      | -1.672395558 | 1.390835115  | 7.21E-29 | 3.14E-27 |
| MLYCD      | -1.265494691 | 4.835919939  | 7.31E-29 | 3.17E-27 |
| GNPNAT1    | -1.0907947   | 5.343085215  | 8.13E-29 | 3.52E-27 |
| DDX39A     | 1.457722259  | 5.596522456  | 8.34E-29 | 3.60E-27 |
| TGM3       | 5.350216022  | 4.124414147  | 8.48E-29 | 3.66E-27 |
| KLRF1      | -1.80704542  | -1.295289376 | 1.00E-28 | 4.30E-27 |
| GNA14      | -1.774675897 | 1.233206192  | 1.01E-28 | 4.31E-27 |
| SOWAHC     | -1.173738073 | 5.299602453  | 1.06E-28 | 4.52E-27 |
| MT-ND4     | -1.296298794 | 13.74235466  | 1.09E-28 | 4.65E-27 |
| MAPT       | 2.990782888  | 2.723504866  | 1.12E-28 | 4.78E-27 |
| RFX8       | 2.735683171  | -1.253663795 | 1.25E-28 | 5.30E-27 |
| CENPU      | 2.190429889  | 3.063420128  | 1.33E-28 | 5.63E-27 |
| LINC01089  | 1.677509981  | 2.092828614  | 1.36E-28 | 5.76E-27 |
| CNDP1      | -3.274317985 | 3.934041304  | 1.37E-28 | 5.79E-27 |
| MSTO2P     | 1.962143048  | 0.446721476  | 1.44E-28 | 6.08E-27 |
| CPED1      | -2.015230152 | 3.966661567  | 1.46E-28 | 6.13E-27 |
| PRR11      | 2.493029005  | 2.369145189  | 1.50E-28 | 6.28E-27 |
| DBT        | -1.10384465  | 5.114350653  | 1.65E-28 | 6.91E-27 |
| CAMK4      | -1.727822425 | 0.496742537  | 1.66E-28 | 6.94E-27 |
| MASP1      | -1.60291241  | 6.946312904  | 1.67E-28 | 6.95E-27 |
| ADCY6      | 1.172163998  | 4.726836831  | 1.76E-28 | 7.31E-27 |
| GDF2       | -4.785652483 | 1.496209684  | 2.07E-28 | 8.56E-27 |
| SIX1       | 4.841789383  | 0.045215884  | 2.15E-28 | 8.87E-27 |

|            |              |              |          |          |
|------------|--------------|--------------|----------|----------|
| CAD        | 1.272153659  | 4.843325393  | 2.27E-28 | 9.37E-27 |
| SCGB3A1    | -2.195086531 | -0.957017619 | 2.30E-28 | 9.49E-27 |
| FITM1      | -2.075781878 | 1.351384656  | 2.32E-28 | 9.54E-27 |
| CMTM6      | -1.034721505 | 6.337216693  | 2.38E-28 | 9.77E-27 |
| CTBS       | -1.063436679 | 4.616362459  | 2.62E-28 | 1.07E-26 |
| GBA        | 1.369444218  | 6.136778436  | 2.72E-28 | 1.11E-26 |
| MMRN1      | -1.959030594 | 1.815626699  | 2.82E-28 | 1.15E-26 |
| SREBF2-AS1 | 1.597813349  | 1.202416969  | 3.27E-28 | 1.33E-26 |
| COL25A1    | -2.647442643 | -1.220217452 | 3.35E-28 | 1.36E-26 |
| AL121906.2 | 2.810007446  | -1.211850284 | 4.22E-28 | 1.71E-26 |
| B4GALNT1   | 4.209876814  | 2.73093338   | 4.23E-28 | 1.71E-26 |
| SPSB2      | 1.497670063  | 3.105741976  | 4.25E-28 | 1.72E-26 |
| NXPH4      | 5.630668269  | 2.367137103  | 4.25E-28 | 1.72E-26 |
| GNAZ       | 3.621037023  | 3.337767611  | 4.27E-28 | 1.72E-26 |
| CCHCR1     | 1.408220489  | 4.774340009  | 4.30E-28 | 1.73E-26 |
| LINC01311  | 2.141284716  | -0.791388365 | 4.69E-28 | 1.89E-26 |
| ZNF251     | 1.253517039  | 3.48355724   | 4.80E-28 | 1.92E-26 |
| PLIN2      | -1.664653141 | 8.533936223  | 4.90E-28 | 1.96E-26 |
| ALDH8A1    | -1.914427229 | 6.627365732  | 5.39E-28 | 2.15E-26 |
| HELLS      | 2.433744897  | 2.7088137    | 6.19E-28 | 2.47E-26 |
| ALB        | -1.833471096 | 15.92169367  | 6.34E-28 | 2.52E-26 |
| CCT3       | 1.163480202  | 8.267092326  | 7.78E-28 | 3.09E-26 |
| NSMCE2     | 1.429661763  | 4.30182289   | 7.96E-28 | 3.15E-26 |
| FAM13A     | -1.877650345 | 4.466328039  | 7.97E-28 | 3.15E-26 |
| DUSP1      | -1.673787388 | 7.95713914   | 8.18E-28 | 3.24E-26 |
| STEAP3     | -1.714314304 | 6.957479018  | 8.47E-28 | 3.34E-26 |
| PLK4       | 2.133760411  | 1.252838148  | 8.88E-28 | 3.50E-26 |
| RTL10      | 1.119709558  | 3.642489595  | 9.15E-28 | 3.60E-26 |
| RAD54B     | 1.621920026  | 0.624688368  | 9.24E-28 | 3.63E-26 |
| HMGCL      | -1.293444287 | 7.342020113  | 9.38E-28 | 3.67E-26 |
| KDM6B      | -1.036484918 | 4.551222124  | 9.45E-28 | 3.70E-26 |
| WDR76      | 2.237552552  | 2.487882591  | 9.52E-28 | 3.72E-26 |
| VPS72      | 1.064724688  | 5.121766771  | 1.08E-27 | 4.23E-26 |
| WDHD1      | 1.996527392  | 1.890690238  | 1.09E-27 | 4.24E-26 |
| BCAN       | 4.581980481  | 1.50631714   | 1.10E-27 | 4.26E-26 |
| FAAP24     | 1.444174569  | 1.141859394  | 1.12E-27 | 4.33E-26 |
| AL355488.1 | 1.923673157  | 1.139296668  | 1.17E-27 | 4.53E-26 |
| CYP4V2     | -1.434814852 | 6.593827268  | 1.18E-27 | 4.54E-26 |
| SAPCD1     | 2.802350595  | -1.220517671 | 1.18E-27 | 4.54E-26 |
| ZCCHC24    | -1.095954166 | 5.254592488  | 1.19E-27 | 4.58E-26 |
| DLC1       | -1.265059409 | 5.064262414  | 1.29E-27 | 4.96E-26 |
| EPB41L4B   | -1.570681775 | 5.795711432  | 1.39E-27 | 5.32E-26 |
| CUL7       | 1.154561444  | 5.089548491  | 1.57E-27 | 6.00E-26 |
| MYLK-AS1   | 2.144483802  | -0.753479632 | 1.61E-27 | 6.18E-26 |
| IL6ST      | -1.006779986 | 7.675131356  | 1.65E-27 | 6.30E-26 |
| AC026369.3 | -2.607910309 | -2.835450658 | 1.66E-27 | 6.32E-26 |
| COG2       | 1.012973051  | 4.4236336    | 1.75E-27 | 6.65E-26 |
| NAT9       | 1.218483128  | 4.600624489  | 1.86E-27 | 7.05E-26 |
| PLPBP      | -1.088684044 | 5.483962271  | 1.98E-27 | 7.48E-26 |
| TP73       | 3.424680839  | 1.48755946   | 1.98E-27 | 7.48E-26 |
| GPRIN1     | 2.59553947   | 1.793654811  | 2.16E-27 | 8.16E-26 |
| SLC9B2     | -1.43881078  | 4.708638282  | 2.25E-27 | 8.50E-26 |
| TENT5A     | -1.419280102 | 4.78993585   | 2.32E-27 | 8.75E-26 |
| TRPC6      | 2.084331318  | -0.326015907 | 2.34E-27 | 8.81E-26 |
| DEPDC1B    | 3.200245596  | 2.207596653  | 2.36E-27 | 8.86E-26 |
| SCNM1      | 1.379086988  | 4.519645338  | 2.42E-27 | 9.06E-26 |
| EFNA4      | 1.549157619  | 3.125804075  | 2.56E-27 | 9.57E-26 |
| ESR1       | -2.476653657 | 3.581503391  | 2.59E-27 | 9.68E-26 |

|            |              |              |          |          |
|------------|--------------|--------------|----------|----------|
| KCTD7      | 1.309256819  | 2.475901272  | 2.60E-27 | 9.69E-26 |
| ACBD6      | 1.079017516  | 4.759808888  | 2.74E-27 | 1.02E-25 |
| COL9A1     | 3.793055709  | -0.839827349 | 3.12E-27 | 1.16E-25 |
| AQP3       | -1.555160377 | 5.978228296  | 3.38E-27 | 1.25E-25 |
| AJM1       | 1.871852965  | 2.185237962  | 3.44E-27 | 1.27E-25 |
| PPP1R3B    | -1.661912359 | 6.536686339  | 3.63E-27 | 1.34E-25 |
| CDC7       | 2.058151959  | 1.884865224  | 3.72E-27 | 1.37E-25 |
| ZIC5       | 6.578038686  | 0.843699666  | 3.76E-27 | 1.38E-25 |
| GLI4       | 1.551385428  | 3.71168847   | 3.77E-27 | 1.38E-25 |
| ARL5B      | -1.046712089 | 5.488802031  | 3.83E-27 | 1.40E-25 |
| AC016773.1 | 2.526241184  | -1.333779856 | 3.91E-27 | 1.43E-25 |
| AL357055.3 | -1.48048433  | -1.508308437 | 4.48E-27 | 1.64E-25 |
| TSC22D2    | -1.000734239 | 4.59241176   | 4.75E-27 | 1.73E-25 |
| OIP5       | 2.239647101  | 0.898763249  | 4.89E-27 | 1.78E-25 |
| RHOB       | -1.468233128 | 9.123699717  | 4.91E-27 | 1.78E-25 |
| RBMS3      | -1.534260967 | 1.980241027  | 5.23E-27 | 1.90E-25 |
| MAFG-DT    | 2.921125512  | 1.155366809  | 5.27E-27 | 1.91E-25 |
| HCG25      | 1.722278164  | -0.934453117 | 5.39E-27 | 1.95E-25 |
| BLM        | 2.450063338  | 1.538847387  | 5.53E-27 | 2.00E-25 |
| TIGD1      | 1.785513814  | 1.403909225  | 5.54E-27 | 2.00E-25 |
| CLK2       | 1.037685945  | 4.76535222   | 5.65E-27 | 2.03E-25 |
| MYO19      | 1.205944418  | 4.640458839  | 5.96E-27 | 2.14E-25 |
| RAD51AP1   | 2.274676366  | 1.769739032  | 5.97E-27 | 2.14E-25 |
| AC102953.2 | 2.049527057  | 0.34333244   | 6.14E-27 | 2.20E-25 |
| IGF2BP1    | 6.982597853  | 3.657065272  | 6.16E-27 | 2.20E-25 |
| PAMR1      | -1.953923056 | 2.116563736  | 6.49E-27 | 2.32E-25 |
| CBX2       | 2.690237296  | 2.169440744  | 6.95E-27 | 2.47E-25 |
| NSUN5P1    | 1.548423361  | 2.752326958  | 7.55E-27 | 2.68E-25 |
| TLR4       | -1.48539071  | 2.994531547  | 7.57E-27 | 2.68E-25 |
| NELFE      | 1.345728901  | 5.970124223  | 7.87E-27 | 2.78E-25 |
| KLF11      | -1.227232211 | 4.947977924  | 8.17E-27 | 2.88E-25 |
| NSUN5P2    | 1.651940481  | -0.038338147 | 8.26E-27 | 2.91E-25 |
| POLD1      | 1.271708693  | 4.209719649  | 8.31E-27 | 2.92E-25 |
| DUSP9      | 5.004351893  | 4.498267789  | 8.50E-27 | 2.98E-25 |
| TMEM201    | 1.304723867  | 3.199756865  | 8.84E-27 | 3.09E-25 |
| BDH2       | -1.317906143 | 4.61408959   | 9.91E-27 | 3.46E-25 |
| MT2A       | -2.461577884 | 9.569222447  | 1.14E-26 | 3.96E-25 |
| FBP1       | -2.032292995 | 8.349199418  | 1.20E-26 | 4.18E-25 |
| DSN1       | 1.264421497  | 3.91571325   | 1.24E-26 | 4.32E-25 |
| LINC02475  | 6.398029811  | -0.839951118 | 1.27E-26 | 4.39E-25 |
| AL137060.1 | 2.643356763  | -2.271400042 | 1.33E-26 | 4.59E-25 |
| HOXD9      | 4.582915391  | 0.778759019  | 1.35E-26 | 4.67E-25 |
| NUDT10     | -2.966765654 | -2.084874988 | 1.36E-26 | 4.70E-25 |
| TAZ        | 1.051831327  | 4.499473061  | 1.43E-26 | 4.93E-25 |
| NSUN6      | -1.131956838 | 4.531733479  | 1.43E-26 | 4.94E-25 |
| NUDT17     | 1.819765799  | 0.713572176  | 1.45E-26 | 5.00E-25 |
| PIGU       | 1.113736967  | 4.586560671  | 1.60E-26 | 5.49E-25 |
| ZNF219     | 1.279433769  | 4.615113734  | 1.70E-26 | 5.81E-25 |
| KLF6       | -1.340089574 | 7.055440718  | 1.71E-26 | 5.84E-25 |
| UBE2S      | 1.953611602  | 3.784939639  | 1.83E-26 | 6.25E-25 |
| AC124944.3 | 2.146288335  | -1.070498823 | 1.86E-26 | 6.34E-25 |
| CD160      | -1.683651254 | -0.685329493 | 2.22E-26 | 7.55E-25 |
| KIAA1522   | 1.501748716  | 5.997414228  | 2.35E-26 | 7.96E-25 |
| HIVEP1     | -1.155305999 | 4.03062847   | 2.42E-26 | 8.19E-25 |
| CXCR2      | -2.277554498 | -1.160048286 | 2.63E-26 | 8.89E-25 |
| KBTBD11    | -2.343790731 | 2.864937714  | 2.88E-26 | 9.72E-25 |
| ADK        | -1.120759125 | 5.617219623  | 3.01E-26 | 1.02E-24 |
| PRAM1      | -1.552626115 | 0.322216844  | 3.11E-26 | 1.05E-24 |

|             |              |              |          |          |
|-------------|--------------|--------------|----------|----------|
| AL359510.2  | 3.089750585  | -2.095597882 | 3.13E-26 | 1.05E-24 |
| ST8SIA6     | -2.442337282 | -2.152248169 | 3.16E-26 | 1.06E-24 |
| FAM111B     | 2.608976944  | 2.674371628  | 3.26E-26 | 1.09E-24 |
| SNORD104    | 2.729652254  | 0.956777862  | 3.52E-26 | 1.18E-24 |
| AC055713.1  | 1.328855362  | 0.768702231  | 3.54E-26 | 1.19E-24 |
| AC145207.9  | 2.514669953  | -1.509399181 | 3.83E-26 | 1.28E-24 |
| ABCC5       | 1.081574224  | 3.775272542  | 4.01E-26 | 1.34E-24 |
| FAM57B      | 3.89942742   | -1.907993529 | 4.21E-26 | 1.40E-24 |
| PLAC8       | -2.3190054   | 1.562623989  | 4.27E-26 | 1.42E-24 |
| SLC31A1     | -1.046528358 | 6.757354069  | 4.46E-26 | 1.48E-24 |
| TMEM220     | -1.493612812 | 5.41773326   | 4.73E-26 | 1.57E-24 |
| AL023803.2  | 3.013251067  | -1.606462272 | 4.87E-26 | 1.61E-24 |
| RUSC1-AS1   | 1.826959059  | 2.242074553  | 5.06E-26 | 1.67E-24 |
| AC006277.1  | 1.994593095  | -1.475369157 | 5.27E-26 | 1.74E-24 |
| ASS1P1      | -1.867587546 | 0.363304744  | 5.51E-26 | 1.81E-24 |
| VMO1        | -1.425251448 | 1.64251352   | 5.66E-26 | 1.86E-24 |
| EPS8L3      | 4.919206572  | 3.930463394  | 5.94E-26 | 1.95E-24 |
| CRNDE       | 3.374615908  | 1.570514602  | 6.31E-26 | 2.07E-24 |
| VSIG4       | -1.916324115 | 3.329103581  | 6.59E-26 | 2.15E-24 |
| NOCT        | -1.775256334 | 2.75180333   | 7.02E-26 | 2.29E-24 |
| POLA2       | 1.278627672  | 3.607903852  | 7.31E-26 | 2.38E-24 |
| HHIP        | -3.317505243 | 2.011783323  | 7.72E-26 | 2.50E-24 |
| KIFC2       | 1.947383806  | 3.422683163  | 8.14E-26 | 2.63E-24 |
| CBR4        | -1.176620971 | 4.923788483  | 8.30E-26 | 2.68E-24 |
| MSH5        | 2.246450024  | 0.923592207  | 8.36E-26 | 2.70E-24 |
| TJP2        | -1.04872092  | 5.921016767  | 8.46E-26 | 2.73E-24 |
| PDE7B       | -1.683748067 | 1.665605415  | 8.60E-26 | 2.77E-24 |
| GABRQ       | 4.478637636  | -1.462604942 | 8.91E-26 | 2.86E-24 |
| ROBO1       | 2.905092146  | 5.872175144  | 9.19E-26 | 2.95E-24 |
| PALM2       | -1.804749228 | 0.298853131  | 9.97E-26 | 3.20E-24 |
| RHNO1       | 1.147698531  | 3.355495216  | 1.02E-25 | 3.26E-24 |
| MTATP6P1    | -1.369389293 | 9.422161088  | 1.02E-25 | 3.26E-24 |
| TMEM106C    | 1.484590682  | 5.839942628  | 1.07E-25 | 3.42E-24 |
| EDNRB       | -1.438046254 | 4.514721158  | 1.08E-25 | 3.44E-24 |
| LHX4        | 2.5190577    | -0.315158931 | 1.09E-25 | 3.48E-24 |
| NECAB3      | 1.472202573  | 5.280610362  | 1.13E-25 | 3.60E-24 |
| BHLHE40     | -1.389790108 | 7.237150398  | 1.17E-25 | 3.73E-24 |
| ID1         | -1.836401556 | 4.905075275  | 1.19E-25 | 3.78E-24 |
| JDP2        | -1.200642175 | 3.408173986  | 1.25E-25 | 3.94E-24 |
| SF3B4       | 1.053280792  | 6.089209505  | 1.31E-25 | 4.13E-24 |
| AC091057.1  | 2.122397342  | 0.680289147  | 1.32E-25 | 4.16E-24 |
| RXFP1       | -1.789035544 | -1.07203856  | 1.35E-25 | 4.24E-24 |
| AC010973.2  | 1.806217659  | -0.606748772 | 1.36E-25 | 4.27E-24 |
| ACAD11      | -1.71289835  | 1.138541979  | 1.53E-25 | 4.81E-24 |
| CCNE1       | 4.007663806  | 2.739309518  | 1.54E-25 | 4.81E-24 |
| LINC02163   | 7.276802801  | -1.008934399 | 1.54E-25 | 4.81E-24 |
| C20orf204   | 5.068232091  | 2.390937092  | 1.66E-25 | 5.19E-24 |
| ECHS1       | -1.22041733  | 9.138562483  | 1.74E-25 | 5.42E-24 |
| LENG8-AS1   | 1.506991195  | -0.145393653 | 1.79E-25 | 5.58E-24 |
| HAUS5       | 1.005653418  | 3.606135686  | 1.83E-25 | 5.70E-24 |
| MCC         | -1.738482654 | 3.985197487  | 1.84E-25 | 5.72E-24 |
| TCOF1       | 1.053253817  | 5.091285987  | 1.85E-25 | 5.75E-24 |
| FBXL18      | 1.361738513  | 1.596669208  | 1.94E-25 | 6.01E-24 |
| ZNF252P-AS1 | 2.120791376  | -1.582742482 | 2.03E-25 | 6.30E-24 |
| CYP4A22     | -2.169031141 | 6.792292511  | 2.53E-25 | 7.82E-24 |
| CD300E      | -1.715023948 | 0.076680103  | 2.62E-25 | 8.07E-24 |
| NT5DC2      | 2.636809691  | 4.463467384  | 2.62E-25 | 8.07E-24 |
| CHEK1       | 1.65581539   | 2.767899536  | 2.76E-25 | 8.49E-24 |

|            |              |              |          |          |
|------------|--------------|--------------|----------|----------|
| CTHRC1     | 3.977280438  | 2.701168238  | 2.79E-25 | 8.56E-24 |
| DUXAP10    | 3.915105882  | -1.625760313 | 2.86E-25 | 8.79E-24 |
| SLC22A10   | -2.316187443 | 4.822793219  | 2.88E-25 | 8.82E-24 |
| ASPA       | -1.926494531 | 1.901519416  | 2.88E-25 | 8.83E-24 |
| AL133367.1 | 2.130826923  | -0.485512057 | 3.06E-25 | 9.35E-24 |
| SCRIB      | 1.309698636  | 6.413755105  | 3.07E-25 | 9.37E-24 |
| PTPN3      | -1.021812195 | 5.460612791  | 3.29E-25 | 1.00E-23 |
| NUDT1      | 1.794067132  | 3.175359877  | 3.37E-25 | 1.02E-23 |
| NOL12      | 1.14917254   | 1.754789283  | 3.37E-25 | 1.02E-23 |
| PTGES2-AS1 | 3.451156335  | -2.313543178 | 3.40E-25 | 1.03E-23 |
| MAST2      | 1.057607899  | 4.675202814  | 3.41E-25 | 1.03E-23 |
| C17orf53   | 1.918934335  | 1.41578469   | 3.56E-25 | 1.08E-23 |
| ASS1       | -1.761020256 | 9.976902604  | 4.75E-25 | 1.43E-23 |
| PROS1      | -1.219164169 | 7.550943317  | 4.90E-25 | 1.48E-23 |
| ASS1P11    | -2.747291388 | -1.773334272 | 5.07E-25 | 1.52E-23 |
| CXCR1      | -2.269997092 | -1.113892422 | 5.42E-25 | 1.63E-23 |
| RNFT2      | 2.683140954  | 0.762969626  | 5.44E-25 | 1.63E-23 |
| FOXK1      | 1.217687391  | 4.15864955   | 5.99E-25 | 1.80E-23 |
| DUXAP9     | 3.707845601  | -1.713685552 | 6.11E-25 | 1.83E-23 |
| EMC3-AS1   | 2.205474564  | -0.148615316 | 6.16E-25 | 1.84E-23 |
| SPSB4      | -2.681821428 | -2.266864541 | 6.23E-25 | 1.86E-23 |
| DNAH14     | 1.265629179  | 2.558757068  | 7.46E-25 | 2.22E-23 |
| AHSA2P     | 1.35621216   | 4.205246318  | 7.53E-25 | 2.24E-23 |
| TEX19      | 4.658520825  | -2.075475118 | 8.01E-25 | 2.37E-23 |
| ETFRF1     | -1.03249085  | 4.665306849  | 8.24E-25 | 2.44E-23 |
| C8orf33    | 1.270044236  | 5.567110061  | 8.52E-25 | 2.52E-23 |
| CPT2       | -1.191352315 | 5.980389988  | 9.14E-25 | 2.70E-23 |
| RMDN2      | -1.150538627 | 3.322943794  | 9.61E-25 | 2.82E-23 |
| KNTC1      | 1.928989012  | 3.417820938  | 1.01E-24 | 2.96E-23 |
| SMPD3      | -1.93774364  | 1.38408042   | 1.07E-24 | 3.14E-23 |
| AC107375.1 | 1.492767524  | 0.448701239  | 1.08E-24 | 3.16E-23 |
| TRIM71     | 8.471907651  | 2.823535489  | 1.10E-24 | 3.20E-23 |
| MCM4       | 1.610093434  | 5.34470181   | 1.13E-24 | 3.28E-23 |
| WDR66      | -1.603369392 | 0.073322821  | 1.22E-24 | 3.54E-23 |
| EPHX2      | -1.518667615 | 7.019925749  | 1.34E-24 | 3.89E-23 |
| LY6H       | 4.253552758  | -0.798866345 | 1.34E-24 | 3.89E-23 |
| LOXL2      | 1.62609723   | 3.696876972  | 1.38E-24 | 4.01E-23 |
| FOXS1      | 2.827667297  | 1.072447003  | 1.39E-24 | 4.01E-23 |
| TSLP       | -2.349602605 | 1.335812863  | 1.43E-24 | 4.12E-23 |
| SARDH      | -1.489012882 | 6.83891499   | 1.46E-24 | 4.21E-23 |
| TRAF2      | 1.154698691  | 4.573018277  | 1.49E-24 | 4.31E-23 |
| SIGLEC16   | -1.670212812 | -0.753004506 | 1.60E-24 | 4.60E-23 |
| DNAJC6     | 2.582650314  | 2.071433929  | 1.66E-24 | 4.76E-23 |
| LAMA4      | 1.516172064  | 4.449196481  | 1.90E-24 | 5.45E-23 |
| GLYATL1    | -2.05535975  | 6.736745207  | 1.92E-24 | 5.48E-23 |
| PIM1       | -1.387295878 | 5.375665695  | 2.36E-24 | 6.76E-23 |
| AC129507.1 | -1.793404706 | -1.526697212 | 2.42E-24 | 6.90E-23 |
| DTYMK      | 1.307522664  | 4.531407929  | 2.48E-24 | 7.08E-23 |
| SPATC1L    | 2.890862386  | 2.273460251  | 2.49E-24 | 7.10E-23 |
| AC018809.1 | 2.516418136  | -2.334367646 | 2.54E-24 | 7.22E-23 |
| TPX2       | 2.106956461  | 4.640439804  | 2.60E-24 | 7.37E-23 |
| HOXD8      | 3.079527648  | -0.130621203 | 2.60E-24 | 7.38E-23 |
| AMHR2      | -2.990215633 | -2.096013196 | 2.67E-24 | 7.57E-23 |
| TPPP2      | -2.127596767 | 0.873557058  | 2.73E-24 | 7.71E-23 |
| CYP39A1    | -2.434561264 | 4.439727784  | 2.79E-24 | 7.88E-23 |
| ZNF775     | 1.661786454  | 3.974429469  | 2.91E-24 | 8.22E-23 |
| NOTCH3     | 2.049126731  | 5.291662312  | 3.09E-24 | 8.71E-23 |
| KPNA2      | 1.422211539  | 5.6524885    | 3.25E-24 | 9.14E-23 |

|            |              |              |          |          |
|------------|--------------|--------------|----------|----------|
| RCL1       | -1.4606037   | 5.166012086  | 3.46E-24 | 9.73E-23 |
| AC010280.2 | -2.576088962 | -0.688839915 | 3.48E-24 | 9.77E-23 |
| MT1F       | -2.928239439 | 5.918781953  | 3.75E-24 | 1.05E-22 |
| SMG9       | 1.16072013   | 4.256861755  | 3.95E-24 | 1.11E-22 |
| ZNF696     | 1.203065349  | 2.749377092  | 4.52E-24 | 1.26E-22 |
| IRAK1      | 1.298561989  | 6.6944446933 | 4.63E-24 | 1.29E-22 |
| ASB16      | 2.07320943   | -0.300097086 | 4.73E-24 | 1.32E-22 |
| MT-CYB     | -1.236345967 | 12.94977543  | 4.74E-24 | 1.32E-22 |
| CCDC34     | 1.698114091  | 3.32158089   | 4.79E-24 | 1.33E-22 |
| BACE1-AS   | 1.251895763  | 0.883281928  | 4.93E-24 | 1.37E-22 |
| TSSK6      | 1.395469876  | 0.805303351  | 4.97E-24 | 1.38E-22 |
| SLC41A2    | -1.371505514 | 5.678917048  | 5.27E-24 | 1.46E-22 |
| ADAM15     | 1.317453     | 6.190673077  | 5.53E-24 | 1.53E-22 |
| ERFE       | 2.644292393  | 0.370524015  | 5.56E-24 | 1.53E-22 |
| AC110285.6 | 3.571049281  | -1.864205341 | 5.78E-24 | 1.59E-22 |
| CCDC25     | -1.003051909 | 4.974681465  | 5.89E-24 | 1.62E-22 |
| C8A        | -1.832836899 | 8.052133706  | 6.09E-24 | 1.67E-22 |
| KLKB1      | -1.630509139 | 6.667385575  | 6.12E-24 | 1.68E-22 |
| LIN9       | 1.555024763  | 1.869184361  | 6.16E-24 | 1.69E-22 |
| MCM7       | 1.468490965  | 6.212911876  | 6.34E-24 | 1.74E-22 |
| GRAMD1C    | -1.587304775 | 3.424624369  | 6.48E-24 | 1.77E-22 |
| ELMSAN1    | -1.021431185 | 4.053330105  | 6.62E-24 | 1.81E-22 |
| FLAD1      | 1.01487061   | 5.584949306  | 6.99E-24 | 1.91E-22 |
| AC004080.2 | 6.566462756  | -1.863049175 | 6.99E-24 | 1.91E-22 |
| COA6       | 1.268801623  | 4.88435602   | 7.44E-24 | 2.03E-22 |
| CKS1B      | 1.22905065   | 4.427746361  | 7.94E-24 | 2.16E-22 |
| TMC7       | 2.156272788  | 1.015099749  | 7.99E-24 | 2.17E-22 |
| ZBTB12     | 1.896960617  | 1.483878109  | 8.91E-24 | 2.41E-22 |
| ARHGAP33   | 1.553675586  | 2.356528136  | 8.94E-24 | 2.42E-22 |
| TTC36      | -2.773994409 | 4.523857208  | 9.22E-24 | 2.49E-22 |
| PDLIM1P4   | -1.669173784 | -1.766657137 | 9.33E-24 | 2.52E-22 |
| PDE2A      | -1.499535143 | 3.248863892  | 9.52E-24 | 2.57E-22 |
| WEE1       | -1.173326602 | 5.035054017  | 9.78E-24 | 2.63E-22 |
| MS4A7      | -1.496961814 | 3.915405561  | 1.01E-23 | 2.73E-22 |
| MT-ND1     | -1.166441907 | 12.28197047  | 1.08E-23 | 2.91E-22 |
| FANCE      | 1.659039715  | 1.730287945  | 1.09E-23 | 2.93E-22 |
| YEATS2     | 1.043826853  | 3.793898169  | 1.12E-23 | 2.99E-22 |
| EPM2A      | -1.019726701 | 2.357902253  | 1.14E-23 | 3.05E-22 |
| CFI        | -1.372669803 | 8.659528387  | 1.15E-23 | 3.08E-22 |
| MYO1B      | -1.153341853 | 7.879101513  | 1.30E-23 | 3.45E-22 |
| MRPL53     | 1.00040122   | 1.392913033  | 1.30E-23 | 3.45E-22 |
| GCH1       | -1.522449449 | 5.417816443  | 1.30E-23 | 3.46E-22 |
| TRIM65     | 1.044793176  | 3.696787014  | 1.34E-23 | 3.56E-22 |
| FAM72C     | 3.108228984  | -1.886590206 | 1.38E-23 | 3.67E-22 |
| HSF4       | 1.79460024   | 3.118134278  | 1.41E-23 | 3.72E-22 |
| OSBPL3     | 1.762821953  | 2.879667391  | 1.44E-23 | 3.79E-22 |
| CLSPN      | 2.797071052  | 0.702797835  | 1.47E-23 | 3.88E-22 |
| NAA40      | 1.084598869  | 3.333936845  | 1.52E-23 | 3.99E-22 |
| CIP2A      | 2.171276679  | 1.510460437  | 1.52E-23 | 4.00E-22 |
| ORM1       | -1.846692247 | 11.5420411   | 1.57E-23 | 4.11E-22 |
| LIG1       | 1.130702336  | 4.707032161  | 1.77E-23 | 4.65E-22 |
| SLC7A11    | 4.308068505  | 2.750053947  | 1.81E-23 | 4.74E-22 |
| SNRPE      | 1.18017192   | 5.629760398  | 1.82E-23 | 4.77E-22 |
| CDCA4      | 1.397009846  | 2.50028206   | 1.98E-23 | 5.16E-22 |
| ADGRE1     | -2.067124819 | -0.060359749 | 2.04E-23 | 5.31E-22 |
| MCM5       | 1.400433803  | 5.660686424  | 2.12E-23 | 5.52E-22 |
| MAN1A1     | -1.177768912 | 7.282279905  | 2.15E-23 | 5.60E-22 |
| C11orf54   | -1.158741946 | 6.537044624  | 2.17E-23 | 5.66E-22 |

|             |              |              |          |          |
|-------------|--------------|--------------|----------|----------|
| KIF24       | 1.892729978  | 1.034261361  | 2.26E-23 | 5.88E-22 |
| MYOM2       | -2.061711642 | 1.062140301  | 2.35E-23 | 6.09E-22 |
| PNPLA7      | -1.386373048 | 3.504332982  | 2.44E-23 | 6.33E-22 |
| INS-IGF2    | -4.13908567  | 0.689986819  | 2.55E-23 | 6.58E-22 |
| MIR4435-2HG | 1.836756105  | 3.841015908  | 2.67E-23 | 6.87E-22 |
| C6          | -1.961832085 | 8.298809025  | 2.69E-23 | 6.92E-22 |
| AC024361.1  | 2.199779559  | -1.516661386 | 2.71E-23 | 6.95E-22 |
| ENAH        | 1.556193598  | 5.999386148  | 2.73E-23 | 6.99E-22 |
| STARD5      | -1.503221229 | 2.460945424  | 3.03E-23 | 7.74E-22 |
| AC109322.1  | 2.042738351  | 0.794064274  | 3.07E-23 | 7.81E-22 |
| HOXA10      | 5.612149318  | 1.187140691  | 3.19E-23 | 8.10E-22 |
| RAB24       | 1.06122772   | 2.970795184  | 3.22E-23 | 8.17E-22 |
| ADAMTS1     | -1.572223433 | 4.80629299   | 3.28E-23 | 8.30E-22 |
| SUCLG2      | -1.063376338 | 7.06376415   | 3.28E-23 | 8.30E-22 |
| RFX5        | 1.163196189  | 4.907064197  | 3.41E-23 | 8.63E-22 |
| TCF3        | 1.036522309  | 4.894468079  | 3.44E-23 | 8.67E-22 |
| GAS5        | 1.878429077  | 6.689558176  | 3.54E-23 | 8.92E-22 |
| BACH2       | -1.725564953 | 1.618117159  | 3.60E-23 | 9.08E-22 |
| ABAT        | -1.600342495 | 8.305677041  | 3.62E-23 | 9.10E-22 |
| SSR2        | 1.193331525  | 7.903776271  | 3.66E-23 | 9.19E-22 |
| SUCO        | 1.120167704  | 5.001618047  | 3.87E-23 | 9.72E-22 |
| KRTCAP2     | 1.163730467  | 4.798514015  | 3.94E-23 | 9.89E-22 |
| C1S         | -1.337847181 | 11.00572918  | 3.99E-23 | 9.99E-22 |
| COL4A1      | 1.77871274   | 7.516188102  | 4.07E-23 | 1.02E-21 |
| IQCE        | 1.152503372  | 3.694202629  | 4.21E-23 | 1.05E-21 |
| MAG         | -2.894757482 | -2.537165853 | 4.29E-23 | 1.07E-21 |
| LINC02202   | 2.666280381  | -2.060723443 | 4.43E-23 | 1.10E-21 |
| MAGEA1      | 9.011943288  | 2.880740365  | 4.44E-23 | 1.11E-21 |
| RAB11FIP4   | 1.828374486  | 5.03570902   | 4.60E-23 | 1.14E-21 |
| NCAPD2      | 1.419673517  | 4.654774087  | 4.97E-23 | 1.24E-21 |
| FBF1        | 1.430043634  | 1.366421915  | 5.13E-23 | 1.27E-21 |
| FSTL4       | 4.512409362  | 1.138571596  | 5.32E-23 | 1.32E-21 |
| MAP3K9      | 1.31199841   | 2.419691669  | 5.47E-23 | 1.35E-21 |
| ACLY        | 1.049699925  | 6.402253693  | 5.78E-23 | 1.43E-21 |
| ATAD5       | 1.651355325  | 1.42536694   | 5.81E-23 | 1.43E-21 |
| C11orf96    | -1.912862189 | 4.317833772  | 6.07E-23 | 1.50E-21 |
| SFRP1       | -2.45295477  | 0.996120019  | 6.20E-23 | 1.53E-21 |
| CNIH4       | 1.083128772  | 5.009803842  | 6.31E-23 | 1.55E-21 |
| TCF15       | 2.288352046  | -0.644394445 | 6.35E-23 | 1.56E-21 |
| LINC00261   | -1.372227352 | 7.153136703  | 6.48E-23 | 1.59E-21 |
| ZNF605      | 1.116321745  | 3.057861694  | 6.87E-23 | 1.68E-21 |
| CFL2        | -1.054021738 | 6.12883768   | 6.97E-23 | 1.70E-21 |
| PMFBP1      | 2.737559529  | -0.125101765 | 7.10E-23 | 1.73E-21 |
| DSE         | -1.42188882  | 2.852162547  | 7.27E-23 | 1.77E-21 |
| SNRPB       | 1.145675469  | 6.960526322  | 7.27E-23 | 1.77E-21 |
| ZKSCAN3     | 1.425231846  | 2.750967183  | 7.61E-23 | 1.85E-21 |
| RASGRF2     | 1.881120585  | 2.503164992  | 7.85E-23 | 1.91E-21 |
| GPR19       | 2.495416629  | -1.120376676 | 7.86E-23 | 1.91E-21 |
| AXL         | -1.374547259 | 3.587220898  | 8.03E-23 | 1.94E-21 |
| AL136162.1  | 2.166714411  | -1.476175926 | 8.11E-23 | 1.96E-21 |
| G6PD        | 2.597462491  | 5.209058935  | 8.30E-23 | 2.00E-21 |
| PTP4A3      | 2.549575383  | 4.599644955  | 8.62E-23 | 2.08E-21 |
| MT1X        | -2.546957906 | 8.11723447   | 9.19E-23 | 2.21E-21 |
| EBF1        | 2.141230885  | 1.73147693   | 9.91E-23 | 2.38E-21 |
| HSF2BP      | 2.100956619  | -1.427350193 | 1.02E-22 | 2.45E-21 |
| GPSM2       | 1.60162088   | 2.147529037  | 1.06E-22 | 2.53E-21 |
| ST8SIA6-AS1 | 5.704032519  | 1.795576114  | 1.12E-22 | 2.68E-21 |
| FAM149A     | -1.362255105 | 4.101504037  | 1.19E-22 | 2.85E-21 |

|             |              |              |          |          |
|-------------|--------------|--------------|----------|----------|
| PMS2P3      | 1.092399346  | 0.481122473  | 1.22E-22 | 2.92E-21 |
| NGFR        | -2.041448195 | 3.696371984  | 1.23E-22 | 2.95E-21 |
| PSMC3IP     | 1.609826191  | 0.702087048  | 1.25E-22 | 2.99E-21 |
| SIX2        | 6.148112513  | -0.019683657 | 1.26E-22 | 3.00E-21 |
| CCL3        | -1.628335081 | 2.053244056  | 1.27E-22 | 3.02E-21 |
| FANCB       | 2.233324498  | -1.245926125 | 1.27E-22 | 3.02E-21 |
| FBXL19      | 1.067559294  | 2.904932409  | 1.28E-22 | 3.05E-21 |
| PADI4       | -2.23536776  | -2.676238798 | 1.29E-22 | 3.07E-21 |
| ARHGEF11    | 1.144751164  | 5.55017184   | 1.31E-22 | 3.11E-21 |
| GPAA1       | 1.40480254   | 7.679356171  | 1.35E-22 | 3.20E-21 |
| TRIM59      | 1.934340776  | 0.905043044  | 1.36E-22 | 3.21E-21 |
| TSEN54      | 1.034177078  | 4.576531464  | 1.36E-22 | 3.23E-21 |
| MSH5-SAPCD1 | 1.785088526  | -0.345136406 | 1.41E-22 | 3.33E-21 |
| SCP2        | -1.373777685 | 8.730020804  | 1.43E-22 | 3.37E-21 |
| HBB         | -2.092745197 | 4.486595717  | 1.43E-22 | 3.38E-21 |
| AC092821.1  | 2.429020167  | -1.515590294 | 1.46E-22 | 3.43E-21 |
| AC116049.2  | 5.045701981  | -1.783846316 | 1.63E-22 | 3.82E-21 |
| FEZ1        | -1.471722    | 2.205868572  | 1.63E-22 | 3.83E-21 |
| FPR1        | -1.94572151  | 1.47800366   | 1.64E-22 | 3.85E-21 |
| SIX4        | 3.360270038  | 0.211324512  | 1.68E-22 | 3.94E-21 |
| TMEM145     | 3.926995239  | -0.05401488  | 1.72E-22 | 4.02E-21 |
| SP6         | 3.113500868  | 0.301803337  | 1.91E-22 | 4.47E-21 |
| ATAD2       | 1.702407493  | 5.373428637  | 2.03E-22 | 4.74E-21 |
| GBAP1       | 1.766287314  | 0.67956201   | 2.04E-22 | 4.75E-21 |
| MTX1P1      | 1.961222287  | 0.980841294  | 2.06E-22 | 4.80E-21 |
| TOB2P1      | 2.505047131  | -0.766071282 | 2.09E-22 | 4.87E-21 |
| H2AFZ       | 1.163347547  | 6.414473346  | 2.09E-22 | 4.87E-21 |
| SEC24B      | -1.052917864 | 5.200866797  | 2.13E-22 | 4.96E-21 |
| ZC3H3       | 1.120839265  | 4.957806368  | 2.21E-22 | 5.13E-21 |
| DNAJC9-AS1  | 1.487625415  | -1.526354244 | 2.39E-22 | 5.53E-21 |
| HOGA1       | -1.808900316 | 4.586413164  | 2.46E-22 | 5.69E-21 |
| MRAP2       | 4.168654199  | 1.867908749  | 2.52E-22 | 5.81E-21 |
| KLC2        | 1.134616268  | 3.631053922  | 2.53E-22 | 5.84E-21 |
| PLGLB2      | -1.902574159 | 1.864931768  | 2.57E-22 | 5.93E-21 |
| YPEL2       | -1.049818824 | 4.659669277  | 2.61E-22 | 6.01E-21 |
| GAREM1      | -1.331043674 | 3.505093627  | 2.70E-22 | 6.21E-21 |
| AC110995.1  | -1.649127374 | -1.883958726 | 2.71E-22 | 6.23E-21 |
| NPEPL1      | 1.175086841  | 3.109958769  | 2.75E-22 | 6.31E-21 |
| MAPK8IP2    | 3.258083061  | 3.13842971   | 2.78E-22 | 6.36E-21 |
| AKR1C3      | 1.592597136  | 8.332745837  | 2.89E-22 | 6.60E-21 |
| GBA3        | -2.273825676 | 5.290839537  | 2.95E-22 | 6.72E-21 |
| ACADM       | -1.275231564 | 6.749979306  | 2.97E-22 | 6.75E-21 |
| RAB3B       | 3.769970304  | 3.551150529  | 3.02E-22 | 6.87E-21 |
| AC011294.1  | 4.430104622  | -0.159878512 | 3.07E-22 | 6.96E-21 |
| SOGA1       | 1.489162488  | 3.894091528  | 3.08E-22 | 6.99E-21 |
| TESMIN      | 2.295220469  | 1.159062041  | 3.17E-22 | 7.17E-21 |
| DPF3        | -1.792475682 | 1.005062015  | 3.36E-22 | 7.59E-21 |
| DCN         | -2.337030988 | 6.537267959  | 3.45E-22 | 7.79E-21 |
| AC100810.1  | -1.085035471 | 2.75849531   | 3.46E-22 | 7.80E-21 |
| COCH        | 4.323397524  | 2.230081672  | 3.47E-22 | 7.82E-21 |
| B4GALT1-AS1 | -1.391200421 | 0.562746931  | 3.48E-22 | 7.82E-21 |
| NDOR1       | 1.009015711  | 2.877464295  | 3.52E-22 | 7.92E-21 |
| KRT8P12     | 1.237152807  | 2.129255888  | 3.54E-22 | 7.95E-21 |
| CBX8        | 1.203377091  | 3.31718128   | 3.61E-22 | 8.09E-21 |
| CPLX2       | 9.227349359  | 5.78958935   | 3.73E-22 | 8.35E-21 |
| PLOD3       | 1.022532031  | 6.851139434  | 4.08E-22 | 9.11E-21 |
| AL451050.2  | 2.30099363   | -2.199337644 | 4.16E-22 | 9.28E-21 |
| BMS1P8      | 6.026233318  | 1.688098623  | 4.29E-22 | 9.56E-21 |



|            |              |              |          |          |
|------------|--------------|--------------|----------|----------|
| NAMPT      | -1.516057663 | 7.432807538  | 4.29E-22 | 9.56E-21 |
| ARHGAP10   | -1.492707825 | 2.678580943  | 4.41E-22 | 9.80E-21 |
| CENPO      | 1.555914991  | 2.491597205  | 4.41E-22 | 9.81E-21 |
| MYO18B     | 7.101782627  | 1.663458302  | 4.46E-22 | 9.91E-21 |
| CR1        | -2.082175178 | 0.226748466  | 4.71E-22 | 1.04E-20 |
| DNMT3A     | 1.296584459  | 4.420506034  | 4.78E-22 | 1.06E-20 |
| EGFL6      | 3.986397733  | -1.55320407  | 4.89E-22 | 1.08E-20 |
| PLPPR2     | 1.17381061   | 4.648484406  | 4.99E-22 | 1.10E-20 |
| ZNF789     | 1.038454859  | 2.294716808  | 5.00E-22 | 1.10E-20 |
| ACYP1      | 1.118281632  | 1.231447885  | 5.35E-22 | 1.18E-20 |
| CD244      | -1.688717416 | 0.213166736  | 5.45E-22 | 1.20E-20 |
| NR4A2      | -1.899477562 | 3.385281852  | 5.62E-22 | 1.23E-20 |
| CCR1       | -1.519155594 | 2.332847938  | 5.72E-22 | 1.25E-20 |
| AC080080.1 | 2.027943405  | -2.024241108 | 5.77E-22 | 1.26E-20 |
| CACYBP     | 1.047153805  | 5.588638256  | 5.97E-22 | 1.30E-20 |
| AL451074.2 | 2.002588991  | -1.792397334 | 6.04E-22 | 1.32E-20 |
| IL3RA      | 1.263646218  | 2.548331527  | 6.08E-22 | 1.32E-20 |
| TMEM56     | -1.376659706 | 6.851087217  | 6.54E-22 | 1.42E-20 |
| PXDNL      | 2.865292147  | -0.752424754 | 6.64E-22 | 1.44E-20 |
| CD200      | 1.87219607   | 1.498320459  | 6.79E-22 | 1.47E-20 |
| AL513320.1 | 2.099943579  | -2.331816518 | 7.19E-22 | 1.55E-20 |
| C8orf44    | 1.217425808  | 0.969193436  | 8.66E-22 | 1.87E-20 |
| MESP1      | 1.971166893  | 1.329390787  | 9.20E-22 | 1.98E-20 |
| OTUB2      | 1.568221948  | 1.132720435  | 9.88E-22 | 2.12E-20 |
| SLC7A6     | 1.829822676  | 1.778210411  | 1.02E-21 | 2.18E-20 |
| MT1P3      | -3.401800483 | -2.526609563 | 1.06E-21 | 2.27E-20 |
| GCDH       | -1.302329393 | 6.16894993   | 1.07E-21 | 2.29E-20 |
| MTHFD1L    | 1.503784067  | 3.357772094  | 1.10E-21 | 2.35E-20 |
| RPS6KL1    | 2.017412386  | 2.241495628  | 1.10E-21 | 2.36E-20 |
| SUZ12P1    | 1.200698711  | 1.562332518  | 1.17E-21 | 2.49E-20 |
| NMB        | 2.148816268  | 2.027022998  | 1.20E-21 | 2.56E-20 |
| AC116025.2 | 3.155291369  | -2.76249467  | 1.22E-21 | 2.59E-20 |
| CCDC28B    | 2.35388846   | 2.314003923  | 1.22E-21 | 2.60E-20 |
| SLC38A6    | 1.173530372  | 2.954717994  | 1.24E-21 | 2.63E-20 |
| FAM222A    | 1.734630273  | 3.673719883  | 1.27E-21 | 2.69E-20 |
| NPM1P25    | -1.342140861 | 0.587748329  | 1.29E-21 | 2.72E-20 |
| TCF21      | -1.73976852  | 0.073492001  | 1.34E-21 | 2.84E-20 |
| GABRE      | 2.841046362  | 4.033070007  | 1.41E-21 | 2.99E-20 |
| HHIPL2     | 6.397986188  | 2.066107587  | 1.44E-21 | 3.04E-20 |
| ARL16      | 1.169963318  | 4.201800599  | 1.46E-21 | 3.08E-20 |
| AC105137.2 | 2.073305029  | -2.441608373 | 1.50E-21 | 3.15E-20 |
| CRYBG2     | 2.554128566  | 1.547346983  | 1.50E-21 | 3.16E-20 |
| TUBG1      | 1.075995413  | 4.982285358  | 1.58E-21 | 3.31E-20 |
| ACVR1C     | -1.667580413 | 0.788641266  | 1.58E-21 | 3.31E-20 |
| RTKN2      | 2.857542301  | 0.544481436  | 1.63E-21 | 3.41E-20 |
| GARS-DT    | 1.104882592  | 3.288645734  | 1.63E-21 | 3.41E-20 |
| CLEC12A    | -1.692047367 | -0.096153622 | 1.72E-21 | 3.59E-20 |
| ISX        | 7.091824978  | 2.643726193  | 1.73E-21 | 3.60E-20 |
| THEM5      | 1.752905612  | 1.598054082  | 1.74E-21 | 3.62E-20 |
| AL139089.1 | 1.687399387  | -1.392354619 | 1.74E-21 | 3.63E-20 |
| FOXD2-AS1  | 2.093304997  | 1.663262063  | 1.76E-21 | 3.66E-20 |
| COLCA2     | 2.755313242  | 1.279014967  | 1.92E-21 | 3.99E-20 |
| AC011921.1 | 2.270707756  | -2.745383117 | 2.04E-21 | 4.24E-20 |
| PAQR4      | 2.001297329  | 2.624322854  | 2.08E-21 | 4.30E-20 |
| ANKS3      | 1.056398681  | 3.297303291  | 2.08E-21 | 4.31E-20 |
| LINC01419  | 11.16861331  | 3.47921708   | 2.11E-21 | 4.36E-20 |
| ALG1L      | 3.36059268   | 2.551629168  | 2.12E-21 | 4.38E-20 |
| N4BP3      | 1.987358097  | 0.776085874  | 2.14E-21 | 4.41E-20 |

|             |              |              |          |          |
|-------------|--------------|--------------|----------|----------|
| U73166.1    | 2.167931016  | -1.163831987 | 2.15E-21 | 4.42E-20 |
| MAN1C1      | -1.696091311 | 4.420544667  | 2.18E-21 | 4.48E-20 |
| C8B         | -1.566875574 | 8.477884318  | 2.20E-21 | 4.53E-20 |
| AGTR1       | -1.452145103 | 5.287492515  | 2.32E-21 | 4.76E-20 |
| IQCD        | 2.686179963  | 0.325653288  | 2.56E-21 | 5.24E-20 |
| LRG1        | -1.667093146 | 9.323989066  | 2.56E-21 | 5.24E-20 |
| GOLGA8B     | 1.624934143  | 4.052650046  | 2.58E-21 | 5.28E-20 |
| SLC25A47    | -2.65341485  | 7.416696125  | 2.70E-21 | 5.49E-20 |
| EDIL3       | 2.774372368  | 2.545223307  | 2.79E-21 | 5.68E-20 |
| CASTOR3     | 1.552336266  | 2.648110988  | 2.82E-21 | 5.74E-20 |
| AC084033.3  | 1.637272398  | 1.078027924  | 2.94E-21 | 5.98E-20 |
| GNAO1       | -2.248139572 | 3.53791965   | 2.97E-21 | 6.03E-20 |
| MROH1       | 1.310385803  | 5.158782675  | 2.99E-21 | 6.05E-20 |
| SLC7A2      | -1.709349743 | 7.712940731  | 3.14E-21 | 6.34E-20 |
| RETREG1     | -2.272490971 | 4.355370185  | 3.16E-21 | 6.38E-20 |
| DLG5-AS1    | 2.329067966  | -0.697709144 | 3.26E-21 | 6.59E-20 |
| TTC39A      | 3.141834031  | 3.332957341  | 3.61E-21 | 7.27E-20 |
| APOL6       | -1.120872001 | 6.749646038  | 3.75E-21 | 7.55E-20 |
| PYGB        | 1.410359587  | 6.095872585  | 3.89E-21 | 7.82E-20 |
| SAPCD2      | 2.740694847  | 1.454367374  | 4.16E-21 | 8.36E-20 |
| TRIM16      | 2.965125336  | 3.922933051  | 4.17E-21 | 8.38E-20 |
| SERPINB8    | -1.477795897 | 3.449202072  | 4.26E-21 | 8.53E-20 |
| CCNE2       | 2.109393935  | 0.964744409  | 4.31E-21 | 8.62E-20 |
| FOXD2       | 2.093331302  | 1.150604357  | 4.32E-21 | 8.64E-20 |
| TMEM220-AS1 | -1.4071738   | 2.389594094  | 4.44E-21 | 8.88E-20 |
| HPX         | -1.740477902 | 11.40721629  | 4.50E-21 | 8.99E-20 |
| AL163636.2  | -1.361015323 | 0.242876811  | 4.58E-21 | 9.14E-20 |
| HOXD3       | 3.516846797  | -2.931420622 | 4.70E-21 | 9.36E-20 |
| AL136116.3  | -1.186123466 | 1.780288564  | 4.87E-21 | 9.68E-20 |
| AL731569.1  | 1.467001708  | -0.611276697 | 4.97E-21 | 9.88E-20 |
| ZBED8       | 1.238364498  | 1.391784435  | 4.99E-21 | 9.90E-20 |
| KRT16P2     | -4.441685263 | -1.271104133 | 5.03E-21 | 9.98E-20 |
| ITPKA       | 2.565359737  | 2.890993766  | 5.04E-21 | 9.99E-20 |
| LINC01138   | 1.545773854  | 1.7764446898 | 5.05E-21 | 9.99E-20 |
| AL365181.3  | 3.766552821  | 3.506452155  | 5.11E-21 | 1.01E-19 |
| GINS3       | 1.417844186  | 1.665242797  | 5.11E-21 | 1.01E-19 |
| AC010201.2  | 2.078996311  | -1.468563733 | 5.23E-21 | 1.03E-19 |
| HMGB2       | 1.378975603  | 5.290204746  | 5.25E-21 | 1.04E-19 |
| LINC01703   | 2.354385162  | -0.438459878 | 5.30E-21 | 1.05E-19 |
| LINC00685   | 2.112557474  | -1.559677532 | 5.52E-21 | 1.09E-19 |
| LY6E        | -2.021265743 | 7.411945673  | 5.58E-21 | 1.10E-19 |
| PLG         | -1.707716666 | 10.49521084  | 5.69E-21 | 1.12E-19 |
| PABPC1L     | 1.699674553  | 4.245449449  | 5.69E-21 | 1.12E-19 |
| CDC25A      | 2.128846655  | 1.849111571  | 6.20E-21 | 1.22E-19 |
| MAFG        | 1.296552627  | 4.149340848  | 6.20E-21 | 1.22E-19 |
| TMEM262     | 1.149086844  | -0.554486811 | 6.57E-21 | 1.28E-19 |
| CCDC137     | 1.004053418  | 4.29306204   | 6.58E-21 | 1.29E-19 |
| LEF1        | 3.005263127  | 2.575862274  | 6.62E-21 | 1.29E-19 |
| IL1B        | -1.820399781 | 0.507752676  | 6.70E-21 | 1.31E-19 |
| EME2        | 1.202799251  | 2.652540795  | 6.98E-21 | 1.36E-19 |
| AL132780.5  | 1.82336869   | -2.490682809 | 7.09E-21 | 1.38E-19 |
| SERPINA11   | -1.991763497 | 7.573098348  | 7.17E-21 | 1.39E-19 |
| CSPG5       | 2.513829657  | 0.39539768   | 7.21E-21 | 1.40E-19 |
| ALKBH6      | 1.208723581  | 1.313724081  | 7.43E-21 | 1.44E-19 |
| PHF19       | 1.423187576  | 3.39023848   | 7.47E-21 | 1.44E-19 |
| HID1-AS1    | -1.592080917 | -2.825876841 | 7.52E-21 | 1.45E-19 |
| SIGLEC9     | -1.413994274 | 0.866002978  | 7.55E-21 | 1.46E-19 |
| LAMC1       | 1.373833041  | 6.954678145  | 7.65E-21 | 1.47E-19 |

|            |              |              |          |          |
|------------|--------------|--------------|----------|----------|
| RNF139-AS1 | 1.464551021  | -0.068512812 | 8.01E-21 | 1.54E-19 |
| PEMT       | -1.337293737 | 5.977355689  | 8.34E-21 | 1.60E-19 |
| SMIM14     | -1.08404297  | 7.536923819  | 8.42E-21 | 1.62E-19 |
| MT1E       | -2.595223842 | 7.619156679  | 8.62E-21 | 1.66E-19 |
| ALDH1B1    | -1.338603934 | 7.147279127  | 8.64E-21 | 1.66E-19 |
| AC004816.1 | 2.02864179   | -0.734724124 | 8.72E-21 | 1.67E-19 |
| CENPJ      | 1.257931959  | 2.191099964  | 8.91E-21 | 1.71E-19 |
| AFM        | -1.923905049 | 7.531234869  | 8.96E-21 | 1.72E-19 |
| LINC00853  | 2.404788052  | 0.35128935   | 9.16E-21 | 1.75E-19 |
| DUXAP8     | 3.106639181  | -0.475166982 | 9.38E-21 | 1.79E-19 |
| PVT1       | 2.338434261  | 2.070792969  | 9.71E-21 | 1.85E-19 |
| SNHG20     | 1.169283298  | 1.747632078  | 1.04E-20 | 1.98E-19 |
| NETO2      | 2.260353505  | 1.421901855  | 1.07E-20 | 2.04E-19 |
| STX1A      | 1.549293208  | 1.00184026   | 1.11E-20 | 2.10E-19 |
| CCDC18-AS1 | 1.370419616  | 2.002582162  | 1.11E-20 | 2.11E-19 |
| B3GNTL1    | 1.463485877  | 2.390864446  | 1.15E-20 | 2.19E-19 |
| LINC00355  | 7.270984997  | -1.027324258 | 1.16E-20 | 2.19E-19 |
| JCAD       | 1.75471065   | 4.281091651  | 1.19E-20 | 2.26E-19 |
| NR3C2      | -1.364429263 | 2.916350769  | 1.20E-20 | 2.27E-19 |
| AMD1P4     | -2.623242213 | -0.469139385 | 1.21E-20 | 2.28E-19 |
| ARHGAP39   | 1.535899373  | 1.901353393  | 1.21E-20 | 2.29E-19 |
| F8         | -1.298181562 | 3.796510729  | 1.22E-20 | 2.29E-19 |
| AC093535.2 | -1.084253772 | 0.280044782  | 1.22E-20 | 2.30E-19 |
| IL18R1     | -1.489389538 | 2.187527096  | 1.22E-20 | 2.30E-19 |
| IDNK       | -1.182198794 | 3.956356873  | 1.24E-20 | 2.34E-19 |
| ASIC3      | 1.98643078   | 0.466586809  | 1.24E-20 | 2.34E-19 |
| SMUG1P1    | -3.32975208  | -0.338697828 | 1.26E-20 | 2.36E-19 |
| PODXL      | 1.589945692  | 5.080159669  | 1.29E-20 | 2.42E-19 |
| DGKI       | 2.292124431  | -1.002336369 | 1.30E-20 | 2.43E-19 |
| TLCD1      | 1.610596958  | 3.495004992  | 1.32E-20 | 2.47E-19 |
| PON3       | -1.506519313 | 7.264909213  | 1.32E-20 | 2.47E-19 |
| GINS2      | 1.770924917  | 2.872834987  | 1.42E-20 | 2.65E-19 |
| PPP2R3B    | 1.041897726  | 3.049581693  | 1.43E-20 | 2.66E-19 |
| STRIP2     | 2.634243077  | 1.00505779   | 1.43E-20 | 2.66E-19 |
| HP         | -2.029337452 | 13.29987408  | 1.43E-20 | 2.67E-19 |
| ST3GAL6    | -1.392244583 | 4.757166849  | 1.46E-20 | 2.71E-19 |
| SH3PXD2B   | 1.30065766   | 3.574770727  | 1.50E-20 | 2.78E-19 |
| ZNF767P    | 1.023961326  | 2.045270313  | 1.52E-20 | 2.82E-19 |
| NSD2       | 1.1167698    | 4.882384523  | 1.54E-20 | 2.85E-19 |
| POLE2      | 1.613642955  | 1.977267327  | 1.59E-20 | 2.93E-19 |
| AC007842.1 | 2.115370782  | -0.846907507 | 1.62E-20 | 2.99E-19 |
| SAC3D1     | 1.270879921  | 3.815299608  | 1.62E-20 | 2.99E-19 |
| TMPO-AS1   | 1.637395919  | 1.668932592  | 1.63E-20 | 3.01E-19 |
| SCN4A      | 2.133244073  | 0.712381551  | 1.65E-20 | 3.03E-19 |
| DUSP5      | -1.581223421 | 4.407504725  | 1.68E-20 | 3.09E-19 |
| SERPING1   | -1.227273804 | 11.29079699  | 1.68E-20 | 3.10E-19 |
| NPSR1-AS1  | 6.383854959  | -0.019723047 | 1.78E-20 | 3.27E-19 |
| HSPB1      | 1.632968073  | 8.90079641   | 2.09E-20 | 3.83E-19 |
| AP001469.3 | 1.955651256  | -0.263078241 | 2.15E-20 | 3.94E-19 |
| DDIAS      | 1.567427512  | 0.952355068  | 2.23E-20 | 4.08E-19 |
| ATP11C     | -1.287466936 | 4.769594226  | 2.33E-20 | 4.25E-19 |
| LYPD1      | 4.088008763  | 2.570705807  | 2.37E-20 | 4.32E-19 |
| H2AFX      | 1.44048009   | 4.567581445  | 2.42E-20 | 4.41E-19 |
| PDGFA      | 1.957290811  | 4.389079121  | 2.48E-20 | 4.52E-19 |
| PIMREG     | 3.118287836  | 0.544065567  | 2.55E-20 | 4.63E-19 |
| IGF2BP3    | 4.764523192  | 1.648392592  | 2.65E-20 | 4.81E-19 |
| GPR83      | -1.829499496 | -2.505308477 | 2.68E-20 | 4.86E-19 |
| RNF157     | 2.559583673  | 3.901825225  | 2.70E-20 | 4.91E-19 |

|            |              |              |          |          |
|------------|--------------|--------------|----------|----------|
| KCNMB2-AS1 | 4.668956804  | 0.024695903  | 2.71E-20 | 4.91E-19 |
| LINC02476  | 7.748747119  | -0.180930023 | 2.71E-20 | 4.91E-19 |
| AC099850.3 | 2.633316734  | -0.946942189 | 2.77E-20 | 5.01E-19 |
| AC245100.6 | 7.727889662  | 0.130283198  | 2.79E-20 | 5.04E-19 |
| EFNB3      | -1.926536978 | -0.134092304 | 2.83E-20 | 5.11E-19 |
| LINC00205  | 1.551907536  | 0.636340626  | 2.91E-20 | 5.25E-19 |
| AFAP1-AS1  | 7.132416747  | 2.687150821  | 2.92E-20 | 5.28E-19 |
| PCK1       | -2.205957023 | 9.934917829  | 2.93E-20 | 5.28E-19 |
| STAM-AS1   | 2.217193607  | -2.40294119  | 2.94E-20 | 5.30E-19 |
| HMGA1      | 1.699727879  | 6.158983309  | 2.98E-20 | 5.37E-19 |
| AC023908.3 | 2.045655933  | -2.212669241 | 3.15E-20 | 5.65E-19 |
| AC026362.1 | 1.424061919  | -1.693356482 | 3.31E-20 | 5.93E-19 |
| AC009831.1 | -1.063167848 | -0.747127927 | 3.33E-20 | 5.97E-19 |
| SLC50A1    | 1.222515672  | 6.15517624   | 3.46E-20 | 6.19E-19 |
| JAG2       | 1.673341934  | 3.374043445  | 3.50E-20 | 6.27E-19 |
| TLDC2      | 2.336208158  | 1.248985236  | 3.55E-20 | 6.34E-19 |
| TDRKH-AS1  | 1.776559685  | -1.572344835 | 3.55E-20 | 6.34E-19 |
| AC132872.2 | 2.507160484  | -2.529057418 | 3.60E-20 | 6.42E-19 |
| HGF        | -2.091713136 | 3.493012852  | 3.67E-20 | 6.55E-19 |
| CENPP      | 1.095677576  | 1.331977968  | 3.80E-20 | 6.77E-19 |
| SLC8A1     | -1.339020044 | 1.685788704  | 3.92E-20 | 6.97E-19 |
| TYMS       | 1.783278486  | 4.101028641  | 4.06E-20 | 7.22E-19 |
| BAIAP2L2   | 2.980712438  | 3.497235108  | 4.07E-20 | 7.23E-19 |
| DSTNP2     | 1.118374621  | 1.447762901  | 4.33E-20 | 7.69E-19 |
| ITGA6      | 1.420696753  | 5.827211685  | 4.35E-20 | 7.71E-19 |
| MELTF-AS1  | 2.326392015  | -0.213633505 | 4.37E-20 | 7.73E-19 |
| FAM83H     | 1.451619465  | 6.490451541  | 4.43E-20 | 7.84E-19 |
| RBP7       | 1.994484205  | 3.329397002  | 4.52E-20 | 7.98E-19 |
| ADH4       | -2.37750868  | 9.744922181  | 4.57E-20 | 8.07E-19 |
| NAPSB      | -1.641678057 | 2.117015851  | 4.62E-20 | 8.15E-19 |
| C4orf46    | 1.165371581  | 1.669618995  | 4.65E-20 | 8.18E-19 |
| LEF1-AS1   | 3.74841398   | -2.591194867 | 4.68E-20 | 8.24E-19 |
| GPHN       | -1.215051073 | 4.831291847  | 4.73E-20 | 8.32E-19 |
| LINC02241  | 8.855924683  | 0.545682453  | 4.78E-20 | 8.40E-19 |
| PHLDB2     | -1.013102815 | 4.870618706  | 5.02E-20 | 8.81E-19 |
| NEU1       | 1.155946326  | 6.770459569  | 5.09E-20 | 8.91E-19 |
| RIPOR3     | -2.046351144 | 1.829044758  | 5.14E-20 | 8.99E-19 |
| CRIP3      | 2.127114442  | 2.747826339  | 5.26E-20 | 9.20E-19 |
| AL590666.2 | 3.244140172  | 0.638720452  | 5.36E-20 | 9.38E-19 |
| PITX1      | 5.629102108  | 2.151723644  | 6.06E-20 | 1.06E-18 |
| BRSK1      | 1.765921069  | 1.157248873  | 6.08E-20 | 1.06E-18 |
| CABYR      | 4.254313101  | 2.564001941  | 6.54E-20 | 1.14E-18 |
| GUSBP11    | 1.819809169  | 0.120142947  | 6.68E-20 | 1.16E-18 |
| CSPG4P10   | 1.759713418  | -0.178577881 | 6.86E-20 | 1.19E-18 |
| AC139100.2 | 2.058559004  | -0.835056422 | 6.92E-20 | 1.20E-18 |
| COL4A2     | 1.63603553   | 7.685645598  | 7.05E-20 | 1.22E-18 |
| BICDL1     | 2.256566892  | 3.453193889  | 7.15E-20 | 1.24E-18 |
| SH2D1B     | -1.449326611 | -1.371873747 | 7.16E-20 | 1.24E-18 |
| NKX3-1     | -1.553560042 | 1.156941791  | 7.21E-20 | 1.24E-18 |
| WHRN       | 1.489778516  | 2.861030875  | 7.55E-20 | 1.30E-18 |
| AC010864.1 | 1.619097778  | -1.980477277 | 7.64E-20 | 1.32E-18 |
| LINC01532  | 5.596733618  | -2.037718808 | 7.81E-20 | 1.34E-18 |
| ACOT2      | -1.088811427 | 5.049293631  | 8.09E-20 | 1.39E-18 |
| TFPI2      | -2.016077    | 1.503588518  | 8.37E-20 | 1.44E-18 |
| DMGDH      | -1.602717393 | 6.648307678  | 8.47E-20 | 1.45E-18 |
| EFNA3      | 2.097297065  | 1.447074865  | 8.61E-20 | 1.48E-18 |
| GYS2       | -2.168128334 | 5.815639553  | 8.78E-20 | 1.50E-18 |
| MT-CO1     | -1.080807731 | 14.08304988  | 8.86E-20 | 1.52E-18 |

|             |              |              |          |          |
|-------------|--------------|--------------|----------|----------|
| AC079174.2  | 1.764334511  | -1.079285503 | 8.93E-20 | 1.53E-18 |
| DMD         | -1.288002028 | 5.118110411  | 9.06E-20 | 1.55E-18 |
| LMNB2       | 1.297529833  | 4.52735579   | 9.12E-20 | 1.56E-18 |
| STXBP6      | 1.677796801  | 3.420844385  | 9.26E-20 | 1.58E-18 |
| CITED2      | -1.142139277 | 5.179769338  | 9.30E-20 | 1.58E-18 |
| HS3ST3B1    | -1.532063881 | 5.090831489  | 9.41E-20 | 1.60E-18 |
| P4HA2       | 1.435519603  | 4.937665146  | 9.70E-20 | 1.65E-18 |
| CREG2       | 3.130162633  | -1.942404479 | 9.93E-20 | 1.69E-18 |
| FAM72A      | 1.850170173  | -0.999733658 | 9.97E-20 | 1.69E-18 |
| AL161740.1  | -1.621621223 | -1.232696837 | 1.06E-19 | 1.81E-18 |
| AC011498.7  | 1.603896103  | -0.964597448 | 1.07E-19 | 1.81E-18 |
| NQO1        | 4.786567683  | 7.288152964  | 1.08E-19 | 1.82E-18 |
| ITLN1       | -2.690737539 | -0.228980279 | 1.09E-19 | 1.84E-18 |
| VKORC1      | -1.041878391 | 6.049693884  | 1.09E-19 | 1.85E-18 |
| AC009690.2  | 1.314912216  | -0.151593255 | 1.10E-19 | 1.85E-18 |
| CEP152      | 1.38087451   | 1.209567904  | 1.13E-19 | 1.90E-18 |
| PRRG3       | 2.358221476  | -1.703589728 | 1.13E-19 | 1.90E-18 |
| PSPH        | 1.449870381  | 4.323098402  | 1.19E-19 | 2.00E-18 |
| ZGRF1       | 1.371671393  | 0.959609293  | 1.22E-19 | 2.04E-18 |
| UGP2        | -1.130317734 | 8.169098282  | 1.24E-19 | 2.07E-18 |
| AL158212.3  | 1.506851891  | 0.366397758  | 1.27E-19 | 2.13E-18 |
| NIPAL1      | -1.673836464 | 3.017051005  | 1.29E-19 | 2.16E-18 |
| FEZF1-AS1   | 5.565695092  | 0.03001663   | 1.41E-19 | 2.34E-18 |
| IGSF3       | 2.541067746  | 3.660318502  | 1.46E-19 | 2.43E-18 |
| TEX22       | 2.132665528  | -1.246948875 | 1.50E-19 | 2.50E-18 |
| KMO         | -1.816958673 | 4.714565845  | 1.51E-19 | 2.51E-18 |
| PCNA        | 1.058586547  | 5.860635861  | 1.56E-19 | 2.59E-18 |
| BCL9        | 1.341879982  | 4.145683411  | 1.58E-19 | 2.62E-18 |
| CYTOR       | 1.965224166  | 3.587206048  | 1.62E-19 | 2.69E-18 |
| AL445524.1  | 2.206595635  | 3.541114631  | 1.70E-19 | 2.82E-18 |
| SNHG4       | 2.385862767  | -0.556305594 | 1.76E-19 | 2.92E-18 |
| 3-Sep       | 3.107657288  | 0.3973147    | 1.81E-19 | 3.00E-18 |
| TBX4        | 7.891595443  | 1.222269206  | 1.84E-19 | 3.05E-18 |
| CCDC163     | 1.428954862  | 0.991960986  | 1.86E-19 | 3.06E-18 |
| TPM2        | 1.8878869    | 5.305338343  | 1.96E-19 | 3.23E-18 |
| LINC01537   | -1.512315383 | -1.701759186 | 1.96E-19 | 3.23E-18 |
| MFAP3L      | -1.878834069 | 4.519578187  | 1.99E-19 | 3.28E-18 |
| AC127496.7  | 1.690886596  | -1.160925977 | 2.00E-19 | 3.28E-18 |
| SLC52A2     | 1.393412244  | 4.676116713  | 2.00E-19 | 3.28E-18 |
| SNHG7       | 1.555415428  | 4.57523651   | 2.04E-19 | 3.34E-18 |
| HOXD4       | 4.856158127  | -2.490698844 | 2.05E-19 | 3.35E-18 |
| PSMD4       | 1.07674386   | 7.859499022  | 2.12E-19 | 3.46E-18 |
| PRKAR2A-AS1 | 1.574696214  | 0.332003774  | 2.12E-19 | 3.46E-18 |
| HAGHL       | 2.803808741  | 1.027059153  | 2.20E-19 | 3.58E-18 |
| RIBC2       | 2.942297051  | 0.151184502  | 2.22E-19 | 3.62E-18 |
| MT-ND3      | -1.165212696 | 11.02453258  | 2.24E-19 | 3.65E-18 |
| SNX25P1     | 2.102356287  | -1.213848544 | 2.28E-19 | 3.70E-18 |
| ZSCAN16     | 1.121238247  | 1.723262866  | 2.35E-19 | 3.81E-18 |
| HOXA11-AS   | 5.682790707  | -2.061350698 | 2.37E-19 | 3.84E-18 |
| AC016550.2  | 5.572564746  | -2.693297162 | 2.41E-19 | 3.90E-18 |
| IDUA        | 1.225670178  | 3.901195503  | 2.50E-19 | 4.03E-18 |
| GRHPR       | -1.1917697   | 8.400869504  | 2.51E-19 | 4.04E-18 |
| C5orf46     | 3.755588804  | -0.77882667  | 2.61E-19 | 4.21E-18 |
| PLGLA       | -2.234864412 | 1.5196749    | 2.62E-19 | 4.22E-18 |
| FAM180A     | -2.474729184 | 1.269361635  | 2.63E-19 | 4.24E-18 |
| SLC26A2     | 1.212055394  | 3.010100147  | 2.72E-19 | 4.37E-18 |
| DNMT3B      | 1.689271091  | 1.344884748  | 2.95E-19 | 4.73E-18 |
| RNY4P10     | 1.88200897   | -2.529488774 | 3.14E-19 | 5.03E-18 |

|             |              |              |          |          |
|-------------|--------------|--------------|----------|----------|
| RPS26P47    | -2.104652064 | -2.891563054 | 3.17E-19 | 5.07E-18 |
| EVX1        | 6.685575825  | -1.181859832 | 3.18E-19 | 5.09E-18 |
| SMYD3       | 1.493393432  | 2.598000058  | 3.39E-19 | 5.41E-18 |
| TP53I3      | 1.837981617  | 4.796622913  | 3.39E-19 | 5.42E-18 |
| MAMSTR      | 2.017285525  | 0.309368703  | 3.52E-19 | 5.62E-18 |
| NNMT        | -2.239829285 | 9.312737455  | 3.56E-19 | 5.68E-18 |
| RANBP3L     | -2.233009155 | 1.198488715  | 3.65E-19 | 5.82E-18 |
| AC017083.1  | 1.930395939  | -2.471975978 | 3.77E-19 | 6.00E-18 |
| TM4SF19-AS1 | 1.882510192  | -1.764899225 | 3.86E-19 | 6.13E-18 |
| NCAPD2P1    | 5.416554525  | -1.112290838 | 4.07E-19 | 6.46E-18 |
| AC009148.1  | 2.149981598  | -2.703027857 | 4.29E-19 | 6.79E-18 |
| SRD5A1      | -1.338075464 | 5.689202623  | 4.38E-19 | 6.93E-18 |
| MCM8        | 1.354541766  | 2.83673167   | 4.38E-19 | 6.93E-18 |
| BOP1        | 1.642551539  | 6.18282259   | 4.39E-19 | 6.93E-18 |
| LINC02561   | 3.359141714  | -1.998585313 | 4.54E-19 | 7.16E-18 |
| INKA1       | 1.452915833  | 0.431941708  | 4.62E-19 | 7.30E-18 |
| C20orf96    | 1.010257803  | 2.150628351  | 4.64E-19 | 7.32E-18 |
| AL121832.3  | 2.213547559  | -1.635025702 | 4.67E-19 | 7.35E-18 |
| DUSP10      | -1.14854775  | 5.220416486  | 4.73E-19 | 7.45E-18 |
| SSUH2       | 3.877498904  | 2.293963906  | 4.88E-19 | 7.67E-18 |
| AC099508.2  | -2.380409435 | -1.176051442 | 4.98E-19 | 7.82E-18 |
| TRAF5       | 1.476919004  | 2.576035414  | 5.08E-19 | 7.97E-18 |
| CEP72       | 1.355130755  | 2.298257934  | 5.10E-19 | 7.99E-18 |
| BLNK        | -1.043443866 | 4.423314465  | 5.19E-19 | 8.13E-18 |
| AGXT2       | -1.807294945 | 5.563641928  | 5.35E-19 | 8.37E-18 |
| LRRC37A6P   | 2.908423786  | -0.65530336  | 5.63E-19 | 8.79E-18 |
| DNM3        | 1.551708117  | 0.573231762  | 5.86E-19 | 9.15E-18 |
| STAB1       | -1.127256179 | 5.789105073  | 6.07E-19 | 9.46E-18 |
| AFP         | 6.96218248   | 9.109408127  | 6.09E-19 | 9.49E-18 |
| THBS1       | -1.677093616 | 6.917331137  | 6.13E-19 | 9.54E-18 |
| SFN         | 3.802546176  | 4.758258945  | 6.26E-19 | 9.74E-18 |
| AL121899.1  | 2.284818452  | 0.196192972  | 6.42E-19 | 9.97E-18 |
| CHML        | 1.726691275  | 3.565327651  | 6.52E-19 | 1.01E-17 |
| RNF165      | -1.77973401  | 0.679642376  | 6.75E-19 | 1.05E-17 |
| EBF3        | 2.248013633  | -0.223835629 | 6.82E-19 | 1.06E-17 |
| AC099520.1  | 5.459977444  | -2.981026713 | 7.06E-19 | 1.09E-17 |
| CYB561D1    | 1.195537411  | 2.231930275  | 7.16E-19 | 1.10E-17 |
| FAM72B      | 2.24387953   | -1.212360716 | 7.42E-19 | 1.15E-17 |
| L3MBTL1     | 1.391801701  | 1.151411168  | 7.99E-19 | 1.23E-17 |
| CDCA7       | 3.722449786  | 1.879061502  | 8.18E-19 | 1.26E-17 |
| AC112777.1  | 3.291575228  | -2.100104451 | 8.26E-19 | 1.27E-17 |
| SORL1       | -1.330267635 | 6.613981677  | 8.48E-19 | 1.30E-17 |
| ASIC1       | 3.350965384  | 1.453130578  | 8.53E-19 | 1.31E-17 |
| CTSV        | 4.534524585  | 2.172265933  | 9.07E-19 | 1.39E-17 |
| AL359878.1  | 2.378653633  | -2.506044895 | 9.21E-19 | 1.41E-17 |
| RDH16       | -2.030078654 | 7.723432412  | 9.25E-19 | 1.42E-17 |
| PPT2-EGFL8  | 1.087517854  | -0.480703384 | 9.41E-19 | 1.44E-17 |
| MCAM        | 1.357081988  | 5.562378191  | 9.78E-19 | 1.49E-17 |
| KIAA1614    | 1.834669863  | 0.809829885  | 9.81E-19 | 1.50E-17 |
| SIGLEC1     | -1.38620482  | 3.502272581  | 9.89E-19 | 1.51E-17 |
| AC025171.2  | 1.536203004  | 0.116219244  | 1.00E-18 | 1.52E-17 |
| LINC02585   | 2.250193847  | -2.370566392 | 1.00E-18 | 1.52E-17 |
| PCBP4       | 1.093867648  | 4.477405277  | 1.01E-18 | 1.53E-17 |
| ACSM5       | -1.862497574 | 6.726233577  | 1.03E-18 | 1.56E-17 |
| APOBEC3A    | -1.812721781 | -1.576079231 | 1.05E-18 | 1.59E-17 |
| ADH1A       | -1.793774998 | 8.935858426  | 1.05E-18 | 1.60E-17 |
| TFAP2A-AS1  | 3.953629524  | -1.378916008 | 1.08E-18 | 1.63E-17 |
| CD300A      | -1.292035972 | 2.450354919  | 1.08E-18 | 1.64E-17 |

|             |              |              |          |          |
|-------------|--------------|--------------|----------|----------|
| CYP1A2      | -3.238253937 | 7.131914441  | 1.09E-18 | 1.65E-17 |
| CP          | -1.540977458 | 9.698252973  | 1.12E-18 | 1.69E-17 |
| SBF1        | 1.023161702  | 5.434026122  | 1.13E-18 | 1.71E-17 |
| S100P       | 5.875593235  | 5.799657451  | 1.17E-18 | 1.77E-17 |
| RMI2        | 1.926973944  | 2.570066686  | 1.21E-18 | 1.83E-17 |
| MUC13       | 5.19400767   | 6.91101768   | 1.22E-18 | 1.83E-17 |
| AQP7        | -1.246436324 | 3.479043679  | 1.22E-18 | 1.84E-17 |
| SIRT7       | 1.013976676  | 4.216978393  | 1.23E-18 | 1.85E-17 |
| AC009005.1  | 2.177365258  | 0.022602777  | 1.26E-18 | 1.88E-17 |
| AC108463.1  | 1.844513961  | -2.020416164 | 1.31E-18 | 1.96E-17 |
| ATAT1       | 1.083088613  | 2.601266534  | 1.31E-18 | 1.97E-17 |
| MAGEB17     | 6.597199346  | 0.548683556  | 1.31E-18 | 1.97E-17 |
| LINC00528   | 1.689132324  | 0.248631659  | 1.32E-18 | 1.98E-17 |
| SPOCK1      | 4.469698224  | 2.026182212  | 1.33E-18 | 1.99E-17 |
| AC114316.2  | 4.150682122  | -2.162725719 | 1.39E-18 | 2.08E-17 |
| AC232271.1  | 1.359937008  | -0.37394619  | 1.44E-18 | 2.15E-17 |
| MATN3       | 5.249612023  | 1.760981374  | 1.46E-18 | 2.17E-17 |
| AC048341.2  | 1.629010357  | -1.134002189 | 1.46E-18 | 2.19E-17 |
| AL161668.4  | -1.895483956 | 1.008602534  | 1.49E-18 | 2.22E-17 |
| ORM2        | -1.581603788 | 9.719710432  | 1.58E-18 | 2.36E-17 |
| ACACB       | -1.211305908 | 6.499030549  | 1.63E-18 | 2.43E-17 |
| IGFBP4      | -1.065881402 | 9.843893142  | 1.70E-18 | 2.53E-17 |
| HAAO        | -1.372150558 | 7.235553171  | 1.71E-18 | 2.55E-17 |
| CD1D        | -1.610316992 | 2.755539426  | 1.72E-18 | 2.56E-17 |
| THUMPD3-AS1 | 1.092393541  | 2.914757375  | 1.74E-18 | 2.58E-17 |
| TRIM7       | 2.512190464  | 0.157844206  | 1.74E-18 | 2.58E-17 |
| ZNF581      | 1.210943121  | 3.536619234  | 1.83E-18 | 2.71E-17 |
| FCAR        | -2.036708384 | -2.741142734 | 1.86E-18 | 2.76E-17 |
| MIR3945HG   | -1.774755033 | -2.772024763 | 1.96E-18 | 2.91E-17 |
| SPIRE2      | 1.280593965  | 3.969606231  | 1.98E-18 | 2.93E-17 |
| TMEM81      | 1.030944665  | 1.602987782  | 2.00E-18 | 2.96E-17 |
| SPINK5      | 3.206931124  | 0.644227963  | 2.01E-18 | 2.96E-17 |
| INCENP      | 1.267096203  | 2.969861151  | 2.03E-18 | 2.99E-17 |
| LRRC1       | 2.319392363  | 3.165441387  | 2.03E-18 | 2.99E-17 |
| ADM2        | 2.16574684   | 3.87609286   | 2.03E-18 | 2.99E-17 |
| ACAN        | 3.600902755  | 0.633273684  | 2.09E-18 | 3.08E-17 |
| C6orf48     | 1.207766186  | 5.757581656  | 2.11E-18 | 3.11E-17 |
| UBD         | 2.566710874  | 6.041675396  | 2.14E-18 | 3.14E-17 |
| AC111000.4  | 2.47640509   | 1.397998034  | 2.20E-18 | 3.23E-17 |
| MIP         | -1.679748626 | -1.174162182 | 2.27E-18 | 3.33E-17 |
| HAO2        | -2.372104296 | 6.146779344  | 2.30E-18 | 3.37E-17 |
| AC024230.1  | 5.670860775  | -2.254318282 | 2.33E-18 | 3.41E-17 |
| LINC00634   | 3.548835595  | -2.907731001 | 2.35E-18 | 3.44E-17 |
| RFXANK      | 1.079157214  | 4.745224216  | 2.40E-18 | 3.51E-17 |
| PDIA2       | 6.071041656  | 1.604164696  | 2.43E-18 | 3.54E-17 |
| MEP1A       | 6.535283679  | 2.928007374  | 2.54E-18 | 3.70E-17 |
| MAFA-AS1    | 7.565073695  | -0.754928049 | 2.58E-18 | 3.76E-17 |
| AL138831.3  | 1.792936473  | -1.528063388 | 2.65E-18 | 3.85E-17 |
| AC091987.1  | 5.721055636  | -2.573516642 | 2.67E-18 | 3.89E-17 |
| LINC01004   | 1.36154384   | -0.314565936 | 2.71E-18 | 3.94E-17 |
| DCST1       | 2.193618209  | -1.194916429 | 2.72E-18 | 3.94E-17 |
| RDH5        | -1.527137362 | 3.13331504   | 2.78E-18 | 4.03E-17 |
| PLA2G6      | 1.320976519  | 3.70605776   | 2.79E-18 | 4.04E-17 |
| CXCR2P1     | -1.940087309 | 1.53088455   | 2.80E-18 | 4.05E-17 |
| GC          | -1.24067073  | 11.39402796  | 2.81E-18 | 4.07E-17 |
| CSMD2       | 3.108551438  | 0.528291856  | 2.82E-18 | 4.07E-17 |
| PDLIM7      | 1.233651799  | 4.191174621  | 2.85E-18 | 4.12E-17 |
| OSR2        | 4.142335276  | 0.477720148  | 2.88E-18 | 4.16E-17 |

|            |              |              |          |          |
|------------|--------------|--------------|----------|----------|
| SLC2A5     | 4.295089069  | 2.999763674  | 2.88E-18 | 4.16E-17 |
| ERRFI1     | -1.357738621 | 8.229850089  | 2.89E-18 | 4.16E-17 |
| LPL        | 2.472458382  | 2.066596323  | 2.92E-18 | 4.20E-17 |
| KCNK9      | 6.220914542  | 0.033530936  | 2.97E-18 | 4.27E-17 |
| AC004160.1 | -2.331799026 | -0.145074346 | 2.99E-18 | 4.30E-17 |
| BGLAP      | 1.777963841  | -0.675088773 | 3.15E-18 | 4.53E-17 |
| GSDMC      | 3.854806077  | -0.898223296 | 3.18E-18 | 4.57E-17 |
| AL022322.1 | 1.886774919  | -0.771813581 | 3.20E-18 | 4.59E-17 |
| GLUD1P3    | 1.148434781  | -0.791805105 | 3.21E-18 | 4.60E-17 |
| AC034229.4 | 2.559179523  | -2.90550347  | 3.26E-18 | 4.66E-17 |
| DTX1       | -1.835418995 | 4.39909383   | 3.33E-18 | 4.77E-17 |
| TLX1       | 2.85770512   | 1.664971239  | 3.47E-18 | 4.96E-17 |
| MOGAT2     | -2.237297096 | 5.266832306  | 3.49E-18 | 4.98E-17 |
| SYPL1P2    | 2.363335382  | -2.609079156 | 3.50E-18 | 5.00E-17 |
| FGD1       | 1.381350771  | 2.710928347  | 3.67E-18 | 5.23E-17 |
| MT-ND2     | -1.081727048 | 12.43170791  | 3.77E-18 | 5.36E-17 |
| POU5F1     | 1.980561281  | 0.786775565  | 3.79E-18 | 5.38E-17 |
| SNHG25     | 2.379622491  | 0.339051987  | 3.91E-18 | 5.55E-17 |
| AC078778.1 | 2.056756152  | -1.651436847 | 3.95E-18 | 5.60E-17 |
| LYPD8      | 4.898498015  | 0.222297959  | 4.14E-18 | 5.86E-17 |
| PRND       | 3.924374309  | -0.408746935 | 4.16E-18 | 5.89E-17 |
| SLC22A1    | -2.387903616 | 8.203894945  | 4.19E-18 | 5.93E-17 |
| HIST1H2AM  | 2.433889269  | -2.142695865 | 4.20E-18 | 5.94E-17 |
| ANKRD13B   | 1.697752259  | 1.051848026  | 4.24E-18 | 5.99E-17 |
| GAD1       | 4.6610037    | -0.295272447 | 4.28E-18 | 6.05E-17 |
| PPP1R35    | 1.078526735  | 3.919533476  | 4.29E-18 | 6.05E-17 |
| KIAA0040   | -1.102844008 | 4.302406164  | 4.34E-18 | 6.12E-17 |
| CLN3       | 1.087549697  | 4.989312848  | 4.39E-18 | 6.18E-17 |
| AC097641.2 | 1.76029932   | -2.660935441 | 4.39E-18 | 6.18E-17 |
| DNA2       | 1.371997952  | 1.73691999   | 4.57E-18 | 6.43E-17 |
| AL024498.1 | 1.930773862  | -2.793705135 | 4.62E-18 | 6.50E-17 |
| ARIH2OS    | 1.039181551  | 0.160673921  | 4.71E-18 | 6.61E-17 |
| RBM24      | 2.597254603  | 2.420256498  | 4.74E-18 | 6.66E-17 |
| FGB        | -1.592992717 | 12.90072733  | 4.78E-18 | 6.70E-17 |
| AC003102.1 | 1.559645842  | -0.153020649 | 4.89E-18 | 6.85E-17 |
| MAFF       | -1.251012294 | 4.728028544  | 4.96E-18 | 6.95E-17 |
| PKN3       | 1.419067003  | 3.201954228  | 5.03E-18 | 7.04E-17 |
| GPR158     | 3.398243559  | 1.502276727  | 5.12E-18 | 7.16E-17 |
| LCN2       | 4.709637226  | 7.630631946  | 5.16E-18 | 7.21E-17 |
| SYDE2      | -1.257845107 | 1.075440566  | 5.19E-18 | 7.25E-17 |
| SLITRK6    | -2.848732834 | -1.998594425 | 5.26E-18 | 7.33E-17 |
| TTC39B     | -1.174599314 | 3.181713644  | 5.27E-18 | 7.35E-17 |
| PGC        | 10.50064323  | 6.733405667  | 5.31E-18 | 7.39E-17 |
| WNK4       | 3.715778548  | 2.669998573  | 5.39E-18 | 7.51E-17 |
| NLRP12     | -1.365206383 | -2.57442744  | 5.73E-18 | 7.97E-17 |
| DNMT1      | 1.171082767  | 5.074186916  | 5.75E-18 | 7.99E-17 |
| HIST1H2AI  | 3.530901133  | -2.062524207 | 5.84E-18 | 8.11E-17 |
| TCTEX1D1   | -2.101691707 | 0.491438222  | 5.85E-18 | 8.13E-17 |
| IL33       | -1.625538874 | 3.392143206  | 5.88E-18 | 8.15E-17 |
| CD81       | -1.037795224 | 8.992803979  | 5.88E-18 | 8.15E-17 |
| C9         | -2.61552567  | 8.79931701   | 6.00E-18 | 8.31E-17 |
| CD14       | -1.423048187 | 8.663843796  | 6.14E-18 | 8.48E-17 |
| REEP2      | 3.055191388  | 0.115434783  | 6.22E-18 | 8.58E-17 |
| PRIM1      | 1.283377874  | 2.881652309  | 6.26E-18 | 8.62E-17 |
| STAU2-AS1  | 2.406183515  | -2.421378198 | 6.45E-18 | 8.88E-17 |
| HRAT92     | 2.98960965   | -0.119387913 | 6.50E-18 | 8.95E-17 |
| BMP5       | -2.503716382 | -0.089933425 | 6.53E-18 | 8.97E-17 |
| AZGP1      | -1.577188321 | 9.871561594  | 6.56E-18 | 9.01E-17 |



|             |              |              |          |          |
|-------------|--------------|--------------|----------|----------|
| C1orf162    | -1.230607721 | 2.901268407  | 6.58E-18 | 9.04E-17 |
| AL021707.2  | 1.572869567  | -0.449949744 | 6.62E-18 | 9.09E-17 |
| AC090502.1  | 7.963087409  | 0.74442857   | 6.63E-18 | 9.09E-17 |
| AC011462.4  | 1.923288284  | -2.186975584 | 6.68E-18 | 9.15E-17 |
| EML6        | 2.014620655  | 1.226086602  | 6.68E-18 | 9.15E-17 |
| NANOS1      | 2.642553217  | 0.449968483  | 6.96E-18 | 9.51E-17 |
| CLCN2       | 1.029711276  | 2.644282394  | 7.02E-18 | 9.60E-17 |
| LINC01451   | 3.162500949  | 1.690344337  | 7.03E-18 | 9.61E-17 |
| FAH         | -1.00856432  | 7.528762074  | 7.10E-18 | 9.69E-17 |
| GRAMD1A     | 1.429673249  | 5.308721538  | 7.13E-18 | 9.71E-17 |
| AC110285.7  | 2.030736121  | -0.008972061 | 7.50E-18 | 1.02E-16 |
| CD109       | 2.458322059  | 3.517043657  | 7.90E-18 | 1.07E-16 |
| HCN2        | 3.276237011  | 0.686195968  | 8.11E-18 | 1.10E-16 |
| PDE4C       | 1.912216005  | 0.623619348  | 8.19E-18 | 1.11E-16 |
| MAFA        | 6.535580875  | 1.293476028  | 8.22E-18 | 1.11E-16 |
| DCST2       | 2.065814157  | 0.745642496  | 8.25E-18 | 1.12E-16 |
| MT-ND6      | -1.324612773 | 10.47166377  | 8.29E-18 | 1.12E-16 |
| SNHG3       | 1.665868943  | 3.41034368   | 8.34E-18 | 1.13E-16 |
| AC015908.3  | -1.365223921 | 1.039319477  | 8.43E-18 | 1.14E-16 |
| CSMD1       | 6.446869067  | 1.1825757    | 8.50E-18 | 1.15E-16 |
| AC069544.1  | 1.343587364  | -0.903594395 | 8.56E-18 | 1.16E-16 |
| LINC00628   | 2.701588806  | -2.798916446 | 8.77E-18 | 1.18E-16 |
| TMPRSS2     | -1.294491683 | 5.264169267  | 8.80E-18 | 1.18E-16 |
| HOXD1       | 5.435912338  | -2.051723466 | 8.99E-18 | 1.21E-16 |
| TMEM147-AS1 | 1.209138789  | 1.446637946  | 9.01E-18 | 1.21E-16 |
| DSTYK       | 1.024971338  | 3.354464814  | 9.83E-18 | 1.32E-16 |
| SAA4        | -1.846704632 | 6.840857029  | 1.03E-17 | 1.38E-16 |
| AC073842.2  | 2.229128493  | -2.566009589 | 1.03E-17 | 1.39E-16 |
| TIGD3       | 2.156227987  | -0.228890431 | 1.07E-17 | 1.43E-16 |
| AL117379.1  | 1.622567827  | -1.406146978 | 1.14E-17 | 1.52E-16 |
| DLK2        | 1.944444529  | 0.560716852  | 1.18E-17 | 1.58E-16 |
| AC004540.2  | -2.39257682  | -0.546047966 | 1.19E-17 | 1.59E-16 |
| AC026740.1  | 2.631185638  | -0.126489713 | 1.24E-17 | 1.65E-16 |
| 5-Sep       | 1.972526469  | 2.769200249  | 1.27E-17 | 1.70E-16 |
| RPL23AP7    | 1.046669303  | 0.527040806  | 1.28E-17 | 1.71E-16 |
| HIST1H4H    | 2.586512     | 0.095598062  | 1.32E-17 | 1.76E-16 |
| NCAPG2      | 1.241106762  | 3.427644669  | 1.34E-17 | 1.79E-16 |
| EPPK1       | 3.351951476  | 3.184074054  | 1.35E-17 | 1.79E-16 |
| LINC01121   | 4.203213722  | -2.310409916 | 1.35E-17 | 1.79E-16 |
| KCP         | 2.946851872  | 0.32933305   | 1.39E-17 | 1.84E-16 |
| CCL25       | 6.889079204  | 4.49560121   | 1.40E-17 | 1.86E-16 |
| AC110285.2  | 2.123234856  | 0.97843208   | 1.44E-17 | 1.91E-16 |
| CDH8        | 3.658097171  | -2.069531364 | 1.45E-17 | 1.91E-16 |
| AC013731.1  | 1.924801115  | -1.97593106  | 1.45E-17 | 1.92E-16 |
| MYO1A       | 3.01428481   | 1.522428045  | 1.48E-17 | 1.95E-16 |
| COL2A1      | 9.256576405  | 4.268804616  | 1.53E-17 | 2.02E-16 |
| SEZ6        | 6.939232284  | 2.56186759   | 1.54E-17 | 2.03E-16 |
| QRICH2      | 1.489002127  | 2.153374687  | 1.58E-17 | 2.09E-16 |
| PAFAH1B3    | 1.953187482  | 3.964418377  | 1.60E-17 | 2.11E-16 |
| TIGD7       | 1.162658504  | 0.493660504  | 1.60E-17 | 2.11E-16 |
| BANF2       | 4.934159045  | -2.064515906 | 1.61E-17 | 2.12E-16 |
| GLA         | 1.165561197  | 4.325281643  | 1.65E-17 | 2.17E-16 |
| AC096887.2  | 1.447630583  | 0.166924369  | 1.66E-17 | 2.18E-16 |
| SIPA1L3     | 1.171709289  | 4.538768113  | 1.68E-17 | 2.20E-16 |
| ADH6        | -1.523259893 | 7.979668729  | 1.79E-17 | 2.34E-16 |
| SNHG12      | 1.262714159  | 2.3081636    | 1.91E-17 | 2.50E-16 |
| ADM         | -1.347463592 | 4.327872904  | 1.92E-17 | 2.51E-16 |
| GALNT10     | 1.023170906  | 4.127972388  | 1.93E-17 | 2.52E-16 |

|            |              |              |          |          |
|------------|--------------|--------------|----------|----------|
| AP000553.2 | 2.958068746  | -2.940719429 | 1.95E-17 | 2.54E-16 |
| LINC00665  | 2.804053193  | 2.899382603  | 1.99E-17 | 2.59E-16 |
| NTN4       | -1.270534401 | 3.877570011  | 1.99E-17 | 2.59E-16 |
| AL139412.1 | 2.341186405  | -0.890152941 | 2.03E-17 | 2.64E-16 |
| ATP6V1FNB  | 2.78405641   | -0.25138596  | 2.04E-17 | 2.65E-16 |
| AC068669.1 | 2.652287121  | -2.943084597 | 2.11E-17 | 2.74E-16 |
| SLC30A3    | 4.90667487   | 0.912374885  | 2.11E-17 | 2.74E-16 |
| EPHX4      | 2.60027875   | -1.729383108 | 2.15E-17 | 2.79E-16 |
| SLC19A3    | -1.493492058 | 4.008784409  | 2.22E-17 | 2.87E-16 |
| SMC1B      | 3.714429473  | -0.017387508 | 2.25E-17 | 2.91E-16 |
| AP001412.1 | 1.844606262  | -2.801736095 | 2.25E-17 | 2.91E-16 |
| KCNN3      | 1.50867213   | 1.589259881  | 2.28E-17 | 2.94E-16 |
| AP003352.1 | 1.420480688  | 1.409977043  | 2.35E-17 | 3.04E-16 |
| RPL32P3    | 1.036137471  | 1.691433532  | 2.39E-17 | 3.08E-16 |
| QDPR       | -1.073655917 | 6.88292882   | 2.52E-17 | 3.25E-16 |
| TMEM164    | 1.344563175  | 3.76769941   | 2.59E-17 | 3.34E-16 |
| C19orf48   | 1.313868583  | 5.532609232  | 2.64E-17 | 3.40E-16 |
| MT-ND5     | -1.277885185 | 11.69449196  | 2.71E-17 | 3.48E-16 |
| WDR17      | -1.6980281   | -2.709359291 | 2.86E-17 | 3.67E-16 |
| FNIP2      | -1.26480094  | 5.464974824  | 2.92E-17 | 3.74E-16 |
| FGL2       | -1.292801163 | 4.064994602  | 2.92E-17 | 3.74E-16 |
| TRIM50     | 5.362693307  | 2.480849472  | 2.97E-17 | 3.81E-16 |
| TMCC1-AS1  | 1.571936902  | 0.071985197  | 2.99E-17 | 3.83E-16 |
| PRR7-AS1   | 2.66604746   | -2.504094021 | 3.00E-17 | 3.84E-16 |
| ABHD6      | -1.065887953 | 5.092881572  | 3.03E-17 | 3.87E-16 |
| ATP6V1C1   | 1.000751693  | 6.02599654   | 3.06E-17 | 3.91E-16 |
| SFI1       | 1.270492281  | 3.702342543  | 3.07E-17 | 3.92E-16 |
| AC105118.1 | 7.552404351  | -0.684398153 | 3.08E-17 | 3.93E-16 |
| ZNF572     | 1.412541054  | 0.819705991  | 3.17E-17 | 4.04E-16 |
| AGO2       | 1.01393965   | 4.629773546  | 3.20E-17 | 4.07E-16 |
| INKA2      | 1.212988522  | 2.137160182  | 3.37E-17 | 4.29E-16 |
| CD226      | -1.444713699 | 0.724824914  | 3.49E-17 | 4.43E-16 |
| UGT2B7     | -1.817364646 | 8.42910933   | 3.59E-17 | 4.56E-16 |
| ADRA2C     | 3.303296375  | 2.330025416  | 3.64E-17 | 4.62E-16 |
| UNC119B    | 1.169493693  | 3.649570435  | 3.65E-17 | 4.63E-16 |
| LINC01970  | 3.131303024  | -2.000005845 | 3.66E-17 | 4.64E-16 |
| AC023355.1 | 2.072405438  | -2.17983351  | 3.67E-17 | 4.65E-16 |
| MSX1       | 2.003102965  | 1.026203246  | 3.67E-17 | 4.65E-16 |
| SLC7A8     | -1.459246088 | 2.85431402   | 3.74E-17 | 4.74E-16 |
| GTF2IRD1   | 1.110642363  | 3.572991515  | 3.75E-17 | 4.74E-16 |
| C20orf144  | 2.278699867  | -2.771579146 | 3.75E-17 | 4.74E-16 |
| HERC2P2    | 1.314781568  | 3.406726035  | 3.94E-17 | 4.97E-16 |
| ZFPM2-AS1  | 4.064598881  | 1.363842721  | 3.95E-17 | 4.98E-16 |
| ELFN2      | 3.691437027  | 1.619536479  | 4.05E-17 | 5.10E-16 |
| PFDN6      | 1.038243585  | 5.69534016   | 4.12E-17 | 5.18E-16 |
| LINC01679  | -1.368714607 | -1.003067437 | 4.17E-17 | 5.24E-16 |
| AL365181.2 | 3.744487611  | 1.199620933  | 4.19E-17 | 5.27E-16 |
| PPM1K      | -1.270442634 | 3.203833479  | 4.21E-17 | 5.29E-16 |
| HRCT1      | 2.848351445  | 2.986568574  | 4.27E-17 | 5.36E-16 |
| ARID3C     | -1.578010131 | 1.953014982  | 4.28E-17 | 5.36E-16 |
| FLJ31104   | 2.093046675  | -1.372218453 | 4.31E-17 | 5.40E-16 |
| PROCA1     | 1.499334992  | 0.389970099  | 4.38E-17 | 5.48E-16 |
| NRM        | 1.467797241  | 3.542550876  | 4.42E-17 | 5.53E-16 |
| RSAD2      | -1.654905197 | 2.740584903  | 4.44E-17 | 5.55E-16 |
| AC016737.1 | 2.099188857  | -2.283407681 | 4.46E-17 | 5.58E-16 |
| SLC9A9     | -1.221892612 | 2.032868205  | 4.57E-17 | 5.71E-16 |
| SSX1       | 8.719323811  | 2.962453349  | 4.65E-17 | 5.80E-16 |
| HMGCLL1    | -2.307309312 | -2.051392853 | 4.65E-17 | 5.80E-16 |

|              |              |              |          |          |
|--------------|--------------|--------------|----------|----------|
| AC091133.4   | 4.481533967  | -2.657592679 | 4.90E-17 | 6.11E-16 |
| VASH2        | 2.37093102   | 1.049798509  | 5.08E-17 | 6.32E-16 |
| ZFPM2        | -1.368396537 | 0.882458475  | 5.32E-17 | 6.61E-16 |
| FGF23        | -3.576960484 | -2.238966769 | 5.37E-17 | 6.66E-16 |
| RBL1         | 1.261729005  | 2.29080155   | 5.58E-17 | 6.92E-16 |
| AC112484.3   | 2.178030694  | -0.75688872  | 5.73E-17 | 7.10E-16 |
| ASMTL-AS1    | 1.572731798  | 1.666278547  | 5.73E-17 | 7.10E-16 |
| WISP3        | -1.455485088 | -1.535187623 | 5.78E-17 | 7.15E-16 |
| SULT1C2      | 3.570044225  | 3.918195301  | 5.81E-17 | 7.19E-16 |
| SPINDOC      | 1.20779477   | 2.896790208  | 5.82E-17 | 7.20E-16 |
| YJEFN3       | 1.752678747  | 0.740825538  | 5.85E-17 | 7.24E-16 |
| GRIN2B       | -2.299229855 | 0.103254265  | 6.01E-17 | 7.42E-16 |
| ARID3A       | 2.496812818  | 3.958215936  | 6.19E-17 | 7.62E-16 |
| ASS1P9       | -1.730873209 | -2.603195545 | 6.22E-17 | 7.65E-16 |
| CKAP2        | 1.243089567  | 3.3289574    | 6.24E-17 | 7.67E-16 |
| AC005332.1   | 1.910615809  | -2.799006601 | 6.31E-17 | 7.75E-16 |
| WDYHV1       | 1.128239601  | 3.052126671  | 6.60E-17 | 8.09E-16 |
| AC006252.1   | 1.965646759  | -2.544999553 | 6.91E-17 | 8.46E-16 |
| AC126118.1   | 2.019814461  | -2.721883884 | 7.06E-17 | 8.64E-16 |
| COX7B2       | 8.901193291  | 2.22946428   | 7.35E-17 | 8.99E-16 |
| AL133215.2   | 2.52810576   | -2.549890626 | 7.52E-17 | 9.20E-16 |
| BX842568.4   | -2.121711584 | -1.313738932 | 7.67E-17 | 9.37E-16 |
| AC004890.2   | 1.875427005  | 0.375944448  | 7.75E-17 | 9.46E-16 |
| LINC00894    | 1.582642997  | 0.064949655  | 8.22E-17 | 1.00E-15 |
| AC092535.4   | 1.925773143  | 1.045601954  | 8.30E-17 | 1.01E-15 |
| SLC38A4      | -1.50690939  | 8.230390742  | 8.38E-17 | 1.02E-15 |
| ZEB2         | -1.171108674 | 3.657068651  | 8.41E-17 | 1.02E-15 |
| CASTOR2      | 1.567777028  | -0.177183079 | 8.49E-17 | 1.03E-15 |
| GNG4         | 5.435178304  | 3.271583073  | 8.58E-17 | 1.04E-15 |
| SNCG         | 3.473946833  | 4.434576437  | 8.58E-17 | 1.04E-15 |
| AC022306.2   | 1.357171229  | -0.496315481 | 8.67E-17 | 1.05E-15 |
| GLP2R        | -2.29207625  | -0.925625011 | 8.88E-17 | 1.08E-15 |
| MAPK12       | 2.169482375  | 3.212904723  | 8.92E-17 | 1.08E-15 |
| AP000523.1   | 3.036443742  | -2.608103451 | 9.12E-17 | 1.10E-15 |
| AC012615.1   | 1.280178722  | 0.956772883  | 9.30E-17 | 1.13E-15 |
| RHPN1        | 1.841484852  | 2.66439336   | 9.32E-17 | 1.13E-15 |
| DAPK2        | 1.605659521  | 3.432059864  | 9.47E-17 | 1.14E-15 |
| SLC17A8      | -2.431190978 | -2.246711009 | 9.58E-17 | 1.16E-15 |
| EMX1         | 3.840940757  | 0.651678233  | 9.68E-17 | 1.17E-15 |
| FP671120.4   | -1.743914248 | -0.873260041 | 9.79E-17 | 1.18E-15 |
| CFL1P1       | 1.427082384  | -1.806056539 | 9.84E-17 | 1.19E-15 |
| AL445228.2   | 2.963194662  | -2.787968539 | 1.00E-16 | 1.21E-15 |
| AVPI1        | -1.040228345 | 4.661498069  | 1.01E-16 | 1.21E-15 |
| CKS2         | 1.33116471   | 3.927177057  | 1.04E-16 | 1.25E-15 |
| BCHE         | -1.879405512 | 5.729701473  | 1.05E-16 | 1.26E-15 |
| ZNF296       | 2.15318156   | 0.255970303  | 1.07E-16 | 1.29E-15 |
| DYNC111      | 3.845709984  | 2.382364826  | 1.10E-16 | 1.32E-15 |
| BFSP1        | 1.46659384   | 0.137779612  | 1.10E-16 | 1.32E-15 |
| C1QTNF3      | 4.037580002  | 4.504621516  | 1.12E-16 | 1.34E-15 |
| MKRN3        | 3.962564095  | -0.676973547 | 1.16E-16 | 1.39E-15 |
| HAND2-AS1    | -2.378348675 | 0.348514384  | 1.18E-16 | 1.41E-15 |
| AC024595.1   | 5.831206441  | -2.706025137 | 1.19E-16 | 1.42E-15 |
| ZHX1-C8orf76 | 1.436620334  | 0.103540003  | 1.21E-16 | 1.44E-15 |
| HES6         | 1.402699947  | 2.815626664  | 1.22E-16 | 1.46E-15 |
| SPP1         | 4.284306157  | 9.196720526  | 1.24E-16 | 1.47E-15 |
| ZNF341       | 1.181544976  | 2.417035738  | 1.25E-16 | 1.49E-15 |
| AP003068.4   | 2.82767501   | -0.086786155 | 1.26E-16 | 1.50E-15 |
| ARHGEF26     | -1.277119898 | 4.639012394  | 1.30E-16 | 1.54E-15 |

|            |              |              |          |          |
|------------|--------------|--------------|----------|----------|
| LRRC77P    | 3.102415179  | -1.746935245 | 1.31E-16 | 1.55E-15 |
| SKAP1      | -1.559601067 | 3.196226337  | 1.36E-16 | 1.61E-15 |
| RAB6B      | 1.466978341  | 1.802715573  | 1.38E-16 | 1.64E-15 |
| AVPR1A     | -2.471983493 | 5.015281477  | 1.38E-16 | 1.64E-15 |
| SLC36A1    | 1.023500747  | 2.938971906  | 1.38E-16 | 1.64E-15 |
| LINC01535  | 3.444073031  | -1.530213621 | 1.42E-16 | 1.68E-15 |
| AL031186.1 | 1.550355438  | -2.175321512 | 1.43E-16 | 1.69E-15 |
| LINC00511  | 3.327845026  | 1.868925309  | 1.44E-16 | 1.70E-15 |
| MCM3AP-AS1 | 1.082117207  | 0.292862348  | 1.44E-16 | 1.70E-15 |
| LINC01116  | 3.224917182  | -0.530358285 | 1.45E-16 | 1.71E-15 |
| DQX1       | 5.980100762  | 0.925608383  | 1.48E-16 | 1.75E-15 |
| NAP1L4P1   | 2.927822984  | -0.482960395 | 1.48E-16 | 1.75E-15 |
| SPIC       | -1.860078326 | -2.097191769 | 1.50E-16 | 1.77E-15 |
| GPSM1      | 2.012909707  | 3.554308746  | 1.53E-16 | 1.81E-15 |
| AC009159.3 | -1.26835522  | 0.093900587  | 1.54E-16 | 1.82E-15 |
| ANXA2R     | 1.513102749  | 1.013350389  | 1.57E-16 | 1.84E-15 |
| AC011005.4 | 2.499949846  | -2.256127378 | 1.58E-16 | 1.86E-15 |
| ATP5MC1P4  | 2.689076179  | -2.399383391 | 1.58E-16 | 1.86E-15 |
| FAM86JP    | 1.180751062  | 0.891644569  | 1.60E-16 | 1.87E-15 |
| AL691420.1 | 7.280092076  | -1.491162429 | 1.60E-16 | 1.87E-15 |
| NADK2      | -1.044299336 | 7.628458967  | 1.60E-16 | 1.88E-15 |
| AC103706.1 | 1.8071604    | -0.281216834 | 1.64E-16 | 1.92E-15 |
| PIAS3      | 1.013104891  | 3.348319258  | 1.65E-16 | 1.93E-15 |
| ANXA10     | -1.852292704 | 4.262455725  | 1.67E-16 | 1.96E-15 |
| DOCK3      | 2.574758096  | -0.806149936 | 1.68E-16 | 1.96E-15 |
| BCAS4      | 1.685270815  | 1.939486528  | 1.70E-16 | 1.99E-15 |
| C1QL1      | 3.931585972  | 2.863278656  | 1.73E-16 | 2.02E-15 |
| AC087392.1 | -2.455131523 | -0.158415168 | 1.78E-16 | 2.08E-15 |
| ADGRG6     | -1.32659171  | 5.934988141  | 1.86E-16 | 2.16E-15 |
| MEX3A      | 1.866547196  | 2.482533958  | 1.87E-16 | 2.17E-15 |
| LDHD       | -1.308348477 | 6.520980768  | 1.87E-16 | 2.17E-15 |
| STK24-AS1  | 1.779623311  | -1.799988139 | 1.90E-16 | 2.21E-15 |
| DNASE1L2   | 2.659893516  | -0.200587002 | 1.93E-16 | 2.25E-15 |
| NFAM1      | -1.287832343 | 2.245456691  | 2.04E-16 | 2.37E-15 |
| FUT2       | 2.974645224  | 1.210460161  | 2.06E-16 | 2.39E-15 |
| CWH43      | -2.787413369 | -1.831333039 | 2.11E-16 | 2.45E-15 |
| DCAF13     | 1.02856504   | 5.014441109  | 2.12E-16 | 2.46E-15 |
| GNG12-AS1  | -1.31876375  | -1.036419328 | 2.14E-16 | 2.48E-15 |
| AL138828.1 | 4.437054029  | 0.78743494   | 2.16E-16 | 2.50E-15 |
| CPA6       | 5.741837477  | -0.476578331 | 2.17E-16 | 2.50E-15 |
| C1orf198   | 1.139048007  | 5.543281551  | 2.17E-16 | 2.51E-15 |
| AC005041.3 | 1.656316691  | -1.121360181 | 2.20E-16 | 2.54E-15 |
| AL035461.2 | 1.733457977  | -0.15731378  | 2.25E-16 | 2.59E-15 |
| ACTN2      | 4.743754165  | 3.255712012  | 2.27E-16 | 2.61E-15 |
| MBL2       | -1.83909667  | 6.688765079  | 2.32E-16 | 2.67E-15 |
| RGMA       | 1.912285286  | -0.075390871 | 2.32E-16 | 2.67E-15 |
| RPLP0P2    | 3.051512058  | -0.641440877 | 2.34E-16 | 2.69E-15 |
| A1CF       | -1.003174323 | 7.537151008  | 2.34E-16 | 2.69E-15 |
| SLC6A8     | 2.891659293  | 4.699954157  | 2.36E-16 | 2.71E-15 |
| LINC01833  | 7.199248001  | -0.679512335 | 2.39E-16 | 2.74E-15 |
| CUEDC1     | 1.046695859  | 4.059843391  | 2.43E-16 | 2.79E-15 |
| GNAL       | 2.03240064   | 2.370705723  | 2.51E-16 | 2.88E-15 |
| AC099778.1 | 1.281251778  | -1.090039365 | 2.54E-16 | 2.91E-15 |
| CEL        | 3.226097775  | 0.191137787  | 2.56E-16 | 2.93E-15 |
| DPY19L1P1  | 1.00981895   | 0.222517794  | 2.69E-16 | 3.07E-15 |
| AC117386.2 | 5.149532654  | -1.21689472  | 2.73E-16 | 3.11E-15 |
| COL24A1    | 3.942793452  | -0.089305732 | 2.78E-16 | 3.17E-15 |
| FIBCD1     | 5.641225918  | -0.800032295 | 2.87E-16 | 3.27E-15 |

|            |              |              |          |          |
|------------|--------------|--------------|----------|----------|
| FIRRE      | 3.171712098  | -1.912608966 | 3.05E-16 | 3.46E-15 |
| UROC1      | -2.298252215 | 5.920001491  | 3.12E-16 | 3.54E-15 |
| CISH       | -1.210985289 | 5.182356278  | 3.14E-16 | 3.56E-15 |
| MAGEC2     | 8.566094965  | 2.857245239  | 3.16E-16 | 3.58E-15 |
| AP001453.3 | 1.31111931   | -1.227756068 | 3.17E-16 | 3.59E-15 |
| ZNF580     | 1.119811587  | 3.211029318  | 3.24E-16 | 3.67E-15 |
| AC011447.7 | 2.930418359  | -0.823827363 | 3.25E-16 | 3.68E-15 |
| GOT2       | -1.003392338 | 8.080278231  | 3.28E-16 | 3.71E-15 |
| MYCN       | 3.654240032  | 1.145070613  | 3.32E-16 | 3.75E-15 |
| CTNNA3     | -2.217874829 | 1.270618561  | 3.48E-16 | 3.93E-15 |
| AP006623.1 | 1.603850905  | -0.949858004 | 3.51E-16 | 3.96E-15 |
| WFS1       | 1.008317847  | 5.195892953  | 3.54E-16 | 3.99E-15 |
| DUOX1      | 2.272407269  | 1.676801387  | 3.60E-16 | 4.05E-15 |
| SFRP4      | 2.941742308  | 2.147899161  | 3.61E-16 | 4.06E-15 |
| CYP19A1    | 6.859573394  | 1.357526606  | 3.62E-16 | 4.07E-15 |
| Z97832.2   | 1.621119842  | -1.565517133 | 3.65E-16 | 4.10E-15 |
| HK3        | -1.420575091 | 1.856604435  | 3.73E-16 | 4.19E-15 |
| STRC       | 7.871761989  | 2.111521899  | 3.74E-16 | 4.19E-15 |
| DSCAM      | -2.069493867 | -2.850924011 | 3.82E-16 | 4.29E-15 |
| DKK1       | 5.788251577  | 3.857785147  | 3.85E-16 | 4.31E-15 |
| RPL18P13   | 4.751621582  | -1.821287696 | 3.87E-16 | 4.34E-15 |
| AC068987.1 | 2.225018667  | -2.581843187 | 3.90E-16 | 4.37E-15 |
| PSRC1      | 1.551152962  | 2.15407137   | 3.90E-16 | 4.37E-15 |
| ANKRD23    | 1.154528262  | -0.78987213  | 3.91E-16 | 4.37E-15 |
| STK39      | 1.999440587  | 3.313477198  | 3.93E-16 | 4.39E-15 |
| FOSL1      | -1.692904946 | 0.946116794  | 3.95E-16 | 4.41E-15 |
| B4GALNT2   | 7.250308831  | 1.949987494  | 4.07E-16 | 4.54E-15 |
| DLX5       | 5.285166059  | -1.237992855 | 4.09E-16 | 4.56E-15 |
| REXO5      | 1.377028909  | 2.176904231  | 4.09E-16 | 4.56E-15 |
| LINC00482  | 1.770343362  | 1.862872842  | 4.09E-16 | 4.56E-15 |
| PSAT1      | -1.294715424 | 6.483182285  | 4.37E-16 | 4.85E-15 |
| ADRA1B     | -1.566946776 | 2.026870786  | 4.47E-16 | 4.97E-15 |
| JPT1       | 1.2928025    | 5.425739036  | 4.48E-16 | 4.97E-15 |
| GLDN       | 3.838874289  | 2.081156942  | 4.55E-16 | 5.05E-15 |
| AC022007.1 | 1.310865277  | 0.257535889  | 4.57E-16 | 5.07E-15 |
| AC091057.4 | 2.277734076  | -2.693165445 | 4.58E-16 | 5.08E-15 |
| MFSD2A     | -2.271722939 | 5.975344973  | 4.65E-16 | 5.15E-15 |
| LDLRAD1    | 4.117102187  | 1.453502764  | 4.69E-16 | 5.19E-15 |
| HIST1H3B   | 3.154671444  | -1.630076702 | 4.77E-16 | 5.28E-15 |
| PLEKHG2    | 1.118836023  | 3.66743416   | 4.79E-16 | 5.29E-15 |
| RHO        | 3.551530909  | -2.786397919 | 4.86E-16 | 5.37E-15 |
| AC005393.1 | 2.148910713  | -2.649649515 | 4.91E-16 | 5.41E-15 |
| TM4SF20    | 7.987120829  | 3.276829271  | 4.91E-16 | 5.41E-15 |
| AC087741.1 | 1.312776269  | 1.59891614   | 5.18E-16 | 5.70E-15 |
| TMEM71     | -1.126232141 | -0.563372309 | 5.21E-16 | 5.73E-15 |
| BEST4      | 2.27222944   | -1.309431643 | 5.29E-16 | 5.81E-15 |
| AC096642.1 | 1.713803567  | -1.713524789 | 5.31E-16 | 5.84E-15 |
| AC022211.2 | 1.496615487  | -0.519983601 | 5.52E-16 | 6.06E-15 |
| MYBPC1     | 3.712529925  | -0.749385965 | 5.54E-16 | 6.08E-15 |
| ST6GAL2    | -2.147249884 | 0.468012697  | 5.62E-16 | 6.16E-15 |
| TEX41      | 3.267581047  | 0.929657008  | 5.64E-16 | 6.18E-15 |
| PRRX1      | 2.409180559  | 1.482223044  | 5.68E-16 | 6.22E-15 |
| PHPT1      | 1.202170767  | 6.098562268  | 5.76E-16 | 6.30E-15 |
| TDRKH      | 1.217699382  | 3.318754387  | 5.76E-16 | 6.30E-15 |
| SHMT1      | -1.28674431  | 8.09525506   | 5.79E-16 | 6.33E-15 |
| AL390728.4 | 1.552467987  | 2.669757165  | 5.95E-16 | 6.50E-15 |
| ABCC9      | -1.541840633 | 4.79814536   | 6.07E-16 | 6.63E-15 |
| AP000347.2 | 1.743277919  | -1.177625297 | 6.18E-16 | 6.74E-15 |

|            |              |              |          |          |
|------------|--------------|--------------|----------|----------|
| HAO1       | -1.453009118 | 7.638248306  | 6.18E-16 | 6.74E-15 |
| AL160006.1 | 1.257809696  | 1.534245859  | 6.24E-16 | 6.80E-15 |
| DUSP5P1    | 4.742666784  | -2.827205148 | 6.30E-16 | 6.87E-15 |
| DLG5       | 1.623543527  | 3.80538452   | 6.60E-16 | 7.18E-15 |
| UPK3A      | 5.677676693  | 2.996685419  | 6.66E-16 | 7.24E-15 |
| TSACC      | 1.5639321    | 0.247573828  | 6.73E-16 | 7.30E-15 |
| KCNC1      | 4.935474706  | -1.664885503 | 6.81E-16 | 7.38E-15 |
| AC127024.5 | 1.493469176  | -1.484626848 | 6.92E-16 | 7.49E-15 |
| UGT2B11    | 3.215723367  | 4.758568055  | 6.95E-16 | 7.52E-15 |
| SPARCL1    | 2.768556647  | 7.076279427  | 7.03E-16 | 7.60E-15 |
| LINC01235  | 3.092901372  | -1.053224635 | 7.07E-16 | 7.64E-15 |
| FLVCR1-DT  | 1.602455284  | 1.546856079  | 7.10E-16 | 7.66E-15 |
| UCHL1      | 4.744489925  | 3.583413611  | 7.12E-16 | 7.68E-15 |
| LINC01224  | 4.513110291  | -0.705838052 | 7.17E-16 | 7.73E-15 |
| IBSP       | 6.632646002  | -0.531096592 | 7.18E-16 | 7.73E-15 |
| ETV4       | 2.982192047  | 4.20547647   | 7.27E-16 | 7.82E-15 |
| CHKA       | 1.118836549  | 5.221946796  | 7.40E-16 | 7.96E-15 |
| PI15       | 4.05681933   | 0.926565228  | 7.50E-16 | 8.06E-15 |
| AP003469.4 | 1.473236119  | 1.968993407  | 7.52E-16 | 8.07E-15 |
| TLR3       | -1.180420018 | 2.988016588  | 7.67E-16 | 8.23E-15 |
| FAM167B    | -1.043158756 | 2.411731352  | 7.78E-16 | 8.35E-15 |
| AC093895.1 | 5.182288944  | -1.608598533 | 7.84E-16 | 8.40E-15 |
| VAX2       | 3.338334763  | -1.13977285  | 7.91E-16 | 8.47E-15 |
| SOX12      | 1.384930093  | 4.585056018  | 8.00E-16 | 8.56E-15 |
| HOXA3      | 2.828344456  | 1.32260043   | 8.06E-16 | 8.62E-15 |
| FAM50A     | 1.068763478  | 6.262440944  | 8.36E-16 | 8.93E-15 |
| NES        | 1.257795473  | 5.033667792  | 8.37E-16 | 8.94E-15 |
| AL355388.2 | 2.470571529  | -2.15820377  | 8.47E-16 | 9.04E-15 |
| BRICD5     | 1.390652323  | 0.891319082  | 8.76E-16 | 9.34E-15 |
| CACNB4     | 3.152699544  | -0.093581459 | 8.78E-16 | 9.36E-15 |
| AP003469.2 | 3.862797441  | -2.346064501 | 8.83E-16 | 9.41E-15 |
| THBD       | -1.268247587 | 3.471602407  | 8.84E-16 | 9.42E-15 |
| PLXNC1     | 1.849871205  | 3.87849991   | 8.85E-16 | 9.42E-15 |
| PGP        | 1.13664433   | 4.3231187    | 8.92E-16 | 9.49E-15 |
| TNFRSF25   | 1.514187121  | 2.459647716  | 9.08E-16 | 9.66E-15 |
| CPXM1      | 2.367146281  | 1.447282239  | 9.18E-16 | 9.74E-15 |
| GINS4      | 1.746782906  | 1.346818356  | 9.27E-16 | 9.84E-15 |
| SNX15      | 1.15092401   | -0.929564158 | 9.38E-16 | 9.94E-15 |
| PLXNA1     | 1.299251645  | 4.170652128  | 9.39E-16 | 9.96E-15 |
| AC020978.4 | -1.740055183 | 0.522941452  | 9.45E-16 | 1.00E-14 |
| AL731563.3 | 1.19593216   | -1.066847476 | 9.79E-16 | 1.04E-14 |
| AC005089.1 | 1.784987274  | -0.336531072 | 9.84E-16 | 1.04E-14 |
| HOXD-AS2   | 4.002888646  | -2.074083904 | 1.01E-15 | 1.07E-14 |
| DYDC2      | 3.442043111  | 0.902820869  | 1.01E-15 | 1.07E-14 |
| CYP2C9     | -1.797828125 | 8.873884454  | 1.04E-15 | 1.10E-14 |
| DAND5      | 2.863224966  | -2.515046317 | 1.05E-15 | 1.11E-14 |
| AC011445.2 | 2.586486644  | -1.103201114 | 1.05E-15 | 1.11E-14 |
| LINC01980  | 7.158793678  | 0.413065695  | 1.05E-15 | 1.11E-14 |
| CCDC78     | 2.302296442  | -0.376806825 | 1.06E-15 | 1.11E-14 |
| SERPINF2   | -1.274754116 | 10.25895367  | 1.08E-15 | 1.14E-14 |
| AC233280.1 | 2.324659956  | -2.651611675 | 1.10E-15 | 1.16E-14 |
| SOWAHA     | 1.868215238  | 3.50231181   | 1.12E-15 | 1.17E-14 |
| PLEKHH1    | 1.386518466  | 1.897786313  | 1.12E-15 | 1.18E-14 |
| MTHFD1     | -1.224663586 | 7.980719336  | 1.12E-15 | 1.18E-14 |
| AC005829.1 | 2.095635813  | -1.790310998 | 1.13E-15 | 1.19E-14 |
| STX11      | -1.350570549 | 1.270861837  | 1.14E-15 | 1.20E-14 |
| ACTBP9     | -1.466617762 | -2.347695368 | 1.15E-15 | 1.20E-14 |
| IL17D      | 3.154108441  | 1.119751253  | 1.15E-15 | 1.21E-14 |

|            |              |              |          |          |
|------------|--------------|--------------|----------|----------|
| AC006538.1 | 2.33687244   | -1.534746468 | 1.16E-15 | 1.21E-14 |
| FGA        | -1.386409747 | 13.4978252   | 1.17E-15 | 1.22E-14 |
| OLFML3     | -1.537420517 | 3.443549557  | 1.20E-15 | 1.25E-14 |
| LINC01426  | 2.844345314  | 1.17885735   | 1.20E-15 | 1.26E-14 |
| LINC01287  | 8.584185268  | 2.933194629  | 1.22E-15 | 1.27E-14 |
| PRICKLE4   | 1.524830216  | -2.139151368 | 1.23E-15 | 1.28E-14 |
| PRRT3      | 1.05683654   | 0.624710474  | 1.25E-15 | 1.31E-14 |
| CROCCP3    | 1.139701818  | -0.007035744 | 1.26E-15 | 1.31E-14 |
| GAREM2     | 2.158928317  | 1.152424965  | 1.27E-15 | 1.32E-14 |
| PCDH17     | 1.373965189  | 2.556332358  | 1.29E-15 | 1.34E-14 |
| AL450992.2 | 1.51763109   | 0.997337357  | 1.31E-15 | 1.36E-14 |
| PDZRN4     | -2.282748346 | -1.630940985 | 1.31E-15 | 1.37E-14 |
| MPP3       | 1.876414314  | 1.008527872  | 1.33E-15 | 1.38E-14 |
| AC005785.1 | 1.527314052  | -0.999162332 | 1.37E-15 | 1.42E-14 |
| ANO2       | 3.011104092  | 0.005790892  | 1.37E-15 | 1.42E-14 |
| ADGRA3     | -1.183881287 | 5.72839105   | 1.37E-15 | 1.42E-14 |
| PINK1      | -1.024621334 | 5.158302828  | 1.39E-15 | 1.44E-14 |
| POC1A      | 1.108681894  | 3.233921947  | 1.40E-15 | 1.45E-14 |
| AC132872.1 | 1.243733376  | 0.981370773  | 1.42E-15 | 1.47E-14 |
| FANCC      | -1.055142892 | 4.027984085  | 1.42E-15 | 1.47E-14 |
| SEMA6C     | 1.498152294  | 4.090351776  | 1.45E-15 | 1.50E-14 |
| P3H4       | 1.530258473  | 3.579227192  | 1.48E-15 | 1.53E-14 |
| LOXHD1     | 2.645956559  | -2.434464823 | 1.53E-15 | 1.58E-14 |
| ISL2       | 3.882771983  | -1.314624526 | 1.54E-15 | 1.59E-14 |
| MIOX       | 4.116284067  | 0.089888183  | 1.56E-15 | 1.61E-14 |
| TMEM266    | 2.051444462  | 0.382806588  | 1.57E-15 | 1.62E-14 |
| FBXL19-AS1 | 1.551926354  | 0.176606578  | 1.58E-15 | 1.62E-14 |
| RHBDL1     | 1.634211559  | 1.08984067   | 1.58E-15 | 1.63E-14 |
| AC245128.3 | -1.994514685 | -2.778721927 | 1.58E-15 | 1.63E-14 |
| LINC01194  | 7.118495268  | -1.179251633 | 1.60E-15 | 1.64E-14 |
| RPSAP70    | -1.197560376 | 1.19413297   | 1.61E-15 | 1.65E-14 |
| DEPDC7     | -1.228203713 | 4.677485974  | 1.61E-15 | 1.65E-14 |
| LINC01767  | -1.582340073 | 2.587349254  | 1.67E-15 | 1.72E-14 |
| SPAG5      | 1.342447349  | 4.646249076  | 1.69E-15 | 1.74E-14 |
| FO538757.1 | 1.017738996  | 0.759387438  | 1.71E-15 | 1.75E-14 |
| MPEG1      | -1.13860192  | 4.606793449  | 1.74E-15 | 1.78E-14 |
| SPDYA      | 1.343961218  | -1.564682061 | 1.74E-15 | 1.78E-14 |
| MSS51      | 1.24994481   | -0.455562855 | 1.74E-15 | 1.79E-14 |
| AL078581.1 | -1.110851759 | -2.213766742 | 1.74E-15 | 1.79E-14 |
| HIST2H4A   | 1.999746857  | -1.43408167  | 1.78E-15 | 1.82E-14 |
| RFLNA      | 4.523447661  | 1.207541163  | 1.78E-15 | 1.82E-14 |
| PHACTR3    | -2.162690972 | -2.045406937 | 1.85E-15 | 1.89E-14 |
| RASGRP4    | -1.060929055 | 0.131611696  | 1.87E-15 | 1.91E-14 |
| PELI2      | -1.481142864 | 1.082844341  | 1.92E-15 | 1.95E-14 |
| ALAS1      | -1.241848374 | 8.189352655  | 1.94E-15 | 1.98E-14 |
| KRT16P1    | -3.891403074 | -2.246465145 | 1.96E-15 | 2.00E-14 |
| AC008764.8 | 1.237440089  | -1.42322177  | 1.97E-15 | 2.00E-14 |
| AP000769.1 | 2.600457249  | 0.827758101  | 1.98E-15 | 2.01E-14 |
| TINAG      | 6.995992693  | 2.099434381  | 2.04E-15 | 2.07E-14 |
| AC010331.1 | 1.698779525  | -1.560611716 | 2.07E-15 | 2.10E-14 |
| SYTL5      | -1.633984287 | 0.984958586  | 2.14E-15 | 2.17E-14 |
| ZNF337-AS1 | 1.033583847  | 1.089894411  | 2.15E-15 | 2.17E-14 |
| PES1P1     | 5.91548998   | -2.627995911 | 2.16E-15 | 2.19E-14 |
| DCAF4L2    | 9.374409481  | 3.083262319  | 2.23E-15 | 2.25E-14 |
| MT1H       | -2.932561106 | 5.371614848  | 2.25E-15 | 2.27E-14 |
| TSSK5P     | 2.224086215  | -1.848097359 | 2.26E-15 | 2.29E-14 |
| FAM171A2   | 2.094511751  | 0.291781711  | 2.27E-15 | 2.29E-14 |
| DACH2      | 5.015268181  | -2.270025531 | 2.27E-15 | 2.29E-14 |

|            |              |              |          |          |
|------------|--------------|--------------|----------|----------|
| TMEM150B   | 2.22226307   | 3.228324347  | 2.31E-15 | 2.33E-14 |
| DRP2       | 3.692906886  | -2.656591068 | 2.37E-15 | 2.38E-14 |
| LRRC19     | -2.190720245 | -0.461970735 | 2.44E-15 | 2.45E-14 |
| AL592424.1 | 1.934023983  | -0.653857037 | 2.45E-15 | 2.46E-14 |
| IL10       | -1.580624851 | -1.647165177 | 2.46E-15 | 2.47E-14 |
| AC016394.1 | 1.465070278  | -0.532610043 | 2.52E-15 | 2.52E-14 |
| PROZ       | -1.594941967 | 4.662336003  | 2.53E-15 | 2.54E-14 |
| GPC2       | 2.064245153  | -1.492112616 | 2.57E-15 | 2.57E-14 |
| KCNE5      | 3.117577316  | -0.269108279 | 2.58E-15 | 2.58E-14 |
| AJ003147.3 | 1.612506669  | -2.486880288 | 2.62E-15 | 2.61E-14 |
| ELF3-AS1   | 1.694092126  | 1.023034063  | 2.64E-15 | 2.64E-14 |
| AP000347.1 | 1.518096717  | -0.923722524 | 2.66E-15 | 2.66E-14 |
| LINGO1     | 2.539302549  | 2.727345035  | 2.67E-15 | 2.67E-14 |
| AP003057.1 | -1.528902699 | -2.711223912 | 2.69E-15 | 2.68E-14 |
| SLC9A3     | 4.008927953  | 1.556712211  | 2.70E-15 | 2.69E-14 |
| TDO2       | -1.808812332 | 7.898743361  | 2.74E-15 | 2.73E-14 |
| PRRT2      | 1.579025106  | -0.794764017 | 2.96E-15 | 2.94E-14 |
| ZNF300     | 2.077684974  | 1.178204382  | 3.00E-15 | 2.98E-14 |
| HMOX1      | -1.386484683 | 6.181820416  | 3.00E-15 | 2.98E-14 |
| AC124016.1 | 1.389622063  | -1.961066715 | 3.00E-15 | 2.98E-14 |
| F9         | -1.885682076 | 7.976294962  | 3.01E-15 | 2.99E-14 |
| SLC6A9     | 2.109271734  | 2.206180423  | 3.05E-15 | 3.03E-14 |
| MYO15B     | 1.414960224  | 5.531034002  | 3.05E-15 | 3.03E-14 |
| LINC01011  | 1.069107684  | 0.058743675  | 3.06E-15 | 3.03E-14 |
| RHBDL3     | 4.221043536  | 0.963686789  | 3.07E-15 | 3.04E-14 |
| REG1A      | 10.375688    | 6.898353877  | 3.08E-15 | 3.05E-14 |
| CERS1      | 4.349128677  | -0.403466257 | 3.14E-15 | 3.10E-14 |
| IL1RAPL2   | -2.061741778 | -1.175217873 | 3.17E-15 | 3.13E-14 |
| LRRC69     | 1.930763395  | -0.522657374 | 3.24E-15 | 3.19E-14 |
| RGS5       | 1.435096843  | 5.464650953  | 3.24E-15 | 3.19E-14 |
| ASB9P1     | 3.388257116  | -1.629834015 | 3.26E-15 | 3.21E-14 |
| RET        | -2.240894344 | 1.263686426  | 3.26E-15 | 3.21E-14 |
| LRRC37A3   | 1.394147976  | 1.386957444  | 3.27E-15 | 3.22E-14 |
| ALDH4A1    | -1.071820776 | 8.221400597  | 3.32E-15 | 3.26E-14 |
| DCST1-AS1  | 1.465569749  | 0.4638091    | 3.34E-15 | 3.28E-14 |
| FIGNL1     | 1.10064759   | 2.641627481  | 3.37E-15 | 3.30E-14 |
| AC024560.2 | 2.481691286  | -1.714901555 | 3.41E-15 | 3.34E-14 |
| SERPINA10  | -1.167941722 | 7.954578291  | 3.45E-15 | 3.38E-14 |
| TMEM132A   | 2.485708924  | 3.658362573  | 3.46E-15 | 3.39E-14 |
| SERPINI1   | 1.900093548  | 2.604751678  | 3.46E-15 | 3.39E-14 |
| RAB20      | -1.00560102  | 4.769275901  | 3.47E-15 | 3.39E-14 |
| SPART      | -1.368996151 | 3.092638324  | 3.53E-15 | 3.45E-14 |
| TMEM154    | -1.77523668  | 1.814121901  | 3.54E-15 | 3.46E-14 |
| LINC00893  | 1.442695688  | -0.218457535 | 3.54E-15 | 3.46E-14 |
| ATP2A1-AS1 | 2.277375123  | -1.869591214 | 3.55E-15 | 3.47E-14 |
| LPIN2      | -1.056022094 | 7.504028714  | 3.57E-15 | 3.48E-14 |
| MIR2052HG  | 4.58999011   | -2.389552421 | 3.58E-15 | 3.49E-14 |
| SYN3       | 2.620032189  | -0.621288523 | 3.59E-15 | 3.50E-14 |
| PEX11G     | -1.120697408 | 3.096971553  | 3.60E-15 | 3.51E-14 |
| STEAP1B    | 3.27204996   | -1.75481434  | 3.62E-15 | 3.52E-14 |
| ZNF213     | 1.019604983  | 2.64733199   | 3.62E-15 | 3.52E-14 |
| APOL1      | -1.031851828 | 7.755905064  | 3.65E-15 | 3.55E-14 |
| LINC02365  | 4.538380864  | 1.592859821  | 3.66E-15 | 3.56E-14 |
| BRCA2      | 1.329314964  | 1.489212185  | 3.72E-15 | 3.61E-14 |
| ADH1B      | -1.797736525 | 10.90040659  | 3.77E-15 | 3.65E-14 |
| NEB        | 2.920281188  | 4.197441252  | 3.79E-15 | 3.67E-14 |
| C5AR1      | -1.121799425 | 3.022920753  | 3.88E-15 | 3.76E-14 |
| PHGDH      | -1.517872252 | 6.379695178  | 3.88E-15 | 3.76E-14 |



|            |              |              |          |          |
|------------|--------------|--------------|----------|----------|
| FER1L4     | 2.935341023  | 1.462158759  | 3.99E-15 | 3.86E-14 |
| SEZ6L2     | 3.436289358  | 4.961604239  | 4.05E-15 | 3.91E-14 |
| WNT3A      | 7.761797082  | 1.001239592  | 4.07E-15 | 3.93E-14 |
| F2RL3      | 2.298605471  | 1.870500247  | 4.11E-15 | 3.97E-14 |
| FABP5      | 1.672678631  | 2.50260454   | 4.17E-15 | 4.02E-14 |
| RFC3       | 1.067999951  | 2.902792848  | 4.20E-15 | 4.05E-14 |
| TMCO3      | 1.260155287  | 5.153099059  | 4.21E-15 | 4.06E-14 |
| LINC01611  | 6.334987823  | -2.093556081 | 4.31E-15 | 4.14E-14 |
| LINC02466  | 5.37869922   | -3.035510695 | 4.41E-15 | 4.24E-14 |
| MTMR11     | 1.920547556  | 3.48885236   | 4.48E-15 | 4.31E-14 |
| AC004263.1 | 2.155920606  | -2.485334127 | 4.59E-15 | 4.40E-14 |
| AC016885.3 | 5.920130953  | -1.877295523 | 4.64E-15 | 4.44E-14 |
| FGG        | -1.398959506 | 12.6634294   | 4.64E-15 | 4.44E-14 |
| AC073585.1 | 2.875766837  | -2.489048857 | 4.66E-15 | 4.46E-14 |
| GPD1       | -1.629918369 | 6.460111148  | 4.70E-15 | 4.50E-14 |
| AC098934.1 | 1.841456579  | 2.30871782   | 4.93E-15 | 4.71E-14 |
| DHTKD1     | -1.038055284 | 7.253023272  | 5.02E-15 | 4.79E-14 |
| DCAF4L1    | 2.466715288  | -1.069612477 | 5.09E-15 | 4.86E-14 |
| AC139100.1 | 1.980182726  | -0.588440576 | 5.14E-15 | 4.90E-14 |
| DNASE1     | 1.063950272  | 2.505091104  | 5.18E-15 | 4.94E-14 |
| CDNF       | -1.013090874 | 1.26960229   | 5.30E-15 | 5.05E-14 |
| AL163953.1 | 3.696664832  | -1.939014922 | 5.30E-15 | 5.05E-14 |
| FBXW10     | 4.164086552  | 0.315400277  | 5.31E-15 | 5.05E-14 |
| NECTIN1    | 1.235395875  | 3.936369862  | 5.34E-15 | 5.07E-14 |
| TPBGL      | 3.031780854  | 0.086979631  | 5.37E-15 | 5.10E-14 |
| TRIM16L    | 2.416389952  | 4.47562888   | 5.38E-15 | 5.11E-14 |
| PCSK1      | 6.925349066  | 3.501886558  | 5.47E-15 | 5.19E-14 |
| TRIM54     | 4.305351005  | 0.550040648  | 5.47E-15 | 5.19E-14 |
| WDR97      | 1.539981727  | 0.855362436  | 5.48E-15 | 5.20E-14 |
| AC079061.1 | -2.143822359 | 0.527277811  | 5.49E-15 | 5.20E-14 |
| CXCL2      | -1.571254549 | 5.351356027  | 5.53E-15 | 5.23E-14 |
| AL121658.1 | 1.766368581  | -2.539942036 | 5.53E-15 | 5.24E-14 |
| CYP17A1    | 4.215351551  | 6.034087849  | 5.56E-15 | 5.26E-14 |
| UNC13A     | 3.623255266  | -0.083907745 | 5.61E-15 | 5.31E-14 |
| AL731684.1 | 4.91771819   | -2.225709991 | 5.77E-15 | 5.44E-14 |
| DCAF8L2    | 7.385378573  | -0.971416107 | 5.77E-15 | 5.44E-14 |
| AL162413.1 | 6.692512855  | -1.238441237 | 5.78E-15 | 5.45E-14 |
| DSCR8      | 7.627885065  | 0.432473764  | 5.82E-15 | 5.49E-14 |
| SCG2       | 3.60542462   | -1.454229893 | 5.82E-15 | 5.49E-14 |
| OSBP2      | 1.719616989  | 1.959479389  | 5.92E-15 | 5.57E-14 |
| GOLGA6L9   | 1.180933557  | 0.276261246  | 5.94E-15 | 5.58E-14 |
| TCHH       | -1.697978609 | -1.55679562  | 6.05E-15 | 5.68E-14 |
| TEK        | -1.383468973 | 2.657374314  | 6.06E-15 | 5.69E-14 |
| BOLA2B     | 1.669789582  | -1.028364962 | 6.11E-15 | 5.74E-14 |
| HOXD10     | 4.30269798   | -1.330635109 | 6.30E-15 | 5.91E-14 |
| MSI1       | 3.47579139   | 2.67596246   | 6.33E-15 | 5.93E-14 |
| CCL4       | -1.379861014 | 2.33027092   | 6.39E-15 | 5.99E-14 |
| LINC01186  | 2.797650926  | -1.126003942 | 6.43E-15 | 6.02E-14 |
| ABLIM3     | -1.055610226 | 6.032229945  | 6.51E-15 | 6.09E-14 |
| TKT        | 1.497395701  | 8.068278203  | 6.60E-15 | 6.17E-14 |
| HEY1       | 1.320853681  | 2.387509045  | 6.64E-15 | 6.21E-14 |
| AC011337.1 | 1.620508247  | -2.512418029 | 6.67E-15 | 6.23E-14 |
| FOXF1      | -1.367027093 | 1.027802943  | 6.85E-15 | 6.39E-14 |
| OXLD1      | 1.001881107  | 4.183395154  | 7.14E-15 | 6.66E-14 |
| AC092809.2 | -1.705090683 | -2.265671867 | 7.18E-15 | 6.70E-14 |
| LPAL2      | -1.262316325 | 2.010613359  | 7.25E-15 | 6.75E-14 |
| AL021807.1 | 2.327259364  | -1.621109124 | 7.37E-15 | 6.86E-14 |
| AC245100.4 | 1.492110786  | -0.535358664 | 7.49E-15 | 6.97E-14 |

|            |              |              |          |          |
|------------|--------------|--------------|----------|----------|
| AL358072.1 | 1.686326371  | -2.925047836 | 7.56E-15 | 7.04E-14 |
| LGI1       | -2.510429242 | -2.044098578 | 7.59E-15 | 7.06E-14 |
| PHOSPHO1   | -1.194656012 | -1.922481541 | 7.62E-15 | 7.09E-14 |
| AC145285.6 | 1.263266714  | -1.692654644 | 7.90E-15 | 7.34E-14 |
| AL359313.1 | 5.713081436  | -1.935186236 | 7.95E-15 | 7.39E-14 |
| GNB1L      | 1.013550829  | 2.319579642  | 8.04E-15 | 7.47E-14 |
| NME1       | 1.174307942  | 5.750333588  | 8.17E-15 | 7.58E-14 |
| AC107419.1 | 4.471475436  | -2.305102242 | 8.31E-15 | 7.70E-14 |
| GPR35      | 2.991923943  | 2.214601998  | 8.38E-15 | 7.76E-14 |
| TBX15      | -1.779790676 | 4.239000748  | 8.48E-15 | 7.84E-14 |
| GBP2       | 1.379098848  | 6.305725612  | 8.62E-15 | 7.97E-14 |
| SLC39A10   | 1.257386949  | 3.144324565  | 8.67E-15 | 8.01E-14 |
| RTBDN      | 5.216152022  | -0.791482084 | 8.70E-15 | 8.03E-14 |
| HIST1H3D   | 2.202894997  | -0.667843751 | 8.76E-15 | 8.08E-14 |
| SHLD2P3    | -1.308183146 | 0.102038256  | 8.85E-15 | 8.16E-14 |
| CCDC180    | 1.76366275   | -0.916890266 | 8.85E-15 | 8.16E-14 |
| GIPC2      | -1.296032059 | 3.780423085  | 8.95E-15 | 8.24E-14 |
| HERC5      | -1.3983624   | 3.364626951  | 9.12E-15 | 8.39E-14 |
| AC010300.1 | 1.673680391  | -1.031034616 | 9.21E-15 | 8.48E-14 |
| SLC35E4    | 1.349325022  | 0.800109691  | 9.35E-15 | 8.60E-14 |
| PRR18      | -1.472757755 | 1.994813883  | 9.40E-15 | 8.65E-14 |
| SRRM3      | 3.541509072  | 1.783659795  | 9.82E-15 | 9.01E-14 |
| AC080129.2 | 2.035490525  | -1.65421424  | 9.91E-15 | 9.10E-14 |
| C14orf180  | -2.87354565  | -0.304405938 | 1.02E-14 | 9.33E-14 |
| AC239809.3 | 3.734079849  | -0.100364492 | 1.02E-14 | 9.35E-14 |
| PLPPR4     | 2.818035717  | -0.875040234 | 1.02E-14 | 9.36E-14 |
| LINC00221  | 7.672808834  | 1.380564189  | 1.04E-14 | 9.48E-14 |
| CD200R1    | -1.247027372 | -0.27784756  | 1.04E-14 | 9.56E-14 |
| PCAT6      | 1.605744668  | 0.656396937  | 1.05E-14 | 9.59E-14 |
| AC078909.2 | 2.918155643  | -2.840803313 | 1.05E-14 | 9.59E-14 |
| IGDCC3     | 5.959099197  | 0.229709331  | 1.07E-14 | 9.81E-14 |
| AL355802.2 | 1.596921355  | -1.701882422 | 1.10E-14 | 1.01E-13 |
| ARFGEF3    | 2.952218312  | 2.870815885  | 1.11E-14 | 1.02E-13 |
| REG3A      | 10.52369764  | 8.635738422  | 1.12E-14 | 1.02E-13 |
| SRGN       | -1.122135103 | 5.029462319  | 1.14E-14 | 1.04E-13 |
| AC141557.1 | 2.380394161  | -1.985079891 | 1.17E-14 | 1.07E-13 |
| LINC01234  | 5.698178566  | 0.624486104  | 1.19E-14 | 1.08E-13 |
| LINC01355  | 1.295015577  | 0.915594394  | 1.32E-14 | 1.20E-13 |
| CALN1      | -2.663791648 | -1.990176807 | 1.34E-14 | 1.22E-13 |
| BARD1      | 1.26698617   | 1.727923556  | 1.34E-14 | 1.22E-13 |
| SRD5A2     | -1.996060284 | 4.732287289  | 1.35E-14 | 1.22E-13 |
| AC012409.1 | -1.63479033  | -0.294479361 | 1.36E-14 | 1.23E-13 |
| LINC00942  | 6.975181474  | 1.440448609  | 1.40E-14 | 1.27E-13 |
| ANXA2      | 1.163423807  | 8.141975444  | 1.41E-14 | 1.27E-13 |
| GPR65      | -1.188706217 | 0.918870974  | 1.42E-14 | 1.29E-13 |
| FBXL6      | 1.106054343  | 4.76157341   | 1.43E-14 | 1.29E-13 |
| MPZ        | 2.989587372  | 3.750684315  | 1.43E-14 | 1.30E-13 |
| FBXL22     | 1.140774596  | -0.852886723 | 1.46E-14 | 1.32E-13 |
| CRHR2      | 1.710187562  | -1.566541213 | 1.47E-14 | 1.33E-13 |
| RN7SL2     | -1.136922654 | 4.333140088  | 1.48E-14 | 1.33E-13 |
| IYD        | -1.605026249 | 4.527077702  | 1.48E-14 | 1.34E-13 |
| KCNH4      | 2.254338636  | -1.124909822 | 1.51E-14 | 1.36E-13 |
| NPFFR2     | 6.10626423   | 0.213811582  | 1.51E-14 | 1.36E-13 |
| PRDM7      | 3.332235877  | -2.184156949 | 1.51E-14 | 1.36E-13 |
| DDX11      | 1.238468476  | 3.342202395  | 1.53E-14 | 1.38E-13 |
| AC245060.6 | 1.672024139  | -0.85549793  | 1.56E-14 | 1.40E-13 |
| PRKAR2B    | -1.66606467  | 0.973246099  | 1.58E-14 | 1.42E-13 |
| C8orf76    | 1.010046486  | 3.16767087   | 1.59E-14 | 1.43E-13 |

|              |              |              |          |          |
|--------------|--------------|--------------|----------|----------|
| LUCAT1       | 4.079984525  | 0.452403826  | 1.62E-14 | 1.46E-13 |
| AL035563.1   | 1.445859512  | -1.382583756 | 1.64E-14 | 1.47E-13 |
| PLIN1        | -1.644210246 | 3.398404731  | 1.64E-14 | 1.47E-13 |
| PSMG3        | 1.04108224   | 4.551962495  | 1.64E-14 | 1.47E-13 |
| ACP4         | 4.023293326  | -1.143046084 | 1.66E-14 | 1.49E-13 |
| GOLGA2P7     | 1.703572197  | -1.823115616 | 1.66E-14 | 1.49E-13 |
| AC079466.1   | 6.330618504  | 4.030681876  | 1.67E-14 | 1.49E-13 |
| CATSPER2     | 1.228878704  | 0.41470086   | 1.68E-14 | 1.51E-13 |
| AP002807.1   | 1.596903867  | -0.224043434 | 1.69E-14 | 1.51E-13 |
| FGF14-AS2    | -1.264864953 | 0.851927397  | 1.70E-14 | 1.52E-13 |
| BDKRB1       | 2.713929201  | -0.443762532 | 1.71E-14 | 1.53E-13 |
| PAEP         | 9.414356183  | 3.775237616  | 1.71E-14 | 1.53E-13 |
| PXMP2        | -1.065614103 | 6.104939541  | 1.71E-14 | 1.53E-13 |
| AC010894.3   | 4.619601208  | -0.664741203 | 1.72E-14 | 1.54E-13 |
| ATOH8        | -1.676726277 | 4.10635033   | 1.73E-14 | 1.54E-13 |
| CCDC154      | 1.890230183  | -0.260275733 | 1.75E-14 | 1.56E-13 |
| AC008894.3   | 1.829592204  | -2.193683902 | 1.76E-14 | 1.57E-13 |
| PRR36        | 2.353930258  | 0.873883486  | 1.80E-14 | 1.60E-13 |
| MNS1         | 2.685970006  | 2.288633388  | 1.83E-14 | 1.63E-13 |
| MMS22L       | 1.302864714  | 1.936264113  | 1.85E-14 | 1.65E-13 |
| AC114401.1   | 4.347260679  | -2.669164562 | 1.87E-14 | 1.66E-13 |
| PCK2         | -1.242586369 | 8.796511581  | 1.87E-14 | 1.66E-13 |
| RASGRF1      | 4.110108725  | 1.511980944  | 1.90E-14 | 1.69E-13 |
| AC022107.1   | 1.185425683  | 0.182670799  | 1.96E-14 | 1.74E-13 |
| C1QL4        | 4.071722382  | -1.307942474 | 2.00E-14 | 1.77E-13 |
| ARHGAP27P1-1 | 1.049976718  | 0.571897616  | 2.00E-14 | 1.77E-13 |
| RAP2A        | 1.016631834  | 4.883864367  | 2.01E-14 | 1.78E-13 |
| DLL4         | 1.079775109  | 3.631324739  | 2.01E-14 | 1.78E-13 |
| SNRPEP4      | 1.377935758  | -2.109005676 | 2.03E-14 | 1.80E-13 |
| AC092384.2   | -2.290765321 | -0.230456363 | 2.05E-14 | 1.81E-13 |
| SNHG10       | 1.055895758  | 1.332823089  | 2.09E-14 | 1.84E-13 |
| MAPK11       | 1.402222275  | 2.927254983  | 2.10E-14 | 1.85E-13 |
| KCND3        | -1.904129486 | 4.026031453  | 2.10E-14 | 1.85E-13 |
| DIO2         | 4.362500104  | 1.613887053  | 2.12E-14 | 1.87E-13 |
| CLVS1        | 2.787952902  | -0.632768275 | 2.12E-14 | 1.87E-13 |
| AC074212.1   | 1.40417032   | 0.550787379  | 2.12E-14 | 1.87E-13 |
| AC090809.1   | 6.588374315  | -1.877497396 | 2.17E-14 | 1.91E-13 |
| RELL2        | 1.32231263   | 0.235198294  | 2.20E-14 | 1.94E-13 |
| AP000346.2   | 1.959147479  | -1.279652565 | 2.24E-14 | 1.98E-13 |
| GPR146       | -1.211772832 | 0.861631022  | 2.29E-14 | 2.02E-13 |
| AP000593.3   | 5.297565599  | -0.387590301 | 2.29E-14 | 2.02E-13 |
| PRDM15       | 1.289647874  | 2.871527682  | 2.37E-14 | 2.08E-13 |
| RNU6-8       | 2.035206668  | -1.468474362 | 2.41E-14 | 2.12E-13 |
| PAGE4        | 8.585982249  | 4.673202943  | 2.43E-14 | 2.13E-13 |
| AL078590.3   | -1.579414349 | -1.376127127 | 2.43E-14 | 2.13E-13 |
| SERPINA1     | -1.095396856 | 14.37455089  | 2.44E-14 | 2.14E-13 |
| ZNF618       | 1.044022285  | 3.705439605  | 2.44E-14 | 2.14E-13 |
| CASKIN1      | 3.451670983  | -1.793559935 | 2.50E-14 | 2.19E-13 |
| TSPO2        | 2.150253509  | -0.504036435 | 2.58E-14 | 2.26E-13 |
| SLC7A10      | 6.055067872  | 1.093787087  | 2.59E-14 | 2.26E-13 |
| LIN28B       | 9.452827987  | 1.105429839  | 2.59E-14 | 2.26E-13 |
| FRMD6        | -1.128426798 | 3.287361848  | 2.60E-14 | 2.27E-13 |
| COBLL1       | -1.070966001 | 6.301055695  | 2.61E-14 | 2.28E-13 |
| C11orf80     | 1.246793674  | 2.227749189  | 2.62E-14 | 2.29E-13 |
| RIDA         | -1.234414483 | 8.227010415  | 2.63E-14 | 2.29E-13 |
| FAM133A      | 5.35747057   | 1.570078237  | 2.70E-14 | 2.35E-13 |
| ZNF99        | 4.279738894  | -0.75652576  | 2.71E-14 | 2.36E-13 |
| AKR1D1       | -1.915703179 | 6.317886577  | 2.73E-14 | 2.38E-13 |

|            |              |              |          |          |
|------------|--------------|--------------|----------|----------|
| LINC02313  | 3.470476025  | -2.385380979 | 2.76E-14 | 2.40E-13 |
| AC011503.1 | 4.71725166   | -1.451852901 | 2.77E-14 | 2.41E-13 |
| SASS6      | 1.043721203  | 1.626974303  | 2.77E-14 | 2.41E-13 |
| MCMDC2     | 1.219667804  | 0.55468155   | 2.78E-14 | 2.42E-13 |
| ZNF695     | 4.370333806  | -1.779252339 | 2.81E-14 | 2.44E-13 |
| BNIPL      | 1.677075372  | -0.428376632 | 2.83E-14 | 2.45E-13 |
| MAGEC1     | 8.395651271  | 1.819674134  | 2.83E-14 | 2.46E-13 |
| AC063948.1 | 1.640511175  | -2.68238503  | 2.86E-14 | 2.48E-13 |
| TLL4       | 1.436329376  | 4.330686813  | 2.92E-14 | 2.53E-13 |
| MAGI2-AS3  | -1.683630768 | 3.376766185  | 2.94E-14 | 2.55E-13 |
| AP006621.2 | 2.035843092  | -1.278953165 | 2.95E-14 | 2.56E-13 |
| ALPK3      | 2.047385993  | 3.937936529  | 2.98E-14 | 2.58E-13 |
| CUZD1      | 3.731133198  | 0.284697578  | 3.03E-14 | 2.63E-13 |
| AL117329.1 | 5.305978854  | -2.490874479 | 3.06E-14 | 2.64E-13 |
| PDE1C      | 2.594003209  | -0.157465234 | 3.07E-14 | 2.65E-13 |
| CA2        | -1.34184477  | 5.992193826  | 3.08E-14 | 2.66E-13 |
| EHHADH     | -1.28672317  | 7.827364139  | 3.12E-14 | 2.69E-13 |
| AC116407.4 | 1.512585051  | -2.114327899 | 3.12E-14 | 2.69E-13 |
| AC090192.2 | 5.224917229  | -2.305971721 | 3.17E-14 | 2.73E-13 |
| AC078993.1 | 4.335373354  | -0.185575882 | 3.18E-14 | 2.74E-13 |
| DUSP13     | 5.401362225  | -1.33160013  | 3.19E-14 | 2.75E-13 |
| AC012313.8 | 1.575125256  | -1.925181206 | 3.25E-14 | 2.79E-13 |
| CHGA       | 6.966720762  | 2.149171591  | 3.28E-14 | 2.81E-13 |
| AC073195.1 | 1.329899458  | -1.677021976 | 3.28E-14 | 2.81E-13 |
| AMOTL2     | -1.039809728 | 4.70066969   | 3.35E-14 | 2.88E-13 |
| C8orf59    | 1.006473312  | 4.807507133  | 3.42E-14 | 2.93E-13 |
| LHX2       | -1.733074632 | 0.423008265  | 3.43E-14 | 2.94E-13 |
| CCDC3      | -1.242518449 | 3.850240222  | 3.46E-14 | 2.96E-13 |
| FAM24B     | 2.10231219   | -0.939744572 | 3.65E-14 | 3.12E-13 |
| UNKL       | 1.044792951  | 2.889905718  | 3.67E-14 | 3.13E-13 |
| SPRED3     | 1.820287842  | -0.933752468 | 3.78E-14 | 3.22E-13 |
| SPOCD1     | 2.698516176  | -0.634700583 | 3.80E-14 | 3.24E-13 |
| C7         | -2.066161117 | 6.603581067  | 3.83E-14 | 3.27E-13 |
| CCDC170    | 2.519342477  | 2.935381208  | 3.86E-14 | 3.29E-13 |
| ACTG2      | 1.869169902  | 2.469654524  | 3.90E-14 | 3.32E-13 |
| HIST1H2BG  | 2.175382503  | -0.276739287 | 3.93E-14 | 3.34E-13 |
| TNFSF4     | 1.754744527  | 1.712327195  | 3.95E-14 | 3.36E-13 |
| MYBPHL     | 5.445070419  | -0.848751897 | 3.97E-14 | 3.37E-13 |
| LINC02580  | -1.546057887 | -1.961938667 | 3.97E-14 | 3.37E-13 |
| AC245884.8 | 1.471424184  | -1.612853318 | 3.97E-14 | 3.37E-13 |
| LINC01762  | 2.456035217  | -2.250043478 | 3.99E-14 | 3.39E-13 |
| AC012236.1 | 2.477751108  | 0.55358759   | 4.04E-14 | 3.43E-13 |
| AL133410.1 | 1.808922714  | -2.122448331 | 4.09E-14 | 3.46E-13 |
| CALY       | 4.02488216   | -1.032054278 | 4.12E-14 | 3.49E-13 |
| ZNF681     | 2.135140639  | 0.561682646  | 4.13E-14 | 3.49E-13 |
| LINC02367  | 2.084154759  | -1.760218196 | 4.14E-14 | 3.50E-13 |
| ZNF883     | 2.791572809  | -0.05540384  | 4.17E-14 | 3.52E-13 |
| CRYGS      | 1.96152879   | 1.240971041  | 4.17E-14 | 3.52E-13 |
| FAM81A     | 2.067808902  | -0.019052446 | 4.28E-14 | 3.61E-13 |
| HIST2H2BF  | 2.015634455  | -0.867487165 | 4.34E-14 | 3.65E-13 |
| TRIM60P18  | 1.453631787  | -1.030326612 | 4.37E-14 | 3.68E-13 |
| TAL2       | 2.517219069  | -2.524854481 | 4.38E-14 | 3.69E-13 |
| FAM163B    | -2.326409527 | 0.085631137  | 4.45E-14 | 3.74E-13 |
| ZNF37BP    | 1.035907141  | 2.158402239  | 4.47E-14 | 3.76E-13 |
| RNVU1-6    | 2.225342749  | -2.868770995 | 4.47E-14 | 3.76E-13 |
| DDX53      | 7.237422033  | -0.848795287 | 4.52E-14 | 3.79E-13 |
| C2orf48    | 2.312994645  | -1.884742912 | 4.67E-14 | 3.91E-13 |
| AL359921.2 | 1.213781962  | -0.263218923 | 4.72E-14 | 3.96E-13 |

|             |              |              |          |          |
|-------------|--------------|--------------|----------|----------|
| CYP4F2      | -1.601548244 | 6.847034234  | 4.74E-14 | 3.97E-13 |
| AL031985.3  | 1.030477875  | 0.562980204  | 4.75E-14 | 3.97E-13 |
| BRSK2       | 3.425499487  | -0.055178032 | 4.79E-14 | 4.00E-13 |
| DLX1        | 5.271022152  | -1.026837132 | 4.81E-14 | 4.01E-13 |
| GLUD1       | -1.066988514 | 8.982022449  | 4.84E-14 | 4.04E-13 |
| GAPLINC     | 3.085640741  | -0.206951245 | 4.86E-14 | 4.05E-13 |
| PNMA3       | 3.660625322  | 2.345750475  | 4.87E-14 | 4.06E-13 |
| MCF2L2      | 2.946301087  | -0.002951772 | 4.95E-14 | 4.13E-13 |
| CLDN15      | 1.813469774  | 5.36068728   | 4.98E-14 | 4.15E-13 |
| MIR600HG    | 1.412839996  | 1.003822123  | 5.04E-14 | 4.19E-13 |
| FAXDC2      | -1.151905916 | 6.354174854  | 5.04E-14 | 4.19E-13 |
| ZMIZ1-AS1   | 1.821345653  | -0.186568408 | 5.04E-14 | 4.20E-13 |
| STXBP4      | 1.055907134  | 2.622030205  | 5.04E-14 | 4.20E-13 |
| SERTAD4-AS1 | 2.968581173  | -0.7898393   | 5.09E-14 | 4.23E-13 |
| HIST1H4E    | 2.438723477  | -2.261484436 | 5.17E-14 | 4.29E-13 |
| LRRK2       | -1.215670008 | 2.661832503  | 5.18E-14 | 4.30E-13 |
| AC145343.1  | 1.736393753  | -1.097778837 | 5.28E-14 | 4.39E-13 |
| SLC22A11    | 4.269173157  | 4.088675943  | 5.37E-14 | 4.45E-13 |
| AC011290.2  | 1.606898008  | -2.309050803 | 5.38E-14 | 4.46E-13 |
| HAVCR1      | 5.130786661  | 0.396205109  | 5.49E-14 | 4.55E-13 |
| NCOA7       | -1.063601892 | 5.222331607  | 5.50E-14 | 4.55E-13 |
| CCDC188     | 1.348255195  | -2.20785191  | 5.59E-14 | 4.62E-13 |
| TMEM198     | 1.434502369  | 2.528793655  | 5.60E-14 | 4.63E-13 |
| ALPL        | -1.592554177 | 5.735900805  | 5.68E-14 | 4.69E-13 |
| AC106900.2  | 4.390013666  | -2.487492719 | 5.72E-14 | 4.72E-13 |
| PPIAP77     | 2.321684455  | -1.508121116 | 5.74E-14 | 4.74E-13 |
| HOXC9       | 5.638427218  | -0.576008385 | 5.90E-14 | 4.87E-13 |
| SYP         | 1.785743289  | 1.124883224  | 5.98E-14 | 4.93E-13 |
| AL391056.1  | 4.404649674  | 0.547243867  | 6.12E-14 | 5.04E-13 |
| NR6A1       | 1.256772961  | 2.590242871  | 6.21E-14 | 5.11E-13 |
| FER1L6      | 6.06602826   | 1.01687797   | 6.25E-14 | 5.14E-13 |
| CEND1       | 2.251717793  | -1.993893624 | 6.28E-14 | 5.16E-13 |
| AL390728.6  | 1.292212317  | 1.983205134  | 6.42E-14 | 5.27E-13 |
| NRIP2       | 1.155117889  | 1.370497726  | 6.53E-14 | 5.35E-13 |
| FOLH1       | -1.313332573 | 3.665421438  | 6.57E-14 | 5.39E-13 |
| ITGA2       | 1.970823258  | 2.989110617  | 6.59E-14 | 5.40E-13 |
| LINC02377   | 6.253299803  | -1.638088245 | 6.63E-14 | 5.43E-13 |
| PHEX        | 3.164103958  | -0.270115267 | 6.70E-14 | 5.48E-13 |
| AC007066.2  | 1.067018772  | -0.567268664 | 6.70E-14 | 5.48E-13 |
| AMDHD1      | -1.355839676 | 6.242375356  | 6.72E-14 | 5.50E-13 |
| STEAP4      | -1.68512258  | 4.265391317  | 6.86E-14 | 5.60E-13 |
| LINC01572   | 2.142243512  | -2.353076284 | 6.89E-14 | 5.63E-13 |
| AL353807.3  | 1.288513473  | -1.911915483 | 6.90E-14 | 5.63E-13 |
| UCN2        | 3.883313863  | -2.920585399 | 7.00E-14 | 5.71E-13 |
| AC011498.6  | 1.722210644  | -2.835163377 | 7.02E-14 | 5.73E-13 |
| CCNO        | 3.20245021   | 0.586684269  | 7.03E-14 | 5.73E-13 |
| BX842568.2  | -1.691864802 | 0.24014193   | 7.06E-14 | 5.75E-13 |
| SNX22       | 1.82030535   | 3.400852877  | 7.11E-14 | 5.80E-13 |
| AC034236.2  | 1.041161501  | -0.209846022 | 7.19E-14 | 5.86E-13 |
| LZTS1       | 1.393533057  | 2.14124031   | 7.24E-14 | 5.89E-13 |
| MINCR       | 1.524994274  | 2.088839907  | 7.27E-14 | 5.91E-13 |
| AC012146.1  | 1.550542388  | 1.411284331  | 7.33E-14 | 5.96E-13 |
| HOXA11      | 5.430754035  | -1.729819338 | 7.36E-14 | 5.99E-13 |
| CXCL17      | 4.406397759  | 1.113171013  | 7.63E-14 | 6.19E-13 |
| ADAM11      | 2.285429196  | -0.368595313 | 7.72E-14 | 6.27E-13 |
| TRIM17      | 3.396045351  | -0.667466941 | 7.98E-14 | 6.47E-13 |
| AC138696.2  | 1.532815348  | -0.87719712  | 8.04E-14 | 6.51E-13 |
| SLC34A3     | 3.001550262  | -2.583206367 | 8.21E-14 | 6.64E-13 |

|               |              |              |          |          |
|---------------|--------------|--------------|----------|----------|
| FSD1L         | 1.158835467  | 0.891370812  | 8.44E-14 | 6.83E-13 |
| LINC02428     | -1.967349272 | 2.374088662  | 8.47E-14 | 6.85E-13 |
| LINC01136     | 2.471618479  | -2.10358081  | 8.50E-14 | 6.87E-13 |
| MT-ATP8       | -1.135598572 | 9.087260345  | 8.70E-14 | 7.02E-13 |
| MIR194-2HG    | 1.401410003  | 0.608001792  | 8.70E-14 | 7.02E-13 |
| BRIP1         | 1.415964563  | 2.127495087  | 8.77E-14 | 7.07E-13 |
| AC007639.1    | 4.173672432  | -1.470575341 | 8.77E-14 | 7.07E-13 |
| AP003419.3    | 2.088294568  | -2.219680504 | 8.79E-14 | 7.08E-13 |
| HIST1H2BN     | 1.53039852   | 0.997729977  | 8.83E-14 | 7.11E-13 |
| MTND6P4       | -1.586787402 | -0.448875805 | 8.85E-14 | 7.13E-13 |
| PEG10         | 4.583285942  | 7.339791265  | 8.99E-14 | 7.24E-13 |
| VCX           | 5.837561156  | -1.798810921 | 9.06E-14 | 7.29E-13 |
| LIMK1         | 1.210626811  | 3.919143046  | 9.25E-14 | 7.45E-13 |
| GATM          | -1.197653489 | 9.938974679  | 9.31E-14 | 7.49E-13 |
| GLOD5         | -1.500543484 | 0.819159329  | 9.52E-14 | 7.65E-13 |
| CTD-2201118.1 | 1.791073484  | -0.736727253 | 9.53E-14 | 7.66E-13 |
| ABCB5         | 6.296171811  | 0.281805411  | 9.63E-14 | 7.73E-13 |
| RGS18         | -1.252227919 | -0.037056714 | 9.72E-14 | 7.79E-13 |
| LRRC4C        | -1.723602726 | -1.135052554 | 9.80E-14 | 7.86E-13 |
| AC098820.1    | 1.461875704  | -1.113667986 | 9.90E-14 | 7.93E-13 |
| NKD1          | 3.941694367  | 4.972725768  | 9.94E-14 | 7.96E-13 |
| ALDH3A1       | 5.250784831  | 7.172742975  | 9.96E-14 | 7.97E-13 |
| HCG27         | 1.246677449  | -0.165213632 | 1.00E-13 | 8.03E-13 |
| PFKFB2        | 1.208466802  | 3.57383239   | 1.01E-13 | 8.05E-13 |
| TSPEAR-AS2    | 2.715186615  | 1.211554737  | 1.02E-13 | 8.15E-13 |
| DDX39B        | 1.005889388  | 5.275476673  | 1.03E-13 | 8.24E-13 |
| STRA6         | 3.72234209   | -0.32636991  | 1.05E-13 | 8.35E-13 |
| AC242376.2    | 1.676292829  | -1.097737425 | 1.05E-13 | 8.39E-13 |
| LINC02588     | 5.714879297  | -1.926828499 | 1.05E-13 | 8.40E-13 |
| LINC02335     | 5.540451817  | -2.414912768 | 1.07E-13 | 8.49E-13 |
| HGH1          | 1.04648144   | 5.464885113  | 1.08E-13 | 8.57E-13 |
| SQLE          | 1.629963683  | 6.414247657  | 1.09E-13 | 8.66E-13 |
| FOXH1         | 4.126018097  | -1.373081662 | 1.09E-13 | 8.70E-13 |
| Z97634.1      | 1.327272468  | -1.220184982 | 1.10E-13 | 8.70E-13 |
| RHBDF2        | 1.053354836  | 4.294598968  | 1.10E-13 | 8.74E-13 |
| AC109830.1    | 5.273704904  | -2.8877886   | 1.12E-13 | 8.88E-13 |
| CDK5R1        | 1.27118671   | 0.882869179  | 1.14E-13 | 9.02E-13 |
| LINC01389     | 1.863223996  | -1.291647151 | 1.14E-13 | 9.02E-13 |
| ODAM          | 7.576387904  | 2.471073941  | 1.15E-13 | 9.13E-13 |
| C18orf54      | 1.398518666  | 0.358939808  | 1.16E-13 | 9.17E-13 |
| AC008610.1    | 1.721138653  | -1.412480961 | 1.18E-13 | 9.32E-13 |
| GSEC          | 1.317374322  | 0.698475996  | 1.18E-13 | 9.32E-13 |
| CASP17P       | 1.182741656  | 0.860196026  | 1.18E-13 | 9.37E-13 |
| SLC4A11       | 2.761457872  | 0.78666438   | 1.19E-13 | 9.42E-13 |
| VWF           | 1.547539787  | 6.167814365  | 1.19E-13 | 9.42E-13 |
| AL080317.1    | 1.072475381  | 0.414657534  | 1.19E-13 | 9.44E-13 |
| CMTM4         | 1.271153561  | 3.455250341  | 1.20E-13 | 9.46E-13 |
| AC092910.3    | 1.264989072  | -1.215868352 | 1.20E-13 | 9.47E-13 |
| DPY19L2P2     | 2.020873134  | -1.123053751 | 1.20E-13 | 9.51E-13 |
| LAGE3         | 1.118311256  | 4.438051363  | 1.22E-13 | 9.61E-13 |
| PRAME         | 6.765145168  | 2.989807224  | 1.22E-13 | 9.61E-13 |
| CAMK2N2       | 2.38568629   | 1.08977465   | 1.23E-13 | 9.71E-13 |
| CEMIP         | 2.625283976  | 2.376291418  | 1.25E-13 | 9.88E-13 |
| ECEL1         | 6.43562381   | 3.212757739  | 1.25E-13 | 9.88E-13 |
| RHEBL1        | 1.141149146  | -0.436270559 | 1.26E-13 | 9.93E-13 |
| AC109460.3    | 1.226406343  | -1.282457742 | 1.27E-13 | 1.00E-12 |
| DBN1          | 1.731076209  | 4.539187696  | 1.30E-13 | 1.02E-12 |
| S100A10       | 1.245370456  | 6.950115347  | 1.31E-13 | 1.03E-12 |

|             |              |              |          |          |
|-------------|--------------|--------------|----------|----------|
| FHAD1       | 2.141071654  | -0.413684977 | 1.32E-13 | 1.03E-12 |
| ZNF71       | 1.092876274  | 1.878741777  | 1.33E-13 | 1.05E-12 |
| ATP2A1      | 1.543788645  | -0.295610662 | 1.36E-13 | 1.07E-12 |
| AC006077.2  | 1.614407101  | -1.447758516 | 1.38E-13 | 1.08E-12 |
| PPP4R3C     | 7.943412821  | 0.42112699   | 1.39E-13 | 1.09E-12 |
| C1QTNF6     | 1.188634501  | 4.048752193  | 1.44E-13 | 1.12E-12 |
| ZMYND10     | 1.519344944  | -0.388858933 | 1.45E-13 | 1.14E-12 |
| BPIFA2      | 6.385898093  | -1.399803449 | 1.47E-13 | 1.14E-12 |
| KPNA7       | 2.133047593  | 0.253440872  | 1.49E-13 | 1.16E-12 |
| AC106820.3  | 1.664519285  | -1.514446714 | 1.49E-13 | 1.16E-12 |
| CLEC2L      | 6.514366837  | -0.032742836 | 1.50E-13 | 1.17E-12 |
| TRAM1L1     | 2.951551743  | -0.27762541  | 1.50E-13 | 1.17E-12 |
| ELL3        | 1.177199933  | -1.385263725 | 1.51E-13 | 1.18E-12 |
| COL22A1     | 4.61965561   | 2.216327864  | 1.51E-13 | 1.18E-12 |
| AL671710.1  | 1.097167711  | -0.883365316 | 1.51E-13 | 1.18E-12 |
| AC020904.2  | 1.510822407  | -1.498749381 | 1.51E-13 | 1.18E-12 |
| AC021321.1  | 1.820655957  | -2.803894861 | 1.51E-13 | 1.18E-12 |
| HEXA-AS1    | 1.760467278  | -1.76768844  | 1.52E-13 | 1.18E-12 |
| SLC27A2     | -1.329880942 | 7.336327371  | 1.53E-13 | 1.19E-12 |
| ALPI        | 8.32735974   | 3.358533387  | 1.53E-13 | 1.19E-12 |
| SCML2       | 1.330946994  | 1.57803417   | 1.53E-13 | 1.19E-12 |
| CSKMT       | 1.064771603  | 0.920353501  | 1.55E-13 | 1.21E-12 |
| AL807752.1  | 1.644678104  | -2.396756726 | 1.56E-13 | 1.21E-12 |
| GGT5        | -1.418752278 | 4.80861272   | 1.58E-13 | 1.22E-12 |
| PLCB1       | 1.53776976   | 3.769768808  | 1.60E-13 | 1.24E-12 |
| PFKFB4      | 1.615972185  | 1.862887171  | 1.62E-13 | 1.26E-12 |
| KLF13       | 1.055156119  | 5.78291469   | 1.65E-13 | 1.28E-12 |
| IL6         | -1.964760653 | -0.267970554 | 1.65E-13 | 1.28E-12 |
| AC084018.1  | 1.550276671  | -0.901625939 | 1.69E-13 | 1.30E-12 |
| LINC00906   | 5.375864013  | -2.615089062 | 1.69E-13 | 1.30E-12 |
| BRINP2      | -1.922475705 | -2.812148404 | 1.69E-13 | 1.31E-12 |
| CGREF1      | 1.9599066    | 4.532528906  | 1.70E-13 | 1.31E-12 |
| AC027796.4  | 1.761772084  | -1.182172297 | 1.74E-13 | 1.34E-12 |
| AC007364.1  | -1.218292697 | -1.170907442 | 1.74E-13 | 1.34E-12 |
| LAPTM4B     | 1.542957368  | 6.686041507  | 1.77E-13 | 1.36E-12 |
| DNM1P35     | 1.941250195  | -1.037387633 | 1.80E-13 | 1.38E-12 |
| SLC16A4     | -1.585131619 | 2.108423179  | 1.82E-13 | 1.40E-12 |
| AL160314.2  | 1.564093409  | -2.513392784 | 1.82E-13 | 1.40E-12 |
| GLYAT       | -1.973439573 | 6.551615661  | 1.84E-13 | 1.41E-12 |
| FXYD1       | -1.856207375 | 4.532818883  | 1.84E-13 | 1.41E-12 |
| AC109460.1  | 1.264715251  | -2.276346321 | 1.86E-13 | 1.43E-12 |
| HIST1H3H    | 1.996588731  | 1.661306041  | 1.87E-13 | 1.43E-12 |
| SHBG        | -1.785269524 | 5.213926492  | 1.90E-13 | 1.45E-12 |
| AL591895.1  | 1.166294158  | 1.561396732  | 1.90E-13 | 1.46E-12 |
| KLRD1       | -1.29460048  | 0.892255528  | 1.91E-13 | 1.46E-12 |
| CD69        | -1.388347199 | 1.353019426  | 1.91E-13 | 1.46E-12 |
| SHOX2       | 3.019908646  | -1.305970112 | 1.93E-13 | 1.48E-12 |
| ASPG        | -2.075611282 | 5.261917418  | 1.93E-13 | 1.48E-12 |
| P3H2        | -1.366871119 | 2.086756152  | 1.94E-13 | 1.48E-12 |
| AC087741.3  | 1.38689423   | -1.416486936 | 1.96E-13 | 1.50E-12 |
| MORF4L2-AS1 | 1.260432549  | -1.835448527 | 1.99E-13 | 1.52E-12 |
| CDKN2B      | 1.315575111  | 2.810932678  | 2.00E-13 | 1.52E-12 |
| CBR3        | 1.920981441  | 0.489666738  | 2.09E-13 | 1.59E-12 |
| AL032819.2  | 3.799064436  | -0.577969784 | 2.10E-13 | 1.60E-12 |
| AL121772.1  | 2.086350455  | -1.973955167 | 2.11E-13 | 1.61E-12 |
| AL355987.4  | 2.289044086  | -0.117361643 | 2.13E-13 | 1.62E-12 |
| FBXO32      | 1.669064983  | 3.505604514  | 2.13E-13 | 1.62E-12 |
| DNAH17      | 1.517674426  | 0.391162088  | 2.17E-13 | 1.65E-12 |

|             |              |              |          |          |
|-------------|--------------|--------------|----------|----------|
| HNRNPA1P16  | 1.257962753  | -0.989566678 | 2.18E-13 | 1.66E-12 |
| CKLF        | 1.026968306  | 2.505503025  | 2.19E-13 | 1.66E-12 |
| LINC01943   | 1.713881246  | -1.111172415 | 2.21E-13 | 1.68E-12 |
| ZNF607      | 1.563015516  | 1.177693612  | 2.22E-13 | 1.68E-12 |
| GLP1R       | 6.208448946  | -0.988616778 | 2.23E-13 | 1.69E-12 |
| BAGE2       | 6.715562273  | -1.337245567 | 2.27E-13 | 1.72E-12 |
| PKN1        | 1.0448284    | 6.620142803  | 2.30E-13 | 1.74E-12 |
| LAMA3       | 2.312951351  | 4.665591879  | 2.33E-13 | 1.77E-12 |
| SLC9A3-AS1  | 2.111365114  | 3.406118325  | 2.34E-13 | 1.77E-12 |
| MT-ND4L     | -1.19467861  | 9.630082693  | 2.35E-13 | 1.78E-12 |
| ACOX2       | -1.141415747 | 6.752282394  | 2.36E-13 | 1.79E-12 |
| SP5         | 2.502369924  | 3.201205692  | 2.39E-13 | 1.80E-12 |
| AC009533.1  | 1.148552702  | 1.332473931  | 2.44E-13 | 1.85E-12 |
| AC112178.1  | 5.981069288  | -1.965467956 | 2.45E-13 | 1.85E-12 |
| AC008870.2  | 1.212483701  | -1.75569007  | 2.49E-13 | 1.88E-12 |
| AC023090.1  | 5.11120084   | -1.855660187 | 2.50E-13 | 1.88E-12 |
| GRPR        | 4.04282365   | -0.037962676 | 2.53E-13 | 1.91E-12 |
| TSPAN7      | -1.069058799 | 3.649141022  | 2.54E-13 | 1.91E-12 |
| ADGRB3      | -1.901477588 | -1.617552229 | 2.57E-13 | 1.93E-12 |
| E2F5        | 1.163943734  | 2.258420743  | 2.66E-13 | 2.00E-12 |
| AL356234.2  | 3.426461972  | -1.313754945 | 2.77E-13 | 2.08E-12 |
| PAQR6       | 1.560089344  | 1.056561124  | 2.81E-13 | 2.10E-12 |
| AC002116.2  | 1.433513542  | -1.849018455 | 2.89E-13 | 2.16E-12 |
| PPP1R14D    | 4.143296055  | -0.269650843 | 2.90E-13 | 2.17E-12 |
| KIRREL2     | 7.680110915  | 1.638082426  | 2.91E-13 | 2.18E-12 |
| AC012358.2  | 1.014564355  | -0.664265874 | 2.91E-13 | 2.18E-12 |
| AFF2        | 4.772302864  | 0.259117998  | 2.94E-13 | 2.20E-12 |
| MEGF10      | -1.915002803 | -1.735702506 | 2.96E-13 | 2.21E-12 |
| ZP3         | 1.606141831  | 0.929820461  | 2.98E-13 | 2.23E-12 |
| AC108748.1  | -1.628534067 | -2.593029791 | 3.05E-13 | 2.28E-12 |
| CCER2       | 1.749776136  | -1.089857841 | 3.07E-13 | 2.29E-12 |
| FAM198A     | -1.852681819 | 2.208261011  | 3.08E-13 | 2.29E-12 |
| AC009509.4  | -1.185502793 | -2.370755491 | 3.10E-13 | 2.31E-12 |
| HES2        | 3.008029026  | -0.42561269  | 3.11E-13 | 2.32E-12 |
| FANCA       | 1.02269283   | 2.883559156  | 3.13E-13 | 2.33E-12 |
| NKX3-2      | 4.387354863  | -2.103469255 | 3.18E-13 | 2.36E-12 |
| AC114786.2  | 5.552172743  | -0.250451203 | 3.19E-13 | 2.37E-12 |
| TMEM82      | -1.749689319 | 4.30304702   | 3.19E-13 | 2.37E-12 |
| PALM2-AKAP2 | -1.576053158 | -1.063508585 | 3.19E-13 | 2.37E-12 |
| LINC02323   | 3.904413276  | -2.151057277 | 3.19E-13 | 2.37E-12 |
| ZNF385D     | 3.881626941  | 2.110730745  | 3.21E-13 | 2.38E-12 |
| IGHA1       | -2.014399991 | 6.931554753  | 3.23E-13 | 2.40E-12 |
| IGDCC4      | 3.100271532  | 0.227105686  | 3.29E-13 | 2.44E-12 |
| SPATC1      | 1.571953821  | -1.501048069 | 3.29E-13 | 2.44E-12 |
| CYP2W1      | 2.840016305  | -1.250789368 | 3.32E-13 | 2.47E-12 |
| TMEM136     | 1.34252746   | 1.372357534  | 3.33E-13 | 2.47E-12 |
| KAZN        | -1.507231265 | 1.527576615  | 3.40E-13 | 2.52E-12 |
| SPSB1       | -1.014774798 | 5.488874111  | 3.41E-13 | 2.53E-12 |
| SERPINH1    | 1.076304527  | 6.43927945   | 3.42E-13 | 2.53E-12 |
| MIR4664     | 2.099461045  | -1.471690507 | 3.43E-13 | 2.54E-12 |
| MAGEB2      | 9.160161946  | 1.350188817  | 3.50E-13 | 2.59E-12 |
| INHA        | 4.719195772  | 1.015897015  | 3.51E-13 | 2.60E-12 |
| GABARAPL1   | -1.068566657 | 6.558427978  | 3.56E-13 | 2.63E-12 |
| AL139023.1  | 5.249252572  | -2.298614698 | 3.57E-13 | 2.64E-12 |
| AC138393.1  | 1.071183392  | 0.555143119  | 3.60E-13 | 2.66E-12 |
| CEACAM20    | 5.076078903  | 1.263056853  | 3.63E-13 | 2.68E-12 |
| ANKRD34A    | 1.094131322  | -0.729875835 | 3.78E-13 | 2.79E-12 |
| TEAD2       | 1.375855445  | 4.128290777  | 3.79E-13 | 2.80E-12 |



|            |              |              |          |          |
|------------|--------------|--------------|----------|----------|
| PLXNA3     | 1.401795917  | 3.701994224  | 3.80E-13 | 2.80E-12 |
| ZG16       | -1.76959438  | 3.814241506  | 3.84E-13 | 2.83E-12 |
| AC147055.1 | 3.399642533  | -0.326253483 | 3.86E-13 | 2.84E-12 |
| KCNJ5      | 2.132885657  | 2.319345839  | 3.89E-13 | 2.87E-12 |
| AL590705.1 | 2.478078226  | -1.170770699 | 3.90E-13 | 2.87E-12 |
| MAGEA6     | 8.034788856  | 2.746311864  | 3.90E-13 | 2.87E-12 |
| AC011468.1 | 1.334321308  | -0.521399864 | 3.93E-13 | 2.89E-12 |
| AKAP3      | -1.314332476 | -0.608762331 | 3.97E-13 | 2.92E-12 |
| AC245100.3 | 9.155204532  | 1.669372283  | 4.03E-13 | 2.96E-12 |
| SYT3       | 4.765292094  | 1.057637645  | 4.08E-13 | 3.00E-12 |
| DNER       | 6.919057195  | 1.58336803   | 4.09E-13 | 3.00E-12 |
| PNMA5      | 6.613654643  | 1.544179996  | 4.10E-13 | 3.01E-12 |
| RFPL4B     | 7.321581684  | -0.101729538 | 4.11E-13 | 3.02E-12 |
| AC002128.1 | 1.39947334   | -1.853768502 | 4.19E-13 | 3.07E-12 |
| LINC01748  | 5.098273794  | -1.598085346 | 4.23E-13 | 3.10E-12 |
| ACTL8      | 7.383032085  | 0.83188223   | 4.23E-13 | 3.10E-12 |
| AC100803.3 | 1.995977984  | -1.892758348 | 4.27E-13 | 3.12E-12 |
| AL135999.1 | 1.313124737  | 0.827929374  | 4.27E-13 | 3.13E-12 |
| FER1L5     | 2.70968402   | -1.746772189 | 4.28E-13 | 3.13E-12 |
| PSCA       | 3.902464243  | -1.050626765 | 4.39E-13 | 3.20E-12 |
| ASPDH      | -1.603022396 | 5.691855297  | 4.43E-13 | 3.24E-12 |
| HMGA2      | 5.836678958  | 1.423707707  | 4.49E-13 | 3.28E-12 |
| LINC01126  | 1.801968665  | -1.87556866  | 4.49E-13 | 3.28E-12 |
| F11        | -1.207884267 | 6.019885636  | 4.54E-13 | 3.31E-12 |
| ODF3L1     | -1.494530764 | -0.68670622  | 4.61E-13 | 3.36E-12 |
| AL080317.3 | 1.269480898  | 0.064085312  | 4.63E-13 | 3.37E-12 |
| LINC01667  | 7.600398992  | 0.261819792  | 4.67E-13 | 3.40E-12 |
| RNF24      | 1.006608937  | 2.80763225   | 4.72E-13 | 3.43E-12 |
| HOXC6      | 4.635706737  | -1.027540728 | 4.72E-13 | 3.43E-12 |
| MIR25      | 1.537819641  | -2.175060535 | 4.74E-13 | 3.45E-12 |
| AL138847.2 | -1.316522965 | 2.982863804  | 4.76E-13 | 3.46E-12 |
| GJA5       | 1.513679671  | 2.764516962  | 4.77E-13 | 3.47E-12 |
| GADD45G    | -1.376195703 | 6.261262194  | 4.78E-13 | 3.47E-12 |
| FBN3       | 3.465494979  | 1.14448931   | 4.85E-13 | 3.53E-12 |
| DPYD       | -1.010890172 | 5.581472492  | 4.87E-13 | 3.54E-12 |
| AL136537.2 | 6.198181609  | -1.988442306 | 4.90E-13 | 3.56E-12 |
| ANKRD65    | 2.485296815  | 2.719674562  | 4.93E-13 | 3.58E-12 |
| STMND1     | 3.192694806  | -0.085992069 | 4.95E-13 | 3.59E-12 |
| AQP7P3     | -1.947101073 | -2.623583947 | 5.02E-13 | 3.64E-12 |
| MYMX       | 3.173826708  | -1.267857026 | 5.02E-13 | 3.64E-12 |
| STRA8      | 3.897226776  | -2.072806353 | 5.03E-13 | 3.64E-12 |
| TNNC1      | 3.028817607  | 1.335266479  | 5.11E-13 | 3.70E-12 |
| AL109933.4 | -1.58665414  | -2.280020308 | 5.13E-13 | 3.71E-12 |
| SLC45A4    | 1.980313015  | 3.15352262   | 5.14E-13 | 3.72E-12 |
| PABPC4L    | 1.441443172  | -1.164251394 | 5.21E-13 | 3.76E-12 |
| PCDHGA1    | 2.36938658   | -0.561264056 | 5.33E-13 | 3.85E-12 |
| AC106822.1 | -1.841646991 | -2.240466849 | 5.34E-13 | 3.86E-12 |
| HAO2-IT1   | -2.11684884  | -2.641786299 | 5.44E-13 | 3.92E-12 |
| GOLGA2P5   | 1.253776586  | 3.662032368  | 5.45E-13 | 3.93E-12 |
| STEAP3-AS1 | -1.394114407 | -2.300945278 | 5.54E-13 | 3.99E-12 |
| KCNQ3      | 2.074939984  | -0.951214027 | 5.74E-13 | 4.13E-12 |
| ADCY10P1   | 1.24206742   | 1.13382296   | 5.76E-13 | 4.14E-12 |
| PTOV1-AS2  | 1.077183774  | 0.394566128  | 5.80E-13 | 4.17E-12 |
| LINC01612  | -3.10010094  | -1.368239807 | 5.95E-13 | 4.28E-12 |
| AC027601.1 | 1.075483696  | -0.54280904  | 5.98E-13 | 4.29E-12 |
| BFSP2      | 2.919711154  | -1.954741693 | 5.99E-13 | 4.30E-12 |
| FRRS1L     | 5.377385042  | 0.813046518  | 6.03E-13 | 4.33E-12 |
| APLP1      | 2.936723575  | 1.895590273  | 6.09E-13 | 4.37E-12 |

|             |              |              |          |          |
|-------------|--------------|--------------|----------|----------|
| AKR1B10     | 3.613498433  | 8.99727795   | 6.11E-13 | 4.38E-12 |
| CCSAP       | 1.028558134  | 2.872263739  | 6.17E-13 | 4.42E-12 |
| FAP         | 2.362225375  | 1.126801922  | 6.26E-13 | 4.48E-12 |
| AKR1C7P     | 2.15892694   | -1.420100392 | 6.27E-13 | 4.49E-12 |
| ESCO2       | 1.645470905  | 1.010653839  | 6.28E-13 | 4.49E-12 |
| CPNE7       | 2.700353764  | 1.431184271  | 6.33E-13 | 4.53E-12 |
| SMPD5       | 1.855153835  | -1.318343129 | 6.36E-13 | 4.55E-12 |
| PFN1P11     | 4.206943681  | 0.694101628  | 6.37E-13 | 4.55E-12 |
| CYP4A22-AS1 | 1.923802256  | -2.842506871 | 6.46E-13 | 4.61E-12 |
| ANKFN1      | 8.225446171  | 2.053108196  | 6.47E-13 | 4.62E-12 |
| DPPA4       | -1.905371705 | -2.181867584 | 6.55E-13 | 4.68E-12 |
| ZNF530      | 1.123268988  | 0.879558124  | 6.60E-13 | 4.70E-12 |
| ARHGAP22    | 1.402005681  | 0.603341564  | 6.71E-13 | 4.78E-12 |
| TGFBR3      | -1.140039609 | 4.617494306  | 6.74E-13 | 4.80E-12 |
| TECTA       | -1.082945638 | -0.250996508 | 6.74E-13 | 4.80E-12 |
| TPSP2       | 2.159974554  | 0.63783858   | 6.96E-13 | 4.95E-12 |
| MFGE8       | 1.188052743  | 4.490600767  | 7.07E-13 | 5.02E-12 |
| AC005253.1  | 1.107067565  | -1.045252907 | 7.15E-13 | 5.08E-12 |
| DIRAS1      | 3.498310209  | 0.409380991  | 7.16E-13 | 5.08E-12 |
| PCDHB2      | 2.914215242  | 0.31422127   | 7.18E-13 | 5.09E-12 |
| STC2        | 2.042768996  | 3.218537109  | 7.26E-13 | 5.15E-12 |
| AL118511.2  | 3.352890997  | -2.73065218  | 7.44E-13 | 5.27E-12 |
| TCAM1P      | 4.740001437  | -1.106382278 | 7.66E-13 | 5.42E-12 |
| DMC1        | 2.290180516  | -1.210461592 | 7.68E-13 | 5.43E-12 |
| C9orf163    | 1.392381515  | -1.681008107 | 7.83E-13 | 5.53E-12 |
| DPF1        | 2.372212399  | -2.32569603  | 7.84E-13 | 5.53E-12 |
| CFAP53      | 1.36799938   | -0.73530981  | 7.87E-13 | 5.56E-12 |
| TBKBP1      | 1.053143567  | 2.705333609  | 7.90E-13 | 5.57E-12 |
| AC122688.3  | 1.629445824  | -1.31848519  | 7.92E-13 | 5.59E-12 |
| ASNSP1      | 6.331150083  | -0.369479717 | 7.96E-13 | 5.61E-12 |
| DTNA        | 1.744621978  | 3.97670749   | 8.10E-13 | 5.70E-12 |
| AC006486.2  | 1.378082646  | -1.723584483 | 8.21E-13 | 5.77E-12 |
| HIST1H3E    | 1.689010013  | -0.694478277 | 8.23E-13 | 5.79E-12 |
| FLJ12825    | 2.777622069  | -2.552583766 | 8.32E-13 | 5.85E-12 |
| LRRC10B     | 1.678007816  | -1.127474012 | 8.39E-13 | 5.89E-12 |
| AC005225.4  | -1.088705969 | 0.424692731  | 8.39E-13 | 5.89E-12 |
| POPDC3      | 6.205152955  | -0.041381889 | 8.43E-13 | 5.92E-12 |
| ANKRD29     | 1.690945226  | 2.89335679   | 8.44E-13 | 5.92E-12 |
| ZNRD1ASP    | 1.079768771  | 1.048287691  | 8.50E-13 | 5.96E-12 |
| FTCD        | -1.401308183 | 8.456931532  | 8.52E-13 | 5.97E-12 |
| PKM         | 1.801386568  | 7.235732256  | 8.59E-13 | 6.01E-12 |
| VSIG10L     | 2.072734816  | 3.026305254  | 8.70E-13 | 6.09E-12 |
| CNTD1       | 1.014297439  | -0.524996028 | 8.75E-13 | 6.12E-12 |
| KCNN1       | 2.547740605  | -1.436153315 | 8.84E-13 | 6.18E-12 |
| ENO3        | -1.627970485 | 5.312359621  | 8.95E-13 | 6.25E-12 |
| ALS2CL      | 1.395000573  | 4.754953525  | 8.97E-13 | 6.26E-12 |
| ACTBP11     | 1.872200212  | -2.214156242 | 9.02E-13 | 6.30E-12 |
| UGT2B10     | -1.613472522 | 7.842617301  | 9.14E-13 | 6.38E-12 |
| VAMP1       | 1.039829816  | 2.378474653  | 9.24E-13 | 6.44E-12 |
| UNC5A       | 2.814039639  | -0.353856274 | 9.33E-13 | 6.50E-12 |
| CRLF1       | 2.609867051  | 1.320238954  | 9.40E-13 | 6.55E-12 |
| AC025171.4  | 1.608184963  | -1.67160323  | 9.41E-13 | 6.55E-12 |
| EIF4E3      | -1.166042675 | 3.320572838  | 9.81E-13 | 6.82E-12 |
| SNORA60     | 1.583996568  | -2.91480349  | 9.83E-13 | 6.83E-12 |
| AL031673.1  | 1.233101319  | -0.365496529 | 9.88E-13 | 6.87E-12 |
| AC007773.1  | 1.68541063   | -0.702257453 | 1.01E-12 | 7.01E-12 |
| OR2B6       | 2.236514766  | -1.965678431 | 1.03E-12 | 7.13E-12 |
| KCNU1       | 7.38770004   | 1.579012193  | 1.03E-12 | 7.14E-12 |

|               |              |              |          |          |
|---------------|--------------|--------------|----------|----------|
| C19orf57      | 1.346756558  | 1.169893419  | 1.05E-12 | 7.26E-12 |
| KDM4A-AS1     | 1.1670169    | -0.476609702 | 1.05E-12 | 7.26E-12 |
| CARD18        | 5.156403335  | -2.696217483 | 1.05E-12 | 7.30E-12 |
| LINC01719     | 1.574497069  | 0.17187485   | 1.09E-12 | 7.55E-12 |
| AC091182.1    | 2.170105848  | -1.243131348 | 1.09E-12 | 7.56E-12 |
| ZSWIM5        | 1.948850434  | 2.683622845  | 1.10E-12 | 7.59E-12 |
| AC106820.5    | 2.035400595  | -2.69240471  | 1.12E-12 | 7.73E-12 |
| PYCR3         | 1.011999673  | 4.728857463  | 1.13E-12 | 7.78E-12 |
| AC005077.2    | -2.195260542 | -2.222804596 | 1.14E-12 | 7.85E-12 |
| RHPN1-AS1     | 1.469955966  | -0.37027916  | 1.14E-12 | 7.90E-12 |
| AL158819.1    | 6.321069829  | -2.051072561 | 1.15E-12 | 7.94E-12 |
| BPIFB4        | 4.122901281  | -2.054579494 | 1.18E-12 | 8.09E-12 |
| IRX3          | 2.505306271  | 2.164115678  | 1.18E-12 | 8.10E-12 |
| KCNJ15        | -1.416726648 | 0.753868991  | 1.19E-12 | 8.16E-12 |
| GOLGA2P10     | 1.26496239   | 0.329137828  | 1.20E-12 | 8.24E-12 |
| ADAMTSL2      | -1.51180477  | 4.656337592  | 1.20E-12 | 8.24E-12 |
| SLC27A5       | -1.515953811 | 8.990845338  | 1.20E-12 | 8.28E-12 |
| AC007277.1    | 3.816020806  | -1.572586543 | 1.21E-12 | 8.33E-12 |
| FCN1          | -1.310296291 | 1.820244644  | 1.22E-12 | 8.38E-12 |
| AL008729.1    | 1.332240778  | -1.309250205 | 1.24E-12 | 8.48E-12 |
| DNAH12        | 2.690034532  | -0.185699803 | 1.24E-12 | 8.51E-12 |
| KLHL31        | 1.248489843  | -0.018108096 | 1.26E-12 | 8.64E-12 |
| TESC          | 2.749552753  | 4.608579076  | 1.26E-12 | 8.66E-12 |
| HSP90AB3P     | 1.291770135  | -0.703332508 | 1.28E-12 | 8.75E-12 |
| IFI27L1       | 1.03691227   | 3.145089907  | 1.29E-12 | 8.83E-12 |
| AC104966.1    | -1.407992029 | 0.631845117  | 1.29E-12 | 8.85E-12 |
| AL049830.3    | 2.947344655  | -2.858190055 | 1.31E-12 | 8.92E-12 |
| FAR2P1        | 6.792135992  | 0.273830753  | 1.31E-12 | 8.92E-12 |
| RAET1E        | 1.780426872  | -2.682915803 | 1.31E-12 | 8.92E-12 |
| LAMB4         | 2.77051446   | -1.267826382 | 1.31E-12 | 8.97E-12 |
| EEF1A2        | 3.932506567  | 6.303536079  | 1.33E-12 | 9.09E-12 |
| SRPX          | -1.765342735 | 2.346716923  | 1.34E-12 | 9.17E-12 |
| INPP5J        | 2.065578594  | 0.113773694  | 1.35E-12 | 9.23E-12 |
| LINC01607     | 1.877322494  | -1.354296162 | 1.37E-12 | 9.32E-12 |
| LILRB1        | -1.169701322 | 1.829749019  | 1.39E-12 | 9.45E-12 |
| CCDC102B      | 1.265710469  | 1.514218294  | 1.39E-12 | 9.48E-12 |
| FHDC1         | 1.978092403  | 0.324795801  | 1.40E-12 | 9.53E-12 |
| AC092957.1    | 5.508562304  | -2.399509202 | 1.41E-12 | 9.60E-12 |
| STPG3-AS1     | 1.908275871  | 0.267675679  | 1.43E-12 | 9.73E-12 |
| PAIP2B        | -1.388621353 | 3.976522906  | 1.45E-12 | 9.82E-12 |
| SPATA3-AS1    | 2.646285704  | -2.744005279 | 1.46E-12 | 9.92E-12 |
| MAGEA12       | 7.687460004  | 2.111337463  | 1.46E-12 | 9.93E-12 |
| CEP83-DT      | 1.426993888  | -2.28446878  | 1.49E-12 | 1.01E-11 |
| MDFI          | 2.382761458  | 1.537600195  | 1.49E-12 | 1.01E-11 |
| GDPD1         | 1.170909417  | 1.159623101  | 1.50E-12 | 1.01E-11 |
| TXNRD1        | 1.394867648  | 7.28844545   | 1.51E-12 | 1.02E-11 |
| LPCAT1        | 1.397104038  | 5.171175986  | 1.52E-12 | 1.03E-11 |
| PYCR1         | 2.499855263  | 4.169987239  | 1.54E-12 | 1.04E-11 |
| F11-AS1       | -1.177473251 | 2.749585619  | 1.55E-12 | 1.05E-11 |
| BX276092.7    | 7.880076007  | -0.938580477 | 1.56E-12 | 1.05E-11 |
| SNHG21        | 1.008417973  | -0.752379322 | 1.57E-12 | 1.06E-11 |
| CTD-2297D10.2 | 5.523880731  | -0.853669779 | 1.58E-12 | 1.06E-11 |
| CNIH2         | 1.645743722  | -0.899746254 | 1.60E-12 | 1.08E-11 |
| ZNF385C       | 1.899905218  | 0.315877979  | 1.61E-12 | 1.09E-11 |
| AC098934.2    | 1.941889302  | 0.317781459  | 1.63E-12 | 1.10E-11 |
| AL031123.2    | 1.36321831   | -0.16551229  | 1.63E-12 | 1.10E-11 |
| CIART         | 1.504590562  | 2.751856906  | 1.65E-12 | 1.11E-11 |
| PCDH9-AS2     | -3.059189055 | -2.416602454 | 1.67E-12 | 1.12E-11 |

|              |              |              |          |          |
|--------------|--------------|--------------|----------|----------|
| GEMIN7-AS1   | 1.147831569  | -2.168181861 | 1.69E-12 | 1.14E-11 |
| S100A1       | 2.658397669  | 3.164456127  | 1.70E-12 | 1.14E-11 |
| PPP2R2C      | 4.694646294  | 1.694926347  | 1.71E-12 | 1.15E-11 |
| MTND5P11     | -1.586469874 | -0.193384714 | 1.72E-12 | 1.15E-11 |
| MIR647       | 1.504276495  | -1.643359196 | 1.72E-12 | 1.15E-11 |
| AC092117.1   | 1.522237631  | -0.899566838 | 1.72E-12 | 1.16E-11 |
| LY6G5B       | 1.37499123   | 0.01690973   | 1.73E-12 | 1.16E-11 |
| AL512770.1   | 1.227669138  | -1.38112688  | 1.73E-12 | 1.16E-11 |
| KAZALD1      | 1.736197253  | 1.439223253  | 1.75E-12 | 1.17E-11 |
| BREA2        | 1.387728437  | -1.885607808 | 1.75E-12 | 1.17E-11 |
| MAGEA3       | 7.113802462  | 3.000138296  | 1.75E-12 | 1.17E-11 |
| AC108751.4   | 1.797506917  | -1.410444979 | 1.77E-12 | 1.18E-11 |
| PLA2G4C-AS1  | 1.714350705  | -2.537038096 | 1.80E-12 | 1.20E-11 |
| MT1G         | -2.491775749 | 8.572657576  | 1.82E-12 | 1.22E-11 |
| AC026401.3   | 1.136832925  | 1.253074729  | 1.83E-12 | 1.23E-11 |
| MAGEA8       | 6.779288512  | -0.231464176 | 1.84E-12 | 1.23E-11 |
| FHL2         | -1.222699876 | 3.594212172  | 1.84E-12 | 1.23E-11 |
| EGF          | 4.729469904  | 0.207363306  | 1.84E-12 | 1.23E-11 |
| AC009137.2   | -1.16556075  | -2.694274555 | 1.84E-12 | 1.23E-11 |
| PNCK         | 6.047195041  | 1.894657059  | 1.85E-12 | 1.23E-11 |
| CNTN4        | -1.362342485 | 0.795028114  | 1.87E-12 | 1.25E-11 |
| SLC22A8      | 7.077577629  | -0.084759088 | 1.88E-12 | 1.25E-11 |
| AL031665.2   | 1.274697504  | -2.082276707 | 1.90E-12 | 1.26E-11 |
| AZGP1P2      | -1.623522404 | -1.616827096 | 1.90E-12 | 1.26E-11 |
| LMNB1        | 1.216410635  | 4.352250045  | 1.91E-12 | 1.27E-11 |
| AC119424.1   | -1.679786869 | -1.628562784 | 1.91E-12 | 1.27E-11 |
| AC025254.1   | 6.84036137   | -1.868443999 | 1.92E-12 | 1.28E-11 |
| SSTR5-AS1    | 6.390553122  | 2.221514926  | 1.93E-12 | 1.28E-11 |
| SP8          | 6.282006927  | -1.157376658 | 1.95E-12 | 1.29E-11 |
| TMEM253      | 1.580033821  | -2.481685216 | 1.96E-12 | 1.30E-11 |
| CTNNA2       | 5.839952348  | 2.861474465  | 2.03E-12 | 1.35E-11 |
| ATP5MF-PTCD: | 1.562188797  | -2.707304061 | 2.04E-12 | 1.35E-11 |
| SNHG6        | 1.345304823  | 5.642171123  | 2.11E-12 | 1.39E-11 |
| DMBX1        | 4.896103483  | -1.895633003 | 2.11E-12 | 1.40E-11 |
| ADAMTS16     | 3.678603971  | 1.647682951  | 2.13E-12 | 1.41E-11 |
| SELP         | -1.511210571 | 1.160374586  | 2.15E-12 | 1.42E-11 |
| BEND3        | 1.144306615  | 1.73359497   | 2.15E-12 | 1.42E-11 |
| AC090559.1   | -1.275554155 | -1.24153187  | 2.16E-12 | 1.43E-11 |
| AC009065.4   | 1.198752843  | -0.841410784 | 2.17E-12 | 1.43E-11 |
| RMST         | 3.645539917  | -1.45598416  | 2.17E-12 | 1.43E-11 |
| AC090164.2   | 2.577299129  | -1.532093383 | 2.17E-12 | 1.43E-11 |
| AC099343.2   | 1.416017307  | -2.335641734 | 2.20E-12 | 1.45E-11 |
| LYG1         | 1.133193708  | -0.468347784 | 2.20E-12 | 1.45E-11 |
| FABP4        | 2.736443819  | 3.519426052  | 2.21E-12 | 1.46E-11 |
| FAM229A      | 1.044019903  | 0.969752423  | 2.23E-12 | 1.47E-11 |
| LINC01225    | 2.835266179  | -2.323046609 | 2.25E-12 | 1.48E-11 |
| KCNH6        | 4.894345658  | -0.190075415 | 2.29E-12 | 1.50E-11 |
| AC092803.2   | 1.074923598  | 0.630963112  | 2.29E-12 | 1.51E-11 |
| SLC16A2      | -1.172558555 | 6.188020911  | 2.29E-12 | 1.51E-11 |
| TNFRSF18     | 1.929510499  | 0.607434535  | 2.31E-12 | 1.51E-11 |
| AC112484.1   | 1.613741062  | -1.349205036 | 2.34E-12 | 1.53E-11 |
| NTM          | 2.942424943  | 0.846106016  | 2.34E-12 | 1.53E-11 |
| DRC1         | 2.228977158  | -2.395621263 | 2.37E-12 | 1.55E-11 |
| TAS2R4       | 1.47534346   | -2.430781218 | 2.38E-12 | 1.56E-11 |
| ANKS1B       | 2.64777516   | 0.340792803  | 2.39E-12 | 1.56E-11 |
| SMKR1        | 2.81553766   | -1.554696155 | 2.39E-12 | 1.56E-11 |
| AC068987.4   | 1.848493433  | 1.440440476  | 2.40E-12 | 1.57E-11 |
| LY6E-DT      | -1.808309701 | -0.073593877 | 2.41E-12 | 1.57E-11 |

|            |              |              |          |          |
|------------|--------------|--------------|----------|----------|
| PTK7       | 2.210731294  | 3.615254494  | 2.41E-12 | 1.57E-11 |
| SULT1A1    | -1.132418117 | 6.521295327  | 2.46E-12 | 1.61E-11 |
| ZNF433-AS1 | 1.036247925  | 0.443327863  | 2.50E-12 | 1.63E-11 |
| DNM3OS     | -1.333199529 | -0.319723284 | 2.52E-12 | 1.65E-11 |
| AC245595.1 | 2.353158304  | -2.081759284 | 2.54E-12 | 1.66E-11 |
| AL121772.3 | 1.595540414  | -2.628831755 | 2.55E-12 | 1.66E-11 |
| CAVIN4     | 1.679700264  | -1.424701324 | 2.55E-12 | 1.66E-11 |
| TTR        | -1.518420437 | 11.27921155  | 2.56E-12 | 1.67E-11 |
| BBOX1-AS1  | 4.632646959  | -1.566524403 | 2.58E-12 | 1.68E-11 |
| RNF126P1   | 2.54066683   | -2.297931541 | 2.61E-12 | 1.70E-11 |
| LINC00235  | 1.458491051  | -0.936883485 | 2.61E-12 | 1.70E-11 |
| FLNC       | 3.274384836  | 4.286406142  | 2.65E-12 | 1.72E-11 |
| C19orf81   | 4.658374726  | -1.624678762 | 2.69E-12 | 1.75E-11 |
| AC007038.2 | 1.063912858  | -1.315727469 | 2.70E-12 | 1.75E-11 |
| AL357079.1 | 1.395307465  | -2.273714378 | 2.72E-12 | 1.76E-11 |
| TENT5C     | -1.176312877 | 3.500118546  | 2.73E-12 | 1.77E-11 |
| LINC01608  | 6.461463181  | -0.726347475 | 2.74E-12 | 1.78E-11 |
| DPT        | -2.025255383 | 2.87456365   | 2.74E-12 | 1.78E-11 |
| ARTN       | 1.745522802  | -1.254118639 | 2.77E-12 | 1.80E-11 |
| PCDHA1     | 4.858829697  | -0.49297663  | 2.81E-12 | 1.82E-11 |
| CYP2J2     | -1.115849471 | 6.296628353  | 2.87E-12 | 1.85E-11 |
| KIF5A      | 3.027680536  | -2.033180825 | 2.88E-12 | 1.86E-11 |
| AL355574.1 | 1.335172365  | -1.893114705 | 2.88E-12 | 1.86E-11 |
| FHL1       | -1.090447306 | 4.232431376  | 2.90E-12 | 1.87E-11 |
| AC007611.1 | 1.19529489   | -1.375979095 | 2.90E-12 | 1.87E-11 |
| AL023806.3 | 1.71883008   | -2.910423788 | 2.90E-12 | 1.87E-11 |
| CASS4      | -1.053183505 | 0.773013357  | 2.95E-12 | 1.90E-11 |
| AC073611.1 | 1.187166463  | -1.208059833 | 2.95E-12 | 1.90E-11 |
| LINC02404  | 6.664342798  | -0.593637473 | 2.99E-12 | 1.93E-11 |
| EPHB2      | 2.515554447  | 3.277164573  | 3.06E-12 | 1.97E-11 |
| LINC00607  | 2.414145374  | 0.166403639  | 3.06E-12 | 1.97E-11 |
| CAPN9      | 2.651203925  | -0.972323875 | 3.11E-12 | 2.00E-11 |
| C1orf61    | 3.111211032  | -0.603870666 | 3.12E-12 | 2.01E-11 |
| MICE       | 1.441198188  | -0.752650976 | 3.25E-12 | 2.09E-11 |
| NAT8L      | 3.480196278  | 0.822358678  | 3.26E-12 | 2.10E-11 |
| GPR82      | -1.332353887 | -1.685148111 | 3.28E-12 | 2.11E-11 |
| PRSS2      | 9.249702142  | 2.564015367  | 3.32E-12 | 2.13E-11 |
| KIAA1211L  | 1.31052368   | 1.173038277  | 3.35E-12 | 2.15E-11 |
| MCCD1      | 6.217648565  | 0.993955652  | 3.35E-12 | 2.15E-11 |
| TNXB       | -1.402899173 | 3.134409124  | 3.36E-12 | 2.16E-11 |
| AL138762.1 | 1.36987253   | -1.954384652 | 3.36E-12 | 2.16E-11 |
| AC069224.1 | 1.340586194  | -1.145818258 | 3.37E-12 | 2.16E-11 |
| DHRS1      | -1.026640234 | 6.122495666  | 3.41E-12 | 2.18E-11 |
| FOLH1B     | -2.055446616 | 1.869606227  | 3.43E-12 | 2.20E-11 |
| APOA5      | -1.500984821 | 8.061437398  | 3.45E-12 | 2.21E-11 |
| AC010333.2 | 4.015323471  | -2.964543715 | 3.45E-12 | 2.21E-11 |
| ALDOB      | -1.547420935 | 12.06296093  | 3.46E-12 | 2.21E-11 |
| AC087164.2 | -1.807473746 | 1.31883046   | 3.46E-12 | 2.22E-11 |
| AC099568.2 | 1.448986097  | -1.682663465 | 3.48E-12 | 2.23E-11 |
| TEX11      | 4.046537059  | 0.236841333  | 3.50E-12 | 2.24E-11 |
| CHRND      | 5.610064627  | -1.083145161 | 3.51E-12 | 2.25E-11 |
| FAM162B    | 1.437877531  | -0.46775067  | 3.57E-12 | 2.28E-11 |
| RNF180     | -1.166185572 | 1.680171437  | 3.60E-12 | 2.30E-11 |
| CA4        | 3.225933092  | 0.360239829  | 3.61E-12 | 2.30E-11 |
| SOX6       | -1.373430527 | 3.052034794  | 3.62E-12 | 2.31E-11 |
| ZFHX2-AS1  | 1.183121133  | -0.825459723 | 3.62E-12 | 2.31E-11 |
| MYBL1      | 1.213354057  | 1.857866806  | 3.62E-12 | 2.31E-11 |
| AC245052.4 | 1.089795635  | -0.606239685 | 3.64E-12 | 2.32E-11 |

|            |              |              |          |          |
|------------|--------------|--------------|----------|----------|
| APC2       | 1.044872328  | 1.388290177  | 3.66E-12 | 2.33E-11 |
| GRIN2C     | 1.196421864  | -0.862684064 | 3.67E-12 | 2.33E-11 |
| COLEC11    | -1.438224449 | 5.427723198  | 3.68E-12 | 2.34E-11 |
| SORT1      | 1.204559573  | 5.525188046  | 3.69E-12 | 2.34E-11 |
| MMP12      | 4.163721087  | 1.212840358  | 3.69E-12 | 2.35E-11 |
| HSD17B13   | -2.211476566 | 7.537025704  | 3.71E-12 | 2.36E-11 |
| AC092667.1 | 2.241582279  | -1.98151085  | 3.76E-12 | 2.39E-11 |
| BLVRA      | 1.245372036  | 4.17581622   | 3.77E-12 | 2.39E-11 |
| AC010333.1 | 4.169997635  | -3.000705771 | 3.79E-12 | 2.40E-11 |
| AC092171.3 | 1.21975531   | 0.928779738  | 3.81E-12 | 2.42E-11 |
| OR51E2     | 2.913308874  | -2.742609886 | 3.83E-12 | 2.43E-11 |
| AL359513.1 | 1.587583734  | -1.696217848 | 3.86E-12 | 2.44E-11 |
| AC015813.1 | 1.242303642  | 1.921772929  | 3.88E-12 | 2.46E-11 |
| FAM182B    | 2.070580701  | -1.925687649 | 3.90E-12 | 2.47E-11 |
| PHBP11     | 1.901729984  | -1.204762806 | 3.93E-12 | 2.49E-11 |
| CAPN8      | 2.768844457  | 0.81561771   | 3.95E-12 | 2.50E-11 |
| TMIGD3     | -1.237845918 | 1.576131517  | 3.96E-12 | 2.51E-11 |
| SMPX       | 3.273290728  | 0.006886571  | 3.98E-12 | 2.52E-11 |
| RNU6-850P  | 2.05706362   | -2.961351022 | 3.99E-12 | 2.52E-11 |
| DMBT1      | 6.088002762  | 2.199611887  | 4.01E-12 | 2.54E-11 |
| LINC01480  | 3.4531614    | 0.22629242   | 4.04E-12 | 2.55E-11 |
| AL353801.3 | 1.646372441  | -2.817717809 | 4.13E-12 | 2.60E-11 |
| PAGE1      | 9.29952067   | 2.455666508  | 4.18E-12 | 2.64E-11 |
| AP000525.1 | 2.631609909  | -2.545049828 | 4.20E-12 | 2.64E-11 |
| HSD17B6    | -1.379485755 | 8.842828357  | 4.23E-12 | 2.66E-11 |
| AL137026.2 | 4.333779235  | -2.776741273 | 4.28E-12 | 2.69E-11 |
| INHBC      | -1.376407888 | 5.607630123  | 4.32E-12 | 2.72E-11 |
| AL157778.1 | 5.559365796  | -2.468639851 | 4.33E-12 | 2.72E-11 |
| CDC20B     | 4.161267336  | -1.074353635 | 4.33E-12 | 2.72E-11 |
| AL139130.1 | 3.600100128  | -2.780570133 | 4.34E-12 | 2.72E-11 |
| PART1      | 7.042084076  | 0.534298199  | 4.36E-12 | 2.74E-11 |
| OGDHL      | -1.422276947 | 6.641591852  | 4.37E-12 | 2.74E-11 |
| AC106771.1 | 5.354318869  | -2.816886598 | 4.38E-12 | 2.74E-11 |
| MIR548XHG  | 6.530959734  | -1.667305396 | 4.46E-12 | 2.80E-11 |
| FBLIM1     | 1.325738799  | 4.46638686   | 4.58E-12 | 2.87E-11 |
| DRGX       | 5.336570662  | -1.497480255 | 4.63E-12 | 2.90E-11 |
| NCKAP5     | -1.27849216  | 1.434427612  | 4.67E-12 | 2.92E-11 |
| CASC20     | 5.800634161  | -1.943634477 | 4.67E-12 | 2.92E-11 |
| PADI3      | 7.860100009  | 1.259850781  | 4.69E-12 | 2.93E-11 |
| AC112907.3 | 1.231165031  | -1.821248684 | 4.69E-12 | 2.93E-11 |
| GOLGA8A    | 1.734107986  | 2.521455538  | 4.79E-12 | 2.99E-11 |
| AC145207.5 | 1.085499078  | 0.641043869  | 4.79E-12 | 2.99E-11 |
| HTR1D      | 4.296656326  | 1.347064173  | 4.81E-12 | 3.00E-11 |
| FLJ45513   | 1.430410682  | -0.632279913 | 4.81E-12 | 3.00E-11 |
| GCM1       | 3.635726285  | -2.531696527 | 4.82E-12 | 3.01E-11 |
| AC069277.1 | 5.095968739  | -2.089329131 | 4.86E-12 | 3.03E-11 |
| SMYD2      | 1.018008657  | 5.692315113  | 5.04E-12 | 3.14E-11 |
| EXTL1      | 2.525443806  | -1.781058812 | 5.10E-12 | 3.17E-11 |
| AF279873.3 | 6.654139539  | -1.193591973 | 5.13E-12 | 3.19E-11 |
| CST1       | 7.560575968  | 3.537699063  | 5.14E-12 | 3.20E-11 |
| BRINP3     | 6.004165613  | -1.307123183 | 5.17E-12 | 3.21E-11 |
| CCL2       | -1.383558487 | 3.95511258   | 5.17E-12 | 3.21E-11 |
| AC124242.1 | -1.178213189 | -1.505801021 | 5.18E-12 | 3.22E-11 |
| LINC01108  | 2.908967074  | -1.57136222  | 5.21E-12 | 3.24E-11 |
| BCAT1      | 1.710674438  | 2.624931761  | 5.22E-12 | 3.24E-11 |
| SRARP      | 5.238756094  | 0.367549357  | 5.25E-12 | 3.26E-11 |
| CDRT1      | 3.125145755  | -1.286342428 | 5.28E-12 | 3.27E-11 |
| SLAIN1     | -1.584421324 | 1.434272499  | 5.29E-12 | 3.28E-11 |

|             |              |              |          |          |
|-------------|--------------|--------------|----------|----------|
| GBP1        | -1.053348235 | 5.698514446  | 5.40E-12 | 3.34E-11 |
| NRG2        | 2.319864679  | 0.289974444  | 5.51E-12 | 3.41E-11 |
| BORA        | 1.045790944  | 0.564692001  | 5.52E-12 | 3.42E-11 |
| SGK1        | -1.140153457 | 6.016583266  | 5.54E-12 | 3.43E-11 |
| AL136295.6  | 1.051267582  | -1.398429571 | 5.65E-12 | 3.49E-11 |
| LINC00106   | 1.450351116  | -0.268578578 | 5.66E-12 | 3.50E-11 |
| CEACAM3     | -1.559843005 | -2.618113175 | 5.74E-12 | 3.54E-11 |
| Z95331.1    | 1.171966488  | -1.216142079 | 5.92E-12 | 3.65E-11 |
| AC073529.1  | 1.375589608  | -2.252396716 | 6.12E-12 | 3.77E-11 |
| SMIM32      | 4.60752734   | 2.054489911  | 6.28E-12 | 3.87E-11 |
| ADGRB2      | 2.838325338  | 0.207595318  | 6.29E-12 | 3.87E-11 |
| HIST1H1PS1  | 2.569196484  | -2.708657249 | 6.34E-12 | 3.90E-11 |
| C12orf75    | 2.159321239  | 3.464219125  | 6.43E-12 | 3.95E-11 |
| HIC2        | 1.25709153   | 2.64091203   | 6.43E-12 | 3.96E-11 |
| MAP7D2      | 3.668695595  | 1.700943514  | 6.56E-12 | 4.03E-11 |
| ZNF738      | 1.59702709   | 0.277590877  | 6.60E-12 | 4.05E-11 |
| IMPDH1P6    | 2.021092653  | -2.055010534 | 6.64E-12 | 4.08E-11 |
| NAA11       | 7.774036018  | -0.362315945 | 6.65E-12 | 4.08E-11 |
| C12orf56    | 4.316839228  | -0.939417114 | 6.66E-12 | 4.09E-11 |
| PLA2G4C     | 1.238150187  | 4.293656544  | 6.72E-12 | 4.12E-11 |
| HYI-AS1     | 1.417810432  | -1.92295415  | 6.75E-12 | 4.13E-11 |
| LINC02438   | 3.415488201  | -2.85066245  | 6.77E-12 | 4.15E-11 |
| OTOG        | 6.307460292  | -0.338130726 | 6.78E-12 | 4.15E-11 |
| ADAM23      | 3.134035917  | 1.59221169   | 6.98E-12 | 4.27E-11 |
| AL031777.1  | 2.186136894  | -1.467394503 | 6.99E-12 | 4.27E-11 |
| IRX6        | 5.390521892  | -1.582150854 | 7.07E-12 | 4.32E-11 |
| AC010595.1  | 5.255737511  | -2.574843219 | 7.10E-12 | 4.34E-11 |
| LINC01977   | 2.963124685  | -1.870861959 | 7.19E-12 | 4.39E-11 |
| CHST6       | 2.693777984  | -1.907490579 | 7.19E-12 | 4.39E-11 |
| CDC25B      | 1.004564493  | 5.533738187  | 7.19E-12 | 4.39E-11 |
| LINC00944   | 2.793202889  | -0.548588585 | 7.22E-12 | 4.40E-11 |
| LINC00491   | 5.644010839  | -2.646251045 | 7.39E-12 | 4.50E-11 |
| AC068831.1  | 1.253107479  | -2.507318355 | 7.48E-12 | 4.55E-11 |
| STRCP1      | 3.178837249  | -0.796682539 | 7.63E-12 | 4.64E-11 |
| AKR1B15     | 3.862569678  | 2.44970969   | 7.70E-12 | 4.68E-11 |
| SATB1       | -1.089552348 | 3.418764328  | 7.71E-12 | 4.69E-11 |
| FGF17       | 3.30276411   | -0.998978498 | 7.76E-12 | 4.72E-11 |
| KREMEN2     | 2.339196118  | -1.307422299 | 7.80E-12 | 4.73E-11 |
| PRDM9       | 3.790151931  | -2.752634868 | 7.92E-12 | 4.81E-11 |
| IGHA2       | -1.850984571 | 3.635664789  | 7.97E-12 | 4.84E-11 |
| AC010542.5  | 1.214179644  | -1.68257722  | 7.98E-12 | 4.84E-11 |
| PFN4        | 1.529083329  | -0.912393079 | 8.05E-12 | 4.88E-11 |
| AP005057.1  | 3.4258019    | -2.139576365 | 8.05E-12 | 4.88E-11 |
| PLP2        | 1.507127354  | 5.071658093  | 8.08E-12 | 4.90E-11 |
| AL928654.1  | 1.14603998   | -0.01616438  | 8.11E-12 | 4.91E-11 |
| VSIG1       | 4.036012572  | 1.711260009  | 8.34E-12 | 5.04E-11 |
| AC113404.1  | 2.975970742  | -1.885042995 | 8.34E-12 | 5.04E-11 |
| AC122710.1  | 5.616177951  | -2.457334021 | 8.39E-12 | 5.07E-11 |
| SLC12A5-AS1 | 2.487397545  | -1.357109431 | 8.42E-12 | 5.09E-11 |
| AC003072.1  | 1.028518675  | -0.552200045 | 8.42E-12 | 5.09E-11 |
| IGF2BP2     | 2.280460287  | 3.879805232  | 8.43E-12 | 5.09E-11 |
| AC015909.5  | 1.498733837  | -2.809681305 | 8.45E-12 | 5.09E-11 |
| AP002478.1  | 5.231971152  | -2.365048908 | 8.51E-12 | 5.13E-11 |
| STAG3L5P    | 1.105528998  | 1.720393293  | 8.62E-12 | 5.19E-11 |
| GDPD3       | 1.523888001  | 0.497358119  | 8.68E-12 | 5.23E-11 |
| MICB        | 1.266754609  | 1.995481564  | 8.68E-12 | 5.23E-11 |
| GABBR2      | 4.41832435   | 1.793311168  | 8.74E-12 | 5.26E-11 |
| CLCNKA      | 2.616624837  | -0.344597964 | 8.79E-12 | 5.29E-11 |

|            |              |              |          |          |
|------------|--------------|--------------|----------|----------|
| AL117336.3 | 1.098551151  | 0.01596422   | 8.82E-12 | 5.30E-11 |
| CSF1R      | -1.0543556   | 4.777632728  | 8.91E-12 | 5.36E-11 |
| EGFL8      | 1.197995862  | -0.389127615 | 9.06E-12 | 5.44E-11 |
| CLDN18     | 4.219301241  | -0.58578845  | 9.11E-12 | 5.48E-11 |
| AOC1       | -2.07401809  | 1.812711113  | 9.26E-12 | 5.56E-11 |
| AC004076.2 | 1.368928199  | -1.609747768 | 9.26E-12 | 5.56E-11 |
| CRYBG1     | -1.017618627 | 3.875506172  | 9.49E-12 | 5.70E-11 |
| LINC02159  | 4.560732755  | -1.765090697 | 9.51E-12 | 5.70E-11 |
| PPP1R16A   | 1.140851192  | 6.536440875  | 9.57E-12 | 5.73E-11 |
| AC012617.1 | 2.375149313  | -2.713965962 | 9.64E-12 | 5.77E-11 |
| EIF4HP2    | 1.570001732  | -2.072967943 | 9.69E-12 | 5.80E-11 |
| SIGLEC14   | -1.721204859 | 0.227003637  | 9.70E-12 | 5.80E-11 |
| PPEF1      | 2.238440381  | -2.403233701 | 9.83E-12 | 5.88E-11 |
| FCGR2B     | -1.708549713 | 2.727890082  | 1.01E-11 | 6.02E-11 |
| AC241584.1 | 2.040916744  | -2.744171387 | 1.01E-11 | 6.03E-11 |
| COL7A1     | 2.736798146  | 4.208625251  | 1.02E-11 | 6.07E-11 |
| PDZK1P1    | 1.673463191  | -1.845376238 | 1.02E-11 | 6.08E-11 |
| PDGFRL     | 1.577263061  | 0.653712282  | 1.02E-11 | 6.09E-11 |
| ALDOA      | 1.102650247  | 8.500472399  | 1.02E-11 | 6.11E-11 |
| PRDM12     | 1.813737626  | -2.307052842 | 1.03E-11 | 6.14E-11 |
| CDA        | -1.371748963 | 4.253952798  | 1.03E-11 | 6.16E-11 |
| AC048341.1 | 1.070419265  | 0.189242179  | 1.07E-11 | 6.35E-11 |
| PGLYRP2    | -1.561576546 | 7.374085725  | 1.08E-11 | 6.43E-11 |
| ZNF57      | 1.189609205  | 1.663290631  | 1.10E-11 | 6.55E-11 |
| NAALADL2   | -1.28970052  | 1.682964174  | 1.10E-11 | 6.55E-11 |
| CSPG4P12   | 1.571244137  | -2.204439897 | 1.12E-11 | 6.65E-11 |
| KIF20B     | 1.000726685  | 2.303975022  | 1.13E-11 | 6.71E-11 |
| RNF224     | 2.674289585  | -2.926187067 | 1.14E-11 | 6.74E-11 |
| MAEL       | 3.957599562  | 1.341263047  | 1.17E-11 | 6.95E-11 |
| AC005150.1 | 7.864553534  | -0.510873103 | 1.18E-11 | 6.96E-11 |
| TNNI2      | 2.591862187  | 0.86118773   | 1.18E-11 | 6.98E-11 |
| LTO1       | 2.050100044  | 4.155425971  | 1.18E-11 | 7.00E-11 |
| CALML6     | 1.78202148   | -1.026249636 | 1.21E-11 | 7.15E-11 |
| MPDZ       | -1.100622219 | 5.69681992   | 1.21E-11 | 7.15E-11 |
| KLHL23     | 1.010180478  | 3.741595935  | 1.21E-11 | 7.17E-11 |
| GTSF1      | 4.227299502  | 2.317354796  | 1.21E-11 | 7.17E-11 |
| AGBL4      | -2.029720754 | -1.413398679 | 1.22E-11 | 7.19E-11 |
| MEFV       | -1.089403008 | -1.171519202 | 1.23E-11 | 7.27E-11 |
| LINC00672  | 1.335178869  | -1.05811174  | 1.24E-11 | 7.33E-11 |
| LINC00624  | 2.758200983  | -0.023483295 | 1.26E-11 | 7.39E-11 |
| SAA2-SAA4  | -2.295019012 | 5.780905845  | 1.26E-11 | 7.43E-11 |
| FCGR3A     | -1.184802816 | 4.954641608  | 1.27E-11 | 7.46E-11 |
| AC025171.5 | 1.529803737  | -2.330132193 | 1.27E-11 | 7.47E-11 |
| AC015802.4 | 1.277877124  | -1.916566145 | 1.29E-11 | 7.56E-11 |
| AL139220.2 | 1.958810652  | -1.969195507 | 1.29E-11 | 7.57E-11 |
| POU3F2     | 3.467014041  | -2.094693495 | 1.29E-11 | 7.60E-11 |
| GJA10      | 6.775406585  | -1.353433223 | 1.30E-11 | 7.62E-11 |
| GPR180     | -1.033626925 | 3.409110828  | 1.30E-11 | 7.64E-11 |
| RGN        | -1.08094351  | 7.248406079  | 1.30E-11 | 7.65E-11 |
| DKK4       | 5.068515436  | 2.328323263  | 1.31E-11 | 7.68E-11 |
| PCDH9      | -1.71042811  | 0.975465851  | 1.32E-11 | 7.74E-11 |
| PP7080     | 1.317119806  | 3.296609077  | 1.32E-11 | 7.74E-11 |
| TRPM8      | -1.486273351 | 4.598900138  | 1.34E-11 | 7.86E-11 |
| ALX3       | 5.660163891  | -2.304731615 | 1.35E-11 | 7.93E-11 |
| FEZF1      | 4.861650974  | -2.059787384 | 1.37E-11 | 8.01E-11 |
| AC036108.2 | 2.319851074  | -1.169232221 | 1.39E-11 | 8.15E-11 |
| CCL26      | 3.03093623   | -1.477233253 | 1.41E-11 | 8.23E-11 |
| BGN        | -1.243646176 | 7.878922983  | 1.45E-11 | 8.48E-11 |



|            |              |              |          |          |
|------------|--------------|--------------|----------|----------|
| RPL22L1    | 1.433017513  | 5.266864909  | 1.45E-11 | 8.48E-11 |
| HPDL       | 2.252093029  | -1.123572115 | 1.46E-11 | 8.50E-11 |
| RPSAP7     | 1.726417568  | -2.025936601 | 1.46E-11 | 8.50E-11 |
| AC007292.1 | 1.178328703  | -0.532645846 | 1.48E-11 | 8.62E-11 |
| CDH19      | -2.046744958 | 0.854700562  | 1.48E-11 | 8.62E-11 |
| CPB2       | -1.046194214 | 9.053256942  | 1.48E-11 | 8.63E-11 |
| JCHAIN     | -1.861953058 | 4.385423055  | 1.49E-11 | 8.66E-11 |
| AC008735.2 | 1.329947358  | -0.46860213  | 1.49E-11 | 8.67E-11 |
| MIR4292    | 1.578317653  | -2.80062379  | 1.49E-11 | 8.69E-11 |
| AP005230.1 | 3.89373643   | -3.000662929 | 1.52E-11 | 8.84E-11 |
| GABRR3     | 3.91292949   | -0.577192645 | 1.53E-11 | 8.89E-11 |
| FCRL6      | -1.195550759 | -0.316535204 | 1.54E-11 | 8.93E-11 |
| AC107959.3 | 2.157641188  | -1.435636132 | 1.54E-11 | 8.97E-11 |
| SPERT      | 4.957895339  | -2.718265714 | 1.55E-11 | 9.01E-11 |
| ZNF716     | 5.642870042  | -1.30959657  | 1.57E-11 | 9.09E-11 |
| LTK        | -1.433506395 | 0.527213674  | 1.58E-11 | 9.19E-11 |
| AP002360.3 | 1.698153225  | -2.322391966 | 1.63E-11 | 9.47E-11 |
| OR2I1P     | 2.094755017  | 5.731540733  | 1.64E-11 | 9.50E-11 |
| RGS20      | 2.474758541  | -2.341706569 | 1.66E-11 | 9.60E-11 |
| AC108062.1 | 1.220506812  | 0.207545717  | 1.66E-11 | 9.62E-11 |
| AC112493.1 | 3.738878687  | -2.648097438 | 1.67E-11 | 9.68E-11 |
| GLS2       | -1.969835581 | 3.325514649  | 1.68E-11 | 9.71E-11 |
| FAM155B    | 2.653483283  | 0.561245732  | 1.68E-11 | 9.72E-11 |
| AC092171.5 | 1.25013766   | 0.386166451  | 1.68E-11 | 9.72E-11 |
| PDGFRB     | 1.152084974  | 5.896064785  | 1.69E-11 | 9.75E-11 |
| AC012676.1 | 1.388259244  | -0.898548995 | 1.73E-11 | 9.98E-11 |
| AC022497.1 | 1.601440728  | -2.119451545 | 1.73E-11 | 9.98E-11 |
| U91324.1   | -1.292393509 | 0.591572384  | 1.73E-11 | 1.00E-10 |
| HIST1H2BJ  | 1.816810702  | 0.513339055  | 1.74E-11 | 1.01E-10 |
| PLEKHG4    | 2.227556211  | 1.369099343  | 1.75E-11 | 1.01E-10 |
| AL590652.1 | 2.455464859  | -2.94967856  | 1.76E-11 | 1.01E-10 |
| ATP8A2     | 3.047708276  | -0.531371798 | 1.77E-11 | 1.02E-10 |
| CECR7      | 3.943698944  | -0.553814228 | 1.77E-11 | 1.02E-10 |
| GJB2       | -1.08929849  | 4.863549189  | 1.77E-11 | 1.02E-10 |
| TMEM178B   | 2.740278696  | 1.002580041  | 1.79E-11 | 1.03E-10 |
| AP006621.5 | 1.471903634  | 0.87202112   | 1.80E-11 | 1.04E-10 |
| HIST1H2AD  | 1.989939326  | -1.488022142 | 1.81E-11 | 1.04E-10 |
| PLA2G16    | -1.034522087 | 5.770526525  | 1.81E-11 | 1.04E-10 |
| CNTNAP1    | 1.540270558  | 1.846350506  | 1.87E-11 | 1.08E-10 |
| AC239803.3 | 2.687184137  | -2.509071238 | 1.92E-11 | 1.10E-10 |
| AC118344.2 | 1.305625136  | -0.4553349   | 1.99E-11 | 1.14E-10 |
| C2CD4B     | -1.538312054 | -0.002695408 | 2.02E-11 | 1.16E-10 |
| AL109615.3 | 3.1252528    | 0.386184757  | 2.03E-11 | 1.16E-10 |
| SLC22A4    | 1.924042036  | 1.106256245  | 2.05E-11 | 1.18E-10 |
| DCAF8L1    | 7.299407791  | -0.980383067 | 2.06E-11 | 1.18E-10 |
| GCKR       | -1.114180842 | 5.684661969  | 2.06E-11 | 1.18E-10 |
| AC016710.1 | 6.25875087   | -2.095989764 | 2.07E-11 | 1.19E-10 |
| SLC46A3    | -1.366835137 | 5.601627227  | 2.07E-11 | 1.19E-10 |
| AC009690.1 | 2.260892452  | -1.707384194 | 2.12E-11 | 1.21E-10 |
| NT5M       | 1.291278067  | 1.422691886  | 2.13E-11 | 1.22E-10 |
| LINC02492  | 5.472246328  | -2.779340149 | 2.13E-11 | 1.22E-10 |
| AOX1       | -1.435080195 | 9.650700894  | 2.14E-11 | 1.23E-10 |
| AC105411.1 | 2.999908917  | -0.245252238 | 2.16E-11 | 1.23E-10 |
| DNAJC12    | -1.406533921 | 4.080058257  | 2.16E-11 | 1.23E-10 |
| SORD       | -1.091286368 | 7.680346212  | 2.17E-11 | 1.24E-10 |
| FAM78B     | 1.256174398  | 1.224528078  | 2.19E-11 | 1.25E-10 |
| AC073655.2 | 1.193424933  | -1.826888666 | 2.20E-11 | 1.26E-10 |
| AKR7A3     | -1.476702901 | 6.273896686  | 2.22E-11 | 1.27E-10 |

|               |              |              |          |          |
|---------------|--------------|--------------|----------|----------|
| AC007099.1    | 5.13822709   | -0.411850588 | 2.23E-11 | 1.27E-10 |
| RARRES2P8     | 6.522395986  | -1.342076475 | 2.23E-11 | 1.27E-10 |
| AL353708.1    | 1.141256837  | -1.394345716 | 2.25E-11 | 1.28E-10 |
| AC145207.8    | 2.498256581  | -2.084610649 | 2.26E-11 | 1.29E-10 |
| TMPRSS15      | 8.588368656  | 1.415372124  | 2.29E-11 | 1.30E-10 |
| MYC           | -1.191374548 | 5.785572565  | 2.33E-11 | 1.33E-10 |
| BX649601.1    | 1.809662414  | -1.809304104 | 2.35E-11 | 1.34E-10 |
| AC009275.1    | 2.437524607  | -0.398732907 | 2.37E-11 | 1.35E-10 |
| DLX6-AS1      | 5.333685716  | -1.027148192 | 2.39E-11 | 1.36E-10 |
| IZUMO1        | 1.682891022  | -2.205015545 | 2.40E-11 | 1.36E-10 |
| UCN           | 1.33283123   | 0.204889242  | 2.41E-11 | 1.37E-10 |
| LINC00310     | -1.12604408  | -2.370916995 | 2.51E-11 | 1.42E-10 |
| RNF157-AS1    | 2.572242575  | -0.669719149 | 2.51E-11 | 1.42E-10 |
| EVA1A         | -1.042077437 | 5.727497931  | 2.52E-11 | 1.42E-10 |
| DLG2          | -1.154380969 | 0.576442582  | 2.62E-11 | 1.48E-10 |
| GATA3         | -1.313959214 | 0.596137871  | 2.65E-11 | 1.50E-10 |
| CDIPTOSP      | 2.369724514  | -2.475381366 | 2.66E-11 | 1.50E-10 |
| PTGIS         | -1.654497395 | 2.764405988  | 2.68E-11 | 1.51E-10 |
| MYCBPAP       | 1.73197548   | -2.134391755 | 2.68E-11 | 1.52E-10 |
| HIST1H2BO     | 1.912029548  | -2.211940671 | 2.69E-11 | 1.52E-10 |
| LYG2          | 2.462184368  | -2.506138626 | 2.70E-11 | 1.53E-10 |
| AMBP          | -1.034663823 | 12.57290703  | 2.74E-11 | 1.54E-10 |
| FAM178B       | 4.606942875  | 0.078072306  | 2.75E-11 | 1.55E-10 |
| AC135586.2    | -1.116319669 | -2.135039958 | 2.75E-11 | 1.55E-10 |
| AQP8          | 3.76218391   | 2.104012903  | 2.76E-11 | 1.56E-10 |
| ADAMTS18      | 3.058097354  | -1.731992151 | 2.78E-11 | 1.57E-10 |
| MST1          | -1.010762621 | 7.920037082  | 2.79E-11 | 1.57E-10 |
| EPHA10        | 3.416107095  | 0.086840329  | 2.79E-11 | 1.57E-10 |
| SBSPON        | 2.366096387  | 1.554697957  | 2.86E-11 | 1.61E-10 |
| AC100872.1    | 2.886609419  | -2.877340141 | 2.89E-11 | 1.62E-10 |
| SH3D21        | 1.186123299  | 0.689099015  | 2.91E-11 | 1.63E-10 |
| PTGDR         | -1.181575463 | -1.411005578 | 3.02E-11 | 1.69E-10 |
| PON1          | -1.372399999 | 8.364897714  | 3.04E-11 | 1.70E-10 |
| DBNDD1        | 1.584505329  | 4.942309034  | 3.07E-11 | 1.72E-10 |
| ATP6V0D2      | 2.926324759  | 0.100543149  | 3.07E-11 | 1.72E-10 |
| MFSD6         | 1.204797745  | 3.305324031  | 3.08E-11 | 1.72E-10 |
| HMGCS2        | -1.193022172 | 10.32758148  | 3.09E-11 | 1.73E-10 |
| AL669831.5    | 1.211457212  | -1.516304074 | 3.11E-11 | 1.74E-10 |
| AC087521.1    | -1.444523238 | -2.673379779 | 3.17E-11 | 1.77E-10 |
| C3P1          | -1.561100318 | 6.657613491  | 3.17E-11 | 1.77E-10 |
| GABRA3        | 5.823179717  | -0.312103584 | 3.19E-11 | 1.78E-10 |
| LINC01549     | 3.450771115  | 0.446995133  | 3.19E-11 | 1.78E-10 |
| RPS6P25       | 1.076969216  | -1.959447681 | 3.19E-11 | 1.78E-10 |
| AC002550.2    | 1.125958927  | -2.490438512 | 3.20E-11 | 1.78E-10 |
| ITGB1BP2      | 1.344977474  | -0.305526087 | 3.21E-11 | 1.79E-10 |
| BTNL8         | 3.625242859  | 2.262897011  | 3.22E-11 | 1.79E-10 |
| SOX11         | 3.468363009  | -2.130078257 | 3.24E-11 | 1.80E-10 |
| NTS           | 6.787022924  | 7.03243038   | 3.28E-11 | 1.82E-10 |
| TSPEAR-AS1    | 2.177352764  | 0.861334816  | 3.31E-11 | 1.84E-10 |
| ATP13A4       | -1.893473911 | -1.625214837 | 3.34E-11 | 1.86E-10 |
| RTKL1-TNFRSF6 | 1.074841679  | 0.187572171  | 3.35E-11 | 1.86E-10 |
| LINC01269     | 3.548991645  | -2.597295192 | 3.46E-11 | 1.92E-10 |
| SLCO6A1       | 5.90208045   | -1.879002899 | 3.47E-11 | 1.93E-10 |
| AC010615.2    | 2.443726276  | -0.878625921 | 3.49E-11 | 1.94E-10 |
| CHST7         | -1.06118434  | 2.643967558  | 3.50E-11 | 1.94E-10 |
| ATP6V0E2-AS1  | 1.337498135  | -0.181002496 | 3.53E-11 | 1.96E-10 |
| SRXN1         | 1.392774591  | 1.760156941  | 3.54E-11 | 1.96E-10 |
| IGF2BP2-AS1   | 3.362517048  | -2.154024467 | 3.54E-11 | 1.97E-10 |

|            |              |              |          |          |
|------------|--------------|--------------|----------|----------|
| CCDC187    | 3.728935974  | 1.294214851  | 3.55E-11 | 1.97E-10 |
| AC242426.2 | 1.101373717  | 1.51287921   | 3.57E-11 | 1.98E-10 |
| ACSL4      | 2.158198156  | 7.949310431  | 3.65E-11 | 2.02E-10 |
| BX649632.1 | 1.540547239  | -2.811006084 | 3.71E-11 | 2.05E-10 |
| PTGDR2     | 1.950093956  | 1.447641473  | 3.76E-11 | 2.08E-10 |
| CACNG4     | 4.028976866  | 2.273659801  | 3.76E-11 | 2.08E-10 |
| AC109588.1 | 6.167711144  | -1.971305269 | 3.77E-11 | 2.09E-10 |
| AP006222.1 | 1.786502881  | -2.024347627 | 3.81E-11 | 2.11E-10 |
| PTGIR      | -1.125428446 | 1.500673616  | 3.81E-11 | 2.11E-10 |
| SEMA4F     | 1.390704984  | 2.233778556  | 3.87E-11 | 2.14E-10 |
| PPIAP29    | 1.776340909  | 0.719444792  | 3.88E-11 | 2.14E-10 |
| KRT12      | 6.977220844  | 0.268776735  | 3.89E-11 | 2.15E-10 |
| TTC9       | 1.820840786  | 4.305548375  | 3.89E-11 | 2.15E-10 |
| SPTY2D1OS  | 1.075154146  | -1.236188486 | 4.06E-11 | 2.24E-10 |
| AC093458.2 | 1.701024279  | -2.231696709 | 4.08E-11 | 2.25E-10 |
| KCNJ6      | 4.392184087  | -0.285432332 | 4.10E-11 | 2.26E-10 |
| AC093788.1 | 1.195701287  | -1.884506735 | 4.19E-11 | 2.31E-10 |
| BAALC-AS1  | 1.630136263  | -0.792113563 | 4.22E-11 | 2.32E-10 |
| LINC01666  | 3.918632801  | -2.39682407  | 4.24E-11 | 2.33E-10 |
| COLEC12    | 2.405845174  | 1.917505085  | 4.24E-11 | 2.33E-10 |
| LINC01446  | 4.592601053  | -0.848440428 | 4.31E-11 | 2.37E-10 |
| AC011481.1 | 1.484839343  | -2.835363215 | 4.33E-11 | 2.38E-10 |
| AC129507.2 | -1.228046249 | 0.054008977  | 4.33E-11 | 2.38E-10 |
| SLITRK3    | -2.703837643 | 1.484441205  | 4.34E-11 | 2.38E-10 |
| CDHR2      | -1.92455654  | 5.277936423  | 4.35E-11 | 2.39E-10 |
| RDH8       | 5.174382419  | -1.72495697  | 4.36E-11 | 2.39E-10 |
| CYP27B1    | 1.670941349  | 0.052987722  | 4.38E-11 | 2.40E-10 |
| AP001350.2 | 1.104166796  | -1.579407859 | 4.40E-11 | 2.41E-10 |
| AP001160.1 | 1.126373299  | -1.696312196 | 4.40E-11 | 2.42E-10 |
| AC022154.1 | 1.424102365  | -2.922298656 | 4.41E-11 | 2.42E-10 |
| SPAG4      | 1.421166859  | 2.470685214  | 4.43E-11 | 2.43E-10 |
| LINC01101  | 4.013759594  | -2.375077158 | 4.49E-11 | 2.46E-10 |
| GHRHR      | 3.697244853  | 0.630332556  | 4.50E-11 | 2.47E-10 |
| SAMD5      | -1.626548218 | 2.982245698  | 4.50E-11 | 2.47E-10 |
| SLCO1B1    | -1.286361961 | 7.059446964  | 4.51E-11 | 2.47E-10 |
| HIST1H4K   | 1.857453273  | -2.303592314 | 4.57E-11 | 2.50E-10 |
| PLCXD3     | -1.769967986 | 0.90110067   | 4.60E-11 | 2.52E-10 |
| SLC22A12   | 5.097221364  | 3.505438294  | 4.66E-11 | 2.55E-10 |
| AC007298.2 | -1.648253514 | -0.737220986 | 4.66E-11 | 2.55E-10 |
| AP001992.1 | 1.376113559  | -0.442049893 | 4.67E-11 | 2.55E-10 |
| UPK1A      | 2.890605283  | -1.09050769  | 4.71E-11 | 2.58E-10 |
| FGF13      | 1.925421082  | 2.496341746  | 4.73E-11 | 2.58E-10 |
| SNRPD2     | 1.018390659  | 6.762386559  | 4.74E-11 | 2.59E-10 |
| MMP14      | 1.324003802  | 6.244984862  | 4.75E-11 | 2.59E-10 |
| LINC02388  | -1.787684307 | -2.390367146 | 4.76E-11 | 2.60E-10 |
| GPR137C    | 1.223336221  | 0.716261023  | 4.86E-11 | 2.65E-10 |
| ASPHD1     | 2.732547876  | 2.56130967   | 4.86E-11 | 2.65E-10 |
| ADGRL1     | 1.826025207  | 3.266719264  | 4.92E-11 | 2.68E-10 |
| TMEM132E   | -1.509017487 | -0.484508514 | 4.92E-11 | 2.68E-10 |
| KCNA3      | -1.451467198 | -1.698424313 | 5.07E-11 | 2.76E-10 |
| FBXO15     | -1.099663415 | -1.213623745 | 5.07E-11 | 2.76E-10 |
| IL2RB      | -1.157537405 | 2.914268302  | 5.11E-11 | 2.78E-10 |
| AC104118.1 | 1.166967505  | -1.403048497 | 5.23E-11 | 2.84E-10 |
| AL359715.4 | -1.213465963 | -2.25631659  | 5.26E-11 | 2.86E-10 |
| LINC00896  | 2.111727894  | 0.289424577  | 5.32E-11 | 2.89E-10 |
| C5orf58    | 3.139761679  | -0.159287456 | 5.33E-11 | 2.89E-10 |
| PDE6G      | -1.034668684 | 0.086564722  | 5.43E-11 | 2.95E-10 |
| BBOX1      | -1.767623117 | 4.128470333  | 5.61E-11 | 3.04E-10 |

|             |              |              |          |          |
|-------------|--------------|--------------|----------|----------|
| SMC4        | 1.26924915   | 3.965317466  | 5.64E-11 | 3.06E-10 |
| AC010761.1  | 1.061611123  | -0.756397856 | 5.65E-11 | 3.06E-10 |
| AC013275.1  | 2.503730044  | 0.581934657  | 5.69E-11 | 3.08E-10 |
| FZD10       | 3.031123769  | -1.338256064 | 5.80E-11 | 3.14E-10 |
| HOXC-AS2    | 3.906763014  | -2.864854538 | 5.82E-11 | 3.15E-10 |
| AL512306.2  | 1.623700962  | -0.510027376 | 5.85E-11 | 3.16E-10 |
| GAS2L3      | 1.154357511  | 2.296640412  | 5.93E-11 | 3.21E-10 |
| SAA2        | -2.29656779  | 9.103676772  | 5.98E-11 | 3.23E-10 |
| RNF144A-AS1 | 2.742749542  | -1.213830066 | 6.01E-11 | 3.24E-10 |
| ARHGAP20    | -1.349162878 | 0.323470768  | 6.01E-11 | 3.24E-10 |
| ZNF92P3     | 2.503230588  | -2.868019759 | 6.10E-11 | 3.29E-10 |
| AC020594.1  | 1.461056055  | -2.555637544 | 6.14E-11 | 3.31E-10 |
| AL031600.1  | 1.642391135  | -2.31049069  | 6.14E-11 | 3.31E-10 |
| AC092115.3  | 3.507004092  | -2.700207069 | 6.15E-11 | 3.31E-10 |
| LINC01134   | 1.251478678  | 0.251217957  | 6.20E-11 | 3.34E-10 |
| PHYHIPL     | 2.037074128  | 3.115956084  | 6.23E-11 | 3.35E-10 |
| HOXB8       | 3.863933848  | -2.486661473 | 6.25E-11 | 3.36E-10 |
| CEACAM4     | -1.172620984 | -1.932986271 | 6.26E-11 | 3.36E-10 |
| FAT4        | -1.202175855 | 2.666273764  | 6.28E-11 | 3.38E-10 |
| KLHL38      | 2.932449347  | -2.383910926 | 6.38E-11 | 3.42E-10 |
| PPFIA4      | 2.53686132   | -0.463657731 | 6.38E-11 | 3.43E-10 |
| CENPX       | 1.070632165  | 5.74424182   | 6.42E-11 | 3.44E-10 |
| RBP2        | 4.28602695   | -0.08059922  | 6.43E-11 | 3.45E-10 |
| AL139100.1  | 1.52889195   | -1.715231784 | 6.45E-11 | 3.46E-10 |
| AC011632.1  | 5.625963556  | -1.509011763 | 6.47E-11 | 3.47E-10 |
| TREML3P     | 4.685295558  | -0.544648401 | 6.49E-11 | 3.48E-10 |
| ARHGEF2     | 1.029779886  | 4.637653132  | 6.50E-11 | 3.48E-10 |
| AC080112.3  | 1.129396461  | -0.710482204 | 6.53E-11 | 3.50E-10 |
| ENTPD2      | 1.66517874   | 2.020206909  | 6.54E-11 | 3.50E-10 |
| MFS10       | 1.072952791  | 4.473775844  | 6.79E-11 | 3.63E-10 |
| AL449212.1  | 1.291545049  | -1.920132957 | 7.06E-11 | 3.78E-10 |
| SLC1A1      | -1.42107193  | 5.367165049  | 7.08E-11 | 3.78E-10 |
| ANGPTL3     | -1.150751676 | 8.456813971  | 7.08E-11 | 3.78E-10 |
| KIF21B      | 1.50326927   | 3.240049295  | 7.10E-11 | 3.79E-10 |
| RNASE4      | -1.057982961 | 4.356084218  | 7.18E-11 | 3.83E-10 |
| RPL10L      | 4.976793795  | -1.658584378 | 7.19E-11 | 3.84E-10 |
| AC026250.1  | 1.462280716  | -1.422700609 | 7.41E-11 | 3.95E-10 |
| AL021392.1  | 1.98919484   | -1.955818742 | 7.56E-11 | 4.03E-10 |
| PTGER2      | -1.206290844 | 0.038991324  | 7.69E-11 | 4.10E-10 |
| AC009121.2  | 1.972475031  | -2.970611422 | 7.82E-11 | 4.17E-10 |
| TRIM46      | 1.667855065  | -0.922799859 | 7.91E-11 | 4.21E-10 |
| AP000253.1  | -1.236219611 | -2.276927385 | 7.92E-11 | 4.21E-10 |
| MIR663AHG   | 6.17033931   | -1.682258798 | 7.98E-11 | 4.24E-10 |
| SYNPO2      | -1.111903512 | 3.284817418  | 7.99E-11 | 4.25E-10 |
| PRKCB       | -1.167934033 | 1.968260672  | 8.01E-11 | 4.26E-10 |
| LINC00173   | 2.044402029  | -2.451736447 | 8.03E-11 | 4.26E-10 |
| CDH9        | 6.892647258  | -1.178295495 | 8.14E-11 | 4.32E-10 |
| SPTBN2      | -1.241250131 | 5.09300437   | 8.26E-11 | 4.38E-10 |
| COLCA1      | 1.815841089  | 1.329663921  | 8.27E-11 | 4.39E-10 |
| LINC01615   | 2.806922706  | -2.607567145 | 8.33E-11 | 4.41E-10 |
| AL162726.3  | 2.868056755  | -1.586028313 | 8.43E-11 | 4.47E-10 |
| VWA5B2      | 2.323901113  | -1.045795742 | 8.44E-11 | 4.47E-10 |
| ITIH1       | -1.094752047 | 10.71412402  | 8.56E-11 | 4.53E-10 |
| LY6K        | 3.929189488  | 0.234306916  | 8.59E-11 | 4.55E-10 |
| DLX6        | 5.820434914  | -1.35401233  | 8.68E-11 | 4.60E-10 |
| PRR19       | 1.997160588  | 0.499601     | 8.69E-11 | 4.60E-10 |
| NROB1       | 6.471585566  | -0.48951482  | 8.75E-11 | 4.63E-10 |
| HHATL       | 5.884941138  | 1.677079837  | 8.79E-11 | 4.65E-10 |

|            |              |              |          |          |
|------------|--------------|--------------|----------|----------|
| BICD1      | 1.204458412  | 1.634575493  | 8.85E-11 | 4.68E-10 |
| AC106782.5 | 1.63614311   | -1.77725312  | 8.86E-11 | 4.68E-10 |
| CYCSP6     | 4.174574035  | -2.990479509 | 9.13E-11 | 4.82E-10 |
| CTXN1      | 2.294391343  | -0.309055305 | 9.14E-11 | 4.83E-10 |
| NAALADL1   | 2.198333775  | 2.45668223   | 9.15E-11 | 4.83E-10 |
| CNBD2      | 1.095178361  | -1.58977935  | 9.18E-11 | 4.84E-10 |
| AL391832.1 | 2.660084886  | -1.646396014 | 9.20E-11 | 4.85E-10 |
| VCX3A      | 6.096338672  | -1.575068171 | 9.28E-11 | 4.89E-10 |
| TNNT1      | 3.562345646  | 0.383125001  | 9.39E-11 | 4.94E-10 |
| CPA2       | 8.586607952  | 2.094856561  | 9.41E-11 | 4.95E-10 |
| CACNG1     | 4.87858512   | -1.984120712 | 9.43E-11 | 4.96E-10 |
| PLA2G1B    | 2.240266341  | 0.558070433  | 9.44E-11 | 4.97E-10 |
| LINC00346  | 1.781337468  | 1.154788959  | 9.60E-11 | 5.04E-10 |
| AC079766.1 | -1.086737737 | -2.629291711 | 9.66E-11 | 5.08E-10 |
| G0S2       | -1.507083757 | 6.635253743  | 9.68E-11 | 5.08E-10 |
| FOXF2      | 2.456427406  | -0.810172751 | 9.72E-11 | 5.10E-10 |
| HTR3A      | 5.117108134  | -0.266376202 | 9.78E-11 | 5.13E-10 |
| MX1-AS1    | 6.409723646  | -1.198000304 | 9.89E-11 | 5.18E-10 |
| MSL3P1     | 1.395661303  | -0.912093307 | 9.92E-11 | 5.20E-10 |
| BPIFB2     | 4.774019335  | 3.805962665  | 1.01E-10 | 5.28E-10 |
| DRD4       | 2.023194687  | 0.355888194  | 1.01E-10 | 5.29E-10 |
| ANKRD33    | 5.229818409  | -0.16885968  | 1.01E-10 | 5.30E-10 |
| XAGE5      | 7.087213321  | -0.522979402 | 1.01E-10 | 5.30E-10 |
| ACRV1      | 1.798103455  | -2.835955916 | 1.03E-10 | 5.39E-10 |
| LINC00622  | 1.525999562  | -1.507159051 | 1.05E-10 | 5.48E-10 |
| RNF183     | 3.038870157  | -1.671779342 | 1.05E-10 | 5.51E-10 |
| TEX45      | 2.062243578  | -1.937797924 | 1.05E-10 | 5.51E-10 |
| AP002364.1 | 1.521151578  | -2.906560742 | 1.06E-10 | 5.53E-10 |
| BX322639.1 | 2.422344175  | -0.267000972 | 1.06E-10 | 5.53E-10 |
| AMH        | 2.451400708  | -0.740798253 | 1.06E-10 | 5.55E-10 |
| HBA2       | -1.56543151  | 3.29718955   | 1.07E-10 | 5.61E-10 |
| LINC01019  | 6.488094374  | -1.291385051 | 1.08E-10 | 5.64E-10 |
| KCTD17     | 1.661825809  | 3.452007228  | 1.09E-10 | 5.67E-10 |
| PLGLB1     | -1.224858482 | 1.421915172  | 1.09E-10 | 5.71E-10 |
| ZEB2P1     | 3.534470098  | -3.027982925 | 1.10E-10 | 5.74E-10 |
| AC005381.1 | 4.897161517  | -2.412880954 | 1.11E-10 | 5.77E-10 |
| SPATA25    | 1.170547382  | -0.183878286 | 1.12E-10 | 5.84E-10 |
| AC020928.1 | 2.916471557  | -2.284480499 | 1.13E-10 | 5.86E-10 |
| CABP1      | 1.711425786  | -1.703039334 | 1.13E-10 | 5.86E-10 |
| MTUS2      | -2.045656917 | -0.388320084 | 1.14E-10 | 5.93E-10 |
| COL8A1     | 1.663080221  | 2.576932923  | 1.15E-10 | 5.96E-10 |
| LEAP2      | -1.177822401 | 6.789005643  | 1.15E-10 | 5.99E-10 |
| MYH16      | 1.753977819  | -2.773892274 | 1.16E-10 | 6.01E-10 |
| LINC02525  | 5.488119179  | -2.30999783  | 1.16E-10 | 6.01E-10 |
| AC003973.3 | 2.733163042  | -0.115410054 | 1.16E-10 | 6.02E-10 |
| ABCA8      | -1.437452374 | 4.819677321  | 1.18E-10 | 6.13E-10 |
| LINC00664  | 2.705089865  | -2.207761553 | 1.19E-10 | 6.16E-10 |
| SHC3       | 1.703314375  | -0.01432522  | 1.20E-10 | 6.22E-10 |
| TRIM31     | 2.303517375  | 3.20346332   | 1.20E-10 | 6.23E-10 |
| AC234582.1 | 1.211350764  | -1.573544729 | 1.20E-10 | 6.23E-10 |
| FRG1JP     | 1.446730831  | -0.446042152 | 1.20E-10 | 6.24E-10 |
| ENPEP      | -1.056869415 | 5.485871016  | 1.21E-10 | 6.26E-10 |
| C1QC       | -1.077379563 | 6.544362824  | 1.22E-10 | 6.30E-10 |
| AL365226.2 | 5.646176476  | -1.944141028 | 1.22E-10 | 6.30E-10 |
| PLAC8L1    | 1.441691051  | -1.67933241  | 1.22E-10 | 6.33E-10 |
| TSPAN5     | 2.235134105  | 3.086570105  | 1.23E-10 | 6.36E-10 |
| CAPS       | 1.079495344  | 3.540996858  | 1.23E-10 | 6.37E-10 |
| SPON2      | 1.072865808  | 7.421500325  | 1.24E-10 | 6.41E-10 |

|            |              |              |          |          |
|------------|--------------|--------------|----------|----------|
| AL354798.1 | 3.001825798  | -0.015644488 | 1.26E-10 | 6.52E-10 |
| PIK3R2     | 1.235630814  | 0.309742527  | 1.27E-10 | 6.56E-10 |
| HOMER2P1   | 5.960553673  | -1.754459376 | 1.28E-10 | 6.59E-10 |
| HAPLN1     | 4.860954748  | -0.609634977 | 1.29E-10 | 6.64E-10 |
| SOSTDC1    | 3.018328002  | -0.644064742 | 1.29E-10 | 6.66E-10 |
| ZBED6CL    | 1.077893397  | 4.197907322  | 1.31E-10 | 6.77E-10 |
| CNTNAP4    | 4.483973483  | 0.371552646  | 1.32E-10 | 6.78E-10 |
| WNT6       | 2.807263406  | -0.756225117 | 1.32E-10 | 6.81E-10 |
| AC020765.2 | 1.196403925  | -1.366027153 | 1.33E-10 | 6.83E-10 |
| CARMIL3    | -1.200988568 | 0.820057684  | 1.33E-10 | 6.84E-10 |
| AC010168.2 | 1.131178804  | -0.192809573 | 1.35E-10 | 6.92E-10 |
| MCCC1-AS1  | 1.431647875  | -2.201638261 | 1.36E-10 | 6.99E-10 |
| H1FX-AS1   | 1.064891513  | 0.492528281  | 1.37E-10 | 7.05E-10 |
| LINC01929  | 3.454814487  | -1.667113729 | 1.39E-10 | 7.13E-10 |
| LINC02275  | -2.048813954 | -1.198689729 | 1.40E-10 | 7.21E-10 |
| AC120114.3 | 1.174978266  | -1.036308951 | 1.41E-10 | 7.23E-10 |
| TMEM47     | -1.061159809 | 4.091819445  | 1.46E-10 | 7.49E-10 |
| AL137186.2 | 1.10237004   | 0.503482306  | 1.47E-10 | 7.52E-10 |
| OR11Q1P    | 5.296065131  | -1.577604991 | 1.48E-10 | 7.56E-10 |
| CCDC183    | 1.478168472  | 0.477072433  | 1.48E-10 | 7.56E-10 |
| WFDC21P    | 2.773653829  | 0.778276015  | 1.49E-10 | 7.61E-10 |
| SIGLEC5    | -1.176456704 | -2.146615587 | 1.50E-10 | 7.65E-10 |
| AC024600.1 | -1.755040382 | -2.757379333 | 1.50E-10 | 7.69E-10 |
| KLK4       | 6.89051937   | 0.661724863  | 1.51E-10 | 7.72E-10 |
| PI16       | -1.843518887 | -1.699337453 | 1.54E-10 | 7.85E-10 |
| LINC01341  | 1.436163775  | 0.894815707  | 1.55E-10 | 7.91E-10 |
| KHK        | -1.02237605  | 7.704419634  | 1.55E-10 | 7.92E-10 |
| ILDR2      | 2.299118177  | 2.642399     | 1.56E-10 | 7.99E-10 |
| MT1M       | -2.260796053 | 5.411570549  | 1.57E-10 | 8.00E-10 |
| AL121832.2 | 1.185045933  | 0.736305126  | 1.57E-10 | 8.01E-10 |
| BHMT       | -1.616041184 | 8.623086751  | 1.59E-10 | 8.09E-10 |
| DDN-AS1    | 1.87224377   | -2.531029478 | 1.59E-10 | 8.12E-10 |
| RNU6-529P  | -1.123525186 | -2.402709404 | 1.59E-10 | 8.12E-10 |
| HIST3H2A   | 2.695834133  | 1.056932657  | 1.60E-10 | 8.13E-10 |
| LNCOC1     | 1.603835488  | -1.493629031 | 1.60E-10 | 8.15E-10 |
| TMEM249    | 1.876210006  | -2.622435896 | 1.60E-10 | 8.15E-10 |
| RPL8       | 1.135980853  | 10.42276177  | 1.62E-10 | 8.23E-10 |
| KRT20      | 6.56156519   | 2.39904613   | 1.62E-10 | 8.24E-10 |
| GXYLT2     | 2.479643675  | 0.283776591  | 1.62E-10 | 8.24E-10 |
| GAL3ST1    | 2.46942963   | 3.875878323  | 1.63E-10 | 8.30E-10 |
| HOXB13     | 5.748588808  | -0.457748341 | 1.64E-10 | 8.34E-10 |
| FAM87A     | 3.059947168  | -2.370792213 | 1.64E-10 | 8.35E-10 |
| AL109976.1 | 2.185148911  | -1.879991013 | 1.65E-10 | 8.38E-10 |
| SLC6A17    | 2.964985785  | -1.599536474 | 1.65E-10 | 8.39E-10 |
| CMBL       | -1.078917913 | 7.398447923  | 1.66E-10 | 8.44E-10 |
| AL441992.1 | 1.01396654   | 0.696155761  | 1.67E-10 | 8.46E-10 |
| AC015922.3 | -1.023514363 | -0.878703607 | 1.67E-10 | 8.49E-10 |
| PDZK1IP1   | 2.981708267  | 5.738244349  | 1.68E-10 | 8.53E-10 |
| AC137723.2 | -1.546880704 | -0.680409236 | 1.69E-10 | 8.56E-10 |
| GAP43      | 2.847686056  | -1.960183755 | 1.71E-10 | 8.68E-10 |
| PODNL1     | 1.765590561  | -0.837869738 | 1.72E-10 | 8.72E-10 |
| TCAP       | 1.995957127  | 1.188099844  | 1.72E-10 | 8.72E-10 |
| AC012435.1 | 1.207131319  | -2.531328785 | 1.74E-10 | 8.79E-10 |
| SULT1C2P1  | 2.751946665  | -2.719327215 | 1.76E-10 | 8.90E-10 |
| AC021146.9 | -1.523630466 | 1.021197597  | 1.76E-10 | 8.92E-10 |
| DGCR9      | 2.068577096  | -1.174713506 | 1.77E-10 | 8.96E-10 |
| KLF4       | -1.161418667 | 3.512920492  | 1.78E-10 | 8.98E-10 |
| AC108134.2 | 1.386087972  | -1.286894342 | 1.80E-10 | 9.07E-10 |

|             |              |              |          |          |
|-------------|--------------|--------------|----------|----------|
| AC020917.4  | 1.069029394  | -0.581094765 | 1.80E-10 | 9.07E-10 |
| C5orf30     | 1.689620371  | 1.640556034  | 1.80E-10 | 9.10E-10 |
| AC018755.4  | -1.587515935 | -2.050826973 | 1.81E-10 | 9.12E-10 |
| KLHL30      | 2.467926804  | -0.343253517 | 1.82E-10 | 9.19E-10 |
| TUBA3C      | 7.20258311   | 1.451992088  | 1.84E-10 | 9.30E-10 |
| AL035252.3  | 1.641367058  | -0.862836574 | 1.88E-10 | 9.47E-10 |
| ARHGEF37    | 1.459078405  | 3.027870439  | 1.89E-10 | 9.54E-10 |
| B3GALT1     | 4.39015305   | -0.771372165 | 1.90E-10 | 9.58E-10 |
| AC245060.5  | 1.221832784  | -0.733434926 | 1.92E-10 | 9.66E-10 |
| KCNE1       | -1.43436015  | -1.924036936 | 1.92E-10 | 9.68E-10 |
| APOA1       | -1.359868267 | 12.9530708   | 1.93E-10 | 9.72E-10 |
| NPTX1       | 3.763356213  | -1.190391954 | 1.97E-10 | 9.92E-10 |
| PKD1L2      | 2.566350469  | 1.126423088  | 1.99E-10 | 9.99E-10 |
| AC010148.1  | 1.730112459  | -1.792655173 | 2.00E-10 | 1.00E-09 |
| LINC01630   | 5.092379679  | -2.056753687 | 2.02E-10 | 1.02E-09 |
| DHDH        | 1.952806655  | -1.017327961 | 2.03E-10 | 1.02E-09 |
| SUCLG2P2    | -1.082583622 | -1.328980175 | 2.03E-10 | 1.02E-09 |
| SSX5        | 6.004956985  | -2.106759095 | 2.05E-10 | 1.03E-09 |
| MAGEA11     | 7.071509236  | -0.875299377 | 2.05E-10 | 1.03E-09 |
| TMEM132D-AS | 7.465254736  | -0.424769338 | 2.05E-10 | 1.03E-09 |
| AC092683.1  | 1.794491694  | -2.849525524 | 2.05E-10 | 1.03E-09 |
| RPL12P35    | 2.149817537  | -2.584369648 | 2.05E-10 | 1.03E-09 |
| SLC6A7      | 2.995953896  | -2.214340506 | 2.06E-10 | 1.03E-09 |
| PIEZO2      | 1.137383345  | 4.620063614  | 2.07E-10 | 1.04E-09 |
| HIST1H2BE   | 1.670064228  | -2.782780666 | 2.08E-10 | 1.04E-09 |
| LUZP2       | 4.249380632  | -0.091126467 | 2.09E-10 | 1.05E-09 |
| KCNH2       | 3.580996209  | 1.434960516  | 2.09E-10 | 1.05E-09 |
| DCC         | 4.092173124  | -0.418192823 | 2.10E-10 | 1.05E-09 |
| RBPJL       | 7.329979094  | 1.118387271  | 2.14E-10 | 1.07E-09 |
| HOMER3      | 1.237448663  | 3.41541084   | 2.15E-10 | 1.08E-09 |
| FAM96AP2    | 2.383847467  | -2.011785544 | 2.16E-10 | 1.08E-09 |
| TMEM163     | 3.382773517  | 1.970632429  | 2.17E-10 | 1.09E-09 |
| PLAG1       | 1.821628473  | 1.15384294   | 2.19E-10 | 1.09E-09 |
| SLC7A11-AS1 | 3.733577579  | -2.834767481 | 2.19E-10 | 1.09E-09 |
| TFR2        | -1.027319564 | 9.574566248  | 2.20E-10 | 1.10E-09 |
| REG1B       | 10.50171311  | 3.060653961  | 2.23E-10 | 1.11E-09 |
| PAIP1P1     | 1.305888051  | -2.172040194 | 2.26E-10 | 1.12E-09 |
| AP002360.1  | 1.100512093  | 1.456511459  | 2.31E-10 | 1.15E-09 |
| AC104170.1  | -1.083915554 | -1.542799129 | 2.33E-10 | 1.16E-09 |
| AP001830.1  | 1.202576607  | -0.022704249 | 2.35E-10 | 1.17E-09 |
| PGGHG       | 1.647343958  | 5.72968835   | 2.39E-10 | 1.19E-09 |
| KISS1       | 1.729209762  | 1.026955143  | 2.39E-10 | 1.19E-09 |
| ESYT3       | 2.199108963  | 0.184262663  | 2.39E-10 | 1.19E-09 |
| ERICH4      | 4.164304744  | -2.737414929 | 2.39E-10 | 1.19E-09 |
| AC034213.1  | 3.842710844  | -1.945038488 | 2.41E-10 | 1.20E-09 |
| AL391095.2  | -1.302671309 | 2.083077431  | 2.44E-10 | 1.21E-09 |
| PTPN14      | 1.213555185  | 3.260278824  | 2.46E-10 | 1.22E-09 |
| MSH4        | 2.196055999  | -2.665627246 | 2.49E-10 | 1.23E-09 |
| KCNJ11      | 1.717317371  | 1.444653386  | 2.49E-10 | 1.23E-09 |
| C4orf48     | 1.88648932   | 0.693545158  | 2.51E-10 | 1.24E-09 |
| AC113368.1  | -1.402923646 | -2.284451587 | 2.52E-10 | 1.25E-09 |
| AOX3P       | 2.317363439  | -0.964603176 | 2.52E-10 | 1.25E-09 |
| NALT1       | 1.345303887  | -0.330186641 | 2.56E-10 | 1.27E-09 |
| COL11A1     | 3.911708213  | 1.387271232  | 2.58E-10 | 1.27E-09 |
| B9D1        | 1.039530876  | 3.139861195  | 2.59E-10 | 1.28E-09 |
| SVEP1       | -1.496013429 | 2.723848581  | 2.59E-10 | 1.28E-09 |
| APOBEC3B    | 1.879144043  | 1.800731073  | 2.61E-10 | 1.29E-09 |
| CLTCL1      | 1.152696208  | 3.644045822  | 2.63E-10 | 1.30E-09 |

|            |              |              |          |          |
|------------|--------------|--------------|----------|----------|
| SSTR5      | 5.765576544  | -0.135375479 | 2.64E-10 | 1.30E-09 |
| TNFSF15    | 1.872859833  | 1.058476882  | 2.66E-10 | 1.31E-09 |
| GNRH1      | 1.010480057  | -1.096742945 | 2.66E-10 | 1.31E-09 |
| MDGA1      | 2.125740446  | 2.457596177  | 2.67E-10 | 1.31E-09 |
| MTRNR2L8   | -1.288939051 | -0.452015245 | 2.67E-10 | 1.31E-09 |
| NRG1       | -1.891726058 | 2.727146058  | 2.67E-10 | 1.32E-09 |
| WDR88      | 1.033107189  | -0.889438188 | 2.69E-10 | 1.33E-09 |
| SHISA2     | 2.359749894  | -1.34188749  | 2.70E-10 | 1.33E-09 |
| LOX        | 1.630089215  | 2.970092723  | 2.71E-10 | 1.33E-09 |
| DSCR4      | 6.990613575  | -1.294662601 | 2.71E-10 | 1.33E-09 |
| AL133370.1 | 4.409239916  | -2.393090219 | 2.72E-10 | 1.34E-09 |
| AC087289.2 | 1.096605939  | -1.930641436 | 2.75E-10 | 1.35E-09 |
| FAM186A    | 1.385253714  | -1.460311455 | 2.77E-10 | 1.36E-09 |
| AC022532.1 | 1.604998531  | -2.024216815 | 2.77E-10 | 1.36E-09 |
| GRIK4      | 2.584530138  | -0.429114939 | 2.77E-10 | 1.36E-09 |
| SLC2A2     | -1.166105745 | 8.633758795  | 2.78E-10 | 1.36E-09 |
| RPS10P5    | 1.608553842  | -2.50801835  | 2.78E-10 | 1.37E-09 |
| AF196972.1 | 1.309267318  | -2.259304287 | 2.83E-10 | 1.39E-09 |
| NT5C1B     | -1.051945389 | -2.032185535 | 2.83E-10 | 1.39E-09 |
| AL139289.1 | 1.227141995  | -2.10656037  | 2.84E-10 | 1.39E-09 |
| ASPSCR1    | 1.23229534   | 6.456372805  | 2.85E-10 | 1.39E-09 |
| LINC01979  | -1.624408632 | -0.958031379 | 2.85E-10 | 1.40E-09 |
| CELA3A     | 6.024515679  | -1.352418811 | 2.87E-10 | 1.40E-09 |
| AC005618.1 | 1.892139671  | -2.178468226 | 2.92E-10 | 1.43E-09 |
| PDZD7      | 1.419212934  | -1.390257034 | 2.94E-10 | 1.44E-09 |
| DGAT2      | -1.069351395 | 7.401448793  | 2.95E-10 | 1.44E-09 |
| C22orf23   | 1.108408632  | -1.281991482 | 2.95E-10 | 1.44E-09 |
| TDGF1      | 2.501241901  | 3.018062631  | 2.97E-10 | 1.45E-09 |
| CHGB       | 5.038482044  | 0.659784576  | 2.98E-10 | 1.45E-09 |
| PRKAA2     | 1.894995795  | 3.615687043  | 2.98E-10 | 1.46E-09 |
| AC018553.1 | 2.65864132   | -0.362359695 | 2.99E-10 | 1.46E-09 |
| SHISA4     | 1.402263353  | 3.793521934  | 3.02E-10 | 1.48E-09 |
| Z99289.1   | -1.61753741  | -2.745453853 | 3.03E-10 | 1.48E-09 |
| PLEKHS1    | 3.673133954  | -0.004414306 | 3.04E-10 | 1.48E-09 |
| DLX2       | 4.350182724  | -2.236196011 | 3.04E-10 | 1.48E-09 |
| NRXN1      | -2.211478007 | -2.868969021 | 3.09E-10 | 1.51E-09 |
| EDARADD    | 2.259709845  | 0.540263963  | 3.11E-10 | 1.51E-09 |
| AC004160.2 | -2.005373821 | -2.554187078 | 3.11E-10 | 1.52E-09 |
| CAND2      | -1.385319726 | 0.8515072    | 3.19E-10 | 1.55E-09 |
| WNT11      | -1.509655984 | 2.231101465  | 3.19E-10 | 1.55E-09 |
| CACNA1S    | 2.658839334  | -2.655026798 | 3.22E-10 | 1.57E-09 |
| ZNF541     | 2.265951641  | 0.727242993  | 3.26E-10 | 1.59E-09 |
| MAPT-IT1   | 2.624339172  | -2.875682175 | 3.28E-10 | 1.59E-09 |
| SELENOM    | 1.753462002  | 5.122680646  | 3.29E-10 | 1.60E-09 |
| ZIC4       | 3.410393985  | 0.936061763  | 3.30E-10 | 1.60E-09 |
| CST2       | 3.014004955  | -1.377825311 | 3.30E-10 | 1.61E-09 |
| AC010809.2 | 1.182283717  | -1.551066222 | 3.32E-10 | 1.61E-09 |
| ABLIM2     | 1.441897333  | 2.211431907  | 3.32E-10 | 1.61E-09 |
| ZNF233     | 1.513527921  | -0.099082515 | 3.33E-10 | 1.62E-09 |
| AC022400.7 | 1.035082836  | 1.499521063  | 3.35E-10 | 1.63E-09 |
| AL662844.3 | 1.456557716  | -2.984368452 | 3.37E-10 | 1.63E-09 |
| Z84485.1   | 1.342773632  | -1.178871707 | 3.37E-10 | 1.63E-09 |
| KIF28P     | 1.547914158  | -1.164535618 | 3.42E-10 | 1.66E-09 |
| LHFPL4     | 4.462602062  | -0.053735439 | 3.42E-10 | 1.66E-09 |
| PGBD1      | 1.046878415  | 2.119198297  | 3.57E-10 | 1.72E-09 |
| PTGES3L    | 1.648808938  | -2.124960692 | 3.57E-10 | 1.73E-09 |
| AC097634.1 | 1.701950043  | -2.899439141 | 3.59E-10 | 1.73E-09 |
| AC124944.2 | 1.924355987  | -2.590705064 | 3.60E-10 | 1.74E-09 |



|             |              |              |          |          |
|-------------|--------------|--------------|----------|----------|
| AC141557.2  | 2.128989423  | -3.001056962 | 3.61E-10 | 1.74E-09 |
| AC112907.2  | 1.677395218  | -2.440212203 | 3.66E-10 | 1.77E-09 |
| ZSCAN31     | 1.371080951  | 3.516857332  | 3.74E-10 | 1.80E-09 |
| AC105105.2  | -1.108701362 | 0.859976281  | 3.76E-10 | 1.81E-09 |
| LVRN        | 2.377149406  | -2.258120222 | 3.78E-10 | 1.82E-09 |
| NAT14       | 1.238536983  | 2.676874111  | 3.79E-10 | 1.83E-09 |
| PURPL       | 2.415193679  | 0.566247455  | 3.86E-10 | 1.86E-09 |
| AC108136.1  | 2.823285748  | -1.868925193 | 3.89E-10 | 1.87E-09 |
| LINC00941   | 2.662601607  | -1.547493053 | 3.90E-10 | 1.87E-09 |
| AC097461.1  | 1.168767301  | -1.033935289 | 3.94E-10 | 1.89E-09 |
| AL161669.3  | 1.375420943  | -0.00636212  | 3.99E-10 | 1.91E-09 |
| ZNF385D-AS1 | 5.424538148  | -2.988250583 | 4.01E-10 | 1.93E-09 |
| AC004923.4  | 1.441427652  | -2.635913096 | 4.03E-10 | 1.93E-09 |
| ZNF85       | 1.362458494  | 0.275187645  | 4.07E-10 | 1.95E-09 |
| KRTAP5-1    | 2.264203316  | -2.805305196 | 4.08E-10 | 1.96E-09 |
| CREB3L1     | 2.334889307  | 2.680080766  | 4.09E-10 | 1.96E-09 |
| ZNF192P1    | 1.50590968   | -1.283903981 | 4.11E-10 | 1.97E-09 |
| LINC01431   | 1.222339748  | -1.308790459 | 4.13E-10 | 1.98E-09 |
| CD180       | -1.035939274 | 1.123450354  | 4.16E-10 | 1.99E-09 |
| ERC2        | 3.024538529  | -2.085077264 | 4.16E-10 | 1.99E-09 |
| MAP1A       | 1.758149855  | 1.742713747  | 4.16E-10 | 1.99E-09 |
| CHRN2       | 2.190004471  | -2.160845041 | 4.18E-10 | 2.00E-09 |
| POLH-AS1    | 1.04157441   | -1.682063254 | 4.20E-10 | 2.01E-09 |
| PLCD3       | 1.357842301  | 2.598091895  | 4.21E-10 | 2.01E-09 |
| KRTAP5-5    | 5.439441355  | -2.537312362 | 4.26E-10 | 2.03E-09 |
| VEGFD       | 2.681535799  | 2.24018654   | 4.28E-10 | 2.04E-09 |
| PKP4-AS1    | 1.483823842  | -2.884151166 | 4.30E-10 | 2.05E-09 |
| FRMD3       | 1.898990943  | 2.291362597  | 4.38E-10 | 2.09E-09 |
| CHODL       | 3.847589135  | -0.146222424 | 4.39E-10 | 2.09E-09 |
| PDGFRA      | -1.602842156 | 3.744867087  | 4.42E-10 | 2.11E-09 |
| SEMA6D      | -1.174630711 | 1.341659651  | 4.47E-10 | 2.13E-09 |
| PLEKHN1     | 1.786682991  | -0.039149892 | 4.47E-10 | 2.13E-09 |
| UGT1A10     | 4.994411867  | 0.203965911  | 4.47E-10 | 2.13E-09 |
| CR381653.1  | 1.292332916  | -1.65724004  | 4.50E-10 | 2.14E-09 |
| LGI3        | 3.239248065  | -0.31503091  | 4.51E-10 | 2.15E-09 |
| AC020907.1  | 1.983390829  | -0.193814536 | 4.65E-10 | 2.21E-09 |
| PTGES       | 2.698447533  | 2.176231327  | 4.72E-10 | 2.24E-09 |
| SULT4A1     | 4.523215241  | 1.290012388  | 4.73E-10 | 2.25E-09 |
| LIPG        | -1.109105361 | 5.372146205  | 4.79E-10 | 2.27E-09 |
| AC096564.1  | -1.276318641 | -2.271981441 | 4.85E-10 | 2.30E-09 |
| AC020907.4  | 1.659453611  | -2.544133652 | 4.87E-10 | 2.31E-09 |
| EYA1        | 3.936205812  | -1.711690631 | 4.87E-10 | 2.31E-09 |
| AL391244.2  | 1.911436447  | -2.764825882 | 4.89E-10 | 2.32E-09 |
| TSPEAR      | 1.934452897  | -0.404117182 | 4.90E-10 | 2.32E-09 |
| CCDC196     | -1.984457533 | -0.316384479 | 5.01E-10 | 2.37E-09 |
| LINC01091   | 1.891116472  | -0.906413247 | 5.02E-10 | 2.37E-09 |
| LINC01730   | 1.89337114   | -2.633727729 | 5.05E-10 | 2.39E-09 |
| INSRR       | 3.100690353  | -2.219699712 | 5.09E-10 | 2.41E-09 |
| IGFBP1      | -1.379119471 | 9.574666718  | 5.12E-10 | 2.42E-09 |
| CAPN12      | 1.538471739  | 3.680700198  | 5.16E-10 | 2.44E-09 |
| SPP2        | -1.61755124  | 6.690040895  | 5.20E-10 | 2.46E-09 |
| MSC         | 2.574312772  | 3.836448419  | 5.22E-10 | 2.47E-09 |
| KLF2P1      | 5.529106811  | -2.668808303 | 5.26E-10 | 2.48E-09 |
| MC1R        | 1.175004204  | 0.772260478  | 5.33E-10 | 2.51E-09 |
| SLC5A11     | 2.367076627  | 1.261279631  | 5.33E-10 | 2.52E-09 |
| LINC00862   | 1.637044051  | -1.139471652 | 5.33E-10 | 2.52E-09 |
| TMEM132B    | 2.658149047  | -0.71890791  | 5.34E-10 | 2.52E-09 |
| MYEF2       | 2.288125817  | 1.420984922  | 5.35E-10 | 2.52E-09 |

|            |              |              |          |          |
|------------|--------------|--------------|----------|----------|
| AVIL       | 2.052941377  | 2.90271732   | 5.42E-10 | 2.55E-09 |
| FABP6      | 4.364188773  | -1.321333361 | 5.48E-10 | 2.58E-09 |
| C15orf48   | 2.299341211  | 2.608489006  | 5.50E-10 | 2.59E-09 |
| C16orf89   | 3.739214572  | 1.79695429   | 5.56E-10 | 2.62E-09 |
| ESPL1      | 1.379923871  | 3.250762935  | 5.60E-10 | 2.63E-09 |
| RBP4       | -1.029575817 | 12.35331691  | 5.61E-10 | 2.64E-09 |
| AC233280.2 | 1.959092735  | -2.979265188 | 5.61E-10 | 2.64E-09 |
| PLPPR1     | 1.649137702  | 4.082629025  | 5.61E-10 | 2.64E-09 |
| CA8        | 2.26883043   | -0.924954695 | 5.79E-10 | 2.72E-09 |
| AC005186.1 | 5.153580039  | -0.783541911 | 5.86E-10 | 2.75E-09 |
| AP001273.1 | 1.017159785  | -0.507654802 | 5.89E-10 | 2.76E-09 |
| CASC8      | 3.506053253  | -2.20905235  | 6.01E-10 | 2.82E-09 |
| AC073263.1 | 2.227208232  | -2.754911334 | 6.12E-10 | 2.87E-09 |
| CORIN      | 2.354791833  | 0.162324074  | 6.18E-10 | 2.90E-09 |
| BSND       | 3.629100495  | -2.724249878 | 6.24E-10 | 2.92E-09 |
| CHRNA3     | 3.918044804  | -1.6397706   | 6.25E-10 | 2.93E-09 |
| SLC16A3    | 1.676047968  | 4.417092312  | 6.37E-10 | 2.98E-09 |
| RBMV2FP    | 6.833429412  | -1.875786302 | 6.38E-10 | 2.99E-09 |
| AC139769.2 | 4.575779724  | -1.656429604 | 6.39E-10 | 2.99E-09 |
| NAV3       | 2.243781255  | 2.373785409  | 6.40E-10 | 2.99E-09 |
| AC018665.1 | 1.394888178  | -0.25016116  | 6.45E-10 | 3.02E-09 |
| TAGAP      | -1.107332505 | 1.262935787  | 6.56E-10 | 3.06E-09 |
| FAM99A     | -1.897008132 | 3.97660719   | 6.58E-10 | 3.07E-09 |
| LINC00648  | 5.235738812  | -1.04816908  | 6.58E-10 | 3.07E-09 |
| SLC25A5P1  | 1.28421134   | -2.473711662 | 6.71E-10 | 3.13E-09 |
| AC007405.1 | 1.234071635  | -1.607796046 | 6.74E-10 | 3.14E-09 |
| AC020915.2 | 1.469342538  | -2.683003403 | 6.76E-10 | 3.15E-09 |
| ARR3       | 1.313004187  | -2.616463444 | 6.80E-10 | 3.17E-09 |
| AMBN       | 7.781825546  | -0.185785228 | 6.82E-10 | 3.17E-09 |
| GAST       | 7.826999671  | -0.121206517 | 6.83E-10 | 3.18E-09 |
| AL356512.1 | 1.229881352  | -1.931184383 | 6.85E-10 | 3.19E-09 |
| AL133467.4 | 4.600563348  | -3.055456931 | 6.85E-10 | 3.19E-09 |
| AC120498.4 | 1.30990455   | 0.269784032  | 6.86E-10 | 3.19E-09 |
| SLC38A8    | 4.990010183  | -1.357102693 | 6.87E-10 | 3.20E-09 |
| TKFC       | -1.090371792 | 7.404945406  | 6.93E-10 | 3.22E-09 |
| CA12       | 2.825654284  | 4.416228806  | 6.98E-10 | 3.24E-09 |
| FNDC4      | -1.074800928 | 5.656902061  | 6.98E-10 | 3.24E-09 |
| AL139125.2 | 2.370143512  | -1.999630778 | 6.99E-10 | 3.24E-09 |
| MAP2       | 1.571019627  | 4.307123698  | 7.02E-10 | 3.26E-09 |
| CTAGE7P    | 1.325098703  | -2.318700832 | 7.05E-10 | 3.27E-09 |
| PAGE2B     | 6.21218197   | 1.226463189  | 7.06E-10 | 3.27E-09 |
| AP006216.2 | -1.47345334  | -0.635612692 | 7.09E-10 | 3.29E-09 |
| XDH        | -1.283579499 | 6.053419539  | 7.11E-10 | 3.30E-09 |
| ANG        | -1.171749253 | 8.877437948  | 7.14E-10 | 3.31E-09 |
| IL11       | 3.681710098  | -0.289415375 | 7.15E-10 | 3.31E-09 |
| HIST1H4I   | 1.032427445  | 3.696756317  | 7.17E-10 | 3.32E-09 |
| CFAP61     | 2.906536275  | -2.336153364 | 7.19E-10 | 3.33E-09 |
| AC114485.1 | 5.892872112  | -2.646815491 | 7.23E-10 | 3.35E-09 |
| CKB        | 2.050887611  | 5.701002801  | 7.30E-10 | 3.38E-09 |
| TGM4       | 3.146943168  | -2.416500138 | 7.31E-10 | 3.38E-09 |
| KISS1R     | 4.226379038  | -1.428027736 | 7.36E-10 | 3.40E-09 |
| AC092809.4 | 1.324088819  | -2.442069794 | 7.38E-10 | 3.41E-09 |
| B4GALNT4   | 3.649660115  | 1.496853953  | 7.42E-10 | 3.43E-09 |
| TMEM74     | 1.667626389  | 0.677998501  | 7.50E-10 | 3.46E-09 |
| MMP10      | 3.541181919  | 0.095737851  | 7.50E-10 | 3.46E-09 |
| AC114811.2 | 3.574480805  | -1.983304302 | 7.51E-10 | 3.47E-09 |
| ARMC9      | 1.037848851  | 1.461134269  | 7.51E-10 | 3.47E-09 |
| PRR16      | 1.338515033  | -0.571790282 | 7.59E-10 | 3.50E-09 |

|            |              |              |          |          |
|------------|--------------|--------------|----------|----------|
| GABRG2     | 5.666423857  | -1.942929634 | 7.60E-10 | 3.51E-09 |
| SCARA3     | 1.547769552  | 4.169450788  | 7.61E-10 | 3.51E-09 |
| AL109811.1 | 1.341268802  | -2.960150917 | 7.70E-10 | 3.55E-09 |
| AC110285.1 | 1.905065928  | -2.895860294 | 7.79E-10 | 3.59E-09 |
| PPP1R14C   | 4.111689815  | -0.447786591 | 7.83E-10 | 3.61E-09 |
| PRTFDC1    | 1.236777242  | 1.321643702  | 7.89E-10 | 3.64E-09 |
| ABCA17P    | 2.147503419  | -1.411570371 | 7.93E-10 | 3.65E-09 |
| FAM3B      | 3.05104557   | 4.159661568  | 7.97E-10 | 3.67E-09 |
| CPN2       | -1.097867391 | 7.92587682   | 8.10E-10 | 3.72E-09 |
| AC024940.1 | 3.613116047  | -1.624919482 | 8.13E-10 | 3.74E-09 |
| FAM230C    | 5.938898252  | -2.139482412 | 8.24E-10 | 3.78E-09 |
| MT3        | 4.154683093  | -0.287881331 | 8.25E-10 | 3.79E-09 |
| SATB2-AS1  | 1.710590086  | -2.015006466 | 8.33E-10 | 3.82E-09 |
| AZGP1P1    | -1.212260034 | 3.539879806  | 8.35E-10 | 3.83E-09 |
| PRAMEF4    | 5.204220594  | -0.123860272 | 8.35E-10 | 3.83E-09 |
| FERMT1     | 2.258578077  | 2.145448472  | 8.39E-10 | 3.85E-09 |
| SMIM25     | -1.215756396 | 0.627031542  | 8.42E-10 | 3.86E-09 |
| DGUOK-AS1  | 1.126930449  | -1.620803367 | 8.60E-10 | 3.94E-09 |
| AC126323.1 | 3.276665973  | -0.35835847  | 8.64E-10 | 3.96E-09 |
| FAM21EP    | 1.050398821  | -1.785892784 | 8.74E-10 | 4.00E-09 |
| ASNS       | 1.714710974  | 3.136187696  | 8.80E-10 | 4.02E-09 |
| AP003174.1 | 2.071151732  | -2.156659315 | 8.91E-10 | 4.07E-09 |
| AC139491.2 | 2.079429888  | 0.480694605  | 8.93E-10 | 4.08E-09 |
| LRRC26     | 3.81522569   | -2.309413428 | 8.94E-10 | 4.08E-09 |
| RNF144A    | 1.131166711  | 2.447445182  | 8.94E-10 | 4.08E-09 |
| A1BG       | -1.226939761 | 6.696821391  | 8.95E-10 | 4.08E-09 |
| AC124067.4 | 3.051521388  | -0.289139662 | 8.98E-10 | 4.10E-09 |
| AC104260.2 | -1.271311304 | -2.732421282 | 9.00E-10 | 4.11E-09 |
| PTPRVP     | 1.275783195  | -2.208163892 | 9.00E-10 | 4.11E-09 |
| STAMBPL1   | 1.150835142  | 2.033168633  | 9.07E-10 | 4.14E-09 |
| MCTP1      | 1.550285435  | 2.732077035  | 9.08E-10 | 4.14E-09 |
| G2E3-AS1   | 5.037081121  | -2.231776137 | 9.10E-10 | 4.15E-09 |
| GRIN1      | 2.899950644  | -2.39799924  | 9.10E-10 | 4.15E-09 |
| AL359075.1 | 2.096303183  | -2.871234507 | 9.14E-10 | 4.17E-09 |
| CPA1       | 7.09784727   | 2.011814936  | 9.22E-10 | 4.20E-09 |
| INAVA      | 2.406337332  | 2.57514149   | 9.24E-10 | 4.21E-09 |
| ZNF431     | 1.098741573  | 1.710650033  | 9.25E-10 | 4.21E-09 |
| DPYS       | -1.22681867  | 7.975017006  | 9.35E-10 | 4.26E-09 |
| PLK5       | 2.160573496  | -2.5298143   | 9.40E-10 | 4.28E-09 |
| TSPAN10    | 1.662219009  | 1.805324396  | 9.44E-10 | 4.30E-09 |
| AQP10      | 4.39092778   | -0.644825964 | 9.61E-10 | 4.37E-09 |
| C10orf95   | 1.199974566  | -2.516113201 | 9.66E-10 | 4.39E-09 |
| AL021328.1 | -2.118989431 | -0.121386538 | 9.69E-10 | 4.40E-09 |
| LYZ        | 2.194801492  | 8.034336822  | 9.78E-10 | 4.44E-09 |
| LINC01436  | 3.420729114  | 0.311422962  | 9.85E-10 | 4.47E-09 |
| GSTA4      | 1.065481333  | 4.601844743  | 9.88E-10 | 4.49E-09 |
| MCIDAS     | 3.465420379  | -3.044827758 | 9.89E-10 | 4.49E-09 |
| CIB2       | 1.626455182  | 1.345438478  | 9.96E-10 | 4.52E-09 |
| C9orf57    | 3.825733729  | -1.638062519 | 9.98E-10 | 4.53E-09 |
| AP1M2      | 3.065450583  | 3.939750511  | 9.98E-10 | 4.53E-09 |
| AP006284.1 | 1.304846367  | 0.651187139  | 1.00E-09 | 4.54E-09 |
| AC004492.1 | 1.054111505  | -2.127696207 | 1.01E-09 | 4.59E-09 |
| HES5       | 1.696323455  | -2.384880741 | 1.03E-09 | 4.65E-09 |
| AP005901.1 | 5.117248146  | -2.995156365 | 1.03E-09 | 4.65E-09 |
| PAGE5      | 3.902378622  | 2.00549279   | 1.03E-09 | 4.65E-09 |
| ABCA3      | 1.634054142  | 3.218081221  | 1.03E-09 | 4.68E-09 |
| AC006065.4 | 5.732447355  | -1.478340613 | 1.03E-09 | 4.68E-09 |
| TET1       | 1.428667713  | 0.442207447  | 1.04E-09 | 4.70E-09 |

|            |              |              |          |          |
|------------|--------------|--------------|----------|----------|
| LINC02327  | 4.52879936   | -2.561810262 | 1.04E-09 | 4.71E-09 |
| ADGRD1-AS1 | 6.174674641  | -1.859737687 | 1.04E-09 | 4.72E-09 |
| RNF17      | 5.498721632  | -0.941147004 | 1.04E-09 | 4.72E-09 |
| HIST1H2AG  | 2.148051154  | 1.788383088  | 1.06E-09 | 4.78E-09 |
| DLK1       | 7.021931625  | 6.996532129  | 1.06E-09 | 4.78E-09 |
| NPHS1      | 4.297284738  | -1.318556637 | 1.07E-09 | 4.81E-09 |
| AC133644.2 | 2.410186599  | -2.255104027 | 1.07E-09 | 4.83E-09 |
| IDO2       | -1.86221996  | 1.015725382  | 1.07E-09 | 4.83E-09 |
| TFAP2E     | 1.597998137  | -1.339696    | 1.07E-09 | 4.84E-09 |
| GCNT3      | 2.533958548  | 2.68588942   | 1.08E-09 | 4.85E-09 |
| AC103740.1 | -1.359548944 | 1.904193003  | 1.08E-09 | 4.88E-09 |
| SERPINA4   | -1.176587581 | 7.981722231  | 1.09E-09 | 4.90E-09 |
| AP001453.2 | 1.404191975  | -0.576425063 | 1.09E-09 | 4.91E-09 |
| EXTL3-AS1  | 1.231376847  | -1.53863983  | 1.09E-09 | 4.91E-09 |
| AC105052.2 | 1.255436479  | -1.767384081 | 1.09E-09 | 4.92E-09 |
| C1orf220   | 1.250104886  | -0.620321191 | 1.10E-09 | 4.93E-09 |
| PROK1      | 4.472522547  | 0.649742579  | 1.10E-09 | 4.95E-09 |
| CCR3       | 3.654684982  | -1.10983058  | 1.11E-09 | 4.99E-09 |
| RCOR2      | 2.314364128  | -0.367992431 | 1.12E-09 | 5.05E-09 |
| AC124947.2 | 1.36001192   | 0.448850111  | 1.13E-09 | 5.06E-09 |
| TTC39A-AS1 | 2.331809964  | -2.624166938 | 1.13E-09 | 5.09E-09 |
| AL139011.2 | -1.167735601 | -1.872643668 | 1.14E-09 | 5.11E-09 |
| TYRP1      | 4.045730035  | -0.414647459 | 1.14E-09 | 5.12E-09 |
| AC006449.5 | 1.217085141  | -1.668222518 | 1.14E-09 | 5.13E-09 |
| ADAM12     | 2.25063256   | 1.583549715  | 1.15E-09 | 5.14E-09 |
| ABCC4      | 1.586618196  | 3.455750292  | 1.15E-09 | 5.15E-09 |
| AC026254.2 | 1.61606833   | -2.849734402 | 1.17E-09 | 5.24E-09 |
| GGN        | 1.532721366  | -2.241760921 | 1.17E-09 | 5.24E-09 |
| BCAS1      | 2.448534218  | 1.493282624  | 1.18E-09 | 5.26E-09 |
| AC135506.1 | 1.183288563  | -0.955259204 | 1.18E-09 | 5.30E-09 |
| TYMSOS     | 1.288403195  | 1.333842722  | 1.19E-09 | 5.32E-09 |
| GNGT1      | 4.743304184  | -2.021337535 | 1.20E-09 | 5.35E-09 |
| UCKL1-AS1  | 1.350444455  | -1.79114526  | 1.22E-09 | 5.43E-09 |
| SOX9-AS1   | 1.824756042  | 2.699872217  | 1.23E-09 | 5.51E-09 |
| SYT5       | 2.567335238  | -1.537499962 | 1.25E-09 | 5.57E-09 |
| AC139887.1 | 1.278263995  | -2.404537493 | 1.25E-09 | 5.58E-09 |
| UPK1A-AS1  | 3.316362753  | -2.017116922 | 1.25E-09 | 5.59E-09 |
| AC006504.8 | 1.137394324  | -1.260762379 | 1.25E-09 | 5.59E-09 |
| MIR9-3HG   | 2.929344379  | 0.772018599  | 1.28E-09 | 5.70E-09 |
| PLEKHG4B   | 2.984281587  | -0.116351564 | 1.28E-09 | 5.70E-09 |
| MLANA      | 2.979728762  | 1.196590345  | 1.29E-09 | 5.73E-09 |
| TTYH3      | 1.003094415  | 6.03652286   | 1.29E-09 | 5.73E-09 |
| TLX2       | 3.65178066   | -2.877310917 | 1.30E-09 | 5.79E-09 |
| CALCA      | 4.01994225   | 2.502490034  | 1.31E-09 | 5.83E-09 |
| SLC6A3     | 4.79722882   | -0.748709926 | 1.33E-09 | 5.90E-09 |
| AGXT       | -1.205557599 | 10.3504468   | 1.33E-09 | 5.92E-09 |
| CTAG2      | 6.416252573  | 2.13729562   | 1.34E-09 | 5.96E-09 |
| AL121583.1 | 1.353059914  | -2.559997212 | 1.36E-09 | 6.03E-09 |
| TREM2      | 1.585049265  | 2.217610218  | 1.37E-09 | 6.06E-09 |
| NFATC4     | 1.303981425  | 2.570111319  | 1.37E-09 | 6.06E-09 |
| FBXL16     | 2.403382672  | 1.533541874  | 1.37E-09 | 6.08E-09 |
| CFHR3      | -1.585221822 | 7.076197137  | 1.40E-09 | 6.22E-09 |
| DLX4       | 2.610384079  | -1.711506038 | 1.42E-09 | 6.28E-09 |
| AC099552.1 | 6.335638912  | -2.286201572 | 1.42E-09 | 6.29E-09 |
| FREM2      | -2.269467722 | 2.021567593  | 1.43E-09 | 6.32E-09 |
| DLGAP1-AS2 | 1.147795511  | 0.178206611  | 1.44E-09 | 6.36E-09 |
| FGF12      | 1.978255495  | 1.943775098  | 1.44E-09 | 6.36E-09 |
| PSORS1C1   | 2.01156909   | -0.565424925 | 1.44E-09 | 6.38E-09 |

|            |              |              |          |          |
|------------|--------------|--------------|----------|----------|
| KCNK12     | 3.467538246  | -2.312635326 | 1.45E-09 | 6.40E-09 |
| TFDP3      | 7.539571614  | -0.084098812 | 1.45E-09 | 6.42E-09 |
| AC004870.2 | 5.940406189  | -2.390441407 | 1.46E-09 | 6.46E-09 |
| LINC02188  | 3.646768974  | -0.855365304 | 1.46E-09 | 6.46E-09 |
| AC125603.2 | 2.9681761    | -1.721634383 | 1.48E-09 | 6.54E-09 |
| KCNQ1OT1   | 1.218421789  | 1.119241416  | 1.48E-09 | 6.54E-09 |
| PRSS1      | 9.207754146  | 2.480969806  | 1.48E-09 | 6.54E-09 |
| LINC01315  | 1.376581941  | -0.453180153 | 1.49E-09 | 6.58E-09 |
| PLCD4      | 1.054227707  | 1.054153339  | 1.50E-09 | 6.61E-09 |
| C10orf91   | 4.623087121  | -1.0773659   | 1.51E-09 | 6.64E-09 |
| LINC02027  | -2.117402134 | 0.702751997  | 1.51E-09 | 6.64E-09 |
| SP3P       | 4.527492238  | -2.434151298 | 1.51E-09 | 6.67E-09 |
| AL031719.2 | 1.237795448  | -2.569615336 | 1.52E-09 | 6.68E-09 |
| AP001271.2 | 1.539997758  | -2.681463644 | 1.52E-09 | 6.69E-09 |
| KNOP1P5    | 5.585772132  | -2.483083322 | 1.54E-09 | 6.76E-09 |
| KRTAP5-10  | 1.921337699  | -2.438327479 | 1.55E-09 | 6.80E-09 |
| TEX37      | 5.814971482  | -2.71989302  | 1.56E-09 | 6.85E-09 |
| LINC02593  | -1.638450391 | -0.56691651  | 1.58E-09 | 6.93E-09 |
| FDCSP      | 5.383004848  | 2.178661007  | 1.58E-09 | 6.93E-09 |
| AXDND1     | 2.023598532  | -2.191664457 | 1.58E-09 | 6.94E-09 |
| CACNB3     | 1.099319874  | 1.404759108  | 1.59E-09 | 6.98E-09 |
| AC008060.4 | 5.853029645  | -2.712450417 | 1.59E-09 | 6.98E-09 |
| ADH1C      | -1.553558894 | 9.097336931  | 1.59E-09 | 7.00E-09 |
| AL591845.1 | 1.227187769  | -0.621313004 | 1.61E-09 | 7.06E-09 |
| CACNA1I    | 3.316741378  | 0.368646526  | 1.61E-09 | 7.06E-09 |
| SAA1       | -2.046389719 | 10.49351767  | 1.63E-09 | 7.14E-09 |
| TACR1      | 3.281835995  | 0.048744492  | 1.64E-09 | 7.17E-09 |
| BX322650.1 | 1.684438005  | -2.670550148 | 1.64E-09 | 7.18E-09 |
| TMC5       | 2.948469966  | 3.095524292  | 1.65E-09 | 7.21E-09 |
| C1QTNF1    | -1.38955195  | 5.144282818  | 1.65E-09 | 7.21E-09 |
| FGL1       | -1.299685024 | 10.60159773  | 1.68E-09 | 7.36E-09 |
| LRRN2      | 1.819706858  | 1.778396489  | 1.69E-09 | 7.39E-09 |
| SPECC1     | 1.528838013  | 2.876112791  | 1.70E-09 | 7.46E-09 |
| CILP       | -1.411232955 | 0.447079089  | 1.72E-09 | 7.54E-09 |
| SCN4B      | 1.214940856  | 1.275032747  | 1.73E-09 | 7.58E-09 |
| GLUL       | 2.065540756  | 11.50595155  | 1.75E-09 | 7.67E-09 |
| TMSB10     | 1.351124405  | 8.813616087  | 1.75E-09 | 7.67E-09 |
| TYRO3      | 1.672022958  | 3.116335904  | 1.76E-09 | 7.71E-09 |
| AC021092.1 | 1.944219977  | -2.850260185 | 1.77E-09 | 7.72E-09 |
| RAMP3      | -1.000777768 | 3.784819101  | 1.77E-09 | 7.75E-09 |
| MAGEB1     | 6.862708555  | -1.320782847 | 1.79E-09 | 7.80E-09 |
| AL161891.1 | 1.195194566  | -0.676070388 | 1.79E-09 | 7.80E-09 |
| RTL1       | 6.548773023  | -0.092570385 | 1.79E-09 | 7.80E-09 |
| MFSD2B     | 1.891605154  | -0.579103077 | 1.79E-09 | 7.82E-09 |
| TF         | -1.048708314 | 12.86134998  | 1.79E-09 | 7.82E-09 |
| SLC4A4     | -1.241242056 | 4.881145108  | 1.80E-09 | 7.83E-09 |
| ASB15      | 4.155099149  | -2.00821829  | 1.80E-09 | 7.84E-09 |
| AC104809.1 | -2.338241753 | 2.004899357  | 1.81E-09 | 7.87E-09 |
| CD24       | 2.03541093   | 6.788866088  | 1.81E-09 | 7.87E-09 |
| AC008549.1 | -1.622946852 | 3.188060404  | 1.81E-09 | 7.88E-09 |
| NMUR1      | -1.052635837 | -0.421017841 | 1.82E-09 | 7.93E-09 |
| RHOF       | 1.368387209  | 0.170527794  | 1.82E-09 | 7.93E-09 |
| AL080317.2 | 1.195318988  | -1.435624197 | 1.83E-09 | 7.95E-09 |
| GUCY2C     | 3.023937008  | 2.240772532  | 1.83E-09 | 7.98E-09 |
| PRSS56     | 6.179472275  | -0.497438655 | 1.84E-09 | 7.98E-09 |
| AL445647.1 | 3.734249953  | -2.909322134 | 1.85E-09 | 8.05E-09 |
| AL139327.1 | 7.067844591  | -1.059425821 | 1.87E-09 | 8.11E-09 |
| SEMA3G     | 1.118793675  | 3.204506706  | 1.87E-09 | 8.13E-09 |

|            |              |              |          |          |
|------------|--------------|--------------|----------|----------|
| CYP2C18    | -1.216207665 | 5.671777547  | 1.87E-09 | 8.14E-09 |
| ZNF382     | 1.309575477  | 0.561209062  | 1.93E-09 | 8.39E-09 |
| CFAP74     | -1.449571386 | -0.746491455 | 1.95E-09 | 8.44E-09 |
| AGPAT4     | 1.342567834  | 1.984681907  | 1.97E-09 | 8.53E-09 |
| AP002761.4 | 1.429634303  | 1.104202893  | 1.97E-09 | 8.54E-09 |
| C1QB       | -1.072225502 | 6.907501721  | 1.97E-09 | 8.55E-09 |
| AC068580.1 | 1.363071855  | -2.212992739 | 2.00E-09 | 8.64E-09 |
| NMNAT2     | 2.338120658  | -0.317021564 | 2.00E-09 | 8.65E-09 |
| FAM71F2    | 1.341080789  | -0.493282943 | 2.00E-09 | 8.65E-09 |
| AIFM3      | 1.253265319  | 0.918590471  | 2.01E-09 | 8.71E-09 |
| AKR1B10P1  | 3.357039144  | 0.886429835  | 2.02E-09 | 8.71E-09 |
| AC016717.2 | 5.953389493  | -0.844660001 | 2.02E-09 | 8.72E-09 |
| AC010327.4 | 1.17249608   | -1.086994355 | 2.02E-09 | 8.72E-09 |
| LINC02413  | 5.085188731  | -1.564168006 | 2.04E-09 | 8.82E-09 |
| COL1A1     | 1.77198197   | 8.524523778  | 2.05E-09 | 8.86E-09 |
| HOXA9      | 2.543928414  | -2.492910328 | 2.05E-09 | 8.86E-09 |
| PKDCC      | 1.264075714  | 4.093791015  | 2.06E-09 | 8.88E-09 |
| B3GNT4     | 1.372921047  | -1.314381862 | 2.07E-09 | 8.94E-09 |
| AC005324.3 | 2.81254314   | -2.846329424 | 2.07E-09 | 8.94E-09 |
| CD248      | 1.102416174  | 3.522866541  | 2.08E-09 | 8.95E-09 |
| OAS2       | -1.156818338 | 5.220370801  | 2.08E-09 | 8.96E-09 |
| SQSTM1     | 1.068539653  | 9.338063854  | 2.08E-09 | 8.97E-09 |
| LUZP4      | 6.348082386  | -2.273789548 | 2.09E-09 | 8.99E-09 |
| FAM110C    | -1.211532115 | 3.972823785  | 2.11E-09 | 9.09E-09 |
| ALOX15B    | 3.237052068  | 2.121118775  | 2.11E-09 | 9.09E-09 |
| AC131009.1 | 1.303507337  | -2.240180251 | 2.12E-09 | 9.12E-09 |
| CES5A      | -1.446988693 | 1.309740564  | 2.12E-09 | 9.13E-09 |
| BCYRN1     | 2.080351574  | -0.682620368 | 2.13E-09 | 9.15E-09 |
| AC005165.1 | 3.692991591  | -0.90771468  | 2.14E-09 | 9.21E-09 |
| NR1I2      | -1.365608857 | 5.144873041  | 2.15E-09 | 9.24E-09 |
| MTNR1B     | 6.880912358  | -0.855848999 | 2.15E-09 | 9.24E-09 |
| TLL2       | 1.971150474  | -1.321121561 | 2.15E-09 | 9.25E-09 |
| AL139246.3 | 1.432302537  | -2.116822634 | 2.15E-09 | 9.26E-09 |
| TUBB1      | -1.047896352 | -2.241104252 | 2.16E-09 | 9.29E-09 |
| HIST1H1C   | 1.438255078  | 7.055680976  | 2.16E-09 | 9.29E-09 |
| AL355472.1 | 1.061617751  | 0.815417837  | 2.17E-09 | 9.31E-09 |
| ANXA2P2    | 1.039067694  | 0.972460077  | 2.22E-09 | 9.55E-09 |
| NKPD1      | 2.311380098  | -2.653229351 | 2.23E-09 | 9.56E-09 |
| MECOM      | 1.163938617  | 2.487624375  | 2.25E-09 | 9.67E-09 |
| SCGB1D2    | 5.485235344  | -1.239996224 | 2.28E-09 | 9.76E-09 |
| AC011815.1 | 1.201751804  | -0.868228005 | 2.29E-09 | 9.81E-09 |
| LINC01956  | 4.730235623  | -1.888929565 | 2.32E-09 | 9.93E-09 |
| AC104534.1 | 2.041062486  | -1.239906461 | 2.33E-09 | 9.98E-09 |
| AC008060.1 | 5.298862695  | -2.793442987 | 2.34E-09 | 1.00E-08 |
| ADAM22     | 1.695742345  | 0.475658275  | 2.37E-09 | 1.01E-08 |
| AL162582.1 | 3.506141529  | -0.253765233 | 2.38E-09 | 1.02E-08 |
| AL365203.2 | 1.006098534  | 1.922424178  | 2.41E-09 | 1.03E-08 |
| TMEM191C   | 1.31440621   | -1.953170839 | 2.42E-09 | 1.03E-08 |
| FOXD4      | 1.624097458  | -2.234567418 | 2.43E-09 | 1.04E-08 |
| AC084125.4 | 1.257583696  | -2.098437913 | 2.45E-09 | 1.05E-08 |
| HS6ST2     | 3.871991862  | 1.233482496  | 2.47E-09 | 1.05E-08 |
| HIST3H2BB  | 3.049909734  | -1.988443391 | 2.47E-09 | 1.06E-08 |
| LINC02600  | 2.577046386  | -0.858621419 | 2.49E-09 | 1.06E-08 |
| DNAH8      | 2.155892916  | -1.865050579 | 2.53E-09 | 1.08E-08 |
| LINC00114  | 2.905912747  | -2.83410861  | 2.54E-09 | 1.09E-08 |
| MIR325HG   | 2.777292274  | -1.254619834 | 2.55E-09 | 1.09E-08 |
| ZNF724     | 1.425627978  | -1.38371054  | 2.59E-09 | 1.10E-08 |
| SLC6A14    | 5.223091268  | -0.504636637 | 2.62E-09 | 1.12E-08 |

|            |              |              |          |          |
|------------|--------------|--------------|----------|----------|
| MYRF       | 1.08113422   | 5.708843615  | 2.63E-09 | 1.12E-08 |
| CAMKV      | 4.690787872  | -2.267691568 | 2.63E-09 | 1.12E-08 |
| AC022306.3 | 1.297200169  | -2.487546667 | 2.65E-09 | 1.13E-08 |
| PCSK1N     | 4.062735802  | 2.131671619  | 2.65E-09 | 1.13E-08 |
| AC093616.1 | 1.18500281   | -1.830933308 | 2.66E-09 | 1.13E-08 |
| PRR7       | 1.213414462  | 1.320866207  | 2.67E-09 | 1.14E-08 |
| PRRX2      | 2.853738306  | -1.786296943 | 2.67E-09 | 1.14E-08 |
| AC124067.2 | 2.151807561  | -2.8752425   | 2.69E-09 | 1.14E-08 |
| RTN2       | 1.275680408  | 2.925504851  | 2.69E-09 | 1.14E-08 |
| LINC00702  | 1.301258958  | -0.811375184 | 2.72E-09 | 1.15E-08 |
| AC115619.1 | -1.047734317 | 5.610675184  | 2.72E-09 | 1.15E-08 |
| AP000350.5 | 1.450153105  | -2.902445943 | 2.73E-09 | 1.16E-08 |
| CPT1B      | 1.064901918  | 0.458116013  | 2.74E-09 | 1.16E-08 |
| LINC01637  | 1.348975783  | -1.0564317   | 2.74E-09 | 1.16E-08 |
| SYNGR4     | 2.090161418  | -1.767360617 | 2.75E-09 | 1.16E-08 |
| ST6GALNAC5 | 2.658094452  | -1.629018921 | 2.77E-09 | 1.17E-08 |
| CNNM1      | 2.636048065  | 2.471209555  | 2.80E-09 | 1.19E-08 |
| BMP4       | 1.759921593  | 3.393670681  | 2.81E-09 | 1.19E-08 |
| SCN11A     | -1.294402388 | -2.0544175   | 2.83E-09 | 1.20E-08 |
| GPR1       | 3.035066978  | -1.905126368 | 2.85E-09 | 1.21E-08 |
| GRM4       | 3.312889501  | -2.462325455 | 2.86E-09 | 1.21E-08 |
| B3GNT5     | 1.658889457  | 3.186698114  | 2.86E-09 | 1.21E-08 |
| AVPR2      | 1.631075818  | -1.848997574 | 2.91E-09 | 1.23E-08 |
| KIF7       | 1.224773608  | 1.496533504  | 2.97E-09 | 1.25E-08 |
| SAMSN1     | -1.030931392 | 1.698431852  | 2.98E-09 | 1.26E-08 |
| PACSIN1    | 2.158564163  | 1.161915533  | 2.98E-09 | 1.26E-08 |
| CACNB1     | 1.047518152  | 0.214666884  | 2.99E-09 | 1.26E-08 |
| AC010247.2 | 2.688294346  | 0.224878426  | 2.99E-09 | 1.26E-08 |
| LINC01151  | 2.243178014  | 0.562508194  | 3.01E-09 | 1.27E-08 |
| AL592295.1 | 1.182291267  | -2.855178191 | 3.03E-09 | 1.28E-08 |
| FOXJ1      | 3.218421661  | 1.361883945  | 3.04E-09 | 1.28E-08 |
| EN1        | 4.919728227  | -2.386166579 | 3.07E-09 | 1.30E-08 |
| HOXC13     | 4.84481666   | -2.533730047 | 3.08E-09 | 1.30E-08 |
| GLS        | 1.066992779  | 5.008820639  | 3.09E-09 | 1.30E-08 |
| AL008721.2 | 1.214742445  | -1.169431957 | 3.13E-09 | 1.32E-08 |
| KITLG      | 1.140092587  | 2.71775747   | 3.14E-09 | 1.32E-08 |
| AC068620.2 | 1.206131993  | -2.84118797  | 3.14E-09 | 1.32E-08 |
| CNR1       | 2.625450886  | -0.070321398 | 3.15E-09 | 1.33E-08 |
| AL442128.2 | 1.35567281   | -2.872846297 | 3.17E-09 | 1.33E-08 |
| AC136632.2 | 1.155931474  | -1.155432152 | 3.18E-09 | 1.34E-08 |
| CEBPA-DT   | 1.083093208  | 3.206965472  | 3.18E-09 | 1.34E-08 |
| ZNF492     | 2.779536638  | -2.086849112 | 3.18E-09 | 1.34E-08 |
| STK19B     | 1.778443597  | -0.347359111 | 3.21E-09 | 1.35E-08 |
| PCP4       | 5.770015319  | 0.681921834  | 3.21E-09 | 1.35E-08 |
| AC090772.3 | 1.646058647  | -1.557607549 | 3.25E-09 | 1.36E-08 |
| VNN1       | -1.460805503 | 7.167710824  | 3.25E-09 | 1.37E-08 |
| FIGNL2     | 1.557660537  | -0.693512946 | 3.26E-09 | 1.37E-08 |
| CHRNA5     | 1.712171802  | -1.306686979 | 3.29E-09 | 1.38E-08 |
| TPM3P9     | 1.084818714  | 1.917751276  | 3.29E-09 | 1.38E-08 |
| AP001767.3 | 1.49634337   | -2.656617517 | 3.32E-09 | 1.39E-08 |
| AC108752.1 | 5.962372958  | -2.178767932 | 3.33E-09 | 1.39E-08 |
| IGHM       | -1.683586066 | 6.039887451  | 3.34E-09 | 1.40E-08 |
| CCDC13     | 2.604433564  | 1.261371369  | 3.34E-09 | 1.40E-08 |
| NAT16      | 2.856936761  | -1.663731871 | 3.34E-09 | 1.40E-08 |
| KCNMB3     | 1.198083909  | 0.215318346  | 3.45E-09 | 1.44E-08 |
| ZNF730     | 2.761241139  | -2.629543113 | 3.46E-09 | 1.45E-08 |
| MMP9       | 2.038249123  | 3.97239733   | 3.46E-09 | 1.45E-08 |
| S100A3     | 1.939864379  | -1.002209706 | 3.46E-09 | 1.45E-08 |

|             |              |              |          |          |
|-------------|--------------|--------------|----------|----------|
| AC010643.1  | 2.251843853  | 0.466713066  | 3.46E-09 | 1.45E-08 |
| CCDC114     | 1.521482542  | -1.633065174 | 3.47E-09 | 1.45E-08 |
| CABP7       | 1.33411055   | -1.483923157 | 3.48E-09 | 1.45E-08 |
| MTND2P28    | -1.063563954 | 7.71135554   | 3.50E-09 | 1.46E-08 |
| MGAT3       | 1.55182002   | 0.220917519  | 3.51E-09 | 1.46E-08 |
| KCNJ14      | 1.015662825  | -0.150192369 | 3.52E-09 | 1.47E-08 |
| DBIL5P      | 1.122258224  | -2.566146205 | 3.53E-09 | 1.47E-08 |
| HCG20       | 2.017709057  | -2.299970222 | 3.54E-09 | 1.47E-08 |
| HGFAC       | -1.772397531 | 6.657629571  | 3.56E-09 | 1.48E-08 |
| TMEM151A    | 2.465771111  | 0.960362625  | 3.59E-09 | 1.50E-08 |
| AP002847.1  | 2.113597344  | -2.29214343  | 3.60E-09 | 1.50E-08 |
| LINC02037   | -1.38965216  | 1.016947592  | 3.61E-09 | 1.50E-08 |
| AC079760.2  | 3.089771528  | -2.718981724 | 3.64E-09 | 1.51E-08 |
| AC090921.1  | 4.653294541  | -1.437329138 | 3.64E-09 | 1.51E-08 |
| RNF2P1      | 1.319846729  | -2.115964202 | 3.77E-09 | 1.56E-08 |
| YEATS2-AS1  | 1.088596059  | -1.935113507 | 3.80E-09 | 1.58E-08 |
| AC024580.1  | 1.397979003  | -1.878118527 | 3.80E-09 | 1.58E-08 |
| CLRN1-AS1   | -1.933625798 | -2.428518764 | 3.81E-09 | 1.58E-08 |
| IKBKE       | 1.185279407  | 2.573690096  | 3.81E-09 | 1.58E-08 |
| AC011481.3  | 1.185608587  | 1.824349527  | 3.81E-09 | 1.58E-08 |
| RPL34-AS1   | -1.032411379 | -2.793326032 | 3.82E-09 | 1.58E-08 |
| PWWP2B      | 1.022435613  | 3.702310845  | 3.84E-09 | 1.59E-08 |
| MAGEB16     | 5.670828367  | -2.829191585 | 3.85E-09 | 1.60E-08 |
| AC099792.1  | 3.167567791  | -2.949218279 | 3.86E-09 | 1.60E-08 |
| AL591848.3  | 1.009158974  | -1.812555933 | 3.86E-09 | 1.60E-08 |
| CRLF2       | 3.423482052  | -0.934659447 | 3.87E-09 | 1.60E-08 |
| TM6SF2      | -1.147623592 | 4.02700819   | 3.91E-09 | 1.62E-08 |
| AL662907.1  | 1.113530719  | -2.604531545 | 3.95E-09 | 1.63E-08 |
| PAX8        | 1.271659575  | 1.746109392  | 3.96E-09 | 1.64E-08 |
| CAVIN3      | 1.20901087   | 2.929283724  | 4.00E-09 | 1.65E-08 |
| AC010970.1  | -2.604976022 | 0.609502105  | 4.06E-09 | 1.68E-08 |
| ELFN1-AS1   | 3.639004857  | -0.318263784 | 4.10E-09 | 1.69E-08 |
| EN2         | 3.755351482  | -1.772446729 | 4.11E-09 | 1.70E-08 |
| PLAU        | 1.241750585  | 3.099569291  | 4.14E-09 | 1.71E-08 |
| CD274       | -1.027478029 | 1.087031844  | 4.16E-09 | 1.72E-08 |
| C2CD4D      | 1.346340358  | -1.763600317 | 4.17E-09 | 1.72E-08 |
| TBX2-AS1    | 1.523629306  | -0.2949728   | 4.18E-09 | 1.72E-08 |
| AC006128.1  | 1.121757428  | 0.464201686  | 4.18E-09 | 1.72E-08 |
| AC127496.1  | 1.423207564  | -2.87813967  | 4.19E-09 | 1.72E-08 |
| SLC4A3      | 2.609483084  | 1.207761409  | 4.25E-09 | 1.75E-08 |
| SLC12A9-AS1 | 1.680527145  | -2.280220329 | 4.36E-09 | 1.79E-08 |
| AC137630.3  | 1.49590181   | -2.659061399 | 4.38E-09 | 1.80E-08 |
| AC090409.1  | 1.432742924  | -2.576066646 | 4.39E-09 | 1.81E-08 |
| ICAM5       | 2.49593893   | -0.98718147  | 4.40E-09 | 1.81E-08 |
| AC116914.2  | 1.12160287   | -2.719047686 | 4.40E-09 | 1.81E-08 |
| MNX1        | 4.648729864  | -0.704922975 | 4.43E-09 | 1.82E-08 |
| HNRNPA1P10  | 1.113566943  | -2.009866169 | 4.48E-09 | 1.84E-08 |
| BIK         | 1.885148194  | 0.606610835  | 4.49E-09 | 1.84E-08 |
| DKKL1       | 1.936830941  | -1.80501007  | 4.52E-09 | 1.85E-08 |
| LGALS14     | 10.45457109  | 1.849885212  | 4.57E-09 | 1.87E-08 |
| GNMT        | -1.500274097 | 6.556841868  | 4.62E-09 | 1.89E-08 |
| IGSF1       | 2.335810172  | 2.91825741   | 4.62E-09 | 1.89E-08 |
| MGC27382    | -1.108179489 | -0.525404882 | 4.66E-09 | 1.91E-08 |
| SRC         | 1.150663713  | 4.78556603   | 4.68E-09 | 1.92E-08 |
| CACYBPP2    | 1.195295895  | -2.799210995 | 4.72E-09 | 1.93E-08 |
| SLC12A5     | 1.631497088  | 0.257831495  | 4.74E-09 | 1.94E-08 |
| REG3G       | 11.31311002  | 2.719137914  | 4.78E-09 | 1.96E-08 |
| PITX2       | 4.803973206  | -1.018780325 | 4.81E-09 | 1.97E-08 |



|            |              |              |          |          |
|------------|--------------|--------------|----------|----------|
| AC007406.2 | 2.359255787  | -0.810236281 | 4.82E-09 | 1.97E-08 |
| GAGE2A     | 6.57114926   | -1.849052825 | 4.85E-09 | 1.98E-08 |
| SSC4D      | 1.515092786  | 2.525616634  | 4.86E-09 | 1.99E-08 |
| AC121338.2 | 1.627901201  | -1.019146865 | 4.86E-09 | 1.99E-08 |
| CKMT1A     | 3.420011207  | -1.483336682 | 4.90E-09 | 2.00E-08 |
| GP2        | 5.648062257  | 3.179653311  | 4.93E-09 | 2.01E-08 |
| SPATA21    | 2.462646555  | 0.8979491    | 4.96E-09 | 2.03E-08 |
| SLC26A9    | 3.693380903  | 0.576132911  | 4.98E-09 | 2.03E-08 |
| SOCS2-AS1  | -1.118759065 | 0.921339167  | 5.01E-09 | 2.04E-08 |
| SPHK1      | 2.093228068  | 4.119193334  | 5.01E-09 | 2.04E-08 |
| AC010536.1 | 1.155151919  | -1.87199743  | 5.02E-09 | 2.05E-08 |
| F13A1      | 1.773058586  | 3.236542164  | 5.04E-09 | 2.05E-08 |
| SCAMP5     | 1.349613635  | 3.990042863  | 5.05E-09 | 2.06E-08 |
| TH         | -1.989784416 | -2.320730961 | 5.08E-09 | 2.07E-08 |
| CNFN       | 1.962405926  | -0.180919316 | 5.12E-09 | 2.09E-08 |
| LINC01697  | 4.84231582   | -1.111145382 | 5.14E-09 | 2.09E-08 |
| AL163952.1 | 3.079939561  | -2.421640132 | 5.16E-09 | 2.10E-08 |
| CYTL1      | 1.556494296  | -1.943658675 | 5.23E-09 | 2.13E-08 |
| IGF1       | -1.314130497 | 3.190695035  | 5.26E-09 | 2.14E-08 |
| MTTP       | -1.07264149  | 7.421680281  | 5.28E-09 | 2.14E-08 |
| BEX2       | 2.574052783  | 2.717744574  | 5.28E-09 | 2.14E-08 |
| AC113410.3 | 1.735719255  | -2.773174024 | 5.32E-09 | 2.16E-08 |
| CKMT1B     | 4.506839848  | -0.297165089 | 5.32E-09 | 2.16E-08 |
| HABP2      | -1.122663291 | 8.486746243  | 5.38E-09 | 2.18E-08 |
| AC026356.2 | 1.355613048  | -2.748523781 | 5.38E-09 | 2.18E-08 |
| DLL3       | 3.937980279  | -2.614235133 | 5.41E-09 | 2.19E-08 |
| AL139289.2 | 1.197595236  | -1.575300119 | 5.44E-09 | 2.20E-08 |
| CCDC112    | 1.031228773  | 1.140367043  | 5.45E-09 | 2.21E-08 |
| WSCD1      | 1.404375297  | 1.974615118  | 5.49E-09 | 2.23E-08 |
| EFHD1      | -1.312854333 | 4.447161874  | 5.52E-09 | 2.23E-08 |
| MEOX2      | 1.57204517   | 0.105058325  | 5.53E-09 | 2.24E-08 |
| GUCY2D     | 2.094410589  | -0.371014843 | 5.54E-09 | 2.24E-08 |
| NPM2       | 1.932360735  | 1.884134998  | 5.56E-09 | 2.25E-08 |
| PCNX2      | 1.437852946  | 1.830210419  | 5.69E-09 | 2.30E-08 |
| AC138965.3 | 3.914364452  | -2.261924404 | 5.70E-09 | 2.30E-08 |
| TRPM5      | 2.901099515  | -2.605383539 | 5.76E-09 | 2.33E-08 |
| TCL6       | 2.797709697  | -1.433645616 | 5.80E-09 | 2.34E-08 |
| GLB1L3     | 3.291488091  | -1.350682474 | 5.80E-09 | 2.34E-08 |
| APOC3      | -1.193116436 | 12.00975613  | 5.87E-09 | 2.37E-08 |
| C3orf85    | -1.736719868 | 1.018444745  | 5.91E-09 | 2.38E-08 |
| LINC01876  | 1.925754231  | -1.734805813 | 6.01E-09 | 2.42E-08 |
| RPRML      | 3.05854736   | -2.224237064 | 6.03E-09 | 2.43E-08 |
| CNGA1      | -1.268137555 | 3.717187396  | 6.06E-09 | 2.44E-08 |
| PYY2       | 1.343477734  | -1.83144983  | 6.18E-09 | 2.49E-08 |
| AIRE       | 2.881817017  | -2.83450235  | 6.19E-09 | 2.49E-08 |
| CCDC185    | 3.759085975  | -2.886184791 | 6.20E-09 | 2.49E-08 |
| VSX1       | 2.188422171  | -1.619008649 | 6.28E-09 | 2.52E-08 |
| KRT86      | 2.256421171  | 0.216373959  | 6.28E-09 | 2.53E-08 |
| PSORS1C3   | 1.903368471  | -1.064223234 | 6.30E-09 | 2.53E-08 |
| C1QTNF12   | 1.654538089  | -0.098125509 | 6.31E-09 | 2.53E-08 |
| CASC15     | 1.850791976  | 0.005550004  | 6.38E-09 | 2.56E-08 |
| CCDC162P   | 2.436579229  | 1.168168034  | 6.52E-09 | 2.62E-08 |
| LRP8       | 1.558098532  | 0.581004089  | 6.60E-09 | 2.65E-08 |
| TMSB15A    | 2.159463801  | -2.20670216  | 6.61E-09 | 2.65E-08 |
| SHLD2P1    | -1.089403469 | -0.877298963 | 6.63E-09 | 2.66E-08 |
| ART4       | -1.113063613 | 4.375998893  | 6.69E-09 | 2.68E-08 |
| LINC01694  | 2.857612708  | -0.867130108 | 6.70E-09 | 2.68E-08 |
| STPG3      | 1.541329554  | 0.089697799  | 6.77E-09 | 2.71E-08 |

|            |              |              |          |          |
|------------|--------------|--------------|----------|----------|
| SH3GL3     | 6.094322351  | 0.5520251    | 6.82E-09 | 2.73E-08 |
| TMEM155    | 3.073849299  | -2.173151652 | 6.93E-09 | 2.77E-08 |
| SLC25A25   | -1.001932445 | 6.437609206  | 6.95E-09 | 2.78E-08 |
| ELOVL3     | 2.402665702  | -1.698258144 | 6.98E-09 | 2.79E-08 |
| Z97192.2   | 2.479978159  | -1.318238411 | 6.99E-09 | 2.79E-08 |
| ZNF320     | 1.456486964  | 2.714407743  | 7.01E-09 | 2.80E-08 |
| AQP5       | 2.593417033  | -1.736510781 | 7.02E-09 | 2.80E-08 |
| ONECUT3    | 3.516516474  | -2.158182073 | 7.05E-09 | 2.81E-08 |
| AC090502.4 | 4.569791952  | -2.944595639 | 7.06E-09 | 2.82E-08 |
| AC068580.4 | 1.407484752  | -1.147775558 | 7.13E-09 | 2.84E-08 |
| ENOX1      | 1.829444869  | -0.216917936 | 7.14E-09 | 2.85E-08 |
| AL109933.2 | -1.848467689 | -2.538539244 | 7.21E-09 | 2.87E-08 |
| STOX1      | 1.846440296  | 0.308360978  | 7.27E-09 | 2.90E-08 |
| AC006946.2 | 3.356714189  | -2.896876382 | 7.28E-09 | 2.90E-08 |
| SOHLH1     | 5.504072932  | -1.483307988 | 7.29E-09 | 2.90E-08 |
| LINC01792  | 4.095215802  | -3.116401606 | 7.30E-09 | 2.91E-08 |
| MPPED1     | -1.46024931  | 3.479413459  | 7.35E-09 | 2.93E-08 |
| AC145423.2 | 1.611261707  | -2.904632803 | 7.36E-09 | 2.93E-08 |
| 14-Sep     | 5.813125056  | -1.26052144  | 7.36E-09 | 2.93E-08 |
| SLCO1B3    | -2.028117306 | 4.700116549  | 7.42E-09 | 2.95E-08 |
| CHST1      | 1.335152351  | 1.867581316  | 7.51E-09 | 2.98E-08 |
| AC007998.3 | 1.384776573  | -2.299448469 | 7.52E-09 | 2.99E-08 |
| TM4SF1-AS1 | 1.553883097  | -1.882985605 | 7.52E-09 | 2.99E-08 |
| ZNF560     | 5.260091412  | -1.990932015 | 7.52E-09 | 2.99E-08 |
| ITGB4      | 1.466795472  | 4.092300414  | 7.54E-09 | 2.99E-08 |
| NOL4       | -2.026083192 | -1.03567146  | 7.59E-09 | 3.01E-08 |
| MICAL1     | 1.02831097   | 3.716142926  | 7.60E-09 | 3.01E-08 |
| DMRTB1     | 6.287373919  | -2.338124022 | 7.74E-09 | 3.07E-08 |
| SACS-AS1   | 6.57165795   | -1.346547143 | 7.78E-09 | 3.08E-08 |
| HIST1H2AE  | 1.564366763  | 1.121544124  | 7.80E-09 | 3.09E-08 |
| RUNDC3A    | 1.834106094  | -1.105386523 | 7.87E-09 | 3.11E-08 |
| PPBP       | -1.898227686 | -1.984632275 | 7.88E-09 | 3.12E-08 |
| MROH3P     | 3.622369771  | -2.197823916 | 7.90E-09 | 3.13E-08 |
| CLDN19     | 2.878956381  | 0.084933893  | 7.95E-09 | 3.15E-08 |
| AP000892.3 | -1.033836093 | 0.203406751  | 7.97E-09 | 3.15E-08 |
| ENPP6      | 2.894973409  | 0.234632698  | 8.02E-09 | 3.17E-08 |
| AL450306.1 | 1.547073754  | -2.709297871 | 8.07E-09 | 3.19E-08 |
| LINC02109  | 3.847313175  | -2.269356202 | 8.09E-09 | 3.20E-08 |
| CLUL1      | 1.855752992  | -2.061877303 | 8.22E-09 | 3.25E-08 |
| CSAG1      | 4.478460013  | 1.932996867  | 8.27E-09 | 3.27E-08 |
| USP32P3    | 2.558863245  | -3.100946848 | 8.31E-09 | 3.28E-08 |
| CASP12     | 1.439655851  | -2.517866393 | 8.36E-09 | 3.30E-08 |
| MYO16      | -1.089904234 | 1.394728404  | 8.37E-09 | 3.30E-08 |
| OPRPN      | 4.104526267  | 2.22340632   | 8.58E-09 | 3.38E-08 |
| LINC02253  | 4.730976733  | -1.972870314 | 8.60E-09 | 3.39E-08 |
| KRTAP5-6   | 1.645600464  | -0.83914623  | 8.60E-09 | 3.39E-08 |
| TKTL1      | 3.915266624  | 1.223465939  | 8.67E-09 | 3.42E-08 |
| AL118505.1 | 2.486050494  | -2.189769513 | 8.69E-09 | 3.42E-08 |
| APOH       | -1.008963908 | 12.08008054  | 8.70E-09 | 3.43E-08 |
| MYH7B      | 2.131720896  | 2.469863147  | 8.80E-09 | 3.46E-08 |
| TMEM52B    | 3.178450647  | -0.826408399 | 8.80E-09 | 3.46E-08 |
| LINC-ROR   | 3.584694536  | -2.740395123 | 8.85E-09 | 3.48E-08 |
| PTH2R      | 3.63560668   | 2.269097553  | 8.92E-09 | 3.50E-08 |
| GRM2       | 1.661964244  | -1.235188967 | 9.01E-09 | 3.54E-08 |
| RAB3D      | 1.579388717  | 2.565522311  | 9.09E-09 | 3.57E-08 |
| AL451069.3 | 4.109156566  | -2.31696195  | 9.12E-09 | 3.58E-08 |
| AC012510.1 | 1.075124537  | -0.59454723  | 9.13E-09 | 3.58E-08 |
| TM4SF19    | 2.310292419  | -1.507567477 | 9.17E-09 | 3.59E-08 |

|             |              |              |          |          |
|-------------|--------------|--------------|----------|----------|
| SBK3        | 2.601805343  | -1.878070839 | 9.22E-09 | 3.61E-08 |
| P2RX3       | -1.303580737 | -0.894498304 | 9.23E-09 | 3.61E-08 |
| AC025575.2  | 3.237871415  | -2.152070001 | 9.25E-09 | 3.62E-08 |
| TMEM74B     | 1.369772153  | 1.954102974  | 9.27E-09 | 3.63E-08 |
| PRR34-AS1   | 1.262528793  | 1.752625873  | 9.30E-09 | 3.64E-08 |
| BHLHE40-AS1 | 1.760029649  | -0.12359588  | 9.33E-09 | 3.65E-08 |
| DNAH3       | 2.293787214  | -1.899590641 | 9.41E-09 | 3.68E-08 |
| ZNF43       | 1.316888812  | 1.809606999  | 9.42E-09 | 3.68E-08 |
| SEMA7A      | 1.33493821   | 3.130573781  | 9.46E-09 | 3.70E-08 |
| TMEM98      | 1.20924998   | 5.33002956   | 9.48E-09 | 3.71E-08 |
| RAPSN       | 1.338931551  | -1.345197401 | 9.51E-09 | 3.72E-08 |
| BPIFA1      | 8.162220964  | 0.092144327  | 9.51E-09 | 3.72E-08 |
| ZSCAN12P1   | 1.02633505   | -0.52597027  | 9.57E-09 | 3.74E-08 |
| TMIE        | 1.698301014  | 0.831709632  | 9.57E-09 | 3.74E-08 |
| MTMR7       | 1.830909728  | 1.978113337  | 9.58E-09 | 3.74E-08 |
| ACADL       | -1.420042111 | 3.541534009  | 9.59E-09 | 3.74E-08 |
| SPTA1       | 3.452798804  | 0.113335531  | 9.67E-09 | 3.77E-08 |
| CXorf67     | 5.560369417  | -1.811979189 | 9.69E-09 | 3.78E-08 |
| CES3        | -1.134976995 | 5.232907131  | 9.74E-09 | 3.80E-08 |
| CA5B        | 1.324771489  | 2.020689568  | 9.77E-09 | 3.81E-08 |
| DGKK        | 4.033753743  | -1.189588589 | 9.80E-09 | 3.82E-08 |
| TMEM25      | -1.065980133 | 2.97662423   | 9.81E-09 | 3.82E-08 |
| PIGZ        | 1.011335796  | 2.240107524  | 9.86E-09 | 3.84E-08 |
| CHP2        | 6.210734743  | 0.247017452  | 9.90E-09 | 3.86E-08 |
| CAMK2B      | -1.624999326 | 2.220466936  | 9.93E-09 | 3.86E-08 |
| PGF         | 1.148924337  | 2.915969369  | 1.00E-08 | 3.90E-08 |
| TMPRSS5     | 1.349805838  | -1.251755986 | 1.01E-08 | 3.94E-08 |
| AC092506.1  | 2.562429479  | -2.600380588 | 1.01E-08 | 3.94E-08 |
| PTPRN       | 2.333675773  | -2.801545222 | 1.02E-08 | 3.98E-08 |
| HDGFL1      | 6.754272915  | -1.195378305 | 1.03E-08 | 4.01E-08 |
| TPH1        | 1.803199744  | -1.602746469 | 1.03E-08 | 4.01E-08 |
| MEF2B       | 1.048388997  | -1.723124968 | 1.05E-08 | 4.06E-08 |
| DISP2       | 1.547169627  | 1.232020569  | 1.05E-08 | 4.06E-08 |
| NAMPTP1     | -1.221477561 | 2.471659608  | 1.05E-08 | 4.06E-08 |
| CCDC13-AS1  | 2.197821384  | -1.205037473 | 1.06E-08 | 4.11E-08 |
| FAM166A     | 1.736825455  | -1.710928104 | 1.06E-08 | 4.12E-08 |
| KIAA0319    | 2.046584634  | -0.819149586 | 1.08E-08 | 4.17E-08 |
| AL139042.1  | 4.832976131  | -3.177862052 | 1.08E-08 | 4.19E-08 |
| MPIG6B      | -1.235126897 | -2.865766578 | 1.08E-08 | 4.20E-08 |
| ANGPT2      | 1.058657744  | 2.693496616  | 1.08E-08 | 4.20E-08 |
| ERP27       | 2.288690174  | 0.937952293  | 1.09E-08 | 4.21E-08 |
| AL590483.3  | 3.206785041  | -2.401046739 | 1.09E-08 | 4.21E-08 |
| TAC3        | 2.928097931  | -1.89812307  | 1.10E-08 | 4.25E-08 |
| IGFN1       | 4.679655839  | 2.440864448  | 1.10E-08 | 4.26E-08 |
| HAPLN3      | 1.373545277  | 1.520824368  | 1.11E-08 | 4.28E-08 |
| CLEC9A      | -1.240648621 | -1.561944618 | 1.11E-08 | 4.30E-08 |
| HOXB7       | 1.636517379  | 0.474968835  | 1.12E-08 | 4.33E-08 |
| AC008109.1  | 3.044204566  | -0.862513106 | 1.13E-08 | 4.36E-08 |
| GDAP1L1     | 3.061514886  | -2.411767276 | 1.14E-08 | 4.39E-08 |
| AC005154.2  | 1.044845834  | -1.662794523 | 1.14E-08 | 4.39E-08 |
| ALX1        | 5.720965812  | -2.595552945 | 1.14E-08 | 4.40E-08 |
| INSC        | 1.857819609  | -0.982926148 | 1.14E-08 | 4.40E-08 |
| TPRXL       | 3.120310403  | -1.780018233 | 1.14E-08 | 4.41E-08 |
| DDIT4L      | 2.348665071  | 0.169094752  | 1.15E-08 | 4.42E-08 |
| LINC02267   | 4.965967435  | -2.750182358 | 1.15E-08 | 4.42E-08 |
| SSX3        | 6.688866412  | -1.003100862 | 1.15E-08 | 4.44E-08 |
| RNU6ATAC    | 4.631455224  | -0.927708794 | 1.16E-08 | 4.47E-08 |
| AC090826.1  | 1.829578546  | -2.64408432  | 1.16E-08 | 4.47E-08 |

|            |              |              |          |          |
|------------|--------------|--------------|----------|----------|
| MUC15      | 4.907639438  | 0.111946511  | 1.17E-08 | 4.49E-08 |
| LHX3       | 3.734841676  | -0.215913929 | 1.19E-08 | 4.56E-08 |
| CHRNB4     | 1.767581819  | -1.86870522  | 1.20E-08 | 4.60E-08 |
| SMARCD3    | 1.311839629  | 2.852548151  | 1.21E-08 | 4.65E-08 |
| RTL5       | -1.093243379 | 2.351745785  | 1.21E-08 | 4.66E-08 |
| FAM99B     | -1.675077164 | 1.240478214  | 1.21E-08 | 4.67E-08 |
| DUOX2      | 3.810142869  | 4.772374455  | 1.22E-08 | 4.68E-08 |
| AC244107.1 | 5.707734805  | -2.289007767 | 1.22E-08 | 4.68E-08 |
| OBSCN      | 1.991184997  | 3.206377217  | 1.22E-08 | 4.69E-08 |
| FLRT1      | 1.371995489  | -1.423773559 | 1.22E-08 | 4.69E-08 |
| VN1R1      | 1.303127304  | -0.803491112 | 1.22E-08 | 4.69E-08 |
| TSPAN8     | 1.820618006  | 6.33266369   | 1.23E-08 | 4.72E-08 |
| AL161772.1 | 2.298467543  | -2.168470361 | 1.23E-08 | 4.73E-08 |
| MMP1       | 2.542265649  | 1.313752104  | 1.23E-08 | 4.73E-08 |
| LINC02577  | 4.486085289  | -2.92733474  | 1.24E-08 | 4.76E-08 |
| GLI1       | 1.348428696  | 0.096876379  | 1.25E-08 | 4.77E-08 |
| PTPRG-AS1  | 1.703865539  | -1.973553131 | 1.25E-08 | 4.79E-08 |
| SYT9       | -2.318198944 | 1.011825326  | 1.25E-08 | 4.79E-08 |
| AC097478.1 | 3.588926223  | -1.069972313 | 1.25E-08 | 4.80E-08 |
| CBSL       | -1.748363723 | 1.172061572  | 1.26E-08 | 4.82E-08 |
| CAPG       | 1.33002842   | 4.765581931  | 1.26E-08 | 4.83E-08 |
| FOXC2      | 1.718112098  | -0.719328303 | 1.26E-08 | 4.83E-08 |
| AC016405.3 | 1.524839269  | -0.429920667 | 1.27E-08 | 4.85E-08 |
| RAET1K     | 1.776958902  | -2.976823524 | 1.28E-08 | 4.91E-08 |
| SIK1B      | -1.130733438 | 4.033023873  | 1.29E-08 | 4.94E-08 |
| PCDHB8     | 2.48081626   | -0.914832495 | 1.31E-08 | 5.01E-08 |
| AC074135.1 | 3.195679587  | -2.950717342 | 1.33E-08 | 5.06E-08 |
| TREX2      | 1.720176227  | -0.95112878  | 1.34E-08 | 5.09E-08 |
| AC099489.1 | 1.325785127  | 0.555649366  | 1.34E-08 | 5.09E-08 |
| HSPD1P6    | 1.245322252  | -2.913019878 | 1.35E-08 | 5.13E-08 |
| CPE        | 1.310689627  | 5.729752531  | 1.35E-08 | 5.13E-08 |
| HES4       | 1.184983645  | 1.676890158  | 1.35E-08 | 5.13E-08 |
| YWHAEP1    | 3.128679596  | -2.781997514 | 1.35E-08 | 5.16E-08 |
| DAGLA      | 1.423960514  | 2.086072886  | 1.36E-08 | 5.17E-08 |
| AIF1L      | 1.390025382  | 3.211648195  | 1.37E-08 | 5.21E-08 |
| AC062015.1 | 6.242199835  | -2.191033658 | 1.38E-08 | 5.25E-08 |
| AL954650.1 | 5.572096122  | -2.62527672  | 1.41E-08 | 5.34E-08 |
| AC010969.1 | -1.879886064 | -1.200116276 | 1.41E-08 | 5.36E-08 |
| C1QTNF7    | -1.245041764 | -0.430665732 | 1.42E-08 | 5.38E-08 |
| AACSP1     | 4.885683069  | -1.929375395 | 1.42E-08 | 5.39E-08 |
| RND1       | -1.023770752 | 5.876811413  | 1.42E-08 | 5.39E-08 |
| SLC25A15P3 | 3.50984436   | -1.832989687 | 1.43E-08 | 5.41E-08 |
| SSPO       | 1.443229559  | 1.311949248  | 1.43E-08 | 5.42E-08 |
| AP000866.2 | 1.125782295  | -2.035160779 | 1.45E-08 | 5.47E-08 |
| GOLM1      | 1.253513347  | 6.321487066  | 1.45E-08 | 5.49E-08 |
| AC022413.1 | 1.04114889   | -1.342490982 | 1.46E-08 | 5.51E-08 |
| GPAT2      | 1.598088279  | 1.029230451  | 1.48E-08 | 5.60E-08 |
| TMEM61     | 2.33208589   | -1.39984705  | 1.48E-08 | 5.60E-08 |
| MROH6      | 1.313916677  | 3.248003065  | 1.49E-08 | 5.63E-08 |
| CPLX1      | 1.502187995  | 3.22830819   | 1.53E-08 | 5.77E-08 |
| NR0B2      | -1.0840511   | 6.048397364  | 1.53E-08 | 5.78E-08 |
| PTPRR      | 1.949356963  | -1.471834087 | 1.54E-08 | 5.79E-08 |
| ZNF826P    | 1.798212664  | 0.699233123  | 1.54E-08 | 5.81E-08 |
| ACSM2A     | -1.183342818 | 7.756581106  | 1.54E-08 | 5.81E-08 |
| AC025580.3 | 1.472870262  | -2.518378532 | 1.55E-08 | 5.82E-08 |
| ANKS6      | 1.363257015  | 3.365706478  | 1.56E-08 | 5.86E-08 |
| CTSK       | 1.9699724    | 4.25931303   | 1.58E-08 | 5.95E-08 |
| CAHM       | 1.099160455  | -1.356160788 | 1.58E-08 | 5.96E-08 |

|            |              |              |          |          |
|------------|--------------|--------------|----------|----------|
| PDCD1LG2   | -1.102108966 | 0.50756067   | 1.62E-08 | 6.10E-08 |
| NOS2       | 1.488130623  | 0.607634304  | 1.63E-08 | 6.15E-08 |
| CKMT2      | 2.61547024   | 2.397125589  | 1.65E-08 | 6.20E-08 |
| AL117335.1 | 1.536869795  | -1.443864061 | 1.66E-08 | 6.22E-08 |
| WFDC1      | -1.097740826 | 0.890014345  | 1.67E-08 | 6.26E-08 |
| ZNF208     | 2.114012448  | -1.182137898 | 1.67E-08 | 6.26E-08 |
| SLC22A31   | 4.100487838  | 3.90432786   | 1.67E-08 | 6.28E-08 |
| COL9A2     | 1.741680541  | 1.871095737  | 1.68E-08 | 6.29E-08 |
| DGAT2L7P   | 1.610525646  | -2.343548669 | 1.71E-08 | 6.40E-08 |
| EXPH5      | -1.388035893 | 2.761072815  | 1.71E-08 | 6.41E-08 |
| OVAAL      | 4.792423859  | -2.630769121 | 1.73E-08 | 6.48E-08 |
| SLC6A12    | -1.139408672 | 5.749171254  | 1.74E-08 | 6.52E-08 |
| HKDC1      | 1.627921217  | 5.103218737  | 1.77E-08 | 6.60E-08 |
| MRAS       | 1.06603903   | 3.804616161  | 1.77E-08 | 6.63E-08 |
| AL031722.1 | -1.049086538 | -1.97794441  | 1.78E-08 | 6.66E-08 |
| AL513534.1 | 1.136478014  | -0.147729597 | 1.79E-08 | 6.67E-08 |
| FAM171B    | 1.182045928  | 0.626102132  | 1.79E-08 | 6.68E-08 |
| SLC10A1    | -1.514905361 | 7.367009548  | 1.80E-08 | 6.73E-08 |
| MFAP4      | -1.526139008 | 4.18357073   | 1.80E-08 | 6.73E-08 |
| CACNA1C    | 1.196233018  | 1.462682029  | 1.82E-08 | 6.80E-08 |
| TMEM108    | 1.529883689  | -1.003064498 | 1.83E-08 | 6.84E-08 |
| SERHL      | 1.123157861  | -1.686595619 | 1.84E-08 | 6.86E-08 |
| PABPC3     | 1.135945486  | -1.563909913 | 1.84E-08 | 6.88E-08 |
| AC004253.1 | 1.172582048  | -2.431316229 | 1.85E-08 | 6.91E-08 |
| AC010624.2 | 4.406755942  | -2.598748796 | 1.86E-08 | 6.93E-08 |
| HNF4A-AS1  | -1.281735454 | 2.639943582  | 1.87E-08 | 6.96E-08 |
| PAGE2      | 6.894095922  | 1.999512913  | 1.88E-08 | 7.01E-08 |
| HOXC4      | 2.044920453  | -1.273177667 | 1.89E-08 | 7.03E-08 |
| MIR217HG   | 3.683817886  | -1.991632673 | 1.90E-08 | 7.08E-08 |
| PLCH2      | 2.166887047  | 3.304468484  | 1.90E-08 | 7.08E-08 |
| ERVMER34-1 | 3.026850286  | 0.151270408  | 1.91E-08 | 7.09E-08 |
| TTLL6      | 1.985305936  | -1.412273329 | 1.93E-08 | 7.19E-08 |
| AC073575.2 | 1.003633871  | -2.587127937 | 1.95E-08 | 7.24E-08 |
| RPL39L     | 1.694387679  | 2.50201919   | 1.96E-08 | 7.29E-08 |
| RIMS2      | 2.971748104  | -1.001595059 | 1.98E-08 | 7.33E-08 |
| SCUBE3     | 1.429452665  | -0.846034856 | 1.98E-08 | 7.36E-08 |
| WDR72      | -1.323395047 | 4.676105249  | 1.98E-08 | 7.36E-08 |
| AC004801.2 | 1.306791768  | -2.187652345 | 1.99E-08 | 7.37E-08 |
| RIMS3      | 1.121985124  | 0.763697874  | 1.99E-08 | 7.38E-08 |
| DUTP6      | 1.033591764  | -1.520540126 | 2.00E-08 | 7.43E-08 |
| ZNF781     | 1.568094334  | -0.37941117  | 2.01E-08 | 7.43E-08 |
| ZNF676     | 2.828515093  | -0.666189346 | 2.01E-08 | 7.43E-08 |
| SCGN       | 2.157305694  | 3.594697889  | 2.01E-08 | 7.44E-08 |
| AL133467.2 | 3.799339283  | -3.114291217 | 2.01E-08 | 7.46E-08 |
| EXOSC4     | 1.010517774  | 5.184188522  | 2.03E-08 | 7.52E-08 |
| AL354760.1 | 1.20822855   | -2.694576599 | 2.05E-08 | 7.59E-08 |
| PHYHD1     | -1.24560862  | 4.44656046   | 2.06E-08 | 7.62E-08 |
| ZNF703     | 1.337439199  | 3.85028669   | 2.07E-08 | 7.65E-08 |
| KLK2       | 5.405001868  | -0.602042786 | 2.07E-08 | 7.65E-08 |
| IMPG2      | 1.093619776  | -2.154195194 | 2.07E-08 | 7.65E-08 |
| ZNF83      | 1.408036715  | 3.543565985  | 2.11E-08 | 7.80E-08 |
| ZNF648     | 2.250453815  | 0.402685297  | 2.12E-08 | 7.83E-08 |
| APCS       | -1.171206484 | 9.777209671  | 2.12E-08 | 7.84E-08 |
| AC104958.2 | 1.130400012  | 3.618845555  | 2.12E-08 | 7.85E-08 |
| SOHLH2     | 5.12342042   | -0.951047743 | 2.14E-08 | 7.89E-08 |
| TRMT112P4  | 1.520001361  | -1.364155085 | 2.17E-08 | 8.00E-08 |
| GOLGA6L10  | 1.128543857  | -1.993053711 | 2.18E-08 | 8.03E-08 |
| DPYSL5     | 4.204017942  | -2.889659527 | 2.18E-08 | 8.05E-08 |

|            |              |              |          |          |
|------------|--------------|--------------|----------|----------|
| RASD1      | -1.244499074 | 5.688017767  | 2.19E-08 | 8.06E-08 |
| FXYD3      | 2.871183437  | 2.839046412  | 2.19E-08 | 8.06E-08 |
| RNY3P8     | 2.120843601  | -2.669343017 | 2.19E-08 | 8.09E-08 |
| AC007663.3 | 1.303130618  | -2.477071661 | 2.20E-08 | 8.09E-08 |
| FNDC10     | 1.706976259  | 1.474312446  | 2.25E-08 | 8.27E-08 |
| LINC00488  | 3.506536241  | -1.48486124  | 2.25E-08 | 8.29E-08 |
| STUM       | 1.688830113  | 0.029271606  | 2.25E-08 | 8.29E-08 |
| TNP1       | 8.815368546  | 0.784160242  | 2.26E-08 | 8.30E-08 |
| CLCN1      | 2.101534084  | -1.620219566 | 2.26E-08 | 8.32E-08 |
| AC068580.3 | 1.000625374  | 0.783257414  | 2.29E-08 | 8.41E-08 |
| SPINK1     | 2.881691696  | 8.230534637  | 2.30E-08 | 8.45E-08 |
| CDK3       | 1.036631637  | -0.902702022 | 2.31E-08 | 8.50E-08 |
| AC022893.1 | 1.111047908  | -1.319990644 | 2.31E-08 | 8.50E-08 |
| BNIP3P17   | 2.628177975  | -3.081620353 | 2.32E-08 | 8.52E-08 |
| NXPH3      | 1.515207036  | -0.095888193 | 2.33E-08 | 8.55E-08 |
| AC006480.2 | 1.046959975  | -2.069378111 | 2.33E-08 | 8.56E-08 |
| CACNA2D3   | 2.091084933  | -0.104203891 | 2.35E-08 | 8.62E-08 |
| AC104667.1 | 1.748235241  | -2.802987341 | 2.36E-08 | 8.66E-08 |
| PRG4       | -1.34140807  | 7.321295968  | 2.37E-08 | 8.68E-08 |
| DUOXA2     | 3.906857514  | 2.379440637  | 2.37E-08 | 8.69E-08 |
| AC083809.1 | 4.167844423  | 0.237247423  | 2.39E-08 | 8.76E-08 |
| FOXL1      | 1.669361525  | -0.458911784 | 2.41E-08 | 8.81E-08 |
| LINC01139  | 3.731612535  | -0.054862412 | 2.43E-08 | 8.88E-08 |
| GTSE1-DT   | 1.118898888  | -2.417974925 | 2.45E-08 | 8.98E-08 |
| ZNF32-AS2  | 1.124293959  | -2.048458252 | 2.45E-08 | 8.98E-08 |
| AL355803.1 | 1.481169176  | -2.784443159 | 2.46E-08 | 8.99E-08 |
| MRPS30-DT  | 1.097737168  | -1.652803998 | 2.46E-08 | 8.99E-08 |
| AXIN2      | 2.093509793  | 3.349072839  | 2.46E-08 | 8.99E-08 |
| TNFRSF19   | 2.21991299   | 3.285608027  | 2.47E-08 | 9.02E-08 |
| LINC02119  | 5.423636034  | -0.943629973 | 2.48E-08 | 9.07E-08 |
| HIST1H2BH  | 2.487153434  | -2.828439246 | 2.50E-08 | 9.13E-08 |
| AC140059.1 | 5.463826313  | -2.953702645 | 2.50E-08 | 9.15E-08 |
| CRYBA2     | 4.847215479  | -1.506487559 | 2.51E-08 | 9.17E-08 |
| AHRR       | 2.04939676   | 0.628757281  | 2.54E-08 | 9.26E-08 |
| ACTBP8     | 3.087868118  | -1.431912194 | 2.54E-08 | 9.29E-08 |
| RGS17      | 1.438286371  | -1.22458247  | 2.55E-08 | 9.29E-08 |
| ZNF556     | 2.50318302   | -1.931738389 | 2.56E-08 | 9.35E-08 |
| ARHGAP4    | 1.044023814  | 4.693812543  | 2.58E-08 | 9.40E-08 |
| RHOXF2B    | 5.907658263  | -2.610443747 | 2.58E-08 | 9.41E-08 |
| LRGUK      | 1.309160198  | -1.662348122 | 2.59E-08 | 9.43E-08 |
| LINC01132  | 1.112155232  | -0.885811558 | 2.59E-08 | 9.44E-08 |
| CACNA1E    | 3.06499731   | -0.379056862 | 2.60E-08 | 9.48E-08 |
| SIGLEC8    | -1.238863572 | -0.407824423 | 2.60E-08 | 9.48E-08 |
| AC136601.2 | -1.649176103 | -0.091040353 | 2.61E-08 | 9.50E-08 |
| ISM2       | 4.697276592  | -2.029757386 | 2.63E-08 | 9.56E-08 |
| CCDC155    | 2.876855443  | -1.640214089 | 2.67E-08 | 9.73E-08 |
| CLIP2      | 1.218768248  | 4.098644114  | 2.72E-08 | 9.88E-08 |
| PRR20G     | 5.036590366  | -3.229525634 | 2.72E-08 | 9.91E-08 |
| TRPV4      | -1.291505112 | 2.906831631  | 2.75E-08 | 9.99E-08 |
| CPA5       | 2.355235245  | -2.26503678  | 2.76E-08 | 1.00E-07 |
| AC244197.3 | 1.275921011  | -1.171897551 | 2.76E-08 | 1.00E-07 |
| AC092490.1 | 3.125659756  | 0.464953769  | 2.76E-08 | 1.00E-07 |
| LIX1       | 5.209325988  | -1.925305263 | 2.79E-08 | 1.01E-07 |
| TNNT2      | 2.151266413  | -0.699013827 | 2.79E-08 | 1.01E-07 |
| AL645608.8 | 2.0775109    | -2.096949426 | 2.80E-08 | 1.01E-07 |
| SCIN       | 1.865991244  | -0.309009599 | 2.82E-08 | 1.02E-07 |
| BSN        | 1.317117323  | 1.94825329   | 2.84E-08 | 1.03E-07 |
| SLC6A15    | 6.218141224  | -0.706936224 | 2.84E-08 | 1.03E-07 |

|            |              |              |          |          |
|------------|--------------|--------------|----------|----------|
| SOX21      | 4.019134683  | -2.42197226  | 2.85E-08 | 1.03E-07 |
| ANKLE1     | 1.40675945   | -1.176262147 | 2.86E-08 | 1.04E-07 |
| GJC3       | -1.08690732  | -0.405363984 | 2.86E-08 | 1.04E-07 |
| AK8        | 1.916656608  | -0.49402973  | 2.86E-08 | 1.04E-07 |
| ATF5       | -1.292998644 | 9.369037576  | 2.86E-08 | 1.04E-07 |
| ABCC8      | 2.586022754  | -0.803118102 | 2.91E-08 | 1.05E-07 |
| MEP1B      | -1.891962946 | -0.396018651 | 2.91E-08 | 1.05E-07 |
| SYT2       | 2.125795678  | -0.817490135 | 2.91E-08 | 1.05E-07 |
| OXCT1      | 1.76672223   | 2.306487053  | 2.92E-08 | 1.06E-07 |
| SLC13A4    | 1.06163275   | -0.639869615 | 2.94E-08 | 1.06E-07 |
| LINC02055  | 3.34936929   | -0.313302873 | 2.95E-08 | 1.07E-07 |
| AL391427.1 | 1.376805855  | -0.735824318 | 2.96E-08 | 1.07E-07 |
| FABP7      | 5.21462918   | -0.752313818 | 2.99E-08 | 1.08E-07 |
| AL353622.1 | 1.006970807  | 0.43939162   | 3.02E-08 | 1.09E-07 |
| LINC01605  | 3.06007841   | -2.77671342  | 3.03E-08 | 1.09E-07 |
| AL117339.4 | 1.279064628  | -2.593887137 | 3.03E-08 | 1.09E-07 |
| RPSAP18    | 1.129726698  | -1.556573637 | 3.04E-08 | 1.10E-07 |
| MAP1B      | 1.066219194  | 3.695446557  | 3.06E-08 | 1.10E-07 |
| ACOT12     | -1.174132624 | 5.266096908  | 3.06E-08 | 1.10E-07 |
| DRC7       | 1.241255368  | -0.231146715 | 3.07E-08 | 1.11E-07 |
| IFIT1      | -1.111314023 | 5.568589441  | 3.07E-08 | 1.11E-07 |
| AC009271.1 | 3.999613599  | -3.033285025 | 3.12E-08 | 1.12E-07 |
| GPR37L1    | 1.371417451  | -0.765916035 | 3.18E-08 | 1.14E-07 |
| LINC00879  | 5.668320459  | -2.228149002 | 3.19E-08 | 1.15E-07 |
| AL137230.1 | 1.376744132  | -1.719059155 | 3.19E-08 | 1.15E-07 |
| ENTPD3     | 2.72597063   | -1.401599162 | 3.20E-08 | 1.15E-07 |
| GNAT1      | 1.393677054  | -0.632403454 | 3.22E-08 | 1.16E-07 |
| AC011944.1 | 2.514683262  | -2.702874112 | 3.23E-08 | 1.16E-07 |
| SRPK3      | 1.437315952  | -0.84551677  | 3.23E-08 | 1.16E-07 |
| CT55       | 5.386134415  | -2.638299545 | 3.24E-08 | 1.16E-07 |
| VAC14-AS1  | 1.812959835  | 0.238616414  | 3.25E-08 | 1.17E-07 |
| TDRD5      | 3.834993274  | -1.521968356 | 3.28E-08 | 1.18E-07 |
| ATP8B3     | 1.100461268  | 1.206039853  | 3.28E-08 | 1.18E-07 |
| NDRG1      | 1.165610321  | 7.67943258   | 3.29E-08 | 1.18E-07 |
| ZBED2      | 2.357696914  | -1.533523158 | 3.30E-08 | 1.18E-07 |
| ANKRD45    | 1.78838716   | -1.608955903 | 3.36E-08 | 1.20E-07 |
| YWHAEP7    | 3.017703383  | -2.172188651 | 3.37E-08 | 1.21E-07 |
| SCGB1A1    | 5.760156092  | -1.795325636 | 3.42E-08 | 1.22E-07 |
| AL592166.1 | 1.113058512  | -2.681837541 | 3.43E-08 | 1.23E-07 |
| UNC5D      | 5.331473553  | -0.112315559 | 3.44E-08 | 1.23E-07 |
| SIRPB1     | -1.105934138 | -0.191357089 | 3.44E-08 | 1.23E-07 |
| LINC00689  | 3.429105137  | -1.127414086 | 3.48E-08 | 1.24E-07 |
| RSPH14     | 1.58589525   | -1.353269649 | 3.49E-08 | 1.25E-07 |
| ANO4       | 2.098148229  | -1.565901937 | 3.50E-08 | 1.25E-07 |
| AL590079.1 | -1.63390382  | -2.350564289 | 3.51E-08 | 1.25E-07 |
| CASC22     | 3.281168441  | -2.472239623 | 3.54E-08 | 1.26E-07 |
| AL445483.1 | 2.277625981  | -1.777969057 | 3.61E-08 | 1.29E-07 |
| LINC01511  | 4.65220285   | -3.021245728 | 3.61E-08 | 1.29E-07 |
| AC093724.1 | 1.270030593  | -1.730653233 | 3.63E-08 | 1.30E-07 |
| LGI2       | 1.427594898  | 0.519306233  | 3.64E-08 | 1.30E-07 |
| HPSE2      | 2.766973308  | -2.724639193 | 3.64E-08 | 1.30E-07 |
| ASLP1      | 1.314018166  | -2.432148316 | 3.65E-08 | 1.30E-07 |
| AC083880.1 | 1.070506928  | -1.516350916 | 3.67E-08 | 1.31E-07 |
| ZNF732     | 1.755798862  | -3.008607995 | 3.69E-08 | 1.31E-07 |
| AP006285.2 | -1.600419253 | -1.863963487 | 3.70E-08 | 1.32E-07 |
| MYCNOS     | 2.711989408  | -2.715743401 | 3.71E-08 | 1.32E-07 |
| LAMP5      | 2.892583187  | 0.873833043  | 3.72E-08 | 1.32E-07 |
| HIST1H3G   | 2.863500403  | -2.109957056 | 3.72E-08 | 1.32E-07 |

|              |              |              |          |          |
|--------------|--------------|--------------|----------|----------|
| AR           | -1.136223992 | 6.456333753  | 3.74E-08 | 1.33E-07 |
| PI4KAP1      | 1.089601149  | 1.148042032  | 3.75E-08 | 1.33E-07 |
| DCLK3        | 1.349520683  | -2.051292298 | 3.77E-08 | 1.34E-07 |
| VCAN         | 1.913775152  | 4.94505479   | 3.80E-08 | 1.35E-07 |
| AC015922.2   | -1.14625374  | -2.171236794 | 3.83E-08 | 1.36E-07 |
| AL583810.1   | 1.243499094  | -2.89846014  | 3.88E-08 | 1.37E-07 |
| BRDT         | 5.067620327  | -1.455731009 | 3.92E-08 | 1.39E-07 |
| MELTF        | 1.667545877  | 3.216020964  | 3.92E-08 | 1.39E-07 |
| NPNT         | 1.739645752  | 3.909029288  | 3.94E-08 | 1.39E-07 |
| CMPK2        | -1.029770131 | 2.929838488  | 3.97E-08 | 1.41E-07 |
| LINC00856    | 3.261725024  | -3.115788752 | 3.98E-08 | 1.41E-07 |
| LINC00885    | -1.78635196  | -0.079555753 | 3.98E-08 | 1.41E-07 |
| AC026368.1   | 1.971221348  | -2.805596631 | 4.00E-08 | 1.41E-07 |
| SLC30A2      | 3.023219199  | 1.718579772  | 4.01E-08 | 1.42E-07 |
| LGALS8-AS1   | 1.281510058  | -1.669852317 | 4.04E-08 | 1.43E-07 |
| C2orf40      | -1.309603807 | -1.379505693 | 4.04E-08 | 1.43E-07 |
| SERPINA3     | -1.131954418 | 4.450103642  | 4.05E-08 | 1.43E-07 |
| GAGE1        | 6.430783377  | -1.382282121 | 4.06E-08 | 1.43E-07 |
| IL13RA2      | -1.696297732 | 0.941909384  | 4.08E-08 | 1.44E-07 |
| DOC2GP       | 1.281089162  | -1.36588637  | 4.08E-08 | 1.44E-07 |
| PMPCAP1      | 3.570370518  | -3.018042882 | 4.09E-08 | 1.44E-07 |
| AC055822.1   | 1.0219785    | -1.739355941 | 4.10E-08 | 1.45E-07 |
| WIF1         | 5.293132893  | -0.692027729 | 4.14E-08 | 1.46E-07 |
| AC061975.6   | 5.242934986  | -1.420177706 | 4.17E-08 | 1.47E-07 |
| LIN28A       | 5.088922476  | -2.09839768  | 4.19E-08 | 1.48E-07 |
| SLC22A15     | 1.712046771  | 1.653185385  | 4.20E-08 | 1.48E-07 |
| AC138150.2   | 1.262761464  | -1.406700026 | 4.21E-08 | 1.48E-07 |
| FMO3         | -1.130971516 | 8.515884182  | 4.23E-08 | 1.49E-07 |
| ATP5F1AP3    | -1.014563067 | -2.056418761 | 4.32E-08 | 1.52E-07 |
| OTOP3        | 5.330583759  | -2.082314882 | 4.32E-08 | 1.52E-07 |
| AC112206.2   | -1.58120607  | 2.323311689  | 4.37E-08 | 1.53E-07 |
| PDK4         | -1.199525801 | 7.407543227  | 4.37E-08 | 1.54E-07 |
| MYOM3        | 1.425472683  | -1.367965009 | 4.39E-08 | 1.54E-07 |
| COMP         | 2.827770046  | 1.370195557  | 4.42E-08 | 1.55E-07 |
| Z98257.1     | 1.597988324  | 0.867045516  | 4.45E-08 | 1.56E-07 |
| FAM86GP      | 1.354566495  | -2.703810446 | 4.45E-08 | 1.56E-07 |
| TSPY2        | 6.53133298   | -2.129870272 | 4.51E-08 | 1.58E-07 |
| AC091390.3   | 1.158697573  | -2.623478966 | 4.52E-08 | 1.58E-07 |
| EVPL         | 2.67695931   | 1.795996701  | 4.52E-08 | 1.59E-07 |
| KLHDC8A      | 2.294388306  | -0.975315942 | 4.54E-08 | 1.59E-07 |
| AC078925.4   | 5.410210807  | -0.91772312  | 4.55E-08 | 1.59E-07 |
| AC040970.1   | 1.871816961  | -1.189355691 | 4.57E-08 | 1.60E-07 |
| CR382285.1   | 3.160082934  | -2.548241631 | 4.62E-08 | 1.62E-07 |
| AC104986.2   | 1.031914991  | -0.269681191 | 4.64E-08 | 1.63E-07 |
| FAM83F       | -1.784153719 | 0.911527436  | 4.64E-08 | 1.63E-07 |
| JPH2         | 1.676595501  | -0.100037674 | 4.65E-08 | 1.63E-07 |
| STX16-NPEPL1 | 1.102991483  | -0.766604741 | 4.66E-08 | 1.63E-07 |
| MUCL1        | 5.969534252  | 1.020296022  | 4.66E-08 | 1.63E-07 |
| LINC02487    | 1.420457473  | -0.472396139 | 4.71E-08 | 1.65E-07 |
| HCG9         | 1.677421143  | -2.76732635  | 4.78E-08 | 1.67E-07 |
| PPP1R1B      | 3.532178163  | 1.300476869  | 4.80E-08 | 1.68E-07 |
| ADAMTS14     | 1.443995146  | 0.148618009  | 4.81E-08 | 1.68E-07 |
| MSANTD1      | 1.013772862  | -2.005658048 | 4.83E-08 | 1.69E-07 |
| ALX4         | 3.666543073  | -2.439086196 | 4.86E-08 | 1.70E-07 |
| IQANK1       | 1.484682603  | 0.568690271  | 4.87E-08 | 1.70E-07 |
| AL121672.1   | 1.492074662  | -2.954130175 | 4.88E-08 | 1.70E-07 |
| AL354707.3   | 1.285488064  | -2.180016569 | 4.88E-08 | 1.70E-07 |
| OASL         | -1.118528511 | 4.690351404  | 4.95E-08 | 1.73E-07 |



|              |              |              |          |          |
|--------------|--------------|--------------|----------|----------|
| AC010491.1   | 1.046621744  | -1.22776465  | 5.00E-08 | 1.74E-07 |
| TAGLN2P1     | 1.037799845  | -2.347565204 | 5.00E-08 | 1.74E-07 |
| AL355102.4   | 2.039023301  | 0.452803897  | 5.02E-08 | 1.75E-07 |
| CLPS         | 10.35911706  | 1.808262951  | 5.07E-08 | 1.76E-07 |
| SPAG6        | 2.694020632  | -2.795945645 | 5.11E-08 | 1.78E-07 |
| CT45A10      | 5.678760343  | -2.810423233 | 5.13E-08 | 1.78E-07 |
| CAGE1        | 2.62474707   | -2.610752182 | 5.15E-08 | 1.79E-07 |
| SLC4A10      | -1.290103178 | -1.973101    | 5.15E-08 | 1.79E-07 |
| RBP5         | -1.023816568 | 6.721930914  | 5.17E-08 | 1.80E-07 |
| NUPR1        | 1.038016742  | 7.957109383  | 5.18E-08 | 1.80E-07 |
| AL139349.1   | 1.212869315  | -2.153347404 | 5.22E-08 | 1.81E-07 |
| ANKRD20A19P  | 5.931397758  | -1.151338416 | 5.29E-08 | 1.84E-07 |
| CTB-178M22.2 | 1.755321777  | -2.903895182 | 5.31E-08 | 1.84E-07 |
| AP003119.1   | 1.653361275  | -1.08403343  | 5.32E-08 | 1.85E-07 |
| ATP6V1B1     | 1.9232031    | -0.849451556 | 5.35E-08 | 1.86E-07 |
| HSPB1P1      | 1.21597265   | 0.417506564  | 5.36E-08 | 1.86E-07 |
| TRARG1       | 5.730923495  | 0.99972928   | 5.38E-08 | 1.87E-07 |
| RPL7P1       | 1.074813985  | 0.31607487   | 5.50E-08 | 1.90E-07 |
| HSD17B1      | 1.008552796  | 1.009011317  | 5.55E-08 | 1.92E-07 |
| CDH12        | 5.488424308  | 0.743440929  | 5.58E-08 | 1.93E-07 |
| ZNF467       | 1.134830548  | 3.323935517  | 5.58E-08 | 1.93E-07 |
| AC005726.3   | 1.015876017  | -1.733656952 | 5.67E-08 | 1.96E-07 |
| LCNL1        | 3.23270458   | -0.58474238  | 5.69E-08 | 1.97E-07 |
| LINC02158    | 3.580512159  | 2.136926413  | 5.69E-08 | 1.97E-07 |
| AL445437.1   | 2.38854743   | -0.932855178 | 5.78E-08 | 2.00E-07 |
| AC018638.7   | 1.144353072  | -1.332752709 | 5.79E-08 | 2.00E-07 |
| AC105339.2   | 1.121964567  | -2.191240427 | 5.81E-08 | 2.01E-07 |
| LINC00501    | 2.89499106   | -3.054802556 | 5.82E-08 | 2.01E-07 |
| MRPL35P2     | -1.116665759 | -2.870577235 | 5.82E-08 | 2.01E-07 |
| RPL17P34     | 1.379977189  | -2.725468098 | 5.86E-08 | 2.02E-07 |
| LRR39        | 1.206592212  | -0.505603266 | 5.86E-08 | 2.02E-07 |
| LINC00880    | 2.045940642  | -1.333852912 | 5.88E-08 | 2.03E-07 |
| AC025265.1   | 1.202538344  | -0.878969184 | 5.97E-08 | 2.06E-07 |
| AC253576.2   | 1.312605473  | -2.881536829 | 5.97E-08 | 2.06E-07 |
| AC087741.2   | 1.211560402  | -2.132563177 | 6.02E-08 | 2.07E-07 |
| RASGEF1A     | 2.089619435  | 0.812574759  | 6.09E-08 | 2.10E-07 |
| SCGB2A1      | 2.911604288  | -1.485917465 | 6.10E-08 | 2.10E-07 |
| AL022393.1   | 1.707124286  | -2.664161599 | 6.11E-08 | 2.10E-07 |
| AP003559.1   | 1.955775664  | -2.68513194  | 6.12E-08 | 2.11E-07 |
| AL512598.1   | 1.723084829  | -2.464670421 | 6.14E-08 | 2.11E-07 |
| AC025048.4   | 1.205208484  | -2.356742264 | 6.19E-08 | 2.13E-07 |
| AC090515.2   | 1.001697718  | -2.214048428 | 6.20E-08 | 2.13E-07 |
| RHOXF2       | 5.701523543  | -2.331702802 | 6.21E-08 | 2.13E-07 |
| GPR150       | 1.860390939  | -1.303565695 | 6.21E-08 | 2.14E-07 |
| FAM19A4      | 4.895290129  | 0.115493019  | 6.23E-08 | 2.14E-07 |
| LINC00494    | 3.372475103  | -0.389182564 | 6.24E-08 | 2.14E-07 |
| WNT2B        | 1.320531799  | 0.547716894  | 6.31E-08 | 2.17E-07 |
| TSPAN15      | 1.23095384   | 3.891559978  | 6.31E-08 | 2.17E-07 |
| OCA2         | 3.115986322  | 1.267179732  | 6.42E-08 | 2.20E-07 |
| TFAP2A       | 1.998642301  | 0.806199895  | 6.45E-08 | 2.21E-07 |
| GPAT3        | -1.044352386 | 3.975626057  | 6.45E-08 | 2.21E-07 |
| MAST1        | 1.397263393  | 0.935728937  | 6.49E-08 | 2.22E-07 |
| KRBA1        | 1.067126968  | 1.940114774  | 6.53E-08 | 2.24E-07 |
| FAM227A      | 1.640740771  | -1.362585958 | 6.54E-08 | 2.24E-07 |
| CDH22        | 4.469315552  | 0.423651199  | 6.63E-08 | 2.27E-07 |
| GRP          | 3.811681615  | -3.089981712 | 6.70E-08 | 2.30E-07 |
| AL353150.1   | 1.586823447  | -1.076265272 | 6.75E-08 | 2.31E-07 |
| MMP24        | 1.550787765  | 1.748351363  | 6.85E-08 | 2.34E-07 |

|             |              |              |          |          |
|-------------|--------------|--------------|----------|----------|
| ACBD7       | 1.573559111  | -2.24526881  | 6.86E-08 | 2.35E-07 |
| RFX6        | 3.574857409  | -1.85919582  | 6.91E-08 | 2.36E-07 |
| SLC16A8     | 1.386718328  | -1.326640927 | 6.96E-08 | 2.38E-07 |
| SCN7A       | -1.589062265 | -0.248943332 | 6.96E-08 | 2.38E-07 |
| LINC01474   | 2.214311878  | 0.515627308  | 6.96E-08 | 2.38E-07 |
| CYP3A43     | -1.415374326 | 2.187077148  | 7.01E-08 | 2.39E-07 |
| AL645939.1  | 1.289766605  | -2.438817449 | 7.01E-08 | 2.39E-07 |
| PIP5KL1     | 1.407794768  | -1.620906764 | 7.03E-08 | 2.40E-07 |
| AC022809.1  | 1.659561345  | -2.685054706 | 7.03E-08 | 2.40E-07 |
| AC087752.4  | 1.028682928  | -2.569074369 | 7.06E-08 | 2.41E-07 |
| KCNH5       | 4.639783321  | -2.345849538 | 7.12E-08 | 2.43E-07 |
| MT-TY       | -1.04110742  | -1.057290978 | 7.16E-08 | 2.44E-07 |
| Z82246.1    | 2.256848158  | -0.807498755 | 7.18E-08 | 2.45E-07 |
| AC006329.2  | -1.311475067 | 0.493754989  | 7.19E-08 | 2.45E-07 |
| MEIS3P1     | -1.192789803 | -1.841597233 | 7.21E-08 | 2.46E-07 |
| HAND2       | -1.608524159 | 1.411177919  | 7.41E-08 | 2.52E-07 |
| GXYLT1P6    | -1.741340754 | -2.800634829 | 7.42E-08 | 2.53E-07 |
| AC138207.3  | 1.730314852  | -2.920285456 | 7.57E-08 | 2.57E-07 |
| MYH13       | 3.571327634  | -2.814472965 | 7.60E-08 | 2.58E-07 |
| SNORC       | 1.564857366  | 4.572700195  | 7.60E-08 | 2.58E-07 |
| AC023043.4  | 1.09576874   | -1.453767876 | 7.60E-08 | 2.58E-07 |
| HIST2H2AC   | 1.047139048  | -0.165133861 | 7.61E-08 | 2.59E-07 |
| PIK3C2G     | -1.215026582 | 3.253593021  | 7.62E-08 | 2.59E-07 |
| KLHL35      | 1.815346752  | -1.693070677 | 7.64E-08 | 2.59E-07 |
| MYO1H       | 1.639744867  | -2.891630259 | 7.65E-08 | 2.60E-07 |
| AC019257.1  | -1.676743836 | -2.177734718 | 7.67E-08 | 2.60E-07 |
| ROS1        | 2.67083978   | -0.980513374 | 7.67E-08 | 2.61E-07 |
| NRCAM       | 2.446125217  | 3.306813228  | 7.77E-08 | 2.64E-07 |
| NKX2-2      | 4.545042221  | -2.92894357  | 7.88E-08 | 2.68E-07 |
| JAKMIP3     | 1.669969617  | -1.007854407 | 7.94E-08 | 2.69E-07 |
| MRLN        | 4.225906788  | -3.066606148 | 7.94E-08 | 2.69E-07 |
| PAQR8       | 1.30940602   | 2.543779678  | 8.14E-08 | 2.76E-07 |
| DWORF       | 4.814046579  | -1.201774388 | 8.14E-08 | 2.76E-07 |
| ADRB1       | -1.365808189 | -0.71184178  | 8.15E-08 | 2.76E-07 |
| AC006305.1  | 3.136019243  | -1.719288765 | 8.20E-08 | 2.78E-07 |
| EGFEM1P     | 2.873360403  | -2.148246064 | 8.22E-08 | 2.78E-07 |
| CCDC80      | 1.769842233  | 4.700320053  | 8.26E-08 | 2.79E-07 |
| USP54       | 1.144725657  | 2.646658657  | 8.28E-08 | 2.80E-07 |
| SEMA3B      | 1.544824965  | 3.853551043  | 8.32E-08 | 2.81E-07 |
| AL035701.1  | 1.512832846  | -1.920071528 | 8.40E-08 | 2.84E-07 |
| USH1G       | 3.423059605  | -2.783767565 | 8.41E-08 | 2.84E-07 |
| PRAMEF8     | 3.667121038  | -2.482079172 | 8.41E-08 | 2.84E-07 |
| AL133338.1  | 1.060488162  | 0.470096606  | 8.49E-08 | 2.87E-07 |
| AC133919.2  | 1.739656958  | -1.329192825 | 8.52E-08 | 2.87E-07 |
| CCL13       | 1.854940268  | -1.227348589 | 8.53E-08 | 2.88E-07 |
| AC139887.4  | 1.382616251  | -2.854630876 | 8.55E-08 | 2.88E-07 |
| C1QTNF1-AS1 | 2.373584197  | -1.093732095 | 8.61E-08 | 2.90E-07 |
| HIST1H1E    | 1.368372091  | -1.866755408 | 8.61E-08 | 2.90E-07 |
| GIPR        | 1.906514642  | 0.188477521  | 8.66E-08 | 2.92E-07 |
| LINC01589   | 3.277630526  | -1.803323565 | 8.69E-08 | 2.93E-07 |
| LINC02200   | 4.814317748  | -1.229091914 | 8.70E-08 | 2.93E-07 |
| PTPN5       | 1.848411857  | -2.679001491 | 8.70E-08 | 2.93E-07 |
| GDAP1       | 1.007470715  | 2.202149768  | 8.72E-08 | 2.94E-07 |
| IL4I1       | 1.520350724  | 1.882866369  | 8.72E-08 | 2.94E-07 |
| HOXA-AS2    | 1.390056802  | 0.948106426  | 8.75E-08 | 2.95E-07 |
| TRIM6       | 1.296335961  | 0.925484978  | 8.78E-08 | 2.96E-07 |
| CYP8B1      | -1.511562112 | 8.571769246  | 8.80E-08 | 2.96E-07 |
| RNU4-1      | -1.566707514 | -2.420806503 | 8.81E-08 | 2.96E-07 |

|            |              |              |          |          |
|------------|--------------|--------------|----------|----------|
| CRISPLD2   | -1.087788629 | 4.151052921  | 8.83E-08 | 2.97E-07 |
| YBX2       | 1.968900113  | 2.219337205  | 8.89E-08 | 2.99E-07 |
| MS4A10     | 4.85800672   | -0.725600513 | 8.91E-08 | 3.00E-07 |
| AL078604.2 | 1.551809586  | -1.350612837 | 8.97E-08 | 3.01E-07 |
| TRNP1      | 1.729769141  | 4.175371932  | 8.97E-08 | 3.01E-07 |
| LINC02041  | 2.801999194  | -2.128623457 | 9.11E-08 | 3.06E-07 |
| DISP3      | 2.298225857  | -2.090015299 | 9.14E-08 | 3.07E-07 |
| NAT8B      | 1.750329898  | 1.596800009  | 9.20E-08 | 3.08E-07 |
| GTF3C2-AS1 | 1.149905801  | -2.878102362 | 9.22E-08 | 3.09E-07 |
| APOBEC2    | 1.570675344  | -2.540694402 | 9.25E-08 | 3.10E-07 |
| AC135584.1 | -1.8005462   | -1.326940833 | 9.26E-08 | 3.10E-07 |
| NKAIN4     | 2.902674813  | -2.416788327 | 9.27E-08 | 3.10E-07 |
| AC244197.2 | 1.517130749  | -2.414969276 | 9.34E-08 | 3.13E-07 |
| GRIN2A     | 2.793249896  | 0.184883911  | 9.41E-08 | 3.15E-07 |
| ZNF728     | 3.480059321  | -2.24251355  | 9.46E-08 | 3.17E-07 |
| AC084018.2 | 1.016735648  | -2.020613036 | 9.56E-08 | 3.20E-07 |
| BLK        | -1.351234465 | -0.703216263 | 9.57E-08 | 3.20E-07 |
| PHF2P2     | 5.200427658  | -2.50643588  | 9.72E-08 | 3.25E-07 |
| PRRT3-AS1  | 1.315100126  | -0.040532373 | 9.85E-08 | 3.29E-07 |
| AL356019.2 | 1.034992484  | -1.46017411  | 9.86E-08 | 3.29E-07 |
| TLE6       | 1.301864905  | 1.647514986  | 9.90E-08 | 3.30E-07 |
| HCAR1      | 2.009055631  | -1.956911779 | 1.00E-07 | 3.34E-07 |
| TTPA       | -1.052829474 | 5.794591549  | 1.00E-07 | 3.35E-07 |
| AC127070.1 | 1.317457897  | -2.665958939 | 1.00E-07 | 3.35E-07 |
| SI         | 6.569744398  | 0.259630339  | 1.01E-07 | 3.37E-07 |
| CTRB1      | 6.164642479  | -1.545340369 | 1.01E-07 | 3.37E-07 |
| TUBB4A     | 2.554904876  | 3.370156536  | 1.02E-07 | 3.41E-07 |
| BSN-DT     | 1.577310534  | -2.449702044 | 1.03E-07 | 3.43E-07 |
| AC015912.3 | 1.390944475  | -1.049006316 | 1.04E-07 | 3.47E-07 |
| AC109635.4 | 5.679366229  | -1.576718122 | 1.05E-07 | 3.50E-07 |
| AC003985.2 | 6.361068092  | -1.118220692 | 1.06E-07 | 3.53E-07 |
| AL022322.2 | 1.086460029  | -2.641962898 | 1.07E-07 | 3.56E-07 |
| RNU4-2     | -1.62963928  | -0.98675197  | 1.07E-07 | 3.56E-07 |
| AL035446.1 | 2.516207571  | -0.666885622 | 1.09E-07 | 3.60E-07 |
| RHBG       | 2.707228262  | 5.431057797  | 1.09E-07 | 3.61E-07 |
| NEFL       | 3.925967378  | -0.848636595 | 1.10E-07 | 3.65E-07 |
| IGFL2      | 2.907651432  | -3.033171961 | 1.10E-07 | 3.66E-07 |
| LINC01353  | 1.590137865  | -2.796662883 | 1.10E-07 | 3.66E-07 |
| FAM160A1   | -1.182320265 | -0.973155669 | 1.11E-07 | 3.67E-07 |
| CERNA1     | 1.641030547  | -0.701637813 | 1.11E-07 | 3.69E-07 |
| KCNG2      | 1.426475436  | -2.6417635   | 1.12E-07 | 3.71E-07 |
| CDH11      | 1.551281711  | 2.788626846  | 1.12E-07 | 3.71E-07 |
| FTHL17     | 5.521030828  | -2.888682642 | 1.12E-07 | 3.71E-07 |
| AC016708.1 | 1.647859187  | -2.803814314 | 1.12E-07 | 3.73E-07 |
| ZNF793-AS1 | 1.725773591  | -0.704055878 | 1.13E-07 | 3.73E-07 |
| SLC30A8    | 4.110682274  | -2.125348899 | 1.13E-07 | 3.74E-07 |
| ADGRE4P    | -1.08106507  | -1.789950581 | 1.13E-07 | 3.76E-07 |
| AANAT      | 1.548850172  | -2.972021284 | 1.15E-07 | 3.79E-07 |
| AL359265.3 | 1.092976954  | -2.5579691   | 1.15E-07 | 3.79E-07 |
| ACTL10     | 1.227899013  | -0.516670724 | 1.15E-07 | 3.82E-07 |
| CT45A1     | 6.011598426  | -2.550497513 | 1.17E-07 | 3.87E-07 |
| AC007743.1 | 1.419602713  | -2.396804019 | 1.17E-07 | 3.88E-07 |
| AL121758.1 | 1.246397436  | -2.759229436 | 1.18E-07 | 3.89E-07 |
| COL21A1    | 1.394786412  | 1.55302765   | 1.20E-07 | 3.95E-07 |
| OSR1       | 1.770389519  | 0.29412902   | 1.20E-07 | 3.96E-07 |
| CCDC192    | 1.469451757  | -2.475956167 | 1.20E-07 | 3.96E-07 |
| LINC01948  | 1.70242948   | -2.746060269 | 1.21E-07 | 3.98E-07 |
| SCARA5     | -1.760172543 | 0.708126864  | 1.21E-07 | 4.00E-07 |

|            |              |              |          |          |
|------------|--------------|--------------|----------|----------|
| TNNI3      | 3.465957091  | -1.150732405 | 1.23E-07 | 4.05E-07 |
| CASC9      | 3.329322655  | 1.505864502  | 1.23E-07 | 4.06E-07 |
| BCAM       | 1.002922827  | 7.365880012  | 1.23E-07 | 4.06E-07 |
| ZFR2       | 2.720611167  | -1.356173869 | 1.24E-07 | 4.07E-07 |
| SCUBE2     | 2.19161815   | 2.249315816  | 1.25E-07 | 4.11E-07 |
| FBXW11P1   | -1.092746263 | -1.320525241 | 1.25E-07 | 4.11E-07 |
| RARRES1    | 1.640265088  | 3.281372017  | 1.25E-07 | 4.12E-07 |
| AC012073.1 | 1.144366367  | -0.999242927 | 1.25E-07 | 4.12E-07 |
| AC005837.1 | 1.161645392  | -2.604580498 | 1.29E-07 | 4.22E-07 |
| AL513329.1 | 1.206588128  | -2.757894532 | 1.29E-07 | 4.22E-07 |
| NUGGC      | -1.159033974 | 4.07251176   | 1.29E-07 | 4.24E-07 |
| CASQ2      | 1.382655298  | 0.163543875  | 1.29E-07 | 4.24E-07 |
| CHST10     | 1.228032234  | 1.467023198  | 1.29E-07 | 4.24E-07 |
| PINCR      | 4.730374491  | -3.156985709 | 1.30E-07 | 4.25E-07 |
| ERVMER61-1 | 4.49492534   | -2.738184977 | 1.30E-07 | 4.27E-07 |
| FMO1       | 2.206486957  | 2.150450685  | 1.30E-07 | 4.27E-07 |
| LINC00535  | 1.64998194   | -0.01753414  | 1.31E-07 | 4.28E-07 |
| AL365361.1 | -1.095391801 | -0.338510003 | 1.31E-07 | 4.29E-07 |
| LINC01714  | -1.347078608 | -2.006664754 | 1.31E-07 | 4.29E-07 |
| LINC00839  | 1.727424686  | -0.790495147 | 1.32E-07 | 4.31E-07 |
| POLN       | 1.153247507  | 0.731213762  | 1.32E-07 | 4.31E-07 |
| CTRB2      | 5.61196492   | -0.899063878 | 1.33E-07 | 4.34E-07 |
| AP000894.4 | 1.037420159  | -0.844230922 | 1.34E-07 | 4.37E-07 |
| MAGEA10    | 5.409591249  | -1.527586113 | 1.35E-07 | 4.40E-07 |
| AC005911.1 | 1.061431949  | -2.48256322  | 1.35E-07 | 4.41E-07 |
| EIF5A2     | 1.383068887  | 2.55174068   | 1.35E-07 | 4.42E-07 |
| SYT8       | 3.215589573  | 2.478205794  | 1.36E-07 | 4.45E-07 |
| TRIM72     | 2.517945058  | -1.07909356  | 1.36E-07 | 4.45E-07 |
| ZNF300P1   | 1.971443167  | -0.098316149 | 1.37E-07 | 4.47E-07 |
| COL1A2     | 1.392148537  | 7.76222179   | 1.37E-07 | 4.47E-07 |
| NFE2L3     | 1.033970842  | 2.744838583  | 1.38E-07 | 4.51E-07 |
| ZNF257     | 1.647608557  | -0.443807204 | 1.39E-07 | 4.55E-07 |
| PA2G4P4    | 1.018638036  | -2.416257594 | 1.40E-07 | 4.56E-07 |
| DKK2       | 1.757293037  | -0.098195247 | 1.40E-07 | 4.57E-07 |
| ADAM32     | 1.962561142  | -2.051866735 | 1.40E-07 | 4.57E-07 |
| DNAJB13    | 1.870438684  | -2.560766568 | 1.41E-07 | 4.59E-07 |
| PRODH2     | -1.038622847 | 6.433638699  | 1.41E-07 | 4.60E-07 |
| AC023906.5 | 2.312016358  | -1.144635382 | 1.42E-07 | 4.62E-07 |
| LINC01164  | 4.557786611  | -2.475943745 | 1.43E-07 | 4.64E-07 |
| AL451074.6 | 2.598700809  | -2.567548412 | 1.43E-07 | 4.66E-07 |
| AC010336.2 | -1.161506335 | -1.166677472 | 1.43E-07 | 4.66E-07 |
| PAQR5      | 1.821872598  | 3.345755067  | 1.44E-07 | 4.66E-07 |
| AC011447.3 | 1.486024079  | -2.274795528 | 1.44E-07 | 4.67E-07 |
| KC877373.1 | 2.420914397  | -2.626814445 | 1.44E-07 | 4.68E-07 |
| LINC01681  | 3.14120233   | -1.719556116 | 1.44E-07 | 4.69E-07 |
| C1orf158   | 3.887643436  | -2.842300727 | 1.46E-07 | 4.73E-07 |
| CLIC5      | 1.392790334  | 1.549598928  | 1.46E-07 | 4.75E-07 |
| ZDBF2      | -1.161973234 | 1.33593294   | 1.47E-07 | 4.76E-07 |
| STAR       | 2.696875578  | -0.987421855 | 1.48E-07 | 4.79E-07 |
| INHBA      | -1.016231448 | 3.676639273  | 1.48E-07 | 4.81E-07 |
| ZNF723     | 4.378558291  | -2.466548451 | 1.48E-07 | 4.81E-07 |
| CDH10      | 5.280727857  | -1.332506248 | 1.53E-07 | 4.96E-07 |
| COL5A3     | 1.302393561  | 5.717488476  | 1.55E-07 | 5.01E-07 |
| SLC1A3     | 1.184187059  | 2.73882896   | 1.56E-07 | 5.04E-07 |
| TRIM74     | 1.710677128  | -2.196722737 | 1.56E-07 | 5.04E-07 |
| TTYH2      | 1.135295481  | 2.128872471  | 1.56E-07 | 5.05E-07 |
| AC005005.3 | 1.08673227   | -1.692032094 | 1.57E-07 | 5.09E-07 |
| RAB34      | 1.443117586  | 4.155867388  | 1.58E-07 | 5.10E-07 |

|            |              |              |          |          |
|------------|--------------|--------------|----------|----------|
| MSMB       | 2.584968513  | -0.935776768 | 1.58E-07 | 5.10E-07 |
| AP000695.2 | 1.604953207  | -2.272797954 | 1.58E-07 | 5.11E-07 |
| MPPED2     | 1.390783439  | 0.299582271  | 1.59E-07 | 5.14E-07 |
| FTLP12     | 1.521908538  | -2.534519352 | 1.60E-07 | 5.15E-07 |
| SLC44A5    | 2.335526755  | 2.055016318  | 1.60E-07 | 5.17E-07 |
| HNRNPA1P21 | 1.454994126  | -1.513428389 | 1.60E-07 | 5.18E-07 |
| ATP1A2     | 2.094127249  | 1.907738574  | 1.61E-07 | 5.20E-07 |
| PNMA6F     | 5.00266437   | -2.801390198 | 1.61E-07 | 5.20E-07 |
| SNPH       | 1.201108123  | 0.251636461  | 1.62E-07 | 5.22E-07 |
| AC010457.1 | 3.224872314  | -2.611639552 | 1.62E-07 | 5.23E-07 |
| MYLK2      | 1.570226462  | -2.376898419 | 1.62E-07 | 5.24E-07 |
| AC025165.4 | 1.03621124   | -2.886833362 | 1.63E-07 | 5.25E-07 |
| ADAMTS6    | 1.271518294  | -0.42530655  | 1.64E-07 | 5.27E-07 |
| FLT3       | -1.130459818 | -0.918850677 | 1.64E-07 | 5.29E-07 |
| HMGNS5     | -1.007660975 | 2.337403076  | 1.64E-07 | 5.30E-07 |
| SLC51B     | 1.811953038  | 3.020805686  | 1.65E-07 | 5.30E-07 |
| AC011487.1 | 1.924361021  | -2.515457149 | 1.65E-07 | 5.31E-07 |
| ADAMTS20   | 3.446480259  | -3.058758524 | 1.71E-07 | 5.48E-07 |
| CBLN1      | 1.556281699  | 1.143631742  | 1.72E-07 | 5.54E-07 |
| LINC01301  | 1.141621799  | -1.044999448 | 1.73E-07 | 5.54E-07 |
| IGFL2-AS1  | 3.78563807   | -2.753122357 | 1.73E-07 | 5.55E-07 |
| SLC5A1     | -1.955017324 | 1.323173074  | 1.74E-07 | 5.59E-07 |
| C1orf229   | 1.336407467  | -1.162669077 | 1.76E-07 | 5.66E-07 |
| TMEM119    | 1.659103662  | 1.96303547   | 1.78E-07 | 5.70E-07 |
| AC134682.1 | 1.622910852  | -2.083295668 | 1.78E-07 | 5.71E-07 |
| ZNF793     | 1.269780738  | 0.431241897  | 1.79E-07 | 5.73E-07 |
| LINC02362  | -1.217582755 | 3.037512941  | 1.79E-07 | 5.74E-07 |
| CLRN3      | -1.554706306 | 3.654187697  | 1.79E-07 | 5.75E-07 |
| LINC01448  | 4.074380659  | -2.773395354 | 1.79E-07 | 5.75E-07 |
| SULT1A2    | -1.027781076 | 4.10496754   | 1.80E-07 | 5.76E-07 |
| NKX1-2     | 4.973097603  | -1.450275145 | 1.80E-07 | 5.76E-07 |
| SCNN1G     | 4.689717837  | -1.235228265 | 1.80E-07 | 5.77E-07 |
| CNGB3      | 2.275247761  | -2.866191028 | 1.81E-07 | 5.80E-07 |
| AC025271.4 | 1.186352341  | -1.573374674 | 1.81E-07 | 5.80E-07 |
| HIST1H3C   | 1.526077014  | -2.778642074 | 1.82E-07 | 5.84E-07 |
| ABCA4      | 1.191177536  | 1.176434448  | 1.84E-07 | 5.88E-07 |
| LINC02587  | 3.175960574  | -2.21690894  | 1.87E-07 | 5.97E-07 |
| AC105446.1 | 2.802763415  | -1.920240341 | 1.87E-07 | 5.99E-07 |
| C10orf55   | 1.705666623  | -2.885938462 | 1.89E-07 | 6.04E-07 |
| LINC00887  | 2.106744692  | -1.153288785 | 1.89E-07 | 6.04E-07 |
| AC008622.2 | 1.556103493  | -2.671579487 | 1.93E-07 | 6.15E-07 |
| GABRA2     | 5.178894049  | 0.706874037  | 1.95E-07 | 6.21E-07 |
| LAIR2      | 1.939228467  | -1.490327386 | 1.95E-07 | 6.23E-07 |
| SSTR3      | 2.789765612  | -1.708420314 | 1.96E-07 | 6.26E-07 |
| SH2D5      | 1.977148224  | -1.880197226 | 1.96E-07 | 6.26E-07 |
| LINC00958  | 4.189677644  | -1.400226129 | 1.97E-07 | 6.27E-07 |
| LINC00239  | 2.184337625  | -1.274783363 | 1.97E-07 | 6.29E-07 |
| CAPN14     | 1.940584104  | -2.889895596 | 1.98E-07 | 6.31E-07 |
| DDN        | 2.07763204   | -2.610234128 | 1.98E-07 | 6.32E-07 |
| AL445673.1 | 1.917579889  | -2.691751634 | 2.03E-07 | 6.46E-07 |
| AC109460.2 | 1.146714067  | -1.827535824 | 2.04E-07 | 6.49E-07 |
| NELL1      | 6.445678168  | -0.471226766 | 2.04E-07 | 6.51E-07 |
| AL513318.2 | 3.52555657   | -1.62265841  | 2.04E-07 | 6.51E-07 |
| PERM1      | 1.535223223  | -0.432860457 | 2.05E-07 | 6.52E-07 |
| RTL9       | 2.056498606  | -0.166992178 | 2.06E-07 | 6.55E-07 |
| MAPK13     | 1.571165523  | 3.95085536   | 2.08E-07 | 6.61E-07 |
| MMP13      | 4.471818985  | -2.383538006 | 2.08E-07 | 6.61E-07 |
| AC006378.2 | 1.380243639  | -2.65535648  | 2.08E-07 | 6.63E-07 |

|             |              |              |          |          |
|-------------|--------------|--------------|----------|----------|
| COX6B2      | 2.268280445  | -2.367644995 | 2.08E-07 | 6.63E-07 |
| TPTEP1      | -1.26030054  | -1.45100887  | 2.08E-07 | 6.63E-07 |
| SMR3A       | 7.247169335  | -1.53325792  | 2.09E-07 | 6.64E-07 |
| GBP7        | -1.251186299 | 4.824793852  | 2.10E-07 | 6.68E-07 |
| ULBP1       | 1.882470544  | -1.655411007 | 2.11E-07 | 6.71E-07 |
| MFAP2       | 1.79898708   | 1.260243616  | 2.12E-07 | 6.74E-07 |
| SLC52A3     | 1.655892045  | 0.856074625  | 2.13E-07 | 6.75E-07 |
| AC012213.3  | 1.242822004  | -2.864408916 | 2.13E-07 | 6.77E-07 |
| KIF1A       | 2.809315857  | 2.546678927  | 2.15E-07 | 6.83E-07 |
| GDNF-AS1    | 2.538410501  | -0.427222541 | 2.16E-07 | 6.85E-07 |
| CACNG8      | 1.371563376  | -2.079883421 | 2.20E-07 | 6.99E-07 |
| HOXC8       | 3.710697606  | -2.471228847 | 2.23E-07 | 7.07E-07 |
| AC108865.1  | 3.900444396  | -2.945390302 | 2.26E-07 | 7.16E-07 |
| SNORA33     | 1.002086435  | -0.913113362 | 2.26E-07 | 7.16E-07 |
| PLA2R1      | -1.057596474 | 0.638688197  | 2.26E-07 | 7.16E-07 |
| STK32B      | 1.419808291  | -0.693651317 | 2.27E-07 | 7.17E-07 |
| ADAMTS9-AS1 | -1.017937726 | -1.634473873 | 2.27E-07 | 7.17E-07 |
| DCX         | 2.261404269  | -1.776225437 | 2.27E-07 | 7.19E-07 |
| NKX6-3      | 6.618720271  | -1.157812342 | 2.31E-07 | 7.30E-07 |
| CPT1C       | 1.004366229  | 0.8086143    | 2.31E-07 | 7.30E-07 |
| AC009686.2  | 1.332302884  | -1.431552335 | 2.31E-07 | 7.31E-07 |
| ROCK1P1     | 1.174479789  | -1.509779445 | 2.31E-07 | 7.31E-07 |
| WISP2       | -1.562065448 | 1.246176408  | 2.32E-07 | 7.33E-07 |
| TNFRSF9     | 2.00277673   | 1.359609659  | 2.32E-07 | 7.33E-07 |
| DAPL1       | 5.135475951  | 0.053359318  | 2.32E-07 | 7.34E-07 |
| AL645940.1  | 1.056326549  | -2.375203834 | 2.33E-07 | 7.36E-07 |
| PDZD2       | 1.05196077   | 1.254812217  | 2.35E-07 | 7.42E-07 |
| SLC28A1     | -1.252486211 | 5.406990336  | 2.36E-07 | 7.43E-07 |
| SNHG27      | 4.510860355  | -2.522743684 | 2.38E-07 | 7.49E-07 |
| ZNF788P     | 1.191927806  | 0.545256435  | 2.40E-07 | 7.57E-07 |
| PRAMEF7     | 3.621350586  | -2.594735252 | 2.41E-07 | 7.60E-07 |
| SNORA11F    | 1.145949469  | -2.817470011 | 2.42E-07 | 7.63E-07 |
| AC253536.6  | 1.428048612  | 0.022467119  | 2.42E-07 | 7.63E-07 |
| NLGN1       | 2.91366061   | -1.476145581 | 2.43E-07 | 7.65E-07 |
| AL033384.1  | 2.066554241  | -2.574498542 | 2.44E-07 | 7.67E-07 |
| HOXC10      | 4.884183879  | 0.035990837  | 2.46E-07 | 7.73E-07 |
| KIF26B      | 1.733534681  | 2.017079705  | 2.50E-07 | 7.85E-07 |
| ADRB2       | -1.006456274 | 2.89507499   | 2.50E-07 | 7.86E-07 |
| AC005740.4  | 1.017100183  | -2.853495898 | 2.53E-07 | 7.96E-07 |
| SLC5A5      | 2.463025748  | -2.185329905 | 2.54E-07 | 7.97E-07 |
| SOX21-AS1   | 3.504459807  | -2.612664623 | 2.54E-07 | 7.98E-07 |
| AC011379.2  | 1.104760728  | -1.079448691 | 2.54E-07 | 7.99E-07 |
| AC008738.2  | 1.368083483  | -2.389685091 | 2.55E-07 | 8.01E-07 |
| ANK3        | -1.13739454  | 3.017182625  | 2.57E-07 | 8.08E-07 |
| C6orf222    | 3.467185736  | -1.046712413 | 2.58E-07 | 8.09E-07 |
| AC005519.1  | 1.080352099  | -1.922351113 | 2.59E-07 | 8.11E-07 |
| FOXN4       | 2.377005501  | 1.59918314   | 2.59E-07 | 8.11E-07 |
| MKRN4P      | 3.668993915  | -2.256711291 | 2.59E-07 | 8.12E-07 |
| CHST5       | 4.221515646  | -2.069265112 | 2.60E-07 | 8.14E-07 |
| PFKP        | 1.511177521  | 4.055854785  | 2.63E-07 | 8.25E-07 |
| AL591686.1  | 5.473214207  | -2.488551486 | 2.64E-07 | 8.25E-07 |
| PQLC2L      | 3.345858629  | -1.867002147 | 2.64E-07 | 8.25E-07 |
| LINC01702   | -1.434633336 | 2.923662809  | 2.66E-07 | 8.31E-07 |
| AL390728.2  | 1.529260404  | -2.839064198 | 2.67E-07 | 8.36E-07 |
| RGSL1       | 3.125734908  | 1.078212304  | 2.67E-07 | 8.36E-07 |
| NAP1L6      | 3.235575198  | -1.775464019 | 2.68E-07 | 8.38E-07 |
| AL358394.1  | 4.781192973  | -3.209004603 | 2.69E-07 | 8.40E-07 |
| AC111182.1  | 1.716912109  | -1.600645909 | 2.70E-07 | 8.44E-07 |

|            |              |              |          |          |
|------------|--------------|--------------|----------|----------|
| ZNF714     | 1.338704902  | 0.361471324  | 2.71E-07 | 8.48E-07 |
| HSPA7      | 1.644344851  | 1.68505533   | 2.74E-07 | 8.56E-07 |
| AC008105.1 | 1.424947214  | -2.044471344 | 2.75E-07 | 8.59E-07 |
| TUBB3      | 2.027320798  | -1.438446031 | 2.75E-07 | 8.59E-07 |
| GATA2-AS1  | 1.550975944  | -0.413909467 | 2.76E-07 | 8.62E-07 |
| TACSTD2    | -1.518462845 | 2.543679033  | 2.78E-07 | 8.69E-07 |
| FBLN1      | 1.465928548  | 5.339780608  | 2.81E-07 | 8.76E-07 |
| KHDC1      | 1.910956432  | -2.041129246 | 2.84E-07 | 8.85E-07 |
| CCNI2      | 1.558866236  | -1.869462606 | 2.86E-07 | 8.90E-07 |
| PLAC4      | 5.161450423  | 0.565961339  | 2.87E-07 | 8.93E-07 |
| ERICH3     | -1.191136365 | -1.645181983 | 2.87E-07 | 8.94E-07 |
| CYP27C1    | 1.57037266   | -0.64100937  | 2.88E-07 | 8.98E-07 |
| AC138904.1 | 2.13084993   | -2.921646473 | 2.89E-07 | 8.98E-07 |
| CFAP43     | 1.081054424  | -0.380307352 | 2.91E-07 | 9.06E-07 |
| UBA52P6    | 1.218256597  | -2.898287279 | 2.92E-07 | 9.07E-07 |
| ANO9       | 1.604500366  | 2.057332858  | 2.92E-07 | 9.09E-07 |
| AC068134.3 | 1.169136405  | -2.682026591 | 2.93E-07 | 9.11E-07 |
| LINC02298  | 1.7607234    | -0.505930169 | 2.95E-07 | 9.17E-07 |
| AL158071.3 | 1.563211611  | -2.866250903 | 2.98E-07 | 9.26E-07 |
| AL355482.1 | 1.916105827  | -0.296646553 | 2.99E-07 | 9.28E-07 |
| SIPA1L2    | 1.102430001  | 4.808591703  | 3.02E-07 | 9.37E-07 |
| TEKT5      | 1.487276052  | -1.090171859 | 3.02E-07 | 9.38E-07 |
| KRTAP5-AS1 | 1.809161887  | -1.441165816 | 3.06E-07 | 9.49E-07 |
| WNT2       | -1.78631723  | -0.757212999 | 3.07E-07 | 9.51E-07 |
| AL118511.1 | 1.190356337  | -2.807314137 | 3.07E-07 | 9.53E-07 |
| AF274858.1 | 1.085080441  | 0.075534749  | 3.07E-07 | 9.53E-07 |
| VSTM5      | 1.689372099  | -2.709340624 | 3.10E-07 | 9.61E-07 |
| TSPY1      | 5.829713095  | -2.68748993  | 3.11E-07 | 9.62E-07 |
| GAL3ST4    | 1.195156779  | 1.187354156  | 3.11E-07 | 9.63E-07 |
| AC034228.1 | 5.147010438  | -2.676456891 | 3.12E-07 | 9.68E-07 |
| AC006449.2 | 1.090786598  | -2.963209286 | 3.13E-07 | 9.71E-07 |
| ACTA1      | 1.360028655  | -1.70158498  | 3.14E-07 | 9.72E-07 |
| AC073389.3 | 1.127891192  | -2.220051699 | 3.17E-07 | 9.82E-07 |
| ABCA12     | 2.494982858  | -1.569990995 | 3.19E-07 | 9.87E-07 |
| AP003716.1 | -1.35150877  | 2.753915251  | 3.23E-07 | 9.99E-07 |
| C2orf27A   | 1.149834639  | -0.209952241 | 3.24E-07 | 1.00E-06 |
| GREB1      | 1.494696584  | 3.794531646  | 3.24E-07 | 1.00E-06 |
| PPIAP9     | 1.253931006  | -2.82620089  | 3.26E-07 | 1.01E-06 |
| RIMKLB2    | 1.28550121   | -2.650847503 | 3.26E-07 | 1.01E-06 |
| AC011815.2 | 1.298970405  | -2.474385052 | 3.27E-07 | 1.01E-06 |
| VNN2       | 1.679890541  | 3.831980673  | 3.27E-07 | 1.01E-06 |
| RBM12B-AS1 | 1.018078796  | -2.434404278 | 3.28E-07 | 1.01E-06 |
| AC005534.1 | 1.178071192  | -2.541189944 | 3.29E-07 | 1.02E-06 |
| MYH3       | 1.638133109  | 2.211315537  | 3.31E-07 | 1.02E-06 |
| AC026469.1 | -1.278421301 | -1.543133807 | 3.31E-07 | 1.02E-06 |
| SMTNL2     | 1.817808425  | -2.17845803  | 3.33E-07 | 1.03E-06 |
| DCXR       | -1.018019479 | 9.434421916  | 3.34E-07 | 1.03E-06 |
| AL122125.1 | 1.306028863  | -2.897138853 | 3.37E-07 | 1.04E-06 |
| KLHL34     | 2.676656081  | -0.873074344 | 3.37E-07 | 1.04E-06 |
| MUSTN1     | 1.940452799  | -1.92317966  | 3.38E-07 | 1.04E-06 |
| HSP90AB2P  | 1.032190038  | -0.866897537 | 3.39E-07 | 1.04E-06 |
| AC102953.1 | 1.268441165  | -2.874424128 | 3.40E-07 | 1.05E-06 |
| COL4A6     | 2.361200065  | -0.214595827 | 3.40E-07 | 1.05E-06 |
| LTBP2      | 1.209131011  | 4.687227192  | 3.43E-07 | 1.05E-06 |
| AC006435.2 | 1.068008204  | -1.753278507 | 3.46E-07 | 1.06E-06 |
| CHN1       | 1.081573182  | 1.579353323  | 3.47E-07 | 1.07E-06 |
| SSC5D      | -1.100838745 | 1.563839608  | 3.47E-07 | 1.07E-06 |
| PTCRA      | -1.115632165 | -2.305589288 | 3.47E-07 | 1.07E-06 |

|             |              |              |          |          |
|-------------|--------------|--------------|----------|----------|
| AP001972.4  | 4.305508154  | -2.200434753 | 3.48E-07 | 1.07E-06 |
| STC1        | 1.091522602  | 3.593391054  | 3.48E-07 | 1.07E-06 |
| CRISP2      | 5.465682047  | -1.338418479 | 3.53E-07 | 1.08E-06 |
| SGCA        | -1.194665311 | 0.650987751  | 3.53E-07 | 1.08E-06 |
| MCOLN3      | 2.529428547  | 0.887468568  | 3.54E-07 | 1.09E-06 |
| AL353572.1  | 2.033682492  | -2.651125126 | 3.56E-07 | 1.09E-06 |
| CYP21A1P    | 1.143034719  | 2.264089408  | 3.58E-07 | 1.10E-06 |
| NRSN2       | 1.299886427  | 3.537480147  | 3.58E-07 | 1.10E-06 |
| AC132938.5  | 1.287264338  | -2.443367402 | 3.60E-07 | 1.10E-06 |
| AL121601.1  | 1.235489201  | -2.709288709 | 3.64E-07 | 1.12E-06 |
| FSTL5       | 3.672841199  | 0.489274314  | 3.64E-07 | 1.12E-06 |
| FOXD1       | 3.088226202  | -2.324846573 | 3.66E-07 | 1.12E-06 |
| ADAMTS9-AS2 | -1.015972717 | -2.120517016 | 3.70E-07 | 1.13E-06 |
| ARHGDIG     | 2.771744109  | -2.572414235 | 3.71E-07 | 1.13E-06 |
| PLA2G4F     | 3.088900412  | -1.5686415   | 3.71E-07 | 1.14E-06 |
| GRIK2       | 2.618424668  | -0.738857203 | 3.76E-07 | 1.15E-06 |
| AL138781.1  | 1.192954139  | -1.80269858  | 3.82E-07 | 1.17E-06 |
| CA9         | 3.088135263  | 3.74795352   | 3.83E-07 | 1.17E-06 |
| UGT1A1      | -1.284683268 | 6.394595728  | 3.83E-07 | 1.17E-06 |
| CT83        | 4.951809582  | -2.592214899 | 3.84E-07 | 1.17E-06 |
| MISP        | 3.105489617  | 2.860532399  | 3.86E-07 | 1.18E-06 |
| AC040173.1  | 2.96924141   | -2.451798997 | 3.92E-07 | 1.19E-06 |
| SYNGR3      | 1.830050892  | -0.542952038 | 3.94E-07 | 1.20E-06 |
| RYR2        | 2.168437343  | 0.633874987  | 3.98E-07 | 1.21E-06 |
| KIAA1549    | 1.471034739  | 2.259922803  | 3.98E-07 | 1.21E-06 |
| AC006213.3  | 1.891684488  | -2.32111315  | 4.00E-07 | 1.22E-06 |
| AC005224.3  | -1.272623145 | -2.520513251 | 4.07E-07 | 1.24E-06 |
| STAC2       | 3.124169059  | -2.474847179 | 4.08E-07 | 1.24E-06 |
| AC083843.3  | 1.066047702  | -0.073924514 | 4.13E-07 | 1.25E-06 |
| CCDC144NL   | 3.998765308  | -2.875170326 | 4.14E-07 | 1.26E-06 |
| REN         | 1.963366901  | 1.103053715  | 4.14E-07 | 1.26E-06 |
| AC022098.2  | 3.567270049  | -2.723356927 | 4.15E-07 | 1.26E-06 |
| GAS1        | -1.151308692 | 0.735948822  | 4.20E-07 | 1.27E-06 |
| GCG         | 5.377450628  | -1.10360869  | 4.24E-07 | 1.29E-06 |
| AC026992.2  | 2.270453455  | -2.583183348 | 4.25E-07 | 1.29E-06 |
| PKIA        | 1.998861749  | -0.130849312 | 4.27E-07 | 1.30E-06 |
| SLC47A2     | 1.123419495  | -0.922271012 | 4.29E-07 | 1.30E-06 |
| RIPPLY3     | 1.808761346  | -0.550031521 | 4.31E-07 | 1.31E-06 |
| ERVH48-1    | 2.862737086  | -1.026197897 | 4.33E-07 | 1.31E-06 |
| GPR1-AS     | 4.989768306  | -1.380774818 | 4.34E-07 | 1.31E-06 |
| AC095057.3  | 1.017801689  | -0.802632586 | 4.38E-07 | 1.33E-06 |
| CRACR2B     | 1.292362913  | 2.711818986  | 4.38E-07 | 1.33E-06 |
| AC012485.2  | 1.440412807  | -2.9103128   | 4.40E-07 | 1.33E-06 |
| AC126175.1  | 4.21864402   | -2.888674967 | 4.42E-07 | 1.34E-06 |
| SLC45A2     | 1.864572746  | 0.178836104  | 4.46E-07 | 1.35E-06 |
| C19orf33    | 2.162376888  | 0.771913657  | 4.47E-07 | 1.35E-06 |
| ZNF735      | 5.320621043  | -2.584639396 | 4.47E-07 | 1.35E-06 |
| TMEM45A     | -1.201346693 | 5.282841254  | 4.49E-07 | 1.36E-06 |
| DLGAP2      | -1.640666619 | -2.070667633 | 4.52E-07 | 1.37E-06 |
| GJB3        | -1.561074647 | -0.048076148 | 4.53E-07 | 1.37E-06 |
| PCDHB3      | 1.906487312  | -0.346531    | 4.53E-07 | 1.37E-06 |
| HBA1        | -1.486007087 | -2.00787794  | 4.54E-07 | 1.37E-06 |
| SLC5A2      | 1.298660791  | -1.227114658 | 4.58E-07 | 1.38E-06 |
| AL590004.3  | 1.748786907  | 0.447231821  | 4.58E-07 | 1.38E-06 |
| BDKRB2      | 1.389091317  | 2.466197631  | 4.61E-07 | 1.39E-06 |
| UTS2B       | 1.938582682  | -0.810115631 | 4.80E-07 | 1.45E-06 |
| GOLGA2P11   | 3.135536163  | -2.762846421 | 4.85E-07 | 1.46E-06 |
| AL807757.2  | 1.464590988  | -2.09338274  | 4.88E-07 | 1.47E-06 |



|            |              |              |          |          |
|------------|--------------|--------------|----------|----------|
| ASRGL1     | 1.184207192  | 2.651898716  | 4.89E-07 | 1.47E-06 |
| C5orf66    | 1.523107032  | -0.128792715 | 4.89E-07 | 1.47E-06 |
| AL356490.1 | 1.664661466  | -2.329105984 | 4.89E-07 | 1.47E-06 |
| ADAM21     | 1.565054083  | -2.224050426 | 4.92E-07 | 1.48E-06 |
| ARMC12     | 1.030831433  | -0.934560035 | 4.95E-07 | 1.49E-06 |
| PEX5L      | 1.341035174  | -2.847505856 | 4.97E-07 | 1.49E-06 |
| SLC2A6     | 1.089646958  | 3.150271044  | 5.03E-07 | 1.51E-06 |
| GFAP       | 2.28848044   | 0.571067712  | 5.04E-07 | 1.51E-06 |
| OR7E29P    | -1.380086587 | -2.489890867 | 5.04E-07 | 1.52E-06 |
| ZNF726     | 1.26823929   | 1.071301322  | 5.08E-07 | 1.52E-06 |
| ATAD3C     | -1.252771263 | 1.777913673  | 5.08E-07 | 1.52E-06 |
| MGAM2      | 3.241835183  | 0.748559323  | 5.14E-07 | 1.54E-06 |
| TRPC4      | 1.394177362  | -0.880319935 | 5.15E-07 | 1.55E-06 |
| AC064807.2 | 2.46842462   | -2.463759423 | 5.16E-07 | 1.55E-06 |
| UGT2B27P   | -1.213264899 | 1.958981839  | 5.17E-07 | 1.55E-06 |
| PTF1A      | 4.818475164  | -2.433005608 | 5.19E-07 | 1.56E-06 |
| AC092598.1 | 3.620250569  | -2.819579963 | 5.24E-07 | 1.57E-06 |
| NWD2       | 3.12550549   | 0.091480054  | 5.27E-07 | 1.58E-06 |
| ZNF93      | 1.164561077  | 0.472168186  | 5.29E-07 | 1.58E-06 |
| PLPP2      | 2.080817399  | 4.331416412  | 5.29E-07 | 1.58E-06 |
| FZD9       | 2.39113901   | -0.23038911  | 5.30E-07 | 1.59E-06 |
| TSPY10     | 5.921171624  | -2.636410934 | 5.32E-07 | 1.59E-06 |
| TMEM72     | 2.445416721  | -0.424733976 | 5.34E-07 | 1.60E-06 |
| TCP1P3     | 3.149971076  | -1.205470793 | 5.40E-07 | 1.61E-06 |
| CDH16      | 2.499279718  | 1.3950544    | 5.42E-07 | 1.62E-06 |
| SULT2A1    | -1.121965844 | 9.0960308    | 5.52E-07 | 1.65E-06 |
| ULK4       | 1.115052935  | 2.637837382  | 5.52E-07 | 1.65E-06 |
| LRP4       | 1.650269693  | 1.881666926  | 5.56E-07 | 1.66E-06 |
| BMP7       | 3.652433956  | 0.25564083   | 5.57E-07 | 1.66E-06 |
| SNCAIP     | 1.45728633   | 1.600711009  | 5.60E-07 | 1.67E-06 |
| CLVS2      | 4.877743617  | 0.234613855  | 5.62E-07 | 1.68E-06 |
| HSD17B3    | 1.216799286  | 1.234068407  | 5.62E-07 | 1.68E-06 |
| GSPT2      | -1.112572831 | 2.904007727  | 5.62E-07 | 1.68E-06 |
| DNAH10OS   | 1.085392863  | 0.270727869  | 5.65E-07 | 1.68E-06 |
| AC018638.6 | 1.472058324  | -2.333424776 | 5.68E-07 | 1.69E-06 |
| AC006213.4 | 1.047114678  | -1.058639591 | 5.72E-07 | 1.70E-06 |
| EDDM3A     | 7.119059832  | -1.385767818 | 5.75E-07 | 1.71E-06 |
| OLIG3      | 5.426267727  | -2.82307886  | 5.79E-07 | 1.72E-06 |
| SST        | 8.512359201  | 1.497775189  | 5.84E-07 | 1.74E-06 |
| MATN4      | 2.852334581  | -0.638492122 | 5.86E-07 | 1.74E-06 |
| TRAPPC13P1 | 2.233711902  | -1.509527639 | 5.86E-07 | 1.74E-06 |
| PNMT       | 2.757678385  | -0.931768697 | 5.94E-07 | 1.77E-06 |
| ARG1       | -1.08565853  | 8.532640876  | 5.95E-07 | 1.77E-06 |
| LINC00479  | 1.582450148  | -2.048180814 | 6.02E-07 | 1.79E-06 |
| AP000844.2 | 4.471427682  | -2.659778007 | 6.15E-07 | 1.83E-06 |
| TIMM8AP1   | 1.265974387  | -2.23706094  | 6.16E-07 | 1.83E-06 |
| OTC        | -1.129505075 | 6.729874701  | 6.17E-07 | 1.83E-06 |
| TSPAN11    | -1.128393785 | -0.110328216 | 6.19E-07 | 1.84E-06 |
| AC067930.3 | 1.36838217   | -2.910211652 | 6.25E-07 | 1.85E-06 |
| AC006330.1 | 1.045172946  | -2.943033    | 6.26E-07 | 1.86E-06 |
| SPATA31D1  | 4.929811287  | -3.112100316 | 6.26E-07 | 1.86E-06 |
| REC114     | 3.188028571  | -3.030650695 | 6.35E-07 | 1.88E-06 |
| USH2A      | -1.211211476 | 3.379984587  | 6.38E-07 | 1.89E-06 |
| FAR2P4     | 4.129307055  | -2.006712008 | 6.41E-07 | 1.90E-06 |
| AGR2       | 4.000206632  | 4.660621717  | 6.44E-07 | 1.91E-06 |
| LINC00668  | 3.572936606  | -1.154792813 | 6.49E-07 | 1.92E-06 |
| PLPP7      | 1.437546535  | -0.43466152  | 6.50E-07 | 1.92E-06 |
| MLIP       | -1.068253116 | 3.964362582  | 6.52E-07 | 1.93E-06 |

|            |              |              |          |          |
|------------|--------------|--------------|----------|----------|
| AL109917.1 | 1.128214486  | -1.196580526 | 6.55E-07 | 1.94E-06 |
| AL109918.1 | 1.176186479  | 3.747194196  | 6.60E-07 | 1.95E-06 |
| CASQ1      | 1.577576675  | -2.18703761  | 6.60E-07 | 1.95E-06 |
| LINC01238  | 1.043196331  | -1.401368855 | 6.62E-07 | 1.96E-06 |
| SOX4       | 1.212184699  | 4.964511345  | 6.62E-07 | 1.96E-06 |
| AC024560.1 | 1.629606158  | -2.324287101 | 6.68E-07 | 1.97E-06 |
| TRIM73     | 1.333866356  | -1.656929581 | 6.71E-07 | 1.98E-06 |
| ZNF878     | -1.136959504 | -2.536546991 | 6.76E-07 | 2.00E-06 |
| NKAIN2     | 2.309917682  | -0.084135822 | 6.78E-07 | 2.00E-06 |
| HOXB9      | 3.397261522  | -1.083819652 | 6.81E-07 | 2.01E-06 |
| MUC5AC     | 5.584828605  | 2.409153749  | 6.84E-07 | 2.02E-06 |
| LINC00189  | 2.015147505  | -0.839755325 | 6.92E-07 | 2.04E-06 |
| AC069218.1 | 1.276093414  | -2.515788486 | 6.93E-07 | 2.04E-06 |
| KLHDC7B    | 1.407111724  | 1.14435954   | 6.94E-07 | 2.05E-06 |
| AC123912.3 | 3.911621741  | -2.754233487 | 6.95E-07 | 2.05E-06 |
| AC011503.2 | 1.310680834  | -0.273959933 | 6.96E-07 | 2.05E-06 |
| CRYBB1     | 2.110313301  | 0.579283741  | 6.99E-07 | 2.06E-06 |
| CCR10      | 1.295405233  | -0.943393279 | 7.02E-07 | 2.07E-06 |
| AC006042.1 | 1.284040782  | -1.707540953 | 7.03E-07 | 2.07E-06 |
| HSD3BP5    | 1.575231659  | -3.013809592 | 7.04E-07 | 2.08E-06 |
| FASN       | 1.003962727  | 9.374362016  | 7.06E-07 | 2.08E-06 |
| PCDHB11    | 1.541368825  | -0.021830472 | 7.11E-07 | 2.10E-06 |
| AC239859.6 | 1.850921482  | -2.606866092 | 7.12E-07 | 2.10E-06 |
| AC023824.6 | 4.486554001  | -2.633048885 | 7.17E-07 | 2.11E-06 |
| LINC02506  | 3.32576685   | 0.477969829  | 7.20E-07 | 2.12E-06 |
| SOX2       | 3.336153803  | -0.435738921 | 7.23E-07 | 2.13E-06 |
| AC233992.3 | 1.111308502  | -2.68251612  | 7.24E-07 | 2.13E-06 |
| AC069061.2 | 5.161615679  | -2.992589254 | 7.26E-07 | 2.13E-06 |
| RN7SKP23   | 1.174386674  | -2.955176798 | 7.27E-07 | 2.14E-06 |
| AC097512.1 | 3.612569609  | -2.816679942 | 7.34E-07 | 2.16E-06 |
| ZNF571-AS1 | 1.286251278  | -2.053416351 | 7.40E-07 | 2.17E-06 |
| FRZB       | 1.096866253  | 2.90310396   | 7.42E-07 | 2.18E-06 |
| IGLV8-61   | -2.018204435 | 2.086948467  | 7.46E-07 | 2.19E-06 |
| AC073073.1 | 1.341566507  | -2.011808337 | 7.52E-07 | 2.21E-06 |
| GLYATL1P4  | 2.740568882  | -0.666170589 | 7.53E-07 | 2.21E-06 |
| TWIST1     | 2.040043246  | -0.493668495 | 7.66E-07 | 2.25E-06 |
| HS3ST4     | 5.82487253   | 0.611168294  | 7.71E-07 | 2.26E-06 |
| AC020978.9 | 1.325444843  | -2.388229681 | 7.72E-07 | 2.26E-06 |
| DEFB132    | 2.626792786  | 0.622607653  | 7.75E-07 | 2.27E-06 |
| UAP1L1     | 1.328341725  | 2.92996019   | 7.78E-07 | 2.28E-06 |
| FOXG1      | 5.670367912  | -2.238219611 | 7.86E-07 | 2.30E-06 |
| NOV        | 1.113555659  | 1.261488105  | 7.95E-07 | 2.32E-06 |
| SAGE1      | 5.146231424  | -1.749253614 | 7.99E-07 | 2.34E-06 |
| SLC5A4     | 1.301400435  | -2.094576815 | 8.03E-07 | 2.35E-06 |
| AL360270.3 | 1.11073755   | -2.304272423 | 8.05E-07 | 2.35E-06 |
| MLLT11     | 1.320836521  | 2.46298771   | 8.09E-07 | 2.36E-06 |
| AC005387.1 | 1.1068511    | -2.769541731 | 8.10E-07 | 2.37E-06 |
| ANKRD26P1  | 5.237477178  | -0.731122702 | 8.14E-07 | 2.38E-06 |
| EYA2       | -1.324534127 | 0.519347734  | 8.25E-07 | 2.41E-06 |
| MED12L     | -1.002547787 | -2.02079934  | 8.27E-07 | 2.41E-06 |
| LINC02384  | 2.162969578  | 1.846154368  | 8.29E-07 | 2.42E-06 |
| HOPX       | 1.250450354  | 1.494387102  | 8.29E-07 | 2.42E-06 |
| KIAA1024   | 1.507478247  | -1.662207295 | 8.31E-07 | 2.42E-06 |
| CCDC141    | -1.232357348 | -1.134847318 | 8.42E-07 | 2.45E-06 |
| LINC00513  | 1.401186403  | -0.066102757 | 8.50E-07 | 2.47E-06 |
| AC006206.2 | 3.497212432  | -1.969830042 | 8.54E-07 | 2.49E-06 |
| AC112219.2 | 1.453665082  | -2.874959728 | 8.56E-07 | 2.49E-06 |
| MIR17HG    | 1.120922911  | -0.330193825 | 8.68E-07 | 2.52E-06 |

|             |              |              |          |          |
|-------------|--------------|--------------|----------|----------|
| SLC44A3-AS1 | 1.268498258  | -0.651795878 | 8.70E-07 | 2.53E-06 |
| AP001065.1  | -1.044896311 | 1.0232027    | 8.72E-07 | 2.53E-06 |
| CORO6       | 1.112774955  | -0.643749361 | 8.74E-07 | 2.54E-06 |
| CSAG4       | 4.146525325  | -2.702772475 | 8.74E-07 | 2.54E-06 |
| PRRT4       | 1.685977224  | -0.685035364 | 8.77E-07 | 2.55E-06 |
| EGFR-AS1    | 2.486580693  | 1.031826902  | 8.88E-07 | 2.58E-06 |
| B3GNT3      | 1.862984944  | 3.718176136  | 8.90E-07 | 2.58E-06 |
| VGf         | 2.077824127  | 0.016097424  | 8.91E-07 | 2.59E-06 |
| ZNF534      | 2.572398522  | -2.679811714 | 8.92E-07 | 2.59E-06 |
| ATP10A      | 1.510188035  | 1.862934379  | 9.06E-07 | 2.63E-06 |
| IQCH        | 1.47546524   | 1.113317432  | 9.08E-07 | 2.63E-06 |
| KCNK17      | -1.337572062 | -0.096457326 | 9.13E-07 | 2.65E-06 |
| LINC02154   | 3.262930169  | -3.124727499 | 9.26E-07 | 2.68E-06 |
| BNIP3P11    | 1.168385904  | -2.111936856 | 9.31E-07 | 2.69E-06 |
| SMC2-AS1    | 1.251243841  | -2.984491207 | 9.32E-07 | 2.70E-06 |
| C9orf152    | 1.824957117  | 1.386078146  | 9.42E-07 | 2.73E-06 |
| SERTAD4     | 1.833114958  | -0.184608821 | 9.49E-07 | 2.75E-06 |
| PRAMEF15    | 4.091498045  | -0.516404354 | 9.54E-07 | 2.76E-06 |
| SIGLEC15    | 1.662759761  | 1.450633705  | 9.62E-07 | 2.78E-06 |
| ANO1        | -1.12341785  | 6.113439549  | 9.70E-07 | 2.80E-06 |
| RAVER2      | 1.0642901    | 2.475093088  | 9.73E-07 | 2.81E-06 |
| RNA5-8SP6   | -2.816982449 | -2.802460077 | 9.74E-07 | 2.81E-06 |
| TUBB8P7     | 2.133794077  | -2.952384928 | 9.74E-07 | 2.81E-06 |
| AC118754.1  | -1.110503606 | -2.442618858 | 9.79E-07 | 2.83E-06 |
| NKX2-5      | 4.018542752  | -2.660169317 | 9.79E-07 | 2.83E-06 |
| KCNF1       | 2.325289641  | 0.436805984  | 9.80E-07 | 2.83E-06 |
| ZIM2-AS1    | 2.206724786  | -2.349648677 | 9.87E-07 | 2.85E-06 |
| AHNAK2      | 2.042098563  | 2.473920244  | 9.88E-07 | 2.85E-06 |
| AGTR2       | 4.602129856  | -3.01985153  | 9.89E-07 | 2.85E-06 |
| DRICH1      | 1.149479917  | -2.382871143 | 9.90E-07 | 2.85E-06 |
| SPEG        | 1.791786804  | 1.011093677  | 9.92E-07 | 2.86E-06 |
| SLC10A4     | 2.145302331  | -3.022338945 | 9.94E-07 | 2.87E-06 |
| NUDT11      | 2.400193404  | -1.705793261 | 9.95E-07 | 2.87E-06 |
| AC011840.1  | 4.823352296  | -2.455262829 | 1.03E-06 | 2.96E-06 |
| AC067930.5  | 1.456091131  | -2.466044383 | 1.03E-06 | 2.97E-06 |
| AC092159.2  | 1.980645048  | -3.051385482 | 1.04E-06 | 2.98E-06 |
| LINC01625   | -1.534413035 | -1.063805325 | 1.04E-06 | 2.99E-06 |
| SLC39A5     | -1.147120078 | 6.872342178  | 1.05E-06 | 3.02E-06 |
| MYBPC2      | 2.37390229   | -2.012077947 | 1.05E-06 | 3.03E-06 |
| SPEF1       | 1.399309654  | -2.208043893 | 1.06E-06 | 3.03E-06 |
| AC027117.1  | 1.313341874  | -1.153564416 | 1.06E-06 | 3.03E-06 |
| CELA3B      | 3.779222222  | -2.946068358 | 1.06E-06 | 3.05E-06 |
| GRIA2       | 3.454481248  | -2.13367162  | 1.06E-06 | 3.05E-06 |
| ITGA11      | 1.074646216  | 2.028393524  | 1.07E-06 | 3.08E-06 |
| PTGFR       | 2.062646758  | 2.608952746  | 1.07E-06 | 3.08E-06 |
| PODXL2      | 2.051989083  | 3.084091892  | 1.08E-06 | 3.09E-06 |
| AP001331.1  | 3.109977573  | -2.412628677 | 1.08E-06 | 3.10E-06 |
| FMN2        | 3.483298092  | -1.385738961 | 1.09E-06 | 3.12E-06 |
| GPX8        | 1.007051848  | 1.999811887  | 1.09E-06 | 3.13E-06 |
| AL136528.1  | 2.379331462  | -2.16180882  | 1.10E-06 | 3.15E-06 |
| GUCA2A      | 2.811990329  | -0.767673174 | 1.10E-06 | 3.15E-06 |
| GDF10       | 2.763000807  | -0.415930143 | 1.10E-06 | 3.16E-06 |
| AL356966.1  | 1.373307691  | -2.372310957 | 1.10E-06 | 3.16E-06 |
| AP003171.1  | 4.873546123  | -2.79821354  | 1.11E-06 | 3.18E-06 |
| TMEM40      | 1.95360825   | -1.007378046 | 1.12E-06 | 3.21E-06 |
| AC019109.1  | 3.317992459  | -2.655573833 | 1.12E-06 | 3.22E-06 |
| IGHV2-70D   | -1.917994289 | -2.305314476 | 1.13E-06 | 3.23E-06 |
| SALL2       | 1.471315515  | 2.04040636   | 1.14E-06 | 3.25E-06 |

|            |              |              |          |          |
|------------|--------------|--------------|----------|----------|
| AC026356.1 | 1.045254062  | -1.761796465 | 1.15E-06 | 3.29E-06 |
| AC068506.1 | 2.098244164  | -1.079791692 | 1.16E-06 | 3.31E-06 |
| AQP6       | 2.887027686  | 1.469394076  | 1.16E-06 | 3.32E-06 |
| DAO        | -1.040066158 | 5.824519913  | 1.17E-06 | 3.33E-06 |
| LINC01754  | 1.945479388  | -2.593116706 | 1.17E-06 | 3.35E-06 |
| MKRN2OS    | 1.473873188  | -1.215206537 | 1.17E-06 | 3.35E-06 |
| SLC39A4    | 1.697449121  | 4.206123807  | 1.18E-06 | 3.36E-06 |
| SH3RF3     | 1.255445368  | 2.505424034  | 1.18E-06 | 3.37E-06 |
| ADRA1D     | 2.431016282  | 0.043235807  | 1.18E-06 | 3.38E-06 |
| SCN5A      | 2.047773689  | -2.270178058 | 1.19E-06 | 3.38E-06 |
| GPR50      | 6.897817247  | 0.170283453  | 1.19E-06 | 3.40E-06 |
| AC126603.1 | 2.136950346  | -1.940371431 | 1.20E-06 | 3.42E-06 |
| AC087239.1 | 1.14364538   | -2.480562403 | 1.21E-06 | 3.44E-06 |
| CYP2E1     | -1.531529064 | 11.65959573  | 1.22E-06 | 3.46E-06 |
| XKRX       | 1.607843484  | -2.442010727 | 1.22E-06 | 3.48E-06 |
| AL139246.2 | 1.40034281   | -2.785900487 | 1.23E-06 | 3.51E-06 |
| MAGEA4     | 6.422955888  | 0.315210567  | 1.24E-06 | 3.54E-06 |
| SLC13A5    | -1.123004486 | 8.165620849  | 1.27E-06 | 3.60E-06 |
| SCUBE1     | 2.011628112  | 4.223269431  | 1.27E-06 | 3.61E-06 |
| PDE6A      | 1.415125767  | -2.79233487  | 1.28E-06 | 3.62E-06 |
| QRFP       | 1.12884695   | -2.839547079 | 1.28E-06 | 3.63E-06 |
| UGT1A7     | 2.394105342  | -0.528814488 | 1.28E-06 | 3.65E-06 |
| GPR61      | 1.168372016  | -2.621099939 | 1.29E-06 | 3.65E-06 |
| ZNF90      | 1.429293559  | -0.689329812 | 1.29E-06 | 3.66E-06 |
| ERICH5     | 1.55869368   | 5.095841554  | 1.30E-06 | 3.67E-06 |
| HERC2P3    | 1.622222395  | 0.789702766  | 1.30E-06 | 3.69E-06 |
| AC009093.5 | -1.363337925 | -1.386580431 | 1.30E-06 | 3.70E-06 |
| LRFN2      | 2.229969304  | -2.382579972 | 1.32E-06 | 3.73E-06 |
| DNAH11     | 1.579144838  | 1.277862655  | 1.32E-06 | 3.73E-06 |
| CARM1P1    | 4.596088325  | -2.819896553 | 1.32E-06 | 3.74E-06 |
| SHISAL2A   | 1.708314449  | -0.509177726 | 1.32E-06 | 3.74E-06 |
| TECRL      | 4.610241842  | -2.431906036 | 1.32E-06 | 3.74E-06 |
| PHLDA3     | 1.253180495  | 4.139396307  | 1.37E-06 | 3.86E-06 |
| USH1C      | 2.677811731  | 3.62748751   | 1.38E-06 | 3.90E-06 |
| FZD10-DT   | 1.64504239   | -1.952244363 | 1.39E-06 | 3.92E-06 |
| AC020661.1 | 1.12550315   | -2.809832324 | 1.39E-06 | 3.93E-06 |
| MKRN9P     | 3.462371204  | -2.954004823 | 1.40E-06 | 3.95E-06 |
| UGT1A5     | 2.651604932  | -1.441580395 | 1.40E-06 | 3.96E-06 |
| CACNA1G    | 2.060952487  | -2.764476026 | 1.41E-06 | 3.99E-06 |
| SGSM1      | 1.293387307  | 0.411832365  | 1.42E-06 | 4.00E-06 |
| DPEP1      | 2.29591567   | 1.028669105  | 1.42E-06 | 4.00E-06 |
| QPCT       | 1.378551238  | 1.714421974  | 1.42E-06 | 4.01E-06 |
| FETUB      | -1.212596196 | 6.671178074  | 1.45E-06 | 4.08E-06 |
| ADIG       | 2.303594633  | -2.774303089 | 1.46E-06 | 4.10E-06 |
| SLC8A2     | 1.90904098   | -2.538044596 | 1.46E-06 | 4.11E-06 |
| PROKR1     | 2.420708261  | -2.409632888 | 1.46E-06 | 4.12E-06 |
| LINC01793  | 4.280865737  | -2.497604367 | 1.47E-06 | 4.12E-06 |
| ATP4A      | 3.32621252   | -2.321300876 | 1.50E-06 | 4.21E-06 |
| CUBN       | 1.101267762  | -0.454102995 | 1.50E-06 | 4.21E-06 |
| HSPB3      | 4.322599661  | -3.012100262 | 1.50E-06 | 4.22E-06 |
| LINC01559  | 3.690768661  | -0.677171468 | 1.51E-06 | 4.24E-06 |
| GALNT13    | 1.913256652  | -1.728694808 | 1.51E-06 | 4.25E-06 |
| PRELID3A   | 1.214246634  | -1.023250324 | 1.52E-06 | 4.26E-06 |
| AL356317.1 | -1.111558817 | -2.414255623 | 1.52E-06 | 4.26E-06 |
| GALR2      | 1.403936023  | -2.433866755 | 1.52E-06 | 4.27E-06 |
| TNNT3      | 2.172794064  | -1.60750687  | 1.52E-06 | 4.27E-06 |
| EFHC2      | 2.344111631  | -2.216526179 | 1.55E-06 | 4.33E-06 |
| AL442125.1 | 1.070845657  | -2.08198877  | 1.56E-06 | 4.36E-06 |

|            |              |              |          |          |
|------------|--------------|--------------|----------|----------|
| AC006205.2 | 2.343554707  | 1.895609744  | 1.56E-06 | 4.38E-06 |
| RBM20      | 1.536089322  | -0.293452875 | 1.58E-06 | 4.42E-06 |
| PKD1L1     | 1.166829515  | -0.93583952  | 1.59E-06 | 4.44E-06 |
| DPYSL4     | 1.802528815  | -0.365468878 | 1.59E-06 | 4.45E-06 |
| CD177      | 2.462955714  | -0.416628657 | 1.60E-06 | 4.47E-06 |
| KCNIP3     | 1.545850839  | 1.707129368  | 1.61E-06 | 4.50E-06 |
| SOAT2      | 2.015139064  | 3.136038793  | 1.62E-06 | 4.53E-06 |
| AC144833.1 | 4.4826163    | -2.022013506 | 1.62E-06 | 4.54E-06 |
| SALL3      | 5.516872492  | -2.209730008 | 1.63E-06 | 4.54E-06 |
| IL31RA     | 2.344197862  | -2.411760959 | 1.63E-06 | 4.55E-06 |
| PPARGC1A   | -1.066247016 | 5.91155415   | 1.63E-06 | 4.56E-06 |
| LINC01348  | -1.15121386  | 3.930401193  | 1.64E-06 | 4.57E-06 |
| MYRFL      | 1.495954914  | -1.861125364 | 1.64E-06 | 4.59E-06 |
| LINC02127  | 1.42815233   | -2.44545032  | 1.65E-06 | 4.59E-06 |
| OFCC1      | 3.886198097  | -2.895156816 | 1.66E-06 | 4.64E-06 |
| MRC1       | -1.116541426 | 4.956009061  | 1.67E-06 | 4.65E-06 |
| AC027279.2 | 1.506594192  | -2.82298045  | 1.68E-06 | 4.67E-06 |
| SMIM31     | 3.552539277  | 0.062385563  | 1.68E-06 | 4.69E-06 |
| GJA3       | 2.148033095  | -2.132400121 | 1.69E-06 | 4.70E-06 |
| ADGRG1     | 1.058969917  | 4.508987932  | 1.69E-06 | 4.71E-06 |
| AMN        | -1.24354927  | 5.26438624   | 1.72E-06 | 4.79E-06 |
| HTR4       | 1.871595043  | -1.427282725 | 1.72E-06 | 4.79E-06 |
| NDST1-AS1  | 1.689233185  | -1.131868291 | 1.75E-06 | 4.85E-06 |
| MUC12      | 2.463340699  | 0.716214737  | 1.75E-06 | 4.85E-06 |
| AC006273.1 | 1.799661593  | -2.262053441 | 1.75E-06 | 4.86E-06 |
| AC060780.1 | 1.001803833  | -0.354305377 | 1.75E-06 | 4.86E-06 |
| ZNF239     | 1.366044367  | 0.45923595   | 1.77E-06 | 4.92E-06 |
| LINC01018  | -1.458551201 | 5.611792316  | 1.80E-06 | 5.00E-06 |
| PDCD6IPP2  | 1.458183817  | -1.481026229 | 1.81E-06 | 5.01E-06 |
| ZNF426-DT  | 1.231573554  | -1.677473212 | 1.81E-06 | 5.01E-06 |
| AC092045.1 | 1.247420301  | -2.843531628 | 1.83E-06 | 5.06E-06 |
| JPH1       | 1.809815816  | 0.573546997  | 1.83E-06 | 5.06E-06 |
| SEMA3B-AS1 | 1.252421924  | -1.142952186 | 1.84E-06 | 5.08E-06 |
| UBE2SP1    | 1.204638231  | -1.954863938 | 1.86E-06 | 5.15E-06 |
| MGAT5B     | 1.797900914  | -1.400163565 | 1.88E-06 | 5.19E-06 |
| AC243965.2 | 1.218404338  | -2.496579551 | 1.89E-06 | 5.22E-06 |
| NLRP4      | 3.859529625  | -2.383275151 | 1.90E-06 | 5.24E-06 |
| KRT81      | 2.15247341   | -0.759002002 | 1.90E-06 | 5.25E-06 |
| C1orf105   | 1.126160207  | -0.91188269  | 1.91E-06 | 5.26E-06 |
| SLC7A14    | 2.474012533  | -0.863979885 | 1.93E-06 | 5.31E-06 |
| CR589904.1 | 4.133523001  | -2.046775209 | 1.93E-06 | 5.32E-06 |
| MT1JP      | -2.010545986 | -1.556646159 | 1.94E-06 | 5.35E-06 |
| LRRN4CL    | 2.192192106  | -1.401860792 | 1.97E-06 | 5.42E-06 |
| AC009108.3 | 1.17440923   | -2.319677329 | 1.97E-06 | 5.44E-06 |
| LINC01361  | 3.533574358  | -2.283764634 | 1.98E-06 | 5.44E-06 |
| MMP17      | 1.806628686  | 0.828901909  | 1.98E-06 | 5.46E-06 |
| AC010616.1 | 2.309226245  | -2.153360444 | 1.99E-06 | 5.49E-06 |
| ITLN2      | 1.822904302  | 0.011494026  | 1.99E-06 | 5.49E-06 |
| ZBTB32     | 1.086070015  | -1.596173952 | 2.03E-06 | 5.57E-06 |
| BCL2L15    | 1.520659763  | -1.021060034 | 2.04E-06 | 5.62E-06 |
| AC119150.1 | 1.939029622  | -1.751863154 | 2.04E-06 | 5.62E-06 |
| CNN2P1     | 1.139717904  | -2.119066386 | 2.06E-06 | 5.65E-06 |
| AC005329.1 | 1.428138929  | -0.880056095 | 2.07E-06 | 5.67E-06 |
| HNRNPA1P8  | 1.137242193  | -2.947022509 | 2.08E-06 | 5.72E-06 |
| KEL        | 2.406933398  | 1.61804784   | 2.11E-06 | 5.78E-06 |
| ZNF610     | 1.344438206  | -0.378122386 | 2.11E-06 | 5.78E-06 |
| LINC01819  | 3.571406719  | -1.551160519 | 2.13E-06 | 5.83E-06 |
| LINC01843  | 1.154852086  | 1.709571079  | 2.18E-06 | 5.97E-06 |

|            |              |              |          |          |
|------------|--------------|--------------|----------|----------|
| CACNA1B    | 3.010393609  | -2.738705123 | 2.19E-06 | 6.00E-06 |
| SLCO2A1    | 1.200647474  | 3.48873075   | 2.20E-06 | 6.02E-06 |
| SLC12A1    | 2.983869192  | 1.569644218  | 2.21E-06 | 6.05E-06 |
| PCDHB10    | 1.232017769  | -0.728505693 | 2.22E-06 | 6.07E-06 |
| FSIP2      | 1.593151219  | -0.839139413 | 2.25E-06 | 6.15E-06 |
| SLITRK4    | 1.793821765  | -0.971670156 | 2.25E-06 | 6.16E-06 |
| FAM135B    | 1.836154943  | -0.133841095 | 2.26E-06 | 6.19E-06 |
| GLULP4     | 1.989791537  | -2.496208692 | 2.27E-06 | 6.20E-06 |
| GUCY2EP    | 1.924649508  | -1.649639632 | 2.31E-06 | 6.32E-06 |
| TMEM270    | 1.920848259  | -1.897297105 | 2.32E-06 | 6.35E-06 |
| AL162741.1 | 1.102831914  | -2.5586051   | 2.33E-06 | 6.36E-06 |
| AC099684.1 | -1.080291674 | -0.186524805 | 2.36E-06 | 6.43E-06 |
| AGAP1-IT1  | -1.166600037 | -0.221251597 | 2.37E-06 | 6.45E-06 |
| AC010547.2 | -2.05218513  | -1.044203871 | 2.37E-06 | 6.46E-06 |
| DUSP15     | 1.558451364  | -0.301990064 | 2.37E-06 | 6.46E-06 |
| AC139769.1 | 1.73808004   | -1.125878629 | 2.37E-06 | 6.46E-06 |
| AL390719.1 | 1.287492978  | 0.894467951  | 2.37E-06 | 6.46E-06 |
| AC103770.1 | 4.041241861  | -2.3040976   | 2.38E-06 | 6.48E-06 |
| COLGALT2   | 1.565252191  | 0.013159296  | 2.39E-06 | 6.50E-06 |
| ARHGAP40   | 2.714365199  | -1.43182879  | 2.39E-06 | 6.51E-06 |
| COL4A5     | 1.738316443  | 2.822616056  | 2.39E-06 | 6.51E-06 |
| TAC4       | 1.203522893  | -2.966285259 | 2.39E-06 | 6.51E-06 |
| CHST4      | -1.914178422 | 1.989940666  | 2.41E-06 | 6.56E-06 |
| NBPF13P    | -1.131403315 | 1.962002777  | 2.42E-06 | 6.59E-06 |
| NTN5       | 1.097853205  | -1.748407446 | 2.43E-06 | 6.62E-06 |
| HRG        | -1.170621359 | 11.21046171  | 2.44E-06 | 6.63E-06 |
| AC011247.1 | 1.282828052  | -2.547149436 | 2.46E-06 | 6.68E-06 |
| HRK        | 3.027644932  | -2.251370592 | 2.46E-06 | 6.70E-06 |
| CRYAB      | 1.700478008  | 4.269452715  | 2.48E-06 | 6.75E-06 |
| CEACAM7    | 6.160210642  | 2.916255273  | 2.50E-06 | 6.80E-06 |
| PRELP      | -1.146373483 | 4.326852444  | 2.51E-06 | 6.81E-06 |
| GLDCP1     | -1.011741001 | -1.166713991 | 2.51E-06 | 6.82E-06 |
| NCR1       | -1.103464575 | -2.149957937 | 2.51E-06 | 6.82E-06 |
| HEPACAM2   | 2.949270419  | -2.390970008 | 2.52E-06 | 6.82E-06 |
| FGF22      | 1.536163287  | -2.734567221 | 2.53E-06 | 6.85E-06 |
| AC022150.4 | 1.557381605  | -1.374208945 | 2.53E-06 | 6.86E-06 |
| QRFPR      | 2.137811321  | -2.753502566 | 2.55E-06 | 6.90E-06 |
| VGLL2      | 5.357835597  | -2.611768961 | 2.55E-06 | 6.92E-06 |
| HERC2P4    | 1.732472408  | -2.442023246 | 2.56E-06 | 6.94E-06 |
| ARG2       | 1.506560114  | 2.179743097  | 2.57E-06 | 6.95E-06 |
| SAMD11     | -1.155790626 | 1.09695777   | 2.58E-06 | 6.99E-06 |
| PMEL       | 1.978856109  | 4.682925993  | 2.58E-06 | 7.00E-06 |
| USP2-AS1   | 1.26293225   | 0.586930402  | 2.62E-06 | 7.09E-06 |
| GRIN3B     | 1.599216896  | -2.265100511 | 2.63E-06 | 7.11E-06 |
| SNHG28     | 1.2399375    | -2.578045885 | 2.64E-06 | 7.13E-06 |
| AP000757.2 | 2.934297524  | -1.769904317 | 2.64E-06 | 7.14E-06 |
| AC114488.1 | 1.875941357  | -2.448804317 | 2.64E-06 | 7.14E-06 |
| AC087273.1 | -1.011773384 | -2.347377443 | 2.65E-06 | 7.16E-06 |
| SLC38A5    | 1.403984578  | 0.921482259  | 2.67E-06 | 7.22E-06 |
| RSPO3      | -1.690549687 | 1.318106787  | 2.70E-06 | 7.29E-06 |
| LRP12      | 1.051715697  | 1.977749516  | 2.74E-06 | 7.40E-06 |
| SRSF12     | 1.138826779  | -0.026865574 | 2.74E-06 | 7.40E-06 |
| AC068756.1 | 3.089624688  | -2.852561119 | 2.75E-06 | 7.41E-06 |
| SLCO4C1    | -1.498407026 | 2.268862175  | 2.76E-06 | 7.44E-06 |
| PLEK2      | -1.189251274 | 3.403543954  | 2.77E-06 | 7.46E-06 |
| AC007114.2 | 1.438992042  | -2.623775152 | 2.79E-06 | 7.52E-06 |
| LINC02334  | 2.497419245  | -2.396554841 | 2.81E-06 | 7.56E-06 |
| GTF2IRD1P1 | 1.182228977  | -2.578308695 | 2.81E-06 | 7.57E-06 |

|              |              |              |          |          |
|--------------|--------------|--------------|----------|----------|
| SNORD99      | 1.090216933  | -2.57455138  | 2.84E-06 | 7.66E-06 |
| ELOVL4       | 1.573783013  | -1.074525987 | 2.87E-06 | 7.73E-06 |
| AP000851.2   | -1.813426896 | -0.64161535  | 2.90E-06 | 7.82E-06 |
| AC027117.2   | -1.048712373 | 2.172825364  | 2.90E-06 | 7.82E-06 |
| KAAG1        | 1.725454971  | -0.683562499 | 2.91E-06 | 7.84E-06 |
| SAMD12       | -1.158227014 | 1.395880724  | 2.91E-06 | 7.84E-06 |
| HCG17        | 1.048503727  | -2.159818028 | 2.93E-06 | 7.89E-06 |
| VNN3         | -1.041622668 | 4.032050788  | 2.94E-06 | 7.92E-06 |
| BMP8B        | 1.450207639  | 1.528936143  | 2.95E-06 | 7.93E-06 |
| CD70         | 1.656653334  | -1.326042981 | 2.96E-06 | 7.95E-06 |
| FAM241B      | 1.036311765  | 1.906801447  | 2.97E-06 | 7.98E-06 |
| NANOGP1      | 1.974708301  | -2.791852888 | 3.01E-06 | 8.09E-06 |
| NHLH2        | 4.155633011  | -3.03244945  | 3.02E-06 | 8.10E-06 |
| TMED3        | 1.202104226  | 4.940826601  | 3.02E-06 | 8.10E-06 |
| PICRAR       | 3.86898601   | -2.952236884 | 3.04E-06 | 8.16E-06 |
| SPDEF        | 2.777661967  | 1.080187029  | 3.04E-06 | 8.17E-06 |
| SLC16A11     | 1.47422053   | 4.487024333  | 3.05E-06 | 8.18E-06 |
| ACSBG1       | 1.825857323  | -1.471604542 | 3.07E-06 | 8.22E-06 |
| NOTUM        | 2.288712017  | 6.585480171  | 3.08E-06 | 8.27E-06 |
| AC136475.10  | 1.083164213  | -2.384153315 | 3.10E-06 | 8.31E-06 |
| AC244517.1   | 1.913446764  | -2.864591176 | 3.10E-06 | 8.32E-06 |
| IGHD         | -1.502532322 | 1.193794033  | 3.10E-06 | 8.32E-06 |
| KBTBD12      | 2.914649214  | -2.160039741 | 3.14E-06 | 8.40E-06 |
| HID1         | 1.051642079  | 3.701741342  | 3.15E-06 | 8.44E-06 |
| PPP1R1A      | -1.142656808 | 6.266344441  | 3.17E-06 | 8.50E-06 |
| AC092042.3   | -1.229410509 | -2.703287294 | 3.18E-06 | 8.51E-06 |
| AL356652.1   | 1.154230015  | -2.763222001 | 3.18E-06 | 8.52E-06 |
| RIPPLY2      | 3.903837203  | -2.685724617 | 3.20E-06 | 8.56E-06 |
| LILRA4       | -1.014596193 | -1.724645413 | 3.21E-06 | 8.58E-06 |
| FOLR1        | 2.150565386  | 0.305416726  | 3.21E-06 | 8.59E-06 |
| HTR2C        | 3.920254367  | -2.598716436 | 3.21E-06 | 8.60E-06 |
| AC007966.1   | 1.716716589  | -2.921082949 | 3.26E-06 | 8.72E-06 |
| SLC46A2      | 2.35096759   | -1.828025707 | 3.26E-06 | 8.73E-06 |
| AC073610.1   | 1.145643266  | -2.07037222  | 3.27E-06 | 8.73E-06 |
| RNF43        | 1.115176809  | 4.834605082  | 3.30E-06 | 8.81E-06 |
| LINC00322    | 2.823192331  | -3.339134068 | 3.30E-06 | 8.82E-06 |
| APELA        | 4.07666185   | -2.894206312 | 3.31E-06 | 8.83E-06 |
| IGHV3-72     | -1.591828911 | -0.99065799  | 3.32E-06 | 8.87E-06 |
| FKBP10       | 1.255110094  | 4.73010911   | 3.34E-06 | 8.90E-06 |
| TAS2R5       | 1.193581599  | -2.67877624  | 3.34E-06 | 8.90E-06 |
| GPA33        | -1.380951013 | -2.991561468 | 3.39E-06 | 9.04E-06 |
| FMO2         | -1.016354616 | 1.328667893  | 3.40E-06 | 9.05E-06 |
| SNORD17      | -1.030908882 | -2.039982893 | 3.43E-06 | 9.14E-06 |
| CDH7         | 3.438668447  | -2.447324175 | 3.44E-06 | 9.16E-06 |
| TNFSF9       | 1.385730418  | -0.389352985 | 3.48E-06 | 9.27E-06 |
| CCDC144NL-A' | 1.509852215  | 0.471733338  | 3.49E-06 | 9.28E-06 |
| PKIB         | 1.484353005  | 2.821694809  | 3.52E-06 | 9.36E-06 |
| LINC01518    | 3.983536363  | -3.047809701 | 3.52E-06 | 9.36E-06 |
| AC015961.2   | 1.246605002  | -2.975530902 | 3.52E-06 | 9.36E-06 |
| TAT          | -1.288080121 | 9.980467138  | 3.53E-06 | 9.39E-06 |
| DRAXIN       | 1.159825521  | -2.029602495 | 3.54E-06 | 9.41E-06 |
| CCDC74B      | 1.760715965  | -1.964730303 | 3.58E-06 | 9.51E-06 |
| AL365356.4   | 1.470238228  | -2.539895071 | 3.58E-06 | 9.52E-06 |
| LRCOL1       | -1.382689247 | 2.812438341  | 3.60E-06 | 9.56E-06 |
| CNTNAP3B     | 1.570452405  | 0.826310426  | 3.61E-06 | 9.58E-06 |
| ARHGAP28     | 1.286063449  | 0.346890639  | 3.62E-06 | 9.61E-06 |
| LRR38        | 4.579480867  | -2.403591019 | 3.62E-06 | 9.62E-06 |
| AC018467.1   | -1.038312586 | 0.889795333  | 3.63E-06 | 9.62E-06 |

|            |              |              |          |          |
|------------|--------------|--------------|----------|----------|
| ZNF468     | 1.02982471   | 2.788718911  | 3.63E-06 | 9.62E-06 |
| FCGBP      | 1.442756603  | 3.466883952  | 3.66E-06 | 9.69E-06 |
| CNGB1      | 2.589214528  | -0.962069647 | 3.68E-06 | 9.75E-06 |
| SMILR      | 1.892106444  | -2.344063879 | 3.71E-06 | 9.83E-06 |
| ITIH5      | 2.063074022  | 4.332568684  | 3.72E-06 | 9.86E-06 |
| KIAA1324   | 1.662653777  | 1.551869453  | 3.73E-06 | 9.88E-06 |
| JPH3       | 2.234068623  | -1.192087831 | 3.75E-06 | 9.92E-06 |
| CST4       | 4.369825548  | -2.425852912 | 3.79E-06 | 1.00E-05 |
| ZCCHC12    | 2.306592187  | -1.703351464 | 3.79E-06 | 1.00E-05 |
| AC027688.1 | 1.331808055  | -1.656870118 | 3.83E-06 | 1.01E-05 |
| AATK       | 1.303669997  | 1.499500464  | 3.83E-06 | 1.01E-05 |
| INSYN1     | 1.526024038  | -0.169678156 | 3.83E-06 | 1.01E-05 |
| Z82249.1   | 5.932323849  | -2.176011605 | 3.85E-06 | 1.02E-05 |
| UBXN10-AS1 | 1.492163438  | -1.792386749 | 3.86E-06 | 1.02E-05 |
| DLGAP1-AS5 | 6.003988315  | -0.039101111 | 3.91E-06 | 1.03E-05 |
| AC108676.1 | 1.453135105  | -1.668174443 | 3.91E-06 | 1.03E-05 |
| KRT85      | 2.636956479  | -0.865819988 | 3.97E-06 | 1.05E-05 |
| AC093627.7 | 1.455073148  | -2.7623054   | 4.01E-06 | 1.06E-05 |
| NLRP14     | -1.184314115 | -2.234231288 | 4.04E-06 | 1.07E-05 |
| BIRC7      | 2.333507827  | -0.58990958  | 4.05E-06 | 1.07E-05 |
| AC079062.1 | 3.427137991  | 1.004688717  | 4.07E-06 | 1.07E-05 |
| TTC9B      | 1.112807247  | -2.708340416 | 4.08E-06 | 1.08E-05 |
| KCNGB1     | 2.037342483  | -0.599217397 | 4.09E-06 | 1.08E-05 |
| FGF19      | 3.405279639  | 3.886884474  | 4.12E-06 | 1.09E-05 |
| AL626787.1 | -1.102003389 | -2.763065014 | 4.12E-06 | 1.09E-05 |
| AC025259.3 | -1.014833746 | -2.370558241 | 4.13E-06 | 1.09E-05 |
| AL161645.1 | -1.281551357 | -0.567601121 | 4.17E-06 | 1.10E-05 |
| C5orf38    | 3.608780986  | -2.837250823 | 4.20E-06 | 1.11E-05 |
| FZD2       | 1.197456116  | 0.12310036   | 4.21E-06 | 1.11E-05 |
| SGIP1      | 1.200367628  | 0.468965813  | 4.25E-06 | 1.12E-05 |
| GCCR       | -1.415398156 | 5.389297804  | 4.26E-06 | 1.12E-05 |
| LINC02363  | 1.022148765  | -0.447613097 | 4.29E-06 | 1.13E-05 |
| PTPRD-AS1  | -1.114753036 | -1.992100794 | 4.32E-06 | 1.14E-05 |
| SYT14      | 4.293840469  | -1.692547542 | 4.35E-06 | 1.14E-05 |
| FLJ16779   | 3.441874645  | -2.644957583 | 4.36E-06 | 1.14E-05 |
| EHF        | 1.468384012  | 2.730568299  | 4.36E-06 | 1.15E-05 |
| LYPD2      | -1.788503584 | -1.941960373 | 4.38E-06 | 1.15E-05 |
| SPATA17    | 1.725810036  | -1.098695136 | 4.39E-06 | 1.15E-05 |
| CXCL5      | 2.886574504  | 2.437910108  | 4.40E-06 | 1.15E-05 |
| MPP2       | 1.384135775  | -0.570112849 | 4.42E-06 | 1.16E-05 |
| AC007608.3 | 1.389710055  | -1.289025451 | 4.42E-06 | 1.16E-05 |
| HNRNPCL3   | 4.679571439  | -3.080301252 | 4.48E-06 | 1.18E-05 |
| AC091153.3 | 1.109159389  | -2.239672878 | 4.52E-06 | 1.19E-05 |
| AC020656.2 | 1.486991239  | 0.657232606  | 4.55E-06 | 1.19E-05 |
| SPATA18    | -1.122454443 | 2.261870997  | 4.56E-06 | 1.19E-05 |
| UBE2U      | 3.365349816  | -1.999378713 | 4.58E-06 | 1.20E-05 |
| DERL3      | 1.24608108   | 3.092302993  | 4.60E-06 | 1.21E-05 |
| MGAT4C     | 2.359919293  | 0.842916443  | 4.61E-06 | 1.21E-05 |
| GOLGA7B    | 1.775116994  | 1.863668952  | 4.62E-06 | 1.21E-05 |
| AC111149.2 | 1.930657775  | -0.801487548 | 4.67E-06 | 1.22E-05 |
| AL445309.1 | 1.061701074  | -2.445680672 | 4.71E-06 | 1.23E-05 |
| ZNF365     | 1.659778895  | -2.557838232 | 4.71E-06 | 1.23E-05 |
| IGLON5     | -1.170177981 | -0.148004018 | 4.80E-06 | 1.25E-05 |
| SOX9       | 1.243003973  | 4.913553083  | 4.82E-06 | 1.26E-05 |
| ZNF391     | 1.415211344  | -0.122397854 | 4.83E-06 | 1.26E-05 |
| AL139385.1 | -1.256858617 | 0.674629236  | 4.86E-06 | 1.27E-05 |
| LINC00514  | 1.023394637  | -0.35300631  | 4.87E-06 | 1.27E-05 |
| PTGDS      | 2.458128102  | 7.355264256  | 4.93E-06 | 1.29E-05 |



|            |              |              |          |          |
|------------|--------------|--------------|----------|----------|
| PARM1      | 1.117989516  | 2.666364254  | 4.95E-06 | 1.29E-05 |
| CYP3A4     | -1.665309358 | 10.44538623  | 5.00E-06 | 1.30E-05 |
| MXRA5      | -1.038280345 | 3.114419334  | 5.03E-06 | 1.31E-05 |
| VLDLR      | 1.56857166   | 2.848162204  | 5.03E-06 | 1.31E-05 |
| ELOVL7     | 1.696215267  | 3.000398126  | 5.08E-06 | 1.32E-05 |
| SULF1      | 1.371737259  | 3.906479548  | 5.11E-06 | 1.33E-05 |
| C2CD6      | 1.34743752   | -2.257943398 | 5.11E-06 | 1.33E-05 |
| ALOX15     | 1.519628903  | -1.672567366 | 5.16E-06 | 1.34E-05 |
| SLC26A3    | 2.24406273   | 1.591436468  | 5.16E-06 | 1.34E-05 |
| AC016924.1 | 1.08330659   | -0.89554603  | 5.17E-06 | 1.35E-05 |
| AC148476.1 | 2.389352123  | -1.957055765 | 5.20E-06 | 1.35E-05 |
| AC131532.1 | 2.904521899  | -2.866228366 | 5.21E-06 | 1.35E-05 |
| GLIS2      | 1.018912943  | 3.355149223  | 5.22E-06 | 1.36E-05 |
| AC025580.1 | 2.283254491  | -2.898741279 | 5.24E-06 | 1.36E-05 |
| UGT3A2     | 1.94961884   | 1.025365594  | 5.27E-06 | 1.37E-05 |
| SMIM24     | -1.581755116 | 4.024604368  | 5.31E-06 | 1.38E-05 |
| RHOV       | 2.323871637  | 0.603516045  | 5.31E-06 | 1.38E-05 |
| PRR5L      | 1.192743287  | 2.526094017  | 5.32E-06 | 1.38E-05 |
| AC073321.1 | -1.457207841 | -2.652864496 | 5.36E-06 | 1.39E-05 |
| SIK1       | -1.499472979 | 2.259201946  | 5.38E-06 | 1.40E-05 |
| NEURL3     | 1.401083417  | 2.312105158  | 5.41E-06 | 1.40E-05 |
| AC010624.1 | 1.10512907   | -2.766117397 | 5.44E-06 | 1.41E-05 |
| CRH        | 3.911733683  | -3.26498119  | 5.49E-06 | 1.42E-05 |
| AC008033.3 | 2.140230219  | -1.489898972 | 5.50E-06 | 1.42E-05 |
| STXBP5-AS1 | 1.119544454  | -1.253757499 | 5.55E-06 | 1.44E-05 |
| LEP        | 3.500000118  | -1.765101386 | 5.56E-06 | 1.44E-05 |
| FAAHP1     | 1.146528387  | -2.005648394 | 5.56E-06 | 1.44E-05 |
| AL160408.1 | 2.264555417  | -2.414645355 | 5.57E-06 | 1.44E-05 |
| DEFA5      | 6.209729061  | -2.189362471 | 5.62E-06 | 1.45E-05 |
| EGLN3      | 1.41960781   | 3.112621532  | 5.67E-06 | 1.47E-05 |
| FLJ31356   | 1.647957012  | -2.773460098 | 5.67E-06 | 1.47E-05 |
| CLLU1      | 3.976434161  | -2.4987313   | 5.68E-06 | 1.47E-05 |
| ALDH3B2    | 3.860564847  | -0.071924596 | 5.69E-06 | 1.47E-05 |
| MRPL23-AS1 | 2.599543     | -1.287669372 | 5.69E-06 | 1.47E-05 |
| PLCB4      | 1.129239603  | 0.110662388  | 5.70E-06 | 1.47E-05 |
| MEOX1      | 1.525842015  | -0.821650666 | 5.79E-06 | 1.49E-05 |
| CALCB      | 1.265929128  | -2.178750432 | 5.81E-06 | 1.50E-05 |
| CPS1       | -1.16101886  | 10.66375108  | 5.84E-06 | 1.51E-05 |
| FMR1-IT1   | 1.151778713  | -2.935232956 | 5.84E-06 | 1.51E-05 |
| CLDND2     | 1.02635826   | 1.012087172  | 5.85E-06 | 1.51E-05 |
| GJB6       | 3.058025622  | -0.611097023 | 5.96E-06 | 1.54E-05 |
| AC006213.6 | 1.026253     | -2.466853335 | 5.98E-06 | 1.54E-05 |
| THRSP      | -1.54381959  | 6.014570528  | 5.99E-06 | 1.54E-05 |
| CYP7A1     | 1.854384577  | 6.200435019  | 6.10E-06 | 1.57E-05 |
| SNAI2      | 1.084344183  | 3.457318361  | 6.12E-06 | 1.57E-05 |
| AC099066.2 | 1.573402861  | -1.953726991 | 6.13E-06 | 1.58E-05 |
| INSL6      | 3.589912152  | -2.294502825 | 6.16E-06 | 1.58E-05 |
| HTRA3      | 1.325653583  | 2.777611007  | 6.17E-06 | 1.58E-05 |
| TMEM59L    | 1.61570963   | -1.710279437 | 6.17E-06 | 1.59E-05 |
| LINC01029  | 4.632718738  | -3.286453754 | 6.18E-06 | 1.59E-05 |
| SERHL2     | 1.291082351  | 0.748403497  | 6.20E-06 | 1.59E-05 |
| IL21-AS1   | 2.736317504  | -2.566661278 | 6.25E-06 | 1.61E-05 |
| GLIS2-AS1  | 1.282411571  | -0.84116021  | 6.31E-06 | 1.62E-05 |
| ANKRD30A   | 2.709859112  | -3.172950121 | 6.31E-06 | 1.62E-05 |
| U62317.1   | 1.033161994  | -1.137468352 | 6.33E-06 | 1.62E-05 |
| PLXNB3     | 1.62698225   | 1.342130323  | 6.42E-06 | 1.64E-05 |
| ZNF285     | 1.067329898  | 0.193617829  | 6.44E-06 | 1.65E-05 |
| DCDC2      | 1.645147223  | 4.831039419  | 6.44E-06 | 1.65E-05 |

|            |              |              |          |          |
|------------|--------------|--------------|----------|----------|
| TRIM63     | 3.424293116  | -0.067443053 | 6.44E-06 | 1.65E-05 |
| LINC01124  | 1.252795588  | 2.69403849   | 6.47E-06 | 1.66E-05 |
| KIAA1257   | 1.338271125  | -1.854028908 | 6.55E-06 | 1.68E-05 |
| SNAP25     | 1.659756862  | 2.100064104  | 6.57E-06 | 1.68E-05 |
| PDPK2P     | 1.052680298  | -2.121976819 | 6.61E-06 | 1.69E-05 |
| POU6F2     | -1.701284282 | -0.981653573 | 6.63E-06 | 1.69E-05 |
| HK2        | 1.532947999  | 3.256547639  | 6.71E-06 | 1.72E-05 |
| GMCL2      | 2.905940369  | -2.646029303 | 6.72E-06 | 1.72E-05 |
| KRTAP5-7   | 2.080538989  | -2.835773571 | 6.72E-06 | 1.72E-05 |
| AC106897.1 | 1.071576389  | -2.538706157 | 6.78E-06 | 1.73E-05 |
| MAGEC3     | 3.824958107  | -2.405060996 | 6.79E-06 | 1.73E-05 |
| CHRM3      | 1.272596505  | 1.769309936  | 6.83E-06 | 1.74E-05 |
| TNR        | -1.64118527  | -0.138797243 | 6.87E-06 | 1.75E-05 |
| LINC00632  | 3.074936883  | -2.396911538 | 6.87E-06 | 1.75E-05 |
| LHX8       | 5.412313219  | -2.240392253 | 6.93E-06 | 1.77E-05 |
| KC877982.1 | 6.01012703   | -1.284682054 | 6.96E-06 | 1.78E-05 |
| PTCHD3P2   | 1.962080504  | -2.500891148 | 7.04E-06 | 1.79E-05 |
| RAMP1      | 1.091201906  | 6.517708601  | 7.07E-06 | 1.80E-05 |
| AC009414.2 | 1.247604947  | 0.007822824  | 7.10E-06 | 1.81E-05 |
| CRYBA4     | 3.268407304  | -1.582873499 | 7.10E-06 | 1.81E-05 |
| SEMA3A     | 1.474332733  | 0.185151742  | 7.25E-06 | 1.84E-05 |
| DOK7       | 1.382016595  | 1.441629777  | 7.26E-06 | 1.85E-05 |
| AC005537.1 | 2.763642089  | -2.592985384 | 7.32E-06 | 1.86E-05 |
| MSLN       | 2.307249631  | 0.643624892  | 7.33E-06 | 1.86E-05 |
| AL354872.2 | -1.008517528 | 2.355029251  | 7.36E-06 | 1.87E-05 |
| ASIC5      | 1.493698292  | -2.954019833 | 7.42E-06 | 1.88E-05 |
| LINC02228  | 3.149960631  | -2.73411491  | 7.42E-06 | 1.88E-05 |
| PRR15L     | 1.68562828   | 2.702432574  | 7.44E-06 | 1.89E-05 |
| PTHLH      | 2.012256795  | 1.469985982  | 7.50E-06 | 1.90E-05 |
| IL12A      | 1.133188576  | -2.042114203 | 7.51E-06 | 1.91E-05 |
| PPIAP21    | 1.089814493  | -2.649433681 | 7.52E-06 | 1.91E-05 |
| AL355303.1 | 1.08097664   | -2.366567384 | 7.55E-06 | 1.91E-05 |
| BOC        | 1.113557543  | 0.819285216  | 7.56E-06 | 1.92E-05 |
| CLUU1OS    | 3.807186489  | -2.037244237 | 7.63E-06 | 1.93E-05 |
| PLP1       | -1.869285678 | -2.320007888 | 7.65E-06 | 1.94E-05 |
| AC007731.2 | 1.114849743  | -2.173240842 | 7.65E-06 | 1.94E-05 |
| MST1R      | 1.573637645  | 1.391885094  | 7.73E-06 | 1.96E-05 |
| AC022034.1 | 1.916450808  | -1.179935187 | 7.75E-06 | 1.96E-05 |
| G6PC       | -1.01058215  | 9.133929274  | 7.78E-06 | 1.97E-05 |
| ULBP2      | 1.326464139  | -0.425264664 | 7.81E-06 | 1.98E-05 |
| LMTK3      | 1.661599747  | 1.058262354  | 7.82E-06 | 1.98E-05 |
| LGALS17A   | 2.22878132   | -1.984173076 | 7.85E-06 | 1.99E-05 |
| ACTL6B     | 1.356320605  | -2.442658391 | 7.92E-06 | 2.00E-05 |
| SCG3       | 2.26732976   | -1.707699817 | 7.99E-06 | 2.02E-05 |
| SDK1       | 1.558838638  | 1.869850854  | 8.04E-06 | 2.03E-05 |
| PYDC1      | 3.516438215  | -2.670248258 | 8.08E-06 | 2.04E-05 |
| CYP2A6     | -1.474501446 | 9.664367557  | 8.13E-06 | 2.05E-05 |
| HHIP-AS1   | -1.39322594  | -0.962914262 | 8.13E-06 | 2.05E-05 |
| AP003119.2 | 1.111856919  | -0.771144695 | 8.14E-06 | 2.05E-05 |
| CAPN13     | 2.676638556  | 0.387006142  | 8.14E-06 | 2.05E-05 |
| NDRG4      | 1.677794063  | 2.13148214   | 8.20E-06 | 2.07E-05 |
| FGF4       | 5.218898072  | -1.501261554 | 8.27E-06 | 2.08E-05 |
| NBL1       | 1.142641563  | 2.601863038  | 8.27E-06 | 2.08E-05 |
| LINC01508  | 3.881836639  | -1.883829359 | 8.31E-06 | 2.09E-05 |
| CNTD2      | 1.447228775  | 1.794924032  | 8.43E-06 | 2.12E-05 |
| LRRC52     | 2.860493743  | -2.448848576 | 8.55E-06 | 2.15E-05 |
| AC090578.1 | 3.61443963   | -2.599631271 | 8.60E-06 | 2.16E-05 |
| RFX3-AS1   | 1.026240811  | -1.7374283   | 8.69E-06 | 2.18E-05 |

|             |              |              |          |          |
|-------------|--------------|--------------|----------|----------|
| LINC00200   | 4.059433037  | -2.260792494 | 8.74E-06 | 2.19E-05 |
| C8orf37-AS1 | 1.29895053   | -2.655162588 | 8.75E-06 | 2.20E-05 |
| CATSPERB    | 1.658469561  | -0.688142838 | 8.76E-06 | 2.20E-05 |
| PRSS21      | 2.556012214  | -0.634263948 | 8.78E-06 | 2.20E-05 |
| NPTX2       | 2.3594083    | 3.432006555  | 8.83E-06 | 2.21E-05 |
| OVOL1-AS1   | 2.674363286  | -1.177810582 | 8.94E-06 | 2.24E-05 |
| ADIPOQ      | 4.392036253  | -2.290012896 | 8.95E-06 | 2.24E-05 |
| FSCN2       | 1.390583926  | -2.510411512 | 9.00E-06 | 2.26E-05 |
| LINC01831   | -1.434175369 | 1.13424124   | 9.10E-06 | 2.28E-05 |
| BX537318.2  | 3.045442282  | -3.035256833 | 9.11E-06 | 2.28E-05 |
| AC016722.2  | 1.001896261  | -2.506160029 | 9.11E-06 | 2.28E-05 |
| AC104046.1  | 1.107953868  | -2.684187625 | 9.15E-06 | 2.29E-05 |
| AC090971.3  | 1.066944276  | -2.580762653 | 9.16E-06 | 2.29E-05 |
| CYP1B1      | 1.461264183  | 4.896658679  | 9.29E-06 | 2.32E-05 |
| MAP3K15     | 1.551159014  | -1.442340026 | 9.31E-06 | 2.33E-05 |
| LGALS12     | 2.379629316  | -1.260967493 | 9.43E-06 | 2.36E-05 |
| AL121845.4  | 1.26084072   | -0.711758137 | 9.44E-06 | 2.36E-05 |
| AC026403.1  | 1.11686261   | 1.502419072  | 9.57E-06 | 2.39E-05 |
| SUN3        | 2.409869593  | -2.872727262 | 9.67E-06 | 2.41E-05 |
| GPR63       | 1.370152108  | -2.484866938 | 9.71E-06 | 2.42E-05 |
| PCDHGA4     | 1.445988948  | 0.188589133  | 9.92E-06 | 2.47E-05 |
| AC022784.1  | 1.201180765  | -0.468149576 | 1.03E-05 | 2.56E-05 |
| CALML3-AS1  | 1.440322259  | -1.001829169 | 1.03E-05 | 2.56E-05 |
| ST6GALNAC2  | 1.039769336  | 2.002602427  | 1.03E-05 | 2.56E-05 |
| HSPB8       | 1.423321777  | 4.033215648  | 1.03E-05 | 2.57E-05 |
| LRR3B       | 1.502089648  | -2.671048148 | 1.04E-05 | 2.58E-05 |
| AC026523.2  | 3.322499421  | -2.643006375 | 1.05E-05 | 2.60E-05 |
| AP001527.2  | 1.022411626  | -2.833061236 | 1.06E-05 | 2.63E-05 |
| LMOD1       | 1.238424665  | 3.502420563  | 1.06E-05 | 2.63E-05 |
| ANKRD34B    | 2.833083916  | -2.638616976 | 1.06E-05 | 2.63E-05 |
| RPL12P14    | 1.450922139  | 0.113866327  | 1.06E-05 | 2.64E-05 |
| AC140479.2  | 1.690544063  | -2.880146752 | 1.07E-05 | 2.64E-05 |
| AC016738.1  | 1.180889359  | -2.134932446 | 1.07E-05 | 2.65E-05 |
| AL357146.1  | 2.79299896   | -2.809861281 | 1.07E-05 | 2.66E-05 |
| SOX14       | 5.412017037  | -2.419377499 | 1.09E-05 | 2.70E-05 |
| PAK3        | 2.190300094  | 0.555561948  | 1.10E-05 | 2.72E-05 |
| GULP1       | 1.796889021  | 1.650995884  | 1.10E-05 | 2.73E-05 |
| PDE11A      | -1.030580877 | 2.738741418  | 1.11E-05 | 2.75E-05 |
| HOXD11      | 3.563925728  | -3.15888702  | 1.12E-05 | 2.76E-05 |
| AC132938.1  | 1.469955288  | -2.53309862  | 1.12E-05 | 2.78E-05 |
| MT1L        | -1.366602438 | 3.555590321  | 1.13E-05 | 2.80E-05 |
| AC068533.2  | -1.056833489 | -1.416308651 | 1.14E-05 | 2.83E-05 |
| SLC35F1     | 1.429090012  | -1.642023894 | 1.16E-05 | 2.86E-05 |
| SLC5A10     | 1.524620324  | 0.030127025  | 1.17E-05 | 2.90E-05 |
| AL713998.1  | 4.819500682  | -2.253105832 | 1.18E-05 | 2.92E-05 |
| VN1R81P     | 1.511332538  | -3.037186997 | 1.18E-05 | 2.92E-05 |
| TRABD2A     | 1.44805686   | 2.374510011  | 1.19E-05 | 2.94E-05 |
| TMEM54      | 1.045859871  | 3.580287945  | 1.20E-05 | 2.95E-05 |
| AL365295.1  | 1.153491995  | -2.067612684 | 1.20E-05 | 2.95E-05 |
| LINC01632   | 3.476414021  | -2.7376576   | 1.20E-05 | 2.96E-05 |
| CFAP65      | 1.306025453  | -2.115959953 | 1.20E-05 | 2.97E-05 |
| CCND2P1     | -1.144662407 | 2.883135615  | 1.20E-05 | 2.97E-05 |
| RDH10-AS1   | 1.068640537  | -1.983607535 | 1.21E-05 | 2.97E-05 |
| LOXL1       | 1.364722347  | 2.583357092  | 1.21E-05 | 2.99E-05 |
| GRM8        | -1.477578821 | 0.333326228  | 1.23E-05 | 3.02E-05 |
| CRTAC1      | 2.793873851  | 1.720247228  | 1.24E-05 | 3.05E-05 |
| LINC02212   | 4.259725645  | -2.131490431 | 1.25E-05 | 3.06E-05 |
| AC136621.1  | 3.796074582  | -0.037604775 | 1.25E-05 | 3.07E-05 |

|            |              |              |          |          |
|------------|--------------|--------------|----------|----------|
| PCDHB6     | 1.357902405  | -1.05193514  | 1.26E-05 | 3.09E-05 |
| AC025164.1 | 1.053009002  | -1.442022898 | 1.27E-05 | 3.11E-05 |
| AL356056.2 | 1.177755723  | -1.699297288 | 1.27E-05 | 3.12E-05 |
| CRHR1      | 4.513305346  | -2.771464691 | 1.27E-05 | 3.13E-05 |
| CHRM1      | 3.292190155  | -2.021818716 | 1.28E-05 | 3.13E-05 |
| TUBA4B     | 1.409610645  | -0.373499344 | 1.28E-05 | 3.13E-05 |
| DMKN       | 2.031250084  | 3.206491484  | 1.28E-05 | 3.14E-05 |
| KIF5C      | 1.399091913  | 0.793777865  | 1.29E-05 | 3.16E-05 |
| XG         | -1.24635497  | -0.151538788 | 1.29E-05 | 3.16E-05 |
| ITGAD      | -1.076479072 | 0.722373286  | 1.29E-05 | 3.17E-05 |
| PPIAP39    | 1.65254933   | -2.658391771 | 1.31E-05 | 3.21E-05 |
| MYO7B      | 1.339406669  | 2.555652382  | 1.31E-05 | 3.22E-05 |
| AL627309.7 | 1.185868245  | -1.807415236 | 1.32E-05 | 3.24E-05 |
| AC009646.2 | 5.782525052  | -1.805972012 | 1.33E-05 | 3.25E-05 |
| SULT2B1    | 1.97294961   | 0.299981876  | 1.35E-05 | 3.29E-05 |
| AL022341.1 | 1.015999842  | -2.836655659 | 1.35E-05 | 3.30E-05 |
| LINC02562  | 2.735609242  | -2.417872594 | 1.35E-05 | 3.31E-05 |
| SLC16A14   | 1.649851021  | 3.250000431  | 1.36E-05 | 3.31E-05 |
| SRGAP2D    | 1.383769462  | -2.535667004 | 1.36E-05 | 3.31E-05 |
| DDR1       | 1.173896244  | 5.119316499  | 1.36E-05 | 3.32E-05 |
| KSR2       | 1.664738629  | -1.571589469 | 1.36E-05 | 3.33E-05 |
| PSAPL1     | 3.047167685  | -2.086052327 | 1.37E-05 | 3.33E-05 |
| SLC2A1     | 1.109084305  | 3.255224336  | 1.37E-05 | 3.35E-05 |
| EPHA5      | 3.873199891  | -2.445488127 | 1.38E-05 | 3.36E-05 |
| AC117402.1 | 1.402135569  | -2.137294132 | 1.39E-05 | 3.38E-05 |
| C16orf74   | 1.096496616  | -0.31132377  | 1.39E-05 | 3.38E-05 |
| TNFSF11    | -1.142742438 | 0.444313947  | 1.39E-05 | 3.39E-05 |
| TMEM191B   | 1.387131213  | -2.41748687  | 1.40E-05 | 3.41E-05 |
| PLD5       | 2.46223022   | -0.117484464 | 1.40E-05 | 3.41E-05 |
| FABP1      | -1.050712404 | 10.3282613   | 1.42E-05 | 3.45E-05 |
| SCN1A      | 2.877579266  | -1.666298673 | 1.43E-05 | 3.47E-05 |
| CCDC36     | 1.28902678   | -2.37430643  | 1.44E-05 | 3.49E-05 |
| BMP8A      | 1.014143769  | -2.1485978   | 1.46E-05 | 3.55E-05 |
| NEGR1      | -1.102635427 | -1.696943499 | 1.47E-05 | 3.58E-05 |
| ANGPTL7    | 4.044229567  | 0.201274855  | 1.48E-05 | 3.59E-05 |
| CPA4       | 1.837152625  | -1.510476621 | 1.49E-05 | 3.62E-05 |
| AC009093.1 | 1.073139089  | -2.799081759 | 1.51E-05 | 3.65E-05 |
| TMEM130    | 2.194597482  | 0.513365626  | 1.51E-05 | 3.66E-05 |
| GAL        | 2.934001794  | -1.054724857 | 1.51E-05 | 3.67E-05 |
| ADGRG2     | 1.604707043  | 2.440169834  | 1.52E-05 | 3.69E-05 |
| CTSE       | 2.733536768  | 1.631560714  | 1.52E-05 | 3.69E-05 |
| C7orf61    | 1.254039352  | -2.324856447 | 1.53E-05 | 3.71E-05 |
| OLFM4      | 4.022824965  | 2.24608776   | 1.54E-05 | 3.72E-05 |
| SCTR       | 1.956840129  | 2.622407285  | 1.54E-05 | 3.73E-05 |
| SLC9C2     | 1.861991898  | -1.752958032 | 1.54E-05 | 3.73E-05 |
| ADORA1     | 1.551397349  | 1.459358846  | 1.54E-05 | 3.74E-05 |
| SYCP2L     | 1.239819912  | -2.378610267 | 1.54E-05 | 3.74E-05 |
| AC134878.2 | 1.190747769  | -1.954342944 | 1.57E-05 | 3.79E-05 |
| SLCO5A1    | 1.411869773  | -1.017943844 | 1.57E-05 | 3.80E-05 |
| AC005357.2 | -2.10852091  | -2.434806609 | 1.58E-05 | 3.82E-05 |
| AL354719.2 | 1.418364701  | 0.422933168  | 1.58E-05 | 3.83E-05 |
| CAMK2A     | 1.92516057   | -0.342889545 | 1.60E-05 | 3.86E-05 |
| AC010907.2 | 2.106601821  | -2.745942023 | 1.61E-05 | 3.88E-05 |
| AC073365.1 | 4.174970617  | -2.949776291 | 1.62E-05 | 3.90E-05 |
| TRIM67     | 1.243370731  | -1.154672306 | 1.62E-05 | 3.92E-05 |
| DNAH6      | -1.074786103 | 1.878968757  | 1.63E-05 | 3.93E-05 |
| Z97056.1   | 1.5508267    | 0.397946815  | 1.63E-05 | 3.93E-05 |
| AC243830.2 | 1.086398315  | -2.752067548 | 1.64E-05 | 3.96E-05 |

|            |              |              |          |          |
|------------|--------------|--------------|----------|----------|
| ITGA3      | 1.196673669  | 4.200882613  | 1.66E-05 | 3.99E-05 |
| TREML4     | 2.619199228  | -2.715161977 | 1.66E-05 | 4.00E-05 |
| LHFPL3-AS2 | 2.355640196  | -0.210097304 | 1.67E-05 | 4.01E-05 |
| SERPINB4   | 5.025491284  | -1.483926661 | 1.67E-05 | 4.03E-05 |
| AL035661.1 | -1.224817946 | 1.747938582  | 1.68E-05 | 4.04E-05 |
| GSTM5      | -1.280862307 | 0.620423955  | 1.69E-05 | 4.07E-05 |
| SMYD1      | 3.155251912  | -1.954891349 | 1.70E-05 | 4.09E-05 |
| AC015849.5 | 1.24998959   | -0.653984625 | 1.70E-05 | 4.10E-05 |
| CTNND2     | 2.403809817  | 3.040429419  | 1.71E-05 | 4.10E-05 |
| CHST8      | 2.418196083  | -0.032918564 | 1.71E-05 | 4.10E-05 |
| RIC3       | -1.284584005 | -0.23302768  | 1.71E-05 | 4.12E-05 |
| AL137802.2 | 1.20551223   | -2.93305166  | 1.73E-05 | 4.16E-05 |
| IHH        | 1.22026987   | 2.503141142  | 1.75E-05 | 4.19E-05 |
| AC010487.1 | 1.426024316  | -1.068183081 | 1.76E-05 | 4.23E-05 |
| LINC02449  | 1.008604554  | -2.660815411 | 1.77E-05 | 4.24E-05 |
| PDCD1      | 1.461448932  | 1.099759192  | 1.77E-05 | 4.24E-05 |
| LECT2      | -1.136661338 | 6.474212089  | 1.78E-05 | 4.26E-05 |
| ZNF813     | 1.024945704  | 1.713583402  | 1.78E-05 | 4.27E-05 |
| CAMK1G     | 1.816110867  | -0.251206463 | 1.78E-05 | 4.27E-05 |
| ZNF790-AS1 | 1.00419574   | -1.000653301 | 1.79E-05 | 4.29E-05 |
| AC097063.1 | -1.214607368 | -2.598714486 | 1.80E-05 | 4.32E-05 |
| AL928921.1 | 1.279075419  | -0.026703448 | 1.81E-05 | 4.34E-05 |
| ADGRB1     | 1.485548862  | -0.352866134 | 1.82E-05 | 4.36E-05 |
| NOVA1      | 1.432293259  | 1.046641997  | 1.82E-05 | 4.36E-05 |
| CELF5      | 1.774895128  | 0.591412111  | 1.86E-05 | 4.44E-05 |
| ACSL6      | 1.385814114  | 3.746157622  | 1.86E-05 | 4.45E-05 |
| AC145138.1 | 1.002652922  | -2.345202919 | 1.87E-05 | 4.48E-05 |
| INSM1      | 3.154231562  | -2.565448474 | 1.89E-05 | 4.52E-05 |
| DKK3       | 1.164525237  | 4.75181985   | 1.90E-05 | 4.53E-05 |
| CLDN6      | 2.023390127  | -1.518218295 | 1.90E-05 | 4.55E-05 |
| SLC1A7     | 1.823820935  | 3.135207437  | 1.91E-05 | 4.55E-05 |
| C4orf54    | 2.058094436  | -2.334385533 | 1.91E-05 | 4.56E-05 |
| PTPRD      | -1.04556051  | 3.007393242  | 1.92E-05 | 4.59E-05 |
| PAPLN      | 1.311359553  | 3.589257917  | 1.94E-05 | 4.62E-05 |
| ITPR3      | 1.312149115  | 3.401739183  | 1.94E-05 | 4.62E-05 |
| CELF4      | 1.466879138  | -1.535925795 | 1.94E-05 | 4.63E-05 |
| AC007938.3 | 1.229731454  | -1.774080657 | 1.95E-05 | 4.65E-05 |
| LINC01550  | -1.07630648  | -1.84678762  | 1.99E-05 | 4.73E-05 |
| SIX3       | 3.1804313    | -2.915167311 | 1.99E-05 | 4.73E-05 |
| IGKV2-24   | -1.526382456 | 0.005571616  | 2.00E-05 | 4.75E-05 |
| AP000808.1 | 1.759113416  | 1.494869792  | 2.05E-05 | 4.87E-05 |
| SPRY4-AS1  | 1.404628221  | -2.935843967 | 2.11E-05 | 5.01E-05 |
| OXT        | -1.647587936 | 0.499077848  | 2.11E-05 | 5.01E-05 |
| RHCG       | 1.888388475  | 1.486892721  | 2.12E-05 | 5.01E-05 |
| KCNJ4      | 1.519850001  | 1.791950506  | 2.12E-05 | 5.02E-05 |
| FAXC       | 1.923896371  | -1.597888522 | 2.12E-05 | 5.02E-05 |
| SELE       | -1.064180077 | 1.562954225  | 2.12E-05 | 5.03E-05 |
| KLC3       | 1.817672833  | -0.535190707 | 2.13E-05 | 5.04E-05 |
| AC009041.2 | 1.070864421  | -1.044253268 | 2.13E-05 | 5.05E-05 |
| UGT8       | 2.217263212  | -0.855456579 | 2.13E-05 | 5.05E-05 |
| AC108868.1 | 3.944180591  | -2.863188052 | 2.16E-05 | 5.11E-05 |
| AC096711.3 | 2.094682529  | -2.749068143 | 2.21E-05 | 5.22E-05 |
| ST8SIA5    | 1.222770522  | -2.358286379 | 2.21E-05 | 5.22E-05 |
| CADPS      | 2.439815958  | 0.270020841  | 2.23E-05 | 5.26E-05 |
| TMEM35A    | 1.783292888  | -2.563267889 | 2.23E-05 | 5.28E-05 |
| BTNL3      | 3.342333424  | -0.103480571 | 2.24E-05 | 5.29E-05 |
| CFAP45     | 1.144780688  | -1.246866513 | 2.24E-05 | 5.30E-05 |
| BLACAT1    | 2.459697662  | -3.00764122  | 2.25E-05 | 5.32E-05 |

|            |              |              |          |          |
|------------|--------------|--------------|----------|----------|
| DUXA       | 4.460892945  | -3.110355575 | 2.27E-05 | 5.37E-05 |
| AL109659.2 | 1.005250736  | -2.808158713 | 2.31E-05 | 5.46E-05 |
| INTS4P1    | 1.111624211  | -2.309366183 | 2.36E-05 | 5.55E-05 |
| AC015802.5 | 1.044833879  | -2.857603869 | 2.36E-05 | 5.55E-05 |
| LINC01510  | 2.218947373  | -2.683460787 | 2.37E-05 | 5.59E-05 |
| ARHGAP36   | 5.589467007  | 0.511659158  | 2.38E-05 | 5.60E-05 |
| AL049794.1 | 1.036094805  | -2.748336202 | 2.39E-05 | 5.62E-05 |
| AC008554.1 | 2.171663084  | -2.785932417 | 2.39E-05 | 5.62E-05 |
| AC106795.2 | -1.210726264 | -0.751227413 | 2.39E-05 | 5.62E-05 |
| AC007495.1 | -1.309809922 | -1.719864205 | 2.41E-05 | 5.66E-05 |
| MYH1       | 2.795226546  | -1.912779633 | 2.41E-05 | 5.66E-05 |
| S100A6     | 1.113863236  | 6.230112936  | 2.43E-05 | 5.72E-05 |
| ARHGEF38   | 1.437325282  | -0.014682142 | 2.44E-05 | 5.73E-05 |
| PNLIP      | 4.704107186  | -3.018840972 | 2.49E-05 | 5.84E-05 |
| COL11A2    | 1.635293353  | 1.462001044  | 2.49E-05 | 5.85E-05 |
| TWIST2     | 2.046314466  | 0.265071152  | 2.49E-05 | 5.85E-05 |
| REG4       | 1.933241096  | -0.149728558 | 2.50E-05 | 5.86E-05 |
| ATP1A4     | 1.765173314  | -2.684951211 | 2.50E-05 | 5.86E-05 |
| KLK1       | 2.038345698  | -2.761023336 | 2.50E-05 | 5.87E-05 |
| FGF8       | 3.587376891  | -2.5030628   | 2.50E-05 | 5.87E-05 |
| MEG3       | 1.684168849  | 4.91971962   | 2.52E-05 | 5.90E-05 |
| AL033397.2 | 1.085014837  | -1.74520114  | 2.53E-05 | 5.93E-05 |
| LCTL       | 1.087608964  | -2.104468025 | 2.56E-05 | 6.00E-05 |
| HMG2P15    | 1.182721386  | -1.383243964 | 2.58E-05 | 6.05E-05 |
| ZNF454     | 1.198320808  | -2.048852939 | 2.60E-05 | 6.08E-05 |
| SNAP91     | 3.041826009  | -2.609747723 | 2.64E-05 | 6.17E-05 |
| PRDM16     | 1.387077988  | 0.847513938  | 2.66E-05 | 6.21E-05 |
| TDRD12     | 1.188514626  | -2.808884483 | 2.67E-05 | 6.23E-05 |
| CLGN       | 1.344927832  | 3.494557266  | 2.69E-05 | 6.29E-05 |
| AC112206.3 | 1.964824824  | -1.421796173 | 2.74E-05 | 6.39E-05 |
| LINC02315  | 2.371359608  | -1.240421745 | 2.75E-05 | 6.42E-05 |
| AC087273.2 | 1.813202962  | -1.786389805 | 2.79E-05 | 6.50E-05 |
| AC099552.4 | 2.042809169  | -2.014151385 | 2.79E-05 | 6.50E-05 |
| AC092645.1 | 1.074743809  | -0.126642566 | 2.83E-05 | 6.58E-05 |
| LINC01914  | 1.626486404  | -2.425727268 | 2.85E-05 | 6.64E-05 |
| ANGPTL1    | -1.105727063 | 2.97443441   | 2.87E-05 | 6.67E-05 |
| FAM183A    | 2.086927047  | -1.818307697 | 2.87E-05 | 6.68E-05 |
| AC004687.1 | 1.129665762  | -0.134823824 | 2.90E-05 | 6.74E-05 |
| LGR5       | 2.155723444  | 3.369879072  | 2.93E-05 | 6.81E-05 |
| GDF6       | -1.116989952 | -1.388501541 | 2.94E-05 | 6.84E-05 |
| AC104971.3 | 2.475352904  | -2.585206639 | 2.95E-05 | 6.85E-05 |
| SALL4      | 1.640474332  | 0.57777185   | 2.96E-05 | 6.86E-05 |
| ZNF98      | 2.342426422  | -2.676256524 | 2.96E-05 | 6.87E-05 |
| SYT15      | 1.141063668  | -1.277574704 | 2.97E-05 | 6.90E-05 |
| AL590326.1 | 1.040339994  | -2.039101305 | 2.99E-05 | 6.93E-05 |
| CHRNA1     | 2.420109837  | -0.738302005 | 3.05E-05 | 7.08E-05 |
| LINC01579  | 2.75821737   | -3.121515662 | 3.06E-05 | 7.08E-05 |
| PNPLA5     | -1.728053562 | -2.498898955 | 3.08E-05 | 7.14E-05 |
| JSRP1      | 1.187483716  | -0.416641583 | 3.09E-05 | 7.16E-05 |
| GRIN2D     | 1.016365417  | 0.216782658  | 3.10E-05 | 7.19E-05 |
| C1QTNF9B   | 2.00648808   | -2.880935921 | 3.11E-05 | 7.19E-05 |
| SMCO2      | 1.20745772   | -2.330690789 | 3.11E-05 | 7.20E-05 |
| AC112206.4 | 1.757138568  | -2.581742884 | 3.12E-05 | 7.22E-05 |
| SLC6A11    | 2.439038915  | 3.325398184  | 3.16E-05 | 7.32E-05 |
| NTNG2      | 1.17517015   | -0.769893905 | 3.17E-05 | 7.34E-05 |
| LINC00982  | 1.53179336   | -0.188412211 | 3.18E-05 | 7.36E-05 |
| PODN       | -1.023911496 | 3.247670836  | 3.19E-05 | 7.38E-05 |
| FGD5P1     | 2.348366887  | -3.040513986 | 3.23E-05 | 7.45E-05 |

|            |              |              |          |             |
|------------|--------------|--------------|----------|-------------|
| LINC02054  | 3.139724024  | -2.43097346  | 3.25E-05 | 7.51E-05    |
| HBE1       | 2.970552094  | -1.854303571 | 3.28E-05 | 7.57E-05    |
| AC027288.3 | 1.596674358  | -2.527018384 | 3.31E-05 | 7.63E-05    |
| AC009549.1 | 1.07825537   | -1.086616871 | 3.35E-05 | 7.73E-05    |
| RAMP2-AS1  | 1.152414784  | -0.064903744 | 3.37E-05 | 7.77E-05    |
| MGP        | 1.028810785  | 5.161683143  | 3.42E-05 | 7.87E-05    |
| MIR181A2HG | 1.215419046  | -2.592533268 | 3.42E-05 | 7.87E-05    |
| AC116025.1 | -1.116943683 | -1.427598661 | 3.46E-05 | 7.96E-05    |
| MDGA2      | 2.823985565  | -0.746742302 | 3.47E-05 | 7.97E-05    |
| EFCAB12    | 1.147281464  | 2.108340413  | 3.48E-05 | 8.00E-05    |
| LAMB3      | 1.073863177  | 4.714166182  | 3.51E-05 | 8.06E-05    |
| S100A8     | -1.122482386 | 2.455759115  | 3.52E-05 | 8.09E-05    |
| SERPINE2   | 1.179015018  | 4.470751476  | 3.60E-05 | 8.26E-05    |
| DDX11L2    | 1.04308765   | -0.879798344 | 3.63E-05 | 8.32E-05    |
| ADGRA1     | -1.750837735 | -2.027327599 | 3.63E-05 | 8.33E-05    |
| NECTIN4    | 1.685739804  | 0.232463278  | 3.64E-05 | 8.35E-05    |
| SBK1       | 1.096426771  | 0.561721776  | 3.65E-05 | 8.37E-05    |
| ANKRD2     | 1.406794603  | -1.609033252 | 3.67E-05 | 8.40E-05    |
| CYP4F32P   | 3.597816278  | -2.43555959  | 3.71E-05 | 8.49E-05    |
| AL353747.3 | 2.445250053  | -2.87721985  | 3.71E-05 | 8.50E-05    |
| MAPK15     | 1.755858479  | -0.339182496 | 3.73E-05 | 8.53E-05    |
| CITED1     | 1.293193792  | -2.013405393 | 3.78E-05 | 8.65E-05    |
| TGFB2      | 1.178340533  | 1.83018718   | 3.82E-05 | 8.74E-05    |
| CLIC6      | -1.354790202 | 1.152976029  | 3.83E-05 | 8.75E-05    |
| OBSCN-AS1  | 1.27040812   | -1.886714465 | 3.83E-05 | 8.76E-05    |
| MCHR1      | 1.218252497  | 2.002698114  | 3.91E-05 | 8.92E-05    |
| FOXP2      | -1.22910463  | 1.518871598  | 3.91E-05 | 8.92E-05    |
| AL451069.1 | 2.063743884  | -2.750109596 | 3.91E-05 | 8.93E-05    |
| CDH18      | 3.259954909  | -2.464327455 | 3.94E-05 | 8.99E-05    |
| CARNS1     | 1.17006818   | 1.034667376  | 3.95E-05 | 8.99E-05    |
| SLC6A2     | 3.232372605  | 3.130003312  | 4.00E-05 | 9.12E-05    |
| RHEX       | 1.618886292  | 1.797315952  | 4.01E-05 | 9.13E-05    |
| AC132807.2 | 2.546238608  | -2.88204269  | 4.01E-05 | 9.13E-05    |
| PSMA8      | 2.835390751  | -2.961007875 | 4.02E-05 | 9.15E-05    |
| AC079305.1 | 1.188366587  | -1.925944482 | 4.04E-05 | 9.19E-05    |
| AC073349.2 | 1.304413538  | -2.734326326 | 4.06E-05 | 9.24E-05    |
| SLC16A9    | 1.911844395  | 2.624659032  | 4.06E-05 | 9.25E-05    |
| AC016395.1 | -1.007780055 | -1.700179313 | 4.07E-05 | 9.25E-05    |
| IRGM       | 1.825483715  | -2.742653564 | 4.07E-05 | 9.27E-05    |
| UTS2       | 1.801851441  | -1.470175717 | 4.09E-05 | 9.29E-05    |
| SNAP25-AS1 | 1.344296067  | 1.014388393  | 4.11E-05 | 9.33E-05    |
| WT1-AS     | 2.432154745  | -1.884985152 | 4.19E-05 | 9.51E-05    |
| IGFBPL1    | 1.98529911   | -1.024958762 | 4.21E-05 | 9.55E-05    |
| TNFAIP6    | 1.645554026  | -0.567893202 | 4.22E-05 | 9.56E-05    |
| MYT1       | 1.403996553  | -1.295078077 | 4.23E-05 | 9.60E-05    |
| XCR1       | -1.05661093  | -0.637346164 | 4.24E-05 | 9.61E-05    |
| LARGE2     | 1.240867205  | 2.720846622  | 4.26E-05 | 9.65E-05    |
| NCCRP1     | 1.844681682  | -1.279738907 | 4.30E-05 | 9.74E-05    |
| AC156455.1 | 1.15636528   | -0.960407504 | 4.32E-05 | 9.79E-05    |
| CDH17      | 2.594199709  | 0.928195171  | 4.33E-05 | 9.79E-05    |
| SMIM22     | 2.121888742  | 0.64618742   | 4.34E-05 | 9.82E-05    |
| CKM        | 1.485588477  | -2.634078181 | 4.42E-05 | 9.99E-05    |
| KCNC2      | 2.856154589  | -0.272719711 | 4.42E-05 | 9.99E-05    |
| OR51B5     | 2.297158663  | -2.60611386  | 4.48E-05 | 0.000101153 |
| CALCR      | 1.969233896  | -1.942271196 | 4.48E-05 | 0.000101291 |
| MOGAT3     | 1.035103882  | 4.44857409   | 4.51E-05 | 0.000101781 |
| CLEC18B    | 1.062944323  | -2.548896228 | 4.54E-05 | 0.000102459 |
| OLAH       | 1.850754601  | -2.795024197 | 4.55E-05 | 0.000102828 |

|            |              |              |          |             |
|------------|--------------|--------------|----------|-------------|
| MIR3681HG  | 1.696218044  | -2.472413394 | 4.65E-05 | 0.000104732 |
| TMEM63C    | 1.701067871  | -0.374383204 | 4.67E-05 | 0.000105253 |
| AP000688.2 | 2.438718674  | -2.641963736 | 4.75E-05 | 0.000107013 |
| PCDHA3     | 1.975563328  | -1.8680227   | 4.77E-05 | 0.000107266 |
| TNFRSF11B  | -1.009108652 | 3.008629816  | 4.80E-05 | 0.000107959 |
| BPIFB1     | 2.582822927  | -0.691089623 | 4.84E-05 | 0.000108924 |
| SPTSSB     | 1.806440505  | 0.371788623  | 4.85E-05 | 0.000109143 |
| EMID1      | 1.078602427  | 3.485936145  | 4.87E-05 | 0.000109519 |
| RPS3AP54   | 1.01749972   | -2.936434347 | 4.96E-05 | 0.00011131  |
| RASAL1     | 1.614031254  | 0.4541569    | 4.98E-05 | 0.000111778 |
| PPIAP46    | 1.205060369  | -2.500670432 | 5.01E-05 | 0.000112436 |
| LINC02269  | 4.007630033  | -2.984366129 | 5.02E-05 | 0.000112644 |
| SLC38A1    | 1.002571701  | 5.073077264  | 5.02E-05 | 0.00011272  |
| U91319.1   | -1.189879237 | 0.697777768  | 5.04E-05 | 0.00011317  |
| NNAT       | 1.081924677  | -2.042312799 | 5.07E-05 | 0.000113678 |
| NOX5       | 1.335328604  | -2.5885767   | 5.08E-05 | 0.000113909 |
| SNURF      | 1.006196621  | -2.535172049 | 5.10E-05 | 0.000114165 |
| MT1A       | -1.188350031 | 4.008286497  | 5.14E-05 | 0.000115191 |
| FOXO6      | 1.539211333  | 0.008443228  | 5.16E-05 | 0.00011555  |
| OTOGL      | 1.476188042  | -2.865618135 | 5.17E-05 | 0.000115691 |
| NKX2-3     | 1.83726874   | -2.605086081 | 5.17E-05 | 0.000115709 |
| FRAS1      | 1.710910265  | 3.080537064  | 5.19E-05 | 0.00011612  |
| TGFB2-AS1  | 1.512905936  | -2.523218527 | 5.20E-05 | 0.000116421 |
| RHOXF1-AS1 | 1.381247097  | -1.135671555 | 5.23E-05 | 0.000117026 |
| ZNF711     | 1.267775633  | 0.772791993  | 5.24E-05 | 0.00011719  |
| TNXA       | 1.005923154  | 0.997967472  | 5.25E-05 | 0.000117376 |
| WTAPP1     | 1.760480984  | -2.600087327 | 5.29E-05 | 0.000118278 |
| APOD       | 1.148509098  | 1.089197966  | 5.32E-05 | 0.000118825 |
| FHL5       | 1.278297222  | -1.060416308 | 5.32E-05 | 0.00011885  |
| CD1A       | 1.675771623  | -1.752113874 | 5.34E-05 | 0.000119226 |
| AP000345.2 | 1.124930338  | -2.272821191 | 5.34E-05 | 0.000119237 |
| AC008514.1 | 1.797525419  | -3.009897186 | 5.39E-05 | 0.000120296 |
| AC237221.1 | 1.809313806  | 0.056699323  | 5.41E-05 | 0.000120848 |
| OVOL1      | 2.026995709  | -0.046059873 | 5.42E-05 | 0.000120931 |
| AC093720.1 | 1.721351543  | -0.418369542 | 5.45E-05 | 0.000121578 |
| SEC14L5    | 1.13086832   | -1.087922182 | 5.47E-05 | 0.000122007 |
| PCDHB16    | 1.185622982  | 1.099112925  | 5.51E-05 | 0.000122866 |
| APOA4      | 2.646833921  | 8.601014726  | 5.58E-05 | 0.00012436  |
| LINC01978  | 1.272082679  | -2.241310466 | 5.83E-05 | 0.000129579 |
| AC079145.1 | 1.088243287  | -2.964126607 | 5.86E-05 | 0.000130031 |
| RGS13      | 1.910695902  | -1.782253574 | 5.90E-05 | 0.000130932 |
| AL627309.6 | 1.086400427  | -0.492449497 | 5.93E-05 | 0.000131706 |
| NPY5R      | -1.252868246 | -1.805840175 | 5.94E-05 | 0.0001318   |
| CLIC3      | 1.269415853  | 0.283575814  | 5.94E-05 | 0.000131806 |
| AQP7P2     | -1.201052135 | -2.423608912 | 5.95E-05 | 0.000132128 |
| SIM1       | 2.171577536  | 0.530073033  | 5.96E-05 | 0.000132293 |
| PCDHB9     | 1.210441488  | -0.878863904 | 5.97E-05 | 0.000132435 |
| KCNT1      | 1.173376273  | -2.526407912 | 6.03E-05 | 0.000133567 |
| PCDHA4     | 1.70402399   | -2.437720737 | 6.07E-05 | 0.000134373 |
| LINC01807  | 2.155309659  | -2.381210375 | 6.07E-05 | 0.000134378 |
| ALLC       | -1.218354132 | -1.700401527 | 6.10E-05 | 0.000135074 |
| AC139749.1 | 2.219240978  | -0.309241455 | 6.12E-05 | 0.000135455 |
| LTF        | 1.407490328  | 1.767454856  | 6.18E-05 | 0.00013674  |
| ST6GALNAC1 | -1.040794186 | -1.590234291 | 6.26E-05 | 0.000138363 |
| C9orf84    | 1.247191829  | -2.537065253 | 6.28E-05 | 0.000138784 |
| TRPM3      | 1.417444937  | 0.084738444  | 6.30E-05 | 0.000139181 |
| NRK        | -1.098310508 | -1.597887347 | 6.33E-05 | 0.00013985  |
| LINC01249  | 3.51753509   | -3.18059863  | 6.35E-05 | 0.000140182 |



|            |              |              |          |             |
|------------|--------------|--------------|----------|-------------|
| HLA-DOB    | 1.123594757  | 1.02181035   | 6.37E-05 | 0.000140703 |
| GFRA3      | 2.634246545  | 0.118870051  | 6.40E-05 | 0.000141281 |
| RHOBTB1    | 1.197263886  | 4.526633651  | 6.44E-05 | 0.000142154 |
| SLC6A1-AS1 | 1.152877979  | -1.707900629 | 6.44E-05 | 0.000142157 |
| LOXL1-AS1  | 1.293975685  | -0.604370134 | 6.52E-05 | 0.000143762 |
| AC131009.4 | 1.042666812  | -2.694274912 | 6.58E-05 | 0.000145024 |
| DNMT3L     | -1.183561557 | -0.608619252 | 6.59E-05 | 0.000145217 |
| GATD3A     | -1.152974559 | 1.184058205  | 6.62E-05 | 0.000145853 |
| SHISA6     | 1.454022803  | -2.621668559 | 6.62E-05 | 0.000145863 |
| BEND6      | 1.536375053  | -1.893532456 | 6.66E-05 | 0.000146584 |
| DCLK1      | 1.188626052  | 0.305134468  | 6.68E-05 | 0.000146933 |
| LINC01836  | 1.153537437  | -0.688631774 | 6.68E-05 | 0.000147117 |
| LINC00460  | 3.057901098  | -3.178924368 | 6.75E-05 | 0.000148477 |
| LRRC37A7P  | -1.056698022 | 1.821967163  | 6.77E-05 | 0.000148906 |
| HMCN2      | 1.40997381   | 3.213440485  | 6.80E-05 | 0.000149651 |
| MEGF11     | 1.290195181  | -2.663202162 | 6.91E-05 | 0.000151784 |
| GALNT5     | 2.122319236  | -0.750918999 | 6.93E-05 | 0.000152185 |
| CNTNAP3    | 1.275794311  | 0.158205703  | 7.08E-05 | 0.000155403 |
| ZNF578     | 1.208638383  | -2.473100991 | 7.11E-05 | 0.000155925 |
| AC004231.1 | 1.79947122   | -2.607406788 | 7.13E-05 | 0.000156216 |
| RUFY4      | 1.127104296  | -1.347650223 | 7.18E-05 | 0.000157181 |
| CYCSP34    | 1.053069459  | -2.56620214  | 7.30E-05 | 0.00015983  |
| AL049873.2 | 1.028083697  | -2.814014552 | 7.34E-05 | 0.00016067  |
| ADCY8      | 2.991865723  | 0.556572889  | 7.38E-05 | 0.000161295 |
| AC016205.1 | 1.786908954  | -0.129040168 | 7.39E-05 | 0.00016154  |
| PRSS50     | 1.206512661  | -0.489405077 | 7.40E-05 | 0.000161732 |
| SYNGR1     | 1.061298382  | 3.619667251  | 7.41E-05 | 0.000162048 |
| MATN1      | 1.169838433  | -2.80654951  | 7.48E-05 | 0.000163341 |
| NRXN3      | 1.472217828  | 1.61006686   | 7.49E-05 | 0.000163609 |
| AC008592.5 | -1.089409307 | -1.702782144 | 7.52E-05 | 0.000164309 |
| AC004836.1 | 1.045137238  | -2.034929338 | 7.62E-05 | 0.000166262 |
| PCDHA7     | 1.711506456  | -2.404448531 | 7.73E-05 | 0.000168546 |
| BACE2      | 1.312191566  | 5.048576825  | 7.79E-05 | 0.000169699 |
| PLEKHD1    | 1.276088689  | -2.395133433 | 7.89E-05 | 0.000171584 |
| SLC47A1P2  | 1.0905067    | -1.974053745 | 7.91E-05 | 0.000172172 |
| MROH2B     | 2.481302277  | 1.655099906  | 7.99E-05 | 0.00017368  |
| ALG1L13P   | -1.113937729 | -0.729017781 | 8.01E-05 | 0.000174066 |
| TREH       | -1.069711017 | 2.249355069  | 8.10E-05 | 0.000176069 |
| FAM90A1    | 1.256223107  | -1.877285162 | 8.10E-05 | 0.000176069 |
| OXTR       | 1.42133883   | 1.049615484  | 8.21E-05 | 0.000178354 |
| BEGAIN     | 1.467116432  | 0.060028954  | 8.25E-05 | 0.000179098 |
| SYNDIG1    | 1.862074619  | -1.747402467 | 8.26E-05 | 0.000179284 |
| C7orf77    | 2.251933158  | -2.393830871 | 8.26E-05 | 0.000179354 |
| ASB11      | 2.048959726  | -2.514170024 | 8.29E-05 | 0.000180012 |
| AL590822.1 | 1.208468856  | -2.848846996 | 8.36E-05 | 0.000181436 |
| SLITRK1    | 3.13195421   | -2.740892628 | 8.36E-05 | 0.000181436 |
| RANBP17    | 1.133780484  | 1.340067239  | 8.41E-05 | 0.000182376 |
| GAPDHP14   | 1.485688904  | -1.599614021 | 8.57E-05 | 0.000185798 |
| POSTN      | 1.35934298   | 4.132007596  | 8.58E-05 | 0.00018588  |
| CLPSL1     | 4.084908578  | -3.127205565 | 8.63E-05 | 0.000186951 |
| GAD2       | 4.25342158   | -2.784287475 | 8.67E-05 | 0.00018774  |
| DMRT2      | 2.848667179  | -2.897437212 | 8.72E-05 | 0.000188666 |
| TCF23      | 1.312313008  | -1.944974744 | 8.81E-05 | 0.000190728 |
| ADAMDEC1   | 1.51448615   | 0.591337917  | 8.82E-05 | 0.000190848 |
| MB         | 1.305467559  | 0.371265318  | 8.82E-05 | 0.000190859 |
| DPP6       | 1.390558581  | -2.9586103   | 8.98E-05 | 0.000194205 |
| SLC29A4    | 1.397707249  | 4.479546565  | 9.05E-05 | 0.000195594 |
| ZNF727     | 1.570093048  | -2.132627643 | 9.11E-05 | 0.000196693 |

|            |              |              |             |             |
|------------|--------------|--------------|-------------|-------------|
| CDH3       | 1.500325431  | -0.69962669  | 9.22E-05    | 0.000198938 |
| AL513314.2 | 1.078418997  | -2.807015668 | 9.27E-05    | 0.000199964 |
| TP63       | 1.218148841  | -0.347182959 | 9.30E-05    | 0.000200609 |
| LINC02381  | 1.245176955  | 1.29218983   | 9.34E-05    | 0.000201443 |
| AC009093.7 | 1.786064385  | -2.634697816 | 9.36E-05    | 0.000201727 |
| TPSG1      | 1.707259134  | -0.985206626 | 9.36E-05    | 0.000201751 |
| LINC02211  | 2.47180898   | -2.844022364 | 9.57E-05    | 0.000206005 |
| LINC00844  | -1.325153786 | 3.657424053  | 9.62E-05    | 0.000206975 |
| IQCA1      | 1.374034512  | -0.228232953 | 9.62E-05    | 0.000207071 |
| TUBA3E     | 1.924353105  | -2.257778346 | 9.75E-05    | 0.000209709 |
| CDH26      | 1.120952323  | -1.625720631 | 9.82E-05    | 0.000211148 |
| SPRR1B     | -2.148702109 | -2.666207698 | 9.85E-05    | 0.000211694 |
| AKR1C2     | 1.035217442  | 8.240989083  | 9.98E-05    | 0.000214245 |
| AP001626.1 | 1.785572366  | -2.728182881 | 0.000100212 | 0.000215146 |
| ZNF114     | 1.034210221  | -2.350672498 | 0.000100449 | 0.000215593 |
| SGPP2      | 1.542866868  | 1.386635567  | 0.000100573 | 0.000215837 |
| FXYD2      | 1.989172176  | 4.253999477  | 0.000100916 | 0.000216532 |
| AC152010.1 | 4.842009556  | -2.377007237 | 0.000101009 | 0.00021669  |
| ABHD11-AS1 | 1.486010614  | -2.368215665 | 0.000101094 | 0.000216831 |
| LINC01303  | 1.530842183  | -2.468947224 | 0.00010323  | 0.000221264 |
| AP000924.1 | 1.602224153  | -1.024844019 | 0.000103541 | 0.000221823 |
| SPIB       | 1.801129209  | 1.334250839  | 0.000103607 | 0.000221923 |
| ARHGEF16   | 1.007145327  | 3.780026676  | 0.000105391 | 0.000225528 |
| AC079209.1 | 1.321506324  | -1.019431829 | 0.000105726 | 0.000226223 |
| CHEK2P2    | 3.493528285  | -3.112005984 | 0.000105813 | 0.000226389 |
| SULT1E1    | -1.086003344 | 3.123113169  | 0.000106136 | 0.000226949 |
| OPRK1      | 3.649164265  | -1.156175007 | 0.000107255 | 0.000229209 |
| FCGR2C     | 1.203461643  | 0.436740219  | 0.000111161 | 0.000237172 |
| FRMPD1     | 1.286573346  | 1.478120041  | 0.000111674 | 0.000238221 |
| ADGRF1     | 2.570772518  | -0.715983809 | 0.000112046 | 0.000238992 |
| GALR3      | 1.385197202  | -1.509271868 | 0.000112556 | 0.000240011 |
| APCDD1     | 1.691484069  | 3.780656864  | 0.00011338  | 0.000241681 |
| PIANP      | 1.484743097  | -2.405821537 | 0.000114474 | 0.000243823 |
| AL592293.1 | 1.741964867  | -2.905558093 | 0.00011515  | 0.000245098 |
| CSMD3      | 2.488428977  | -2.309001047 | 0.000115262 | 0.000245315 |
| RAB3C      | 1.690612375  | 1.579319478  | 0.000116865 | 0.00024849  |
| LINC00504  | 1.161364338  | -0.832981038 | 0.000116939 | 0.000248624 |
| LY96       | 1.02274503   | 2.899770532  | 0.00011759  | 0.000249793 |
| AC005162.3 | 1.105434306  | -2.250446591 | 0.000118573 | 0.00025181  |
| KRT1       | -1.735332979 | -1.287022114 | 0.000118657 | 0.000251964 |
| BSPRY      | 1.201644037  | 1.670468277  | 0.000119865 | 0.000254362 |
| IL1RAPL1   | 1.785320799  | -2.435814773 | 0.000120304 | 0.00025522  |
| AL358115.1 | 1.088714921  | -2.935868025 | 0.000120353 | 0.0002553   |
| FAT2       | 1.151146421  | -1.906017526 | 0.000120522 | 0.00025561  |
| PCDHGA2    | 1.228346295  | 1.252213789  | 0.000121026 | 0.000256606 |
| AC106869.1 | 1.073079089  | -2.554492468 | 0.000121668 | 0.000257918 |
| KCNJ10     | -1.095509356 | 0.613373088  | 0.000124292 | 0.00026323  |
| AC010501.1 | 1.130493153  | -1.492971323 | 0.00012483  | 0.000264271 |
| TRPC3      | 1.887251801  | -1.434088482 | 0.000125257 | 0.000265125 |
| LANCL1-AS1 | 1.058872632  | -2.824039335 | 0.000125286 | 0.00026516  |
| LINC01619  | 1.056337364  | -1.12143874  | 0.000125746 | 0.000266108 |
| AC131097.2 | 2.008923767  | -1.590296124 | 0.000125986 | 0.000266591 |
| DLX3       | 2.237652463  | -2.605426683 | 0.000126217 | 0.000267054 |
| PNLDC1     | 1.561452666  | -1.788542064 | 0.000126628 | 0.000267824 |
| AC097658.1 | 1.076771774  | -2.286810959 | 0.00012716  | 0.000268822 |
| RAP2CP1    | 1.486846641  | -2.802000343 | 0.000127603 | 0.000269682 |
| LINC02038  | 1.380882841  | -2.357998717 | 0.000128764 | 0.000272032 |
| LINC01152  | 1.475847618  | -0.671386101 | 0.000130656 | 0.000275638 |

|              |              |              |             |             |
|--------------|--------------|--------------|-------------|-------------|
| AL121949.1   | 2.62979936   | -2.135902371 | 0.000130694 | 0.000275693 |
| AL121974.1   | 3.016219762  | -2.036079638 | 0.000132007 | 0.000278305 |
| ACPP         | 1.730565644  | -0.760663484 | 0.000133551 | 0.000281322 |
| PCDHA6       | 2.057473884  | -2.086415762 | 0.00013445  | 0.000283083 |
| PRR15        | 1.653683887  | 0.589189375  | 0.00013499  | 0.000284193 |
| TMEM45B      | 1.010034102  | 6.025537394  | 0.000135929 | 0.000286061 |
| CNTN3        | -1.30533025  | 0.925391587  | 0.000136222 | 0.000286651 |
| FAM151A      | -1.308987507 | 2.422587858  | 0.000137589 | 0.000289366 |
| RSPO4        | 1.667183825  | -1.885365679 | 0.000139304 | 0.00029278  |
| EDA2R        | 1.1001242    | 0.589826706  | 0.00014013  | 0.00029446  |
| ABHD12B      | 1.053057005  | -0.15578789  | 0.000140646 | 0.000295489 |
| TMEM246      | 1.020380441  | 2.917158432  | 0.000141446 | 0.000297113 |
| FOXQ1        | 1.513363505  | 2.558930709  | 0.000141538 | 0.000297278 |
| C6orf52      | 1.068450718  | -0.906250797 | 0.000141729 | 0.000297653 |
| GUCY1B2      | 1.709846614  | -0.852916352 | 0.000142744 | 0.000299643 |
| CCL28        | 1.057643424  | 2.421502161  | 0.000143244 | 0.000300665 |
| AC020571.1   | 1.511159243  | -2.202701435 | 0.000143697 | 0.000301446 |
| LINC01993    | 1.642416199  | -2.571737225 | 0.000144152 | 0.000302335 |
| RASL10B      | 1.579017419  | 3.561542441  | 0.000144432 | 0.000302861 |
| LMO7-AS1     | 1.228183771  | -2.439130667 | 0.000144439 | 0.000302861 |
| CPHL1P       | 1.275384594  | -0.178018302 | 0.000145427 | 0.00030479  |
| BARX1        | 2.086808618  | -0.523292195 | 0.000146391 | 0.000306695 |
| AJ009632.2   | 1.527429411  | 0.28469135   | 0.000146895 | 0.000307692 |
| KLK13        | 2.842956193  | -2.036222997 | 0.000147556 | 0.000308962 |
| GSTA2        | -1.174554523 | 7.461977695  | 0.000147999 | 0.000309831 |
| ZNF66        | 1.071769832  | -1.545398081 | 0.000149177 | 0.00031218  |
| CTLA4        | 1.098644026  | 0.053008745  | 0.000149416 | 0.000312652 |
| TERB2        | -1.292325963 | -1.140126915 | 0.000150139 | 0.000313988 |
| MIR1-1HG-AS1 | 2.040849188  | -2.69013185  | 0.000150665 | 0.000314972 |
| GCSAML       | 1.903390071  | -2.011453009 | 0.000152207 | 0.000317896 |
| SUSD4        | 1.40256901   | 3.889027795  | 0.000155791 | 0.000324866 |
| LINC01344    | 1.110577408  | -1.109763702 | 0.000157782 | 0.000328835 |
| RGS6         | 1.320022734  | -1.386445927 | 0.000161365 | 0.000335771 |
| MUC5B        | 2.65810681   | 5.72597098   | 0.00016252  | 0.000338048 |
| MSC-AS1      | 1.17753798   | 1.648710403  | 0.000164536 | 0.000341988 |
| NPIPA3       | 1.132504739  | -2.517358436 | 0.00016471  | 0.000342318 |
| LY86-AS1     | 2.061129313  | -2.156421497 | 0.00016541  | 0.000343613 |
| S100A14      | 1.347830967  | 4.619432014  | 0.000167016 | 0.000346659 |
| AC100826.1   | 1.694099055  | -2.507193818 | 0.000170232 | 0.00035298  |
| TH2LCRR      | 1.249859864  | -3.09010217  | 0.000172745 | 0.000357786 |
| MT1DP        | -1.225284542 | 1.438752133  | 0.000172917 | 0.00035811  |
| BEND4        | -1.213176773 | -2.424123343 | 0.000173657 | 0.000359542 |
| POU2F3       | 1.306992578  | -0.632872904 | 0.000176071 | 0.000364136 |
| AC131097.1   | 1.785110588  | -2.66523258  | 0.000177197 | 0.000366397 |
| STK31        | 1.26383576   | -1.362017918 | 0.000178736 | 0.000369341 |
| LINC02247    | 3.681720227  | -2.616135475 | 0.000179406 | 0.000370623 |
| OLFM3        | 2.950874774  | -2.102288243 | 0.000179428 | 0.000370633 |
| BX322559.1   | 4.267259773  | -2.910297799 | 0.000179579 | 0.000370878 |
| DUOXA1       | 1.644776425  | -1.818215097 | 0.000179994 | 0.000371699 |
| HYDIN2       | 1.452223318  | -2.892404466 | 0.000180248 | 0.000372191 |
| ZPLD1        | 2.434972602  | 0.725791982  | 0.000181847 | 0.000375387 |
| ERVE-1       | -1.62859736  | -2.770096116 | 0.000182681 | 0.00037704  |
| NECAB1       | 1.083558411  | 0.193615025  | 0.000189291 | 0.000389926 |
| ASXL3        | -1.096162688 | -0.488734659 | 0.000192763 | 0.000396714 |
| TESC-AS1     | 1.776249398  | -2.55876533  | 0.000199032 | 0.000408801 |
| TMEM200A     | 1.00865444   | 0.279353002  | 0.000199964 | 0.000410589 |
| AC004593.1   | 1.248698853  | -1.857240832 | 0.0002006   | 0.000411782 |
| IGKV1-8      | -1.413559387 | -0.362642283 | 0.000205655 | 0.000421618 |

|             |              |              |             |             |
|-------------|--------------|--------------|-------------|-------------|
| AP000424.2  | 1.437386162  | -2.80310778  | 0.000207141 | 0.000424548 |
| NFE4        | 2.458311939  | -2.270921401 | 0.000207624 | 0.000425381 |
| AC019117.1  | 1.129234417  | -0.574549343 | 0.000208686 | 0.000427479 |
| ERVW-1      | 1.836845566  | -3.010210087 | 0.000210503 | 0.000430807 |
| BX470209.1  | 1.98921853   | -2.61171555  | 0.000213646 | 0.00043712  |
| CYP24A1     | 2.573087382  | -2.737945508 | 0.000217175 | 0.000444055 |
| MTCO1P42    | 2.593813941  | -2.281414655 | 0.000217703 | 0.000445012 |
| NT5DC4      | 1.329218544  | -2.684224401 | 0.000220617 | 0.00045068  |
| MYMK        | 2.08135521   | -2.418413103 | 0.000222686 | 0.000454741 |
| AC080188.2  | 1.024819848  | -2.907228611 | 0.000225363 | 0.000459998 |
| AC120498.10 | 1.789262639  | -2.621091437 | 0.000231345 | 0.000471263 |
| SDK2        | 1.462616674  | 1.230590383  | 0.000235433 | 0.000479066 |
| MMEL1       | 1.173077819  | -1.604161925 | 0.000241521 | 0.000490741 |
| BX539320.1  | 1.10326238   | -2.368996343 | 0.000241713 | 0.000491086 |
| ADAD1       | 3.930274641  | -3.110822071 | 0.000242184 | 0.000491953 |
| CCR8        | 1.328924386  | -2.90857881  | 0.000242211 | 0.000491964 |
| IRX5        | 1.472691413  | -1.060565252 | 0.000243732 | 0.000494919 |
| LMO3        | 1.018067585  | -0.96835242  | 0.000245565 | 0.000498234 |
| PLN         | 1.305486096  | 0.5356037    | 0.000248863 | 0.000504467 |
| XAGE2       | 3.342552041  | -2.576872281 | 0.000253514 | 0.00051343  |
| VN1R48P     | 1.454374175  | -2.780320574 | 0.000259954 | 0.000525853 |
| SERTM2      | -1.498106361 | 2.568229881  | 0.0002606   | 0.000527113 |
| GABRG3      | 1.795439682  | -1.716344092 | 0.000261292 | 0.000528465 |
| AC048380.2  | 1.021853309  | -2.672593204 | 0.00026402  | 0.000533741 |
| AC021723.1  | 1.490581336  | -2.848587344 | 0.000264161 | 0.000533978 |
| CPEB1       | 1.763615558  | -1.01367351  | 0.000264421 | 0.000534454 |
| HPGD        | -1.082685997 | 6.493826367  | 0.000267747 | 0.000540591 |
| CCL20       | 1.305866117  | 5.098044663  | 0.000269283 | 0.000543448 |
| AC026336.3  | 4.216429656  | -2.466138699 | 0.000270539 | 0.000545786 |
| MYBPC3      | 1.390495169  | -1.845784183 | 0.000271204 | 0.000547078 |
| HSPA6       | 1.238906778  | 3.060735333  | 0.000271544 | 0.000547712 |
| AC016723.1  | 1.753481198  | -2.195709272 | 0.000275285 | 0.000554611 |
| LINC00323   | 1.723087037  | -3.025876179 | 0.000276466 | 0.00055684  |
| PAX2        | 2.302406227  | -1.040688897 | 0.000280155 | 0.000563813 |
| FUNDC2P2    | 1.57624403   | -1.876792882 | 0.00028029  | 0.000564033 |
| CPNE4       | 1.657882421  | -3.083606711 | 0.000282099 | 0.000567469 |
| COL10A1     | 1.678774936  | 0.421906837  | 0.000285466 | 0.000573933 |
| AC131009.2  | 1.22072926   | -1.655382669 | 0.000286834 | 0.000576477 |
| KIAA1549L   | 1.41255863   | -0.948726069 | 0.00028848  | 0.000579576 |
| CST5        | 2.304402333  | -2.237269284 | 0.000288769 | 0.000580052 |
| LINC02544   | 1.59791502   | -2.935356048 | 0.00029163  | 0.000585274 |
| WNT10B      | 1.090398955  | -1.69162167  | 0.000294377 | 0.000590416 |
| MEG9        | 1.765618662  | -1.303306776 | 0.000295365 | 0.000592218 |
| AC010980.1  | 1.797110243  | -3.034910056 | 0.000295381 | 0.000592218 |
| SLC2A14     | 1.385166079  | -0.221798565 | 0.000296939 | 0.000595129 |
| SERPINB7    | 3.695821534  | -2.260756186 | 0.000298418 | 0.000597986 |
| LINC00470   | 1.548386382  | 0.076699106  | 0.000300874 | 0.000602584 |
| AC122713.2  | -1.085358964 | 0.339435167  | 0.000300982 | 0.000602746 |
| ROR1        | 1.13679621   | 0.721727596  | 0.000302998 | 0.000606619 |
| NMU         | 1.826662878  | -3.093055841 | 0.000303557 | 0.000607684 |
| PSD2        | 1.099519772  | -2.136104046 | 0.000305744 | 0.000611516 |
| GAPDHP1     | 1.079287124  | 3.0907175    | 0.000305913 | 0.000611799 |
| NMRK2       | 2.671493599  | -1.86439481  | 0.00030828  | 0.000616311 |
| KRT6B       | -1.639814992 | -0.886465933 | 0.000308339 | 0.000616375 |
| GPC5        | 1.470531368  | 0.922410752  | 0.000319617 | 0.000637553 |
| CSDC2       | -1.094865668 | -0.778512739 | 0.000320183 | 0.000638568 |
| TBX18       | 1.449109729  | -0.205262032 | 0.000322506 | 0.00064303  |
| KRT17P4     | -1.196975215 | -2.310613707 | 0.000323582 | 0.00064509  |

|            |              |              |             |             |
|------------|--------------|--------------|-------------|-------------|
| C6orf223   | 2.004670009  | 2.459933858  | 0.000324108 | 0.00064605  |
| TDRD9      | 1.612589551  | -0.314846588 | 0.00033159  | 0.000659907 |
| AC136475.3 | 1.2663624    | 1.906262336  | 0.000332931 | 0.000662398 |
| LGALS9B    | 1.928330049  | -1.768052692 | 0.000333477 | 0.000663307 |
| SPAG17     | 1.475876501  | -2.511166303 | 0.000340867 | 0.000677283 |
| LRR36      | 1.244522401  | -2.263088244 | 0.000342658 | 0.000680541 |
| CALB2      | 1.6608171    | -2.03597612  | 0.000342933 | 0.000681026 |
| AC124798.1 | 1.045242111  | 0.529404237  | 0.000343981 | 0.000683047 |
| CELF2-AS1  | 1.937040166  | -2.922527898 | 0.000344721 | 0.000684334 |
| CPSF4L     | 1.154331878  | -2.9486551   | 0.000345445 | 0.000685528 |
| NUP210L    | 1.427718721  | -2.601804837 | 0.000349316 | 0.000692903 |
| UGT2B26P   | 1.266743563  | -2.553443013 | 0.000349626 | 0.000693395 |
| AC104072.1 | 3.323357571  | -2.699969252 | 0.000351631 | 0.000696815 |
| NCAN       | 1.625153844  | -1.64092407  | 0.000363481 | 0.000718833 |
| SERPINB3   | 3.8709265    | -0.779280517 | 0.000367907 | 0.000727073 |
| BATF       | 1.022871183  | 2.13488493   | 0.000368359 | 0.000727901 |
| COX6A2     | -1.173312711 | 0.895441781  | 0.000369371 | 0.000729773 |
| DIO3OS     | -1.133637033 | 1.413829457  | 0.00037066  | 0.00073206  |
| DUSP26     | 1.258649622  | -1.394975828 | 0.000372634 | 0.0007357   |
| RIMKLA     | 1.080207437  | -0.529243422 | 0.000373911 | 0.000738012 |
| AC104581.3 | 1.101316473  | -2.877442541 | 0.000379201 | 0.000747676 |
| LPAR3      | 2.244126103  | -0.6239096   | 0.00038158  | 0.000751969 |
| AL117382.1 | 1.083417176  | -1.153049818 | 0.000387912 | 0.000763505 |
| EWSAT1     | 1.039261663  | -1.329757483 | 0.000388223 | 0.00076405  |
| LINC00222  | 1.060249829  | -2.120523487 | 0.000389317 | 0.000765935 |
| FOXL2      | 2.350002075  | -2.934076854 | 0.000393394 | 0.000773343 |
| KCNA1      | 3.069413082  | -3.3788435   | 0.000400546 | 0.000786296 |
| DEGS2      | 1.114504307  | 0.633843739  | 0.000400868 | 0.000786861 |
| SHC4       | 1.281689861  | -0.632851923 | 0.00040127  | 0.000787581 |
| ACTC1      | 1.674971828  | -2.140819395 | 0.000403182 | 0.000791056 |
| CLDN4      | 1.420713258  | 5.029117283  | 0.00040579  | 0.000795685 |
| SYT6       | 1.300633719  | -2.837411604 | 0.000410589 | 0.000804883 |
| SNORA59B   | 1.082387665  | -1.822015528 | 0.000416532 | 0.000815818 |
| ADGRG5     | 1.131232765  | 2.615579754  | 0.000418668 | 0.000819786 |
| PRTG       | 1.161641602  | -0.872725232 | 0.000423595 | 0.000829143 |
| VLDLR-AS1  | 1.335862125  | -2.230745259 | 0.000427195 | 0.000835678 |
| TTYH1      | 1.512085444  | 1.684112561  | 0.000427412 | 0.000835957 |
| CDS1       | 1.196635398  | 2.279253832  | 0.000429631 | 0.000840076 |
| AC013652.1 | 1.193109851  | -1.401045949 | 0.000432131 | 0.000844595 |
| PRSS16     | 1.933714273  | 0.504967621  | 0.000434757 | 0.000849284 |
| AC027228.2 | 1.144035745  | -2.862554696 | 0.000435323 | 0.00085024  |
| ADGRF4     | 2.251008881  | -2.402822579 | 0.000437346 | 0.000854042 |
| RASEF      | 1.121866041  | 2.999089487  | 0.000437865 | 0.000854982 |
| LRR36      | 1.068288523  | -1.625561987 | 0.000438478 | 0.000856028 |
| C9orf106   | 1.101704443  | -2.111684667 | 0.000441849 | 0.00086246  |
| GAL3ST2    | 1.400884159  | -1.947928142 | 0.000442924 | 0.00086427  |
| ADGRG3     | 1.213187474  | 1.598499607  | 0.000445654 | 0.000869355 |
| EPN3       | 1.497848046  | -0.214886105 | 0.000446123 | 0.000870118 |
| C11orf53   | 2.856942154  | -1.592012627 | 0.000454773 | 0.0008856   |
| AC018816.1 | 1.041425102  | -0.842957236 | 0.000455226 | 0.000886406 |
| AC124312.3 | 1.269918667  | -2.577690829 | 0.000455729 | 0.000887231 |
| ACSM1      | 1.286266693  | 5.303431476  | 0.000456438 | 0.000888455 |
| COL9A3     | 1.169918361  | 2.586513183  | 0.000457986 | 0.000891082 |
| RPS6KA6    | -1.271078987 | -0.687472268 | 0.000462159 | 0.00089842  |
| AGAP12P    | 1.03642022   | -1.933426676 | 0.00046354  | 0.000901026 |
| XK         | 1.051418847  | 1.817956241  | 0.000465394 | 0.000904315 |
| GSTM1      | -1.402386865 | 5.920067865  | 0.000465633 | 0.000904672 |
| AL023583.1 | 1.140183225  | -2.223038405 | 0.000472057 | 0.000916227 |

|            |              |              |             |             |
|------------|--------------|--------------|-------------|-------------|
| ACTN3      | 1.297371819  | -2.989506813 | 0.000479476 | 0.000929097 |
| HLA-U      | 1.046458456  | -1.74677463  | 0.000487114 | 0.000942673 |
| SHANK1     | 1.148255878  | -2.098401984 | 0.00048995  | 0.000947614 |
| ADAMTS7P3  | 1.056776777  | -2.84969065  | 0.000490897 | 0.000949255 |
| P2RX2      | 2.472553617  | -0.795374521 | 0.000493489 | 0.000954101 |
| SMPDL3B    | 1.127369666  | 0.709387107  | 0.000497126 | 0.000960552 |
| TSSC2      | 1.010254127  | -1.434776778 | 0.000498854 | 0.000963645 |
| CRP        | -1.17940595  | 11.13050222  | 0.000502236 | 0.000969755 |
| TRDN       | 2.914354051  | -1.355402315 | 0.000511385 | 0.000986145 |
| KCNH3      | 1.17331275   | -0.252521883 | 0.000513129 | 0.000989423 |
| SCNN1B     | 1.292061628  | -0.152779896 | 0.000514547 | 0.000991815 |
| SLC25A24P1 | 2.307312013  | -3.077560534 | 0.000519437 | 0.001000723 |
| BCL2L14    | 1.075744826  | 0.423737344  | 0.000527385 | 0.001015072 |
| GALNT9     | 1.672728807  | -1.712931195 | 0.000528726 | 0.001017393 |
| LINC01671  | 1.211122469  | -0.005528718 | 0.000529596 | 0.001018804 |
| SPINT1     | 1.380348566  | 4.7564272    | 0.000531862 | 0.001022978 |
| PI3        | 1.705978543  | 1.528322171  | 0.000533294 | 0.001025566 |
| WNT4       | 1.304245379  | 2.649029908  | 0.000534767 | 0.001028221 |
| SLC22A17   | 1.285912758  | 3.370454213  | 0.000535341 | 0.001029236 |
| IGKV5-2    | -1.379812747 | -2.452769661 | 0.000540522 | 0.00103893  |
| ST8SIA2    | 2.302842603  | -3.022746136 | 0.000541293 | 0.001040233 |
| FCRLA      | 1.511506234  | 0.610842048  | 0.000543431 | 0.001043983 |
| LOXL4      | 1.114820028  | 4.658371333  | 0.000550274 | 0.001056223 |
| MGAM       | 1.484772261  | 0.490027009  | 0.00056207  | 0.00107757  |
| CCNJL      | 1.017301226  | 0.310131272  | 0.00057263  | 0.001096687 |
| IGF2-AS    | 1.951634788  | 0.588084946  | 0.000574547 | 0.001100265 |
| SLC7A4     | -1.189691496 | -1.689770482 | 0.000576513 | 0.001103652 |
| ZG16B      | 1.440869541  | 0.782454383  | 0.00057761  | 0.001105373 |
| EPCAM      | 1.73573775   | 5.305169323  | 0.00057761  | 0.001105373 |
| PRIMA1     | -1.392793488 | -1.638161736 | 0.00058201  | 0.001113127 |
| AP3B2      | 1.526413849  | -1.924358149 | 0.000587919 | 0.001123469 |
| AC100793.4 | 1.031850231  | -2.801244904 | 0.000590189 | 0.001127613 |
| KRT23      | 1.700531961  | 5.028885702  | 0.000590851 | 0.001128783 |
| TRPC5      | -1.068831933 | -0.896036482 | 0.000591151 | 0.001129259 |
| GOLGA6B    | -1.190652795 | -2.658168452 | 0.000600958 | 0.001147112 |
| AP001476.1 | 1.784163927  | -3.031923642 | 0.000604401 | 0.001153092 |
| UGT2A1     | -1.222052922 | 1.326027701  | 0.000608037 | 0.001159535 |
| FBLL1      | 1.352625224  | 0.614914544  | 0.000619401 | 0.001179914 |
| FGF20      | 2.226969401  | -2.718045651 | 0.00062492  | 0.001190006 |
| LHFPL3     | 2.05677631   | -2.497397702 | 0.000628462 | 0.001196345 |
| CR392039.2 | 1.529869166  | -2.377290152 | 0.0006436   | 0.001223184 |
| EPHA1-AS1  | 1.148377902  | -1.895122115 | 0.000644666 | 0.001225002 |
| PIFO       | 1.191162973  | -1.231851415 | 0.000648112 | 0.001230818 |
| HAP1       | 1.231394246  | -0.99342996  | 0.000649063 | 0.001232415 |
| LINC01705  | 1.519457239  | -1.913057477 | 0.000649954 | 0.001234002 |
| CR1L       | -1.062782786 | -2.555257865 | 0.000651238 | 0.001236126 |
| SLC6A4     | 1.123697079  | -1.66166995  | 0.000657688 | 0.001247521 |
| NWD1       | 1.392994543  | -2.686136981 | 0.000658608 | 0.001249161 |
| PAX8-AS1   | 1.014029727  | 2.638210527  | 0.000658685 | 0.001249202 |
| EYA4       | 2.08063692   | -0.419574953 | 0.000667071 | 0.001263926 |
| AP001636.2 | 1.159581523  | -2.859743932 | 0.000676407 | 0.001280531 |
| MIR646HG   | 1.237121567  | -1.448965635 | 0.000679067 | 0.001285132 |
| MYT1L      | 2.370951131  | -1.889462151 | 0.000685347 | 0.001295592 |
| HAS2       | -1.073493744 | 0.491820358  | 0.000692072 | 0.001307753 |
| NPBWR1     | -1.283266754 | -0.483762195 | 0.000696098 | 0.001314806 |
| AC022167.4 | -1.023995683 | -1.644291919 | 0.000699918 | 0.001321352 |
| KANK4      | -1.146494342 | 0.978580402  | 0.000706388 | 0.001332555 |
| ZNF750     | 1.162261724  | -2.569815813 | 0.000707314 | 0.001334189 |

|            |              |              |             |             |
|------------|--------------|--------------|-------------|-------------|
| ZNF888     | 1.068385873  | -2.607707954 | 0.000716376 | 0.001350599 |
| EDN3       | 2.190864549  | -2.662898815 | 0.000719112 | 0.001355416 |
| RNASE2     | 1.275896974  | -1.00196862  | 0.000719223 | 0.001355511 |
| FAM9A      | 2.391934802  | -2.868533754 | 0.000722902 | 0.001361985 |
| GRM7       | 1.641870397  | -1.846235125 | 0.000724405 | 0.001364701 |
| GPR88      | 1.580866836  | 5.160407047  | 0.00072809  | 0.001371412 |
| RFPL1S     | 1.173093011  | -1.336925109 | 0.000737379 | 0.001387625 |
| PRSS30P    | 1.020151017  | -1.917677826 | 0.000744077 | 0.001398817 |
| KLK3       | 3.972583366  | 0.529428602  | 0.000761084 | 0.001429107 |
| KCNH7      | -1.089001607 | -2.132244292 | 0.000762753 | 0.001431641 |
| VANGL2     | 1.200822353  | 1.270762397  | 0.000764917 | 0.00143486  |
| AC254629.1 | 1.203286139  | -1.920366964 | 0.000772062 | 0.001447414 |
| CHI3L2     | 1.078051071  | -0.346840601 | 0.00078058  | 0.00146277  |
| PCDHGC5    | 1.339891448  | -3.005158303 | 0.0007821   | 0.001465374 |
| GPR27      | 1.544203107  | -0.593815942 | 0.000785926 | 0.001472295 |
| AC073283.2 | 1.52903638   | -2.141512777 | 0.000789359 | 0.001478109 |
| AL590560.1 | 1.00225319   | -2.513872435 | 0.000791684 | 0.001481966 |
| DIRAS2     | 1.550518273  | 0.257433086  | 0.000807371 | 0.001508932 |
| TMC4       | 1.245912246  | 3.884755295  | 0.000808464 | 0.001510848 |
| DHRS2      | 1.465207737  | 6.145610082  | 0.000810709 | 0.001514664 |
| DOC2A      | 1.019080974  | -1.410928526 | 0.000811168 | 0.001515396 |
| AL117190.1 | 1.770222923  | -2.353402338 | 0.000814913 | 0.00152201  |
| LINC00923  | 1.516559221  | -1.914261126 | 0.000841106 | 0.001568442 |
| SNTG1      | 1.683929487  | -0.160826331 | 0.000844739 | 0.001574694 |
| PLA2G4E    | 1.239328434  | -2.954427848 | 0.000854412 | 0.001591795 |
| CA3        | 1.568014402  | 1.278698048  | 0.000857779 | 0.001597888 |
| AC104692.1 | 1.349215237  | -2.002729215 | 0.000867776 | 0.001614945 |
| KCNK10     | 1.416353067  | -2.313181479 | 0.000879111 | 0.001635632 |
| TUBA3D     | 1.032940932  | -1.29090366  | 0.000893753 | 0.001661079 |
| AC008163.1 | 1.818746393  | -1.532278232 | 0.000898063 | 0.001668566 |
| WNT1       | 1.791955651  | -2.811297617 | 0.000926487 | 0.001717778 |
| PPP1R27    | 1.045148325  | -2.323630396 | 0.000931562 | 0.00172633  |
| ROR2       | 1.02850295   | 1.101546262  | 0.000943616 | 0.001746498 |
| FGF5       | 2.863672114  | -3.072074637 | 0.000944841 | 0.00174862  |
| LMOD2      | 1.458368035  | -2.883845066 | 0.000964202 | 0.001782388 |
| CYP4F23P   | 1.323980709  | -2.205513605 | 0.000971215 | 0.001794166 |
| HECW1      | 1.086059496  | -0.729309038 | 0.000990475 | 0.001827851 |
| MEG8       | 1.935740966  | -2.488258596 | 0.000990511 | 0.001827851 |
| KCNK2      | 2.129478082  | -1.022883934 | 0.000996345 | 0.001838162 |
| RPS14P8    | 1.22205279   | -1.556344784 | 0.001002287 | 0.001848361 |
| SLC35F3    | 1.471609957  | -1.465274545 | 0.001032682 | 0.001901593 |
| ESRP1      | 1.992757629  | 2.603999224  | 0.001036321 | 0.001907666 |
| ARSI       | 1.012559819  | 0.271613702  | 0.001045396 | 0.001923653 |
| LINC01014  | 2.44236786   | -2.887568891 | 0.001055815 | 0.00194157  |
| CCDC169    | 1.959844071  | -3.083943032 | 0.001057938 | 0.001944579 |
| WFIKKN2    | 1.735581281  | -1.828920109 | 0.001089872 | 0.001998351 |
| AC103702.2 | 1.908354556  | -2.825847839 | 0.001095347 | 0.002008062 |
| LINC02232  | 2.719615816  | -2.39907318  | 0.001100319 | 0.002016185 |
| TCP10      | 1.683606772  | -2.506793841 | 0.001116209 | 0.002043293 |
| ERLNC1     | 1.027583199  | -2.259204339 | 0.001127391 | 0.002062414 |
| SPINK4     | 2.393352888  | -1.703072385 | 0.001128311 | 0.002063928 |
| HUNK       | 1.124445524  | 2.044862897  | 0.001131131 | 0.002068917 |
| FA2H       | 1.655610594  | 0.744178693  | 0.001135945 | 0.002077042 |
| BCL11A     | 1.021679402  | 0.128534528  | 0.001138434 | 0.002081083 |
| ARNT2      | 1.088590195  | 2.083317867  | 0.001160807 | 0.002119731 |
| VAT1L      | 1.2940086    | 1.698193286  | 0.001166335 | 0.002129304 |
| AC147651.1 | 2.350130629  | -1.352239701 | 0.00119092  | 0.002171529 |
| SPATA46    | 1.515646551  | -1.40782134  | 0.001191667 | 0.002172639 |

|             |              |              |             |             |
|-------------|--------------|--------------|-------------|-------------|
| POF1B       | 1.421337508  | 1.763049339  | 0.001223474 | 0.002226715 |
| HRASLS5     | 1.501946836  | -2.146503992 | 0.001228267 | 0.002234893 |
| UPK1B       | -1.264948571 | -2.487248522 | 0.001242556 | 0.002259423 |
| CYP11B2     | 4.570345542  | -0.260254689 | 0.001256207 | 0.002282205 |
| TMEM255A    | 1.006355398  | 0.111959514  | 0.001266625 | 0.002298146 |
| AC090825.1  | 1.072442067  | -2.337487309 | 0.001267771 | 0.002299856 |
| BDNF        | 1.079211605  | -1.499508525 | 0.00126959  | 0.002302592 |
| CSAG2       | 2.246839576  | -1.458570147 | 0.001293704 | 0.002341771 |
| SOX1        | 3.226094811  | -2.225733844 | 0.001305727 | 0.002362195 |
| PLPPR3      | 1.46504879   | -2.813008646 | 0.001323072 | 0.002391448 |
| AL162293.1  | 1.490069221  | -1.865614308 | 0.001330049 | 0.002403034 |
| ANXA8       | -1.112596476 | -0.945705837 | 0.001341663 | 0.002422703 |
| SLC2A1-AS1  | 1.018243559  | -2.386346358 | 0.001375534 | 0.002481863 |
| AL138749.1  | -1.602328056 | -2.761247795 | 0.001376334 | 0.002482906 |
| CDX1        | 1.331263291  | -1.710892219 | 0.001417673 | 0.002554186 |
| HOXD13      | 2.607936938  | -2.783442407 | 0.001439407 | 0.002589714 |
| SH3RF3-AS1  | 1.013956485  | -1.267331779 | 0.001461388 | 0.002625969 |
| ANXA13      | 1.089451051  | 4.615379639  | 0.001463397 | 0.002629134 |
| PDPN        | 1.271140101  | 0.373767145  | 0.001465375 | 0.002632169 |
| AC127496.5  | 1.162497642  | -2.804840826 | 0.001465427 | 0.002632169 |
| HCN4        | 1.698209253  | -1.717882844 | 0.001471229 | 0.002642167 |
| AC009084.2  | 1.06490976   | -1.671668    | 0.001476893 | 0.002651699 |
| PADI2       | 1.053784706  | 1.167555229  | 0.001483968 | 0.002663547 |
| PIK3CD-AS2  | 1.049901401  | -0.789441968 | 0.001484214 | 0.002663776 |
| AGRP        | 1.216504229  | -2.455171429 | 0.001492142 | 0.002677575 |
| AC129492.1  | 1.34527697   | -2.968482733 | 0.001506741 | 0.002702254 |
| AC138649.1  | 1.12088299   | -2.775228189 | 0.001521771 | 0.002727396 |
| COL17A1     | 1.04713084   | -0.983365497 | 0.001522231 | 0.002727754 |
| MIR378B     | 1.017774855  | -2.813635758 | 0.001571961 | 0.002811112 |
| FAIM2       | 1.072035924  | -1.637546444 | 0.001578648 | 0.002822393 |
| HTRA4       | 1.119195228  | -2.043474409 | 0.001614117 | 0.002880885 |
| CBLN4       | 1.612225803  | 1.210833591  | 0.001614197 | 0.002880885 |
| EREG        | 1.846601189  | 0.68510185   | 0.00163062  | 0.002908572 |
| GLI2        | 1.302902691  | 0.773627693  | 0.001659515 | 0.002957331 |
| OLR1        | 1.33092131   | 1.242045038  | 0.001659542 | 0.002957331 |
| AL390778.2  | -1.704062666 | -2.298997762 | 0.001664121 | 0.002964075 |
| GREM2       | -1.015267963 | 4.377373382  | 0.001678729 | 0.002987717 |
| SLCO4A1-AS1 | 1.945514524  | -1.464190559 | 0.00172882  | 0.003071003 |
| GRM3        | 1.76387837   | -2.199093591 | 0.001739959 | 0.003090054 |
| SLC3A1      | -1.063883224 | 3.614654758  | 0.001749946 | 0.003106065 |
| ITGB6       | 1.201091178  | 0.40544925   | 0.001755169 | 0.003114841 |
| SLC22A2     | 1.337524229  | -1.579738978 | 0.001771482 | 0.003142545 |
| CNTN2       | 1.057123758  | -1.967737269 | 0.001783112 | 0.003161671 |
| AP005233.2  | 1.977154788  | -2.810463663 | 0.001803648 | 0.003194703 |
| ANK1        | 1.029249604  | -0.611046702 | 0.001832916 | 0.003242785 |
| LMX1A       | 1.521792318  | -2.353274297 | 0.001833945 | 0.003244091 |
| DNAAF1      | 1.268074554  | 0.759180713  | 0.001838416 | 0.00325123  |
| SLC14A2     | 1.466164346  | -0.545167499 | 0.001847803 | 0.003266539 |
| AC002480.1  | 1.085948411  | -2.899642181 | 0.001857702 | 0.003282224 |
| GRAMD2A     | 1.103893887  | -2.484323702 | 0.001885    | 0.003328352 |
| TMEM156     | 1.011182125  | 2.159221154  | 0.001915867 | 0.003379919 |
| GCK         | 1.863291991  | 3.857407327  | 0.001941421 | 0.003420148 |
| AC106798.1  | 1.506715615  | -2.85287698  | 0.001954553 | 0.003441927 |
| KLK6        | 2.293879143  | -2.013718287 | 0.00196132  | 0.00345167  |
| KRBOX1      | 1.051594415  | -1.926315461 | 0.001979211 | 0.003480965 |
| AC098617.1  | 1.519537094  | -2.990275111 | 0.002000941 | 0.003517249 |
| RGS7        | -1.3301073   | -2.925901291 | 0.00200241  | 0.003519278 |
| AC092068.2  | 1.139971318  | -2.62438057  | 0.002006963 | 0.003527002 |



|            |              |              |             |             |
|------------|--------------|--------------|-------------|-------------|
| CFAP47     | 1.238363817  | -2.061467277 | 0.002037279 | 0.003576066 |
| RBBP8NL    | 2.060914168  | -1.554508168 | 0.002041939 | 0.003583403 |
| CGA        | 1.772963999  | -1.148412864 | 0.002052236 | 0.003600343 |
| C10orf90   | 1.881323652  | -1.017437168 | 0.002076708 | 0.003638996 |
| IGLV1-36   | -1.21632155  | -1.196894357 | 0.002082718 | 0.003649242 |
| SLITRK5    | 1.134301304  | -2.344088478 | 0.002085272 | 0.003652858 |
| NEFH       | 1.020373171  | -0.00117578  | 0.002114774 | 0.003699904 |
| LINC01727  | -1.256182427 | -1.514860566 | 0.002131296 | 0.00372692  |
| MLIP-AS1   | 1.134638552  | -1.944730309 | 0.002162664 | 0.003778667 |
| SPINT1-AS1 | 1.210971879  | 0.082352168  | 0.002166123 | 0.003784415 |
| LINC01169  | 1.025875956  | -1.313198966 | 0.002176419 | 0.003801513 |
| AP000757.1 | 1.065393547  | -1.577895939 | 0.002192725 | 0.003829098 |
| AL445189.2 | 1.505940957  | -1.98739459  | 0.00220789  | 0.003854075 |
| NLRP2      | 1.248482097  | 0.546009882  | 0.002230562 | 0.003891526 |
| LGALS9C    | 1.338570566  | -0.439383785 | 0.002304052 | 0.004010046 |
| AC010127.1 | 1.464114132  | -1.944825428 | 0.002330063 | 0.004053111 |
| RXRG       | 1.327230596  | 0.919209407  | 0.002404505 | 0.004176108 |
| MYEOV      | 1.585208528  | 2.207363584  | 0.002417008 | 0.004195543 |
| AL137798.1 | 1.24896752   | -0.561514872 | 0.002522769 | 0.004370313 |
| UGT1A8     | 1.340515994  | -1.315332097 | 0.002590906 | 0.00447864  |
| IAPP       | 1.262965856  | -1.181897142 | 0.002592426 | 0.00448023  |
| SYT13      | 1.713616986  | 2.69951602   | 0.002598294 | 0.004488984 |
| EFNA5      | 1.228494485  | 1.397967337  | 0.002606208 | 0.004501266 |
| AC079360.1 | 1.185051904  | -0.6938705   | 0.002611586 | 0.004509183 |
| PDX1       | 1.7176522    | 1.992396197  | 0.002611598 | 0.004509183 |
| AC004540.1 | 1.003279953  | -1.063096296 | 0.002651243 | 0.004569632 |
| DNAJB3     | 1.129947956  | -2.132656996 | 0.00268274  | 0.004619184 |
| SHISA3     | 1.074641849  | 0.473305394  | 0.00269111  | 0.004632527 |
| BMPR1B     | -1.002444884 | -0.688728657 | 0.002758467 | 0.004738997 |
| IGHV3-74   | -1.030815688 | 1.349935984  | 0.002760903 | 0.004742818 |
| PTCHD4     | 1.079560612  | 0.673274259  | 0.002811714 | 0.004821589 |
| AL445183.2 | 1.153679513  | -1.467016443 | 0.002835122 | 0.004857262 |
| AL355512.1 | 1.177297309  | 0.33822636   | 0.002843601 | 0.004871044 |
| IGSF11     | 1.385976982  | -2.442843174 | 0.002851503 | 0.004883832 |
| AC243562.2 | 1.146632392  | -3.097453949 | 0.002907125 | 0.004972246 |
| LINC01587  | 1.446117989  | -1.377336394 | 0.002907712 | 0.004972869 |
| NPPB       | 1.77113594   | -2.715773752 | 0.002965978 | 0.005064765 |
| MALRD1     | 1.151427486  | -2.492043174 | 0.002996193 | 0.0051113   |
| SPESP1     | 1.25508849   | 0.14111709   | 0.003009756 | 0.005132091 |
| CNTN1      | 1.995850733  | 1.859213774  | 0.003076829 | 0.005239672 |
| AC114947.1 | 1.302871067  | -1.672800661 | 0.003131552 | 0.005324757 |
| FBXO40     | 1.89145106   | -1.675328616 | 0.003196362 | 0.005428768 |
| APCDD1L    | 1.624079396  | -2.04533877  | 0.003223078 | 0.005470821 |
| AC005304.2 | -1.065359107 | -2.514562854 | 0.003297403 | 0.005588925 |
| AL021940.1 | 1.612452323  | -2.560784718 | 0.003315142 | 0.005616863 |
| DDX43P3    | 1.416730824  | -2.68091858  | 0.003320486 | 0.005625491 |
| WNK2       | 1.272384742  | 3.656070003  | 0.003325718 | 0.005633929 |
| CHI3L1     | 1.194381209  | 8.979268254  | 0.003404692 | 0.005757689 |
| IGFL1      | 2.61404996   | -2.825065925 | 0.003412272 | 0.0057692   |
| LINC01370  | -1.114844153 | 2.059932733  | 0.003460365 | 0.005846977 |
| LINC02029  | 1.052514189  | -0.527574148 | 0.003471833 | 0.005864582 |
| AC005550.2 | 1.901007447  | 0.442840286  | 0.003540062 | 0.005974423 |
| SLC34A2    | 1.860664427  | 3.950868661  | 0.003559632 | 0.006004732 |
| LINC01182  | 1.251533635  | -1.653535948 | 0.003617354 | 0.006096128 |
| FRMD5      | 1.281301209  | -2.63064898  | 0.003653474 | 0.006150976 |
| AL161431.1 | 2.761143866  | -1.507070538 | 0.003662835 | 0.006165344 |
| MT1B       | 3.607822046  | 4.470177471  | 0.003679982 | 0.006190481 |
| AC110741.1 | 1.900598729  | -2.857819539 | 0.003945005 | 0.00660947  |

|            |              |              |             |             |
|------------|--------------|--------------|-------------|-------------|
| KLK10      | -1.108560905 | -1.09937035  | 0.003995767 | 0.006689509 |
| C1orf116   | 1.10101978   | 2.208891986  | 0.004010447 | 0.00671057  |
| LINC02160  | -1.354898309 | -2.276239655 | 0.004075583 | 0.006815484 |
| PEG3       | 1.258009258  | 4.186074029  | 0.00413983  | 0.006914653 |
| AP000424.1 | 1.002455491  | -1.037273085 | 0.004185547 | 0.00698729  |
| KRT87P     | 1.21898947   | -0.935657855 | 0.004186044 | 0.00698729  |
| AC108860.2 | 1.724676558  | -2.453253359 | 0.004268439 | 0.007114595 |
| TFAP2C     | 1.526416812  | -0.984405818 | 0.004271781 | 0.007119634 |
| ASCL1      | -1.255038788 | 1.736236264  | 0.004336517 | 0.00722     |
| TMEM51-AS1 | 1.011731958  | -1.041282253 | 0.00454354  | 0.007542788 |
| SFTPA2     | 1.731786985  | -2.722261688 | 0.004616198 | 0.007654323 |
| BX470209.2 | 1.563741635  | -2.346717155 | 0.004629922 | 0.007674804 |
| KCNS2      | 1.309016005  | -2.943449207 | 0.004648938 | 0.007702331 |
| RSPO2      | 1.547547116  | -0.052431477 | 0.0046758   | 0.007743969 |
| CHMP1B2P   | 1.637508993  | -2.276970961 | 0.004684162 | 0.007756669 |
| ZNF812P    | 1.069770458  | -0.36118465  | 0.004699226 | 0.007779887 |
| PADI1      | 1.931239806  | 2.039693469  | 0.004702314 | 0.007784425 |
| TRPA1      | 1.268092325  | -2.066805532 | 0.004703626 | 0.00778602  |
| NTNG1      | 1.791536207  | -2.885193083 | 0.004749138 | 0.007854965 |
| FOXE1      | 1.893524024  | -2.381032234 | 0.00483247  | 0.007980405 |
| ILDR1      | 1.055598232  | 0.763013371  | 0.004834348 | 0.007982329 |
| BEX1       | 1.687214863  | 2.460847763  | 0.004868181 | 0.00803582  |
| LMX1B      | 1.60806805   | -1.193173748 | 0.004892693 | 0.008072114 |
| SOST       | 2.403907236  | -2.780772274 | 0.004893115 | 0.008072214 |
| PRSS3      | 1.335327045  | 3.34908174   | 0.00498456  | 0.008212778 |
| AC007663.2 | 1.119137176  | -2.145524171 | 0.0050085   | 0.008249185 |
| EPHA6      | 1.765417529  | -1.855323325 | 0.005054087 | 0.008315699 |
| PDZD3      | 1.094832256  | -2.034879327 | 0.005112069 | 0.008402449 |
| SEZ6L      | 1.515153347  | -0.642965096 | 0.005117168 | 0.008410212 |
| HRNR       | 1.008754786  | -2.820372192 | 0.005154746 | 0.008467034 |
| SDR16C5    | 2.142192051  | -1.921298722 | 0.005204588 | 0.008541968 |
| AL049836.2 | 2.593044459  | -2.449444265 | 0.005242938 | 0.008598803 |
| LPO        | 1.298859172  | -3.121536597 | 0.005328538 | 0.008728113 |
| AC090152.1 | 1.104653393  | 0.264658015  | 0.005428867 | 0.008878803 |
| SFRP5      | -1.294443622 | 3.395246404  | 0.005469927 | 0.008941381 |
| LYPD6      | 1.005852416  | -0.190671527 | 0.005613371 | 0.009157128 |
| PRAMEF2    | 2.016853734  | -1.903495512 | 0.005750462 | 0.009365744 |
| AC023154.1 | 1.216974744  | -2.692240579 | 0.005800885 | 0.009439622 |
| ATP10B     | 1.565764782  | 0.386294929  | 0.00581829  | 0.009466568 |
| LCN15      | 1.887279379  | -1.664488459 | 0.005951278 | 0.009666074 |
| ART3       | 1.136046891  | -2.002861868 | 0.006005298 | 0.009748153 |
| DPP10-AS1  | 2.383768903  | -0.772220484 | 0.006013001 | 0.009759334 |
| LAMA1      | 1.322661197  | 1.10857932   | 0.00624003  | 0.010106455 |
| TEX15      | 1.827898688  | -1.571610304 | 0.006358376 | 0.010285473 |
| IGLV4-60   | -1.11673338  | -0.975689255 | 0.006363033 | 0.010292263 |
| C6orf132   | 1.074001222  | 1.738747864  | 0.006496493 | 0.010490692 |
| A4GNT      | 1.636591147  | -1.135721519 | 0.00691343  | 0.011120633 |
| AL008723.1 | 1.048196791  | -2.652964704 | 0.007009407 | 0.011266917 |
| AC104031.1 | 1.013403145  | -1.323211233 | 0.0071165   | 0.011427565 |
| MAB21L1    | 1.254918378  | -2.79534131  | 0.007246597 | 0.01162146  |
| GJB4       | 1.480172843  | -2.578405277 | 0.007566827 | 0.012107248 |
| AC097652.1 | 1.461170725  | -3.058467109 | 0.007762488 | 0.012399919 |
| CNTN5      | 1.231099597  | -1.971795512 | 0.008209289 | 0.013055856 |
| PKP3       | 1.305145978  | 1.701108817  | 0.008384778 | 0.013320748 |
| OSTN       | 1.333245225  | -2.899373638 | 0.009104231 | 0.014375947 |
| PCAT14     | 1.469904852  | -2.477777299 | 0.009178594 | 0.014486213 |
| KCNH1      | 1.002595361  | -2.748505858 | 0.009456055 | 0.014898897 |
| CALB1      | 1.092692879  | -1.086432782 | 0.009556447 | 0.015042245 |

|             |              |              |             |             |
|-------------|--------------|--------------|-------------|-------------|
| AC026765.2  | 1.067212803  | 0.119569108  | 0.009692109 | 0.01523863  |
| WT1         | 1.286856528  | -0.853185109 | 0.009846039 | 0.015454586 |
| UMODL1      | 1.276102244  | -1.580457738 | 0.009862183 | 0.015476669 |
| LINC01133   | 1.086712835  | -2.579213178 | 0.010111707 | 0.015833819 |
| MYH4        | 2.068038466  | 5.779859307  | 0.010125698 | 0.015851291 |
| FAM83A      | 1.073475536  | 0.183719943  | 0.010132396 | 0.015859557 |
| LHX9        | 1.011081437  | 1.058234641  | 0.010196387 | 0.015955252 |
| TCP10L2     | 1.187743656  | -2.592538589 | 0.010340654 | 0.016170822 |
| AP000439.3  | 1.842421832  | -0.120811329 | 0.010362429 | 0.016201478 |
| PAX9        | 1.170631728  | -2.573181154 | 0.010678676 | 0.016666809 |
| CYP2A7P2    | 1.363201992  | -2.72107975  | 0.010733873 | 0.016742448 |
| ALKAL1      | -1.053447601 | -2.210348374 | 0.010854494 | 0.016922331 |
| AP003071.4  | 1.000588451  | -0.989173437 | 0.011289528 | 0.017551638 |
| RASSF10     | 1.485411669  | -2.830465468 | 0.011364527 | 0.017665783 |
| FAM19A5     | 1.098233256  | 2.6835271    | 0.011709718 | 0.018173333 |
| DSG4        | 1.092050343  | -2.935055385 | 0.012166178 | 0.018846458 |
| PCYT1B      | 1.075530968  | -1.508522324 | 0.012608833 | 0.019472849 |
| FAM167A     | 1.021150314  | 0.953695945  | 0.012681256 | 0.019573889 |
| AL358334.2  | 1.21416448   | -2.51078528  | 0.01297081  | 0.019990486 |
| CSAG3       | 1.586995704  | -0.618653561 | 0.012989435 | 0.020016432 |
| LINC00992   | 1.079656888  | -1.067800084 | 0.013332782 | 0.020515852 |
| WFDC2       | 1.179161242  | 2.733340805  | 0.013739723 | 0.021101401 |
| IL13        | 1.403528124  | -2.015131551 | 0.013790874 | 0.021174714 |
| TFF1        | 1.846604075  | 1.317661783  | 0.013843002 | 0.021249806 |
| PSPHP1      | 1.264087031  | 2.549945084  | 0.013859989 | 0.021272526 |
| WSCD2       | 1.012438836  | -2.25842846  | 0.01399596  | 0.021458107 |
| LINC00524   | 1.549959913  | -2.583427385 | 0.014044904 | 0.02152577  |
| SFRP2       | 1.581737586  | 0.554411717  | 0.014110677 | 0.021622134 |
| TUBBP5      | 1.122714414  | -0.115600558 | 0.014219374 | 0.021778253 |
| CRISP3      | 1.870011678  | 1.460188201  | 0.014227898 | 0.021789817 |
| LGALS7B     | 1.385156904  | -2.857658601 | 0.014310487 | 0.02190131  |
| FAM153B     | 1.053744322  | -0.80208939  | 0.014373915 | 0.021987855 |
| AL645608.2  | 1.444835282  | -2.775884155 | 0.014655644 | 0.022391262 |
| AL049629.1  | 1.248057309  | -2.336421763 | 0.014936609 | 0.022786298 |
| C1orf140    | 1.148408566  | -1.647180627 | 0.015508891 | 0.023606221 |
| AC007608.1  | 1.186959976  | -2.736595179 | 0.015599062 | 0.023732168 |
| RBM46       | 1.050249981  | -2.207093199 | 0.015612414 | 0.023750868 |
| STMN2       | 1.260610586  | 1.283332968  | 0.015735556 | 0.023917062 |
| EEF1DP5     | 1.875151562  | -1.836364556 | 0.015747117 | 0.023933008 |
| LINC01721   | 1.265492834  | -2.524803817 | 0.015798935 | 0.024000351 |
| NEXMIF      | 1.114838424  | -2.517609494 | 0.01662422  | 0.025143094 |
| AC006262.1  | 1.239793897  | -2.868858515 | 0.016958147 | 0.025604868 |
| LINC00940   | 1.072593105  | -2.843485345 | 0.017247428 | 0.026010056 |
| ANKRD22     | 1.001924226  | 1.652342273  | 0.017968668 | 0.027021235 |
| AL365357.1  | 1.083670722  | 0.837244553  | 0.018155528 | 0.027283896 |
| CACNG7      | 1.836100649  | -3.158989359 | 0.018209963 | 0.027356514 |
| ANGPT4      | 1.060214607  | -1.417802771 | 0.018463165 | 0.027708989 |
| TRIM40      | 1.070726714  | -1.280971996 | 0.018573686 | 0.027862896 |
| SORCS1      | 1.336393839  | -1.178317714 | 0.019679    | 0.029358423 |
| MS4A8       | 1.619115196  | -0.815526237 | 0.01990102  | 0.029665911 |
| ROBO2       | 1.003174481  | 0.922338111  | 0.019967169 | 0.02975857  |
| PITPNM2-AS1 | 1.713389731  | -0.808721808 | 0.022466111 | 0.033224007 |
| CCK         | 1.60829114   | -1.940106966 | 0.023090038 | 0.03408226  |
| PPDPFL      | 1.868577073  | -3.007949023 | 0.023531997 | 0.034683383 |
| FGF9        | 1.124587745  | -2.657039658 | 0.02440241  | 0.035885897 |
| TMPRSS4     | 1.005689907  | -0.334627151 | 0.025603769 | 0.037504702 |
| H19         | 1.030842058  | 9.130672572  | 0.025682094 | 0.037614508 |
| DCAF12L1    | 1.781156197  | -2.88349549  | 0.025805845 | 0.037781132 |

|            |             |              |             |             |
|------------|-------------|--------------|-------------|-------------|
| HS6ST3     | 1.254170601 | -2.651140533 | 0.026477038 | 0.038692686 |
| PAK5       | 1.775664042 | -0.146895127 | 0.027374125 | 0.039902023 |
| FMR1NB     | 1.150111034 | -2.863417442 | 0.027434834 | 0.039980097 |
| AC087379.2 | 1.253166763 | -0.368418764 | 0.027456246 | 0.040006089 |
| ZFP57      | 1.082902799 | -1.991082154 | 0.027789337 | 0.040444024 |
| LINC00348  | 1.227883613 | -1.169373223 | 0.02796815  | 0.040672518 |
| MMP3       | 1.324082838 | -1.458154983 | 0.027982559 | 0.040688182 |
| CLCA1      | 2.410729227 | -2.603818584 | 0.028513948 | 0.041407034 |
| IGKV1D-13  | -1.01691632 | -1.141828571 | 0.028606158 | 0.041535547 |
| AL121949.2 | 1.112760873 | -2.748245003 | 0.029162435 | 0.042302074 |
| KIF25-AS1  | 1.263311904 | -2.37400018  | 0.031115576 | 0.044882092 |
| UCA1       | 1.214771461 | 1.765212826  | 0.032268782 | 0.046422812 |
| LIPM       | 1.110705875 | -1.952053859 | 0.03267548  | 0.046962607 |
| ATP12A     | 1.68958011  | -1.352784451 | 0.033452813 | 0.047984275 |
| KCNS1      | 1.003475519 | -1.886408918 | 0.034073253 | 0.04876481  |

al samples.

Table S2. Differentially expressed miRNAs between hepatocellular carcinoma samples and normal sampl

| id               | logFC        | logCPM       | PValue   | FDR      |
|------------------|--------------|--------------|----------|----------|
| hsa-miR-424-5p   | -2.315714938 | 7.414355076  | 6.40E-87 | 5.25E-84 |
| hsa-miR-139-3p   | -1.918062986 | 5.028321644  | 7.33E-42 | 3.01E-39 |
| hsa-miR-1258     | -3.439255981 | 1.632560493  | 1.23E-37 | 3.36E-35 |
| hsa-miR-21-5p    | 1.807758583  | 17.84339206  | 4.69E-36 | 9.62E-34 |
| hsa-miR-93-5p    | 1.662610238  | 12.56503952  | 4.42E-35 | 7.24E-33 |
| hsa-miR-589-5p   | 1.518025628  | 6.643475824  | 1.76E-32 | 2.41E-30 |
| hsa-miR-10b-5p   | 3.561733274  | 14.23129048  | 7.50E-32 | 8.78E-30 |
| hsa-miR-4746-5p  | 2.473524666  | 1.937821615  | 5.16E-29 | 5.29E-27 |
| hsa-miR-10b-3p   | 3.507086444  | 3.118445211  | 3.20E-27 | 2.91E-25 |
| hsa-miR-500a-3p  | 1.541741589  | 8.599323444  | 3.64E-27 | 2.98E-25 |
| hsa-miR-224-5p   | 3.325447897  | 7.481451851  | 9.18E-27 | 6.84E-25 |
| hsa-miR-424-3p   | -1.359153958 | 2.037153894  | 1.12E-26 | 7.64E-25 |
| hsa-miR-7706     | 1.986090527  | 1.455603669  | 2.09E-25 | 1.32E-23 |
| hsa-miR-490-3p   | -3.316506322 | 1.002453779  | 2.92E-25 | 1.71E-23 |
| hsa-miR-183-5p   | 3.873938071  | 11.86545899  | 3.96E-24 | 2.03E-22 |
| hsa-miR-532-5p   | 1.36802815   | 10.56578218  | 4.42E-24 | 2.13E-22 |
| hsa-miR-452-5p   | 2.444198694  | 8.04648455   | 3.06E-22 | 1.39E-20 |
| hsa-miR-96-5p    | 3.767523025  | 3.785121139  | 4.49E-22 | 1.94E-20 |
| hsa-miR-501-3p   | 1.380790671  | 5.964839052  | 5.86E-22 | 2.40E-20 |
| hsa-miR-103a-3p  | 1.048798025  | 14.80699357  | 7.33E-22 | 2.86E-20 |
| hsa-miR-182-5p   | 3.371304562  | 13.25715038  | 9.25E-22 | 3.45E-20 |
| hsa-miR-139-5p   | -1.44580026  | 7.222515522  | 1.21E-21 | 4.32E-20 |
| hsa-miR-450a-5p  | -1.192160603 | 3.386537736  | 1.06E-20 | 3.62E-19 |
| hsa-miR-221-3p   | 1.517457767  | 7.045260645  | 1.18E-20 | 3.88E-19 |
| hsa-miR-1307-3p  | 1.101445565  | 10.61210118  | 2.77E-20 | 8.72E-19 |
| hsa-miR-511-5p   | -1.243529964 | 3.898953455  | 3.08E-20 | 9.35E-19 |
| hsa-miR-660-5p   | 1.270937157  | 6.459782638  | 7.67E-20 | 2.17E-18 |
| hsa-miR-1248     | -1.912411134 | -0.237798332 | 3.93E-19 | 9.77E-18 |
| hsa-miR-1180-3p  | 1.657882174  | 4.578617057  | 3.93E-19 | 9.77E-18 |
| hsa-miR-1269a    | 5.744145629  | 9.294102373  | 5.17E-19 | 1.25E-17 |
| hsa-miR-101-3p   | -1.06735723  | 14.53583404  | 6.24E-19 | 1.46E-17 |
| hsa-miR-222-3p   | 1.433392321  | 4.94811969   | 6.66E-19 | 1.52E-17 |
| hsa-miR-767-5p   | 9.061032031  | 4.696567526  | 1.41E-18 | 3.14E-17 |
| hsa-miR-33b-5p   | -1.607996904 | 3.236724084  | 1.55E-18 | 3.35E-17 |
| hsa-miR-105-5p   | 9.000179542  | 5.272757416  | 1.94E-18 | 4.08E-17 |
| hsa-miR-1301-3p  | 1.519212081  | 3.404428477  | 5.84E-18 | 1.11E-16 |
| hsa-miR-877-5p   | 1.735869074  | 1.181338396  | 8.30E-18 | 1.52E-16 |
| hsa-miR-452-3p   | 2.331659593  | 3.514266566  | 8.32E-18 | 1.52E-16 |
| hsa-miR-144-3p   | -1.83319133  | 4.222446312  | 1.16E-17 | 2.06E-16 |
| hsa-miR-34a-5p   | 1.363171694  | 8.576777831  | 2.28E-17 | 3.89E-16 |
| hsa-miR-188-5p   | 1.476018628  | 1.966035854  | 2.69E-17 | 4.50E-16 |
| hsa-miR-542-5p   | -1.160766568 | 1.291611015  | 3.02E-17 | 4.95E-16 |
| hsa-miR-195-5p   | -1.2795388   | 5.160103415  | 3.60E-17 | 5.78E-16 |
| hsa-miR-1266-5p  | 1.894033382  | 2.873182024  | 5.69E-17 | 8.97E-16 |
| hsa-miR-326      | -1.281589575 | 2.365120963  | 1.32E-16 | 2.04E-15 |
| hsa-miR-891a-5p  | 6.404354024  | 3.958619451  | 2.20E-16 | 3.35E-15 |
| hsa-miR-335-5p   | -1.186201577 | 3.544988437  | 3.18E-16 | 4.74E-15 |
| hsa-miR-501-5p   | 1.435658675  | 2.016649308  | 3.69E-16 | 5.40E-15 |
| hsa-miR-34c-5p   | 3.981863393  | 1.585777545  | 3.98E-16 | 5.73E-15 |
| hsa-miR-6503-5p  | -1.428969697 | -0.42233971  | 6.42E-16 | 9.08E-15 |
| hsa-miR-9-5p     | 3.536816791  | 10.27010249  | 7.38E-16 | 1.03E-14 |
| hsa-let-7c-3p    | -1.350287261 | 3.605797414  | 8.34E-16 | 1.14E-14 |
| hsa-miR-130a-3p  | -1.036505845 | 5.869670124  | 1.72E-15 | 2.27E-14 |
| hsa-miR-589-3p   | 1.39103194   | 1.155940825  | 2.01E-15 | 2.62E-14 |
| hsa-miR-30c-1-3p | -1.053105845 | 1.106272476  | 2.22E-15 | 2.84E-14 |
| hsa-miR-190b-5p  | 3.069643796  | 0.656046624  | 2.60E-15 | 3.26E-14 |

|                   |              |              |          |          |
|-------------------|--------------|--------------|----------|----------|
| hsa-miR-3200-3p   | 2.457239258  | 2.127983758  | 2.79E-15 | 3.42E-14 |
| hsa-miR-3144-3p   | 3.63433053   | 0.088233156  | 3.14E-15 | 3.79E-14 |
| hsa-miR-196b-5p   | 3.369565806  | 6.442209497  | 3.65E-15 | 4.34E-14 |
| hsa-miR-30d-5p    | 1.2071081    | 13.91959646  | 5.00E-15 | 5.86E-14 |
| hsa-miR-500b-5p   | 1.133082111  | 2.635609634  | 6.66E-15 | 7.70E-14 |
| hsa-miR-500a-5p   | 1.132680939  | 2.635256327  | 6.91E-15 | 7.87E-14 |
| hsa-miR-3677-3p   | 1.605196162  | 2.039417373  | 7.22E-15 | 8.12E-14 |
| hsa-miR-671-5p    | 1.164725651  | 1.929483175  | 8.34E-15 | 9.24E-14 |
| hsa-miR-4652-5p   | 6.904568474  | 1.928900761  | 9.62E-15 | 1.05E-13 |
| hsa-miR-4661-5p   | 1.890560756  | 2.914598015  | 1.01E-14 | 1.09E-13 |
| hsa-miR-421       | 1.379539577  | 1.877147933  | 1.30E-14 | 1.38E-13 |
| hsa-miR-217-5p    | 4.195259407  | 11.48136004  | 1.36E-14 | 1.43E-13 |
| hsa-miR-301a-3p   | 1.32863315   | 2.887646943  | 2.97E-14 | 3.08E-13 |
| hsa-miR-18a-5p    | 1.610928955  | 4.440739064  | 3.93E-14 | 4.03E-13 |
| hsa-miR-454-3p    | 1.046426428  | 2.951150247  | 5.01E-14 | 5.08E-13 |
| hsa-miR-19a-3p    | 1.512914812  | 5.94875708   | 6.83E-14 | 6.83E-13 |
| hsa-miR-1251-5p   | 5.023086832  | 1.216735423  | 6.98E-14 | 6.90E-13 |
| hsa-miR-3127-5p   | 1.184384076  | 1.799776504  | 7.72E-14 | 7.53E-13 |
| hsa-miR-500b-3p   | 1.303345311  | 1.287416503  | 9.90E-14 | 9.33E-13 |
| hsa-miR-362-3p    | 1.075609443  | 2.143907012  | 1.03E-13 | 9.63E-13 |
| hsa-miR-135a-5p   | 3.857805209  | 2.709352217  | 1.31E-13 | 1.19E-12 |
| hsa-miR-3662      | 2.771488047  | 0.357225591  | 1.79E-13 | 1.62E-12 |
| hsa-miR-1269b     | 6.526606368  | 6.668463132  | 3.72E-13 | 3.30E-12 |
| hsa-let-7c-5p     | -1.098665593 | 11.39613058  | 3.74E-13 | 3.30E-12 |
| hsa-miR-103a-2-5p | 1.377026167  | 0.94461435   | 3.84E-13 | 3.35E-12 |
| hsa-miR-122b-5p   | 2.36151502   | 1.667460704  | 4.35E-13 | 3.76E-12 |
| hsa-miR-224-3p    | 1.907861473  | 2.819248935  | 5.09E-13 | 4.30E-12 |
| hsa-miR-3614-5p   | -1.243476167 | 1.743324033  | 7.09E-13 | 5.93E-12 |
| hsa-miR-20a-5p    | 1.248336334  | 9.526190788  | 7.59E-13 | 6.29E-12 |
| hsa-miR-369-5p    | -1.601263391 | 2.431395485  | 1.14E-12 | 9.20E-12 |
| hsa-miR-184       | 4.686484701  | 4.262140302  | 1.96E-12 | 1.56E-11 |
| hsa-miR-581       | 1.344128365  | 0.167919996  | 2.09E-12 | 1.65E-11 |
| hsa-miR-3923      | 7.505022881  | 3.971641646  | 2.97E-12 | 2.29E-11 |
| hsa-miR-17-5p     | 1.136574953  | 9.70355291   | 3.32E-12 | 2.54E-11 |
| hsa-miR-4664-3p   | 2.410461788  | -0.257869032 | 3.62E-12 | 2.75E-11 |
| hsa-miR-34c-3p    | 2.812217599  | 0.974084845  | 4.48E-12 | 3.37E-11 |
| hsa-miR-4326      | 1.567643475  | 2.550017921  | 4.71E-12 | 3.51E-11 |
| hsa-miR-214-3p    | -1.42753586  | 2.015843983  | 5.82E-12 | 4.30E-11 |
| hsa-miR-552-5p    | 5.188071887  | 5.44156116   | 5.95E-12 | 4.36E-11 |
| hsa-miR-122-3p    | -1.083456212 | 7.651470288  | 7.10E-12 | 5.15E-11 |
| hsa-miR-199b-3p   | -1.311521279 | 10.15030516  | 8.45E-12 | 6.08E-11 |
| hsa-miR-199a-3p   | -1.308461594 | 10.1554523   | 9.13E-12 | 6.51E-11 |
| hsa-miR-512-3p    | 7.613974976  | 4.61901994   | 1.55E-11 | 1.10E-10 |
| hsa-miR-216b-5p   | 4.056934361  | 5.903327434  | 1.64E-11 | 1.15E-10 |
| hsa-miR-767-3p    | 5.271334557  | 0.349714661  | 1.96E-11 | 1.36E-10 |
| hsa-miR-552-3p    | 5.346802378  | 4.70476037   | 2.98E-11 | 2.05E-10 |
| hsa-miR-372-3p    | 7.317169491  | 5.816901221  | 3.91E-11 | 2.67E-10 |
| hsa-miR-216a-5p   | 3.624188652  | 5.623477527  | 4.47E-11 | 3.03E-10 |
| hsa-miR-1270      | 2.134343038  | 1.359877628  | 4.74E-11 | 3.19E-10 |
| hsa-miR-33b-3p    | -1.338521537 | 0.234140916  | 5.32E-11 | 3.52E-10 |
| hsa-miR-183-3p    | 2.761593157  | -0.361881993 | 5.51E-11 | 3.62E-10 |
| hsa-miR-6502-5p   | -1.23375954  | -0.482315381 | 6.51E-11 | 4.24E-10 |
| hsa-miR-301b-3p   | 1.725925433  | 0.724532467  | 7.29E-11 | 4.71E-10 |
| hsa-miR-10a-3p    | -1.095042152 | 0.875866878  | 8.02E-11 | 5.03E-10 |
| hsa-miR-196a-5p   | 4.554700127  | 4.093602103  | 8.03E-11 | 5.03E-10 |
| hsa-miR-520a-3p   | 7.516141424  | 5.205609598  | 1.01E-10 | 6.26E-10 |
| hsa-miR-519a-5p   | 7.341092902  | 4.952006975  | 1.03E-10 | 6.31E-10 |
| hsa-miR-502-5p    | 1.243973263  | 1.034981882  | 1.03E-10 | 6.31E-10 |

|                   |              |              |          |          |
|-------------------|--------------|--------------|----------|----------|
| hsa-miR-520c-3p   | 7.243349789  | 2.261766499  | 1.04E-10 | 6.31E-10 |
| hsa-miR-520b-3p   | 7.242444503  | 2.260902882  | 1.05E-10 | 6.31E-10 |
| hsa-miR-34a-3p    | 1.174174066  | 0.62551281   | 1.07E-10 | 6.40E-10 |
| hsa-miR-2114-5p   | 3.202602487  | 1.563328681  | 1.31E-10 | 7.79E-10 |
| hsa-miR-34b-3p    | 3.427508626  | -0.040700851 | 1.57E-10 | 9.26E-10 |
| hsa-miR-643       | 1.587681064  | -0.295170091 | 1.85E-10 | 1.07E-09 |
| hsa-miR-130b-3p   | 1.186668559  | 4.906754717  | 1.96E-10 | 1.13E-09 |
| hsa-miR-130a-5p   | -1.060155529 | 0.007101334  | 3.39E-10 | 1.88E-09 |
| hsa-miR-765       | 1.765794302  | -0.293725733 | 3.55E-10 | 1.94E-09 |
| hsa-miR-939-5p    | 1.15406053   | 0.425690172  | 4.54E-10 | 2.43E-09 |
| hsa-miR-1226-3p   | 1.609768767  | 0.832546999  | 5.11E-10 | 2.70E-09 |
| hsa-miR-4742-3p   | 1.219310336  | 0.428277744  | 5.87E-10 | 3.08E-09 |
| hsa-miR-219b-3p   | 1.45195492   | -0.258783579 | 5.96E-10 | 3.11E-09 |
| hsa-miR-520f-3p   | 7.538893986  | 2.986876517  | 9.24E-10 | 4.76E-09 |
| hsa-miR-937-3p    | 1.586894695  | 1.700792093  | 1.40E-09 | 7.11E-09 |
| hsa-miR-520h      | 6.791320811  | 2.14177493   | 1.45E-09 | 7.33E-09 |
| hsa-miR-526b-5p   | 6.440230522  | 5.592708303  | 1.55E-09 | 7.79E-09 |
| hsa-miR-519c-3p   | 6.790869711  | 2.265532253  | 1.60E-09 | 7.99E-09 |
| hsa-miR-216a-3p   | 3.584024345  | 3.030818448  | 1.67E-09 | 8.28E-09 |
| hsa-miR-520a-5p   | 7.017726451  | 3.344987937  | 1.76E-09 | 8.63E-09 |
| hsa-miR-541-3p    | 3.411096145  | 1.362437142  | 1.95E-09 | 9.52E-09 |
| hsa-miR-5003-3p   | 1.658758123  | -0.353041118 | 2.39E-09 | 1.16E-08 |
| hsa-miR-518b      | 6.538667983  | 3.874428087  | 2.50E-09 | 1.21E-08 |
| hsa-miR-518f-5p   | 7.239262549  | 3.253733989  | 2.69E-09 | 1.29E-08 |
| hsa-miR-520g-3p   | 6.982233599  | 3.023733235  | 3.07E-09 | 1.46E-08 |
| hsa-miR-520e-3p   | 6.388028191  | 1.682970317  | 3.55E-09 | 1.68E-08 |
| hsa-miR-548d-3p   | 1.730960959  | -0.383882682 | 3.95E-09 | 1.86E-08 |
| hsa-miR-516b-5p   | 6.687919808  | 3.463421177  | 4.63E-09 | 2.15E-08 |
| hsa-miR-5010-3p   | 1.06494234   | 0.467871759  | 4.79E-09 | 2.21E-08 |
| hsa-miR-7974      | 2.288309724  | -0.424976365 | 5.36E-09 | 2.44E-08 |
| hsa-miR-5586-5p   | 1.186525529  | 1.891308142  | 6.15E-09 | 2.77E-08 |
| hsa-miR-516a-5p   | 5.926509816  | 4.028955218  | 7.39E-09 | 3.31E-08 |
| hsa-miR-362-5p    | 1.00413046   | 4.736130014  | 7.66E-09 | 3.41E-08 |
| hsa-miR-4791      | -1.045762406 | -0.369355035 | 8.51E-09 | 3.77E-08 |
| hsa-miR-548y      | 3.860193694  | -0.332035539 | 9.48E-09 | 4.13E-08 |
| hsa-miR-1323      | 6.074791429  | 2.50713321   | 1.00E-08 | 4.35E-08 |
| hsa-miR-454-5p    | 1.075126966  | -0.042386407 | 1.10E-08 | 4.73E-08 |
| hsa-miR-519d-3p   | 6.280800143  | 2.514844093  | 1.11E-08 | 4.76E-08 |
| hsa-miR-338-3p    | 1.377165705  | 9.274413003  | 1.26E-08 | 5.35E-08 |
| hsa-miR-200c-3p   | 2.666399193  | 8.4472835    | 1.33E-08 | 5.61E-08 |
| hsa-miR-3682-3p   | 1.046255915  | 0.991214433  | 1.36E-08 | 5.71E-08 |
| hsa-miR-376a-2-5p | -1.474472089 | -0.405626337 | 1.39E-08 | 5.79E-08 |
| hsa-miR-9-3p      | 2.665460901  | 1.639408239  | 1.79E-08 | 7.36E-08 |
| hsa-miR-6783-3p   | 1.900848298  | -0.671109287 | 2.15E-08 | 8.78E-08 |
| hsa-miR-515-5p    | 6.013132692  | 1.597490166  | 2.44E-08 | 9.89E-08 |
| hsa-miR-519b-3p   | 5.864403411  | 0.966980275  | 2.72E-08 | 1.09E-07 |
| hsa-miR-4536-3p   | -1.121924643 | -0.65977642  | 2.90E-08 | 1.15E-07 |
| hsa-miR-3677-5p   | 1.284976979  | 0.574296205  | 2.90E-08 | 1.15E-07 |
| hsa-miR-525-5p    | 6.269724332  | 3.227341042  | 2.98E-08 | 1.18E-07 |
| hsa-miR-512-5p    | 6.106534351  | 1.532341351  | 3.04E-08 | 1.19E-07 |
| hsa-miR-520d-3p   | 5.904450123  | 1.745527936  | 3.44E-08 | 1.33E-07 |
| hsa-miR-760       | 1.626696753  | -0.046533168 | 3.44E-08 | 1.33E-07 |
| hsa-miR-518f-3p   | 5.700764857  | 1.226137227  | 3.74E-08 | 1.44E-07 |
| hsa-miR-498-5p    | 5.994932946  | 1.469163259  | 4.51E-08 | 1.73E-07 |
| hsa-miR-431-3p    | 2.109378198  | 4.541940167  | 4.53E-08 | 1.73E-07 |
| hsa-miR-137-3p    | 3.941549782  | 0.495595407  | 4.55E-08 | 1.73E-07 |
| hsa-miR-2114-3p   | 2.790448723  | 0.430612424  | 5.10E-08 | 1.93E-07 |
| hsa-miR-1292-5p   | 1.196373525  | -0.187158197 | 6.13E-08 | 2.29E-07 |



|                  |              |              |          |          |
|------------------|--------------|--------------|----------|----------|
| hsa-miR-615-3p   | 3.89746622   | -0.040639046 | 6.19E-08 | 2.31E-07 |
| hsa-miR-1276     | 1.609854338  | -0.462145665 | 7.06E-08 | 2.61E-07 |
| hsa-miR-466      | 5.229687037  | 0.869401927  | 7.13E-08 | 2.62E-07 |
| hsa-miR-517-5p   | 6.663367276  | 3.047269209  | 7.18E-08 | 2.63E-07 |
| hsa-miR-522-3p   | 5.878398919  | 1.655735808  | 7.56E-08 | 2.75E-07 |
| hsa-miR-518c-5p  | 5.895496678  | 3.430341126  | 8.05E-08 | 2.91E-07 |
| hsa-miR-20b-5p   | 1.3777977    | 4.300458216  | 8.38E-08 | 3.01E-07 |
| hsa-miR-6514-5p  | 1.424729242  | -0.555330993 | 8.52E-08 | 3.05E-07 |
| hsa-miR-548x-3p  | 3.579647364  | -0.505796793 | 8.81E-08 | 3.14E-07 |
| hsa-miR-524-5p   | 5.002139273  | 0.487077096  | 1.14E-07 | 4.00E-07 |
| hsa-miR-6844     | 2.09262335   | -0.57694252  | 1.15E-07 | 4.00E-07 |
| hsa-miR-653-5p   | 1.576262647  | 3.812615373  | 1.26E-07 | 4.36E-07 |
| hsa-miR-1229-3p  | 1.409849039  | 0.088526109  | 1.35E-07 | 4.65E-07 |
| hsa-miR-509-3p   | 2.789319038  | 2.927332295  | 1.37E-07 | 4.69E-07 |
| hsa-miR-146b-5p  | 1.160793083  | 10.67769925  | 1.41E-07 | 4.83E-07 |
| hsa-miR-518e-3p  | 5.605976314  | 2.237580851  | 1.56E-07 | 5.31E-07 |
| hsa-miR-518a-5p  | 5.518171429  | 1.331957531  | 1.58E-07 | 5.34E-07 |
| hsa-miR-527      | 5.44739177   | 1.272255002  | 1.81E-07 | 6.07E-07 |
| hsa-miR-5187-5p  | 1.117966635  | 0.211272125  | 2.14E-07 | 7.14E-07 |
| hsa-miR-431-5p   | 2.169733895  | 2.875289701  | 2.44E-07 | 8.05E-07 |
| hsa-miR-518a-3p  | 5.464166037  | 1.777373696  | 2.63E-07 | 8.64E-07 |
| hsa-miR-508-3p   | 2.473662313  | 4.571553543  | 3.02E-07 | 9.68E-07 |
| hsa-miR-1295a    | 2.170627979  | 1.510231487  | 3.19E-07 | 1.02E-06 |
| hsa-miR-523-3p   | 5.332491757  | 1.538576919  | 3.29E-07 | 1.05E-06 |
| hsa-miR-18a-3p   | 1.19256297   | 1.14368575   | 3.30E-07 | 1.05E-06 |
| hsa-miR-517c-3p  | 5.169966847  | 0.934493603  | 3.47E-07 | 1.09E-06 |
| hsa-miR-1283     | 4.889439485  | 0.753096585  | 3.69E-07 | 1.16E-06 |
| hsa-miR-942-3p   | 1.309667924  | -0.213481814 | 3.90E-07 | 1.22E-06 |
| hsa-miR-3189-3p  | 2.370899679  | -0.387548573 | 3.92E-07 | 1.22E-06 |
| hsa-miR-514a-3p  | 2.570601869  | 3.786268565  | 4.22E-07 | 1.30E-06 |
| hsa-miR-525-3p   | 5.029018248  | 0.877925138  | 4.47E-07 | 1.36E-06 |
| hsa-miR-92a-1-5p | 1.039330534  | 2.197814681  | 5.01E-07 | 1.51E-06 |
| hsa-miR-548f-3p  | 4.418411287  | 0.146686257  | 5.13E-07 | 1.54E-06 |
| hsa-miR-519a-3p  | 5.138347208  | 1.724134166  | 5.39E-07 | 1.61E-06 |
| hsa-miR-3691-5p  | 1.251409595  | -0.286781902 | 6.19E-07 | 1.84E-06 |
| hsa-miR-4664-5p  | 1.452649223  | -0.307422393 | 6.62E-07 | 1.96E-06 |
| hsa-miR-518c-3p  | 5.221745303  | 1.981999701  | 7.00E-07 | 2.06E-06 |
| hsa-miR-6716-3p  | 1.275694965  | -0.375807521 | 7.05E-07 | 2.07E-06 |
| hsa-miR-154-3p   | 2.150103843  | 2.709541589  | 7.86E-07 | 2.27E-06 |
| hsa-miR-141-3p   | 2.403761063  | 5.255506089  | 8.04E-07 | 2.31E-06 |
| hsa-miR-515-3p   | 5.353453772  | 1.4513257    | 8.21E-07 | 2.36E-06 |
| hsa-miR-373-3p   | 5.000697193  | 2.569551192  | 8.90E-07 | 2.54E-06 |
| hsa-miR-526b-3p  | 4.331144332  | -0.101562202 | 1.06E-06 | 3.01E-06 |
| hsa-miR-6715b-3p | 2.161921034  | 2.312979101  | 1.11E-06 | 3.14E-06 |
| hsa-miR-337-5p   | -1.346687613 | -0.498731491 | 1.27E-06 | 3.57E-06 |
| hsa-miR-3117-3p  | 1.846402875  | -0.182527916 | 1.44E-06 | 4.02E-06 |
| hsa-miR-7705     | 1.053205079  | 0.256617925  | 1.68E-06 | 4.64E-06 |
| hsa-miR-205-5p   | 4.076654197  | 3.314129002  | 1.68E-06 | 4.64E-06 |
| hsa-miR-25-5p    | 1.356615128  | -0.545505392 | 1.85E-06 | 5.08E-06 |
| hsa-miR-521      | 3.888617104  | -0.369397442 | 1.89E-06 | 5.17E-06 |
| hsa-miR-6516-5p  | 1.266143182  | -0.374447342 | 2.05E-06 | 5.59E-06 |
| hsa-miR-5589-5p  | -1.322233398 | 3.653734476  | 2.18E-06 | 5.93E-06 |
| hsa-miR-493-5p   | 1.586901766  | 4.331267292  | 2.57E-06 | 6.94E-06 |
| hsa-miR-92b-3p   | 1.045801651  | 4.231047628  | 2.85E-06 | 7.67E-06 |
| hsa-miR-371a-5p  | 5.261472667  | 1.095146825  | 3.34E-06 | 8.89E-06 |
| hsa-miR-3680-3p  | 1.372709951  | -0.554920984 | 3.57E-06 | 9.47E-06 |
| hsa-miR-577      | 2.288289828  | 0.558935228  | 3.65E-06 | 9.66E-06 |
| hsa-miR-34b-5p   | 2.395859931  | -0.34748982  | 4.34E-06 | 1.15E-05 |

|                   |              |              |             |             |
|-------------------|--------------|--------------|-------------|-------------|
| hsa-miR-203b-3p   | 3.588270231  | 2.185404251  | 4.37E-06    | 1.15E-05    |
| hsa-miR-6788-3p   | 1.170450327  | -0.133574991 | 5.04E-06    | 1.32E-05    |
| hsa-miR-892a      | 3.731614244  | -0.432946958 | 5.65E-06    | 1.47E-05    |
| hsa-miR-524-3p    | 3.706514413  | -0.447634071 | 7.63E-06    | 1.97E-05    |
| hsa-miR-376b-5p   | -1.088267144 | 0.329120659  | 8.34E-06    | 2.14E-05    |
| hsa-miR-517b-3p   | 4.262345403  | 3.366161696  | 8.76E-06    | 2.23E-05    |
| hsa-miR-517a-3p   | 4.262177745  | 3.366001063  | 8.76E-06    | 2.23E-05    |
| hsa-miR-5589-3p   | -1.214075769 | 3.156151417  | 8.89E-06    | 2.26E-05    |
| hsa-miR-410-3p    | 1.443630155  | 5.056970049  | 8.92E-06    | 2.26E-05    |
| hsa-miR-520d-5p   | 3.991487261  | -0.224757416 | 8.97E-06    | 2.26E-05    |
| hsa-miR-301b-5p   | 1.575886681  | -0.278189136 | 9.98E-06    | 2.50E-05    |
| hsa-miR-412-5p    | 1.653487457  | 4.013436008  | 1.00E-05    | 2.51E-05    |
| hsa-miR-6720-3p   | 2.295344184  | -0.67619842  | 1.01E-05    | 2.53E-05    |
| hsa-miR-6516-3p   | 1.169795098  | -0.617904973 | 1.04E-05    | 2.59E-05    |
| hsa-miR-6734-5p   | 1.184235043  | -0.676628386 | 1.10E-05    | 2.72E-05    |
| hsa-miR-561-5p    | 2.49426459   | -0.307326147 | 1.12E-05    | 2.76E-05    |
| hsa-miR-432-5p    | 1.548693048  | 4.564179199  | 1.52E-05    | 3.68E-05    |
| hsa-miR-1224-5p   | 2.087227332  | 0.21975036   | 1.60E-05    | 3.86E-05    |
| hsa-miR-485-3p    | 1.55927595   | 3.715534059  | 1.79E-05    | 4.30E-05    |
| hsa-miR-371a-3p   | 4.792021802  | 1.046284259  | 1.80E-05    | 4.32E-05    |
| hsa-miR-944       | 1.426232719  | 1.434314429  | 1.93E-05    | 4.57E-05    |
| hsa-miR-3934-5p   | 1.38842242   | -0.543398658 | 2.81E-05    | 6.63E-05    |
| hsa-miR-509-3-5p  | 3.472901691  | 0.251899212  | 3.50E-05    | 8.18E-05    |
| hsa-miR-3922-3p   | 1.01419497   | -0.027703085 | 3.56E-05    | 8.27E-05    |
| hsa-miR-7-5p      | 1.020840317  | 0.241447579  | 3.81E-05    | 8.75E-05    |
| hsa-miR-496       | 1.407491235  | 1.991873999  | 4.84E-05    | 0.000110657 |
| hsa-miR-520g-5p   | 3.490877812  | -0.444260615 | 5.08E-05    | 0.000115346 |
| hsa-miR-409-5p    | 1.232431735  | 4.024125173  | 5.20E-05    | 0.000117714 |
| hsa-miR-147b-3p   | 1.493970583  | -0.326938767 | 5.36E-05    | 0.000120818 |
| hsa-miR-376c-5p   | -1.008816714 | 0.409051499  | 5.64E-05    | 0.000126681 |
| hsa-miR-382-3p    | 1.290325966  | 2.176962363  | 8.37E-05    | 0.000186056 |
| hsa-miR-539-5p    | 1.314987414  | 3.760605392  | 0.00010071  | 0.000220218 |
| hsa-miR-3131      | 1.957950666  | -0.219414732 | 0.000101521 | 0.000221403 |
| hsa-miR-31-5p     | 2.169776094  | 0.500722609  | 0.000114796 | 0.000249028 |
| hsa-miR-499a-5p   | 1.868749052  | 1.508486596  | 0.000130938 | 0.00028107  |
| hsa-miR-3660      | 2.78202356   | -0.747090699 | 0.000148572 | 0.000315619 |
| hsa-miR-141-5p    | 1.777415366  | 4.053589463  | 0.00015186  | 0.000321771 |
| hsa-miR-5683      | 1.150100325  | 1.156786861  | 0.000218148 | 0.00045867  |
| hsa-miR-129-5p    | 1.36725976   | 1.11834664   | 0.000262487 | 0.000547682 |
| hsa-miR-889-3p    | 1.185834882  | 5.705693097  | 0.000271628 | 0.000563445 |
| hsa-miR-204-5p    | 1.11346818   | 5.80935209   | 0.000272103 | 0.000563445 |
| hsa-miR-653-3p    | 1.482283693  | -0.135654614 | 0.000278415 | 0.000575064 |
| hsa-miR-766-5p    | 1.009129609  | -0.623711303 | 0.000309297 | 0.000632477 |
| hsa-miR-551b-3p   | 1.608464194  | 3.063061896  | 0.000459137 | 0.000925043 |
| hsa-miR-539-3p    | 1.385375736  | 1.465755547  | 0.000513632 | 0.001024765 |
| hsa-miR-20b-3p    | 1.271641585  | 0.165301338  | 0.000595625 | 0.001176897 |
| hsa-miR-1185-1-3p | 1.512377636  | -0.369927132 | 0.000686    | 0.001345742 |
| hsa-miR-483-3p    | 1.864910932  | 7.899011155  | 0.000736673 | 0.001438266 |
| hsa-miR-135b-5p   | 1.563895958  | 1.822679341  | 0.000760325 | 0.001480918 |
| hsa-miR-4739      | 1.194013664  | -0.135728858 | 0.000764772 | 0.00148605  |
| hsa-miR-206       | 1.530962161  | 0.160385803  | 0.000797612 | 0.001542551 |
| hsa-miR-199b-5p   | 1.213822648  | 4.654634761  | 0.000895993 | 0.001724682 |
| hsa-miR-487a-3p   | 1.415772833  | 0.843793233  | 0.001009639 | 0.001929846 |
| hsa-miR-499a-3p   | 1.792975932  | 0.722923543  | 0.001309947 | 0.002450224 |
| hsa-miR-4784      | -1.137826847 | -0.321894509 | 0.001311766 | 0.002450224 |
| hsa-miR-380-3p    | 1.468380508  | 0.218418501  | 0.001536483 | 0.002818605 |
| hsa-miR-506-3p    | 2.072993069  | -0.340691516 | 0.001577313 | 0.002887046 |
| hsa-miR-346       | 1.529266052  | -0.382230346 | 0.001711972 | 0.003126542 |

|                 |             |              |             |             |
|-----------------|-------------|--------------|-------------|-------------|
| hsa-miR-483-5p  | 1.618509959 | 6.737162071  | 0.002078502 | 0.003729479 |
| hsa-miR-668-3p  | 1.53060931  | -0.640590908 | 0.002301439 | 0.004093667 |
| hsa-miR-708-5p  | 1.021542634 | 1.785945723  | 0.002567161 | 0.004507649 |
| hsa-miR-508-5p  | 1.991729259 | 0.165699044  | 0.002775224 | 0.004862572 |
| hsa-miR-380-5p  | 1.162052018 | 1.177449148  | 0.003222386 | 0.005562855 |
| hsa-miR-3681-5p | 1.605495719 | -0.098405234 | 0.004509185 | 0.007655344 |
| hsa-miR-376a-3p | 1.116162518 | 1.687583448  | 0.007279568 | 0.011986437 |
| hsa-miR-802     | 1.696783777 | 1.529874674  | 0.01062045  | 0.017211007 |
| hsa-miR-202-5p  | 1.270697399 | -0.185620244 | 0.010740545 | 0.017324774 |
| hsa-miR-211-5p  | 1.077149665 | 0.647949346  | 0.019160867 | 0.029533668 |
| hsa-miR-1911-5p | 1.78840199  | 0.924638825  | 0.022262968 | 0.03412268  |
| hsa-miR-200c-5p | 1.499437876 | -0.033869131 | 0.023010543 | 0.035137142 |

oles.

Table S3. Survival information of differentially expressed miRNA in train group

| id           | futime      | fustat | hsa-miR-424-5p | hsa-miR-139-3p | hsa-miR-1258 |
|--------------|-------------|--------|----------------|----------------|--------------|
| TCGA-5R-AA1D | 1.230136986 | 0      | 9.508539136    | 7.691428022    | 1.415339214  |
| TCGA-2Y-A9GV | 6.936986301 | 1      | 8.948636434    | 7.181073945    | 4.125304723  |
| TCGA-G3-A25Y | 1.238356164 | 1      | 9.587966743    | 6.649037067    | 2.352950889  |
| TCGA-FV-A3I1 | 0.676712329 | 1      | 9.20413251     | 5.381603011    | 0.859446017  |
| TCGA-DD-A118 | 9.416438356 | 0      | 8.602372411    | 7.138478691    | 2.400863138  |
| TCGA-DD-AAC9 | 0.950684932 | 0      | 8.894850601    | 7.05123077     | 0.03341657   |
| TCGA-DD-AADU | 1.517808219 | 0      | 8.166806818    | 7.023583071    | 0.228151848  |
| TCGA-CC-A3MA | 0.830136986 | 1      | 8.968961828    | 5.773376668    | 1.38891995   |
| TCGA-DD-AACS | 4.942465753 | 0      | 7.177416999    | 6.252679901    | 0.763420189  |
| TCGA-G3-AAV6 | 0.178082192 | 1      | 7.838759653    | 4.997962159    | 1.2504032    |
| TCGA-K7-A5RF | 1.728767123 | 0      | 10.12410334    | 7.365444788    | 5.207347631  |
| TCGA-ED-A4XI | 2.243835616 | 0      | 10.50153444    | 6.290208082    | 3.473497586  |
| TCGA-DD-AAW3 | 4.473972603 | 0      | 8.271199157    | 8.016325627    | 0            |
| TCGA-CC-5264 | 0.279452055 | 1      | 8.30166083     | 6.192271607    | 3.340915642  |
| TCGA-MI-A75C | 0.797260274 | 0      | 7.702619771    | 2.952676258    | 0            |
| TCGA-DD-AACA | 6.304109589 | 0      | 8.616831185    | 7.405402585    | 1.286373915  |
| TCGA-UB-A7MD | 0.142465753 | 1      | 9.174536663    | 7.392628645    | 0            |
| TCGA-CC-A5UE | 0.745205479 | 1      | 6.731474886    | 3.365865599    | 0            |
| TCGA-RC-A7S9 | 1.753424658 | 0      | 7.382774975    | 5.267713046    | 3.78357539   |
| TCGA-5R-AAAM | 0.126027397 | 1      | 10.52049921    | 8.535728773    | 4.114772483  |
| TCGA-3K-AAZ8 | 1.084931507 | 0      | 8.17955773     | 7.181457393    | 0.400060789  |
| TCGA-DD-A4NA | 2.761643836 | 0      | 8.049464052    | 5.701362172    | 0.11763996   |
| TCGA-DD-AAE6 | 0.38630137  | 0      | 7.583465637    | 5.538852282    | 0            |
| TCGA-ZP-A9D0 | 2.989041096 | 0      | 9.191930856    | 7.311744055    | 0.202332748  |
| TCGA-DD-AAVS | 4.994520548 | 0      | 8.085436396    | 6.550756892    | 2.130210393  |
| TCGA-2Y-A9H5 | 1.520547945 | 1      | 10.11356802    | 6.504818162    | 1.905830411  |
| TCGA-ED-A8O6 | 0.153424658 | 1      | 7.608457885    | 4.058963497    | 0.010292929  |
| TCGA-G3-AAV1 | 0.983561644 | 1      | 8.877430391    | 7.371616148    | 0.187538477  |
| TCGA-DD-AAED | 2.090410959 | 0      | 7.504399734    | 4.533656582    | 2.239227407  |
| TCGA-G3-A3CG | 1.843835616 | 0      | 9.04201839     | 6.806774336    | 2.492691355  |
| TCGA-EP-A3RK | 0.994520548 | 0      | 9.036467192    | 5.99723472     | 1.429216227  |
| TCGA-DD-AADJ | 2.920547945 | 0      | 6.757944234    | 6.679573321    | 4.077368488  |
| TCGA-ED-A8O5 | 1.112328767 | 0      | 8.618167411    | 7.433768456    | 0.059867061  |
| TCGA-2Y-A9H6 | 0.978082192 | 0      | 9.100944447    | 6.815138716    | 0.673044292  |
| TCGA-DD-A3A0 | 2.150684932 | 1      | 7.821608015    | 6.075238807    | 3.306653267  |
| TCGA-DD-A1EJ | 2.753424658 | 1      | 9.023538812    | 2.898599437    | 3.281459003  |
| TCGA-G3-A6UC | 1.838356164 | 0      | 6.488726365    | 7.489993248    | 0.09977175   |
| TCGA-PD-A5DF | 1.750684932 | 1      | 9.124581418    | 4.095088834    | 1.06182241   |
| TCGA-2Y-A9H3 | 4.153424658 | 0      | 8.632352501    | 7.527245859    | 1.166072485  |
| TCGA-UB-A7MA | 2.323287671 | 0      | 10.37442157    | 5.000170644    | 0.024737137  |
| TCGA-MI-A75G | 1.912328767 | 0      | 8.092014056    | 5.727731552    | 2.946932943  |
| TCGA-BD-A2L6 | 3.734246575 | 0      | 8.096878199    | 7.354317725    | 1.02569718   |
| TCGA-DD-AADL | 1.742465753 | 0      | 8.313642825    | 7.050773466    | 1.43965192   |
| TCGA-G3-A7M8 | 1.178082192 | 0      | 8.698674309    | 8.471275682    | 0.178849905  |
| TCGA-DD-A1EL | 1.136986301 | 1      | 8.940671902    | 6.517901813    | 1.516234097  |
| TCGA-G3-A25Z | 1.794520548 | 0      | 9.269339834    | 7.551951891    | 3.6789035    |
| TCGA-DD-A73E | 0.120547945 | 0      | 7.618218108    | 6.901613935    | 0.256072613  |
| TCGA-DD-AACO | 5.139726027 | 0      | 8.639934088    | 6.375551939    | 2.468168     |
| TCGA-2Y-A9HA | 0.098630137 | 1      | 8.931219718    | 5.477829915    | 0            |
| TCGA-WX-AA46 | 2.071232877 | 0      | 11.00895772    | 8.953269809    | 4.792773972  |
| TCGA-G3-A7M7 | 0.989041096 | 0      | 9.230892212    | 6.641415283    | 3.027668812  |
| TCGA-BC-A10X | 2.109589041 | 1      | 12.34809414    | 8.983690375    | 5.203719224  |
| TCGA-DD-AAD1 | 1.545205479 | 0      | 9.018601367    | 7.033092808    | 1.362889313  |
| TCGA-DD-A4NB | 2.709589041 | 0      | 10.41083481    | 4.460288783    | 2.200029638  |
| TCGA-G3-A3CK | 1.602739726 | 0      | 8.013557037    | 6.665134825    | 0.029873328  |
| TCGA-G3-A3CI | 0.493150685 | 0      | 9.225979345    | 8.274650891    | 0            |

|              |             |   |             |             |             |
|--------------|-------------|---|-------------|-------------|-------------|
| TCGA-DD-AAEE | 2.219178082 | 0 | 8.594427843 | 7.602640591 | 0.104421376 |
| TCGA-CC-5261 | 0.265753425 | 1 | 10.22184376 | 6.449995904 | 0           |
| TCGA-CC-A3MB | 0.863013699 | 1 | 9.289510186 | 7.137019973 | 1.614091245 |
| TCGA-RC-A7SB | 1.610958904 | 0 | 7.600552896 | 6.67005441  | 4.261422648 |
| TCGA-ZP-A9D2 | 2.095890411 | 1 | 10.18441774 | 6.733846218 | 0.529118532 |
| TCGA-DD-AADD | 3.37260274  | 0 | 7.116887508 | 5.540142608 | 0.08389656  |
| TCGA-2Y-A9GY | 2.073972603 | 1 | 8.53889729  | 4.285543879 | 0.006484722 |
| TCGA-DD-AACL | 0.293150685 | 1 | 10.0812811  | 4.211382199 | 1.119433037 |
| TCGA-K7-A5RG | 1.421917808 | 0 | 8.80296616  | 5.654701918 | 1.963492855 |
| TCGA-HP-A5N0 | 2.060273973 | 1 | 9.8477064   | 7.368526718 | 4.249941624 |
| TCGA-ES-A2HS | 1.884931507 | 1 | 8.137924729 | 6.819181604 | 6.157599274 |
| TCGA-DD-A4NE | 1.808219178 | 1 | 8.865670125 | 5.128900839 | 2.449427953 |
| TCGA-DD-A4NL | 4.687671233 | 0 | 8.550911247 | 7.475438998 | 5.110557055 |
| TCGA-O8-A75V | 1.473972603 | 0 | 8.806196542 | 6.958345684 | 0           |
| TCGA-XR-A8TD | 2.821917808 | 0 | 9.627686943 | 6.631862616 | 1.912256073 |
| TCGA-DD-AADO | 1.24109589  | 0 | 7.422969357 | 3.008699957 | 0.03873945  |
| TCGA-2Y-A9HB | 0.712328767 | 0 | 8.484646297 | 6.839853418 | 0.041961577 |
| TCGA-CC-A8HU | 0.942465753 | 1 | 8.122613099 | 5.702825935 | 2.88690369  |
| TCGA-G3-A5SJ | 1.912328767 | 0 | 8.369862026 | 4.224499871 | 0.818000341 |
| TCGA-2Y-A9GZ | 2.323287671 | 1 | 8.648296309 | 7.987302305 | 3.413954955 |
| TCGA-CC-5263 | 0.353424658 | 1 | 9.296191236 | 5.143027359 | 1.121333481 |
| TCGA-UB-A7MB | 1.646575342 | 0 | 9.00138845  | 6.515188024 | 0.16806202  |
| TCGA-DD-AACN | 3.567123288 | 0 | 9.464080884 | 6.902349849 | 2.293053469 |
| TCGA-DD-A3A7 | 1.147945205 | 1 | 8.134972557 | 4.73473993  | 0.049701325 |
| TCGA-DD-AAVX | 4.706849315 | 0 | 8.172389343 | 8.135032808 | 0.150070129 |
| TCGA-DD-AAVU | 6.032876712 | 0 | 8.296245481 | 5.099679154 | 0           |
| TCGA-UB-A7ME | 1.331506849 | 0 | 8.72160614  | 6.405178446 | 1.277305601 |
| TCGA-DD-AACG | 1.284931507 | 1 | 7.895878846 | 4.197487134 | 2.682940226 |
| TCGA-G3-A25X | 4.873972603 | 0 | 10.22246786 | 5.589241655 | 0.918532366 |
| TCGA-DD-AACW | 3.901369863 | 0 | 6.203256804 | 6.558626997 | 3.599777315 |
| TCGA-KR-A7K2 | 2.271232877 | 0 | 9.648202789 | 6.306157379 | 0.109276395 |
| TCGA-ED-A5KG | 2.339726027 | 0 | 7.208715611 | 3.988665119 | 0.653131307 |
| TCGA-UB-A7MC | 1.369863014 | 0 | 7.431744584 | 7.42707498  | 0.286311156 |
| TCGA-EP-A2KA | 1.717808219 | 1 | 8.333325637 | 4.956552774 | 2.587017905 |
| TCGA-DD-A4NG | 2.197260274 | 1 | 8.884745739 | 5.323279689 | 2.448683644 |
| TCGA-GJ-A6C0 | 0.084931507 | 1 | 7.833940535 | 3.820006704 | 5.369346008 |
| TCGA-DD-A3A1 | 0.638356164 | 1 | 8.292648067 | 2.810166235 | 3.715333789 |
| TCGA-DD-A1EK | 1.528767123 | 1 | 8.517914352 | 4.163358672 | 1.049090458 |
| TCGA-KR-A7K7 | 2.605479452 | 0 | 8.165071403 | 4.446675729 | 0.7032128   |
| TCGA-DD-A1EH | 4.095890411 | 0 | 9.09056181  | 6.378096725 | 0           |
| TCGA-DD-AAW0 | 5.520547945 | 0 | 10.57869261 | 7.070412276 | 0.855421309 |
| TCGA-GJ-A9DB | 0.183561644 | 1 | 8.279911151 | 6.056760398 | 0.081263733 |
| TCGA-5R-AA1C | 1.424657534 | 0 | 8.198926842 | 6.951243006 | 0.970099065 |
| TCGA-FV-A23B | 5.073972603 | 1 | 8.921847586 | 6.283368667 | 3.271095607 |
| TCGA-CC-5259 | 0.684931507 | 0 | 7.003250927 | 3.615436127 | 2.307247184 |
| TCGA-DD-AA3A | 1.123287671 | 1 | 8.160103995 | 5.537286182 | 0           |
| TCGA-RG-A7D4 | 3.008219178 | 0 | 7.544135016 | 5.230110129 | 0           |
| TCGA-DD-A3A5 | 8.561643836 | 1 | 8.306763576 | 6.760276561 | 4.939473317 |
| TCGA-BC-A3KG | 1.863013699 | 0 | 8.305318671 | 5.795677902 | 1.293132065 |
| TCGA-DD-AACM | 4.846575342 | 0 | 9.49439626  | 5.594951643 | 0.392699912 |
| TCGA-BC-A10W | 0.249315068 | 1 | 9.830807215 | 5.994280022 | 0.010724722 |
| TCGA-DD-A3A6 | 8.926027397 | 1 | 10.58411021 | 8.507307535 | 0           |
| TCGA-DD-AACC | 4.616438356 | 1 | 9.474674045 | 7.567800802 | 3.817250847 |
| TCGA-CC-A7II | 1.093150685 | 0 | 8.32419721  | 5.101268496 | 2.166717976 |
| TCGA-CC-5262 | 0.282191781 | 1 | 10.0633645  | 7.182828445 | 0.649237    |
| TCGA-DD-A3A9 | 2.550684932 | 1 | 8.764164845 | 5.752555857 | 0.013604435 |
| TCGA-BC-4072 | 4.082191781 | 1 | 10.38189929 | 5.555779233 | 0.022288377 |
| TCGA-ZS-A9CD | 3.797260274 | 1 | 8.678592968 | 6.402554062 | 0.792894723 |

|              |             |   |             |             |             |
|--------------|-------------|---|-------------|-------------|-------------|
| TCGA-BC-A69I | 1.060273973 | 0 | 7.825656012 | 7.51968935  | 0.245242734 |
| TCGA-DD-A114 | 3.147945205 | 1 | 9.864814866 | 7.77784427  | 3.286370551 |
| TCGA-DD-AAD8 | 3.339726027 | 0 | 8.5660618   | 5.433674183 | 0           |
| TCGA-GJ-A3OU | 2.408219178 | 0 | 9.170060981 | 6.187876747 | 2.589860736 |
| TCGA-ED-A7XP | 1.095890411 | 0 | 8.833967251 | 7.293240495 | 0.02632058  |
| TCGA-CC-A9FW | 0.679452055 | 0 | 8.104321693 | 3.272977059 | 2.417331298 |
| TCGA-2Y-A9GS | 1.983561644 | 1 | 8.945588879 | 6.247287187 | 0.624711849 |
| TCGA-DD-A39W | 2.265753425 | 1 | 7.592582215 | 6.134860755 | 0           |
| TCGA-G3-A5SM | 1.424657534 | 0 | 9.750310871 | 5.676035598 | 4.02952993  |
| TCGA-ED-A66Y | 0.810958904 | 1 | 6.852468265 | 3.049535714 | 1.170739941 |
| TCGA-BC-A69H | 1.216438356 | 0 | 6.65429093  | 4.143918236 | 0.062775982 |
| TCGA-DD-A73F | 2.97260274  | 0 | 8.308352054 | 4.854017631 | 3.360493391 |
| TCGA-CC-A8HV | 0.764383562 | 1 | 8.236393179 | 4.967198706 | 1.932493027 |
| TCGA-4R-AA8I | 0.717808219 | 1 | 9.233702797 | 6.116872507 | 0.008538305 |
| TCGA-ZS-A9CE | 3.4         | 0 | 8.372852294 | 7.318098798 | 0.025342748 |
| TCGA-G3-A5SK | 2.038356164 | 0 | 8.929990698 | 6.859059184 | 3.35264955  |
| TCGA-DD-AADC | 1.164383562 | 1 | 9.60271045  | 6.382118912 | 2.130837254 |
| TCGA-BC-A10Y | 1.947945205 | 1 | 10.01368696 | 7.430634341 | 0.042043701 |
| TCGA-BC-A10Q | 3.109589041 | 1 | 9.518931924 | 5.775789702 | 0           |
| TCGA-RC-A7SF | 1.58630137  | 0 | 7.710616991 | 6.498715524 | 1.558467839 |
| TCGA-G3-AAV2 | 1.019178082 | 0 | 7.771691206 | 7.002039498 | 0.061500863 |
| TCGA-CC-A1HT | 0.276712329 | 1 | 9.728560352 | 6.129440128 | 0.608794222 |
| TCGA-DD-AAE7 | 1.764383562 | 0 | 8.8858183   | 7.362039563 | 5.403723094 |
| TCGA-G3-A5SI | 2.104109589 | 1 | 7.923258612 | 5.975425142 | 1.752891905 |
| TCGA-XR-A8TC | 3.668493151 | 0 | 6.891194268 | 6.621487514 | 1.498371425 |
| TCGA-ED-A627 | 1.15890411  | 0 | 10.5267487  | 7.466896264 | 2.678818828 |
| TCGA-DD-A1EC | 1.649315068 | 0 | 9.26569462  | 6.443673803 | 2.724060909 |
| TCGA-YA-A8S7 | 1.128767123 | 1 | 8.568636297 | 5.325455191 | 1.396488832 |
| TCGA-DD-AADV | 1.57260274  | 0 | 8.817078812 | 7.104504304 | 2.327344544 |
| TCGA-DD-A3A4 | 1.676712329 | 1 | 7.919908105 | 7.334921173 | 0.273201808 |
| TCGA-G3-A7M5 | 1.224657534 | 0 | 7.951732801 | 7.747568865 | 3.372142965 |
| TCGA-DD-A39Y | 0.468493151 | 1 | 9.00859779  | 5.189517544 | 0.750710889 |
| TCGA-DD-AACF | 1           | 1 | 8.670388701 | 6.627715382 | 1.6514909   |
| TCGA-EP-A2KB | 1.632876712 | 1 | 7.25319814  | 6.435229915 | 3.509950788 |
| TCGA-DD-AAE2 | 1.747945205 | 0 | 8.755587654 | 8.338375369 | 0           |
| TCGA-DD-AACZ | 0.468493151 | 1 | 9.491054839 | 4.49404607  | 1.065430403 |
| TCGA-DD-A116 | 4.443835616 | 1 | 10.24952147 | 7.65101385  | 0.055158321 |
| TCGA-DD-AACQ | 1.183561644 | 1 | 8.531800919 | 5.016590351 | 1.138366509 |
| TCGA-2Y-A9H2 | 4.742465753 | 0 | 8.874889956 | 5.548734347 | 2.105763361 |
| TCGA-DD-AADW | 1.608219178 | 0 | 8.721640938 | 5.816245217 | 1.1529411   |
| TCGA-DD-A11D | 4.273972603 | 1 | 10.33220312 | 7.487736044 | 2.570026957 |
| TCGA-MR-A520 | 0.62739726  | 0 | 8.833473822 | 7.366850104 | 2.001385845 |
| TCGA-DD-A115 | 6.964383562 | 1 | 10.91416929 | 6.889716863 | 0.900111308 |
| TCGA-DD-AACY | 3.97260274  | 0 | 7.752379935 | 7.332440243 | 3.417870926 |
| TCGA-DD-A73G | 9.528767123 | 0 | 9.09661398  | 5.925022792 | 0.953951421 |
| TCGA-CC-5260 | 0.238356164 | 1 | 9.855666288 | 6.161926013 | 0.600415654 |
| TCGA-DD-AACI | 4.432876712 | 0 | 8.803854714 | 5.661592386 | 1.271553605 |
| TCGA-DD-A4NQ | 1.021917808 | 1 | 8.678879189 | 3.931336512 | 2.898550432 |
| TCGA-FV-A2QQ | 1.997260274 | 0 | 8.989225893 | 6.843305772 | 1.642516108 |
| TCGA-CC-A5UC | 0.950684932 | 1 | 10.2287993  | 5.609950759 | 1.992060772 |
| TCGA-DD-A4NH | 2.512328767 | 0 | 9.232920722 | 3.784911484 | 0.813537342 |
| TCGA-DD-AAVQ | 7.473972603 | 0 | 9.593543456 | 6.61644334  | 0           |
| TCGA-DD-AAVY | 5.397260274 | 0 | 6.540502078 | 7.446948277 | 0.105732819 |
| TCGA-UB-A7MF | 0.58630137  | 1 | 8.150000768 | 3.721523513 | 5.04710645  |
| TCGA-ED-A459 | 2.493150685 | 0 | 9.092519211 | 3.974687118 | 3.280724243 |
| TCGA-2Y-A9GT | 4.449315068 | 1 | 8.473604213 | 7.692797985 | 5.33156815  |
| TCGA-2Y-A9H8 | 1.734246575 | 1 | 7.93725652  | 4.722280652 | 2.692407282 |
| TCGA-DD-AAEI | 4.194520548 | 0 | 7.779865419 | 6.448013139 | 0.11704542  |

| hsa-miR-21-5p | hsa-miR-93-5p | hsa-miR-589-5p | hsa-miR-10b-5p | hsa-miR-4746-5p |
|---------------|---------------|----------------|----------------|-----------------|
| 20.60763773   | 13.13187235   | 7.459599462    | 15.50362823    | 1.418334712     |
| 19.52518808   | 13.82307799   | 8.484667452    | 16.5513193     | 3.208155592     |
| 18.8895184    | 14.43529359   | 8.299701676    | 17.44978644    | 5.203528313     |
| 20.48230647   | 14.8777952    | 8.222927972    | 13.61545008    | 3.364842724     |
| 20.02350107   | 14.22575759   | 8.723942952    | 18.70082134    | 3.409364729     |
| 21.1791041    | 14.20032767   | 8.3890444      | 12.81247468    | 2.159913107     |
| 20.62376238   | 14.70536572   | 8.671609147    | 14.84100061    | 3.580906405     |
| 20.33292671   | 15.74202526   | 7.826169791    | 11.19068521    | 4.863061763     |
| 19.72490597   | 15.47245054   | 10.25816653    | 11.93358984    | 5.384351718     |
| 18.67210264   | 15.88462163   | 8.854035345    | 18.99885368    | 6.170974332     |
| 18.26534165   | 13.82807074   | 7.240004567    | 15.82802532    | 0.132488497     |
| 19.67605847   | 14.58416988   | 7.616538266    | 15.80094445    | 1.356170411     |
| 19.33595789   | 15.490015     | 9.903795032    | 15.22059337    | 3.383388421     |
| 20.26495001   | 15.68157307   | 8.724373418    | 14.58134018    | 6.076429523     |
| 21.03406057   | 15.02469495   | 9.262778035    | 15.98920375    | 1.957621556     |
| 20.55607648   | 15.59766283   | 9.346072135    | 14.51202866    | 4.507706739     |
| 20.02863351   | 14.23487951   | 8.491887417    | 16.83416978    | 3.752349788     |
| 20.20030181   | 15.51472881   | 9.053858493    | 16.61613211    | 3.74916121      |
| 19.09299759   | 14.52007648   | 7.437871849    | 8.848502359    | 5.625078089     |
| 20.0538381    | 14.20096171   | 7.994696904    | 17.42118108    | 3.403162346     |
| 20.18516164   | 14.51762755   | 8.093581958    | 16.20729013    | 3.04036133      |
| 21.1735756    | 15.69031389   | 8.945971322    | 16.13675424    | 3.373880469     |
| 17.87476801   | 14.11887358   | 8.596267657    | 17.49802934    | 4.065517639     |
| 19.39572768   | 13.57450641   | 7.925653633    | 12.84173051    | 2.389001376     |
| 19.7400463    | 14.80298336   | 9.312714622    | 13.49171892    | 4.584045257     |
| 19.8239165    | 13.92163084   | 8.910772962    | 12.01752742    | 2.364848203     |
| 18.81527996   | 14.25448413   | 7.82314444     | 18.17864971    | 3.758334        |
| 21.20054315   | 14.53178986   | 9.369943467    | 18.00605094    | 3.14734339      |
| 20.32360851   | 15.60716642   | 9.208651361    | 13.52405818    | 2.576989557     |
| 19.92072929   | 14.69868794   | 8.556754827    | 13.37967418    | 2.987829153     |
| 20.52821464   | 14.6176226    | 9.045020734    | 16.88342232    | 4.787211207     |
| 18.6842149    | 15.73217947   | 8.910199666    | 18.68384693    | 3.985669337     |
| 18.49638174   | 15.11771533   | 8.466596672    | 17.6478099     | 4.1259341       |
| 20.19387566   | 14.05332922   | 7.487002548    | 13.8419018     | 3.16161143      |
| 19.43663374   | 15.15368492   | 9.7371481      | 19.4414285     | 3.675065041     |
| 19.19615374   | 14.74967321   | 7.305075925    | 14.56809072    | 4.3611259       |
| 18.82723059   | 14.92500856   | 9.765474837    | 16.14104145    | 2.451921983     |
| 20.32682696   | 15.23960358   | 8.607183948    | 14.23227175    | 4.264515331     |
| 20.80614753   | 14.54426786   | 8.490425079    | 18.54149469    | 3.410732239     |
| 20.9393176    | 14.66553418   | 7.873193239    | 13.07410006    | 4.894709447     |
| 19.87229495   | 14.62602048   | 9.098396904    | 17.07321948    | 3.090264906     |
| 17.53141585   | 14.45930424   | 8.865002254    | 16.17804682    | 3.846563561     |
| 19.49278241   | 15.21201501   | 9.411602062    | 14.12654909    | 4.080121671     |
| 18.95879831   | 14.23330081   | 8.577038356    | 17.49262594    | 4.00321196      |
| 19.83180963   | 14.12281405   | 9.568765291    | 18.16167355    | 5.322365071     |
| 20.80938105   | 13.41257183   | 8.561821637    | 12.18546973    | 4.387481996     |
| 19.29223389   | 15.48759412   | 9.618546952    | 16.85329574    | 2.575238662     |
| 20.40750423   | 15.35262816   | 9.927542064    | 16.58338931    | 3.097461271     |
| 19.77244215   | 14.92240898   | 8.948475644    | 17.5411213     | 2.583033941     |
| 18.61423929   | 14.42934389   | 8.068093803    | 11.63710304    | 1.69718392      |
| 20.23994719   | 14.07268835   | 8.49920029     | 13.83135009    | 1.338950405     |
| 19.39320831   | 12.74816858   | 7.271633053    | 13.75268672    | 1.268113937     |
| 19.89357139   | 15.0056786    | 8.111059449    | 18.33409461    | 3.026968069     |
| 20.11789648   | 14.46180015   | 7.734197003    | 12.97500257    | 1.538519706     |
| 20.03896607   | 14.08835504   | 9.001122584    | 15.57331984    | 3.864463054     |
| 18.58274649   | 14.12030652   | 8.353968496    | 16.97468138    | 2.976641112     |



|             |             |             |             |             |
|-------------|-------------|-------------|-------------|-------------|
| 20.45587643 | 14.87031395 | 8.83726962  | 8.561025887 | 3.688773744 |
| 19.43010702 | 13.5590293  | 8.099366177 | 17.97299617 | 4.448065461 |
| 19.0400391  | 15.32986825 | 8.990486169 | 10.95886681 | 4.79256393  |
| 19.19276543 | 14.72356465 | 9.56652752  | 16.06095805 | 3.09160916  |
| 20.49161498 | 14.23190679 | 9.608701517 | 13.53351802 | 4.76259373  |
| 19.2748265  | 14.94199875 | 9.662947139 | 14.47263803 | 4.900067004 |
| 20.74067562 | 15.31972842 | 9.578240305 | 14.61414606 | 5.73828879  |
| 18.91110428 | 14.95217166 | 8.748428547 | 16.43393225 | 4.602615758 |
| 20.85536687 | 15.21762112 | 8.209922291 | 14.72878776 | 2.774103909 |
| 17.56448402 | 14.41399494 | 7.847701832 | 18.26107046 | 2.323812103 |
| 18.98673395 | 14.15718438 | 8.568856967 | 12.91374533 | 3.718784576 |
| 19.77764439 | 16.04798658 | 8.571901119 | 11.47826944 | 4.800514018 |
| 19.07010744 | 14.45882474 | 7.804652167 | 17.32473809 | 2.833533191 |
| 21.22316198 | 14.40332157 | 9.44842754  | 18.00728791 | 4.236964247 |
| 19.81327157 | 14.43181732 | 8.064686066 | 16.24663871 | 5.478026699 |
| 20.67655596 | 15.38170197 | 8.550242973 | 15.34568782 | 5.169802934 |
| 20.24649382 | 14.11233386 | 8.421350282 | 12.0023316  | 3.811208326 |
| 19.76647817 | 15.15560425 | 8.409765436 | 16.51127014 | 5.196048312 |
| 21.07893124 | 15.41387325 | 8.182321584 | 17.13083773 | 5.284550721 |
| 19.61634049 | 14.55584556 | 8.844860139 | 17.27427492 | 2.715344839 |
| 19.70048016 | 14.7602264  | 8.937674018 | 12.97702493 | 5.355991154 |
| 19.61005424 | 15.23535491 | 9.011466793 | 17.86508045 | 6.491359694 |
| 19.44543432 | 14.83315935 | 8.714785622 | 17.80434812 | 2.630035239 |
| 20.85241843 | 14.34174333 | 10.43727503 | 15.8290626  | 4.915867346 |
| 21.56988587 | 15.11406639 | 8.084211226 | 16.03925749 | 3.000458842 |
| 21.68297344 | 15.5919924  | 9.280401231 | 15.47319324 | 4.293112679 |
| 19.3624857  | 14.72386934 | 10.22545679 | 13.3641236  | 3.981723637 |
| 19.79878481 | 14.92953515 | 8.71828438  | 15.65669676 | 4.015280888 |
| 20.66622791 | 14.26734332 | 7.811268875 | 16.61277967 | 4.791942721 |
| 18.29060493 | 15.46769923 | 7.886010169 | 10.56956686 | 4.628088927 |
| 19.76094703 | 15.09550052 | 8.644949958 | 17.42216114 | 4.006151458 |
| 20.47240676 | 15.46650807 | 8.925528171 | 18.66641063 | 3.93212337  |
| 19.98605271 | 15.64074787 | 9.422111493 | 12.70644572 | 5.583957731 |
| 21.5824037  | 14.21080148 | 8.355555572 | 12.48345704 | 4.702754593 |
| 21.10618983 | 16.10073087 | 9.180501408 | 18.88035789 | 3.300492585 |
| 20.29220514 | 14.97383494 | 8.3726748   | 16.91195296 | 4.413949637 |
| 20.20076415 | 14.23508777 | 8.677479287 | 15.15618168 | 4.046878021 |
| 19.18769798 | 14.0261174  | 9.093183834 | 15.71734505 | 3.881918636 |
| 19.75439105 | 14.82042501 | 9.092843583 | 15.83777168 | 4.743306991 |
| 19.16187648 | 14.01039166 | 8.576742073 | 19.03488977 | 3.843380903 |
| 20.23572204 | 14.29364415 | 8.999454416 | 13.03941335 | 2.591739185 |
| 20.81985881 | 14.23502971 | 8.311212685 | 14.79334933 | 2.373463195 |
| 20.98129914 | 14.84753408 | 9.772710205 | 17.60510681 | 5.378805677 |
| 19.90756784 | 13.90759839 | 8.357588189 | 17.82426682 | 4.357043244 |
| 19.30620135 | 14.18084701 | 7.665226565 | 15.83491189 | 4.194765554 |
| 20.39242383 | 14.03302304 | 8.088730332 | 12.70960944 | 4.106492452 |
| 19.91207168 | 14.88367679 | 8.53644934  | 15.8716088  | 4.936710906 |
| 19.74065551 | 14.53638752 | 9.667053352 | 12.11890205 | 4.091730217 |
| 18.5379853  | 15.36602901 | 10.11621139 | 15.71862923 | 6.513845966 |
| 20.32563525 | 14.95210969 | 8.724120477 | 17.98720826 | 3.446737608 |
| 20.47467507 | 14.0287023  | 8.494664245 | 15.8134998  | 4.309142457 |
| 17.96033011 | 13.54367528 | 7.875489965 | 16.28867547 | 2.766615156 |
| 20.14925727 | 13.92741135 | 8.032626243 | 14.35519315 | 4.45083883  |
| 18.76348355 | 15.72388963 | 7.492224004 | 15.22969337 | 3.73003829  |
| 19.90428038 | 13.70993422 | 8.510029864 | 17.52726979 | 3.79551868  |
| 21.34933292 | 15.78888247 | 8.30994054  | 17.70844227 | 3.073652386 |
| 20.67925623 | 13.77741102 | 7.803709201 | 15.67460862 | 4.447450281 |
| 20.17440668 | 13.68645064 | 7.743678346 | 17.16276475 | 1.71909381  |

|             |             |             |             |             |
|-------------|-------------|-------------|-------------|-------------|
| 19.57455235 | 15.1768513  | 8.1108795   | 16.43508398 | 3.643550425 |
| 20.05355079 | 13.81938296 | 8.34388342  | 15.4970023  | 5.151772436 |
| 19.74357885 | 15.63726128 | 8.973382992 | 16.47551127 | 5.042154146 |
| 20.78084129 | 13.90927879 | 8.733191064 | 15.04057363 | 3.271191881 |
| 20.6707652  | 14.59241718 | 10.03723107 | 15.50259248 | 4.146427426 |
| 20.58769458 | 14.72282742 | 9.437484996 | 15.02375485 | 2.767962883 |
| 20.25048367 | 14.64407578 | 8.831410331 | 15.2832657  | 3.450266952 |
| 17.7566255  | 14.50497115 | 7.445455027 | 16.86671882 | 2.766207524 |
| 20.20089668 | 14.9303342  | 8.285258266 | 16.38406632 | 2.026551953 |
| 19.51135885 | 16.8498476  | 8.502352556 | 15.2165923  | 4.161266536 |
| 20.5134247  | 16.51872985 | 8.65640159  | 15.68955939 | 4.140340671 |
| 19.75792269 | 14.96111739 | 9.187335066 | 16.65823578 | 3.521746479 |
| 19.77752279 | 14.93646639 | 8.294264797 | 11.59202276 | 4.237544753 |
| 20.25503805 | 13.58094187 | 9.277719408 | 17.26144516 | 4.508509491 |
| 18.50889366 | 14.145701   | 9.303798581 | 15.61540411 | 2.449535615 |
| 18.82256962 | 14.87775613 | 8.053037196 | 13.43383028 | 2.335155901 |
| 19.81023018 | 15.39221062 | 10.76755494 | 15.61294466 | 5.777188325 |
| 19.14969626 | 13.78759788 | 9.53215171  | 19.13513971 | 6.384234395 |
| 21.55198854 | 14.68682874 | 9.423630929 | 13.40424669 | 5.168639716 |
| 20.53672832 | 15.11753878 | 8.871983516 | 16.34644907 | 4.357377655 |
| 19.29714197 | 14.15765286 | 8.896795899 | 16.21855381 | 3.315960886 |
| 20.3357478  | 14.3158621  | 9.182783795 | 16.58819048 | 2.932487118 |
| 19.76301491 | 14.46063078 | 8.84636965  | 13.26058978 | 3.51955717  |
| 19.68548713 | 16.33822056 | 8.881334961 | 15.86580602 | 5.424782045 |
| 19.15628413 | 13.76504496 | 8.057578738 | 13.3090486  | 4.157815811 |
| 20.2393014  | 14.66370554 | 7.837613787 | 14.94425212 | 2.41588018  |
| 20.805844   | 13.48009335 | 9.012296483 | 17.60436146 | 4.230157736 |
| 20.08042544 | 14.66429042 | 8.539892664 | 15.12145294 | 4.279704397 |
| 19.81837269 | 14.65487719 | 9.370644174 | 14.50580495 | 4.529794734 |
| 20.80442815 | 13.40951291 | 7.522049926 | 15.797438   | 0.316533539 |
| 18.06980284 | 14.49617945 | 8.986064102 | 13.02551301 | 1.633291152 |
| 19.91300581 | 15.23346682 | 9.436465661 | 13.54740808 | 3.760365014 |
| 19.83958977 | 15.40813243 | 9.215930582 | 16.47217207 | 5.256037339 |
| 19.79968273 | 14.98055602 | 7.603856593 | 15.41574984 | 5.016935387 |
| 20.123208   | 14.24021957 | 8.737554408 | 11.51686839 | 3.704447852 |
| 20.15648771 | 14.46434234 | 8.860027259 | 15.57371963 | 3.095457137 |
| 19.13861029 | 13.32554754 | 7.62482954  | 15.52651031 | 2.259002292 |
| 19.09952813 | 14.81744292 | 9.467415883 | 18.0661085  | 3.108400043 |
| 21.39995367 | 14.60550603 | 8.611416121 | 13.90212985 | 3.341315069 |
| 20.26669608 | 15.59691352 | 8.588682474 | 14.94626794 | 4.926087135 |
| 18.68830967 | 12.83883646 | 8.583117986 | 17.43921016 | 2.753180119 |
| 18.04861829 | 14.55554208 | 7.880172496 | 17.91102033 | 2.031375439 |
| 19.50722514 | 12.99259554 | 8.787695315 | 16.41404645 | 3.429901802 |
| 20.78726542 | 14.42733804 | 8.419407101 | 16.43342987 | 2.398992489 |
| 20.06859558 | 14.62092194 | 8.884204464 | 17.33858937 | 3.928279225 |
| 21.29026035 | 14.85899316 | 8.403456808 | 16.05881479 | 4.68904687  |
| 21.85697669 | 14.54601427 | 9.592814007 | 16.30225927 | 2.686299748 |
| 19.76442765 | 15.19894967 | 9.114328677 | 15.82365985 | 3.801152985 |
| 19.92775239 | 14.61827315 | 8.247449177 | 17.67328369 | 3.436090094 |
| 18.85260396 | 14.36960906 | 7.739738047 | 16.25545161 | 1.349391392 |
| 20.95008527 | 16.34856822 | 9.764261601 | 16.86068311 | 3.786749738 |
| 19.72472364 | 15.331274   | 9.21044938  | 18.39610764 | 4.433373951 |
| 19.28602838 | 15.16515689 | 9.23299082  | 15.85964876 | 2.029584722 |
| 21.46954019 | 13.37850785 | 8.583381319 | 16.56835024 | 3.479002983 |
| 20.16578662 | 16.17313817 | 8.306602102 | 16.17451255 | 5.569163659 |
| 19.9346938  | 13.51001317 | 8.744571297 | 16.04657886 | 3.283407441 |
| 19.15887763 | 14.61023435 | 8.595337619 | 16.21407981 | 3.379407614 |
| 20.22942272 | 15.30951054 | 8.235330779 | 12.88794549 | 4.761432801 |

| hsa-miR-10b-3p | hsa-miR-500a-3p | hsa-miR-224-5p | hsa-miR-424-3p | hsa-miR-7706 |
|----------------|-----------------|----------------|----------------|--------------|
| 3.912814192    | 9.740525587     | 6.965210358    | 4.172486504    | 3.900986213  |
| 4.68435656     | 10.54761043     | 8.150235271    | 3.208051195    | 2.357401462  |
| 6.322172946    | 10.40730158     | 8.578194206    | 3.80154138     | 3.848701033  |
| 3.239800977    | 10.56069262     | 10.54033294    | 4.297943792    | 2.788183137  |
| 7.27340518     | 10.94180009     | 7.875837098    | 3.995928728    | 4.41128986   |
| 2.488776357    | 9.71620961      | 4.647706303    | 3.501305427    | 3.765331923  |
| 3.589879628    | 10.23344123     | 4.758331964    | 3.810347177    | 4.004077019  |
| 1.391136827    | 10.40088242     | 11.40181828    | 4.182996481    | 3.822268651  |
| 1.679522961    | 10.60273431     | 9.79921082     | 2.94917265     | 3.321811197  |
| 7.309159546    | 10.44593944     | 6.21968689     | 3.15069008     | 3.468251635  |
| 3.911966722    | 10.21175316     | 8.827525624    | 3.375148217    | 0.129012527  |
| 2.453585156    | 11.50781006     | 9.631660369    | 5.726937328    | 3.959993876  |
| 4.920033099    | 10.69842773     | 11.52799861    | 3.922702587    | 3.246877951  |
| 4.37321409     | 11.40235647     | 11.04423749    | 3.354345059    | 3.525628641  |
| 5.341005184    | 10.31499184     | 11.20024376    | 3.122197144    | 3.411189524  |
| 4.003608884    | 9.413983954     | 6.081027958    | 3.205742247    | 3.401062854  |
| 5.55184393     | 10.81468746     | 9.243968278    | 3.509686743    | 2.700728416  |
| 4.460458257    | 12.62469275     | 6.882209837    | 2.023944707    | 4.612808534  |
| 0.155446239    | 10.90568965     | 11.02050762    | 1.469411949    | 2.929961147  |
| 6.18812228     | 10.01341837     | 7.348895187    | 4.941808667    | 2.532194492  |
| 6.150952383    | 10.66884255     | 11.13802227    | 3.033539714    | 3.857616177  |
| 4.404318716    | 9.851258545     | 7.720768772    | 3.371772004    | 4.036827825  |
| 7.114169811    | 12.20943929     | 8.602739296    | 3.40704606     | 3.407718381  |
| 0.240071163    | 10.36056938     | 11.08733664    | 4.38797512     | 2.847698727  |
| 2.601789652    | 10.58050391     | 8.67169197     | 3.95027545     | 4.102536966  |
| 1.70442372     | 10.20615522     | 4.901905208    | 5.333581364    | 3.006248658  |
| 6.105156083    | 11.83492589     | 9.986561407    | 2.37449991     | 5.518372107  |
| 6.646347719    | 10.2984833      | 6.929279461    | 4.45871165     | 2.33311404   |
| 2.847206499    | 11.39553028     | 11.18559678    | 2.846086769    | 3.975866287  |
| 0.790851179    | 11.32038129     | 11.06903619    | 4.457626081    | 3.248089062  |
| 5.587811073    | 11.13233376     | 10.21332239    | 3.767302749    | 4.059321048  |
| 8.231347137    | 11.38907655     | 9.872278184    | 2.484030665    | 4.083971414  |
| 6.759083104    | 10.44911918     | 9.062155304    | 3.773090881    | 3.109616049  |
| 3.36109781     | 9.48144656      | 10.45063205    | 4.529693992    | 2.796392677  |
| 8.240097269    | 10.50933547     | 10.1538626     | 2.776078011    | 2.77701694   |
| 3.877510437    | 10.49233447     | 8.774109829    | 0.735057363    | 3.733240468  |
| 4.213532288    | 10.49959471     | 11.40063823    | 2.005990104    | 3.663107207  |
| 2.081029072    | 11.76046604     | 10.70594396    | 3.260834058    | 2.406634686  |
| 7.468004566    | 10.29413431     | 8.519065537    | 4.708584688    | 4.051847059  |
| 1.089948276    | 9.782270294     | 8.680767457    | 5.093570633    | 1.695119101  |
| 5.773728181    | 9.645118786     | 9.531956359    | 3.571141096    | 3.091517876  |
| 5.169981407    | 11.02540387     | 10.74125828    | 3.623726263    | 3.207813213  |
| 3.181345887    | 11.85301762     | 9.428558132    | 2.107803042    | 2.89849597   |
| 5.832041182    | 13.19316379     | 8.056694315    | 2.303841705    | 3.617958972  |
| 6.780631068    | 10.55666737     | 10.2913863     | 2.652395608    | 3.502226894  |
| 0              | 9.955753077     | 8.134100751    | 3.452950294    | 2.461704281  |
| 5.766114304    | 10.49583298     | 8.613320569    | 3.043006632    | 1.859554292  |
| 6.022801597    | 10.45603167     | 10.5025611     | 3.326055403    | 2.819698798  |
| 6.644116916    | 10.37268405     | 6.701802769    | 3.34977385     | 3.669791369  |
| 2.393789823    | 9.353333968     | 4.269751987    | 5.195983686    | 2.391046731  |
| 1.986285625    | 10.91074088     | 5.147883575    | 3.043993363    | 3.271431568  |
| 2.916079974    | 9.155941831     | 5.750828796    | 6.283870001    | 1.954352768  |
| 7.274922535    | 10.7385313      | 9.379122929    | 3.724560119    | 3.954638936  |
| 0.181096208    | 10.88377852     | 9.39036807     | 5.398000098    | 3.522971516  |
| 4.49035971     | 9.507874509     | 9.013830811    | 3.62139954     | 3.157715235  |
| 5.736610227    | 12.95911698     | 8.677725065    | 4.224758308    | 2.978296197  |

|             |             |             |             |             |
|-------------|-------------|-------------|-------------|-------------|
| 0.120325937 | 9.901782806 | 7.066445675 | 3.686574363 | 4.10611144  |
| 6.718943051 | 10.3617495  | 3.377755184 | 4.318365429 | 2.415077939 |
| 0.007287673 | 10.32001961 | 5.247913193 | 3.62145563  | 3.943588127 |
| 4.266852319 | 12.0926033  | 9.227677438 | 2.897530237 | 2.897246305 |
| 2.661122172 | 11.1211952  | 8.304873343 | 5.007301261 | 3.564143794 |
| 4.138601099 | 10.81668262 | 6.434118625 | 0.092086317 | 4.431939442 |
| 3.844410034 | 10.11325277 | 8.526897823 | 3.205603366 | 4.737549979 |
| 6.362250037 | 11.57704791 | 9.112089987 | 5.482072693 | 3.084716818 |
| 2.773664008 | 11.0297247  | 8.089956031 | 3.833466514 | 3.181546675 |
| 5.461604159 | 10.89400188 | 11.81158408 | 4.089556419 | 2.001797421 |
| 1.524925753 | 9.818558801 | 8.388257024 | 3.006365379 | 0.166610666 |
| 1.468489824 | 11.85849707 | 6.23409321  | 4.170486057 | 4.019728564 |
| 4.084987952 | 11.48184701 | 9.188948107 | 4.069088905 | 1.67455044  |
| 6.340062098 | 10.55488322 | 9.508578989 | 4.171023691 | 2.602099491 |
| 5.383618133 | 9.802427959 | 8.269084926 | 3.89599956  | 3.704418472 |
| 5.348284595 | 11.84082563 | 9.381403154 | 2.184378304 | 5.300576753 |
| 1.151376846 | 10.15926457 | 5.664339717 | 3.024050238 | 5.087483464 |
| 4.61629117  | 11.66243263 | 9.13028997  | 3.55553897  | 1.755785617 |
| 4.827040394 | 11.22703487 | 10.991389   | 2.889319972 | 3.709726813 |
| 7.177579953 | 10.52285317 | 8.053403685 | 3.510537407 | 2.716464117 |
| 2.981011864 | 10.9662702  | 10.12820776 | 2.980106729 | 3.345811642 |
| 6.120035978 | 11.72673485 | 9.099930613 | 2.723226558 | 4.492519926 |
| 6.952288475 | 10.64264949 | 8.728186044 | 4.778514047 | 3.524646888 |
| 5.230978815 | 10.2496774  | 9.252346762 | 2.565949753 | 2.23386673  |
| 5.396160653 | 9.860920453 | 6.624467103 | 3.882291148 | 3.702997853 |
| 5.877165224 | 10.96269201 | 5.057904236 | 3.672222894 | 3.556986407 |
| 1.662878664 | 11.67558999 | 10.11386446 | 4.23253195  | 4.542917612 |
| 5.504756909 | 10.11482013 | 8.057084139 | 3.274817563 | 3.274404173 |
| 5.986096146 | 9.596386131 | 4.586176955 | 4.293919514 | 3.318523248 |
| 0           | 11.14948972 | 6.107310904 | 1.731687463 | 3.386650524 |
| 5.616033807 | 11.40010402 | 9.752469096 | 4.003511932 | 2.042593604 |
| 7.093791095 | 11.64658437 | 9.847724864 | 3.126846856 | 4.362530335 |
| 1.948318367 | 11.80872291 | 10.51093424 | 2.673438904 | 3.492165964 |
| 3.172138563 | 10.09781006 | 9.081896001 | 3.324145366 | 2.587064146 |
| 6.916636904 | 11.41076605 | 11.22822397 | 4.012621173 | 3.570779413 |
| 4.938619375 | 11.8037662  | 9.110885751 | 0.195589482 | 4.520279623 |
| 4.54985921  | 9.809469069 | 8.865465432 | 3.503451166 | 1.430102921 |
| 5.16480287  | 11.53100171 | 9.251624114 | 3.394836458 | 3.532467059 |
| 4.847448913 | 10.83128026 | 9.408644829 | 3.103496554 | 2.35210843  |
| 7.792165543 | 10.78575739 | 8.79316661  | 4.209318067 | 4.344227178 |
| 2.947851505 | 9.961840587 | 9.066818588 | 5.973732223 | 3.099514834 |
| 4.234386788 | 10.25698884 | 8.154346851 | 3.581254315 | 3.733727274 |
| 7.482876573 | 11.27900291 | 12.45770123 | 3.41406532  | 3.539547925 |
| 6.522329352 | 10.46336973 | 7.637827173 | 4.01465288  | 2.909368243 |
| 5.308998653 | 9.781139106 | 9.730013546 | 2.925259496 | 3.621449653 |
| 0.826666797 | 8.862750665 | 9.92900607  | 1.761790635 | 1.367346114 |
| 5.23016941  | 11.10076849 | 7.181584932 | 2.791198382 | 4.230806173 |
| 2.76132757  | 9.289489934 | 8.831309818 | 2.910408902 | 2.911487485 |
| 5.358725246 | 12.27800308 | 9.392030113 | 2.937784661 | 3.860011011 |
| 8.005659329 | 10.21636025 | 9.723298966 | 4.837279891 | 4.572655339 |
| 5.42050784  | 9.850578791 | 6.151120734 | 3.518955857 | 3.644512854 |
| 4.68067143  | 10.48649449 | 7.37020954  | 4.915848091 | 1.323704265 |
| 2.818675038 | 10.15722426 | 5.845350608 | 4.761175301 | 2.629720445 |
| 4.625054867 | 9.728041485 | 4.27862964  | 4.344654378 | 3.911078089 |
| 6.97877293  | 10.10355295 | 8.567649142 | 4.207029891 | 4.857027288 |
| 4.779305184 | 11.53096927 | 11.44705834 | 3.983287542 | 3.396396532 |
| 4.7124949   | 9.117416028 | 8.697557719 | 4.584651227 | 2.434122419 |
| 5.458522188 | 10.24277991 | 5.580349491 | 3.574144643 | 2.998769329 |

|             |             |             |             |             |
|-------------|-------------|-------------|-------------|-------------|
| 3.891178927 | 11.70623568 | 7.045954715 | 3.356680357 | 4.065943652 |
| 4.509080131 | 10.53225992 | 10.92441463 | 4.315019544 | 2.78907344  |
| 6.053605663 | 10.49558058 | 9.328649227 | 3.397196251 | 2.875707131 |
| 3.967065326 | 10.0493916  | 8.991652161 | 3.584794574 | 3.129683002 |
| 3.730519961 | 11.48956998 | 6.783040149 | 4.316271016 | 3.602083612 |
| 4.070858415 | 10.99513723 | 9.589740923 | 3.936314116 | 3.465357411 |
| 4.203227198 | 10.4738881  | 10.16851854 | 4.394550431 | 4.30807293  |
| 5.813548798 | 10.74570857 | 4.773705693 | 3.258327227 | 3.627961467 |
| 4.118688918 | 11.54590042 | 9.387988498 | 3.351948673 | 2.349634124 |
| 4.063333983 | 11.09742319 | 13.18568262 | 2.553196875 | 5.682484131 |
| 4.338208488 | 9.962340921 | 10.3232492  | 3.321036403 | 4.580324968 |
| 5.017488814 | 10.1875679  | 10.05359849 | 4.291490599 | 2.177306276 |
| 0.094888255 | 11.00116662 | 9.595395588 | 3.41526006  | 3.880708223 |
| 6.870843577 | 9.767308227 | 9.909322431 | 3.748397016 | 2.629766218 |
| 3.135862976 | 11.1442266  | 10.24581494 | 3.306236873 | 4.388407495 |
| 0.082656898 | 11.21052501 | 10.01395663 | 4.286061574 | 3.36498825  |
| 5.142176569 | 10.62070247 | 8.994670819 | 4.289917315 | 3.881304521 |
| 7.505903498 | 10.60979628 | 8.411864062 | 4.551840146 | 5.230184574 |
| 2.857359625 | 9.634825089 | 6.631428969 | 3.384382455 | 3.295349939 |
| 5.758888226 | 10.34131701 | 5.720443557 | 2.936651771 | 2.804624429 |
| 4.50319365  | 10.5669547  | 5.92682611  | 3.487661157 | 2.286407629 |
| 5.549384631 | 9.430217519 | 9.555138687 | 4.023489383 | 2.68207563  |
| 1.133190147 | 10.2971542  | 5.296738919 | 3.783964468 | 2.997953075 |
| 3.008512909 | 12.35182923 | 13.8802049  | 3.374404783 | 4.670518126 |
| 1.498886498 | 10.39444981 | 9.068062822 | 2.176231255 | 3.678640141 |
| 3.100093536 | 10.77713343 | 8.31437984  | 5.149746122 | 3.099137417 |
| 5.738246028 | 9.784798462 | 5.263043824 | 3.717193235 | 3.909736912 |
| 4.274290417 | 11.85683804 | 10.68305968 | 4.146475165 | 3.574258603 |
| 3.9130821   | 10.27095812 | 9.518264825 | 3.813458096 | 3.912982152 |
| 5.03774036  | 9.715368469 | 4.37600686  | 3.102028982 | 5.189060611 |
| 1.628186548 | 11.27495566 | 10.06581796 | 2.322372869 | 1.633563726 |
| 3.401206191 | 10.83696279 | 5.638958028 | 3.680163418 | 4.174550372 |
| 6.2171842   | 10.95119904 | 11.79192871 | 2.398048911 | 2.662982364 |
| 4.649017892 | 10.97091085 | 6.249539192 | 1.386295902 | 2.827591338 |
| 1.852682419 | 9.78393486  | 9.493963691 | 4.308834306 | 3.980146518 |
| 5.14708744  | 12.33953629 | 9.021063818 | 4.421821443 | 3.798313231 |
| 4.387811966 | 8.89017608  | 9.834545154 | 4.88301186  | 3.455518291 |
| 6.671969951 | 11.42094269 | 10.36536448 | 3.976657221 | 2.253224889 |
| 3.216379295 | 9.227595649 | 8.999914064 | 4.073118767 | 3.08281184  |
| 4.211310139 | 11.04366906 | 9.502534002 | 3.997792341 | 4.657394641 |
| 6.804929792 | 9.26016344  | 8.76668661  | 4.594501906 | 1.781030404 |
| 4.676069482 | 13.6854641  | 9.104681659 | 3.586582183 | 2.028338383 |
| 5.813344455 | 9.624498174 | 9.466367366 | 5.394049612 | 2.660175116 |
| 5.63715048  | 10.27230494 | 11.23527636 | 3.435248728 | 3.761240659 |
| 6.075046197 | 10.39273018 | 8.887079125 | 4.571452043 | 4.387633846 |
| 4.81300503  | 9.311005247 | 8.478571327 | 4.790549977 | 3.637339292 |
| 5.769605623 | 10.58950238 | 9.339338041 | 3.185863982 | 3.18427577  |
| 2.638864707 | 11.46604811 | 9.521191636 | 2.638075912 | 3.135401295 |
| 6.418855912 | 9.976843683 | 8.652020761 | 2.805277967 | 4.035897031 |
| 1.998372562 | 11.87556158 | 8.046472745 | 3.057429014 | 1.999514772 |
| 5.331950826 | 12.18563221 | 10.5910765  | 3.869508362 | 3.610019238 |
| 7.494511239 | 10.58187083 | 10.58939832 | 4.297575081 | 3.358081676 |
| 5.010156552 | 11.10669265 | 11.79659806 | 1.375345507 | 3.689535575 |
| 5.609971745 | 10.14536877 | 8.330589312 | 2.383034088 | 3.702862478 |
| 3.67809201  | 12.31803854 | 6.846197817 | 3.498071791 | 4.091542724 |
| 4.593417192 | 9.740451511 | 8.792376246 | 2.778491505 | 1.994759968 |
| 5.821840937 | 11.34170982 | 10.55835446 | 2.981684096 | 3.640190149 |
| 3.374733721 | 10.73864228 | 10.80453212 | 3.369216277 | 3.894178807 |

| hsa-miR-490-3p | hsa-miR-183-5p | hsa-miR-532-5p | hsa-miR-452-5p | hsa-miR-96-5p |
|----------------|----------------|----------------|----------------|---------------|
| 0.108370222    | 13.01669882    | 12.07186147    | 8.914264238    | 5.787837693   |
| 0.006451093    | 11.57026669    | 12.20986102    | 9.268182003    | 4.288121728   |
| 0              | 15.39938552    | 12.21071625    | 9.462831008    | 6.319273604   |
| 0              | 8.484489864    | 12.58032175    | 11.44907606    | 0             |
| 0.014774051    | 13.54418904    | 12.03838425    | 9.025383315    | 3.547942078   |
| 1.72766352     | 15.04224122    | 12.51866865    | 6.322078997    | 7.568038092   |
| 0.204886805    | 11.95280325    | 12.83085952    | 6.737308164    | 4.640584162   |
| 3.532754653    | 17.47416117    | 12.44391683    | 10.8674877     | 9.324918089   |
| 0              | 11.57083817    | 13.97461573    | 9.4705898      | 4.066056604   |
| 0              | 14.17823615    | 11.91636365    | 7.351105442    | 5.467204746   |
| 3.696026619    | 10.97874622    | 10.80380384    | 8.604969949    | 2.871199574   |
| 4.709001825    | 14.31352985    | 11.56170174    | 9.402603581    | 6.088052455   |
| 1.936222139    | 9.978602792    | 13.68583063    | 11.91788121    | 3.623156005   |
| 0.064267258    | 17.02861508    | 12.65487702    | 12.16244346    | 7.205951259   |
| 0              | 13.94763483    | 13.29696878    | 11.28407647    | 5.755710168   |
| 1.912761601    | 13.19346965    | 13.07890135    | 7.45201817     | 5.861556056   |
| 0.704506064    | 9.517602027    | 12.27680722    | 9.968066378    | 2.351996174   |
| 0              | 9.916995868    | 12.39232872    | 6.563214288    | 1.330078285   |
| 0.121887896    | 13.68451312    | 12.10902615    | 10.62902622    | 5.97302524    |
| 5.853790579    | 12.58916851    | 12.62486454    | 8.323074506    | 5.262388061   |
| 2.183679913    | 8.64605999     | 13.70118727    | 11.44464418    | 0.512760048   |
| 0.107495125    | 18.09594307    | 9.886977935    | 6.88727298     | 9.585236558   |
| 0              | 8.070595624    | 14.97598823    | 10.2248996     | 0.887732573   |
| 3.121789326    | 13.45911544    | 11.95271276    | 10.68865073    | 6.867716331   |
| 0              | 15.10621779    | 12.76019336    | 9.929979999    | 6.723865517   |
| 1.920887821    | 14.86151204    | 12.58407761    | 6.533947612    | 6.601430647   |
| 0.00957149     | 12.65098423    | 13.45331455    | 10.76567488    | 3.379172633   |
| 0.169480471    | 10.96618465    | 13.1594429     | 8.219496725    | 3.871272795   |
| 0.048001306    | 16.81394217    | 13.90488556    | 11.57924639    | 9.520178628   |
| 0              | 8.79463191     | 12.91035056    | 10.97588379    | 0.791763025   |
| 0.112150309    | 12.72292994    | 13.60182008    | 10.08177394    | 5.923436878   |
| 0.030080364    | 12.15162447    | 13.17601579    | 10.66509372    | 3.498000129   |
| 0.055218011    | 14.18289878    | 11.59550535    | 10.65199313    | 6.963830839   |
| 0              | 15.22258632    | 12.03805686    | 9.935002397    | 8.464340818   |
| 0              | 14.63985585    | 12.62824118    | 10.61370661    | 7.626871596   |
| 0              | 15.94370631    | 12.26107116    | 10.29766675    | 7.160774756   |
| 0.091429905    | 7.236938889    | 12.92414001    | 12.688817      | 2.450496728   |
| 0.015540951    | 14.83796763    | 12.06538047    | 10.34747059    | 7.132067832   |
| 1.163536716    | 12.21933271    | 11.82063459    | 10.46787766    | 4.500654087   |
| 0.022948275    | 11.85397107    | 11.965929      | 8.637344462    | 5.428306986   |
| 0              | 13.45507422    | 11.61206823    | 11.03026551    | 6.50457469    |
| 0.006434602    | 8.721117961    | 12.87282105    | 10.88089673    | 0.007800002   |
| 0.114999663    | 14.3899431     | 14.17306545    | 9.983688392    | 7.0829701     |
| 0.161848613    | 11.85428237    | 14.84257498    | 9.510007829    | 4.957082403   |
| 0.136084209    | 9.31825526     | 12.35553232    | 11.60581371    | 0.17652995    |
| 0              | 13.44282092    | 12.24322953    | 10.07689044    | 4.815493216   |
| 0.228977054    | 7.45542791     | 12.81817165    | 10.79437605    | 0.312593116   |
| 2.786133398    | 12.53778469    | 12.67097065    | 11.28578992    | 4.641489574   |
| 0              | 13.47055402    | 13.38301832    | 7.79654952     | 5.857931267   |
| 4.534363052    | 8.703971832    | 11.45400595    | 6.579651096    | 2.860889392   |
| 0.087305476    | 13.29135732    | 12.28903603    | 6.578762649    | 4.822851029   |
| 4.963263055    | 11.41088923    | 11.34924011    | 8.174899578    | 2.916479322   |
| 4.414150426    | 14.6069558     | 13.20955941    | 9.508468684    | 5.237447646   |
| 0.140639243    | 12.37890863    | 11.91487885    | 9.241235391    | 4.341640409   |
| 0.027689536    | 9.219062987    | 11.77757094    | 10.23682213    | 1.107846472   |
| 0.781887753    | 10.05668522    | 15.19616819    | 9.385417148    | 2.009456587   |

|             |             |             |             |             |
|-------------|-------------|-------------|-------------|-------------|
| 1.360685474 | 11.90610107 | 12.77338106 | 7.854895376 | 5.070214287 |
| 1.127029159 | 14.27436466 | 12.89368515 | 6.352516606 | 5.612116787 |
| 4.426443804 | 12.27048954 | 12.94616023 | 6.465193599 | 2.842406152 |
| 0.015779663 | 16.03219644 | 12.87176682 | 10.78843005 | 7.744089976 |
| 4.165452003 | 15.85751337 | 13.45650119 | 10.40675819 | 7.634347423 |
| 0.077079514 | 8.920151948 | 14.1185415  | 7.15916964  | 0.096905015 |
| 0.006034024 | 10.50672462 | 11.97613804 | 10.26311266 | 2.355099048 |
| 0           | 14.10104417 | 13.19108787 | 9.910429177 | 5.450065288 |
| 0.749219451 | 15.2485254  | 12.53662359 | 7.796330072 | 8.160681356 |
| 3.461336154 | 9.690467468 | 11.63339577 | 12.39426735 | 1.001335215 |
| 1.510838474 | 9.543744372 | 11.8061132  | 8.863740855 | 0.179482941 |
| 0.905125133 | 14.41117429 | 12.34310048 | 5.749324374 | 6.48582982  |
| 4.268114131 | 11.31489799 | 11.90184182 | 8.588568117 | 3.469549198 |
| 2.134434812 | 13.06164231 | 12.99720443 | 10.66105088 | 5.05729153  |
| 4.990616795 | 13.3777966  | 12.074961   | 9.106339886 | 5.698527847 |
| 0.035855093 | 8.856944184 | 13.67670868 | 10.88867088 | 1.139283188 |
| 0.038816738 | 14.06024642 | 12.27373498 | 7.317648757 | 6.854121079 |
| 0.200062236 | 11.24968212 | 12.69909599 | 10.6228518  | 5.134729911 |
| 0           | 13.95781744 | 12.34706174 | 10.49804204 | 6.232385584 |
| 1.359076863 | 9.647971434 | 12.41412197 | 9.926520148 | 2.52776025  |
| 1.119614798 | 15.6066838  | 11.95930155 | 11.20783935 | 5.804765097 |
| 0.152344255 | 11.99560193 | 13.18141457 | 10.30408656 | 4.911721591 |
| 3.280263614 | 12.97514462 | 13.39283963 | 9.004820952 | 4.870980453 |
| 0.045918042 | 14.0121126  | 13.00644661 | 9.998087717 | 7.101307328 |
| 1.504676072 | 9.665118106 | 12.35205265 | 7.879590455 | 1.515791869 |
| 0           | 14.6351323  | 13.42686695 | 6.569893684 | 7.149929504 |
| 2.801134244 | 14.10179151 | 13.78738818 | 10.6375743  | 5.383114178 |
| 0.017980037 | 11.02325543 | 12.53642786 | 8.502676833 | 3.27553961  |
| 0           | 14.74205699 | 11.88399106 | 6.537388599 | 6.417216937 |
| 0.803427636 | 7.861724373 | 13.69996307 | 6.771648728 | 0           |
| 0.09998685  | 15.7095427  | 13.47865904 | 8.718945445 | 8.055677598 |
| 0           | 15.17480787 | 12.5845609  | 9.655076659 | 6.876550017 |
| 0.254842292 | 13.48392431 | 13.66037423 | 10.59580456 | 5.689799757 |
| 1.001463035 | 8.478142859 | 12.74766862 | 10.75813551 | 1.001452908 |
| 0.205149944 | 15.0890785  | 13.32549756 | 10.38844393 | 7.662271651 |
| 0.158473444 | 15.60804977 | 13.52487198 | 9.252985625 | 7.502594485 |
| 0.875129947 | 13.30341835 | 11.94602122 | 9.622990294 | 6.53200049  |
| 0.012323441 | 14.6878467  | 13.8811086  | 10.17464146 | 6.537824083 |
| 0           | 14.58672356 | 12.92475869 | 10.2115543  | 5.439756664 |
| 0           | 17.23784614 | 12.39899    | 10.30550019 | 7.512914182 |
| 4.485779198 | 9.598446207 | 12.98471561 | 8.960783668 | 1.806933783 |
| 0.074692491 | 13.44286636 | 12.54665955 | 9.698160389 | 6.223087843 |
| 0           | 9.140760695 | 14.11326441 | 13.5621439  | 2.763662761 |
| 0.017949055 | 12.20877138 | 11.79592488 | 8.869407168 | 3.104234894 |
| 0           | 12.7166096  | 12.918378   | 10.19556899 | 4.242003607 |
| 1.768909409 | 14.43258114 | 10.49366834 | 10.60548211 | 7.638881439 |
| 0           | 9.217857375 | 12.49727554 | 8.611210681 | 0.989093911 |
| 1.267011465 | 12.14753248 | 11.76378175 | 10.13093982 | 5.283413508 |
| 0           | 13.71592964 | 14.204755   | 11.35268645 | 5.684064219 |
| 2.420645679 | 14.42021891 | 12.60079802 | 10.69211272 | 6.069058253 |
| 0.009972303 | 10.83169403 | 12.18718112 | 8.162225187 | 1.632747944 |
| 0.523102232 | 8.935894641 | 12.35446803 | 9.462296623 | 1.331169609 |
| 3.911428333 | 10.64402045 | 12.20441246 | 6.753966129 | 2.629261622 |
| 0           | 15.78458358 | 11.3054098  | 5.622151034 | 6.27362226  |
| 1.150169308 | 14.9216987  | 12.23400729 | 10.27385535 | 6.332245643 |
| 1.644209139 | 15.41791001 | 12.44955746 | 11.05713951 | 6.900679579 |
| 0.020684976 | 12.0598843  | 10.74087877 | 9.219044708 | 4.935648989 |
| 0           | 12.41398437 | 12.3521413  | 7.795324707 | 4.60851537  |

|             |             |             |             |             |
|-------------|-------------|-------------|-------------|-------------|
| 2.915619516 | 11.92140251 | 12.72165965 | 6.917103853 | 4.576642988 |
| 2.119600922 | 15.47695501 | 11.93541535 | 11.56868973 | 5.518111905 |
| 2.316275345 | 14.4714114  | 12.29665056 | 11.05208779 | 7.016318551 |
| 0.427347439 | 13.62309734 | 12.83536777 | 9.934366004 | 5.652379178 |
| 1.095430049 | 13.27923241 | 13.20938762 | 7.605382973 | 5.008859337 |
| 0.086564807 | 16.45795104 | 12.7089132  | 10.17314987 | 8.335269456 |
| 0           | 13.99307123 | 12.09434667 | 11.28463573 | 6.437380613 |
| 0           | 11.95385681 | 13.00540508 | 6.251393545 | 4.48006711  |
| 1.60870344  | 12.39297261 | 12.41529773 | 8.924410968 | 5.119399228 |
| 0.04342455  | 8.487933606 | 12.89120469 | 12.14772448 | 0.053646308 |
| 0.057873538 | 13.65323214 | 11.31118595 | 10.3189772  | 4.510203748 |
| 0.034494752 | 11.44012411 | 12.23573668 | 10.61050172 | 4.45613326  |
| 0.076148384 | 16.81071818 | 11.94969788 | 9.965772108 | 8.700182419 |
| 1.62233738  | 12.89942339 | 12.14182653 | 11.74529119 | 6.004859244 |
| 4.128724833 | 14.89569043 | 12.8253922  | 10.48228589 | 7.287356465 |
| 0.066649158 | 11.92193095 | 12.48544747 | 9.147572209 | 4.292538916 |
| 3.610620396 | 13.10866232 | 12.45187631 | 10.38752229 | 4.33357371  |
| 1.150914925 | 15.57052746 | 11.31792831 | 10.42970073 | 5.523235452 |
| 0           | 17.08452335 | 10.29795877 | 7.638604046 | 7.938810397 |
| 0           | 14.83581237 | 12.36263077 | 7.275916949 | 6.850775812 |
| 0.056709803 | 10.72274644 | 12.42221651 | 7.45364193  | 3.12040262  |
| 0           | 13.65593073 | 10.85156562 | 11.35102477 | 4.593119544 |
| 3.350960261 | 13.76443728 | 12.05927162 | 6.515676915 | 5.825033987 |
| 0.035726332 | 15.05117046 | 12.98739477 | 11.76312183 | 6.63035531  |
| 1.4863358   | 10.94197527 | 12.74887568 | 9.635350439 | 2.977903787 |
| 5.710237825 | 12.56256456 | 11.8707762  | 8.181248438 | 4.861957129 |
| 0           | 15.84579941 | 10.58400766 | 6.659195057 | 6.364150542 |
| 1.404105928 | 13.7321928  | 13.55958942 | 12.07231553 | 6.431661644 |
| 4.590640548 | 10.14734516 | 12.37229444 | 10.71387502 | 2.813166098 |
| 0.243657285 | 11.48910539 | 12.9230776  | 6.624251973 | 3.99588616  |
| 0.166372085 | 11.1531371  | 11.83495713 | 10.88305972 | 3.419009177 |
| 0.752238659 | 14.76464333 | 12.52186236 | 6.312159224 | 5.947475362 |
| 1.054700558 | 14.45522005 | 13.42727153 | 12.18209769 | 7.207468246 |
| 0.099704762 | 7.921792213 | 13.78896623 | 7.791330076 | 0.126851977 |
| 1.864636474 | 7.93925796  | 13.02988034 | 10.65628004 | 1.186108636 |
| 1.0645915   | 9.669397161 | 13.31327003 | 10.97257039 | 1.663478665 |
| 0.05091412  | 10.91400279 | 11.87403554 | 11.10427557 | 3.459483228 |
| 0.645170077 | 12.68101513 | 12.83004436 | 11.35744828 | 5.636182465 |
| 2.587519879 | 14.61536388 | 11.45647258 | 9.809129058 | 7.404918669 |
| 0.656368958 | 14.88115143 | 13.0025908  | 10.22178906 | 6.995230074 |
| 0           | 15.47466756 | 11.4886891  | 10.78474822 | 7.546936047 |
| 3.107282249 | 9.524216082 | 14.00338518 | 8.653038474 | 0.387855287 |
| 2.447429988 | 12.08410035 | 11.97308472 | 11.15519301 | 4.362508746 |
| 0.080099945 | 9.073626566 | 13.70009959 | 11.30373208 | 2.736552731 |
| 0.954424385 | 14.5414163  | 12.58718421 | 9.230217158 | 6.745013835 |
| 1.086209258 | 17.07422738 | 10.98594828 | 9.595298513 | 7.525690548 |
| 0.069804445 | 13.82834205 | 13.31131639 | 10.27405791 | 6.701327053 |
| 0.060213348 | 15.42648854 | 11.80087808 | 9.886131248 | 6.96267802  |
| 2.293324202 | 14.69619851 | 12.52539921 | 8.672679845 | 6.660825895 |
| 3.444631524 | 12.00059538 | 11.35975524 | 7.495703758 | 4.600097976 |
| 0           | 16.54959256 | 13.96461023 | 10.61410816 | 8.941327006 |
| 3.175923972 | 15.57415765 | 12.72338064 | 10.18868552 | 7.337391874 |
| 0.096799631 | 8.767222611 | 13.73161127 | 12.0005254  | 1.369492951 |
| 0.181288685 | 10.09637725 | 12.70255799 | 10.31274907 | 3.48590709  |
| 0.092688785 | 13.78706293 | 12.82889456 | 5.895670966 | 4.613807824 |
| 1.975720969 | 12.02942304 | 11.56957226 | 10.3464379  | 4.594393438 |
| 0           | 15.23519684 | 13.06080135 | 11.39637424 | 7.307046944 |
| 0.106962042 | 15.29405078 | 13.19531802 | 10.58799323 | 6.784602807 |



| hsa-miR-501-3p | hsa-miR-103a-3p | hsa-miR-182-5p | hsa-miR-139-5p | hsa-miR-450a-5p |
|----------------|-----------------|----------------|----------------|-----------------|
| 7.269961824    | 15.83275034     | 15.11748311    | 9.631854355    | 6.345345909     |
| 7.942541761    | 16.3967951      | 13.93294014    | 9.692818819    | 5.085133502     |
| 8.282616886    | 16.37235283     | 16.17764993    | 7.780360737    | 5.176801503     |
| 7.769366329    | 16.55044212     | 9.800648632    | 7.564677995    | 5.322502954     |
| 8.149762087    | 17.50897823     | 14.58776572    | 7.971005466    | 3.789881585     |
| 7.363726404    | 16.31471155     | 16.63472534    | 9.28459258     | 5.143827129     |
| 7.524308586    | 17.66389667     | 13.65544513    | 9.64221086     | 4.36540668      |
| 7.606674649    | 16.96757663     | 18.51309405    | 8.353563011    | 5.973963572     |
| 8.026433076    | 16.25346369     | 13.27319353    | 8.686731848    | 3.081973971     |
| 8.484368604    | 16.89239745     | 14.77541627    | 7.305761935    | 4.629658502     |
| 7.254538401    | 16.24574828     | 13.7513456     | 9.628146169    | 6.371518763     |
| 8.288517798    | 16.98547524     | 16.49453182    | 10.03334629    | 7.599465779     |
| 7.449591001    | 17.21293358     | 11.44044944    | 10.58059897    | 5.129297228     |
| 8.07494581     | 17.1429008      | 18.15197466    | 6.761870862    | 3.825615458     |
| 7.755096903    | 16.58432476     | 15.42245502    | 5.15810655     | 3.410616616     |
| 6.724719677    | 16.78888415     | 14.92945962    | 9.775505451    | 4.820229206     |
| 7.683171384    | 16.13451818     | 11.62065509    | 9.480283985    | 6.008186        |
| 9.906828348    | 17.42492258     | 11.32969007    | 6.199620013    | 2.492470288     |
| 8.010172942    | 16.46835034     | 15.70755964    | 7.410604408    | 3.979300088     |
| 7.539401823    | 16.80982543     | 14.18693895    | 11.01343269    | 6.169054462     |
| 8.127369521    | 16.83841554     | 10.22743546    | 9.886301025    | 4.819507442     |
| 7.175901848    | 17.40280699     | 19.68258117    | 8.798930588    | 5.609718668     |
| 8.874486241    | 16.12067644     | 9.910092235    | 8.174778111    | 4.514668011     |
| 7.516786625    | 15.88901586     | 15.3879217     | 10.25999888    | 5.288387755     |
| 7.745514294    | 17.84789493     | 15.95597716    | 8.588042931    | 4.861032879     |
| 7.512298152    | 16.96974419     | 15.96515711    | 8.089799987    | 6.431649237     |
| 9.862587659    | 17.30441488     | 13.52417912    | 6.690708591    | 4.451851257     |
| 7.501426447    | 16.49911995     | 13.06334005    | 9.604490733    | 4.476150754     |
| 8.445146088    | 17.05242389     | 18.11151118    | 7.392877788    | 4.189356263     |
| 8.615167845    | 16.82383065     | 10.29349356    | 8.873188671    | 6.407520049     |
| 8.38225473     | 16.32503397     | 14.09253321    | 8.098768889    | 5.274696687     |
| 8.87900112     | 18.75028309     | 12.56694122    | 9.476909312    | 3.879521821     |
| 6.979761001    | 17.31374395     | 16.23557896    | 10.4371445     | 4.971798593     |
| 7.058277565    | 16.48863005     | 16.38779123    | 9.571834495    | 6.692885925     |
| 7.208780033    | 15.85605863     | 16.23959268    | 7.641185292    | 5.593028511     |
| 8.359511876    | 15.37519454     | 16.3382283     | 5.730517862    | 3.727736645     |
| 7.011825662    | 16.35922448     | 9.406485696    | 9.719028791    | 4.095841793     |
| 8.95735691     | 16.7583142      | 16.54737526    | 7.087733979    | 5.741481874     |
| 7.82345197     | 17.16782542     | 13.9736066     | 9.267456317    | 5.465561667     |
| 6.536858018    | 16.07637729     | 14.18263446    | 6.58753132     | 7.721141417     |
| 7.140640489    | 15.97131987     | 15.65180797    | 8.642351676    | 5.396052647     |
| 8.429615897    | 16.25632027     | 10.19650667    | 9.327055444    | 4.994782621     |
| 8.376555208    | 17.02729293     | 16.16221751    | 9.252124685    | 3.613637388     |
| 10.36974443    | 17.05615588     | 14.22573447    | 10.77249216    | 4.559026908     |
| 8.324216752    | 16.90259129     | 11.04486551    | 8.036389844    | 4.914345035     |
| 7.509262471    | 16.1542986      | 15.0652035     | 8.412522549    | 4.669286907     |
| 7.206163091    | 16.34837765     | 9.428293688    | 9.089514213    | 3.408632697     |
| 7.912687354    | 16.89059003     | 13.72393581    | 8.957790964    | 4.877326668     |
| 8.401212514    | 17.50250734     | 14.56490615    | 9.029404889    | 5.478825904     |
| 6.879558271    | 16.61516125     | 10.52514563    | 12.00841642    | 6.985578183     |
| 8.336018177    | 16.64394481     | 14.43462616    | 9.082661489    | 5.257957231     |
| 6.958755294    | 15.90003483     | 13.3134649     | 10.3729315     | 7.003965599     |
| 8.788861728    | 17.53694315     | 15.16651656    | 9.630475593    | 5.694094786     |
| 7.99156694     | 16.58917538     | 14.89925639    | 8.150141492    | 7.320058461     |
| 6.616431477    | 16.19927171     | 11.33535929    | 8.081270762    | 4.977262639     |
| 9.811046887    | 16.87977735     | 11.74115608    | 10.07547908    | 5.410513291     |

|             |             |             |             |             |
|-------------|-------------|-------------|-------------|-------------|
| 7.300544776 | 17.22454598 | 14.04072716 | 10.01905238 | 5.068445578 |
| 7.974728962 | 16.45118243 | 15.50005412 | 7.813812676 | 5.456326658 |
| 7.89088083  | 16.18349404 | 12.80289755 | 9.004989639 | 5.286277199 |
| 9.025689939 | 17.2531623  | 17.52313833 | 8.79440159  | 3.553854952 |
| 8.759160206 | 16.53907763 | 17.12014901 | 8.733236449 | 5.914303751 |
| 8.286536881 | 17.65024728 | 9.992562975 | 8.488280312 | 3.753354092 |
| 8.490242697 | 17.17906064 | 11.8376034  | 5.653250426 | 4.285487274 |
| 9.512586578 | 17.37367694 | 14.29238388 | 7.488651423 | 5.880633137 |
| 8.398559611 | 17.45187624 | 17.82858507 | 8.63368989  | 4.964057035 |
| 7.79662676  | 16.5275718  | 12.77577035 | 10.52283554 | 7.100219867 |
| 7.363265517 | 16.55720626 | 10.85965693 | 9.513138827 | 4.840926018 |
| 8.797715902 | 17.12032757 | 16.26868871 | 8.63172362  | 5.797306661 |
| 8.849742879 | 17.13163929 | 13.60948497 | 10.33257433 | 5.266140476 |
| 7.881375749 | 17.14728722 | 14.40496268 | 9.146586994 | 5.87935226  |
| 7.540958222 | 16.77248421 | 14.62336535 | 9.470798565 | 5.891399258 |
| 10.08809511 | 17.94194936 | 9.910662185 | 6.0289138   | 3.530577617 |
| 8.27471363  | 16.61274558 | 15.75438121 | 9.887408972 | 4.989920879 |
| 7.996154333 | 16.39190344 | 12.8274295  | 7.910521188 | 4.734528031 |
| 8.380493909 | 16.6558348  | 15.92536241 | 7.048825963 | 5.368392632 |
| 7.38370205  | 16.63136365 | 11.05270248 | 11.00017554 | 4.598281473 |
| 8.220501473 | 16.52146254 | 16.20970654 | 6.476892567 | 4.355276373 |
| 7.849453673 | 16.49450708 | 14.33293951 | 8.665099259 | 3.967965934 |
| 8.251846572 | 17.45902198 | 13.85992589 | 9.22275456  | 5.386865169 |
| 7.089683187 | 16.24507409 | 15.63851835 | 7.165111579 | 4.077274004 |
| 7.413411158 | 17.2879124  | 11.93398599 | 10.93062389 | 4.191047756 |
| 8.485521378 | 17.6476865  | 15.62406854 | 8.046642916 | 4.140970361 |
| 9.06525923  | 16.37857474 | 14.77905613 | 8.304210304 | 5.823506259 |
| 8.343378218 | 17.61569298 | 11.87601755 | 6.589711228 | 1.671035814 |
| 7.034472829 | 16.13503697 | 15.98292096 | 6.876651004 | 5.113552917 |
| 8.95173807  | 17.67842993 | 9.147270834 | 8.921304763 | 3.011352652 |
| 8.496730831 | 17.73869268 | 17.51927104 | 8.718791634 | 5.781579896 |
| 8.918016924 | 17.42925192 | 16.56192689 | 6.428400499 | 4.306467846 |
| 7.388527222 | 17.5475634  | 15.52922758 | 9.656255359 | 3.517031768 |
| 7.617114625 | 15.84998601 | 10.32321386 | 6.646252949 | 4.757229091 |
| 8.519871233 | 17.87965708 | 17.03300798 | 8.747086168 | 6.031846663 |
| 9.175799149 | 17.11896852 | 17.43783134 | 6.517768264 | 4.543168147 |
| 6.823061145 | 16.24003142 | 15.23372646 | 5.406581407 | 5.078775628 |
| 8.637516635 | 16.45898858 | 15.48188386 | 6.268336627 | 4.245906385 |
| 8.840364259 | 17.04185922 | 15.16190387 | 7.47357276  | 4.579569772 |
| 8.137056985 | 17.0394314  | 18.10567579 | 6.484679115 | 4.491504014 |
| 7.936565935 | 17.02457857 | 11.02391147 | 9.819549898 | 5.119076957 |
| 7.445975628 | 16.89150787 | 14.42330773 | 8.447158149 | 4.335067021 |
| 7.738958907 | 16.73175517 | 10.94524156 | 9.591179858 | 3.953244078 |
| 7.800765114 | 16.75335963 | 13.40198381 | 7.786726454 | 4.502858797 |
| 8.02443018  | 16.38187427 | 13.71965223 | 5.511010529 | 3.69171617  |
| 6.302405983 | 15.26279838 | 16.33912796 | 7.948695303 | 4.567064508 |
| 8.574324212 | 18.35544088 | 11.91514482 | 6.625812387 | 4.304459275 |
| 6.872005624 | 15.92626182 | 13.54916406 | 9.234664254 | 5.142201178 |
| 9.055339921 | 17.24661309 | 14.95967267 | 7.722275211 | 4.369825419 |
| 8.544239121 | 17.02348331 | 14.86489481 | 7.863963742 | 5.923981635 |
| 7.750611485 | 16.02775663 | 11.77730703 | 7.421628458 | 4.454314486 |
| 8.194628484 | 16.86123843 | 11.06606823 | 10.47432874 | 6.883043443 |
| 7.95391189  | 16.86205858 | 12.41937395 | 9.977333294 | 5.846341241 |
| 7.915913452 | 15.69192292 | 15.34012414 | 6.620696756 | 5.339568582 |
| 7.362991334 | 16.09779607 | 16.16468831 | 8.161159104 | 5.057538584 |
| 8.329019957 | 17.69437005 | 16.52864462 | 8.99707024  | 6.327909501 |
| 6.858778144 | 16.25373742 | 14.18847697 | 7.598828796 | 4.882746154 |
| 7.662598355 | 16.81467865 | 13.59253767 | 8.65359628  | 5.673136713 |

|             |             |             |             |             |
|-------------|-------------|-------------|-------------|-------------|
| 8.33823037  | 17.39781309 | 14.44086733 | 10.00110601 | 5.840653324 |
| 7.92245572  | 16.4852604  | 16.13271798 | 8.059197189 | 5.520991957 |
| 7.669165695 | 16.78426414 | 16.01576722 | 7.685937655 | 4.009465386 |
| 7.920698646 | 16.92040026 | 14.61876339 | 8.459964452 | 5.628189119 |
| 8.344151945 | 17.08836364 | 15.23144585 | 9.255209653 | 5.675134117 |
| 8.494936469 | 18.61197616 | 17.48240631 | 6.289069491 | 4.070725041 |
| 7.840240451 | 16.4418527  | 15.29901575 | 8.437551775 | 5.009389664 |
| 7.49394068  | 16.33293226 | 13.74318688 | 8.466387974 | 3.951845867 |
| 8.722593974 | 16.88213251 | 14.93637152 | 8.76732403  | 6.52401949  |
| 9.544945538 | 18.76141064 | 9.667872692 | 5.657279512 | 4.163631905 |
| 7.966806868 | 17.92547232 | 14.69984065 | 6.540084547 | 4.244082005 |
| 7.844686879 | 16.40635509 | 13.01908454 | 7.157479757 | 5.603770325 |
| 8.262193476 | 16.73956994 | 17.67642507 | 7.573266722 | 5.87284751  |
| 7.518769101 | 15.96276052 | 15.28841463 | 8.14400534  | 5.29811155  |
| 8.246791389 | 17.39220295 | 16.66442408 | 10.16725346 | 5.731153676 |
| 8.5365465   | 17.16178274 | 14.5200208  | 10.49826315 | 5.854188381 |
| 7.759632846 | 17.3360398  | 14.18796038 | 8.66419189  | 5.637705054 |
| 7.885435157 | 17.3834353  | 16.96487794 | 8.391644159 | 3.393701748 |
| 6.358048702 | 16.6312979  | 18.31180886 | 6.53608606  | 4.406087493 |
| 7.756372436 | 17.82084216 | 16.14664144 | 8.662719099 | 4.652812629 |
| 7.737594454 | 17.02956981 | 12.64939035 | 10.14238247 | 4.7946386   |
| 7.442364871 | 16.77576675 | 14.63678975 | 5.757367118 | 5.410962621 |
| 7.460709403 | 16.38192645 | 15.17576638 | 10.0225134  | 5.162360054 |
| 9.77194123  | 18.19155642 | 16.59296096 | 8.961252603 | 5.388152621 |
| 7.524686826 | 17.53965537 | 12.46256807 | 9.017370452 | 3.490811401 |
| 7.998435144 | 17.112345   | 14.789557   | 9.759188815 | 7.185291406 |
| 7.931835976 | 16.3901245  | 18.02116577 | 7.25278837  | 3.815513934 |
| 9.044362732 | 16.5693536  | 15.08145038 | 7.818440222 | 5.44746479  |
| 7.457701314 | 16.42643058 | 12.17048284 | 9.960708197 | 5.093816452 |
| 8.27647603  | 15.25790078 | 13.41177116 | 9.345631633 | 4.37652195  |
| 7.940205938 | 17.35170941 | 13.54362739 | 9.915108407 | 3.137845062 |
| 8.75781683  | 17.33712599 | 14.85788739 | 7.451315383 | 6.173298113 |
| 8.383738083 | 16.60387766 | 16.15452135 | 9.223661445 | 5.444934765 |
| 8.105548096 | 18.63355674 | 9.641582932 | 8.008413749 | 2.040577852 |
| 7.731592954 | 16.54201108 | 10.07377297 | 10.53107375 | 5.218722631 |
| 9.73813402  | 17.49859089 | 11.56731516 | 7.234092111 | 5.35081444  |
| 6.786634064 | 16.0106415  | 12.2808312  | 8.517090863 | 5.891861583 |
| 7.9094473   | 17.13921696 | 14.37253307 | 7.429059577 | 4.698889458 |
| 6.597292982 | 16.10066029 | 16.59398495 | 7.846767713 | 5.624938634 |
| 8.492894216 | 17.73182595 | 15.50065293 | 8.717159109 | 5.502193453 |
| 7.074740087 | 15.43091894 | 17.33479367 | 8.936917861 | 4.940937697 |
| 10.46602558 | 17.23287912 | 11.87431624 | 10.66222016 | 5.177692322 |
| 7.023935553 | 15.15585353 | 13.673773   | 8.433462784 | 6.102679464 |
| 7.655873645 | 16.67083966 | 11.1110588  | 9.957353369 | 4.458029114 |
| 8.246212283 | 16.74076977 | 15.59709484 | 8.363031823 | 7.27381852  |
| 6.396804497 | 16.9656999  | 18.0816161  | 7.346874318 | 4.781804309 |
| 8.233397742 | 17.23226111 | 15.40359627 | 8.099196947 | 5.540231301 |
| 9.052419253 | 16.56689497 | 17.53667469 | 7.555013926 | 5.214849589 |
| 7.350161517 | 17.15620843 | 15.70036145 | 9.341821741 | 5.309080806 |
| 9.062528871 | 16.30382295 | 14.17834243 | 8.871257338 | 6.86307546  |
| 9.013283924 | 17.28247846 | 18.23554554 | 6.554354444 | 6.21005168  |
| 8.32408196  | 18.06422542 | 16.29738726 | 8.692369448 | 5.715521964 |
| 7.164965875 | 17.63490733 | 10.75461051 | 9.37835432  | 3.854629171 |
| 8.139308509 | 15.75422389 | 12.77284055 | 6.567816079 | 3.924040529 |
| 10.39104304 | 17.12114052 | 15.37765593 | 7.363915367 | 5.390065529 |
| 7.45455767  | 16.08544709 | 14.16974555 | 9.655140056 | 5.033702947 |
| 9.136025356 | 17.24011477 | 15.73164047 | 7.42650285  | 4.486393097 |
| 8.174861505 | 17.14501781 | 16.61852503 | 8.76584314  | 4.292551393 |

| hsa-miR-221-3p | hsa-miR-1307-3p | hsa-miR-511-5p | hsa-miR-660-5p | hsa-miR-1248 |
|----------------|-----------------|----------------|----------------|--------------|
| 7.472265715    | 11.52168058     | 5.746249619    | 8.045543718    | 0.082451569  |
| 8.001698886    | 12.26521442     | 7.82931272     | 8.284883299    | 1.612805047  |
| 8.751199772    | 11.84664629     | 4.792808627    | 7.623521122    | 0.386766004  |
| 9.442684223    | 12.73429984     | 5.089981317    | 8.381850296    | 0.867984878  |
| 9.042996509    | 13.30377536     | 4.615288352    | 7.537327708    | 0.011736745  |
| 8.182931827    | 11.65469409     | 5.190176514    | 8.493505178    | 0.024402563  |
| 9.322071359    | 11.99825693     | 5.066215369    | 8.617206065    | 3.344681275  |
| 9.079869253    | 12.2385246      | 4.387152659    | 8.522606963    | 1.978222677  |
| 8.295396303    | 12.52821995     | 3.780093589    | 8.964173183    | 0.775864569  |
| 9.695728757    | 13.72778386     | 4.586324509    | 7.644369303    | 0            |
| 8.334662872    | 11.71913989     | 6.995619351    | 7.148588101    | 2.434296938  |
| 8.295537645    | 12.12147506     | 6.578671633    | 8.483197863    | 1.316993934  |
| 9.585059547    | 12.82530977     | 4.380186311    | 9.173018709    | 1.941998674  |
| 6.846435677    | 12.6213687      | 5.187341734    | 7.67361157     | 0.0498804    |
| 9.891582893    | 13.45806591     | 6.340538869    | 8.833346637    | 0            |
| 9.331020163    | 12.66995973     | 5.339331904    | 8.513239974    | 0.056976036  |
| 8.650155393    | 12.0557722      | 6.083116865    | 8.411638688    | 0            |
| 8.367047175    | 12.89048908     | 4.971714192    | 8.300836475    | 0            |
| 8.838247496    | 12.71597443     | 4.578612364    | 8.377508502    | 0.092185429  |
| 7.7338578      | 11.81037951     | 6.297577849    | 8.632852678    | 2.762062254  |
| 10.22614588    | 12.38647123     | 5.379792387    | 9.915798859    | 2.017964739  |
| 8.506440904    | 14.1823067      | 5.468587785    | 6.642029963    | 1.366593996  |
| 8.494864153    | 12.81080633     | 4.274430306    | 9.673981185    | 1.864238209  |
| 9.019520714    | 12.71787401     | 5.05277194     | 8.145118759    | 0.134450349  |
| 10.10637095    | 13.04413458     | 4.529406647    | 8.653580593    | 1.430758576  |
| 9.544383996    | 12.25727135     | 5.247907974    | 8.47650429     | 1.536319786  |
| 8.829878017    | 13.59062312     | 4.229197089    | 8.646629624    | 0.007622821  |
| 9.332123393    | 12.70001891     | 6.62204239     | 8.28258675     | 0.125586576  |
| 11.88662558    | 12.98561747     | 5.575767293    | 9.027004411    | 3.217519559  |
| 10.52400373    | 12.43128945     | 6.471153965    | 9.130635263    | 0.798823159  |
| 9.187795515    | 12.93721071     | 8.708342023    | 9.183682099    | 2.77865073   |
| 9.546773497    | 14.38584042     | 3.498030684    | 8.811114698    | 0.023722399  |
| 10.36849718    | 11.49039599     | 3.77695237     | 7.94430996     | 1.196049793  |
| 9.179511299    | 12.50493282     | 5.51531562     | 8.862811582    | 1.895218923  |
| 9.904334442    | 11.55739013     | 4.93024994     | 8.731173197    | 0.761412497  |
| 9.230820441    | 12.97889611     | 4.592067596    | 7.645061521    | 1.671045239  |
| 7.603540182    | 12.29850793     | 5.481783831    | 9.022539319    | 0.070090919  |
| 8.874219033    | 12.47137673     | 5.71257663     | 8.736017995    | 0.012341436  |
| 9.531026218    | 12.9289093      | 6.012893228    | 8.042756306    | 0.033103359  |
| 9.4401927      | 12.18055262     | 2.938064494    | 8.325286932    | 1.682048805  |
| 8.042344149    | 12.22762855     | 5.366448557    | 7.82467207     | 0            |
| 8.998748446    | 12.69768924     | 5.768938058    | 7.972319639    | 1.612734435  |
| 8.209415856    | 12.67513637     | 3.78956097     | 9.60883255     | 2.024575622  |
| 6.534105647    | 12.40546164     | 6.168369872    | 11.68586177    | 1.530462898  |
| 9.014095295    | 13.84917102     | 6.18474582     | 7.835182156    | 2.094331618  |
| 7.038293179    | 12.57937297     | 5.414871128    | 7.224620918    | 0.92005474   |
| 8.933989582    | 12.28128048     | 4.474064584    | 8.578088248    | 0.165577568  |
| 8.868699849    | 11.74322573     | 4.641189306    | 8.361422467    | 1.336686281  |
| 9.092801653    | 13.73106842     | 5.07338147     | 8.996665411    | 1.416601384  |
| 7.539594135    | 11.52554419     | 5.736969948    | 7.846799649    | 2.680838273  |
| 8.691352333    | 13.39965676     | 6.719824395    | 8.243864997    | 1.302337463  |
| 7.823588334    | 11.38297696     | 7.144573647    | 6.85262468     | 2.978963306  |
| 9.344959318    | 12.48488673     | 5.455676076    | 8.912433165    | 0            |
| 8.308602746    | 12.12847052     | 5.58383112     | 8.527700421    | 2.109041527  |
| 9.090496266    | 12.64910085     | 6.547666489    | 7.60043914     | 1.100492527  |
| 10.09384957    | 12.81029236     | 8.092602042    | 11.07242094    | 1.732397943  |

|             |             |             |             |             |
|-------------|-------------|-------------|-------------|-------------|
| 8.566669984 | 12.58233572 | 5.637915715 | 8.322238509 | 1.957886143 |
| 9.470132124 | 11.94694544 | 5.391299048 | 7.5720489   | 2.655040274 |
| 9.338425894 | 13.4742896  | 5.593148161 | 8.126621055 | 0.004830396 |
| 8.150681165 | 12.9242715  | 5.932396161 | 8.678313283 | 1.057823101 |
| 8.746042461 | 12.95476347 | 4.568534697 | 9.015470162 | 0           |
| 9.757867121 | 12.8624161  | 5.204557215 | 9.457886924 | 2.320936461 |
| 8.823702258 | 13.35541742 | 6.921340269 | 7.975651815 | 0.004813775 |
| 8.441329492 | 13.88322659 | 7.219875775 | 8.82254973  | 1.149070719 |
| 9.023539993 | 11.99822203 | 6.136657884 | 9.128186566 | 1.689711809 |
| 9.713022971 | 11.4642096  | 6.287591722 | 8.33760381  | 1.001260347 |
| 8.231816073 | 13.23180049 | 5.463911113 | 7.586468725 | 0.103785204 |
| 8.860106263 | 11.98333825 | 5.013887168 | 8.605461705 | 0           |
| 7.685729542 | 13.25545747 | 6.983673855 | 7.712870454 | 0.131171174 |
| 9.077816523 | 12.83364727 | 6.563913486 | 8.949676445 | 0           |
| 8.238447118 | 12.37705181 | 6.060924278 | 8.508086629 | 0.937762999 |
| 10.265771   | 14.31998622 | 5.306777476 | 9.401373912 | 0.028199435 |
| 9.003190149 | 12.93226232 | 5.093891919 | 8.445998281 | 1.139623731 |
| 8.268536394 | 11.80692714 | 5.81174363  | 9.028056235 | 0.146375202 |
| 10.38781364 | 12.46945966 | 6.737355482 | 8.5169129   | 0.828410328 |
| 7.721847575 | 11.66211782 | 3.86657061  | 8.939862381 | 0           |
| 7.7470919   | 13.07278777 | 6.400018972 | 7.33180553  | 0.024201305 |
| 7.324022684 | 11.75355953 | 4.911087252 | 9.089944608 | 0.113711797 |
| 10.61643277 | 13.22977465 | 4.838341117 | 8.969429169 | 0           |
| 8.709757104 | 13.06214425 | 5.184013865 | 8.697042763 | 1.164235136 |
| 8.493162419 | 12.53613417 | 5.211426872 | 8.295147355 | 1.455384515 |
| 9.656277465 | 13.5231318  | 5.803117045 | 9.489424778 | 0.982856303 |
| 10.63769572 | 13.46161782 | 4.535087658 | 9.416244115 | 0.764341451 |
| 9.744118626 | 13.39957386 | 5.112133828 | 7.889293965 | 1.065768559 |
| 9.911093403 | 11.62094397 | 5.153530248 | 7.494765208 | 2.538998132 |
| 10.82933836 | 13.6152407  | 3.269714898 | 9.077323778 | 0.8130762   |
| 11.40855572 | 12.84487299 | 5.967219245 | 9.935690533 | 1.342924704 |
| 10.70032147 | 12.95521178 | 4.207666119 | 9.013575797 | 0           |
| 7.533363822 | 12.54310251 | 4.586360307 | 10.20621457 | 1.784541491 |
| 9.547376085 | 11.86582625 | 6.541543811 | 8.809764677 | 2.323678345 |
| 8.878338124 | 13.28996412 | 6.641325893 | 9.635275787 | 1.65250795  |
| 9.153420726 | 12.69143655 | 7.314229079 | 10.00361658 | 0.117978252 |
| 8.509847078 | 12.41747815 | 6.598063514 | 8.069683032 | 3.645077261 |
| 8.562950034 | 13.30495733 | 7.009151463 | 9.343609834 | 1.045285239 |
| 9.777094893 | 13.24776448 | 6.290597956 | 8.806954613 | 1.938375589 |
| 10.03749679 | 12.64177161 | 5.257539165 | 7.621221268 | 0           |
| 8.73644033  | 13.20903645 | 5.617843489 | 8.382151834 | 0.864154473 |
| 8.886236748 | 12.08172671 | 4.826320327 | 8.90675341  | 0.05769558  |
| 9.064689164 | 12.14962955 | 5.858526753 | 9.742105691 | 1.552283051 |
| 8.536521391 | 12.67479051 | 4.570304857 | 7.362088667 | 0.014237314 |
| 10.59461171 | 13.09820701 | 4.951341215 | 7.757074713 | 0           |
| 8.957773993 | 12.36508104 | 3.623374707 | 6.667700187 | 3.354157605 |
| 9.711462217 | 12.51052034 | 6.191523338 | 9.156777963 | 0.989690585 |
| 6.933634668 | 11.8094407  | 4.263332707 | 7.733853978 | 0           |
| 7.902552736 | 13.64368203 | 3.949923736 | 10.01102049 | 0.980878383 |
| 9.037939786 | 11.60290568 | 4.581733343 | 9.06422117  | 0.408101307 |
| 8.708092707 | 11.87612696 | 6.107816712 | 7.182964079 | 2.368473831 |
| 9.279749842 | 13.02394712 | 8.201559158 | 8.47304749  | 1.91017218  |
| 9.355212014 | 11.81354797 | 5.732343806 | 8.653729632 | 1.857489462 |
| 8.5672609   | 12.99829157 | 3.908289962 | 7.107584605 | 1.867094991 |
| 8.974495804 | 12.90282036 | 4.908789154 | 7.201027299 | 1.17449419  |
| 8.352599592 | 13.66241167 | 6.188699967 | 9.354989788 | 0.01005484  |
| 8.869606535 | 12.26776725 | 5.298802553 | 6.872346317 | 2.416959403 |
| 8.524779859 | 12.28323028 | 5.953108259 | 7.944743494 | 1.350085429 |

|             |             |             |             |             |
|-------------|-------------|-------------|-------------|-------------|
| 8.191156466 | 12.39908925 | 5.53272264  | 9.112730045 | 1.691887991 |
| 9.816540812 | 11.77334741 | 5.718900572 | 7.623767075 | 1.036443087 |
| 9.400257587 | 11.05744275 | 4.438788963 | 8.289126865 | 1.36913309  |
| 9.471475539 | 12.05397604 | 6.948463717 | 8.864825787 | 0           |
| 8.87560968  | 13.62302792 | 6.737858244 | 9.04627508  | 1.688056654 |
| 9.351956494 | 13.09781221 | 6.312814282 | 8.852210358 | 0.066506934 |
| 9.330349478 | 11.72275401 | 5.8231513   | 8.437634391 | 0           |
| 10.21018307 | 11.86645149 | 3.506007811 | 8.683913158 | 0           |
| 9.167054353 | 12.27167509 | 6.161498373 | 9.192490779 | 1.01859978  |
| 10.53708913 | 13.58694414 | 3.838946923 | 8.916285905 | 0.03403136  |
| 8.571804722 | 13.91222238 | 5.555618794 | 7.460265026 | 1.205048832 |
| 8.49179677  | 12.89167316 | 6.045657727 | 8.34486274  | 0.027146973 |
| 8.268881767 | 12.45777766 | 3.748741274 | 8.039768691 | 0.058781147 |
| 9.944635181 | 11.68755183 | 5.179507539 | 8.350465096 | 0.006330191 |
| 7.741138287 | 12.59396868 | 6.213162696 | 8.58349982  | 0.018597025 |
| 7.488892407 | 12.61306105 | 6.607205853 | 9.020862972 | 0.051672467 |
| 9.222580732 | 13.24460151 | 4.719905977 | 8.029939247 | 1.22979895  |
| 7.391098893 | 13.36985026 | 5.281355609 | 6.649955761 | 0.030544324 |
| 8.646839748 | 13.08088528 | 4.010647868 | 6.51623518  | 0           |
| 8.65066396  | 12.1473866  | 4.867092121 | 8.633764331 | 0           |
| 9.433726366 | 12.41484393 | 6.570834461 | 8.133560764 | 1.201109796 |
| 10.35737617 | 12.36377851 | 6.286270235 | 6.930123282 | 0           |
| 7.947825531 | 11.8015521  | 5.253285405 | 8.149798657 | 1.727352049 |
| 10.32137546 | 14.20878817 | 4.860955921 | 9.150925703 | 1.128825661 |
| 8.73440274  | 13.57365421 | 3.691818174 | 8.699649714 | 0.098782395 |
| 8.502147423 | 12.22867748 | 6.015272589 | 8.471745221 | 0.013654884 |
| 9.846225792 | 12.81406985 | 6.737581372 | 6.869983686 | 0           |
| 10.94483762 | 12.40848621 | 6.132904753 | 8.987894526 | 0           |
| 7.561082747 | 12.29423114 | 4.650175993 | 8.287273107 | 0.000798644 |
| 10.18434445 | 12.83983725 | 5.040821557 | 8.396350482 | 1.755509997 |
| 7.002303187 | 12.27306942 | 6.032710659 | 8.654170904 | 0.12344489  |
| 7.951918388 | 14.06551038 | 6.690434743 | 8.226312122 | 2.261145461 |
| 9.616740529 | 12.06664296 | 4.945005369 | 9.305966685 | 2.386501868 |
| 11.04207312 | 14.12715883 | 3.869735644 | 9.234084374 | 1.342030264 |
| 9.083149963 | 12.26446217 | 5.243565298 | 8.599480624 | 0.691382455 |
| 9.38828849  | 12.56169084 | 8.023167863 | 9.710663288 | 3.538292029 |
| 9.318421497 | 12.3040543  | 5.831248268 | 6.94052186  | 3.690561938 |
| 9.02867946  | 11.68023    | 5.828484856 | 9.154449754 | 1.167442996 |
| 8.126123424 | 12.02520475 | 4.698788036 | 7.539337867 | 0.854152105 |
| 9.743355235 | 13.33406255 | 4.21091707  | 9.094740547 | 0.669956248 |
| 9.366983682 | 11.47242087 | 5.611694134 | 6.865741183 | 1.805163217 |
| 8.727853968 | 13.3308902  | 7.01709566  | 10.44228907 | 0.196260973 |
| 7.878083779 | 10.41258501 | 5.450935834 | 6.973673965 | 2.461297087 |
| 8.907724458 | 12.4834526  | 4.85535731  | 9.181144274 | 1.902565251 |
| 10.51378339 | 14.05929495 | 6.334426485 | 8.708856538 | 0           |
| 8.702256113 | 12.26067248 | 3.226296979 | 6.221031885 | 0           |
| 9.144857968 | 12.41290411 | 5.456115352 | 9.275117969 | 1.864862468 |
| 9.056183323 | 13.81958144 | 6.033141263 | 8.009417353 | 0.046821429 |
| 8.994833555 | 13.64232576 | 6.574839978 | 7.908590522 | 2.20562654  |
| 9.0273943   | 13.38720717 | 6.569140484 | 7.649056669 | 0.069086195 |
| 9.649297411 | 13.23201035 | 4.597668874 | 10.72921159 | 2.567338777 |
| 10.46577808 | 13.40647199 | 5.218167945 | 8.978854522 | 0.930570866 |
| 10.03157165 | 12.63244822 | 3.855043455 | 9.704728754 | 2.990845928 |
| 10.90419225 | 12.98969655 | 6.402063237 | 8.804890933 | 1.586121252 |
| 8.622217649 | 13.29257413 | 7.07876342  | 9.290438314 | 0.071015796 |
| 8.124871526 | 11.88851767 | 5.874269681 | 7.600997242 | 0.06828436  |
| 9.593732558 | 11.93972737 | 4.419385947 | 9.704573997 | 0.49205254  |
| 7.78997531  | 13.46733201 | 4.29342593  | 8.615285468 | 1.364922192 |

| hsa-miR-1180-3p | hsa-miR-1269a | hsa-miR-101-3p | hsa-miR-222-3p | hsa-miR-767-5p |
|-----------------|---------------|----------------|----------------|----------------|
| 5.828783413     | 1.406351954   | 16.70920381    | 5.829036762    | 1.410207086    |
| 4.625500746     | 11.60118772   | 16.97733307    | 5.532987719    | 0.007862549    |
| 6.462180513     | 10.68309316   | 15.35040576    | 6.871825366    | 0.387421793    |
| 7.694924308     | 11.21368042   | 15.96551242    | 7.334042833    | 7.334113251    |
| 6.964414787     | 12.94124017   | 15.67539947    | 7.694203064    | 1.65524223     |
| 5.715305395     | 12.1713153    | 16.90727134    | 5.806685993    | 0.038218998    |
| 6.257590245     | 10.38044777   | 16.54151558    | 6.736249349    | 0.278445698    |
| 6.814401134     | 1.045556353   | 16.0266311     | 7.590293745    | 0              |
| 7.767583133     | 2.451739271   | 16.22307058    | 5.765504587    | 3.082850358    |
| 9.529518687     | 7.370154009   | 14.68326916    | 7.788443823    | 6.403297765    |
| 4.605163315     | 9.888327132   | 15.65008855    | 6.265058508    | 0.139270064    |
| 5.891182263     | 3.827297844   | 15.22047907    | 6.859404989    | 2.002952073    |
| 4.242941293     | 11.46524719   | 16.88637824    | 6.258511811    | 0              |
| 7.903127526     | 13.08657597   | 15.03460018    | 5.469811807    | 7.682084442    |
| 6.591861441     | 15.04644816   | 17.27531624    | 7.913572517    | 0              |
| 6.051523964     | 8.713549902   | 17.14734711    | 6.218958965    | 2.977924096    |
| 5.461704113     | 12.99336769   | 16.54331791    | 6.446648639    | 9.438657445    |
| 8.80065681      | 1.332794903   | 15.02370367    | 6.763160699    | 4.297803792    |
| 6.941405223     | 5.491827997   | 14.56700088    | 7.614477683    | 0.158075651    |
| 5.069843615     | 6.96197108    | 16.6713597     | 5.225823067    | 1.540569819    |
| 6.468731167     | 6.099564859   | 16.81891514    | 8.157162344    | 2.278003406    |
| 5.743542046     | 2.518863502   | 14.31503744    | 7.698344737    | 2.070309088    |
| 6.439066084     | 12.79739855   | 16.14416355    | 5.764670862    | 0.888251703    |
| 5.935339882     | 3.484022326   | 16.88776191    | 7.499459838    | 0.24475895     |
| 6.384254826     | 3.369257205   | 16.04424005    | 6.978336719    | 1.417942876    |
| 7.733057516     | 4.132822733   | 15.80619048    | 6.715101271    | 0.459007838    |
| 8.819728466     | 9.363233306   | 14.76743935    | 6.992114358    | 0.011684781    |
| 6.350334208     | 4.044284926   | 17.30406737    | 6.051444082    | 0.225722865    |
| 5.876911039     | 7.008571889   | 16.60986601    | 8.909757594    | 2.242679554    |
| 6.457465942     | 12.3268742    | 16.18131119    | 8.19402696     | 0              |
| 7.198844992     | 9.16056558    | 16.22399558    | 7.036719956    | 5.390115261    |
| 8.647926518     | 13.18539135   | 15.86049768    | 7.165489568    | 0.037121107    |
| 6.288416912     | 0.069509821   | 16.26051317    | 8.243450334    | 0.069061203    |
| 5.596396387     | 8.400103388   | 16.06055532    | 7.15663112     | 1.183061604    |
| 6.294806977     | 10.16588842   | 16.37946651    | 7.410570357    | 1.277827427    |
| 7.60347721      | 11.41010809   | 15.37760276    | 7.731756425    | 7.770736827    |
| 4.607479202     | 12.0929671    | 19.39174447    | 5.483222696    | 0.116610177    |
| 4.681576353     | 8.680626923   | 14.82231352    | 7.375146774    | 8.46109033     |
| 5.684244796     | 12.42963197   | 15.69357313    | 7.15527428     | 0.052434778    |
| 6.27344248      | 11.49888011   | 14.97738083    | 7.803238955    | 0.028213029    |
| 5.939847677     | 12.81839168   | 17.94821973    | 6.053521863    | 4.753495335    |
| 5.39850944      | 13.51173284   | 15.5897555     | 7.533341523    | 8.963377609    |
| 6.240622287     | 2.09800475    | 16.43074979    | 6.210456097    | 9.157043519    |
| 6.532711377     | 0.216457621   | 17.13044271    | 4.868669536    | 0.214632       |
| 6.253581936     | 11.92463565   | 13.86729767    | 7.051239983    | 9.276166339    |
| 6.181051508     | 8.958480339   | 16.33178073    | 5.61458652     | 3.040319711    |
| 5.266712891     | 13.69613293   | 17.02419631    | 5.834834204    | 0.315555934    |
| 7.441250523     | 3.326862525   | 17.01654347    | 6.719541081    | 0.125467946    |
| 6.555397643     | 13.04817125   | 16.10123659    | 6.866554693    | 8.43697913     |
| 4.114305085     | 0.249072337   | 17.59117723    | 5.50598404     | 0.246861448    |
| 7.14264173      | 9.012601868   | 16.00607737    | 6.81678749     | 1.983172856    |
| 5.864436296     | 5.207667416   | 16.69014633    | 6.019490078    | 0              |
| 5.543444156     | 2.092015895   | 16.10535831    | 6.70216946     | 0.558125315    |
| 4.460274346     | 2.666066072   | 15.47469192    | 6.514114074    | 1.52829183     |
| 6.967928753     | 13.55561219   | 17.35713153    | 6.817381936    | 1.107304499    |
| 5.557951119     | 2.478362625   | 17.64534547    | 7.927168957    | 0              |

|             |             |             |             |             |
|-------------|-------------|-------------|-------------|-------------|
| 5.457546051 | 4.444224255 | 16.51133347 | 5.722603664 | 2.019240788 |
| 7.08828927  | 5.535254118 | 16.22224066 | 7.773544341 | 0.64126731  |
| 8.574353382 | 10.12272676 | 15.42027579 | 7.732561257 | 0.007378163 |
| 6.422021739 | 14.18690262 | 17.01946582 | 5.772090257 | 10.06214134 |
| 6.933303559 | 11.72309149 | 15.71281823 | 6.725983767 | 0           |
| 7.816076876 | 13.40676758 | 15.73608281 | 7.458582268 | 10.84741578 |
| 7.93373908  | 6.342535912 | 15.65154707 | 6.682678067 | 2.031501708 |
| 6.78717428  | 9.755171128 | 14.51768487 | 6.424019934 | 7.007806416 |
| 5.154397076 | 3.673017871 | 16.02344923 | 6.981890622 | 10.16937449 |
| 4.394457591 | 8.869494425 | 15.70504122 | 7.743675112 | 1.001328749 |
| 7.133522198 | 1.514350616 | 17.40245849 | 5.899336371 | 0.180863853 |
| 6.251254713 | 2.447840392 | 15.23785534 | 7.595930062 | 0           |
| 5.116579728 | 1.655363559 | 14.69763307 | 5.865351748 | 1.66213393  |
| 6.69942668  | 9.102541719 | 16.65593667 | 6.614141172 | 1.417560463 |
| 6.230448886 | 11.61654682 | 15.61835173 | 6.429588442 | 8.741660114 |
| 9.439984289 | 6.746156194 | 16.25911445 | 8.267708856 | 0.044383228 |
| 5.190857579 | 10.54800296 | 16.88048281 | 7.691945884 | 2.528749534 |
| 6.977603183 | 11.61172366 | 14.88685302 | 6.624059878 | 2.453513247 |
| 5.624776673 | 3.516879313 | 15.75587621 | 8.721469826 | 7.238384101 |
| 6.060357004 | 11.01852919 | 17.91441309 | 5.663444171 | 8.531817599 |
| 8.435363279 | 3.990140822 | 14.44033238 | 6.121671056 | 8.352141219 |
| 7.035027725 | 9.719954786 | 16.2361836  | 5.535396078 | 0.200951851 |
| 7.401761606 | 2.634154611 | 16.82639704 | 7.95166782  | 0           |
| 7.790107478 | 12.73215624 | 16.34414064 | 6.656591135 | 1.799241229 |
| 6.318367965 | 2.647590351 | 16.80260013 | 6.349389945 | 1.512936457 |
| 6.912485183 | 3.431414578 | 16.58825448 | 6.764385323 | 0.981966522 |
| 7.775272583 | 10.13582015 | 16.46186975 | 7.988147808 | 3.500830761 |
| 7.862429175 | 3.915890415 | 15.41439832 | 7.436163499 | 4.75545548  |
| 5.799285492 | 4.209360275 | 15.21170341 | 8.061014261 | 0           |
| 7.67960046  | 2.864896391 | 16.3418186  | 8.423827392 | 0           |
| 5.969064658 | 9.225151121 | 15.87462785 | 9.531546612 | 0.128120671 |
| 6.166640104 | 4.442749679 | 16.96159012 | 8.807846809 | 1.526095329 |
| 6.006464048 | 12.8782508  | 16.50959711 | 6.062599266 | 2.671351722 |
| 7.743867828 | 1.586724378 | 16.07492424 | 7.35995281  | 0.000449003 |
| 5.783719735 | 9.745296804 | 16.36040429 | 6.902010778 | 2.473965066 |
| 5.320402975 | 9.978330268 | 15.22457096 | 7.944214258 | 7.285583374 |
| 6.855966345 | 8.124246273 | 16.03290849 | 6.000132289 | 4.438996223 |
| 6.207695867 | 13.92036537 | 17.34193287 | 5.833108189 | 10.24262626 |
| 9.197093438 | 11.51710202 | 15.56841418 | 7.556529075 | 4.914532435 |
| 6.863627471 | 1.940226326 | 16.04079594 | 7.355030329 | 0           |
| 6.855680195 | 3.234714705 | 16.35350362 | 6.512737295 | 0           |
| 5.762829761 | 11.92498601 | 15.90002876 | 6.920387581 | 8.977520283 |
| 5.652046075 | 13.33106819 | 17.24581318 | 6.443164867 | 0           |
| 5.241621269 | 12.352195   | 16.15912662 | 6.85530582  | 6.539914092 |
| 8.22534276  | 13.44787734 | 14.69340664 | 8.864433468 | 2.924744419 |
| 6.28773178  | 1.766046377 | 13.97795112 | 8.054305632 | 0.828209185 |
| 6.424939039 | 8.723318543 | 15.39415804 | 7.57437254  | 3.442522746 |
| 7.480715455 | 9.595054559 | 17.54793259 | 5.079722686 | 6.88138767  |
| 7.186914285 | 14.08214117 | 17.28329815 | 5.985258607 | 10.10998288 |
| 5.29208196  | 3.447149618 | 15.18618585 | 6.508241261 | 6.683856052 |
| 8.340153525 | 4.817383538 | 16.1079892  | 7.515217769 | 0.012176651 |
| 7.034808052 | 0.991889182 | 16.14525908 | 7.268989582 | 0           |
| 5.823392714 | 1.841659627 | 16.05251224 | 7.047620956 | 0           |
| 6.581773413 | 12.13875407 | 15.13231285 | 6.305606972 | 9.904153338 |
| 5.771414744 | 12.83395522 | 16.56235049 | 7.004685878 | 7.340788247 |
| 6.999577786 | 2.390390107 | 15.42829881 | 6.767195981 | 1.049250617 |
| 5.451297162 | 4.712510817 | 14.37239763 | 7.506046921 | 0.025400128 |
| 7.081412102 | 2.998687878 | 15.66415544 | 6.542065971 | 0           |



|             |             |             |             |             |
|-------------|-------------|-------------|-------------|-------------|
| 4.826985508 | 9.07190982  | 16.20493732 | 6.404603982 | 0.301076303 |
| 5.99856121  | 4.358630936 | 15.76119458 | 7.439350518 | 0.331605456 |
| 5.999176679 | 10.60599622 | 17.46709517 | 7.222325054 | 8.983217717 |
| 7.202755515 | 2.336785393 | 16.34438044 | 6.844457917 | 0           |
| 6.362608942 | 13.41701352 | 16.55964149 | 6.753452968 | 2.125595992 |
| 7.98600149  | 13.01683557 | 16.00587511 | 6.756804634 | 10.33290435 |
| 6.710833438 | 10.77863595 | 15.63921309 | 7.568610058 | 7.817247204 |
| 7.549153231 | 6.422501355 | 16.73270478 | 8.152657157 | 0           |
| 5.458372982 | 9.320352574 | 15.60561528 | 7.39004188  | 4.616633466 |
| 8.544076605 | 13.10067019 | 15.41179897 | 8.492202315 | 1.167425538 |
| 7.105515236 | 12.02137736 | 14.36530186 | 7.373541994 | 8.959101776 |
| 5.797900096 | 5.941104425 | 17.04546029 | 6.279924148 | 9.302680673 |
| 7.096473782 | 4.014910135 | 15.35697641 | 6.38209772  | 0.096317866 |
| 5.635548556 | 12.21030573 | 17.52710189 | 7.792601861 | 8.829243687 |
| 5.70149886  | 13.10739553 | 16.28088881 | 5.606238263 | 1.091226568 |
| 6.443275021 | 12.31802263 | 16.63396516 | 6.041803038 | 1.89233405  |
| 8.545738138 | 10.19454066 | 15.32075765 | 6.828368972 | 9.624189871 |
| 7.306873115 | 9.52534814  | 16.78097153 | 5.560252865 | 6.632605693 |
| 7.544899104 | 3.293110572 | 15.5147634  | 6.71249127  | 0           |
| 6.91558626  | 12.01226765 | 17.22933489 | 5.564928571 | 0           |
| 5.926712578 | 14.64321826 | 16.41027263 | 7.164507735 | 1.217751527 |
| 5.707727951 | 10.73997349 | 15.5172062  | 8.424247133 | 9.834397499 |
| 5.765138636 | 10.06071943 | 16.79352154 | 5.702338212 | 0.042174782 |
| 8.21101407  | 3.528698429 | 15.27844231 | 8.31001871  | 2.182246956 |
| 6.162887086 | 0.172296922 | 15.37277234 | 6.493787275 | 1.493668702 |
| 4.807468389 | 5.107431723 | 15.69975881 | 6.877436765 | 4.353813614 |
| 6.133487788 | 2.913650389 | 16.02841188 | 7.645552985 | 0           |
| 6.411034471 | 12.91992782 | 15.43888727 | 8.762341537 | 1.923511683 |
| 6.800882717 | 10.14222474 | 16.564148   | 6.050838135 | 8.664702496 |
| 5.242034516 | 2.617729566 | 18.57323048 | 7.945384864 | 0.33868226  |
| 6.8664099   | 1.615284791 | 15.83685053 | 5.423511211 | 8.749615487 |
| 6.740113191 | 13.09461292 | 15.41567154 | 6.125802907 | 8.493571694 |
| 6.802878983 | 3.404291198 | 17.11650787 | 7.596688569 | 0.017027659 |
| 9.040342711 | 11.26353917 | 17.75491183 | 8.978165993 | 0.127739505 |
| 3.972435715 | 11.75645367 | 18.2171716  | 6.579736964 | 8.075753839 |
| 7.352569099 | 12.26425238 | 15.24773606 | 7.726853474 | 6.253958119 |
| 7.118175471 | 4.470604311 | 16.47651168 | 7.491287776 | 0.063531815 |
| 5.859522314 | 1.807592069 | 16.54379749 | 6.993608116 | 0           |
| 5.849218019 | 6.007187679 | 15.45860357 | 6.397918173 | 0           |
| 6.089336657 | 3.018944987 | 15.90956711 | 7.193481227 | 0           |
| 5.994476331 | 12.45828499 | 16.8644837  | 7.3259661   | 4.057910954 |
| 6.10103761  | 3.59632602  | 16.31095025 | 6.87057093  | 2.015584739 |
| 5.879667923 | 12.27356838 | 16.50295517 | 6.434547083 | 7.419087379 |
| 5.422469472 | 9.635076962 | 16.14192512 | 6.702590778 | 1.305480867 |
| 6.757562424 | 6.582877112 | 16.32882035 | 8.396045849 | 1.529569327 |
| 7.018467809 | 4.987690297 | 16.00961263 | 6.823930604 | 0.611023822 |
| 6.482573053 | 8.777818438 | 15.56020645 | 6.893329534 | 1.266996024 |
| 6.839271158 | 11.02669491 | 13.36647992 | 7.659331017 | 2.909368166 |
| 7.430622272 | 12.3483385  | 16.68226205 | 7.128491589 | 9.924795065 |
| 5.845828571 | 3.662036854 | 14.15175966 | 8.337221176 | 0.114782597 |
| 5.989049007 | 1.752202639 | 15.43048883 | 7.842970812 | 1.358436388 |
| 6.623551526 | 2.958638978 | 16.14332447 | 7.558341344 | 0.477850402 |
| 5.952298483 | 8.412755598 | 16.85518273 | 7.236989351 | 0.123820813 |
| 6.535566942 | 3.919856034 | 16.56586408 | 8.550533605 | 1.675330714 |
| 7.04972013  | 2.451496234 | 14.0028257  | 7.772284476 | 1.352279276 |
| 4.083725609 | 11.42887849 | 17.56943917 | 5.803498584 | 0.113327589 |
| 5.905549493 | 12.66154373 | 15.23580404 | 7.410523141 | 1.263482199 |
| 7.109028312 | 2.516456385 | 16.11426392 | 5.564575071 | 0.137583146 |

| hsa-miR-33b-5p | hsa-miR-105-5p | hsa-miR-1301-3p | hsa-miR-877-5p | hsa-miR-452-3p |
|----------------|----------------|-----------------|----------------|----------------|
| 3.149540212    | 1.409164955    | 4.510503519     | 3.138645575    | 3.381568406    |
| 4.625349738    | 0.007877932    | 4.898668011     | 2.033870064    | 4.898685109    |
| 2.212578185    | 0              | 6.87605166      | 3.221447534    | 4.606325775    |
| 6.106964435    | 8.112475714    | 5.916217339     | 3.243164993    | 6.648207265    |
| 4.483531205    | 1.057376269    | 7.148927442     | 3.787818378    | 3.67401178     |
| 3.884413257    | 0.038299214    | 4.509688431     | 1.122762032    | 1.120679995    |
| 4.505927006    | 0.279347892    | 4.639209921     | 1.771057262    | 3.305872657    |
| 4.129498755    | 0              | 4.883895381     | 3.066993741    | 6.146060647    |
| 6.26966298     | 3.423900497    | 3.780123317     | 1.678028601    | 4.688789698    |
| 3.148461049    | 7.438002519    | 6.985119817     | 4.762746694    | 2.892513073    |
| 4.297982488    | 0.139628752    | 3.912241894     | 1.418256286    | 4.053337646    |
| 3.969531197    | 2.002071711    | 5.659683953     | 2.449893618    | 5.436341213    |
| 4.313377537    | 0              | 3.50807824      | 2.252866722    | 7.037672248    |
| 4.06969343     | 8.502124459    | 5.629639117     | 3.153781449    | 6.632391279    |
| 7.340699186    | 0              | 4.806980771     | 2.76113578     | 6.842957211    |
| 4.74856258     | 2.977392549    | 4.596403236     | 1.288134819    | 0.092237533    |
| 6.367498698    | 10.32353191    | 4.914798547     | 3.831989746    | 5.318895319    |
| 4.179201479    | 5.62387731     | 6.994319988     | 4.417018852    | 2.845516484    |
| 5.200853387    | 0.158496872    | 5.933765527     | 4.452147564    | 5.814964161    |
| 2.753241427    | 0.964022812    | 4.263515806     | 2.532409432    | 4.029434065    |
| 4.635730407    | 3.038902202    | 2.288962451     | 4.352364321    | 6.457919641    |
| 2.526125713    | 2.865588409    | 6.82529487      | 3.891325228    | 0.136857177    |
| 5.134671003    | 0.88848316     | 4.064026691     | 2.638776102    | 4.941881772    |
| 4.958768502    | 0.245512375    | 6.472063771     | 1.690499691    | 6.890053014    |
| 2.958234263    | 1.418256443    | 5.771117996     | 2.793125425    | 5.90007335     |
| 4.653662137    | 0.459839347    | 6.15825199      | 3.633753597    | 2.366564516    |
| 3.758689243    | 0.011707851    | 6.038107777     | 4.812965901    | 7.409879166    |
| 4.203759198    | 0.226397112    | 4.048277756     | 2.329320273    | 3.668861888    |
| 5.874589043    | 1.184370171    | 5.575537132     | 2.243194137    | 7.223531211    |
| 7.484904211    | 0              | 5.706024708     | 3.126278548    | 6.471211694    |
| 3.77461937     | 5.218448675    | 5.333051644     | 2.093007023    | 6.161851259    |
| 4.268614956    | 0.037198828    | 7.295695385     | 3.759024048    | 5.914239888    |
| 1.843754989    | 1.211613988    | 5.7911336       | 3.303583796    | 5.917229957    |
| 5.496024085    | 1.555289921    | 5.90247561      | 3.627843786    | 5.636849987    |
| 7.475936962    | 0.755513523    | 4.743962328     | 2.61329008     | 6.413345958    |
| 6.597262542    | 8.743294492    | 5.519978931     | 3.813173218    | 6.095383798    |
| 3.826921601    | 0.116897997    | 3.497092885     | 2.447942402    | 8.064967207    |
| 2.406896809    | 8.041723821    | 6.098048253     | 2.080933913    | 6.713095295    |
| 1.784336724    | 0.052548334    | 5.649367322     | 1.784681531    | 4.574977724    |
| 3.304058462    | 0.028270919    | 5.352021406     | 2.118737447    | 4.896621892    |
| 8.532100219    | 5.633192958    | 5.211720457     | 2.367694676    | 6.727093027    |
| 4.740807482    | 9.365774647    | 4.499708485     | 3.207578859    | 5.822387749    |
| 3.413414636    | 8.997528247    | 4.087090545     | 2.105066669    | 5.402891984    |
| 2.30435884     | 0.215261737    | 6.129604885     | 1.615991605    | 2.766900092    |
| 3.513722828    | 9.993798406    | 5.611799498     | 3.496068369    | 7.119066534    |
| 5.253355122    | 3.452191718    | 5.319937157     | 2.682187458    | 5.070306856    |
| 1.857232659    | 0.316634904    | 4.473403083     | 3.028551609    | 5.994941379    |
| 5.918738228    | 1.371089353    | 5.562012139     | 2.816624332    | 6.11977849     |
| 4.882146094    | 8.592184316    | 5.305514737     | 2.941614803    | 3.568062598    |
| 2.394774489    | 2.386222902    | 4.11395964      | 0.219940664    | 2.861650295    |
| 6.339209174    | 1.331476285    | 5.204067251     | 1.339698146    | 1.985486377    |
| 5.693065504    | 0              | 4.851492474     | 1.267258224    | 3.488189478    |
| 2.420727125    | 0.558865515    | 6.110149973     | 2.930479151    | 4.351733745    |
| 3.535060464    | 0.184816279    | 5.475152618     | 2.665928085    | 4.938324107    |
| 4.415802616    | 2.470604944    | 4.416183157     | 1.717260732    | 4.813616284    |
| 3.810012506    | 0              | 5.12155629      | 2.008611438    | 4.840382839    |

|             |             |             |             |             |
|-------------|-------------|-------------|-------------|-------------|
| 4.62687039  | 0.122536974 | 5.355524278 | 3.505672587 | 3.31891211  |
| 5.078722883 | 0           | 5.455438208 | 2.725244431 | 2.720790925 |
| 7.038612873 | 0.007392581 | 6.921433589 | 3.49533729  | 2.84242866  |
| 3.262853484 | 10.68767214 | 5.268751634 | 2.407580108 | 6.347652132 |
| 2.38902463  | 0           | 5.285001757 | 3.634218204 | 5.136120652 |
| 2.996167384 | 11.06838781 | 3.753566969 | 3.217845387 | 3.225827531 |
| 3.035509146 | 3.49585556  | 5.766374138 | 4.680600999 | 5.497819003 |
| 2.228232184 | 7.453229657 | 6.026466739 | 4.175551961 | 5.429599068 |
| 1.656951546 | 10.5896777  | 5.757843941 | 3.679070294 | 3.395990344 |
| 3.323980366 | 2.001778384 | 4.172050975 | 2.80931285  | 8.552944719 |
| 6.318929419 | 0.18136539  | 4.658385573 | 1.529499952 | 4.926446609 |
| 4.095104486 | 0           | 6.217492992 | 3.438388469 | 0.905971916 |
| 0.231359391 | 0.238384404 | 5.65185479  | 3.67815331  | 3.705751088 |
| 5.295768552 | 1.417874716 | 5.231099819 | 3.591879041 | 5.878807461 |
| 5.592254355 | 9.603993433 | 4.478085308 | 3.804389141 | 4.892266868 |
| 6.000946089 | 0.044477667 | 6.613524151 | 5.210757414 | 5.679582121 |
| 5.880581923 | 2.797604087 | 4.555362796 | 2.528044867 | 3.3932891   |
| 2.460655168 | 3.566147089 | 5.043473679 | 2.450515105 | 6.346901528 |
| 4.286108431 | 7.976227593 | 4.906613579 | 2.724524583 | 6.563538648 |
| 2.057100487 | 8.525229678 | 4.086960409 | 1.748199097 | 4.086911941 |
| 5.187880335 | 10.68452128 | 7.714529415 | 4.428112304 | 7.429486431 |
| 3.075127749 | 0.201528326 | 5.639937441 | 2.715909489 | 5.532597202 |
| 3.342452195 | 0           | 6.416607448 | 3.035897881 | 4.502729324 |
| 8.882743683 | 1.798803686 | 4.271793448 | 1.801656897 | 5.23146488  |
| 4.830861338 | 0.178848853 | 4.191824408 | 0.160739536 | 1.516878302 |
| 3.556630472 | 1.562834242 | 5.327927216 | 3.431778555 | 0.981844582 |
| 4.827924344 | 3.759792223 | 6.702606039 | 2.93217288  | 6.017113714 |
| 5.756241673 | 5.156794416 | 5.112066255 | 3.69050895  | 2.910269811 |
| 4.322275461 | 0           | 5.431821643 | 3.817816568 | 1.53733881  |
| 4.373240546 | 0.807472469 | 6.265277715 | 3.274423677 | 0.805878439 |
| 4.466278202 | 1.378332328 | 4.734571954 | 4.122343724 | 4.734830117 |
| 2.612951344 | 1.820056537 | 7.565128838 | 4.271231214 | 5.344198704 |
| 0.345402286 | 0.357860141 | 4.042947906 | 1.947773228 | 5.943137037 |
| 6.556961081 | 1.001442708 | 5.494220632 | 3.002157909 | 5.702812979 |
| 3.590070732 | 0.279749561 | 5.661665048 | 2.933817018 | 6.759467587 |
| 3.102575107 | 7.124537209 | 5.616378235 | 4.125193389 | 4.544795695 |
| 6.780371466 | 4.188873605 | 5.185142693 | 2.81163834  | 5.002666116 |
| 5.247171638 | 10.47461923 | 3.072025131 | 1.049204157 | 6.05538225  |
| 4.302562268 | 5.673625483 | 6.098755757 | 4.15133325  | 6.721001128 |
| 3.26986393  | 1.699965465 | 5.094731483 | 3.092038223 | 5.189929966 |
| 4.717333525 | 0.859330983 | 4.849534127 | 1.406945885 | 4.716695039 |
| 1.289016497 | 8.689835734 | 4.126216231 | 2.370548999 | 2.372455045 |
| 2.542103665 | 0           | 4.537438468 | 1.548489785 | 7.199316381 |
| 3.275387199 | 7.480441339 | 4.969625926 | 2.908806614 | 4.811838159 |
| 6.068696502 | 2.925261278 | 6.591717895 | 3.051166361 | 6.177172903 |
| 3.884029883 | 0.828553747 | 6.179668738 | 3.889867459 | 6.573651602 |
| 2.306519724 | 3.30516686  | 5.191684279 | 5.304758601 | 4.626238515 |
| 4.605296643 | 7.065640366 | 4.207430982 | 1.94861978  | 4.72887423  |
| 5.225519485 | 10.29710747 | 5.90226788  | 3.369173419 | 6.45922916  |
| 3.120514711 | 6.888267499 | 4.867360614 | 4.708676263 | 5.416697276 |
| 7.150744113 | 0.01220072  | 6.367229242 | 3.228035855 | 3.645391108 |
| 2.375532926 | 0           | 5.249192065 | 3.484982264 | 5.289191407 |
| 2.410412119 | 1.440044085 | 5.124815693 | 2.411501709 | 2.410739187 |
| 2.830741949 | 10.75279275 | 4.572634712 | 4.630154976 | 2.164543179 |
| 5.951928922 | 8.206652021 | 4.845426857 | 1.809020663 | 5.426311839 |
| 1.645788802 | 1.049140575 | 7.724278105 | 3.882558079 | 6.209453472 |
| 5.034834324 | 1.080167156 | 5.801836093 | 3.57994046  | 4.448885519 |
| 5.433306719 | 0           | 4.561760973 | 3.577488643 | 3.473292642 |

|             |             |             |             |             |
|-------------|-------------|-------------|-------------|-------------|
| 0.292322279 | 0.302084685 | 5.131553424 | 2.526631534 | 3.654282711 |
| 2.0872594   | 0.709362416 | 4.829792934 | 3.082152787 | 6.666696319 |
| 5.964862633 | 9.058226074 | 4.491019819 | 2.050797817 | 5.744657564 |
| 4.815489791 | 0.442247678 | 6.208836519 | 3.896864693 | 5.80423153  |
| 4.608662352 | 2.125376064 | 5.544000523 | 1.09703509  | 2.721045559 |
| 5.141268249 | 10.65406083 | 5.963232518 | 3.264363313 | 6.61461289  |
| 4.923369399 | 8.231440496 | 5.441958086 | 4.005239555 | 6.780122696 |
| 2.858754206 | 0.435765965 | 5.676992178 | 2.1786302   | 1.660887107 |
| 3.731221544 | 5.241479209 | 5.424327884 | 2.349533892 | 3.937952436 |
| 3.955165243 | 0.054087239 | 8.249269271 | 4.249992555 | 8.086705876 |
| 1.225015102 | 9.285994049 | 5.87041754  | 4.651337983 | 5.389863714 |
| 5.380527781 | 9.830246083 | 4.794525786 | 2.176728875 | 5.255566796 |
| 1.294531027 | 0.096546367 | 6.256090358 | 4.593896625 | 6.203858068 |
| 2.041722156 | 9.868230891 | 4.509054613 | 5.177719337 | 6.050618318 |
| 4.142260306 | 2.120822034 | 3.725307707 | 2.448571434 | 5.761316284 |
| 6.624101323 | 0.08406556  | 5.092670095 | 3.5350427   | 5.394087434 |
| 4.643827629 | 10.05705629 | 5.636904399 | 2.522512285 | 5.656466101 |
| 2.199415306 | 9.099713091 | 6.897518005 | 2.528431063 | 3.930023478 |
| 4.97185001  | 0           | 6.670722513 | 2.421744794 | 2.238062798 |
| 6.151385268 | 1.562008138 | 5.024908976 | 3.062610422 | 2.310389052 |
| 3.3174679   | 1.217231765 | 4.795117941 | 2.285307651 | 2.892303473 |
| 4.122835527 | 11.4924729  | 6.395848156 | 3.726574157 | 7.362036607 |
| 4.598248336 | 0.042264085 | 3.659644189 | 0.038898472 | 2.505046777 |
| 5.075004883 | 0.044314878 | 6.775151425 | 3.790350904 | 8.054112828 |
| 0.166874307 | 0.171412615 | 5.311748612 | 3.242832105 | 5.185267456 |
| 2.415874916 | 3.911626019 | 4.965114546 | 2.90470057  | 3.688409588 |
| 5.332148413 | 0           | 6.314313776 | 4.369042982 | 1.922804868 |
| 3.566831816 | 2.857854634 | 5.887869248 | 2.741333447 | 7.590970215 |
| 4.913218939 | 8.954866889 | 4.591272176 | 2.005269315 | 5.621112974 |
| 6.77142135  | 0.339878277 | 4.378379072 | 3.715916132 | 0.333824264 |
| 4.460254601 | 9.297946771 | 3.419317695 | 3.120328928 | 6.714392398 |
| 6.4067312   | 9.526686902 | 5.130482284 | 5.232190609 | 1.278921121 |
| 5.610906489 | 0.017061705 | 5.041299934 | 2.397604547 | 7.154469956 |
| 4.137481913 | 0.12806152  | 4.886935368 | 2.485557585 | 3.107528601 |
| 4.899437789 | 8.728994401 | 4.797035198 | 2.494159437 | 5.389689402 |
| 4.423156516 | 6.274202524 | 5.312469655 | 3.094299988 | 4.423411108 |
| 7.877593698 | 0.06367272  | 5.212327281 | 2.257343143 | 6.752114796 |
| 6.203357893 | 0           | 4.466238911 | 2.254653608 | 7.160742723 |
| 4.270932705 | 0           | 5.718971141 | 3.755991957 | 5.785818822 |
| 1.818400825 | 0           | 6.781614841 | 1.817765812 | 5.480104019 |
| 6.28381358  | 4.818733337 | 4.901225071 | 2.922541473 | 5.484265039 |
| 2.028498919 | 0.393414545 | 6.035190099 | 2.741648972 | 3.607387312 |
| 6.617295394 | 7.973370252 | 4.362603634 | 2.182239444 | 6.120856408 |
| 6.808504269 | 1.950922539 | 4.547095344 | 3.232739983 | 6.084714661 |
| 5.808241191 | 2.931663875 | 6.867484207 | 2.51932221  | 4.626805531 |
| 2.359484355 | 0           | 5.512714645 | 2.523862351 | 4.715966781 |
| 5.732683259 | 0.088196913 | 5.734482079 | 3.705383139 | 5.110175017 |
| 4.155905994 | 1.863075757 | 7.08986661  | 3.795068443 | 5.000373776 |
| 4.997452724 | 10.47106935 | 5.92568529  | 2.796392192 | 4.605977634 |
| 2.785797716 | 1.341691444 | 5.730782294 | 3.65217809  | 4.089354305 |
| 1.356209523 | 0.818654007 | 5.95309083  | 3.704226493 | 6.650968017 |
| 4.214275056 | 0.47866707  | 6.689984943 | 4.413246945 | 6.305075294 |
| 4.941105125 | 0.124130653 | 2.476119242 | 2.810933024 | 7.56170987  |
| 5.547151495 | 1.673495009 | 4.760456749 | 3.183259967 | 5.425635353 |
| 4.219219601 | 2.005670044 | 6.76726424  | 3.294004997 | 2.456846996 |
| 4.900401197 | 0.113605548 | 4.902125851 | 3.473420013 | 4.756470093 |
| 4.386889755 | 0.490481258 | 4.996934489 | 4.57017486  | 6.486222647 |
| 3.573922344 | 1.403993508 | 4.770312392 | 2.070956135 | 5.932590488 |

| hsa-miR-144-3p | hsa-miR-34a-5p | hsa-miR-188-5p | hsa-miR-542-5p | hsa-miR-195-5p |
|----------------|----------------|----------------|----------------|----------------|
| 3.581363022    | 10.43052092    | 3.907247006    | 3.89151578     | 8.284724678    |
| 8.731466644    | 9.832949723    | 4.209627547    | 2.033791384    | 5.796128125    |
| 4.391862774    | 9.026444806    | 3.453370046    | 3.411373435    | 6.986317042    |
| 4.525001477    | 10.56150357    | 4.233204395    | 3.589295755    | 6.105236001    |
| 4.55105637     | 8.958828009    | 3.547419663    | 2.401942498    | 7.223451705    |
| 4.186226595    | 10.31230793    | 2.488849586    | 2.979116701    | 7.542361096    |
| 5.395370227    | 12.26964689    | 4.017389358    | 2.927052831    | 7.865106928    |
| 5.435268779    | 9.333703825    | 4.432614762    | 3.256727955    | 7.84530427     |
| 3.612615052    | 10.08672759    | 4.069157551    | 2.451376113    | 5.503431308    |
| 6.010542053    | 8.261371354    | 3.027066927    | 3.032805566    | 5.394244922    |
| 3.912397634    | 10.91422942    | 2.078958325    | 2.521537174    | 7.444819655    |
| 3.674026482    | 10.68275434    | 3.495854313    | 3.058333734    | 6.581003937    |
| 5.007246761    | 12.45387512    | 4.169843265    | 4.011392028    | 6.88422        |
| 3.159897795    | 9.85305624     | 2.930389358    | 2.924571083    | 7.46414918     |
| 4.197579949    | 12.26779702    | 4.409348959    | 1.546073761    | 7.242488421    |
| 5.719972294    | 10.9103702     | 4.882328941    | 3.395713356    | 6.898648375    |
| 4.979560392    | 11.90640497    | 4.253437452    | 3.326743504    | 6.492051555    |
| 1.32995207     | 11.15169563    | 3.749168935    | 0.791409582    | 5.233072182    |
| 2.134126748    | 9.73843383     | 4.913806769    | 2.581804548    | 6.473464744    |
| 7.270718731    | 9.933632692    | 2.94518393     | 4.528255622    | 7.967429342    |
| 5.49207436     | 11.61031003    | 2.293562765    | 2.998000682    | 7.340206588    |
| 0.13718452     | 11.32908742    | 1.415057677    | 2.071743077    | 4.049618722    |
| 4.338235223    | 10.78677096    | 5.17205079     | 1.846950167    | 5.741264507    |
| 5.618808125    | 10.28629646    | 4.09556027     | 3.691921225    | 6.445626266    |
| 5.231406451    | 10.25940039    | 3.244752046    | 2.604068363    | 6.127359072    |
| 2.912894863    | 10.91859244    | 4.740435804    | 4.37434231     | 6.972057402    |
| 4.229207285    | 9.547573648    | 5.674442992    | 1.631223038    | 4.703853186    |
| 4.478219385    | 12.16337463    | 3.861660767    | 3.405516744    | 5.725909268    |
| 3.270844926    | 12.08532917    | 4.18668664     | 2.573708646    | 4.371888132    |
| 4.107731106    | 10.53599425    | 5.105572103    | 3.661721899    | 7.183164806    |
| 5.276841748    | 10.39084193    | 4.865959396    | 3.580612127    | 6.751947536    |
| 3.344479877    | 8.398489823    | 3.635554479    | 2.74935626     | 4.181094716    |
| 6.140440856    | 8.279809317    | 3.308077228    | 4.117697316    | 6.006057171    |
| 5.04498517     | 11.00689214    | 4.348535025    | 4.208963372    | 8.125052749    |
| 7.680074993    | 9.749394091    | 4.042853405    | 3.595868227    | 6.975001783    |
| 6.29493111     | 9.898365239    | 3.880306071    | 1.939192952    | 4.755496921    |
| 4.844444797    | 12.86142495    | 3.493729718    | 1.354971157    | 6.391696803    |
| 2.896487067    | 12.01769833    | 2.672327882    | 3.412062087    | 5.931205847    |
| 6.70205503     | 11.00781674    | 3.564510825    | 3.697972183    | 6.526508958    |
| 4.30989888     | 10.42761692    | 2.119310661    | 3.718111424    | 7.253345534    |
| 7.407434301    | 12.04031392    | 3.848334985    | 2.775929049    | 8.516246718    |
| 4.209926083    | 9.747311335    | 3.84656249     | 4.038527574    | 6.17053907     |
| 4.21593978     | 10.92405914    | 4.434130207    | 2.891706654    | 6.384544398    |
| 6.93188319     | 10.52897248    | 6.386338767    | 0.18915764     | 7.927579458    |
| 5.337267462    | 10.38484377    | 3.708877538    | 3.26084081     | 5.211532794    |
| 4.505991257    | 10.21855336    | 3.673798532    | 3.569904731    | 7.326043097    |
| 3.408517457    | 11.79103589    | 3.046959725    | 0.272853601    | 5.578613641    |
| 4.002069122    | 10.20966649    | 2.482376655    | 4.225840361    | 8.201427075    |
| 4.796759253    | 12.29288644    | 4.884340794    | 3.353061287    | 6.725061292    |
| 6.115897736    | 10.93039907    | 3.490136786    | 4.916123849    | 8.257032794    |
| 5.147678047    | 11.63311089    | 5.855396733    | 3.929650397    | 7.321220141    |
| 6.917052783    | 9.611182762    | 2.417970131    | 5.103666166    | 8.912455473    |
| 3.944173724    | 10.14920707    | 4.190489336    | 3.308181871    | 7.351606936    |
| 3.301448832    | 10.627811      | 3.730091143    | 4.039946329    | 6.997549218    |
| 7.09192837     | 11.76356095    | 2.471671421    | 2.961535349    | 6.150144173    |
| 7.814585267    | 10.74611061    | 6.989370315    | 3.558104703    | 7.512443025    |

|             |             |             |             |             |
|-------------|-------------|-------------|-------------|-------------|
| 4.235750444 | 11.81432402 | 4.337644445 | 2.80311614  | 6.879338197 |
| 3.947279435 | 9.108488344 | 4.60715226  | 4.077151614 | 8.199830064 |
| 5.49797687  | 9.231517385 | 4.79256254  | 3.034963263 | 5.167728922 |
| 6.894439238 | 10.61675773 | 4.681721029 | 0.017688985 | 5.421207976 |
| 3.087510308 | 9.015160178 | 4.87490548  | 3.571766876 | 7.175017479 |
| 4.69357122  | 11.16872605 | 2.384751619 | 2.380310252 | 4.972267473 |
| 4.622878534 | 9.729101798 | 3.205700132 | 3.205085436 | 4.792957751 |
| 5.072042855 | 8.911738389 | 5.578421601 | 3.549272651 | 3.184972278 |
| 2.609581743 | 10.97047608 | 3.397714227 | 3.061960935 | 6.422981119 |
| 7.07901269  | 10.59186915 | 3.17195179  | 4.089516641 | 7.19202955  |
| 4.926929438 | 9.86721727  | 3.286323238 | 3.69950351  | 5.899240115 |
| 3.311191268 | 11.05402514 | 2.187467264 | 2.66747116  | 6.661673881 |
| 1.666352242 | 11.55535741 | 1.674470913 | 4.586582757 | 5.959374694 |
| 3.587701724 | 11.04424429 | 4.633990439 | 3.691846079 | 6.98754167  |
| 5.89104805  | 10.41503241 | 2.900418718 | 4.067370188 | 7.079988493 |
| 5.467776048 | 9.868014667 | 4.212288732 | 0.040422822 | 4.609249633 |
| 4.481109367 | 11.01013968 | 2.79837568  | 3.21597597  | 6.89835675  |
| 4.00948752  | 9.879086302 | 3.27892455  | 2.446362079 | 5.51585065  |
| 4.652371657 | 11.48219129 | 3.794276884 | 2.725460679 | 6.3928131   |
| 6.479710073 | 10.24434489 | 3.786941664 | 2.718618764 | 7.245945407 |
| 4.355566046 | 8.16997008  | 4.270654773 | 1.121739964 | 6.806351599 |
| 3.590188426 | 9.633944727 | 3.350579175 | 2.257395146 | 7.186085218 |
| 4.871066569 | 9.747783545 | 3.678734658 | 3.611418753 | 7.088420389 |
| 2.233396654 | 9.880031985 | 4.51823836  | 3.058165726 | 5.407838793 |
| 5.664090456 | 11.64352787 | 1.522908304 | 3.691526809 | 7.888129094 |
| 4.555667684 | 12.63796901 | 4.219159282 | 2.558856605 | 5.992470889 |
| 4.389387535 | 10.47942822 | 4.831391294 | 3.601064125 | 6.230700302 |
| 3.275553    | 10.01114688 | 4.10866359  | 2.093198488 | 3.566647934 |
| 2.890564122 | 9.636126266 | 3.313996755 | 2.996308797 | 8.208439457 |
| 4.528938142 | 8.547315542 | 3.588593996 | 1.732412466 | 3.270253816 |
| 2.040243918 | 11.323603   | 4.87976997  | 2.484851226 | 7.181068557 |
| 3.012647467 | 10.1340258  | 2.89201586  | 1.520280082 | 7.164251831 |
| 3.804474364 | 11.81578341 | 4.025711376 | 0.305963974 | 5.949530259 |
| 4.757233857 | 10.60881866 | 4.70275451  | 2.809476983 | 7.079214094 |
| 4.511690379 | 11.87079022 | 2.948991752 | 1.76988851  | 6.087568674 |
| 5.865397384 | 11.61640026 | 3.098987995 | 1.602546137 | 6.545582049 |
| 4.700998838 | 11.40448722 | 3.887274059 | 2.980325082 | 6.075993149 |
| 9.064471294 | 10.88016636 | 4.245222393 | 2.064204894 | 5.24762509  |
| 4.947861037 | 10.87525406 | 6.134979148 | 2.54003284  | 4.021475376 |
| 2.870982764 | 8.843453707 | 3.956876819 | 2.990869904 | 7.538513356 |
| 5.66653405  | 10.04375196 | 3.578662119 | 4.231607781 | 7.921893183 |
| 4.12639976  | 10.75073993 | 4.004752792 | 3.727646845 | 8.259753277 |
| 5.199842052 | 12.29684416 | 4.040941408 | 3.655396048 | 7.4668468   |
| 7.04425     | 9.420642274 | 2.093700654 | 2.09304048  | 5.018853025 |
| 4.887514224 | 9.909735042 | 4.606134067 | 2.090980923 | 4.190341615 |
| 4.034289003 | 9.204095709 | 3.306690894 | 1.367443045 | 6.416730606 |
| 3.889622979 | 9.88270119  | 3.568025115 | 2.306646629 | 5.596811406 |
| 4.514663578 | 11.07862462 | 2.411123172 | 3.286216866 | 8.15300178  |
| 5.950812884 | 9.793324391 | 5.524513562 | 1.803321707 | 6.413297076 |
| 5.962247909 | 9.992284154 | 3.758927662 | 3.573809686 | 6.292687131 |
| 6.272977442 | 9.226673271 | 4.705502511 | 2.052067042 | 8.434761244 |
| 7.477603593 | 12.57456672 | 4.656995682 | 5.102528597 | 8.867755813 |
| 4.932506629 | 9.462201428 | 3.273283403 | 3.515678107 | 6.706850834 |
| 5.370057187 | 8.474150365 | 4.213148908 | 2.833250278 | 5.307196136 |
| 5.26515718  | 9.200651935 | 3.861600682 | 3.505483788 | 7.974273313 |
| 3.535361647 | 9.760741986 | 2.880005418 | 3.533412851 | 7.447173885 |
| 3.291105048 | 9.830347024 | 3.119461393 | 2.433296376 | 5.521816016 |
| 4.300443134 | 11.31220155 | 4.9784949   | 3.374782447 | 7.850685101 |

|             |             |             |             |             |
|-------------|-------------|-------------|-------------|-------------|
| 7.013333022 | 11.33646716 | 4.25749125  | 2.521748482 | 6.198670472 |
| 4.459136781 | 9.285315717 | 3.932483868 | 2.329090244 | 8.6073954   |
| 10.04458412 | 9.984476199 | 3.158796527 | 2.522856789 | 8.28598953  |
| 4.201940566 | 10.49000681 | 5.435020181 | 3.417478067 | 7.996842923 |
| 6.322679687 | 12.0869611  | 4.671548099 | 1.701676884 | 6.545682192 |
| 5.502391012 | 11.28650525 | 4.736553204 | 2.424007237 | 4.819301122 |
| 6.703558051 | 10.62377453 | 5.149757901 | 2.406519955 | 7.56396329  |
| 8.789350388 | 10.96219093 | 4.193868253 | 1.852643852 | 3.770702428 |
| 3.19989221  | 10.97883851 | 3.731038206 | 3.199279564 | 7.192338025 |
| 1.168395438 | 9.505122109 | 2.553564346 | 1.789839906 | 7.074772908 |
| 3.918733638 | 9.318788569 | 2.292886485 | 1.855360822 | 4.143837791 |
| 5.671719643 | 11.15419273 | 3.521741531 | 3.192832729 | 6.423446444 |
| 1.935999781 | 9.489305038 | 3.219242472 | 3.58065315  | 5.973432796 |
| 7.45178655  | 11.54071879 | 3.748570782 | 3.216097254 | 6.510355297 |
| 4.313221761 | 9.800149394 | 4.311651264 | 3.595177832 | 6.639773715 |
| 7.432465808 | 10.01956102 | 3.170880942 | 2.331556527 | 5.605611872 |
| 4.474115631 | 9.349479887 | 3.658463932 | 3.744219911 | 6.308722561 |
| 5.324678585 | 8.7966728   | 3.02501233  | 1.769030139 | 10.04402004 |
| 1.788462217 | 12.30903027 | 3.091316378 | 1.786328849 | 6.915699589 |
| 8.403669369 | 11.59069755 | 3.914892881 | 1.556125862 | 7.390928231 |
| 4.981022592 | 11.11728735 | 3.488793172 | 1.850128739 | 6.297035059 |
| 4.121741976 | 9.390031103 | 3.244169148 | 1.454954635 | 6.770173244 |
| 5.418877606 | 10.09477016 | 3.519552286 | 0.038428083 | 6.953645879 |
| 4.019815178 | 9.849092933 | 4.382307491 | 0.040276187 | 6.936092643 |
| 2.173292531 | 9.644502243 | 4.40358661  | 2.963633718 | 5.047537842 |
| 5.236942578 | 10.28617817 | 2.415879533 | 3.908530024 | 7.318836983 |
| 1.92287142  | 11.12281259 | 3.495260433 | 1.922722046 | 6.870080723 |
| 4.138475142 | 9.491398052 | 5.565838765 | 3.898052023 | 7.098185048 |
| 5.215833116 | 10.11503956 | 2.005288281 | 2.327413566 | 7.415872444 |
| 5.773681287 | 10.95053361 | 5.299546816 | 1.90535072  | 5.146463461 |
| 6.8861931   | 8.897601215 | 0.208873792 | 1.631129004 | 5.657972145 |
| 5.528020491 | 11.56720842 | 5.195326586 | 3.599679862 | 4.747439412 |
| 10.78382976 | 9.979572352 | 5.173509328 | 2.662321938 | 7.789344112 |
| 6.066179716 | 9.241623361 | 4.949295295 | 2.038589717 | 4.959416147 |
| 6.213534704 | 10.17197322 | 3.912845107 | 3.062566016 | 7.156977326 |
| 7.170372941 | 8.55634635  | 4.744755363 | 3.264615825 | 3.907195826 |
| 6.924390243 | 11.474923   | 3.611914292 | 3.451804614 | 8.71269956  |
| 5.073245103 | 9.72751145  | 4.904516427 | 0.644091384 | 8.666699042 |
| 5.849657551 | 11.11422148 | 4.392473373 | 2.578070472 | 7.316339921 |
| 4.60817187  | 10.21148002 | 3.872142075 | 3.946015577 | 7.04465418  |
| 7.296829412 | 9.533802382 | 3.549461477 | 3.07347347  | 8.717161858 |
| 3.895484047 | 11.18259549 | 6.605385339 | 2.734318666 | 6.536630242 |
| 5.228855628 | 10.71743629 | 2.849992184 | 3.171263112 | 8.062755413 |
| 5.221078431 | 10.60077433 | 3.436831371 | 3.230398727 | 7.832929582 |
| 2.518949042 | 11.05916202 | 3.252107768 | 3.253286827 | 6.31711741  |
| 1.088303705 | 9.79095001  | 1.731393428 | 3.494797066 | 7.018213222 |
| 5.053467177 | 10.69929225 | 4.204159873 | 3.703004312 | 6.416491839 |
| 3.138800364 | 11.97497423 | 4.044975202 | 3.792977488 | 5.057955674 |
| 4.358244058 | 10.9065749  | 3.156198732 | 3.645843455 | 6.960082844 |
| 3.060202752 | 10.34596958 | 3.288784397 | 3.649116445 | 6.409144273 |
| 3.606291871 | 11.05144182 | 4.501819517 | 3.514668996 | 5.835290592 |
| 5.310129325 | 10.32295904 | 5.045378481 | 4.030088341 | 7.500947166 |
| 5.197636453 | 11.9533559  | 3.694627284 | 0.111041631 | 4.546616452 |
| 4.761555881 | 10.04558834 | 1.687855762 | 0.21306818  | 5.781752133 |
| 4.329426203 | 11.14823782 | 2.797320401 | 2.451908443 | 4.329456584 |
| 6.351738725 | 9.859326588 | 3.053492929 | 3.044649272 | 6.104479958 |
| 5.583816932 | 9.640418717 | 4.207764899 | 2.68261903  | 4.384967952 |
| 5.858787763 | 10.70842595 | 3.900335609 | 1.413172927 | 5.781877033 |

| hsa-miR-1266-5p | hsa-miR-326 | hsa-miR-891a-5p | hsa-miR-335-5p | hsa-miR-501-5p |
|-----------------|-------------|-----------------|----------------|----------------|
| 4.854690489     | 3.378654468 | 3.148904064     | 5.00210498     | 4.048119184    |
| 4.362104664     | 4.127132738 | 2.35735598      | 4.432616288    | 3.208170779    |
| 6.102416766     | 3.659819545 | 0               | 5.784352309    | 3.753592941    |
| 5.29181614      | 4.232953905 | 4.355887222     | 4.295051077    | 4.358031024    |
| 6.485416426     | 5.551091988 | 3.547927303     | 5.707679055    | 4.550022925    |
| 2.488890275     | 4.272386044 | 1.120300348     | 5.319492294    | 3.348637545    |
| 1.769743932     | 4.019062405 | 5.601497284     | 4.366225947    | 1.773578476    |
| 2.726010394     | 4.945681049 | 0               | 6.23772054     | 3.874765172    |
| 5.431755464     | 2.948280013 | 0               | 3.318088393    | 3.932734008    |
| 5.6039027       | 3.262553247 | 4.825245253     | 6.477433732    | 4.674941413    |
| 6.422874105     | 4.768612999 | 0.138534296     | 4.692597024    | 3.37759199     |
| 4.424712169     | 3.067929231 | 1.350651319     | 5.852686094    | 3.965724961    |
| 2.734262637     | 2.925899041 | 2.925885169     | 6.204496607    | 3.246372508    |
| 6.025254163     | 4.175208143 | 3.685926343     | 5.997165898    | 4.369433414    |
| 6.662653977     | 3.410814502 | 7.455751714     | 4.704006563    | 4.120119756    |
| 2.706217503     | 4.117243478 | 10.65983382     | 4.120935649    | 2.368945125    |
| 4.915846679     | 4.885813512 | 3.213564052     | 5.042594594    | 3.89455164     |
| 8.30483164      | 4.513467124 | 3.747077365     | 4.898420525    | 4.975592723    |
| 5.587711838     | 3.817776264 | 1.461808483     | 4.761366944    | 3.642382992    |
| 3.265816475     | 4.642109686 | 2.945135699     | 5.07000143     | 4.264030195    |
| 3.539393218     | 0.480188149 | 0.514356254     | 6.084250153    | 3.884014588    |
| 5.967982336     | 2.525941381 | 7.72807789      | 4.851587352    | 2.525857729    |
| 5.098149639     | 2.418538717 | 6.253056026     | 4.064077531    | 4.339944717    |
| 3.928413085     | 4.524169116 | 2.384848463     | 4.407209678    | 2.389158531    |
| 4.419352102     | 3.244608107 | 0               | 5.553028961    | 3.589327344    |
| 4.857336122     | 3.830959412 | 1.213060698     | 5.26690805     | 3.730688191    |
| 6.568528851     | 3.865518176 | 3.056043865     | 5.104654501    | 6.892872517    |
| 4.702875735     | 4.692737678 | 5.371982933     | 3.43329663     | 2.336309894    |
| 5.611146687     | 4.530268106 | 1.809429325     | 5.991261239    | 4.927796907    |
| 3.972063175     | 4.855995822 | 1.32512049      | 4.852742231    | 4.894513299    |
| 0.141555797     | 5.266191809 | 5.334477242     | 3.599872501    | 3.595660595    |
| 4.827240934     | 2.1555086   | 0.036961434     | 4.08734959     | 4.350035043    |
| 4.229190141     | 3.308342442 | 2.612976878     | 5.540087688    | 2.884197706    |
| 3.837006492     | 3.161319149 | 2.093795773     | 6.344960655    | 4.568720134    |
| 4.784075194     | 5.303622873 | 1.659956111     | 6.123585174    | 3.976174198    |
| 4.83242023      | 3.470725136 | 12.40141703     | 6.59590922     | 4.01606207     |
| 4.321520088     | 3.494244863 | 3.671765115     | 5.047074824    | 3.49402715     |
| 4.903975958     | 3.41390028  | 1.060705692     | 5.097077758    | 4.000905684    |
| 4.250402364     | 4.154822052 | 0.052201536     | 3.043622024    | 2.816415717    |
| 4.896199428     | 2.119314678 | 2.118529178     | 5.464550021    | 1.695066702    |
| 4.510244405     | 3.090132691 | 4.797768859     | 5.038357169    | 2.94031857     |
| 5.768768623     | 4.499320466 | 5.040732881     | 3.037846509    | 4.287626989    |
| 4.636851933     | 4.326517135 | 3.789507783     | 5.168371244    | 4.208599989    |
| 5.190789147     | 4.430872263 | 0.213341766     | 3.633850769    | 6.536720139    |
| 4.317392588     | 3.885205673 | 5.663192899     | 4.436849381    | 2.197658919    |
| 5.070714414     | 3.673677846 | 7.242460567     | 6.319097738    | 2.681096744    |
| 3.930139504     | 3.684252915 | 4.867779429     | 4.615359126    | 3.047560852    |
| 4.550862863     | 4.941736986 | 2.031100669     | 4.640544984    | 3.097688418    |
| 4.398655244     | 3.928934228 | 5.036760807     | 4.707236369    | 4.563258218    |
| 1.693311042     | 4.1033724   | 0.24530025      | 6.987343914    | 2.860238789    |
| 4.667299375     | 3.802844695 | 0.110543431     | 3.946854547    | 4.070212969    |
| 3.579906405     | 5.907011391 | 1.271921009     | 6.233892072    | 3.050969685    |
| 4.538087188     | 2.813519883 | 3.026101649     | 4.352148195    | 4.233840535    |
| 3.535193346     | 3.020043111 | 0.183248396     | 5.947526915    | 4.062446458    |
| 3.865616926     | 4.165669135 | 1.716035879     | 3.749511592    | 3.748412782    |
| 4.677100307     | 5.719664926 | 0               | 5.056472532    | 6.740062538    |



|             |             |             |             |             |
|-------------|-------------|-------------|-------------|-------------|
| 3.517798089 | 4.533475235 | 4.540451623 | 4.235216856 | 2.811455928 |
| 4.484944114 | 4.643630212 | 0.640149227 | 6.399459721 | 3.827630859 |
| 5.286228277 | 4.944692058 | 1.614024252 | 3.496061641 | 4.359361293 |
| 6.121534621 | 4.3442268   | 2.081961834 | 4.621321887 | 3.902499313 |
| 7.131421961 | 4.321794254 | 0           | 5.687886014 | 5.372192718 |
| 5.202775527 | 2.384850507 | 4.24767225  | 3.225925072 | 4.017502843 |
| 6.981014962 | 5.24724078  | 3.737348253 | 2.842327489 | 3.94381207  |
| 4.212417339 | 4.165879795 | 5.782600548 | 4.260038562 | 4.906700291 |
| 4.482104289 | 1.958865437 | 10.50508296 | 4.929206611 | 4.532075396 |
| 5.172087221 | 4.324044147 | 0.000410991 | 6.757076411 | 4.172032759 |
| 3.724566139 | 4.547221694 | 0.17983573  | 5.283696745 | 1.529372644 |
| 6.543272244 | 2.187458107 | 0           | 4.369467293 | 3.756482671 |
| 4.937189323 | 3.899346516 | 0.236179146 | 4.742764246 | 4.3732376   |
| 4.168572948 | 4.361700079 | 0.864687953 | 4.359933688 | 4.026401932 |
| 4.846827599 | 4.980812813 | 1.911742573 | 4.799419701 | 4.594386469 |
| 5.834194847 | 4.118931436 | 0.044189228 | 4.302394538 | 6.217106929 |
| 4.480468787 | 3.024749434 | 1.150471075 | 4.480835666 | 4.317181226 |
| 4.944403799 | 4.473541402 | 2.456363088 | 4.008636091 | 4.719658458 |
| 5.528820619 | 2.533930647 | 1.756070311 | 5.625813208 | 3.516812212 |
| 4.691181066 | 2.527156254 | 3.60652843  | 6.480474497 | 3.50955457  |
| 8.102971006 | 6.49109762  | 1.119303563 | 3.76680383  | 3.639145791 |
| 5.875162249 | 3.072487833 | 2.724277676 | 5.963470637 | 2.265608536 |
| 4.806014256 | 3.246902514 | 2.630833226 | 5.976764553 | 3.67847943  |
| 4.07707732  | 4.175489049 | 1.799949027 | 3.725792739 | 3.967278188 |
| 5.451476931 | 3.511386081 | 0.177346851 | 5.274976938 | 2.199079927 |
| 4.725579598 | 1.975517888 | 0           | 6.099506127 | 4.363441173 |
| 5.459753285 | 4.172191936 | 6.781623069 | 5.409358414 | 5.105618363 |
| 5.504539444 | 2.420045068 | 6.0675489   | 4.696201317 | 3.275170186 |
| 5.928921911 | 4.868280969 | 0.491061187 | 7.567502676 | 3.238435907 |
| 4.578331679 | 3.680418411 | 0.806428037 | 5.367980241 | 4.429558346 |
| 3.539555426 | 2.832314417 | 0.127457568 | 5.858597276 | 4.72694634  |
| 5.849189808 | 2.759162839 | 4.716079989 | 4.680715148 | 4.825701123 |
| 1.950127291 | 1.953690282 | 5.379364912 | 4.425538436 | 0.333635291 |
| 4.909235329 | 4.757207289 | 1.001451286 | 5.461796535 | 4.461739115 |
| 3.306838047 | 3.301585725 | 2.95064892  | 4.209130191 | 3.582773751 |
| 4.153111673 | 2.752033553 | 5.563728754 | 5.17722417  | 5.428772361 |
| 2.401761354 | 4.046673761 | 0           | 2.620133363 | 3.887161467 |
| 4.245847473 | 5.661714781 | 5.435369192 | 2.65449584  | 4.719874301 |
| 4.739200158 | 4.985357764 | 2.141700483 | 4.70030489  | 5.078320333 |
| 6.451914933 | 2.982128573 | 1.057669486 | 6.815371467 | 3.585407833 |
| 3.768475339 | 4.520420112 | 0           | 5.825953004 | 3.677271851 |
| 3.411589779 | 2.373552662 | 1.929063473 | 4.008786159 | 4.749447062 |
| 1.548686996 | 1.548518168 | 1.548915364 | 4.412059557 | 3.125091252 |
| 5.397324269 | 3.566043967 | 3.428295041 | 5.321538712 | 1.671363175 |
| 4.983585039 | 5.132918399 | 4.750954208 | 2.790765904 | 4.246381402 |
| 5.612684921 | 3.7169668   | 1.763916679 | 7.121271522 | 4.10632981  |
| 3.683326875 | 0.98893867  | 0           | 5.474043385 | 4.304603337 |
| 4.880944633 | 3.574085087 | 4.60400513  | 4.806716875 | 2.197816524 |
| 6.189698215 | 4.514333804 | 2.47886227  | 3.998028762 | 5.665353713 |
| 4.293293511 | 3.193260229 | 1.611941609 | 5.446974672 | 4.091601057 |
| 4.14893153  | 6.945157806 | 0.012127184 | 5.791101423 | 3.519181574 |
| 2.875392676 | 6.419108311 | 6.168666016 | 7.108090449 | 4.656488497 |
| 3.272573131 | 3.512135352 | 0           | 5.326142841 | 3.618340774 |
| 5.570761723 | 6.324920588 | 4.816744301 | 9.071479885 | 3.285691285 |
| 3.005208868 | 5.09052173  | 2.445829745 | 5.0287759   | 2.606456737 |
| 4.602060646 | 0.014912705 | 0.015397228 | 5.123699523 | 5.032466811 |
| 5.486195471 | 4.770228023 | 0.025293724 | 5.338202174 | 2.434516943 |
| 2.847703513 | 3.751448265 | 0           | 4.561911766 | 4.657584183 |

|             |             |             |             |             |
|-------------|-------------|-------------|-------------|-------------|
| 3.013528626 | 1.826965098 | 3.892079116 | 4.933015463 | 4.08177251  |
| 4.247548094 | 4.253524647 | 6.587436039 | 7.045645896 | 4.195032155 |
| 5.003680796 | 2.874242089 | 5.51164062  | 5.745084976 | 3.396255138 |
| 3.92434433  | 4.503443833 | 0           | 5.259819859 | 4.748876175 |
| 4.318232518 | 5.055848297 | 5.611536103 | 3.140950148 | 4.234308545 |
| 4.816949859 | 3.79908216  | 3.802745389 | 6.147708579 | 5.623187199 |
| 5.266687915 | 3.606851382 | 5.915116575 | 5.523276164 | 5.149298336 |
| 2.441175129 | 4.805991739 | 2.947954308 | 3.770236065 | 4.264270144 |
| 4.786548155 | 2.349718242 | 2.836499467 | 5.617003812 | 5.35348591  |
| 5.584897077 | 2.82283056  | 3.245951083 | 4.257590818 | 4.57882965  |
| 5.804801752 | 0.06958668  | 1.854065097 | 4.338292465 | 4.140580289 |
| 5.297982268 | 4.375549514 | 4.530555472 | 3.661838242 | 3.903368108 |
| 3.748261866 | 2.717633483 | 0.095848837 | 5.575230236 | 4.129672784 |
| 6.094806374 | 5.093932333 | 7.94582422  | 4.573228819 | 3.748598594 |
| 4.603341913 | 3.947903248 | 1.696531015 | 5.979486162 | 4.229024602 |
| 4.473971457 | 0.080441223 | 0.083473122 | 5.250780358 | 4.382198815 |
| 6.875470993 | 3.807756334 | 2.829962449 | 4.99403589  | 3.491240334 |
| 8.096491166 | 4.035940627 | 6.854751631 | 6.32601007  | 1.153137    |
| 6.55072481  | 4.788978136 | 3.38079075  | 7.567677883 | 2.979286563 |
| 3.70382308  | 3.548384086 | 1.855919001 | 5.025212824 | 4.152684678 |
| 3.784692673 | 2.891957494 | 5.733073265 | 4.13727611  | 3.909613965 |
| 6.528519619 | 6.088152505 | 1.46058141  | 5.233732975 | 3.649046512 |
| 3.786101035 | 2.999220942 | 3.902762376 | 5.378817265 | 3.658357605 |
| 6.559323081 | 3.528803696 | 1.753249842 | 4.972127531 | 5.259633765 |
| 5.247013449 | 2.632277669 | 1.495791445 | 5.586566599 | 3.686196549 |
| 1.6674763   | 2.089891347 | 1.067182039 | 6.258068681 | 3.687747438 |
| 6.475072293 | 5.789116698 | 2.913081133 | 6.171861825 | 3.908922248 |
| 3.881305654 | 3.569343025 | 6.742725132 | 2.96580689  | 5.226877346 |
| 5.135632354 | 2.813167391 | 6.960656617 | 5.135645089 | 3.591041787 |
| 5.231852072 | 2.633584813 | 1.902592403 | 4.809248409 | 5.804601602 |
| 6.146603621 | 4.874416074 | 4.034362714 | 5.944965736 | 3.647592215 |
| 4.534494602 | 5.666313419 | 3.296577714 | 4.666257988 | 4.391609536 |
| 4.407825364 | 4.893272362 | 1.054389523 | 5.895140317 | 4.786182523 |
| 4.465052681 | 3.709667258 | 0.127078844 | 5.025434449 | 5.203139589 |
| 4.611970471 | 4.094457854 | 3.166946639 | 5.48008961  | 3.70421008  |
| 4.560994324 | 5.856916001 | 0.020076663 | 2.677438852 | 5.494069318 |
| 2.862502372 | 5.659925683 | 4.695467608 | 5.259575421 | 3.612085942 |
| 5.797539221 | 4.141892093 | 0           | 5.710193493 | 3.913914829 |
| 7.341122764 | 4.654159051 | 2.1035209   | 6.548233335 | 3.839142753 |
| 4.889621925 | 3.128463068 | 0           | 6.063650212 | 4.053735106 |
| 6.014789128 | 5.125748515 | 0.841177526 | 6.682258254 | 2.920078904 |
| 4.514151982 | 4.319552083 | 2.020205813 | 3.894496883 | 6.265173693 |
| 4.010677671 | 5.361990029 | 7.541783856 | 6.507880296 | 3.305201525 |
| 3.011272282 | 3.437262016 | 2.397260341 | 4.783724615 | 4.359158973 |
| 4.880433367 | 4.784925802 | 1.939219935 | 4.319232532 | 5.056043212 |
| 4.904186897 | 4.159622754 | 4.000176287 | 7.693389878 | 2.519913354 |
| 3.560000215 | 3.187336231 | 2.685795178 | 4.574990194 | 4.399021191 |
| 6.290135296 | 2.304261877 | 2.638083722 | 4.156460476 | 5.106819101 |
| 3.879004824 | 5.07025963  | 0.227289964 | 4.057264794 | 3.871507108 |
| 3.664456057 | 3.956922041 | 3.059909261 | 6.355880417 | 4.67638074  |
| 5.495523051 | 2.310759445 | 2.715441507 | 5.242853054 | 5.713200224 |
| 5.201410696 | 4.18000532  | 4.357823689 | 5.844203391 | 4.057042783 |
| 2.818096643 | 3.32240611  | 2.816863637 | 4.717741867 | 3.09177833  |
| 5.547793452 | 3.714412307 | 0.241543443 | 3.721981945 | 3.713879756 |
| 5.619966863 | 3.302194175 | 0.117695798 | 4.102568448 | 6.254992182 |
| 6.158885601 | 3.481983723 | 1.991791052 | 4.593578892 | 1.345163034 |
| 2.782604695 | 2.427790197 | 2.134782799 | 4.777442848 | 6.183065044 |
| 4.596419297 | 3.371858144 | 6.990732884 | 4.503015543 | 4.286471128 |

| hsa-miR-34c-5p | hsa-miR-6503-5p | hsa-miR-9-5p | hsa-let-7c-3p | hsa-miR-130a-3p |
|----------------|-----------------|--------------|---------------|-----------------|
| 2.528364061    | 0.077170605     | 10.02185032  | 5.615023827   | 8.981107416     |
| 1.025753643    | 0.004863409     | 7.721145953  | 5.947998757   | 8.6001168       |
| 3.147133666    | 2.202081828     | 7.250975048  | 3.95796968    | 6.55449863      |
| 1.810926718    | 0.870190432     | 12.59028256  | 6.051869197   | 6.944210764     |
| 1.656286912    | 0.011083813     | 11.95934219  | 3.409820199   | 4.847111575     |
| 2.488512313    | 1.109701981     | 12.51331063  | 4.435276307   | 8.136583102     |
| 2.476887895    | 0.138914316     | 11.54467538  | 4.366326531   | 7.573538644     |
| 4.35694384     | 0               | 10.5242586   | 4.030922704   | 8.136455343     |
| 0              | 0.779248816     | 9.004767474  | 3.930287705   | 6.086400272     |
| 2.395818098    | 0               | 8.137509855  | 4.007523886   | 8.455142873     |
| 1.418340379    | 1.35948493      | 12.00788788  | 7.42692957    | 9.158528481     |
| 2.007733285    | 2.693044461     | 9.836358256  | 6.555400122   | 8.695180475     |
| 0              | 0               | 6.562373606  | 5.873425448   | 7.361191224     |
| 0.076097184    | 1.221370335     | 12.09026386  | 1.248539674   | 5.080443433     |
| 1.546011528    | 1.550873492     | 9.322644263  | 5.234124985   | 6.439846807     |
| 0.087618571    | 1.251958644     | 7.842133128  | 4.596187946   | 6.724644147     |
| 2.699989947    | 1.247731392     | 15.81215158  | 5.131314096   | 7.693032603     |
| 2.492919125    | 0               | 16.16824693  | 5.797194013   | 5.171956971     |
| 0.147581294    | 2.033859923     | 9.002771869  | 6.858372796   | 6.306475987     |
| 0              | 0.966285736     | 8.749908989  | 6.297680569   | 9.005481191     |
| 0.464659756    | 0.22222052      | 8.039634642  | 7.348518524   | 7.902714585     |
| 4.837908692    | 1.986952215     | 11.61824887  | 3.145380596   | 8.106544857     |
| 0.885744845    | 0               | 9.319934291  | 3.520205701   | 6.038836625     |
| 0.226204371    | 0.125058456     | 10.89377955  | 7.567166492   | 8.123741217     |
| 3.369819417    | 0               | 7.860881932  | 3.243944234   | 6.61457184      |
| 2.611194819    | 0.465826957     | 8.878824428  | 5.013383166   | 7.757443062     |
| 2.862367215    | 0.007202628     | 9.326176825  | 2.374478251   | 6.968302503     |
| 1.645092235    | 1.53695333      | 11.87080436  | 4.705055973   | 6.995343403     |
| 1.811717188    | 0.035331475     | 8.04353735   | 3.270954211   | 6.703277315     |
| 2.017821477    | 2.538389315     | 8.643236141  | 5.422315774   | 7.506059931     |
| 2.545429636    | 1.371432476     | 9.531691765  | 3.775354544   | 6.666061126     |
| 2.976579403    | 0.022367827     | 7.130859813  | 4.768512283   | 7.417314519     |
| 1.844641793    | 0.040478732     | 8.522289486  | 5.083714932   | 7.921714501     |
| 3.971851128    | 0.692076142     | 9.025071586  | 4.643527518   | 8.816846855     |
| 2.211035834    | 2.266252881     | 8.380798377  | 5.570336118   | 6.999896854     |
| 0              | 0               | 7.830982828  | 1.637832914   | 5.472443435     |
| 0.109400259    | 0.065701716     | 8.492771686  | 6.66027223    | 6.962114863     |
| 3.413424383    | 1.649677442     | 9.246691632  | 4.797078284   | 8.389304415     |
| 1.785119777    | 1.148163658     | 10.35486899  | 2.215580222   | 6.599861332     |
| 4.307511296    | 1.081892874     | 14.41744822  | 2.938131821   | 8.96554189      |
| 0              | 0               | 11.31745104  | 5.110266442   | 6.016523209     |
| 0.007452681    | 0.004851024     | 7.842473072  | 5.94789453    | 7.678160315     |
| 2.107591185    | 0.08160402      | 10.47485024  | 5.736863457   | 8.019172409     |
| 2.303372056    | 2.592422272     | 8.497590105  | 6.814501361   | 7.595212531     |
| 1.522251511    | 0.095505933     | 13.9025992   | 3.514289318   | 6.154195674     |
| 0.91464807     | 0               | 7.652557136  | 5.320022318   | 6.39798942      |
| 2.57178547     | 0.153461682     | 6.846958533  | 7.602750831   | 6.593465856     |
| 0.11758779     | 0.070188826     | 8.437954823  | 4.001731497   | 10.0992109      |
| 2.109358189    | 1.824535575     | 13.48075768  | 4.398332497   | 7.294027902     |
| 0.228091523    | 0.125942335     | 7.742450435  | 6.768201698   | 9.682247721     |
| 1.339563328    | 1.918750085     | 10.26378509  | 7.452569502   | 7.907567447     |
| 0.745743606    | 2.988612549     | 8.04047121   | 6.069518504   | 8.885261877     |
| 3.12495191     | 1.715715003     | 10.64205606  | 4.982022573   | 8.265982744     |
| 1.539104183    | 0.098470562     | 9.046643557  | 5.35778719    | 8.593227299     |
| 2.963508116    | 1.098405681     | 8.654339221  | 6.439005068   | 7.63353101      |
| 2.260493538    | 2.719780107     | 8.142365904  | 6.615137764   | 7.81790867      |

|             |             |             |             |             |
|-------------|-------------|-------------|-------------|-------------|
| 1.371007444 | 1.320932826 | 8.700778259 | 4.539548742 | 7.536617545 |
| 3.379652849 | 1.844876294 | 9.716129763 | 4.905399528 | 7.361323657 |
| 1.024175466 | 1.021930181 | 8.486272103 | 4.622964626 | 6.608818127 |
| 1.661089524 | 1.05666508  | 14.02851342 | 5.684127051 | 7.357975714 |
| 2.662831337 | 0           | 8.657433369 | 6.369077023 | 7.981348467 |
| 0.091719289 | 0.055824096 | 8.903680033 | 1.941020565 | 5.846874517 |
| 1.024092216 | 2.026842929 | 9.953495067 | 3.035504747 | 8.8301913   |
| 1.484760078 | 3.074779041 | 10.06243647 | 3.882735236 | 8.104982638 |
| 3.589020152 | 0.764180928 | 12.89338359 | 4.528480985 | 7.7917928   |
| 2.809326755 | 1.586404755 | 13.43293289 | 6.956386617 | 8.699180313 |
| 0.168406193 | 0.096886589 | 7.929706462 | 7.127697208 | 6.474865037 |
| 1.467535532 | 0.911997855 | 10.20337997 | 5.269911917 | 7.364566427 |
| 2.367607704 | 0.122055102 | 9.593599024 | 6.313355773 | 8.665968977 |
| 1.41482076  | 1.433670688 | 11.02667956 | 4.773176865 | 8.034431888 |
| 1.503317409 | 0           | 10.1875771  | 4.846635478 | 8.576267592 |
| 1.141702481 | 0.026573867 | 8.679234204 | 2.183961116 | 6.895193992 |
| 2.199059456 | 0.02872032  | 10.84837547 | 5.236066745 | 7.92757088  |
| 1.756260166 | 0.135962157 | 9.826264141 | 3.805624205 | 6.879465504 |
| 4.098256182 | 1.383848947 | 11.73756898 | 4.506654816 | 6.714115383 |
| 2.882553976 | 0.827038863 | 13.24513992 | 6.162131024 | 7.677487841 |
| 3.174766028 | 1.710384342 | 11.68202266 | 6.95872215  | 4.508271051 |
| 3.068347419 | 1.488952255 | 12.0930858  | 6.157472148 | 6.572320113 |
| 2.074727435 | 1.198369481 | 7.129307802 | 4.544462617 | 7.775666274 |
| 1.802160145 | 0.033837887 | 10.4500981  | 2.233849378 | 7.102458065 |
| 0.166120233 | 0.095726307 | 10.91984946 | 3.515879778 | 9.133568775 |
| 0.981558568 | 2.300574321 | 7.327438313 | 4.363178889 | 7.858600873 |
| 1.96466538  | 0           | 11.09861143 | 5.069725446 | 7.155630392 |
| 0.020916285 | 1.06444234  | 9.183528387 | 0.021794608 | 8.944301955 |
| 4.136878897 | 0.500186285 | 13.24676194 | 4.586113254 | 7.956056403 |
| 0.802821739 | 0           | 6.740074802 | 4.839486797 | 9.350031056 |
| 3.334861487 | 1.334404655 | 10.97463111 | 4.88802859  | 7.85908855  |
| 6.353447459 | 1.57060881  | 10.96898522 | 3.865334769 | 8.400811238 |
| 1.952853887 | 0.16873569  | 12.48658912 | 4.246851549 | 5.621786828 |
| 3.002175043 | 2.001657931 | 8.657046227 | 4.250245126 | 6.046781533 |
| 3.294706845 | 0.139074952 | 10.16340898 | 4.868374129 | 7.326813913 |
| 5.1542905   | 0.109949791 | 15.37251834 | 5.102235854 | 8.494788977 |
| 1.430154209 | 1.447559031 | 13.74489679 | 4.549796251 | 6.877089078 |
| 2.064590562 | 1.044388186 | 12.6670722  | 5.832761417 | 7.899169875 |
| 1.59220099  | 0.721339355 | 11.22737266 | 2.140598628 | 6.31441412  |
| 3.2742661   | 0           | 7.275163522 | 2.981096951 | 6.346783887 |
| 1.805413351 | 0           | 11.36372843 | 5.009578967 | 8.252479612 |
| 2.70917373  | 1.874618125 | 8.424473958 | 5.079268088 | 8.852046678 |
| 1.548469327 | 0.972720729 | 11.15055748 | 5.706649126 | 7.140968191 |
| 0.020879998 | 0.013440886 | 8.573903301 | 5.469825071 | 6.88210718  |
| 2.482760829 | 1.208980375 | 8.881832906 | 4.136850671 | 6.934272638 |
| 1.367441295 | 0           | 8.936360884 | 2.072202318 | 9.533482385 |
| 2.983632547 | 0           | 10.19371924 | 2.983539707 | 6.85230585  |
| 0           | 0           | 8.511271296 | 6.153593188 | 7.738997417 |
| 3.033799786 | 0           | 13.84725575 | 4.405380425 | 6.359009306 |
| 3.051134443 | 1.460158445 | 8.611158244 | 4.085369531 | 7.8859161   |
| 1.633264507 | 0.007502479 | 16.86398203 | 1.632899086 | 6.490073159 |
| 8.876321878 | 2.770020644 | 8.803210708 | 7.211543345 | 8.819507895 |
| 3.273955156 | 1.860935512 | 9.739653751 | 4.803864569 | 8.577084792 |
| 2.164080755 | 1.870325839 | 14.36840454 | 5.275389804 | 9.012149341 |
| 2.052794884 | 2.124032985 | 7.8289404   | 4.298741521 | 7.040271368 |
| 5.363246824 | 1.045529753 | 11.83369882 | 5.505918696 | 7.987915414 |
| 3.581221569 | 1.073962013 | 15.46905672 | 6.469625864 | 8.497656629 |
| 1.718973294 | 1.75417507  | 9.372796234 | 5.458363122 | 8.241768331 |

|             |             |             |             |             |
|-------------|-------------|-------------|-------------|-------------|
| 3.635995857 | 0.147871205 | 8.445682961 | 6.734208446 | 7.751044054 |
| 4.616938512 | 2.081344009 | 9.495402186 | 5.555410945 | 7.225689333 |
| 1.741429089 | 0           | 8.032055345 | 2.304449799 | 7.992134989 |
| 4.352479115 | 1.759590916 | 9.832077814 | 3.879042408 | 8.537954238 |
| 3.139902414 | 1.087001161 | 17.17515908 | 4.235645438 | 6.908624759 |
| 3.039857285 | 1.91619193  | 9.313789197 | 2.768616062 | 6.34077822  |
| 2.842169587 | 2.087171915 | 9.348318946 | 6.031871104 | 8.191688131 |
| 1.430308029 | 0           | 9.641456069 | 1.436263068 | 5.821313262 |
| 3.489603675 | 1.018239986 | 10.63721651 | 5.646762996 | 8.015550657 |
| 4.899896851 | 0.032045599 | 8.448673666 | 1.168978922 | 7.989414841 |
| 2.626147611 | 0.042362421 | 13.82701642 | 3.497021809 | 5.516879398 |
| 2.506967312 | 1.725245761 | 12.79311035 | 5.420769559 | 7.37489197  |
| 3.217427559 | 0.055177918 | 10.02781767 | 4.133796058 | 7.067980456 |
| 4.508197313 | 1.028717692 | 12.51260817 | 4.634695001 | 7.399862805 |
| 1.697783885 | 1.083848466 | 8.596005527 | 6.100918068 | 8.251994609 |
| 0.07898986  | 1.229116454 | 10.48660459 | 5.092408024 | 8.407513373 |
| 4.184640037 | 1.236240144 | 12.98842445 | 3.655737039 | 8.354972197 |
| 1.769750408 | 0.028774904 | 12.59342733 | 4.693882276 | 6.840649469 |
| 4.277813439 | 1.162926014 | 11.74166189 | 4.120152966 | 6.876887112 |
| 2.0990134   | 0.696668202 | 9.384312175 | 5.415341964 | 6.954683774 |
| 0.066953944 | 1.196587196 | 10.01184924 | 5.894669028 | 6.883366745 |
| 3.246153357 | 2.062855316 | 9.91710705  | 3.497652923 | 8.311485376 |
| 2.17554513  | 2.735943195 | 10.71356786 | 5.964857168 | 8.432266698 |
| 3.007205817 | 0.026480385 | 9.668379757 | 6.94835786  | 7.117013199 |
| 2.175942335 | 0.092271909 | 8.634446871 | 3.867751478 | 6.261575255 |
| 3.270290053 | 1.06171936  | 10.1666435  | 5.317023242 | 9.197246045 |
| 3.082382505 | 0.946651477 | 12.87030077 | 4.299558743 | 6.133418302 |
| 2.302586774 | 2.213124292 | 9.186286219 | 4.650949245 | 6.449066354 |
| 0.001154277 | 0.000755297 | 9.512324634 | 5.621104614 | 8.377186247 |
| 0.309603806 | 2.38464368  | 8.044744215 | 4.199022547 | 6.759817726 |
| 1.633725989 | 0.114970086 | 12.52530873 | 5.900389575 | 6.936463099 |
| 0.751887589 | 2.488042978 | 8.911955109 | 5.303280447 | 7.045048033 |
| 2.072840075 | 2.06120056  | 9.40216011  | 5.788171861 | 6.883186488 |
| 0.119684713 | 0.07132939  | 7.84865839  | 4.649262393 | 8.414914788 |
| 1.553977507 | 0.695592899 | 9.009750377 | 5.48003516  | 8.572055368 |
| 2.085939858 | 1.653401523 | 10.0477892  | 1.064585717 | 6.496749928 |
| 3.992808811 | 0.03741399  | 11.9647271  | 5.212118518 | 7.288747516 |
| 1.505986653 | 0.663416281 | 8.031139452 | 4.18980892  | 8.056077788 |
| 4.556754777 | 1.414657368 | 8.89517877  | 4.070252438 | 9.313596972 |
| 2.896407452 | 0.674338539 | 7.888477672 | 3.418606561 | 7.943327942 |
| 2.091780604 | 0           | 9.005722903 | 4.590753771 | 6.906125415 |
| 0.35607154  | 0.18127998  | 8.50039752  | 7.685249169 | 7.461550395 |
| 0           | 0.908157208 | 7.936971114 | 6.390088408 | 7.513395197 |
| 0.095424549 | 0.057915736 | 8.826035473 | 4.987152366 | 6.950398908 |
| 2.257796929 | 1.535616155 | 9.003655072 | 4.511553485 | 7.531731483 |
| 3.894098773 | 1.119955541 | 8.315825992 | 5.042160361 | 7.404875174 |
| 1.272914886 | 2.284517652 | 9.680398146 | 4.208391699 | 6.844060625 |
| 2.637827797 | 1.208115495 | 10.50491933 | 3.664244664 | 6.471818685 |
| 2.342828841 | 2.185899248 | 10.34519646 | 4.057323308 | 8.458742397 |
| 4.197639448 | 1.928241497 | 11.14432943 | 6.01388591  | 9.564441276 |
| 6.474110644 | 0           | 13.34218808 | 3.784843007 | 9.231273521 |
| 3.284570839 | 0.939483087 | 10.25210417 | 4.426154534 | 7.75759864  |
| 2.475644432 | 0.069359216 | 10.11716429 | 5.84205528  | 7.223243888 |
| 0.224689281 | 0.124347266 | 9.929635268 | 6.618230307 | 8.30227015  |
| 2.011362691 | 1.31184121  | 10.07962892 | 4.850161258 | 7.866078412 |
| 2.439564123 | 1.300257    | 9.110793549 | 5.467950286 | 8.252493297 |
| 1.252991738 | 0           | 8.286165208 | 2.674207672 | 7.22919517  |
| 1.413695855 | 1.355725527 | 11.86927566 | 5.818462072 | 7.262428767 |

| hsa-miR-589-3p | hsa-miR-30c-1-3p | hsa-miR-190b-5p | hsa-miR-3200-3p | hsa-miR-3144-3p |
|----------------|------------------|-----------------|-----------------|-----------------|
| 2.076631344    | 2.073468456      | 2.853483373     | 1.417816347     | 0.107620201     |
| 2.033853365    | 2.843951379      | 1.616045041     | 1.616237068     | 0.006415061     |
| 2.759234311    | 2.219902662      | 3.301244328     | 5.989760543     | 0               |
| 2.789314901    | 2.125116762      | 0.85938777      | 4.526875718     | 2.390040954     |
| 3.54601007     | 1.058921306      | 1.655682903     | 3.673581073     | 3.250146459     |
| 3.174388511    | 2.158053255      | 0.033718321     | 1.732650178     | 1.120438486     |
| 3.279243766    | 1.766042881      | 3.254961218     | 3.301638708     | 1.732782138     |
| 1.91094873     | 2.736645098      | 1.388289847     | 6.440218511     | 0               |
| 4.07543763     | 3.433016559      | 3.43590312      | 2.79980996      | 0               |
| 3.730937558    | 2.186156151      | 1.250083346     | 6.360157733     | 0.732155985     |
| 2.075907651    | 2.85758331       | 0.119700672     | 2.871350926     | 0.107451375     |
| 3.486789325    | 2.445911096      | 0.101287112     | 2.793883405     | 0.091240799     |
| 4.315475671    | 4.383422973      | 0               | 1.524245414     | 0.950785675     |
| 3.349712443    | 2.318919944      | 1.881529855     | 4.765438896     | 1.872259481     |
| 3.274331762    | 2.953600972      | 3.952314801     | 5.563809215     | 2.763576408     |
| 3.864094984    | 2.968821389      | 2.360542074     | 1.286944959     | 2.678721975     |
| 2.14088936     | 2.541244692      | 2.543756602     | 1.215661146     | 3.54134178      |
| 4.568842637    | 1.326991973      | 0.791330084     | 6.205098535     | 5.491630181     |
| 2.583852265    | 3.949248819      | 6.819874789     | 4.115475257     | 2.105349017     |
| 3.266793813    | 2.946253803      | 0.963050635     | 2.270497287     | 0               |
| 3.006717113    | 3.454522675      | 0.406625717     | 3.043934598     | 0.346660911     |
| 4.748554291    | 2.515658336      | 0.118904045     | 4.500006932     | 3.322781132     |
| 2.638900846    | 3.525434234      | 1.847918327     | 2.160586598     | 2.646974191     |
| 2.380234333    | 3.45258465       | 5.21076536      | 3.486227999     | 0.180993652     |
| 3.691511805    | 1.415485537      | 0.861964461     | 4.682681545     | 0               |
| 2.369539299    | 2.730353577      | 0.871443201     | 3.564445425     | 0.876045555     |
| 2.374167821    | 1.631129038      | 2.049581511     | 6.774395168     | 1.629854182     |
| 3.409876001    | 2.778441263      | 0.189818957     | 2.336552964     | 0.168175019     |
| 3.591341988    | 2.241471272      | 2.570663745     | 2.577169447     | 0.047706837     |
| 2.01878452     | 2.993862199      | 2.491802365     | 3.900225212     | 3.268395797     |
| 3.583551028    | 1.431640318      | 3.372450605     | 2.095938759     | 0.111368655     |
| 3.632546761    | 2.153703889      | 2.152834276     | 6.353953156     | 2.74069656      |
| 2.880330024    | 2.276082539      | 2.606071068     | 3.11211818      | 0.05487404      |
| 2.488340424    | 2.655046286      | 2.097111454     | 3.265251205     | 1.181468714     |
| 3.298956134    | 3.188565653      | 1.963959682     | 3.588142677     | 2.442472163     |
| 2.189224872    | 4.693951172      | 1.637829415     | 0.736116789     | 0.73530135      |
| 3.058254917    | 3.478909453      | 0.100807624     | 3.669017116     | 0.090817173     |
| 3.550419888    | 3.549457574      | 1.65930954      | 2.081285148     | 1.060956275     |
| 1.166754699    | 3.55770971       | 2.21214559      | 3.043184778     | 2.533337248     |
| 2.711701728    | 3.300189206      | 2.709769301     | 2.446621009     | 3.122466788     |
| 3.573843915    | 1.400996933      | 0.850330493     | 2.110156426     | 3.105291723     |
| 3.359810812    | 4.208299092      | 2.033433642     | 2.03391094      | 4.205983981     |
| 3.925964126    | 3.589219548      | 1.440548916     | 3.610448917     | 0.114193927     |
| 3.099975719    | 2.747154632      | 0.18099336      | 3.115344053     | 0.160617619     |
| 4.882887328    | 3.486135546      | 3.478479232     | 3.510664543     | 0.135093891     |
| 2.873218302    | 4.190354221      | 1.480664676     | 3.567178695     | 2.207483298     |
| 4.08897889     | 4.400890782      | 3.85633297      | 4.301528216     | 3.284785664     |
| 2.816096562    | 1.379085033      | 2.469959849     | 2.482690437     | 2.784638548     |
| 3.57279766     | 3.468880032      | 1.799484286     | 2.365367025     | 2.118109734     |
| 2.846241545    | 3.458418691      | 0.206505307     | 0.234727153     | 0.182397768     |
| 3.637970787    | 2.761791993      | 1.337887472     | 4.071198211     | 0.08672506      |
| 0              | 3.499234777      | 2.926309583     | 1.651455097     | 0               |
| 3.46247508     | 1.361199979      | 1.362265441     | 4.962016775     | 1.659371335     |
| 3.008262928    | 2.20679994       | 3.498202253     | 2.216866792     | 0.13960758      |
| 2.142602396    | 3.743605415      | 1.109698359     | 2.143417008     | 0.027527083     |
| 3.2389778      | 2.833601708      | 2.265167357     | 2.260105029     | 0               |

|             |             |             |             |             |
|-------------|-------------|-------------|-------------|-------------|
| 3.504974446 | 3.498845879 | 0.105515392 | 2.811862065 | 2.440187165 |
| 0.632263132 | 3.389759768 | 2.586041988 | 4.48812488  | 1.795781285 |
| 4.560326184 | 1.614245827 | 1.024204291 | 2.61935077  | 1.023868948 |
| 3.551790885 | 3.550813251 | 3.549965212 | 3.795392888 | 3.67147693  |
| 3.00062402  | 2.237237484 | 4.849219576 | 4.89972748  | 1.631422872 |
| 4.750765306 | 4.00251264  | 0.08474052  | 0.093804037 | 2.962967088 |
| 4.284418061 | 2.841602124 | 2.35457261  | 2.031810587 | 4.788828835 |
| 4.454048888 | 2.416147119 | 0.629180687 | 6.288746183 | 1.4954725   |
| 4.048038698 | 3.596708099 | 3.190050011 | 2.773806585 | 3.616241995 |
| 2.809311148 | 3.586976908 | 2.586857714 | 1.001352996 | 0.000337764 |
| 3.27352902  | 4.022737595 | 0.153817762 | 4.193604417 | 0.137193465 |
| 3.177139507 | 3.661313534 | 3.662594563 | 4.095810105 | 0.905220069 |
| 3.166686907 | 2.354223352 | 0.199264206 | 1.673912589 | 1.643141268 |
| 2.96053287  | 0.861601442 | 3.114137856 | 3.368176632 | 0           |
| 3.358571489 | 2.710876322 | 1.912059921 | 1.503481674 | 0           |
| 3.525878093 | 1.754581439 | 1.141577331 | 6.817923867 | 0.035640868 |
| 3.021731784 | 2.196822599 | 3.384250613 | 1.7692474   | 2.18893935  |
| 0.239633378 | 3.756186134 | 0.22545209  | 4.333935248 | 4.05447067  |
| 4.03172007  | 2.065193343 | 2.322015397 | 1.75407033  | 2.330016569 |
| 3.612408071 | 3.794430212 | 1.355488954 | 0.815227339 | 0           |
| 4.085667073 | 1.121665129 | 4.983773045 | 2.980742651 | 2.968153001 |
| 3.059173847 | 3.557060313 | 5.519029756 | 1.581162244 | 0.15120397  |
| 3.036332742 | 1.831740392 | 0.662715725 | 5.247579414 | 0           |
| 2.832786051 | 2.562086709 | 2.229986248 | 3.585323216 | 0.045637611 |
| 2.647075168 | 2.189637109 | 2.185321262 | 0.170470623 | 1.503551784 |
| 3.431809179 | 1.56252582  | 0           | 5.292629222 | 4.617551439 |
| 4.450841066 | 0.751488929 | 2.788977046 | 5.361749301 | 0           |
| 3.690376622 | 3.425252457 | 0.019533682 | 4.431689926 | 3.419587047 |
| 1.963452654 | 2.572333604 | 4.029426014 | 4.431486906 | 0           |
| 2.511276105 | 2.296481619 | 0.801962547 | 4.717068328 | 0           |
| 3.098773811 | 2.482362183 | 3.51390755  | 3.338525291 | 0.099305685 |
| 4.115740753 | 1.149910267 | 1.522016723 | 5.22906966  | 0.654866407 |
| 3.757637759 | 2.646522948 | 3.444481943 | 2.678065363 | 0.252607341 |
| 2.587053423 | 1.586757714 | 1.001480916 | 3.324155253 | 1.586710725 |
| 2.932545282 | 1.766968426 | 0.231421926 | 3.584777731 | 2.410253283 |
| 2.284316521 | 2.733229134 | 5.919871844 | 5.012109421 | 2.24347489  |
| 3.710872464 | 2.981250283 | 2.146877804 | 3.502543922 | 2.151985207 |
| 2.877377452 | 3.879753761 | 2.65278594  | 2.389539913 | 2.061705539 |
| 3.325684066 | 1.214685123 | 0           | 3.894387147 | 0.704973907 |
| 3.09258714  | 1.935206609 | 0           | 5.939844558 | 0.577782652 |
| 3.236978322 | 2.3765413   | 2.120300576 | 1.805536891 | 0           |
| 2.705799508 | 1.928983619 | 0.082076853 | 4.122910615 | 0.074208188 |
| 4.124159894 | 3.540361224 | 2.543049452 | 1.548536207 | 0           |
| 1.671283826 | 3.272418355 | 0.019499902 | 4.695058147 | 0.017846062 |
| 2.648907156 | 1.845043073 | 1.846671904 | 3.766485679 | 1.179225232 |
| 2.900744762 | 3.052632649 | 0.823673084 | 3.526017475 | 0           |
| 2.983774545 | 1.571469142 | 0.988881301 | 3.790242896 | 0           |
| 3.898668087 | 2.916599309 | 0           | 1.947764854 | 4.769858698 |
| 3.36988693  | 3.045162833 | 3.4542543   | 5.471807402 | 3.334826423 |
| 3.570647169 | 1.800686146 | 1.97555355  | 5.455374475 | 1.995812513 |
| 2.864167296 | 3.643373677 | 2.639993195 | 5.869839233 | 0.009916137 |
| 0.5232827   | 3.419712946 | 0.522024563 | 2.517468041 | 0           |
| 2.820750849 | 2.631793936 | 1.840457475 | 1.838936189 | 0           |
| 3.000949232 | 1.447432612 | 1.447779915 | 6.747390235 | 0           |
| 2.447756846 | 2.894060518 | 1.516321111 | 3.005964051 | 1.823335489 |
| 3.659577029 | 2.065641254 | 2.389849103 | 5.570671124 | 1.049669342 |
| 3.441649332 | 3.11675544  | 0.02248457  | 2.107738624 | 0.020565535 |
| 1.719411044 | 2.02843536  | 2.029695141 | 2.996844451 | 0           |

|             |             |             |             |             |
|-------------|-------------|-------------|-------------|-------------|
| 4.382711274 | 2.515694161 | 1.812437954 | 2.53929476  | 0.217826332 |
| 1.639565102 | 2.952611776 | 3.813099189 | 1.951806385 | 0           |
| 3.162321891 | 3.288786666 | 1.743548216 | 3.158427636 | 2.891859185 |
| 3.476939177 | 1.442860998 | 1.869844482 | 4.79649861  | 0.427524529 |
| 1.701824351 | 2.125369916 | 2.124681589 | 3.465126013 | 0.024268662 |
| 4.280405378 | 1.336114861 | 1.97833356  | 6.140590395 | 2.40189692  |
| 2.713505107 | 3.18859597  | 1.773862323 | 2.220084251 | 2.739423531 |
| 1.655962619 | 2.874077506 | 1.432732992 | 2.765597746 | 0           |
| 3.351601266 | 1.020144441 | 2.835734164 | 3.352086387 | 2.025397852 |
| 3.413322949 | 2.219307946 | 1.170945032 | 7.132115508 | 1.167860302 |
| 4.65079647  | 0.06468997  | 1.226525398 | 4.862512845 | 1.222059445 |
| 2.176621125 | 2.504336984 | 1.136280875 | 2.775562251 | 4.272962658 |
| 3.212747102 | 1.296763718 | 3.57341487  | 4.238787102 | 0.075653196 |
| 2.852705049 | 3.368138506 | 3.50546115  | 3.632979462 | 3.043247815 |
| 3.595762159 | 3.303277    | 2.120170294 | 1.69765088  | 2.442204463 |
| 1.895135393 | 1.893587983 | 1.892007159 | 3.171467989 | 1.254592224 |
| 5.157708725 | 2.837607452 | 1.580585221 | 5.580871311 | 0           |
| 1.769297677 | 3.020114852 | 1.153381572 | 1.769596963 | 1.762638358 |
| 3.633607177 | 2.241761674 | 0           | 2.580087422 | 0           |
| 2.807120203 | 3.560291631 | 0           | 3.169477467 | 3.0884974   |
| 1.850577389 | 2.885085804 | 3.476774437 | 4.417365715 | 2.271042543 |
| 3.342278424 | 2.821193315 | 1.456662292 | 2.1929033   | 0           |
| 3.654790999 | 2.502332961 | 1.134753389 | 3.519933844 | 1.132465118 |
| 3.200227453 | 4.204606054 | 3.785633137 | 5.889140867 | 2.993325827 |
| 1.503321137 | 2.168027816 | 1.49948823  | 2.632573272 | 2.140943238 |
| 4.008779148 | 2.088962922 | 1.667181393 | 3.270852782 | 0.017110099 |
| 2.722580714 | 1.922929213 | 2.502813216 | 3.610157478 | 0           |
| 2.465788496 | 2.469384176 | 3.963583652 | 3.069425519 | 1.04401117  |
| 3.465384341 | 2.813056759 | 0.001081247 | 0.001175695 | 3.327484036 |
| 0.295901023 | 0.285330666 | 2.594802632 | 0.319804277 | 0.241554091 |
| 4.298740058 | 3.989985865 | 1.626044217 | 2.323774481 | 2.720167487 |
| 3.189127412 | 2.7852559   | 1.662090628 | 6.177308022 | 2.229806605 |
| 2.662550246 | 3.540209563 | 4.939811943 | 3.542547497 | 0.01383715  |
| 0.11573429  | 1.385369952 | 1.38409629  | 1.385278423 | 0.099025882 |
| 2.658111201 | 2.661240196 | 1.180943283 | 2.800279593 | 3.305758378 |
| 3.264979135 | 3.264051672 | 0.017870661 | 3.419293426 | 1.064507701 |
| 2.257168393 | 1.823274175 | 3.447197308 | 2.592005192 | 0.050599834 |
| 3.316194743 | 3.656194864 | 3.502470223 | 3.211684572 | 2.062583903 |
| 3.220237396 | 2.768489724 | 2.580375439 | 4.391868225 | 0           |
| 3.744767515 | 2.460272973 | 1.524508905 | 5.856907866 | 0           |
| 2.75547126  | 3.074702553 | 0           | 3.205119704 | 1.389047553 |
| 0.339346484 | 4.251862503 | 0.316443552 | 0.368592469 | 0.274029664 |
| 2.660918839 | 3.654854294 | 0.900060892 | 2.181569385 | 2.859214013 |
| 2.73171831  | 3.597105158 | 3.885775362 | 2.399183054 | 0.079574937 |
| 1.938952457 | 2.932848747 | 2.741496575 | 4.175576189 | 1.530234142 |
| 2.181185432 | 2.673402812 | 0           | 4.003680869 | 1.746883004 |
| 3.181205016 | 1.272661247 | 5.55245829  | 3.384948847 | 0.069356288 |
| 4.33960926  | 2.299805453 | 4.331144076 | 5.524149202 | 2.885853496 |
| 3.141002192 | 2.786736375 | 2.778997324 | 3.873411522 | 2.739333052 |
| 4.492137251 | 1.995651807 | 1.348202635 | 3.05954162  | 0.089461944 |
| 4.699458915 | 2.0586848   | 5.228701053 | 5.083778402 | 0.815061041 |
| 3.136367116 | 2.770732256 | 1.50908828  | 5.405763567 | 2.13693519  |
| 3.510656633 | 3.307246841 | 2.801478759 | 0.118835738 | 0.096144173 |
| 3.182018183 | 3.447888534 | 5.408417699 | 3.481226624 | 0.179865199 |
| 4.202710959 | 0.104509007 | 4.579488305 | 3.302669982 | 0.092066102 |
| 1.345960868 | 1.345181083 | 1.344132923 | 1.344810189 | 1.97473561  |
| 4.097282713 | 1.960797422 | 1.253627976 | 6.95102328  | 1.542151525 |
| 2.070641288 | 1.412395451 | 0.118301704 | 2.523692738 | 2.487303081 |



| hsa-miR-196b-5p | hsa-miR-30d-5p | hsa-miR-500b-5p | hsa-miR-500a-5p | hsa-miR-3677-3p |
|-----------------|----------------|-----------------|-----------------|-----------------|
| 4.408894925     | 15.37702057    | 4.297911273     | 4.297909396     | 3.147488983     |
| 5.923941105     | 14.86150209    | 3.846879901     | 3.846879825     | 2.844682349     |
| 10.71616882     | 15.24772951    | 4.274487382     | 4.274489394     | 4.278999985     |
| 4.577354436     | 15.76860109    | 5.228304962     | 5.228305719     | 4.940989311     |
| 6.914360394     | 16.78924122    | 3.897001816     | 3.897001634     | 5.261375197     |
| 5.320119276     | 15.84483878    | 4.356311275     | 4.356310759     | 1.12216865      |
| 7.18416056      | 16.17864351    | 3.58785166      | 3.587849353     | 4.352843629     |
| 11.62904714     | 19.07348537    | 4.130161252     | 4.13016261      | 3.411298337     |
| 3.206471273     | 17.18974232    | 4.510864144     | 4.510865101     | 5.188021717     |
| 9.214527084     | 14.55703423    | 4.630731289     | 4.630732426     | 5.789483693     |
| 4.604378627     | 14.87176614    | 4.852345504     | 4.852343118     | 3.146677576     |
| 6.859974073     | 15.29349453    | 4.982111835     | 4.98210975      | 2.793594386     |
| 5.089563794     | 17.61380869    | 4.313472973     | 4.313473166     | 3.383335997     |
| 10.71689064     | 16.11455038    | 4.06923846      | 4.069237526     | 5.181787204     |
| 6.423725577     | 17.10974886    | 4.856066369     | 4.856066527     | 3.950402346     |
| 12.22906423     | 16.38327695    | 1.927285092     | 1.927285676     | 4.882970723     |
| 8.774681512     | 15.47127353    | 5.48783209      | 5.487833719     | 4.199049531     |
| 3.66162212      | 16.01008787    | 5.350518553     | 5.350519689     | 4.05093209      |
| 9.34267068      | 16.52979463    | 4.841824654     | 4.841821942     | 4.360035586     |
| 8.700911564     | 15.96476121    | 3.750013007     | 3.750013105     | 2.753305761     |
| 7.431388489     | 17.1216727     | 5.111999933     | 5.111989201     | 0.479923851     |
| 5.194251718     | 15.17881772    | 4.047746065     | 4.047744461     | 2.867660002     |
| 11.34443655     | 15.49354197    | 5.920489509     | 5.920490235     | 3.521023264     |
| 7.100181201     | 15.64122006    | 4.532217275     | 4.532213473     | 4.253895169     |
| 2.385627793     | 16.38046224    | 4.29995189      | 4.299952408     | 2.958637844     |
| 9.298658459     | 15.46792626    | 4.810413577     | 4.810415887     | 4.574717908     |
| 6.537034519     | 16.50360124    | 6.452853608     | 6.452853332     | 3.758385755     |
| 5.560235931     | 15.82192903    | 4.202308797     | 4.202305844     | 4.583583342     |
| 5.717872547     | 16.42303384    | 5.417236822     | 5.417235636     | 1.811652181     |
| 4.551765041     | 15.72897073    | 6.116823259     | 6.116824613     | 3.563278121     |
| 5.925171011     | 14.11758277    | 4.425566084     | 4.425564004     | 4.616293181     |
| 9.69101449      | 16.78253819    | 4.503848562     | 4.503848025     | 2.484299443     |
| 8.599441474     | 15.87399803    | 4.911446748     | 4.911445564     | 0.066298638     |
| 10.1277751      | 15.51409204    | 5.239282734     | 5.239284401     | 2.091134867     |
| 5.063439768     | 13.83135649    | 5.245607685     | 5.245609        | 3.756168429     |
| 5.158225772     | 13.68920739    | 4.795916303     | 4.795917503     | 5.717409037     |
| 3.967015039     | 16.09086337    | 4.421489942     | 4.421488282     | 1.354374156     |
| 4.417807946     | 14.52901883    | 5.050808451     | 5.050808114     | 3.261158458     |
| 7.66205877      | 16.84487071    | 4.249997417     | 4.156228151     | 2.547424882     |
| 10.15959017     | 15.65112419    | 4.138797909     | 4.138797573     | 1.695055653     |
| 7.114632342     | 15.73700391    | 4.5106245       | 4.510625122     | 2.583965196     |
| 3.84676822      | 15.13863708    | 4.287868689     | 4.287868588     | 3.498155063     |
| 5.170507313     | 16.01616694    | 4.63540463      | 4.635402282     | 2.902682302     |
| 3.394294919     | 15.96211407    | 7.180800769     | 7.180795001     | 2.766561703     |
| 6.436248998     | 14.96803604    | 4.827687278     | 4.827684225     | 5.058347476     |
| 2.681913104     | 15.8943475     | 4.185578144     | 4.111836486     | 4.112504111     |
| 13.20110143     | 15.7877832     | 4.738783186     | 4.738777742     | 1.860633237     |
| 4.641101194     | 16.40653978    | 4.354336545     | 4.354334813     | 4.124743739     |
| 3.568812867     | 16.19261562    | 4.840825418     | 4.840826131     | 4.709485934     |
| 4.11198421      | 15.75051691    | 2.862585624     | 2.862585189     | 1.696991519     |
| 3.043879388     | 17.14312382    | 4.958349542     | 4.958347584     | 4.187615028     |
| 6.174205849     | 14.68803672    | 3.897688909     | 3.897689625     | 2.916664627     |
| 10.22489777     | 17.6415622     | 3.59133954      | 3.591340448     | 3.122522196     |
| 3.532299603     | 14.77507995    | 5.94222822      | 5.942224004     | 2.674233943     |
| 6.582856657     | 15.11861433    | 3.749210664     | 3.749210358     | 4.16565061      |
| 6.000758682     | 14.79210235    | 7.611007713     | 7.611009343     | 3.348195691     |

|             |             |             |             |             |
|-------------|-------------|-------------|-------------|-------------|
| 6.140170256 | 15.98848726 | 4.443038174 | 4.443036413 | 5.23956786  |
| 10.65154278 | 15.86679687 | 3.825202701 | 3.825203643 | 4.816446391 |
| 4.896229883 | 15.78594555 | 3.844469947 | 3.844469876 | 4.561152857 |
| 4.905792711 | 15.63179479 | 4.798156279 | 4.798155965 | 3.902534107 |
| 4.783264474 | 15.54823035 | 5.385906893 | 5.385909286 | 4.819022085 |
| 4.246836893 | 16.12298494 | 5.030671039 | 5.030669286 | 3.890270719 |
| 4.037253863 | 16.7310738  | 3.737281034 | 3.737280969 | 5.73834525  |
| 7.361966331 | 14.07118517 | 5.276720219 | 5.276722104 | 3.886117484 |
| 4.701958393 | 15.40901577 | 5.501596898 | 5.501598305 | 2.921989349 |
| 5.932929278 | 14.45252832 | 5.809523575 | 5.809523566 | 2.001799449 |
| 1.516188596 | 16.17454188 | 2.206144688 | 2.206145415 | 3.286963758 |
| 5.23562197  | 15.82058722 | 4.974085217 | 4.974085701 | 4.306789977 |
| 5.598809693 | 15.40241905 | 5.752083778 | 5.752078455 | 2.834068241 |
| 4.025150906 | 17.64378486 | 4.299428336 | 4.299428856 | 4.98424092  |
| 4.142079396 | 15.73118434 | 4.84702961  | 4.847029936 | 4.537853543 |
| 11.67321451 | 16.57967528 | 5.773382741 | 5.773381794 | 4.212537034 |
| 11.34504191 | 15.93664929 | 4.554414829 | 4.554414115 | 2.798476214 |
| 3.278776752 | 15.28607826 | 5.363492159 | 5.363486543 | 4.331785963 |
| 3.706596061 | 17.10597111 | 5.090052927 | 5.090053856 | 3.173333269 |
| 5.046085095 | 15.72910293 | 4.646103461 | 4.646104273 | 2.71525088  |
| 8.656295144 | 15.02071449 | 4.830478548 | 4.830477922 | 6.802079217 |
| 3.789060144 | 15.53964109 | 3.074847114 | 3.074846389 | 4.714831542 |
| 7.233969765 | 16.84778297 | 4.873581258 | 4.873582787 | 3.601723463 |
| 9.190436874 | 16.3941336  | 4.859172946 | 4.859171987 | 4.795498407 |
| 4.548184428 | 17.14055926 | 3.514701371 | 3.514700049 | 3.278782109 |
| 3.142355033 | 16.30062187 | 4.924856253 | 4.924856347 | 2.972666185 |
| 6.971670785 | 15.7823388  | 5.436030851 | 5.436032216 | 4.753299168 |
| 9.137057949 | 15.39088295 | 4.197098391 | 4.197098119 | 4.279163093 |
| 10.33472708 | 15.4579171  | 4.323144696 | 4.323146462 | 4.941753825 |
| 3.489729038 | 16.75344616 | 4.715645438 | 4.715646321 | 2.696764786 |
| 7.61639864  | 17.25575213 | 5.522308948 | 5.522306296 | 3.866513627 |
| 9.828469779 | 15.7729106  | 5.601274002 | 5.601275925 | 2.759180089 |
| 5.6934494   | 15.79553341 | 3.514829674 | 3.514826874 | 3.507723403 |
| 5.002357073 | 16.21226789 | 4.089764236 | 4.08976423  | 2.809507342 |
| 7.773008643 | 16.64087742 | 4.634224981 | 4.634220413 | 3.301485944 |
| 5.320245294 | 14.99649626 | 6.503548808 | 6.503543554 | 2.291051028 |
| 3.608431778 | 15.26715596 | 4.839008118 | 4.83900872  | 2.144273935 |
| 6.521587553 | 14.82424315 | 4.32388146  | 4.323881262 | 3.881989575 |
| 6.995640749 | 15.41536679 | 4.740000608 | 4.740001905 | 5.107727205 |
| 3.898029785 | 15.32395635 | 4.108405825 | 4.10840713  | 4.4584526   |
| 4.970820227 | 16.14262843 | 4.014845842 | 4.014846299 | 3.769606459 |
| 4.125507996 | 14.89007288 | 4.678346408 | 4.678344912 | 3.877867621 |
| 4.810174209 | 15.8505099  | 3.6542616   | 3.654261673 | 1.960301643 |
| 9.752970018 | 14.87454568 | 3.692573057 | 3.69257287  | 4.501871218 |
| 9.949504964 | 15.90656512 | 4.434265076 | 4.434266323 | 4.683008256 |
| 8.329985632 | 15.84221527 | 4.61643919  | 4.616439951 | 3.962854451 |
| 7.441330194 | 15.6231377  | 5.408546219 | 5.408546284 | 4.374960518 |
| 4.514950965 | 15.08335614 | 3.48116977  | 3.481170257 | 4.091356007 |
| 10.288961   | 14.4354815  | 6.291558281 | 6.291561277 | 4.641323203 |
| 10.07785295 | 15.73770362 | 4.159693984 | 4.159695815 | 4.536287384 |
| 5.017006025 | 16.16558028 | 4.309563787 | 4.309563628 | 6.570271733 |
| 6.007713233 | 14.01582036 | 5.007674361 | 5.007676537 | 4.266596297 |
| 8.046939298 | 14.69241137 | 4.199076064 | 4.199076493 | 2.818871412 |
| 2.999535083 | 13.8333382  | 3.630324607 | 3.630324867 | 5.210425211 |
| 5.381170375 | 15.37039889 | 3.408718506 | 3.408719087 | 4.563495174 |
| 8.815874004 | 14.66259346 | 5.401121655 | 5.401121354 | 2.391264699 |
| 6.300377266 | 15.68799463 | 4.213199434 | 4.213199118 | 4.447599121 |
| 3.750472373 | 17.11046028 | 5.296769024 | 5.296770137 | 4.12012256  |

|             |             |             |             |             |
|-------------|-------------|-------------|-------------|-------------|
| 7.575677272 | 15.32064859 | 5.521978354 | 5.521971823 | 2.538804696 |
| 10.05015012 | 14.68665063 | 4.734004591 | 4.73400726  | 5.45774282  |
| 6.865334747 | 14.79396257 | 4.727867517 | 4.727868375 | 2.519969876 |
| 7.053832202 | 15.47513318 | 5.154383332 | 5.154385988 | 4.589881034 |
| 5.399793762 | 16.89552875 | 4.541124946 | 4.541124505 | 4.469582901 |
| 8.589031411 | 15.18995273 | 5.821621257 | 5.821618841 | 4.882802326 |
| 4.921259727 | 14.50879972 | 5.359051695 | 5.359053643 | 3.996005365 |
| 6.152801577 | 13.9412007  | 5.348460508 | 5.348463337 | 2.440919028 |
| 4.490973199 | 14.42881413 | 6.353931132 | 6.353930989 | 4.279037572 |
| 4.784737021 | 18.51869127 | 5.30599306  | 5.305992022 | 4.717061155 |
| 10.7061127  | 14.93024704 | 4.799964826 | 4.79996363  | 4.335035362 |
| 4.377430614 | 14.90748689 | 4.455183963 | 4.455183359 | 3.196535752 |
| 9.01385376  | 15.62213302 | 4.963883441 | 4.963881747 | 3.885438618 |
| 7.279956892 | 15.2296284  | 4.508871023 | 4.508870884 | 4.218767855 |
| 3.459934841 | 15.49345829 | 5.002548775 | 5.00254827  | 3.598188113 |
| 5.348912656 | 15.44531748 | 5.677846671 | 5.677844896 | 3.835689598 |
| 7.800126096 | 15.34998693 | 4.179391632 | 4.179392654 | 4.833719258 |
| 4.626616218 | 15.84944905 | 3.929409609 | 3.929409107 | 4.478967081 |
| 3.624029148 | 16.57908917 | 2.857247131 | 2.857247263 | 5.698520609 |
| 6.278173191 | 18.63591815 | 3.846256741 | 3.846257591 | 3.169809611 |
| 4.981177687 | 15.9082886  | 4.330805129 | 4.330804176 | 4.32869605  |
| 5.160043236 | 15.79525064 | 4.399846594 | 4.399848026 | 6.164734662 |
| 5.495361977 | 16.25460385 | 4.203721797 | 4.203721273 | 0.040578868 |
| 1.751884032 | 15.99638933 | 5.610108278 | 5.610107365 | 4.460916714 |
| 2.626191647 | 15.91429361 | 3.865914736 | 3.865912977 | 3.486690388 |
| 5.631900797 | 15.03780917 | 5.151272672 | 5.151272287 | 2.089891497 |
| 5.115112073 | 15.95752996 | 3.716444235 | 3.716444385 | 6.491257051 |
| 9.759891829 | 15.15632948 | 6.427237377 | 6.427240069 | 4.321597956 |
| 5.529974749 | 16.02293632 | 4.176152976 | 4.176152962 | 3.005895365 |
| 3.751796107 | 15.22455204 | 5.132417866 | 5.132411158 | 3.461976065 |
| 4.889267602 | 15.45437145 | 4.882508669 | 4.882504751 | 1.63308369  |
| 6.079012872 | 14.70886485 | 4.667505828 | 4.667506902 | 6.654629163 |
| 6.428430828 | 15.40516482 | 4.993521658 | 4.993521362 | 4.333036567 |
| 3.868083782 | 16.69649472 | 4.809135782 | 4.809133635 | 4.250528136 |
| 4.761393577 | 16.31678369 | 4.572487194 | 4.572488503 | 2.933552653 |
| 7.770297773 | 15.52392739 | 5.803300652 | 5.803300222 | 3.095513736 |
| 6.753821517 | 14.78464619 | 2.592126138 | 2.592126192 | 5.346037148 |
| 4.507671662 | 16.05906448 | 5.523265218 | 5.523267154 | 3.485465128 |
| 8.551785788 | 17.2305929  | 4.390868    | 4.390868607 | 4.392208921 |
| 8.959511533 | 15.90592578 | 4.160679042 | 4.160680166 | 3.995434171 |
| 4.540290156 | 14.64772966 | 3.825868327 | 3.825868769 | 3.908769311 |
| 3.236903039 | 15.35908499 | 7.613237608 | 7.613226235 | 2.031424645 |
| 5.006862701 | 14.67921627 | 3.749166056 | 3.749166317 | 4.300047313 |
| 5.050193597 | 17.48579981 | 5.162976278 | 5.162974376 | 3.239483409 |
| 9.633258344 | 15.70352453 | 4.627107982 | 4.62710819  | 5.284126459 |
| 4.648011933 | 16.6934705  | 3.22645798  | 3.226458466 | 4.386403463 |
| 4.4032913   | 16.47525653 | 4.57345133  | 4.573449998 | 3.712645257 |
| 8.348781042 | 14.18062643 | 6.139397598 | 6.139395864 | 4.742732132 |
| 5.314162655 | 16.28412982 | 5.158244669 | 5.15824024  | 4.20491719  |
| 5.378869541 | 13.85435252 | 5.803392904 | 5.803390392 | 3.956863876 |
| 9.416893045 | 15.08373356 | 6.698548052 | 6.698549346 | 3.699879145 |
| 9.07522655  | 15.90681377 | 5.259914835 | 5.259917421 | 5.087158202 |
| 3.853414588 | 17.31576584 | 3.523187079 | 3.523186169 | 2.476897565 |
| 10.94940764 | 15.87538027 | 4.527034641 | 4.527030876 | 4.091857781 |
| 2.794304248 | 14.97667222 | 6.233420631 | 6.233417844 | 5.655267635 |
| 5.035512489 | 15.26721068 | 3.813872478 | 3.813871379 | 3.481939465 |
| 9.46188943  | 14.94576832 | 6.196428863 | 6.196431942 | 2.427801675 |
| 4.174447155 | 17.34110777 | 5.124396103 | 5.12439353  | 2.865159691 |

| hsa-miR-671-5p | hsa-miR-4652-5p | hsa-miR-4661-5p | hsa-miR-421 | hsa-miR-217-5p |
|----------------|-----------------|-----------------|-------------|----------------|
| 3.146742254    | 0.132827203     | 3.912357407     | 3.57619157  | 9.991450919    |
| 3.846636172    | 0.007573233     | 3.946603489     | 2.034000845 | 12.75047109    |
| 3.397009009    | 0               | 3.392908686     | 3.96542092  | 10.23214621    |
| 4.771969125    | 1.41225585      | 5.495697851     | 4.23349968  | 13.52561686    |
| 4.791213084    | 1.05864793      | 4.792244765     | 6.068811408 | 13.44930653    |
| 4.184147476    | 0.036714602     | 4.509339822     | 3.348368663 | 8.798059151    |
| 3.298632096    | 0.261925604     | 6.860472012     | 4.015415976 | 6.257837717    |
| 3.694670736    | 0               | 4.264565822     | 2.847075716 | 7.152379095    |
| 3.523041177    | 1.677881906     | 1.983203036     | 3.083275328 | 15.59053683    |
| 3.801844151    | 5.496784799     | 6.060114976     | 5.099253399 | 6.509899025    |
| 3.905924802    | 0.132608839     | 2.872174394     | 0.131922697 | 9.429221675    |
| 4.512973854    | 0.111793058     | 4.323844423     | 3.06709855  | 10.04164563    |
| 3.829572822    | 0               | 3.829026008     | 4.00978857  | 6.204120107    |
| 4.831312363    | 7.184217353     | 3.530888248     | 5.073112347 | 10.72844647    |
| 3.273698654    | 0.968227208     | 7.518176264     | 3.122116973 | 4.341921161    |
| 3.40412842     | 0.089039316     | 4.595487219     | 3.871789298 | 10.14656968    |
| 3.752620943    | 4.403983512     | 5.5525218       | 3.215139745 | 8.192277966    |
| 4.56277991     | 5.176746353     | 8.79114172      | 4.784418894 | 5.454989443    |
| 3.972289418    | 0.150267716     | 3.446630152     | 1.469108416 | 6.116165751    |
| 3.266065109    | 0               | 3.528089299     | 3.528442668 | 12.87881689    |
| 3.880280417    | 0.47809291      | 4.1920916       | 3.038117857 | 5.950168951    |
| 5.643567712    | 2.867436316     | 1.412029142     | 3.571951213 | 6.596300967    |
| 4.516518257    | 0               | 3.626373124     | 2.637498284 | 4.208191829    |
| 3.918418929    | 0.230915053     | 5.358434881     | 2.853063253 | 9.594280958    |
| 2.383826658    | 0               | 4.099080594     | 3.949753238 | 7.943022314    |
| 2.718449949    | 0               | 3.083719413     | 3.165571132 | 7.323861971    |
| 3.758295348    | 0.011251037     | 6.943455243     | 5.344900557 | 8.027401206    |
| 2.798477505    | 0.213309707     | 5.552830638     | 3.146351309 | 7.288218648    |
| 5.238535646    | 1.188501557     | 3.443639457     | 4.280002355 | 8.548287396    |
| 4.555486359    | 4.456117317     | 3.244961112     | 3.122991573 | 15.29723012    |
| 2.09591337     | 3.595456256     | 4.87399707      | 3.395500176 | 14.5418181     |
| 4.179118965    | 0.035663364     | 2.977647442     | 5.467653785 | 16.51008386    |
| 3.63487266     | 0.066163499     | 3.637134425     | 3.111385195 | 10.92396579    |
| 4.300441059    | 0               | 3.361182024     | 3.161988968 | 12.10240771    |
| 4.106648337    | 0               | 3.056776149     | 2.610660209 | 10.02674227    |
| 3.730420643    | 5.851441605     | 4.717579612     | 4.799610114 | 13.8563889     |
| 3.06523697     | 0.111253077     | 4.213020639     | 2.451715505 | 4.422329726    |
| 4.795834035    | 3.413844157     | 3.261482086     | 2.67228122  | 15.14097074    |
| 3.042759555    | 6.59359345      | 5.009310372     | 3.829801496 | 8.456387796    |
| 3.303403689    | 2.71305377      | 6.391072962     | 2.712964102 | 13.44426085    |
| 3.570553551    | 2.366390366     | 4.754283789     | 2.940532252 | 7.166196123    |
| 3.62383552     | 1.025616436     | 5.084993152     | 2.844546488 | 15.10940164    |
| 3.783306779    | 4.535363856     | 5.102190389     | 2.559431777 | 16.30054969    |
| 4.939593519    | 0.203025196     | 3.117698218     | 3.392087182 | 17.21156169    |
| 3.508496994    | 4.637328045     | 8.485555304     | 6.412296321 | 9.748977786    |
| 3.67387528     | 0               | 6.088932909     | 4.256776276 | 16.63801767    |
| 3.91701289     | 0.295874955     | 4.612925943     | 4.117854237 | 4.130409656    |
| 2.822493586    | 3.526532185     | 2.033606464     | 3.699945296 | 8.188134222    |
| 3.463564133    | 6.981613755     | 5.532395675     | 4.080543619 | 15.13276615    |
| 3.489420661    | 0.232855912     | 2.862654556     | 0.231429454 | 5.504180417    |
| 4.186558282    | 0.106047393     | 3.946395139     | 2.771200895 | 7.613151252    |
| 3.287376463    | 0               | 3.050031091     | 3.582257361 | 7.716843893    |
| 3.594494683    | 0               | 4.70203404      | 3.594804318 | 11.67329485    |
| 5.281210099    | 0.174797842     | 4.56679406      | 1.538749112 | 9.07474186     |
| 4.07182055     | 0.032795884     | 5.25783316      | 3.621787493 | 6.599639024    |
| 4.680431416    | 0               | 1.702856768     | 2.662415442 | 17.69887367    |

|             |             |             |             |             |
|-------------|-------------|-------------|-------------|-------------|
| 2.811091638 | 4.621255617 | 5.189115105 | 2.810915416 | 12.86876848 |
| 2.853256425 | 0           | 4.443476556 | 4.27008026  | 7.4833063   |
| 4.359304403 | 0.007106974 | 4.49728324  | 4.037073574 | 14.63132069 |
| 3.262425532 | 4.620264782 | 6.421254857 | 3.415113288 | 16.9137155  |
| 4.792080271 | 0           | 4.193667813 | 4.110807291 | 7.090559786 |
| 1.942882779 | 5.14258044  | 5.620022348 | 2.721718291 | 5.97822798  |
| 4.792400176 | 8.151714183 | 4.94491046  | 6.2077583   | 15.04975371 |
| 4.876761832 | 1.485325468 | 4.057070138 | 3.616356476 | 10.00618268 |
| 5.356388552 | 4.104841506 | 4.618527787 | 3.056736394 | 15.98453497 |
| 4.089563387 | 0.000397698 | 2.809335801 | 2.809330962 | 10.89172233 |
| 2.206424769 | 0.171588341 | 4.555048131 | 3.717659516 | 5.220326788 |
| 4.704620071 | 0           | 2.187670945 | 3.024697807 | 9.189174285 |
| 4.617809205 | 0.224357399 | 4.84255516  | 2.369083641 | 8.32186216  |
| 3.9491155   | 3.687635164 | 7.018162368 | 2.958383658 | 13.82232412 |
| 2.709260668 | 5.384941111 | 3.703009876 | 4.479340705 | 13.33421103 |
| 5.169573908 | 0.042613126 | 6.42967933  | 5.463617371 | 8.624757566 |
| 4.754744749 | 0.046190482 | 3.929313353 | 2.199253033 | 15.09542454 |
| 1.756260629 | 6.078496164 | 3.285033997 | 2.459664719 | 7.283972517 |
| 5.092625111 | 0           | 7.421858896 | 2.317632129 | 15.89986714 |
| 3.509836224 | 4.08928828  | 4.691116349 | 3.290327254 | 13.06847343 |
| 4.82871824  | 5.612736271 | 4.184374749 | 4.270375205 | 8.247972985 |
| 3.783369955 | 0.190311986 | 1.577944173 | 2.265294745 | 16.84793    |
| 2.909272681 | 0           | 4.545112675 | 4.231226596 | 14.55854794 |
| 2.566284543 | 6.48419354  | 5.133993411 | 3.258236101 | 13.06215028 |
| 4.182133105 | 0.169246545 | 6.757875711 | 4.309679763 | 7.276840243 |
| 4.430561871 | 0           | 5.725241032 | 5.643210363 | 6.656478454 |
| 3.186060585 | 0.753464364 | 3.75955452  | 4.173106413 | 7.699275172 |
| 4.50182816  | 5.754932635 | 5.19937052  | 3.807990991 | 15.51508046 |
| 4.214624342 | 0.484158998 | 1.764960047 | 4.364908632 | 13.39058131 |
| 4.375853145 | 0           | 4.839958034 | 4.532783303 | 7.327854214 |
| 4.133400901 | 0.122111735 | 4.01109044  | 3.336864056 | 13.85005836 |
| 5.888231922 | 0           | 4.102977056 | 4.051463165 | 10.49296915 |
| 4.226635383 | 0.33313724  | 4.973419081 | 3.504176043 | 5.825475276 |
| 4.956516458 | 0.000432764 | 3.002188249 | 2.001958097 | 13.71289823 |
| 5.133235366 | 0.262292571 | 5.461865784 | 3.815099825 | 12.54143668 |
| 4.74089201  | 4.53218268  | 3.383269288 | 3.377045425 | 14.44315728 |
| 4.190740037 | 2.144277693 | 4.255870408 | 3.503060333 | 15.46810953 |
| 1.644525238 | 4.934181342 | 4.398153202 | 1.644532372 | 15.39225692 |
| 2.535797878 | 4.886759048 | 5.418183887 | 4.744013183 | 7.550690613 |
| 2.6203425   | 0           | 3.952783637 | 4.57140152  | 7.477613125 |
| 3.472809342 | 0           | 4.158018764 | 3.358541391 | 8.875185887 |
| 2.710182854 | 4.512953536 | 4.334759648 | 4.229209564 | 15.01571322 |
| 2.54213704  | 0           | 7.411033385 | 5.733895466 | 5.784466117 |
| 2.685597402 | 1.071175122 | 3.916021633 | 2.419820849 | 8.243684402 |
| 3.767707684 | 6.185175227 | 6.412432366 | 4.085610009 | 7.010931348 |
| 3.963284545 | 0           | 3.961266554 | 3.886019887 | 12.64265508 |
| 3.305201327 | 4.506176692 | 5.408499728 | 5.111797084 | 13.28759769 |
| 3.819279852 | 5.443391814 | 2.19835493  | 3.16695795  | 15.77242027 |
| 3.285288747 | 7.243407611 | 3.1189691   | 5.129194731 | 4.958762511 |
| 4.591651682 | 0           | 3.046365292 | 4.718518036 | 10.95255272 |
| 3.381235395 | 1.039651669 | 4.454272574 | 5.616650528 | 4.383740253 |
| 3.249030159 | 0           | 2.218253561 | 4.184536861 | 6.442194804 |
| 4.450990029 | 0           | 3.27256536  | 3.512471484 | 12.24348499 |
| 3.730145309 | 3.410241723 | 4.625239631 | 4.405368133 | 8.526623762 |
| 3.496501239 | 5.476550732 | 4.346050589 | 3.654142433 | 9.351180358 |
| 5.400303989 | 0.014881681 | 3.777141466 | 4.076796365 | 10.12430652 |
| 4.212251289 | 2.925245164 | 3.444173728 | 4.517797995 | 8.056162258 |
| 3.573343766 | 0           | 4.901562283 | 3.911042009 | 11.51765623 |

|             |             |             |             |             |
|-------------|-------------|-------------|-------------|-------------|
| 4.413450892 | 0.282655107 | 3.890164406 | 3.876799872 | 8.134250324 |
| 3.56565088  | 2.321969918 | 3.069853579 | 4.803004497 | 9.237412175 |
| 3.779324571 | 7.687860216 | 4.491503936 | 3.39664842  | 16.25038203 |
| 3.046790092 | 1.862964232 | 4.664963551 | 5.199599526 | 7.739174622 |
| 4.395062419 | 5.85007766  | 5.643214892 | 3.464711004 | 11.53305456 |
| 3.798141366 | 3.938670631 | 5.357197607 | 4.65696562  | 4.396981022 |
| 3.450549973 | 4.73698277  | 4.47157444  | 4.836906961 | 15.46230472 |
| 2.557860771 | 0           | 4.035045382 | 3.324727554 | 5.675256731 |
| 4.616206839 | 1.60939572  | 3.615604086 | 3.489705314 | 13.32499774 |
| 4.425640002 | 0.051773951 | 4.257292352 | 4.503834189 | 9.364466515 |
| 4.422422145 | 6.699218866 | 6.822812748 | 3.494589265 | 5.299477372 |
| 3.368132138 | 5.936821497 | 3.001823267 | 3.001074162 | 16.3731683  |
| 3.590046588 | 0.092056389 | 2.991508526 | 4.602797246 | 10.19080911 |
| 3.632857359 | 3.955359368 | 4.693569957 | 3.507054916 | 13.66402717 |
| 3.840249229 | 0.02779415  | 5.145198271 | 2.449486556 | 14.57634333 |
| 4.776639841 | 0.080248153 | 4.710560994 | 2.942173032 | 9.820824531 |
| 4.523490504 | 0           | 5.423248921 | 5.000209635 | 10.67443448 |
| 4.478468851 | 5.878080498 | 3.221404054 | 4.754983591 | 14.22613015 |
| 4.686540293 | 0           | 3.19333938  | 4.454355006 | 6.266391806 |
| 3.1702757   | 6.396637966 | 6.164614652 | 4.53716852  | 16.3520419  |
| 2.287203755 | 0.067993882 | 6.039944255 | 4.498839342 | 3.643497174 |
| 3.965992486 | 4.983751638 | 5.694034144 | 5.631754168 | 7.6187531   |
| 3.658113019 | 1.134512399 | 3.786127217 | 3.365863512 | 9.308939567 |
| 4.67275571  | 0.042457798 | 2.513828542 | 3.007748276 | 11.36690314 |
| 2.631745586 | 0.162320296 | 3.867066508 | 3.253030529 | 10.34693653 |
| 4.274370039 | 2.681555641 | 3.271128801 | 2.089882409 | 10.47305877 |
| 6.154534495 | 0.941990091 | 3.494811715 | 5.036540001 | 5.519954566 |
| 4.481405061 | 0           | 4.68462509  | 5.11171925  | 8.457019006 |
| 4.465652142 | 6.156066656 | 3.813520737 | 3.591031955 | 16.89017715 |
| 4.357333831 | 0.3169191   | 5.137177368 | 4.902120975 | 5.329126015 |
| 3.646263183 | 6.168930396 | 5.351724544 | 4.178700966 | 16.57421609 |
| 3.760596669 | 6.250929974 | 7.925782359 | 4.44269666  | 11.59920212 |
| 3.891337504 | 0.016387887 | 1.651815352 | 3.891286866 | 6.843624214 |
| 2.830458184 | 0.121752505 | 4.364114966 | 4.003853572 | 8.453053431 |
| 4.205134226 | 6.055434753 | 2.799927136 | 3.704976099 | 16.26270141 |
| 3.799097097 | 5.387027909 | 7.293507429 | 4.744585725 | 9.257497995 |
| 2.861727004 | 0.060895634 | 5.861035807 | 4.467067151 | 7.079413644 |
| 3.108609771 | 5.869014601 | 3.106830885 | 4.293483694 | 14.52965156 |
| 3.660257352 | 0           | 4.95366633  | 3.660376735 | 6.815971573 |
| 3.99624703  | 0           | 1.156172647 | 3.806624614 | 10.61446325 |
| 3.827299894 | 0           | 1.781820325 | 2.564495002 | 14.06430573 |
| 5.039128804 | 0.365044752 | 3.606034564 | 0.362349233 | 17.90066608 |
| 3.750023348 | 0.900666894 | 4.966874133 | 2.181598168 | 14.25742302 |
| 5.041699588 | 0.096996513 | 4.629460791 | 1.95627066  | 13.3892356  |
| 4.571183275 | 0           | 3.735637168 | 4.097974416 | 10.34090137 |
| 4.469102432 | 0           | 2.915697466 | 4.161024398 | 7.108984368 |
| 4.203817749 | 0.084159885 | 6.412760617 | 3.383780947 | 11.39824737 |
| 5.209563352 | 6.398757762 | 5.850514868 | 4.670809804 | 12.66745117 |
| 4.590297114 | 2.807689686 | 4.909241035 | 3.434859002 | 13.36285645 |
| 5.510434256 | 0.109526972 | 4.415548903 | 2.784428054 | 12.84682949 |
| 5.184192146 | 0           | 3.866666452 | 4.156225542 | 12.6982077  |
| 4.058003541 | 0           | 2.757657918 | 4.705551536 | 7.833745309 |
| 3.321605808 | 0.118057944 | 5.683685181 | 4.933445231 | 5.510710266 |
| 4.844482281 | 3.479279775 | 1.683776975 | 1.688035307 | 4.957303645 |
| 5.694447852 | 0.112845622 | 4.101987975 | 3.968746746 | 10.22933116 |
| 3.655168746 | 0.108152357 | 1.994101728 | 3.949999618 | 16.11469271 |
| 3.852384455 | 3.30773227  | 2.978431671 | 4.676727136 | 5.793171073 |
| 3.744271353 | 1.412999079 | 3.749245167 | 3.899433962 | 15.79954634 |

| hsa-miR-301a-3p | hsa-miR-18a-5p | hsa-miR-454-3p | hsa-miR-19a-3p | hsa-miR-1251-5p |
|-----------------|----------------|----------------|----------------|-----------------|
| 3.912234018     | 5.828640676    | 3.756212102    | 8.235026697    | 3.139951648     |
| 4.795407339     | 6.28929578     | 4.362112484    | 7.096866463    | 0.007331006     |
| 5.275372765     | 5.887333032    | 4.727639173    | 6.474967049    | 5.3157          |
| 4.471353213     | 7.264293902    | 4.813909654    | 7.769367704    | 1.411936114     |
| 2.07716739      | 5.848334731    | 3.89712102     | 7.02494937     | 1.05892226      |
| 3.17757867      | 4.092541843    | 3.177585711    | 5.947164949    | 1.732620093     |
| 4.364057718     | 4.972959311    | 5.314068181    | 6.175668843    | 0.248714403     |
| 6.518283441     | 5.944194877    | 6.124896568    | 6.849830518    | 0               |
| 5.184725359     | 4.770340719    | 5.529199347    | 7.243499105    | 1.291278906     |
| 7.540968497     | 8.795625513    | 6.368926638    | 9.646216123    | 4.460507711     |
| 4.853789426     | 5.135950527    | 5.132519098    | 7.948388539    | 0.127152612     |
| 5.615563153     | 6.026010997    | 5.777004356    | 8.783831765    | 0.107362386     |
| 4.091419599     | 5.504158542    | 4.727721204    | 7.137453021    | 0               |
| 4.622864341     | 4.070471391    | 4.697561369    | 5.188030277    | 3.677893004     |
| 5.408179314     | 6.391011563    | 4.807084664    | 8.394773748    | 0               |
| 4.32950907      | 5.521834551    | 5.130093494    | 7.417888542    | 0.085658142     |
| 3.892003267     | 5.925547918    | 3.891936527    | 7.247286412    | 1.214126086     |
| 6.232539041     | 5.967770522    | 5.506806465    | 8.424033571    | 4.247127604     |
| 4.366216739     | 8.242201433    | 4.997647984    | 10.23004536    | 4.820552952     |
| 4.189719952     | 4.798813668    | 4.111829856    | 6.858484419    | 0.963045345     |
| 4.975307096     | 6.026357438    | 4.976292648    | 8.631882763    | 0.44671769      |
| 6.741816715     | 3.576559498    | 7.271792757    | 6.94258168     | 0.126294677     |
| 3.145236039     | 5.693317305    | 4.720561764    | 8.157264255    | 0               |
| 3.928374819     | 6.444754851    | 3.7263177      | 10.39564621    | 3.190399034     |
| 5.058632619     | 6.427762512    | 4.632529888    | 7.650922282    | 3.783354085     |
| 4.597629584     | 6.571458291    | 4.17034286     | 7.702258498    | 4.97030366      |
| 6.418252946     | 8.132912271    | 5.452699133    | 9.133130855    | 4.305780244     |
| 3.869698663     | 4.349091372    | 5.072661039    | 7.288344887    | 0.203291635     |
| 5.042258821     | 7.06201142     | 4.5327544      | 7.634812077    | 1.189213964     |
| 3.972072248     | 6.310042395    | 4.689018393    | 7.190495031    | 0               |
| 4.200159238     | 5.961314901    | 4.622747958    | 6.731521049    | 2.88288064      |
| 5.313867215     | 7.545728345    | 4.504217877    | 8.015350232    | 4.264171736     |
| 4.494457608     | 6.709923879    | 5.499700435    | 10.33751346    | 0.063761753     |
| 4.523423243     | 7.029890525    | 4.391367566    | 9.199656552    | 0.673892944     |
| 4.040233391     | 5.613300698    | 4.040167351    | 6.460970735    | 0               |
| 5.160030394     | 6.66782783     | 4.7568507      | 7.188169573    | 2.753374441     |
| 3.67136858      | 3.671514       | 5.479597961    | 7.645827148    | 0.106848178     |
| 5.454803029     | 7.72833605     | 5.769958608    | 9.344950551    | 0.017713264     |
| 2.547491508     | 7.35834451     | 3.948484611    | 9.084996445    | 0.048540359     |
| 4.784905959     | 7.242724756    | 6.666831385    | 8.978314928    | 0.0262195       |
| 4.280098846     | 5.997897427    | 4.708657027    | 8.267384755    | 0.850494448     |
| 3.846822747     | 5.500431743    | 3.946502636    | 7.007249169    | 0.007312226     |
| 2.904099962     | 5.605579345    | 4.086117368    | 7.531415848    | 1.443779334     |
| 3.633141878     | 4.773388271    | 4.439809057    | 8.428215708    | 0.193639945     |
| 4.435438974     | 6.808475762    | 4.435673717    | 7.66330121     | 5.178502121     |
| 5.031259965     | 5.145906494    | 5.533016028    | 6.891906114    | 2.202442558     |
| 4.860939868     | 4.315958063    | 5.700880246    | 7.315313474    | 4.095272279     |
| 4.639433892     | 7.902069653    | 4.246815111    | 8.909058689    | 3.091270719     |
| 4.922579496     | 5.703598046    | 5.037627621    | 8.008800584    | 2.773797272     |
| 4.769011229     | 4.66438361     | 4.769407302    | 8.73056138     | 0.221593981     |
| 4.401059457     | 7.320706205    | 4.892025521    | 7.96671028     | 3.466444589     |
| 3.897279506     | 4.922565256    | 4.215587061    | 5.561607976    | 0.745004114     |
| 4.572456324     | 4.603945156    | 4.792233635    | 6.353613637    | 3.032548705     |
| 4.457374488     | 5.951797846    | 5.160983237    | 8.792902497    | 0.167072439     |
| 4.073245837     | 5.300621031    | 4.490180145    | 6.758577138    | 0.031685822     |
| 4.38948313      | 6.149225822    | 4.841197201    | 7.542119283    | 0.780752355     |

|             |             |             |             |             |
|-------------|-------------|-------------|-------------|-------------|
| 4.343059803 | 5.192203234 | 4.78956518  | 6.228077806 | 0.111899318 |
| 5.051238512 | 6.79198043  | 5.232147704 | 6.634932739 | 4.793091071 |
| 5.167531258 | 6.921599402 | 4.681844681 | 7.506704229 | 3.736727985 |
| 5.456267969 | 5.34708815  | 5.185936293 | 7.300266939 | 1.6610271   |
| 4.756394159 | 5.26322548  | 4.69674913  | 7.395470008 | 8.068172361 |
| 5.306419634 | 6.478683214 | 5.25569613  | 7.253236874 | 0.089650631 |
| 5.710733051 | 7.439754967 | 5.682171117 | 8.635226801 | 3.35758362  |
| 5.251853593 | 7.47467712  | 4.520516329 | 7.161039773 | 1.11866965  |
| 4.102240475 | 6.49583176  | 5.50059637  | 8.136289985 | 0.748159023 |
| 4.909045343 | 5.932927617 | 5.250092222 | 8.131495172 | 0.00038519  |
| 4.75094469  | 5.722182189 | 4.199057589 | 7.767989785 | 0.164044496 |
| 5.951725589 | 6.622979926 | 6.032900525 | 9.810643771 | 0.904246028 |
| 4.241359462 | 4.2442731   | 5.264847704 | 6.774303822 | 0.213642904 |
| 5.094531173 | 6.178698665 | 5.129995387 | 7.932522158 | 4.423911926 |
| 5.798511128 | 5.672427451 | 5.999980546 | 7.67123478  | 0           |
| 7.027808938 | 8.294479228 | 5.774061287 | 8.171967859 | 1.755424018 |
| 4.819059834 | 5.966629893 | 5.235579923 | 8.667667027 | 1.153492993 |
| 5.571328334 | 8.549872132 | 6.053127604 | 12.24669147 | 0.242461825 |
| 5.503360903 | 6.015105397 | 5.761457471 | 9.047885214 | 3.17613811  |
| 4.017533154 | 5.730506675 | 4.86026846  | 10.15614795 | 0           |
| 5.889566039 | 4.355613074 | 4.433508763 | 4.888379239 | 0.035161531 |
| 4.394902234 | 6.953077326 | 5.528817076 | 9.901327978 | 1.581697273 |
| 5.243831926 | 6.862076775 | 5.026741883 | 7.859839023 | 4.9497127   |
| 4.975736978 | 8.452324551 | 4.359462807 | 9.178231469 | 3.581196471 |
| 4.048964376 | 5.277985769 | 4.4373062   | 7.5247315   | 0.161834247 |
| 4.555746268 | 6.738182461 | 5.462267407 | 8.737998834 | 1.562453683 |
| 4.901403875 | 7.285420365 | 4.53586604  | 8.751887063 | 6.126829403 |
| 4.918808132 | 6.683704479 | 3.916205124 | 7.352733978 | 0.020509651 |
| 5.608532995 | 4.523258303 | 5.155666519 | 5.068542672 | 0           |
| 4.991404923 | 7.998166495 | 4.197502757 | 8.312957886 | 2.294488863 |
| 5.090221319 | 7.912454411 | 5.152370657 | 8.878704127 | 2.487636673 |
| 6.143913742 | 6.350642403 | 6.46501242  | 8.805012684 | 0           |
| 5.607955605 | 6.521448424 | 5.083304593 | 8.684727998 | 1.949107288 |
| 4.757226585 | 7.306178755 | 5.809721496 | 8.328837212 | 0.000419151 |
| 5.828182047 | 4.871848546 | 5.773806282 | 8.230714829 | 0.249056005 |
| 5.099741064 | 5.955686317 | 5.314437415 | 7.737089298 | 0.189387074 |
| 4.319741798 | 6.298215805 | 4.439467464 | 6.877056495 | 2.402648302 |
| 3.533428099 | 5.96090343  | 4.600117587 | 7.067523474 | 0.014031234 |
| 6.240255318 | 9.116246172 | 5.394435275 | 8.802618023 | 4.26041652  |
| 4.415017803 | 5.674370504 | 4.565027536 | 6.661366993 | 2.479336393 |
| 4.349648629 | 5.617392893 | 3.9370801   | 6.96669703  | 1.805657536 |
| 4.334643842 | 4.681044584 | 4.233966651 | 7.35272939  | 2.706861105 |
| 3.41371886  | 3.953216594 | 3.413715306 | 7.25489686  | 0           |
| 4.432189574 | 6.067466806 | 4.015925705 | 7.471727074 | 5.195791275 |
| 3.691918097 | 6.648631926 | 3.044807904 | 6.050269103 | 1.173378673 |
| 5.612701943 | 6.078221877 | 5.771497164 | 7.86581666  | 0           |
| 5.536810571 | 9.131659394 | 6.02655203  | 9.303785988 | 1.571424719 |
| 3.739763527 | 4.914791161 | 3.73971396  | 6.504963642 | 1.948376203 |
| 5.031294712 | 8.254165623 | 4.295511191 | 8.683655321 | 0.502762614 |
| 4.953222504 | 5.514767268 | 4.58349871  | 6.370221181 | 2.260014452 |
| 5.016745792 | 5.99427328  | 4.920465224 | 6.040898214 | 3.51841399  |
| 5.762795098 | 5.814888273 | 5.099992787 | 5.894854349 | 0           |
| 4.449268938 | 5.845419177 | 4.973615328 | 7.669564139 | 0           |
| 5.138540594 | 8.495948973 | 4.068079573 | 8.427206972 | 3.412169799 |
| 4.251105502 | 4.390142418 | 4.299307174 | 4.908344243 | 0           |
| 6.033935279 | 6.102713132 | 5.98664352  | 8.260993591 | 1.050466089 |
| 4.650760282 | 5.830290487 | 5.91045282  | 6.899064589 | 0.023616056 |
| 4.562389704 | 6.348235442 | 4.699032881 | 8.176883459 | 0           |



|             |             |             |             |             |
|-------------|-------------|-------------|-------------|-------------|
| 4.571669259 | 5.309187656 | 5.7814664   | 7.251766747 | 4.884164491 |
| 3.996719469 | 4.40842217  | 4.669003601 | 4.939379097 | 1.639117689 |
| 4.852309121 | 7.326704533 | 5.295399848 | 8.146237569 | 1.348861234 |
| 5.208137307 | 6.827637074 | 4.405931408 | 7.556753963 | 2.036789878 |
| 4.147610484 | 6.456974053 | 4.470809552 | 6.826134012 | 1.097018132 |
| 6.433615539 | 8.033623275 | 6.547756333 | 9.070651803 | 5.611425346 |
| 5.144061627 | 6.640319655 | 4.662238436 | 7.524588022 | 1.478107415 |
| 4.775589466 | 6.181113287 | 5.136720969 | 6.134151081 | 0           |
| 5.031773395 | 6.299112918 | 5.279805107 | 8.093267294 | 0.005715141 |
| 8.559515329 | 6.881724718 | 6.937171769 | 8.857420723 | 0.049949222 |
| 5.702631254 | 7.064699563 | 5.737642783 | 7.974151099 | 5.032235381 |
| 4.60059018  | 6.213585802 | 5.254876014 | 7.963571479 | 1.136607962 |
| 6.146955548 | 7.652752765 | 6.061235062 | 8.553047624 | 3.214165756 |
| 3.633162924 | 6.792418563 | 4.907869464 | 8.473313139 | 2.629628886 |
| 4.230111593 | 4.729770269 | 4.667686384 | 7.497265178 | 0.026863636 |
| 5.034544209 | 5.789094128 | 5.034687468 | 8.577061042 | 0.077252374 |
| 5.825417059 | 5.222746643 | 5.638184419 | 6.092994624 | 2.685958413 |
| 4.231489752 | 5.094700017 | 4.878696212 | 6.469112608 | 1.1537873   |
| 5.056821178 | 4.405157904 | 5.937146827 | 5.438632439 | 0           |
| 4.96510069  | 7.356172326 | 4.80008972  | 7.796230345 | 0           |
| 4.581309703 | 4.137534657 | 4.858849507 | 7.76314763  | 1.222886519 |
| 5.56923734  | 7.24822333  | 5.303578811 | 6.504145869 | 0           |
| 3.659481199 | 5.338785504 | 2.999684044 | 6.60436111  | 4.522089079 |
| 7.687459584 | 7.116614452 | 6.679071433 | 9.565175067 | 5.298291685 |
| 4.164852455 | 7.199995631 | 4.968426309 | 9.466681827 | 3.475540447 |
| 4.914125014 | 5.693323832 | 5.751613499 | 7.431481211 | 0.019624809 |
| 3.815560406 | 4.993265669 | 5.60603551  | 5.762868314 | 6.016884443 |
| 4.437717271 | 6.58605302  | 4.716712213 | 8.409203585 | 0           |
| 4.76120305  | 5.65027516  | 5.050738488 | 8.876868934 | 0.001132844 |
| 3.755134178 | 5.643231109 | 4.375290137 | 7.844911171 | 0.299697367 |
| 4.460584615 | 5.859054936 | 4.790334296 | 7.836448869 | 0.199354689 |
| 6.066028216 | 7.87763802  | 4.863509114 | 7.802091618 | 5.047104817 |
| 4.786977529 | 7.539994341 | 5.086947532 | 7.977806587 | 0.015853043 |
| 4.885224377 | 7.910965661 | 5.210282565 | 8.867984455 | 0.116838933 |
| 2.932712064 | 4.864460076 | 3.972882575 | 7.021223541 | 0           |
| 4.960239293 | 8.568290911 | 4.909569175 | 8.836406474 | 0.018759922 |
| 3.996901166 | 3.997356342 | 4.826412391 | 3.613088614 | 1.824619154 |
| 4.699412441 | 7.259185227 | 5.102246244 | 8.336640148 | 0           |
| 5.32820814  | 5.988410198 | 5.386884119 | 7.552260864 | 0           |
| 6.695233916 | 7.948196995 | 6.478986767 | 10.17020335 | 5.884729257 |
| 2.752832576 | 4.257988887 | 3.82558165  | 5.794051082 | 2.754932277 |
| 4.335344541 | 5.920589923 | 5.277652885 | 9.26273172  | 0.343969397 |
| 3.650081803 | 4.088078559 | 4.010655425 | 4.482444236 | 0           |
| 2.737458475 | 6.144133915 | 3.613549027 | 8.476702467 | 4.025262586 |
| 4.511667056 | 8.069143801 | 3.735637311 | 9.310080174 | 3.101363143 |
| 4.96147508  | 2.79702884  | 4.649234854 | 4.902052594 | 0.601693164 |
| 4.574248895 | 5.45700577  | 4.402760863 | 6.607158261 | 2.683151587 |
| 5.401510119 | 6.428787739 | 5.715852357 | 7.564751276 | 0.06964461  |
| 4.813914299 | 7.611170703 | 4.6031829   | 7.84921128  | 2.33876513  |
| 5.648157069 | 8.036675874 | 6.16486212  | 8.542097417 | 0.105204177 |
| 7.952898049 | 7.238333808 | 6.773795179 | 8.354966194 | 4.945559692 |
| 6.968183341 | 7.107962651 | 6.215224478 | 7.325539206 | 4.305617256 |
| 4.122868529 | 5.19838713  | 4.544727454 | 6.990885444 | 0.113325176 |
| 3.923239381 | 8.54868384  | 4.529634233 | 10.70920908 | 0.218321702 |
| 6.802609217 | 6.153828162 | 6.580160619 | 8.898328445 | 4.757430604 |
| 3.814497174 | 4.832007348 | 3.814585379 | 7.369160145 | 0.103894639 |
| 6.345107388 | 7.350531412 | 5.586737603 | 9.365844285 | 1.252278986 |
| 4.847507081 | 7.108778526 | 5.061479751 | 8.029486201 | 0.125646084 |

| hsa-miR-3127-5p | hsa-miR-500b-3p | hsa-miR-362-3p | hsa-miR-135a-5p | hsa-miR-3662 |
|-----------------|-----------------|----------------|-----------------|--------------|
| 4.290774868     | 2.525520508     | 4.598369008    | 3.911889782     | 1.411825794  |
| 3.846562011     | 3.207758093     | 4.432296342    | 0.007717724     | 1.615742666  |
| 3.613284735     | 2.845224931     | 3.072969242    | 4.817516936     | 1.768458479  |
| 4.528109284     | 3.481613038     | 3.77605966     | 0.86126796      | 1.413935402  |
| 4.411937104     | 3.408344603     | 4.260124459    | 1.058258414     | 2.399887329  |
| 3.501502001     | 2.755003355     | 3.767263015    | 1.732217255     | 0.03233199   |
| 3.296547114     | 1.77191342      | 4.197125166    | 5.148831356     | 2.887470885  |
| 5.643908463     | 2.115481304     | 3.81628021     | 1.037015379     | 0            |
| 4.363348089     | 3.786978698     | 4.463972858    | 3.930776737     | 1.29384554   |
| 5.217407643     | 3.561692549     | 3.556553817    | 3.463770889     | 1.251910403  |
| 2.869682381     | 2.076875532     | 3.378250483    | 3.148664094     | 3.341427942  |
| 3.823730099     | 2.006552031     | 3.966500531    | 2.794438114     | 1.351535638  |
| 3.24653891      | 3.624543767     | 3.508386053    | 0.950790382     | 0            |
| 4.617559678     | 2.926944314     | 2.930763392    | 5.589177174     | 1.248928204  |
| 4.037925787     | 2.53951729      | 4.3421927      | 0.968440937     | 0.968205116  |
| 2.368595544     | 3.202226101     | 3.207565       | 0.091076971     | 3.552344047  |
| 3.962194561     | 3.105932941     | 4.49555859     | 4.400784883     | 2.549898967  |
| 6.079288407     | 4.567464515     | 3.471901241    | 5.507229819     | 4.43128853   |
| 2.932985694     | 3.63182453      | 3.211806088    | 7.024623513     | 2.117145513  |
| 3.403275433     | 2.270733698     | 3.265969374    | 0               | 0.963206466  |
| 3.517292522     | 2.280661756     | 4.793346269    | 0.49803173      | 2.216936824  |
| 4.169148892     | 1.415758595     | 2.526073052    | 0.134983688     | 0.113133184  |
| 4.516915867     | 4.278762264     | 5.273305601    | 1.445070053     | 0            |
| 3.915919841     | 2.843710739     | 4.396730768    | 3.490190888     | 2.350301759  |
| 3.688675124     | 3.246821474     | 3.108587315    | 5.444991478     | 0            |
| 4.178234547     | 3.514678419     | 4.054936284    | 5.232961098     | 1.207136859  |
| 4.966080921     | 3.757567745     | 4.644251836    | 4.381272616     | 0.009975665  |
| 2.335473586     | 2.330722759     | 4.584959003    | 1.641528773     | 4.613401136  |
| 4.450471222     | 4.182143194     | 5.092407106    | 4.677694588     | 0.05022097   |
| 2.988280718     | 3.567188715     | 4.931312645    | 0               | 0.78764287   |
| 2.888064295     | 2.542429958     | 4.421840549    | 5.719464285     | 0.118086948  |
| 3.761493055     | 3.875597203     | 2.751832972    | 4.087034858     | 1.725683243  |
| 2.613236349     | 2.881255613     | 4.227058388    | 0.067606688     | 2.6009459    |
| 2.794902206     | 2.092405868     | 4.959692252    | 3.160108223     | 0            |
| 3.399821798     | 2.612753047     | 5.067924444    | 1.657970566     | 0            |
| 4.017322123     | 2.901432665     | 3.267817955    | 2.400362795     | 2.412406723  |
| 4.089139932     | 1.35535685      | 4.512709133    | 0.113915282     | 1.992905598  |
| 3.090090167     | 3.550760737     | 4.182068221    | 1.061266811     | 0.016206892  |
| 3.702806155     | 3.40775532      | 4.05481657     | 0.051368038     | 1.780533792  |
| 1.695127942     | 2.712041082     | 4.783828829    | 4.84150347      | 2.931707696  |
| 3.848887228     | 3.352560004     | 4.401170524    | 3.089603996     | 0.850773662  |
| 4.126874245     | 2.844261576     | 3.498182816    | 0.007697935     | 0.006704205  |
| 2.901265727     | 4.19655148      | 4.882036377    | 5.552239205     | 1.435802401  |
| 3.624090215     | 5.838671759     | 7.037461337    | 0.208766273     | 2.723426842  |
| 4.037873225     | 2.19419114      | 2.197719325    | 7.766851533     | 5.671647157  |
| 2.872033515     | 3.454012326     | 3.673588997    | 2.871600455     | 0.914715026  |
| 3.396694022     | 3.03174942      | 4.458369266    | 8.272301458     | 0.243878504  |
| 2.481869876     | 2.478812891     | 4.242730215    | 3.704342558     | 1.374139755  |
| 3.929744085     | 3.227243011     | 4.216547141    | 2.365472386     | 2.372247161  |
| 2.858141262     | 0.221792601     | 4.955181682    | 0.239772591     | 2.808422642  |
| 4.185340215     | 1.986746986     | 3.943355589    | 3.277345861     | 3.02008667   |
| 3.287877241     | 2.419788429     | 2.603809592    | 1.269688486     | 0.744958064  |
| 4.278561325     | 3.460361141     | 3.296757539    | 3.120959626     | 0            |
| 3.903039166     | 3.010947328     | 3.53154928     | 3.301341588     | 3.480345599  |
| 3.158458071     | 3.481492659     | 3.483743016    | 2.739060662     | 0.028911202  |
| 3.454421099     | 5.194286269     | 6.760096616    | 2.260361158     | 0.78085774   |

|             |             |             |             |             |
|-------------|-------------|-------------|-------------|-------------|
| 3.314934358 | 2.806495141 | 4.930202313 | 4.538022063 | 3.057601703 |
| 4.120558969 | 3.958581517 | 3.542987865 | 4.87605026  | 1.493672154 |
| 3.495778426 | 2.619089707 | 4.207286137 | 3.844494043 | 1.024084455 |
| 4.343806819 | 3.414117595 | 4.266148087 | 2.082390324 | 1.659660488 |
| 4.401539498 | 4.773450584 | 5.187555909 | 7.772246574 | 2.685536074 |
| 3.888496331 | 4.600210204 | 4.018160476 | 4.020590626 | 3.860757393 |
| 5.710118942 | 3.205329655 | 3.035440234 | 2.842341691 | 5.079399173 |
| 3.082635615 | 5.19338719  | 4.165430521 | 1.122705198 | 2.589655549 |
| 4.166837622 | 3.499827127 | 4.38567306  | 3.829982372 | 2.937686685 |
| 3.809434707 | 1.586618025 | 3.461491682 | 1.001345904 | 2.001753256 |
| 2.206118943 | 2.20297636  | 3.520255677 | 0.176183773 | 2.181686252 |
| 4.0188279   | 3.552915208 | 3.848977425 | 4.430964378 | 0           |
| 4.227328874 | 2.823822709 | 3.184219959 | 0.230930343 | 2.784624448 |
| 4.237564426 | 2.792298833 | 4.633499519 | 5.702352813 | 0.862077925 |
| 4.538296035 | 3.070146953 | 4.064863756 | 2.228704828 | 0           |
| 5.214851525 | 4.532006973 | 4.018977457 | 1.140423626 | 2.77371882  |
| 3.024233574 | 2.796536561 | 3.546135801 | 2.199084913 | 2.521448178 |
| 4.595676433 | 4.151858413 | 5.557780951 | 1.752942619 | 0.212482069 |
| 4.910956765 | 2.724096543 | 4.096247156 | 5.718210484 | 3.630100354 |
| 2.715641062 | 3.033484757 | 5.151038409 | 1.356245958 | 2.318999827 |
| 5.709273174 | 2.486430493 | 2.755153059 | 1.120417259 | 1.120710826 |
| 3.581333458 | 4.96153988  | 4.259519723 | 5.873878033 | 3.899089133 |
| 2.630489883 | 3.252025302 | 3.819972266 | 5.539366881 | 1.539337698 |
| 3.062156058 | 4.352341975 | 3.585238697 | 5.320639555 | 0.048031383 |
| 3.508579811 | 2.992306103 | 3.887529361 | 2.198341477 | 4.36972731  |
| 3.971485822 | 4.495090102 | 5.180198488 | 5.292427608 | 4.673353391 |
| 5.07561256  | 4.590582671 | 5.104972695 | 5.163521054 | 0.751957641 |
| 4.356884354 | 3.564788731 | 3.104257989 | 1.070824866 | 2.905378643 |
| 3.909544584 | 2.566306111 | 3.38463408  | 1.534692579 | 2.154243335 |
| 3.490835178 | 3.852792025 | 3.146937648 | 1.341761243 | 0.802450183 |
| 3.105840575 | 3.528246109 | 5.262743997 | 7.096953013 | 2.805626348 |
| 4.312310646 | 3.590118035 | 4.684995069 | 1.522025744 | 2.282045341 |
| 1.953483337 | 4.199482665 | 5.066425607 | 6.938905768 | 1.914782105 |
| 3.587207776 | 3.324127628 | 5.002329432 | 0.000440877 | 2.001907757 |
| 3.578676491 | 3.284960373 | 3.302401707 | 1.771403873 | 1.750000742 |
| 5.004651966 | 4.989072485 | 4.4164249   | 0.204068767 | 2.260070976 |
| 1.830873385 | 0.874110078 | 4.497117754 | 6.406726326 | 0           |
| 4.07477125  | 4.466737515 | 4.934349449 | 0.014783896 | 0.012847366 |
| 3.320671323 | 3.513731436 | 4.305023076 | 3.213782709 | 2.363917158 |
| 4.920188985 | 3.278058609 | 3.653619475 | 3.269926436 | 0           |
| 2.117478561 | 3.941515896 | 2.948142397 | 2.117695473 | 0           |
| 2.709781973 | 4.114656485 | 4.67571261  | 4.824456695 | 2.358719735 |
| 2.763709023 | 3.861218402 | 4.47649452  | 2.280353486 | 0.97020771  |
| 2.68550867  | 2.684869328 | 3.692202974 | 5.199036679 | 2.09098738  |
| 3.537953211 | 2.484473714 | 3.157984526 | 0.676348145 | 0           |
| 4.107215489 | 1.367311557 | 3.62457834  | 0.826114881 | 0           |
| 3.568062441 | 2.791294158 | 4.506143438 | 1.985308143 | 5.71162093  |
| 4.212027111 | 2.912682658 | 3.279394622 | 3.042812893 | 0           |
| 4.842884258 | 5.027036311 | 5.93615625  | 0           | 0           |
| 2.97133344  | 3.671948174 | 3.5572428   | 2.885695175 | 2.407867805 |
| 5.347241675 | 3.057696841 | 2.641371281 | 3.51944964  | 3.378123728 |
| 3.477440201 | 2.521396843 | 4.559176014 | 0.982670655 | 0           |
| 3.717735487 | 3.138811973 | 3.809545286 | 1.438271513 | 2.826193528 |
| 2.422151107 | 2.422878385 | 2.42198371  | 0.889167217 | 2.427390539 |
| 4.304895278 | 2.609583848 | 3.006046601 | 1.148523525 | 1.519685826 |
| 3.073527354 | 2.066084985 | 4.399579602 | 1.049894413 | 2.064441715 |
| 4.447043937 | 3.289248167 | 2.434545564 | 3.444129214 | 4.286815545 |
| 3.369999918 | 3.258720469 | 4.515796698 | 0.795784568 | 0.793328905 |

|             |             |             |             |             |
|-------------|-------------|-------------|-------------|-------------|
| 2.536930174 | 2.528866185 | 4.560257614 | 9.007815394 | 0.233739596 |
| 4.285745455 | 3.321397705 | 3.779064482 | 4.832603797 | 0.689861404 |
| 3.502567611 | 2.709937019 | 4.772275078 | 3.022807409 | 0           |
| 3.639020018 | 3.05325559  | 4.643847599 | 2.873216033 | 1.178230569 |
| 3.95258497  | 3.310150093 | 4.792490006 | 5.279924928 | 2.939398885 |
| 3.797102053 | 2.426361243 | 4.951107741 | 5.356415137 | 1.972579056 |
| 4.209348129 | 3.182388881 | 4.834721795 | 2.839807159 | 3.969964593 |
| 1.655344511 | 2.023537755 | 3.031065481 | 0.429455628 | 0.41990609  |
| 2.836459994 | 3.937268936 | 5.675541326 | 1.019906467 | 2.835233601 |
| 4.254157527 | 3.242249571 | 3.24539204  | 2.221955241 | 1.785936691 |
| 3.321376247 | 1.227370412 | 2.898072573 | 5.989186689 | 5.441950029 |
| 2.775120309 | 2.176947431 | 4.908167925 | 1.748695346 | 0.036041188 |
| 3.21836223  | 2.985865929 | 3.885874207 | 4.241278387 | 0.079893363 |
| 4.048447631 | 2.852831804 | 3.855749041 | 4.693517719 | 0.008276186 |
| 4.311211723 | 2.715064924 | 5.143916708 | 0.028350599 | 0.024534631 |
| 4.286653512 | 1.895581377 | 4.70726869  | 1.258628532 | 1.257882326 |
| 4.649199317 | 3.202384467 | 3.490821956 | 2.962261432 | 4.033735722 |
| 5.847786162 | 3.681925397 | 2.199691312 | 0.04724822  | 1.152367561 |
| 4.614311339 | 1.492259447 | 2.236395196 | 0           | 0           |
| 2.803142846 | 2.495413002 | 4.03795085  | 1.185048978 | 0.678167417 |
| 3.488026188 | 3.31210925  | 5.088260106 | 5.036232781 | 0.05938373  |
| 4.928484269 | 2.194793907 | 3.783312335 | 1.746241349 | 0.609102745 |
| 3.519091558 | 1.747295381 | 3.366356858 | 4.907398457 | 1.133895977 |
| 4.604867612 | 4.37877636  | 5.345111031 | 6.960836228 | 1.75133188  |
| 2.631074062 | 0.155417149 | 3.687191182 | 4.888311934 | 1.493644618 |
| 3.687438173 | 2.680821777 | 4.010929582 | 3.562173705 | 0.017949078 |
| 4.715100154 | 2.913854855 | 3.370110923 | 7.12438121  | 3.086119142 |
| 5.670922786 | 4.490367313 | 6.030282442 | 0.57516321  | 0.568467677 |
| 3.175869493 | 1.589828014 | 4.706704654 | 3.706576893 | 0.001039925 |
| 2.631060717 | 2.621082763 | 4.185591444 | 0.327617945 | 2.570403521 |
| 3.844747199 | 3.400402248 | 4.570744926 | 0.215086668 | 0.176118118 |
| 3.50165661  | 3.301579835 | 4.33899419  | 3.758329869 | 2.62716342  |
| 3.542204826 | 4.543379015 | 5.086207423 | 5.040985662 | 1.055150699 |
| 3.862796634 | 2.48645105  | 5.145101862 | 0.124726185 | 2.468488147 |
| 3.461895556 | 2.937531392 | 4.203850681 | 0           | 1.182857049 |
| 3.266169632 | 5.269512719 | 5.146049127 | 1.064847852 | 5.000873425 |
| 1.200050936 | 2.589796458 | 2.862101021 | 4.205160698 | 4.082587209 |
| 3.401274308 | 2.878962645 | 5.185508611 | 1.14135081  | 0           |
| 5.653189942 | 1.791242009 | 4.141722899 | 0           | 0           |
| 3.936599088 | 4.002665903 | 4.491925355 | 6.915411765 | 1.154542997 |
| 2.564606382 | 1.781206468 | 3.826724939 | 3.739029843 | 0.838029748 |
| 2.758020788 | 5.112210303 | 5.883517193 | 3.246034733 | 2.683077982 |
| 2.850181523 | 2.851153752 | 3.544414533 | 1.866646429 | 0.900410626 |
| 3.009019225 | 4.444521346 | 3.239785516 | 6.533980098 | 0.084072289 |
| 3.629586109 | 3.389900395 | 4.88097532  | 0.954470989 | 2.259690115 |
| 4.584815794 | 2.800361473 | 2.664377216 | 2.179094765 | 1.447648904 |
| 2.957738899 | 3.552201554 | 4.096960364 | 6.456440588 | 0.073191215 |
| 4.993617569 | 3.330237514 | 3.662371921 | 3.803458121 | 3.315203737 |
| 3.667090814 | 3.144570773 | 3.157591096 | 3.44162989  | 3.803199939 |
| 3.057884514 | 3.65363946  | 2.785208494 | 1.347245034 | 3.456315541 |
| 4.396269721 | 4.159851565 | 6.04743016  | 8.581312636 | 0           |
| 3.970895889 | 2.96073117  | 4.17938197  | 5.942665401 | 0.463878134 |
| 2.476252604 | 3.315131508 | 3.521312044 | 1.372557284 | 2.455968858 |
| 3.196323543 | 3.696939445 | 4.848969063 | 2.851765073 | 1.668864542 |
| 4.60410321  | 3.961054631 | 4.844216491 | 5.619269968 | 3.794743621 |
| 3.282308431 | 0.103970484 | 3.951865257 | 0.110724578 | 2.421954768 |
| 3.070377695 | 3.520838566 | 5.004275284 | 1.957475712 | 0.476003692 |
| 3.898491752 | 1.413762822 | 4.17005413  | 0.134279306 | 2.836058346 |

| hsa-miR-1269b | hsa-let-7c-5p | hsa-miR-103a-2-5 | hsa-miR-122b-5p | hsa-miR-224-3p |
|---------------|---------------|------------------|-----------------|----------------|
| 0.1403126     | 13.65067336   | 2.520768042      | 2.869866845     | 3.756006545    |
| 1.025042067   | 13.72689713   | 2.8440344        | 2.033989824     | 4.898553752    |
| 0             | 12.20354049   | 1.565500556      | 1.923719986     | 4.657552356    |
| 10.11742521   | 13.42470398   | 2.382169249      | 3.777222976     | 6.070920846    |
| 2.401936894   | 12.35157288   | 2.401762149      | 3.256399833     | 2.892258159    |
| 10.12675916   | 13.73829956   | 1.732090212      | 2.488592925     | 1.121347049    |
| 6.217900669   | 13.24563409   | 2.462067465      | 2.477508327     | 0.270643234    |
| 0.576612514   | 11.45285166   | 3.424522469      | 0.566340893     | 7.932465356    |
| 1.682973122   | 11.98138415   | 2.639413275      | 5.871051704     | 5.154585757    |
| 6.751028102   | 12.26954857   | 4.842675998      | 5.653328696     | 2.3953462      |
| 0.14007874    | 13.44031551   | 4.027757067      | 0.130741916     | 5.067299057    |
| 0.11783473    | 12.62001085   | 4.076786456      | 2.453135612     | 5.333676355    |
| 11.30756097   | 14.37388413   | 2.514356166      | 0.950334424     | 6.294355328    |
| 2.319709421   | 11.34106489   | 2.319552737      | 2.323330715     | 5.13298865     |
| 0.969009421   | 13.66896753   | 2.953494554      | 4.757253604     | 6.13834878     |
| 7.463168872   | 12.98478384   | 1.925280155      | 4.944161901     | 2.706239753    |
| 11.14708265   | 12.63440608   | 2.986987763      | 3.41832341      | 4.536881438    |
| 12.09202961   | 12.80483873   | 2.684123805      | 8.133321678     | 2.679527782    |
| 0.159025426   | 14.42819547   | 2.920454458      | 1.469439334     | 5.811081942    |
| 3.114629148   | 14.1486887    | 2.271037296      | 1.950940867     | 2.531980778    |
| 0.524217521   | 15.01025444   | 2.990581257      | 0.4671512       | 5.76396357     |
| 0.139110962   | 9.389479888   | 4.570842726      | 0.129853927     | 3.576552067    |
| 1.447173094   | 11.7009315    | 2.161981346      | 4.770375991     | 4.621429858    |
| 9.528825912   | 13.73434438   | 3.687549606      | 3.713231143     | 6.618586136    |
| 0             | 12.74685475   | 2.794382261      | 2.384015529     | 4.681367444    |
| 0             | 12.05573813   | 2.372538547      | 1.473134031     | 2.492273452    |
| 8.41921006    | 10.52734295   | 4.379088147      | 2.862403448     | 4.644658393    |
| 0.227243837   | 12.6441587    | 1.641294361      | 3.85683022      | 2.335856315    |
| 1.18369468    | 13.06838846   | 2.573038087      | 4.982604348     | 6.480304333    |
| 10.87771221   | 13.64150202   | 3.366318446      | 1.321637044     | 6.799560703    |
| 0.145516809   | 11.31675569   | 2.537441124      | 5.074987633     | 5.273389924    |
| 11.35166392   | 13.43323671   | 2.973904634      | 2.751342307     | 4.504121055    |
| 0.069410425   | 13.89193423   | 3.765716591      | 1.216792659     | 5.539080445    |
| 0             | 12.21419819   | 3.464407857      | 3.455886731     | 5.51729438     |
| 2.61307966    | 13.03744599   | 2.92951834       | 2.21094396      | 5.404808671    |
| 0             | 9.642596778   | 2.190553178      | 6.041899496     | 3.560717408    |
| 1.345388013   | 14.58322031   | 3.054634797      | 3.06393388      | 7.518198864    |
| 7.750301045   | 11.77775323   | 3.675618646      | 2.08125045      | 5.741292303    |
| 1.161859698   | 12.25162475   | 1.166660015      | 1.166434933     | 4.250334015    |
| 0.028343455   | 11.45350943   | 3.300546334      | 1.091051428     | 2.938169283    |
| 0             | 13.5410798    | 3.354792074      | 2.584359774     | 6.109055186    |
| 1.6155821     | 12.87183134   | 2.843941337      | 1.61620372      | 6.548767647    |
| 9.748390074   | 14.01491295   | 2.10223463       | 2.90059723      | 4.887849016    |
| 0.216052462   | 13.92625598   | 2.749342792      | 4.154665652     | 3.633002009    |
| 0.178987887   | 12.6171873    | 1.520225333      | 5.863683628     | 4.188490944    |
| 0             | 13.26396407   | 1.480309611      | 3.040657068     | 4.033985828    |
| 1.839917979   | 14.72039187   | 1.85197624       | 3.676265758     | 5.634513293    |
| 1.369623555   | 13.70408622   | 2.812622338      | 2.821360118     | 5.604204423    |
| 12.44767899   | 13.39103252   | 3.09329719       | 4.615011141     | 2.365506614    |
| 0.248581487   | 14.8272788    | 3.184513239      | 2.393232075     | 1.69358678     |
| 0.111711846   | 13.08387916   | 2.426256406      | 0.104626478     | 1.336648506    |
| 0             | 14.6526748    | 0                | 1.954117861     | 3.390617729    |
| 1.653341158   | 13.2596474    | 2.087886029      | 0.549397474     | 4.185811857    |
| 4.210794577   | 12.50315123   | 4.176329178      | 0.172148509     | 4.068903627    |
| 12.21603948   | 13.74558524   | 2.469630816      | 2.738472893     | 6.102088897    |
| 0.787136074   | 13.42466354   | 2.009659137      | 0               | 4.879673442    |

|             |             |             |             |             |
|-------------|-------------|-------------|-------------|-------------|
| 11.10382634 | 12.53538205 | 1.370402022 | 4.529426066 | 3.692436079 |
| 1.787927519 | 12.94088602 | 1.121606398 | 4.318555949 | 1.782082495 |
| 0.007410643 | 12.77334424 | 2.031674289 | 2.031913374 | 1.614216663 |
| 2.407306832 | 12.9258645  | 2.081807246 | 4.417767398 | 6.289012971 |
| 0           | 14.86298895 | 2.901312277 | 2.389530388 | 4.603039606 |
| 1.292364689 | 10.51117205 | 2.379344826 | 4.75895446  | 1.298042899 |
| 0.007384986 | 11.55974873 | 3.204974152 | 4.036834932 | 2.842341314 |
| 1.784340309 | 10.27149795 | 2.415296758 | 4.267249076 | 2.968752284 |
| 10.329239   | 12.68107355 | 3.76389987  | 5.968138362 | 2.608894227 |
| 1.586585344 | 12.99586508 | 2.809299884 | 2.001799034 | 6.211631047 |
| 0.181994892 | 14.06933318 | 2.650146085 | 2.661551152 | 4.839531081 |
| 1.469962093 | 11.70020166 | 2.667805031 | 3.024945875 | 2.446331679 |
| 2.358089795 | 13.39720398 | 2.356155501 | 0.220673126 | 4.74009476  |
| 9.146597353 | 12.97114657 | 2.604053797 | 0.862216685 | 5.326721772 |
| 0.935232159 | 12.85163129 | 2.229528687 | 3.896032327 | 3.068927471 |
| 1.137758879 | 11.28363294 | 4.206014643 | 2.184362596 | 5.07576428  |
| 1.148991254 | 13.08754145 | 2.794614447 | 3.391314279 | 1.76865066  |
| 9.878325765 | 11.60985245 | 3.959450609 | 2.924530671 | 3.567947318 |
| 11.39043049 | 11.79730197 | 3.960325607 | 3.174225004 | 5.783006158 |
| 1.751862334 | 14.01466585 | 2.530587722 | 3.290895367 | 3.606675486 |
| 13.19142834 | 14.24680123 | 1.730885955 | 1.121477352 | 4.887553697 |
| 1.566881331 | 14.05376241 | 3.758461393 | 4.380494724 | 4.512888651 |
| 5.429703586 | 13.55062062 | 2.916914718 | 2.910151865 | 3.676079208 |
| 11.7282758  | 11.17122151 | 1.181024903 | 1.180812207 | 3.852469832 |
| 1.509471886 | 12.91726835 | 3.259553569 | 4.816551129 | 3.892013947 |
| 5.42970093  | 14.04430127 | 1.975686287 | 5.100288228 | 2.296299553 |
| 7.311793985 | 11.88265578 | 1.661934631 | 5.537554014 | 5.685140852 |
| 6.263486144 | 8.223116424 | 2.908247593 | 3.56573023  | 3.104493625 |
| 0           | 12.80483416 | 0.918211025 | 3.387753981 | 0.925625867 |
| 4.478945481 | 13.83190197 | 2.29604554  | 4.483390597 | 1.341875699 |
| 0.128849303 | 12.87141904 | 3.323831532 | 2.04319163  | 4.732797638 |
| 0.663848123 | 11.62943848 | 4.371685551 | 2.760272036 | 4.886493719 |
| 10.69444914 | 12.83930168 | 3.464440894 | 2.673142869 | 4.723389384 |
| 12.1968614  | 12.01608596 | 1.001482643 | 1.001477954 | 4.324246383 |
| 0.280885573 | 12.26611108 | 4.904662496 | 0.257731629 | 5.715381432 |
| 8.290109123 | 13.70133267 | 3.586272798 | 4.139397079 | 3.383093961 |
| 5.698086753 | 12.17259605 | 3.507024955 | 0           | 5.699435387 |
| 2.653951148 | 13.15327274 | 3.070420743 | 3.658660425 | 5.164640477 |
| 10.15649809 | 8.279371618 | 2.987452746 | 2.981190716 | 4.14084394  |
| 0.5892321   | 12.72341898 | 1.406541357 | 5.494269274 | 4.3750418   |
| 6.688234896 | 13.0595311  | 1.407164946 | 2.781414037 | 3.768510423 |
| 0.094904864 | 13.82092907 | 2.368292397 | 1.291510444 | 3.740576454 |
| 12.47888421 | 14.14162284 | 2.542698491 | 4.997348844 | 6.962902558 |
| 10.37431663 | 12.35130698 | 1.071512409 | 3.807502764 | 2.685762726 |
| 10.91186381 | 11.09776862 | 1.173405834 | 4.896320665 | 4.856284141 |
| 0.829076658 | 10.4616204  | 3.052042044 | 0           | 5.133383473 |
| 9.018025009 | 9.636472805 | 3.89019224  | 2.79120125  | 2.306519934 |
| 1.269003134 | 14.22892855 | 0.740294323 | 2.910478098 | 4.84475539  |
| 1.579769227 | 13.0254871  | 2.183564409 | 0.950129613 | 5.827240949 |
| 1.136356178 | 12.10237374 | 2.264171182 | 2.889031718 | 4.15878123  |
| 0.012230874 | 11.3293744  | 0.011078963 | 1.633261796 | 2.641397583 |
| 0           | 14.90320408 | 2.776297377 | 0           | 4.619748604 |
| 1.841337415 | 12.59855607 | 2.631459289 | 2.410594456 | 0.881490448 |
| 0           | 11.55856021 | 3.413857046 | 0           | 0.889235739 |
| 3.410298404 | 13.12492209 | 0           | 2.753382596 | 3.493864117 |
| 8.041090264 | 12.32002706 | 4.534763437 | 3.396684636 | 5.249152492 |
| 0.025516792 | 13.72910418 | 2.106761664 | 1.082134632 | 3.29111534  |
| 1.723515725 | 13.24143389 | 4.192406291 | 1.328797078 | 2.494689807 |

|             |             |             |             |             |
|-------------|-------------|-------------|-------------|-------------|
| 1.806923433 | 14.78171152 | 3.328337988 | 2.535968542 | 0.292365764 |
| 9.370446468 | 14.59423409 | 1.956424933 | 0.694062551 | 5.371745705 |
| 10.08232699 | 12.08652153 | 2.523451764 | 3.50292329  | 5.324658979 |
| 0.443503072 | 12.99370884 | 2.581504292 | 2.328665088 | 4.203582776 |
| 0.030173727 | 11.96614459 | 2.452564098 | 4.145735191 | 2.454349274 |
| 1.3274534   | 10.22919691 | 4.793439217 | 3.0402576   | 4.187609251 |
| 0           | 12.72429615 | 3.692278655 | 4.305425312 | 5.379958974 |
| 0.437027525 | 9.3918813   | 2.026708237 | 2.558792312 | 2.023348527 |
| 7.890552327 | 13.26674474 | 3.351389607 | 3.937566934 | 4.423749339 |
| 10.87272223 | 9.682770723 | 4.33507437  | 0.051152245 | 6.218091444 |
| 0.072854758 | 11.8789178  | 3.314461892 | 6.010928574 | 2.627295344 |
| 3.522149747 | 13.10794629 | 2.504713654 | 3.000702294 | 5.16429992  |
| 9.850208261 | 11.76978388 | 4.74141952  | 4.754086824 | 5.026581759 |
| 10.82529876 | 13.64816068 | 2.852434334 | 5.178500143 | 5.137472926 |
| 0.02904324  | 13.88107275 | 3.303643331 | 2.71582252  | 5.274598063 |
| 2.331020743 | 13.40438403 | 3.824563914 | 1.260750281 | 5.198787536 |
| 1.210599233 | 11.72088834 | 2.836702031 | 5.476766789 | 3.656064654 |
| 2.797481407 | 13.41586972 | 1.768772907 | 4.316260986 | 3.547451133 |
| 1.792311059 | 10.68319854 | 1.493017588 | 0           | 1.786514062 |
| 10.45795814 | 12.82799352 | 1.556447411 | 1.852487504 | 1.853760446 |
| 1.84653762  | 13.85047092 | 3.773475438 | 4.576036659 | 2.892581143 |
| 8.839950314 | 12.27775758 | 2.541743017 | 0           | 4.51970955  |
| 8.889349227 | 13.98447279 | 1.135037423 | 3.365389788 | 2.175486491 |
| 1.751812443 | 11.91179117 | 4.907514321 | 3.909262662 | 8.458177836 |
| 0.171997409 | 13.15901271 | 0.150443331 | 1.50385183  | 2.978855128 |
| 0.021188632 | 13.41698656 | 3.097776311 | 1.667900357 | 3.271116761 |
| 0.943409448 | 12.20168058 | 2.723033865 | 4.230566958 | 2.24059248  |
| 0.581471605 | 13.37148785 | 4.207062391 | 0           | 5.772805012 |
| 10.25799445 | 14.09845058 | 2.813069384 | 3.005877287 | 5.432631146 |
| 0.341382319 | 13.55742562 | 1.903085149 | 4.507061646 | 0.328371317 |
| 9.845460553 | 13.7338225  | 2.768008264 | 1.633714781 | 5.649420014 |
| 10.46987059 | 12.50669634 | 3.410572391 | 2.428306203 | 3.183284748 |
| 1.65085728  | 13.59828182 | 2.39719271  | 2.398039883 | 6.982663507 |
| 1.375799184 | 13.99484182 | 3.093411019 | 4.129512271 | 4.009420349 |
| 2.102363588 | 14.28271452 | 2.100301598 | 3.273774268 | 5.024157455 |
| 0.020251581 | 9.059389779 | 3.796632703 | 5.054899174 | 5.272548877 |
| 0.06384934  | 13.86570208 | 2.255964351 | 5.053362481 | 4.623426649 |
| 2.600395054 | 12.60321531 | 2.440293638 | 1.506048036 | 6.228371682 |
| 0           | 10.84017661 | 2.578575424 | 0           | 5.550216941 |
| 10.55974118 | 12.66528186 | 3.947823338 | 4.363271257 | 5.097014388 |
| 2.56620617  | 13.77172282 | 1.384958399 | 1.78096448  | 5.68418661  |
| 0.395284248 | 13.39397852 | 3.546050302 | 2.756381428 | 4.945026383 |
| 2.183233008 | 14.51733793 | 0.90000798  | 4.163847823 | 4.792278119 |
| 8.197829547 | 13.68843433 | 2.393274151 | 1.956171766 | 5.635846191 |
| 1.529845513 | 11.30508443 | 3.93007851  | 2.518925049 | 4.249077312 |
| 1.979209248 | 13.87720055 | 1.080834023 | 0           | 4.503009776 |
| 1.265337646 | 11.33010401 | 3.178336547 | 0.083079408 | 4.308414278 |
| 0.075897924 | 12.76875944 | 2.633400767 | 3.333172376 | 3.509295896 |
| 1.635636102 | 11.91202073 | 2.332071387 | 0.212560858 | 4.711909324 |
| 1.992891766 | 11.38260447 | 4.393062681 | 0.10804968  | 3.291199219 |
| 0           | 12.48648965 | 4.560367514 | 3.78781589  | 5.148681412 |
| 1.247712453 | 12.05132074 | 3.79159574  | 5.871907978 | 5.239862732 |
| 2.021887047 | 14.83957901 | 2.469197493 | 2.475907742 | 6.014658696 |
| 1.670552155 | 15.107924   | 2.370546692 | 2.846310437 | 4.399759945 |
| 2.004211938 | 10.25197943 | 4.499690114 | 1.35985309  | 0.115743017 |
| 0.113954155 | 14.15567867 | 1.991647603 | 1.345802111 | 5.153973991 |
| 2.787520335 | 9.911002264 | 3.817981528 | 2.675674129 | 6.318344764 |
| 7.464872077 | 13.76251569 | 1.412768954 | 5.346523113 | 4.993233464 |

| hsa-miR-3614-5p | hsa-miR-20a-5p | hsa-miR-369-5p | hsa-miR-184 | hsa-miR-581 |
|-----------------|----------------|----------------|-------------|-------------|
| 2.527129708     | 11.41039594    | 4.99378578     | 2.871236671 | 1.406673334 |
| 3.497919092     | 10.25854276    | 2.844681651    | 2.357320888 | 1.615389477 |
| 3.567017088     | 10.71224198    | 3.841150151    | 1.098204495 | 2.373768137 |
| 3.105961193     | 11.94473374    | 3.240493922    | 0           | 2.131074055 |
| 1.656276878     | 10.99183996    | 2.402785546    | 5.302347701 | 2.663238458 |
| 3.988851617     | 10.6612869     | 3.176998528    | 2.158726248 | 2.745747264 |
| 2.474477519     | 10.79279669    | 3.300329643    | 5.724523351 | 2.413568767 |
| 1.032402312     | 11.39733274    | 3.874582799    | 3.245113724 | 2.627238257 |
| 1.291365419     | 11.40770523    | 1.292142939    | 3.205325244 | 2.464373784 |
| 0               | 12.34333801    | 3.262587828    | 4.58603304  | 2.766829542 |
| 5.451259875     | 11.08321476    | 5.558336159    | 2.074259608 | 0.108574738 |
| 4.506884058     | 12.37937558    | 4.910094804    | 0.116865684 | 2.426214033 |
| 3.509074042     | 12.10707069    | 2.925903928    | 0           | 1.525629679 |
| 4.614282054     | 8.893027345    | 2.323789429    | 2.32174862  | 1.246401132 |
| 3.122375868     | 12.19459266    | 0.968241661    | 2.760767683 | 1.547008777 |
| 4.414350118     | 11.71141831    | 3.207283737    | 5.757365403 | 2.680345658 |
| 2.848234227     | 10.60956143    | 2.698896499    | 2.141679247 | 1.219273961 |
| 2.024228097     | 11.30588849    | 0              | 1.33065059  | 3.685795957 |
| 2.58755333      | 13.55738884    | 6.978880207    | 0.157615653 | 1.454480926 |
| 3.750780105     | 11.0386019     | 5.226686667    | 1.951365336 | 0.963441776 |
| 4.752874365     | 12.69357967    | 2.294032762    | 2.281363538 | 0.351884784 |
| 2.523184091     | 10.67498397    | 2.525916782    | 1.407953894 | 0.107866946 |
| 2.419085411     | 11.46131601    | 8.57465529     | 6.039036175 | 1.851343775 |
| 4.083038735     | 12.5552764     | 3.204297774    | 7.311008174 | 1.661648126 |
| 0.862266522     | 11.72710104    | 7.058902724    | 4.418789585 | 2.39307013  |
| 2.721429227     | 10.78414003    | 3.831054002    | 3.163543776 | 2.528975632 |
| 3.055593729     | 11.96605182    | 1.63128986     | 5.943620159 | 0.009598398 |
| 2.33292056      | 11.3282125     | 2.336369294    | 3.149818164 | 3.576239406 |
| 3.859305785     | 11.99754155    | 0.057449184    | 2.243061831 | 2.232338979 |
| 4.695561348     | 10.7751602     | 3.122579789    | 0.792289549 | 2.028365731 |
| 4.303806832     | 10.03731631    | 3.39675614     | 1.425128377 | 2.069325592 |
| 3.170838243     | 12.98122258    | 1.118751362    | 0.037036125 | 1.117331022 |
| 2.279141455     | 13.49865219    | 1.844606654    | 2.278178702 | 2.863746946 |
| 1.845402697     | 12.53890022    | 4.759831488    | 5.834997852 | 2.10817211  |
| 3.678043028     | 10.22049787    | 2.923351069    | 2.212803626 | 2.441266215 |
| 1.93787809      | 11.5920886     | 5.163709291    | 0           | 2.417951618 |
| 2.005412892     | 11.19079808    | 0.111486725    | 0.116295723 | 1.345906363 |
| 2.895883175     | 11.94938652    | 4.094292048    | 1.658990052 | 0.01558526  |
| 3.236749867     | 13.11241347    | 1.166016592    | 4.422199636 | 2.534218083 |
| 0.026504125     | 12.56597391    | 3.944626058    | 0.028149725 | 2.439880097 |
| 4.460376798     | 11.15227567    | 1.401052127    | 1.403389255 | 1.804650468 |
| 2.621310546     | 10.76535903    | 2.621479173    | 1.615795579 | 2.032537161 |
| 0.13729168      | 11.50367533    | 1.442964565    | 6.270111575 | 1.43019383  |
| 3.992583653     | 12.2135159     | 3.627585308    | 0.213944713 | 2.706841611 |
| 2.195653574     | 12.01792443    | 2.654142669    | 2.192411601 | 1.504058089 |
| 3.86674895      | 10.44077082    | 0.914941235    | 0           | 3.048379801 |
| 4.279748673     | 10.99843377    | 1.860639499    | 6.366084877 | 1.813876685 |
| 2.819533736     | 13.28063861    | 3.328329234    | 1.372902288 | 3.652786143 |
| 4.082373809     | 11.07299508    | 2.109209395    | 6.01565541  | 3.239902604 |
| 0.225088658     | 11.77822003    | 4.530289976    | 0.246029687 | 2.339033868 |
| 3.936998384     | 12.07496968    | 3.473557338    | 0.110803788 | 1.330963954 |
| 4.434972875     | 9.663095228    | 6.756323971    | 2.20664742  | 1.659678465 |
| 4.006576804     | 11.04197272    | 4.000237007    | 1.368680262 | 1.657984079 |
| 2.669820804     | 12.21048716    | 5.151111435    | 2.672101373 | 1.519831787 |
| 4.920564672     | 10.24357579    | 1.109398145    | 10.36247475 | 1.713101755 |
| 4.395555025     | 12.10419548    | 3.34820481     | 0           | 0           |



|             |             |             |             |             |
|-------------|-------------|-------------|-------------|-------------|
| 3.683494368 | 11.16030249 | 2.811540872 | 3.692807468 | 2.003232778 |
| 4.176011659 | 11.09594394 | 4.220454911 | 7.811377082 | 1.794525359 |
| 3.73689916  | 11.17047425 | 4.124709129 | 1.02368995  | 1.613531232 |
| 3.678499496 | 10.38876897 | 1.661022257 | 2.897713935 | 2.403718097 |
| 4.827244477 | 10.42162345 | 3.088685539 | 4.275828486 | 1.34417743  |
| 0.09076663  | 11.62698704 | 7.468756808 | 1.939100717 | 2.362628847 |
| 2.842084823 | 11.50978706 | 0.007094285 | 0.007336906 | 2.353570439 |
| 2.851425086 | 10.66556065 | 6.167731639 | 0.638387464 | 2.249028035 |
| 3.295109774 | 11.9097052  | 3.831826707 | 7.332360422 | 2.440010916 |
| 3.32395718  | 11.32414662 | 4.461553068 | 0.000411754 | 2.323721524 |
| 4.04136477  | 10.82037541 | 3.286937267 | 1.520691777 | 2.170357888 |
| 0.904355212 | 12.72692188 | 1.871916855 | 0.906397586 | 0.905079062 |
| 4.487299003 | 10.6376772  | 3.69804795  | 1.663793236 | 1.645596362 |
| 4.028463238 | 11.60060005 | 2.601301796 | 1.815824846 | 1.819804773 |
| 4.066025724 | 10.06694033 | 4.751644322 | 3.802091072 | 1.914168946 |
| 3.202401793 | 12.19692884 | 2.184524213 | 3.008788632 | 2.175710195 |
| 5.229619322 | 11.54120889 | 2.529866949 | 1.150211261 | 3.203922697 |
| 2.92014168  | 14.72851757 | 3.561356437 | 8.774072478 | 2.396644404 |
| 3.039663642 | 12.39603614 | 3.411085123 | 1.363548373 | 0           |
| 2.056983761 | 13.43965948 | 2.527165081 | 2.312328828 | 2.066350091 |
| 3.879926541 | 9.114789392 | 1.73149799  | 0.037807035 | 0.030787211 |
| 0.184370791 | 13.57034152 | 1.581532894 | 0.200322599 | 2.223698663 |
| 3.250350149 | 12.01826105 | 3.030557994 | 4.902871891 | 2.803188926 |
| 1.802049902 | 13.54144012 | 0.054907056 | 3.259335395 | 2.551887658 |
| 3.271838259 | 11.57330315 | 3.000915254 | 0.177818725 | 1.505230351 |
| 0.981535493 | 12.69127172 | 1.975517574 | 1.975727845 | 2.782001957 |
| 2.782101933 | 11.82957867 | 2.429115936 | 3.500611538 | 2.950169574 |
| 1.671560222 | 11.38457973 | 3.808225189 | 0.021998358 | 2.414881862 |
| 2.435728002 | 9.34299996  | 4.917743074 | 2.985844148 | 1.781189433 |
| 2.698089608 | 12.97111407 | 5.371575113 | 6.594624642 | 2.305629004 |
| 2.489155385 | 12.87339036 | 4.360389027 | 5.784878773 | 0.100327789 |
| 5.019326797 | 12.08902739 | 0.656407203 | 2.892144763 | 2.076409984 |
| 3.772929993 | 12.81212586 | 0.334136908 | 1.940811995 | 2.583391109 |
| 3.809603717 | 11.47966639 | 3.461671593 | 1.001448899 | 2.001881379 |
| 1.774026598 | 11.32391837 | 2.480917021 | 0.277859597 | 2.414489051 |
| 2.746515424 | 10.54677585 | 3.812973802 | 7.974293454 | 0.159074059 |
| 2.810804245 | 11.20940004 | 2.809840258 | 0.876936113 | 1.836254881 |
| 3.394509027 | 10.28015548 | 3.881986523 | 8.391710021 | 1.642777736 |
| 2.848697691 | 11.72600154 | 5.900208322 | 2.846901787 | 0.704681302 |
| 1.049563285 | 10.47583442 | 5.174175361 | 4.201119195 | 2.504538248 |
| 3.679149004 | 11.69072786 | 3.578496534 | 3.855050745 | 2.602696181 |
| 2.372075116 | 10.42393113 | 4.749653185 | 5.833337032 | 1.284900841 |
| 2.280437648 | 11.90252992 | 1.54851627  | 2.280567365 | 2.282249461 |
| 1.071445869 | 11.50161743 | 5.503159656 | 1.06993692  | 3.906340844 |
| 3.265852072 | 10.02501254 | 2.481890617 | 1.551426573 | 1.178566568 |
| 0.824137283 | 10.27657395 | 5.639280599 | 3.88370933  | 1.37143884  |
| 3.889912753 | 13.03422079 | 7.383208299 | 2.569140758 | 1.985843853 |
| 3.168987928 | 10.5106549  | 3.16644352  | 4.149003406 | 3.191301592 |
| 0           | 12.50355    | 2.177989626 | 2.182139129 | 1.820329788 |
| 0.801651437 | 10.38554771 | 4.362036092 | 1.612833545 | 2.538328984 |
| 2.376565062 | 10.91998493 | 3.645042811 | 1.038963139 | 3.224683216 |
| 3.677927585 | 9.409613695 | 1.325155672 | 5.575458008 | 2.06327503  |
| 4.268898493 | 11.41366898 | 7.022949755 | 2.819094591 | 0.880888127 |
| 0.88792205  | 11.2230438  | 7.630764203 | 1.449111218 | 2.429806904 |
| 4.755945126 | 9.157167574 | 4.9757424   | 0           | 2.282342367 |
| 1.646085248 | 11.92759001 | 3.776707353 | 4.400303913 | 2.652132022 |
| 3.706869048 | 11.43720979 | 6.603538808 | 0.0253435   | 2.428527591 |
| 1.719029005 | 10.83076594 | 4.244767396 | 1.332518501 | 2.036576897 |

|             |             |             |             |             |
|-------------|-------------|-------------|-------------|-------------|
| 3.349931313 | 10.92771196 | 3.009672343 | 3.653522305 | 0.22057535  |
| 5.178121014 | 8.728559764 | 5.134998366 | 2.326421766 | 0.691773689 |
| 2.709222527 | 12.57832701 | 2.707930192 | 0.813553329 | 2.315984215 |
| 2.96722763  | 10.75986177 | 3.124912098 | 1.185785498 | 2.361882071 |
| 3.463719643 | 11.20527323 | 2.454360583 | 6.960819797 | 2.121065812 |
| 3.793556107 | 11.63109444 | 1.984776325 | 7.404076387 | 2.403635144 |
| 3.819488591 | 10.43528823 | 3.273805637 | 1.120805789 | 1.487903609 |
| 2.022652705 | 10.96444045 | 5.823572485 | 3.817728132 | 2.048783341 |
| 1.02012054  | 11.35515977 | 4.118452839 | 1.019692964 | 2.3483453   |
| 3.047716994 | 12.90258744 | 0.051870258 | 4.06354654  | 2.807202472 |
| 1.227284952 | 12.13924879 | 6.627453031 | 1.853681966 | 1.845955754 |
| 3.901262953 | 11.22453415 | 1.749233923 | 5.165461162 | 2.496896804 |
| 1.938292387 | 10.80604985 | 5.483476946 | 0.096068167 | 1.923258041 |
| 4.572149061 | 11.24674708 | 1.031587568 | 7.510463891 | 1.622371341 |
| 5.60150599  | 10.13212283 | 3.306742245 | 7.337924155 | 2.708171477 |
| 5.335947607 | 11.72686137 | 4.706732824 | 1.892916401 | 1.883357013 |
| 2.684797888 | 10.45893707 | 4.067493534 | 3.197132586 | 2.354400973 |
| 6.063749454 | 10.48317797 | 2.530257579 | 6.193685856 | 1.763198947 |
| 2.860743562 | 9.888341611 | 3.382567089 | 2.726782378 | 0           |
| 2.657858278 | 11.8108731  | 1.852598457 | 1.560644582 | 1.56505283  |
| 1.851242514 | 9.946412934 | 1.222016867 | 9.290066937 | 2.272115817 |
| 6.534146092 | 10.11220537 | 3.243838751 | 9.204568882 | 1.464404501 |
| 3.517895987 | 11.20880548 | 3.901215363 | 0.042077141 | 2.494984973 |
| 3.201702039 | 12.59286643 | 1.754967338 | 0.044117977 | 3.188418431 |
| 3.852970589 | 12.07155064 | 7.243890862 | 3.867877001 | 2.143325995 |
| 3.560794567 | 11.20873072 | 5.721218531 | 0.021046154 | 2.086004306 |
| 4.862509564 | 9.363140179 | 1.922364972 | 0.942987077 | 2.244129937 |
| 2.123477106 | 10.76738829 | 2.301833439 | 6.59486688  | 1.693987394 |
| 1.589830064 | 11.81347048 | 3.005895234 | 5.254316953 | 2.590347233 |
| 0.305015563 | 11.58582336 | 0.317849118 | 0.337378765 | 1.86072709  |
| 3.637438182 | 11.25394461 | 1.633093717 | 6.400849604 | 4.087853501 |
| 1.275245728 | 11.79116468 | 2.778985973 | 2.61503949  | 1.975158192 |
| 4.171305599 | 11.75157918 | 2.398151304 | 1.054298399 | 1.650156715 |
| 3.703472407 | 12.95104844 | 2.830939926 | 3.338474367 | 2.794075921 |
| 3.781210199 | 10.93889874 | 2.49096781  | 1.559067336 | 3.084748045 |
| 3.265669136 | 12.60243425 | 3.095511343 | 2.411398547 | 2.895517733 |
| 5.203623088 | 8.588735707 | 2.861971105 | 7.091928747 | 1.815914594 |
| 2.253295234 | 11.97853943 | 2.59663977  | 1.14502197  | 0.645071383 |
| 3.082880445 | 10.32723927 | 4.6541995   | 7.270598267 | 1.397626266 |
| 2.897530646 | 13.43709217 | 3.420656452 | 6.033163694 | 2.477085102 |
| 4.062261704 | 9.238618505 | 3.205307579 | 0.84142199  | 1.388628643 |
| 3.223692001 | 12.71659788 | 3.595359536 | 2.018233394 | 3.109625666 |
| 0.900232698 | 8.425987068 | 4.425203252 | 1.464158047 | 0           |
| 4.144730382 | 13.02433502 | 2.736877366 | 3.61358016  | 2.375762682 |
| 2.931899196 | 11.92478279 | 3.389086512 | 6.666208332 | 1.530096842 |
| 3.772640812 | 9.267826993 | 4.81863782  | 1.976304165 | 1.45196775  |
| 4.300043861 | 10.56296235 | 1.272221585 | 1.906937853 | 1.896676996 |
| 1.236296349 | 10.60147315 | 1.235484769 | 0.075323199 | 3.633056582 |
| 2.341160743 | 12.03834461 | 3.436937112 | 0.227946944 | 1.625103012 |
| 1.999457881 | 11.28141537 | 7.256051972 | 2.443334326 | 3.445422865 |
| 3.789106395 | 11.79031266 | 3.607733879 | 8.716768978 | 0           |
| 3.881161925 | 11.62468581 | 2.403660652 | 3.716372628 | 0.901961086 |
| 4.111667965 | 11.8815213  | 2.817156609 | 2.474491169 | 1.36527303  |
| 3.702350083 | 14.26227503 | 3.199370291 | 0.242257515 | 2.329837989 |
| 2.010893412 | 11.28716238 | 3.071936059 | 1.353106992 | 0.093000405 |
| 4.580591322 | 9.933486312 | 3.053802643 | 1.339294284 | 1.337019418 |
| 2.984011688 | 12.09586198 | 5.594400878 | 11.93278692 | 1.540707433 |
| 3.366198817 | 12.48673322 | 2.07363275  | 1.405985121 | 2.048754649 |

| hsa-miR-3923 | hsa-miR-17-5p | hsa-miR-4664-3p | hsa-miR-34c-3p | hsa-miR-4326 |
|--------------|---------------|-----------------|----------------|--------------|
| 0.138782949  | 11.40711782   | 0.095389509     | 2.861276754    | 3.580125743  |
| 1.025276284  | 10.46596666   | 0.005813068     | 2.033778961    | 3.739795539  |
| 0.385905647  | 11.48934449   | 0.377061012     | 2.567773814    | 4.36623523   |
| 2.380705283  | 12.31729982   | 2.809072104     | 3.108084215    | 4.677447593  |
| 0.018012727  | 11.1547753    | 0.013286739     | 3.787247629    | 3.89696848   |
| 0.038058234  | 10.61991493   | 0.027733909     | 0.034790118    | 2.756716145  |
| 0.276644238  | 10.81709391   | 2.36038316      | 2.926204146    | 4.360933073  |
| 0.57357307   | 11.81691319   | 2.508759933     | 4.148359779    | 4.829675042  |
| 1.29554765   | 11.56440733   | 2.006458485     | 0              | 4.923742819  |
| 1.634662594  | 12.96792953   | 1.651732759     | 1.249358099    | 5.095460423  |
| 0.138552286  | 11.35518052   | 0.095243283     | 1.417702755    | 4.997780145  |
| 0.116602408  | 12.27854678   | 0.081154565     | 2.004715157    | 5.332062999  |
| 0.951234338  | 11.87967619   | 0.951926722     | 0              | 4.169390813  |
| 9.914372047  | 9.711438683   | 2.289991046     | 0.07290398     | 4.543274317  |
| 0            | 12.08486654   | 1.548364908     | 1.957853916    | 4.271677712  |
| 0.092695506  | 11.73232529   | 2.329216607     | 0.083858843    | 3.579957378  |
| 7.975906099  | 10.74850451   | 1.22862061      | 1.214149949    | 4.196967483  |
| 0            | 11.72600707   | 2.045820867     | 1.717662897    | 7.082713956  |
| 0.157232977  | 13.70897992   | 2.079238023     | 0.140525628    | 4.669097703  |
| 0.963815226  | 11.02339788   | 1.954728203     | 0.963017233    | 3.40295369   |
| 0.514470105  | 12.33576763   | 2.102297379     | 2.269190919    | 3.048237606  |
| 0.137597713  | 10.93921165   | 0.094637747     | 4.573119347    | 5.126634854  |
| 4.137559565  | 11.30188175   | 1.451749998     | 0              | 4.672252703  |
| 0.243253733  | 12.73948415   | 1.627806132     | 0.213956373    | 0.236280798  |
| 1.41743075   | 12.14953325   | 0               | 0              | 4.236234134  |
| 1.213103471  | 11.19012266   | 1.228269473     | 1.473496892    | 3.503250303  |
| 0.011638528  | 12.8390534    | 3.634916804     | 1.63121249     | 6.037676562  |
| 0.224375424  | 10.94390249   | 1.587651873     | 3.83538038     | 1.642504887  |
| 0.059540352  | 12.3650271    | 1.79362152      | 1.189158073    | 5.193964021  |
| 12.1025164   | 11.26045825   | 1.333410765     | 1.321502471    | 5.286890609  |
| 1.425873724  | 10.47599744   | 1.402481569     | 3.382210595    | 4.620764252  |
| 1.116922     | 13.6380882    | 1.113733925     | 1.119317889    | 5.739245506  |
| 0.068750771  | 13.23486422   | 0.049193628     | 0.062480098    | 4.717533743  |
| 1.181897     | 12.6645298    | 0.679657864     | 3.169320936    | 3.361571571  |
| 0.754243172  | 10.57015681   | 1.285654541     | 1.65741805     | 3.974441468  |
| 0            | 12.64653184   | 1.656057841     | 1.939298954    | 3.371837987  |
| 0.116034016  | 10.64557192   | 0.080785101     | 2.445925768    | 0.113344933  |
| 1.060700595  | 12.31117904   | 1.05932482      | 2.405989254    | 6.141748057  |
| 0.052207244  | 13.08220976   | 0.037723778     | 2.214162535    | 4.337906344  |
| 0.028096993  | 12.12123718   | 1.087174428     | 2.118377061    | 3.45707922   |
| 5.423745618  | 10.88797609   | 0               | 0.85031782     | 0            |
| 5.398479825  | 11.55839014   | 1.024711482     | 2.357057425    | 4.499540413  |
| 5.291880524  | 11.76648491   | 1.411984941     | 2.103156343    | 5.03197628   |
| 1.60781037   | 11.64735898   | 1.5637083       | 0.188715506    | 3.83309964   |
| 3.715257523  | 12.73062502   | 2.569665683     | 0.157522415    | 5.959071046  |
| 5.717703259  | 10.77131085   | 0.917207164     | 1.886202646    | 1.885873016  |
| 0.313402795  | 10.64362921   | 0.196365263     | 3.368856528    | 4.130386964  |
| 1.37354955   | 13.40376773   | 0.086481076     | 0.112253334    | 4.549352528  |
| 2.772269678  | 11.27298115   | 1.409218342     | 2.367428888    | 3.667052003  |
| 0.245338379  | 11.30388051   | 0.159174846     | 1.69370527     | 0.23828363   |
| 1.333650737  | 12.44641942   | 2.715520893     | 1.33936928     | 4.665895553  |
| 1.956562567  | 10.12563785   | 0               | 0.744619729    | 2.91607325   |
| 1.018495014  | 11.40606242   | 1.921657476     | 1.88252883     | 4.67228463   |
| 2.212319827  | 12.1478753    | 0.122911589     | 0.163004615    | 6.019850411  |
| 0.033985198  | 10.48996494   | 0.024826648     | 1.717008291    | 2.964428577  |
| 0.785372955  | 12.25374295   | 0               | 0.780444398    | 4.097004419  |

|             |             |             |             |             |
|-------------|-------------|-------------|-------------|-------------|
| 2.811204522 | 11.04504639 | 0.084406879 | 1.370657123 | 4.442718835 |
| 0.640174223 | 11.74447559 | 0           | 3.703637925 | 5.233790252 |
| 1.614022237 | 11.97737464 | 2.02927295  | 1.024238047 | 4.124891699 |
| 2.673521804 | 10.63439541 | 0.014187755 | 2.672454651 | 3.902957802 |
| 0           | 10.48975891 | 2.101610619 | 3.099288347 | 3.55676784  |
| 0.097080239 | 11.76467662 | 2.673543862 | 1.94048215  | 5.201285868 |
| 0.007323813 | 12.01246961 | 2.838357379 | 1.614196235 | 4.895864856 |
| 1.490270289 | 11.33176076 | 1.134263209 | 2.022457244 | 4.707672982 |
| 2.609860372 | 11.58078502 | 0           | 0.747781598 | 0.750926861 |
| 0.000411031 | 11.32977119 | 0.000306487 | 1.586615038 | 4.089577005 |
| 0.179860858 | 11.42592076 | 3.181338095 | 0.160070685 | 3.01085784  |
| 2.85629502  | 12.81055579 | 0.907281114 | 0           | 4.932432667 |
| 0.236215339 | 11.02317183 | 0.153991195 | 1.671400524 | 5.80215226  |
| 1.417047204 | 11.67793246 | 2.62132193  | 1.414911687 | 4.360633431 |
| 0           | 10.30419485 | 0.93549934  | 2.229393504 | 5.384114853 |
| 0.044193976 | 12.79678337 | 3.348470082 | 1.754965105 | 5.973761462 |
| 0.047918093 | 11.48159943 | 1.145931552 | 1.768627616 | 2.798799325 |
| 0.269400774 | 14.60867938 | 0.172615941 | 0.235815342 | 5.56663326  |
| 0           | 12.56165492 | 1.370943047 | 2.892581199 | 6.310388778 |
| 6.729101269 | 12.71314454 | 0           | 1.748608808 | 3.78561016  |
| 0.037734654 | 10.16607276 | 2.959597515 | 1.731036021 | 5.773301424 |
| 0.199799352 | 13.07057219 | 0.13280066  | 0.177156264 | 5.067665488 |
| 1.168791487 | 12.5106552  | 1.177493678 | 1.162224174 | 5.085550154 |
| 1.177589072 | 13.57263481 | 2.539409585 | 2.563105496 | 3.85209194  |
| 2.194647424 | 11.56356316 | 0.11933656  | 0.157928593 | 3.714912889 |
| 0.981900989 | 12.78292468 | 1.563833474 | 0           | 4.877586361 |
| 0.757189627 | 11.98174824 | 2.818279153 | 2.619558662 | 5.899108331 |
| 2.093223484 | 11.89131091 | 2.410200999 | 1.07164565  | 4.634215591 |
| 0           | 10.07516049 | 1.805344738 | 3.923608905 | 5.349148762 |
| 0           | 13.41532231 | 1.351516628 | 1.732472624 | 4.427860843 |
| 0.127473784 | 13.31553181 | 2.434097882 | 2.039587353 | 4.955985099 |
| 0           | 11.96914548 | 0.659835762 | 4.872792969 | 5.945751513 |
| 0.353997031 | 12.52216489 | 2.513862031 | 0.305111696 | 4.036840274 |
| 1.001451166 | 11.55796189 | 1.001425051 | 2.809475719 | 4.394635312 |
| 0.277040428 | 11.2620388  | 0.176814933 | 1.769548745 | 4.633398603 |
| 0.208536822 | 10.62472065 | 0.137959372 | 3.081290321 | 4.750168078 |
| 1.432167398 | 11.60135238 | 0           | 1.430258545 | 3.127350329 |
| 12.91793684 | 10.96877863 | 1.640533526 | 2.064180288 | 3.659290794 |
| 0           | 12.24045867 | 4.515806599 | 1.214497257 | 3.8931129   |
| 0           | 11.09168177 | 1.064951856 | 2.626940159 | 2.870341178 |
| 1.409332552 | 11.89994441 | 0           | 2.951495615 | 4.225189159 |
| 0.093955254 | 10.47323402 | 1.274404436 | 2.975566562 | 3.740005718 |
| 0           | 11.37242284 | 0.971153703 | 1.960517993 | 2.28033464  |
| 1.070049005 | 12.12136368 | 0.016130057 | 0.020099347 | 4.196864124 |
| 2.091039955 | 11.01418785 | 2.976268562 | 2.93104754  | 4.342316637 |
| 0           | 10.51544812 | 0           | 1.367466134 | 5.10017238  |
| 7.618583348 | 13.20356036 | 1.57226269  | 2.98383839  | 5.889126875 |
| 0.7462101   | 10.36875349 | 2.228026395 | 0           | 4.420980573 |
| 4.294082483 | 12.77376865 | 0.507353193 | 1.569467665 | 5.468263621 |
| 0           | 10.74273861 | 2.687789744 | 1.799279332 | 4.913900998 |
| 0.012128395 | 11.79141778 | 2.371414878 | 2.052047413 | 4.705955905 |
| 0           | 9.955789015 | 0           | 7.47868544  | 3.162408514 |
| 1.840206097 | 11.48368226 | 0           | 2.412085749 | 4.329826239 |
| 0           | 11.82432056 | 4.09313267  | 3.152278228 | 5.985918223 |
| 2.607481124 | 9.881053283 | 1.537875075 | 0.649611978 | 4.479020626 |
| 0.015398777 | 12.05967103 | 1.048358471 | 3.242964613 | 0.015108979 |
| 0.025296329 | 11.72698236 | 1.078693848 | 2.106917242 | 5.172240423 |
| 0           | 11.48577892 | 2.523014574 | 2.027738078 | 3.571898009 |

|             |             |             |             |             |
|-------------|-------------|-------------|-------------|-------------|
| 0.299063552 | 10.96401482 | 0.188740298 | 2.984433587 | 3.88741027  |
| 0           | 9.049651402 | 0           | 3.673536613 | 3.561513221 |
| 0.813283932 | 12.53303018 | 0           | 1.742212359 | 4.49217868  |
| 1.184948198 | 11.03361727 | 1.913702824 | 4.333734683 | 4.204804803 |
| 0.029910265 | 11.18472227 | 1.693653554 | 1.097034412 | 4.235149529 |
| 7.236383789 | 12.04242865 | 0.076570559 | 3.032807457 | 5.991631706 |
| 0.633561749 | 10.77296935 | 1.502542652 | 2.847966219 | 4.154770912 |
| 1.17452282  | 11.36774336 | 0.425923999 | 0.837721053 | 3.1084941   |
| 4.201259911 | 11.37418744 | 0.004535405 | 2.613188939 | 5.704307754 |
| 1.16807535  | 13.29606944 | 3.019007309 | 2.550540103 | 6.60318877  |
| 8.453981178 | 12.45701747 | 0.051527936 | 1.855266795 | 6.685183487 |
| 3.522904143 | 11.07641139 | 1.736967158 | 1.748671206 | 4.205879122 |
| 0.09586031  | 11.37589285 | 1.907012811 | 1.29712258  | 5.936106331 |
| 4.04902869  | 10.93783054 | 0.007154147 | 4.571374556 | 3.507306034 |
| 2.941049455 | 10.37194009 | 1.089266838 | 1.697402274 | 4.728849295 |
| 0.083482868 | 11.78479441 | 1.246111441 | 0.075656455 | 4.473010285 |
| 1.207813809 | 10.79929429 | 2.373268693 | 3.49992767  | 5.470358849 |
| 3.02538251  | 10.76499233 | 2.998083126 | 2.795481937 | 0.047041667 |
| 0           | 10.22573287 | 0.641090791 | 2.586072131 | 4.223364853 |
| 1.187887764 | 11.75270946 | 4.377210695 | 2.10153669  | 4.765968663 |
| 0.070663361 | 10.27729755 | 1.829359034 | 1.222780567 | 0.069164357 |
| 7.934415618 | 11.07202552 | 2.237382978 | 3.978134323 | 4.951373084 |
| 0.041995818 | 11.35010309 | 0.030531006 | 1.746855154 | 4.00980688  |
| 1.138615373 | 12.97968851 | 2.493325648 | 0.040205246 | 4.800592798 |
| 2.172431252 | 12.11698222 | 1.46520275  | 0.151586251 | 0.165678263 |
| 6.795487504 | 11.13379415 | 1.065618785 | 0.019266293 | 4.964544479 |
| 0           | 9.903675469 | 0.943675422 | 1.513781112 | 4.077975524 |
| 0           | 11.13000783 | 0           | 1.394278378 | 5.804770356 |
| 7.441095857 | 11.58441887 | 1.003849102 | 1.00400552  | 5.093791518 |
| 0.336296457 | 11.80862028 | 1.810222334 | 1.904857637 | 3.467977271 |
| 0.21988326  | 11.3429518  | 0.14458772  | 0.194238558 | 4.970721502 |
| 4.38786086  | 12.72163292 | 3.448509905 | 1.27523947  | 5.037726287 |
| 0.016959407 | 11.8379699  | 1.647610474 | 3.079564896 | 4.671119413 |
| 0.127095    | 13.41906624 | 0.08793258  | 1.385974346 | 5.086906742 |
| 3.701482719 | 10.78866518 | 0.683254927 | 1.180267802 | 3.544872458 |
| 12.1220952  | 12.63500703 | 1.062773619 | 2.676129436 | 5.857703179 |
| 0.063249528 | 9.126609298 | 1.189916378 | 3.279444464 | 3.459113008 |
| 0           | 12.36240412 | 2.080570962 | 1.137430163 | 5.523613737 |
| 0           | 10.81035223 | 0           | 4.147733395 | 5.498473104 |
| 1.158747476 | 13.6112146  | 0           | 2.901963303 | 4.858680848 |
| 11.50480046 | 9.737424263 | 0           | 2.567034875 | 4.59170156  |
| 0.388967545 | 12.82013271 | 0.234833834 | 0.333135503 | 4.330871612 |
| 9.722987606 | 9.01580596  | 0.903256756 | 1.866875172 | 3.429335907 |
| 0.101045739 | 12.68456708 | 1.922455662 | 1.312119686 | 4.544796989 |
| 0           | 12.06745992 | 1.943432599 | 2.519569822 | 0.954390165 |
| 0           | 9.491331511 | 1.467091648 | 4.071678062 | 4.2052264   |
| 2.685779227 | 10.76296159 | 0.061980965 | 2.346198281 | 5.162119394 |
| 0.075166918 | 11.07234178 | 0.053582379 | 1.236251009 | 5.213201093 |
| 2.340184559 | 12.70562732 | 0.148891921 | 0.20053519  | 4.70927162  |
| 1.996510883 | 11.83964237 | 1.32768382  | 1.349768385 | 6.219168479 |
| 0.817678301 | 11.75793399 | 0           | 4.788348941 | 6.317182901 |
| 0.909827943 | 12.01468653 | 2.602660244 | 2.26886582  | 5.332948317 |
| 0.123200639 | 11.86842494 | 1.350710803 | 2.470216819 | 4.121718749 |
| 0.24158077  | 13.84251813 | 2.727339594 | 3.686168289 | 1.685661178 |
| 4.525239694 | 12.03193665 | 0.081874161 | 1.359647294 | 7.191955165 |
| 1.991762672 | 10.16834282 | 0.078659575 | 1.992275357 | 4.19911442  |
| 0.488285703 | 12.33961132 | 2.34847134  | 0.914397205 | 4.036845396 |
| 2.521622864 | 12.85469297 | 2.793643982 | 2.069253136 | 4.683324187 |

| hsa-miR-214-3p | hsa-miR-552-5p | hsa-miR-122-3p | hsa-miR-199b-3p | hsa-miR-199a-3p |
|----------------|----------------|----------------|-----------------|-----------------|
| 4.842981521    | 3.912239772    | 7.787298883    | 14.07837496     | 14.08159838     |
| 1.61628408     | 1.615742134    | 9.89352827     | 9.582878289     | 9.592528736     |
| 4.081131404    | 0.788199676    | 8.254687237    | 12.35104073     | 12.35381826     |
| 2.955193793    | 6.06913442     | 9.255062656    | 12.90712192     | 12.90903289     |
| 1.656285009    | 2.891819288    | 7.70914904     | 11.20001004     | 11.20719592     |
| 4.271172973    | 1.119490186    | 9.486864572    | 13.51669938     | 13.5195145      |
| 0.257107987    | 4.510432553    | 11.23977895    | 9.370182695     | 9.370182539     |
| 4.136706745    | 1.396205155    | 6.892097583    | 12.90205806     | 12.90604321     |
| 1.291596774    | 1.986030209    | 9.414432813    | 9.857684121     | 9.860023796     |
| 3.466883776    | 7.740232194    | 8.271527605    | 11.55050985     | 11.55812431     |
| 4.916742664    | 2.868680986    | 10.39670695    | 13.58438745     | 13.60136327     |
| 4.510231601    | 3.828968219    | 9.822349115    | 13.20884953     | 13.23130683     |
| 3.623913936    | 0              | 10.04978042    | 11.73844351     | 11.74163086     |
| 3.527150518    | 1.880974934    | 7.797795219    | 11.55532156     | 11.56346421     |
| 0              | 1.958148034    | 10.24679882    | 7.287651306     | 7.296527865     |
| 2.704663864    | 1.28083445     | 10.0123594     | 11.13893326     | 11.13980281     |
| 3.103191419    | 8.48106959     | 8.88060186     | 11.76639622     | 11.77243517     |
| 0              | 3.252907038    | 9.751959394    | 6.699471292     | 6.720968275     |
| 0.147956571    | 0.158588845    | 8.205813207    | 7.410453896     | 7.424168358     |
| 5.433486296    | 0.964041344    | 9.555851299    | 13.65969748     | 13.66630897     |
| 2.290352103    | 5.69772313     | 11.01242145    | 11.69481199     | 11.69627155     |
| 3.570006929    | 0.138742504    | 3.373806559    | 11.60329129     | 11.63232658     |
| 0              | 3.817817813    | 10.27369726    | 8.41199791      | 8.411997961     |
| 3.199555787    | 3.725042821    | 9.513477388    | 12.72465829     | 12.72763851     |
| 3.109378692    | 3.108922974    | 8.680702948    | 11.19583646     | 11.20106146     |
| 5.368389694    | 0              | 8.518077114    | 13.54275506     | 13.5449954      |
| 2.374488864    | 4.867536069    | 7.992359643    | 11.05118005     | 11.05472395     |
| 2.334853964    | 7.560670058    | 10.27605738    | 10.03448898     | 10.03448902     |
| 1.811729948    | 3.26998072     | 11.17105292    | 8.115581429     | 8.1283006       |
| 2.017786197    | 0              | 10.19290685    | 12.28170808     | 12.28619805     |
| 2.887303681    | 1.422770073    | 8.938557708    | 11.57966057     | 11.58630144     |
| 1.11907535     | 1.116145461    | 8.577091113    | 8.413033129     | 8.413033072     |
| 3.110660023    | 1.840598947    | 10.0589414     | 10.29653749     | 10.30377019     |
| 4.994483557    | 5.635549006    | 10.06050502    | 13.02733566     | 13.03125765     |
| 4.044510927    | 1.66156046     | 10.10826511    | 13.07820484     | 13.07943637     |
| 0.734978179    | 2.190798162    | 8.535827219    | 8.139708129     | 8.143409374     |
| 0.109659383    | 5.659610903    | 10.44480081    | 8.913989305     | 8.918331288     |
| 4.795366438    | 2.671878877    | 9.276894016    | 12.67371849     | 12.69182161     |
| 2.815760459    | 2.545807386    | 9.082019212    | 11.14711        | 11.15091989     |
| 5.348990931    | 4.139140143    | 9.383986435    | 12.15662666     | 12.16255735     |
| 1.798506012    | 0.85451379     | 10.69706458    | 9.553026327     | 9.556246121     |
| 3.037630492    | 7.211407938    | 9.759347268    | 11.55691244     | 11.5578979      |
| 3.407169703    | 2.555456378    | 10.76208548    | 10.13989569     | 10.14192133     |
| 2.303647916    | 6.672258354    | 10.23681997    | 11.32516491     | 11.33978341     |
| 0.166121888    | 5.615097385    | 8.571431772    | 8.026988142     | 8.036406635     |
| 3.191581778    | 1.482026143    | 9.463262318    | 11.3439879      | 11.34850638     |
| 1.86052808     | 10.00586704    | 9.2742641      | 9.799542158     | 9.803298435     |
| 3.095624814    | 0.125851639    | 9.375320485    | 12.36718381     | 12.37286905     |
| 1.797619012    | 9.668352481    | 9.209771061    | 10.68633797     | 10.69146782     |
| 5.70584516     | 6.034109068    | 11.71866674    | 13.53258404     | 13.53649188     |
| 3.47107671     | 5.46132097     | 9.420739073    | 12.3025728      | 12.30869247     |
| 5.979606908    | 0.751767181    | 9.943930501    | 13.9403592      | 13.94204405     |
| 5.018783225    | 3.212609184    | 8.534310938    | 13.93692297     | 13.94260789     |
| 5.211500263    | 4.069806928    | 7.129699463    | 13.66167594     | 13.67724241     |
| 0.032395856    | 4.49058015     | 9.99331061     | 9.87693825      | 9.887293621     |
| 4.224969975    | 0              | 10.00584949    | 12.08872748     | 12.09406912     |

|             |             |             |             |             |
|-------------|-------------|-------------|-------------|-------------|
| 3.08406996  | 8.449010537 | 10.57035294 | 11.13210975 | 11.13873957 |
| 5.191669338 | 2.723046609 | 8.052031612 | 13.53487055 | 13.53694066 |
| 3.943749224 | 0.007395727 | 8.683054806 | 12.10131219 | 12.10232403 |
| 1.661087677 | 3.679779223 | 10.5635312  | 8.275782906 | 8.285734366 |
| 5.103473771 | 0.542494393 | 7.936704988 | 13.62388882 | 13.62649601 |
| 0.091929135 | 3.224244148 | 10.58398249 | 8.355152531 | 8.355152371 |
| 3.205587382 | 0.007370122 | 8.578218245 | 10.86408232 | 10.88382955 |
| 1.776753717 | 0.639807217 | 8.401581668 | 8.638673532 | 8.643221443 |
| 3.496961102 | 3.671995874 | 10.43597536 | 11.15449183 | 11.17074509 |
| 4.394423015 | 1.586589636 | 9.552963379 | 12.61301303 | 12.63112002 |
| 1.530054043 | 0.181474916 | 9.513331773 | 10.80797424 | 10.81074161 |
| 2.856633777 | 3.550712749 | 8.832030002 | 11.52503528 | 11.54591853 |
| 3.892485834 | 1.659900708 | 9.548550605 | 11.51242919 | 11.53173418 |
| 3.949885566 | 4.168349776 | 9.248956404 | 12.39032285 | 12.39534395 |
| 5.141879898 | 2.900672791 | 9.332531238 | 13.01955042 | 13.02469079 |
| 1.141663422 | 3.530095775 | 8.71174715  | 9.977398204 | 9.980738194 |
| 2.529432941 | 0.048250761 | 10.20761893 | 12.41007409 | 12.41320577 |
| 4.166039942 | 4.186513122 | 9.41609824  | 11.23578537 | 11.2433679  |
| 2.317835634 | 2.065682293 | 9.620759544 | 10.6799319  | 10.70245057 |
| 1.354842967 | 4.087136821 | 11.67469264 | 9.12108822  | 9.127309552 |
| 1.121489724 | 0.037990753 | 7.49615394  | 10.01485253 | 10.01803762 |
| 2.722914939 | 0.201654233 | 9.576846727 | 9.974377593 | 9.976966945 |
| 4.743459361 | 2.470507216 | 8.84033589  | 13.51867555 | 13.52142762 |
| 3.72262568  | 2.564713021 | 9.319856447 | 11.41522353 | 11.41779424 |
| 3.706678972 | 4.049569305 | 10.24302343 | 11.16628183 | 11.17804418 |
| 0           | 0.982014977 | 9.524364734 | 8.400259842 | 8.400259851 |
| 3.405541651 | 5.003583807 | 9.737646938 | 12.73259003 | 12.73447491 |
| 0.020957385 | 3.808787642 | 9.269560304 | 7.454225598 | 7.45422554  |
| 5.0833699   | 0           | 7.606841348 | 13.09960877 | 13.10299259 |
| 1.340253995 | 1.344780696 | 9.611194438 | 8.129450287 | 8.12945039  |
| 4.130715415 | 3.870206647 | 10.30112377 | 11.95469791 | 11.96448357 |
| 2.893136986 | 1.158719128 | 8.035695723 | 12.3719377  | 12.41020061 |
| 0.32637092  | 4.041458064 | 9.001705722 | 9.050734771 | 9.064374864 |
| 2.001957502 | 1.586733043 | 9.514164508 | 11.29588568 | 11.29875671 |
| 2.945268877 | 0.279947106 | 10.12173197 | 11.12967406 | 11.14758537 |
| 1.604766973 | 1.591038369 | 9.515355009 | 11.13844622 | 11.18835195 |
| 0           | 0.877492772 | 10.03643922 | 7.198758169 | 7.207213575 |
| 0.014332843 | 1.643533226 | 9.352994787 | 9.234022833 | 9.239076415 |
| 1.59222438  | 5.293107339 | 9.26423698  | 8.276108588 | 8.279344597 |
| 3.656806511 | 0.588340127 | 8.215311528 | 11.64342622 | 11.64657923 |
| 5.01357222  | 1.808010727 | 9.03001612  | 13.94348362 | 13.94472009 |
| 6.043308552 | 3.212113414 | 9.051190637 | 14.39109775 | 14.39420963 |
| 1.548472189 | 6.665482005 | 9.64092246  | 10.36452446 | 10.36874897 |
| 1.07134552  | 0.022063015 | 8.872732505 | 8.323881077 | 8.323881041 |
| 2.482620639 | 0           | 8.49333105  | 9.897663607 | 9.90470669  |
| 4.619817857 | 0           | 4.615509018 | 11.01404292 | 11.02082629 |
| 3.790349137 | 6.852306828 | 9.292456699 | 10.42269848 | 10.43304036 |
| 2.762508027 | 5.762364641 | 9.64603255  | 11.94022898 | 11.94210573 |
| 1.801324152 | 0           | 8.586883236 | 9.543526329 | 9.547545866 |
| 4.98639646  | 3.658630045 | 8.535305177 | 13.64741704 | 13.65186539 |
| 2.641226142 | 2.376286447 | 8.421769487 | 10.8300374  | 10.83417484 |
| 5.524316539 | 0.535505339 | 0           | 12.64048932 | 12.64291736 |
| 4.201104774 | 1.840967838 | 9.254028195 | 12.71248345 | 12.71789402 |
| 3.631761623 | 0           | 2.642214057 | 12.14742865 | 12.15049604 |
| 4.717694751 | 2.754407534 | 8.745663993 | 13.47530494 | 13.47784342 |
| 4.662358339 | 2.065515515 | 7.650881134 | 13.4364006  | 13.45173989 |
| 4.12399892  | 1.080123531 | 8.170317084 | 10.86810557 | 10.87401331 |
| 5.30140311  | 3.474031956 | 9.532117072 | 13.1787438  | 13.18202346 |

|             |             |             |             |             |
|-------------|-------------|-------------|-------------|-------------|
| 1.827030621 | 10.1691142  | 10.03597434 | 11.21598474 | 11.24978522 |
| 6.047617404 | 0.709652728 | 5.727112999 | 13.89982424 | 13.90231698 |
| 3.39732913  | 5.886786712 | 10.22465022 | 10.57991895 | 10.58442223 |
| 5.470740143 | 0.863004588 | 7.769839966 | 13.78757487 | 13.79002118 |
| 3.464320436 | 6.895186513 | 9.607881179 | 11.61930336 | 11.62541667 |
| 1.336692482 | 3.272037833 | 10.80890863 | 10.11125878 | 10.11497815 |
| 5.851375651 | 8.501696435 | 9.353929663 | 13.61105836 | 13.61350737 |
| 0.840445405 | 0           | 10.76459841 | 9.608933942 | 9.613144017 |
| 5.353259677 | 0.006142349 | 9.463090157 | 12.80478179 | 12.81955568 |
| 1.171147082 | 3.955270781 | 1.166264224 | 10.21905876 | 10.24937543 |
| 1.227049993 | 1.221483001 | 8.396962577 | 10.11143009 | 10.14274626 |
| 1.749325954 | 2.774578534 | 10.20890899 | 10.23702073 | 10.24118078 |
| 4.753914175 | 2.989367841 | 7.604137674 | 12.15287267 | 12.16024385 |
| 2.853105369 | 4.441883399 | 10.22627036 | 11.8195644  | 11.82369469 |
| 3.306169778 | 0.028981758 | 10.55211569 | 10.91487238 | 10.91818337 |
| 1.896266247 | 0.084107912 | 10.56411317 | 11.40744953 | 11.43596589 |
| 4.128218558 | 7.857118427 | 9.265057419 | 12.5233472  | 12.5287257  |
| 2.798249521 | 10.07476485 | 8.456268934 | 9.920043459 | 9.921804166 |
| 4.413548443 | 2.422158796 | 1.501411209 | 11.85929606 | 11.86519013 |
| 2.309616239 | 2.658218618 | 9.616028277 | 10.52442602 | 10.52903134 |
| 1.2225653   | 12.29311145 | 10.49239805 | 8.03913844  | 8.046096738 |
| 4.447853531 | 0.620006335 | 5.509027984 | 12.18023865 | 12.18156817 |
| 4.289115627 | 5.066654445 | 10.54454931 | 12.44200006 | 12.44350282 |
| 0.041928777 | 1.752275231 | 10.25127472 | 9.511052842 | 9.517962399 |
| 2.974195348 | 1.49207295  | 8.480195775 | 10.44229428 | 10.4492412  |
| 5.564987013 | 2.415131023 | 8.58152386  | 13.78613233 | 13.80322538 |
| 1.513683437 | 0.943253372 | 8.1984639   | 10.12041124 | 10.12646002 |
| 3.168023828 | 0.580568651 | 6.118945911 | 11.08362079 | 11.08783014 |
| 4.093609613 | 7.115006168 | 10.21596719 | 12.86002329 | 12.86508266 |
| 0.310620558 | 1.895347497 | 9.646587787 | 10.00905366 | 10.01245578 |
| 1.633720871 | 3.652359311 | 10.59370557 | 8.599294491 | 8.599294176 |
| 2.779857914 | 1.281271156 | 8.678915793 | 11.44369226 | 11.44675829 |
| 1.055392787 | 0.017069132 | 11.32652387 | 8.86730802  | 8.870590936 |
| 1.386349191 | 0.128131818 | 9.6736047   | 9.216392912 | 9.22364723  |
| 3.629503861 | 3.625853862 | 9.663715739 | 12.20721712 | 12.21049243 |
| 2.08595495  | 1.662957017 | 9.759868808 | 8.620840848 | 8.628704121 |
| 4.201156956 | 10.09543287 | 10.41102737 | 11.89582986 | 11.89771038 |
| 2.743545719 | 1.805656249 | 10.52165436 | 8.823061612 | 8.823061715 |
| 6.104119694 | 1.793817964 | 6.007083116 | 13.20253789 | 13.20432282 |
| 4.408830733 | 3.232592551 | 8.981856164 | 13.03916558 | 13.04485375 |
| 3.648999584 | 2.349060346 | 10.57027827 | 11.50272832 | 11.50560082 |
| 2.756080449 | 0.393739464 | 10.48197763 | 10.32518352 | 10.35810671 |
| 4.300965002 | 2.441273333 | 9.899434143 | 13.24789065 | 13.24960705 |
| 1.312137199 | 1.950733242 | 9.943254961 | 11.21869875 | 11.22290912 |
| 4.098208275 | 4.248958137 | 8.14825918  | 12.64046385 | 12.6447448  |
| 4.586032208 | 1.738384087 | 0.612984252 | 13.37220876 | 13.37631239 |
| 2.685441071 | 3.982520238 | 9.181952284 | 11.73782826 | 11.74290961 |
| 1.867294837 | 1.230273674 | 8.278729488 | 9.788574373 | 9.836162899 |
| 3.431809923 | 6.181316539 | 9.197981615 | 12.75435648 | 12.7575739  |
| 4.751212243 | 0.115126541 | 9.506226326 | 12.37128728 | 12.38500766 |
| 5.248212006 | 3.698792086 | 8.772342402 | 12.32945201 | 12.34465918 |
| 4.652318331 | 0.47885989  | 9.069722309 | 12.6845647  | 12.69496051 |
| 2.475842779 | 12.14265239 | 10.66232473 | 8.578652641 | 8.589804019 |
| 2.846115076 | 3.482958288 | 9.211243005 | 10.95643642 | 10.96364902 |
| 2.011438302 | 4.525030379 | 7.683895985 | 9.755637781 | 9.775010793 |
| 4.075598093 | 1.337456956 | 9.898915227 | 12.11669176 | 12.11902996 |
| 2.981937234 | 8.663483937 | 10.34400108 | 10.93821117 | 10.94225305 |
| 1.413635712 | 0.138013509 | 9.695971365 | 8.509819329 | 8.509819125 |



| hsa-miR-512-3p | hsa-miR-216b-5p | hsa-miR-767-3p | hsa-miR-552-3p | hsa-miR-372-3p |
|----------------|-----------------|----------------|----------------|----------------|
| 0.139441357    | 4.181875743     | 0.114380645    | 3.380419342    | 0.140090514    |
| 0.007859942    | 7.107674965     | 0.006736262    | 2.033667169    | 0.007887715    |
| 0              | 4.448894909     | 0              | 1.356378119    | 0.788760916    |
| 5.439143884    | 7.752434178     | 2.963488703    | 5.193653435    | 0              |
| 0.018079254    | 8.208229864     | 0.015440723    | 3.085914177    | 1.057282532    |
| 0.038205405    | 2.981465699     | 0.032407868    | 1.119829832    | 0.038350244    |
| 0.278293039    | 1.75616342      | 0.21842939     | 4.511071957    | 1.756356275    |
| 0              | 0.576108846     | 0              | 1.91511925     | 2.120007531    |
| 0.769484052    | 9.495218603     | 0              | 2.236256401    | 0              |
| 1.936323324    | 0.738364703     | 0              | 6.103516279    | 2.186192059    |
| 0.139209319    | 1.407679129     | 0.114198928    | 0.139273149    | 0.139857119    |
| 0.117132982    | 3.497395495     | 0.096784032    | 2.00294519     | 0.117655886    |
| 0              | 0.95159678      | 0              | 0.95140955     | 1.934652983    |
| 2.657646837    | 5.288198333     | 1.87783436     | 0.080772108    | 2.929223857    |
| 0              | 0.96896118      | 0              | 0.968840077    | 3.535975349    |
| 4.889421535    | 4.00315967      | 0.077535688    | 1.281682242    | 6.13796345     |
| 6.774991942    | 0               | 5.789772139    | 7.318773659    | 2.354133676    |
| 0              | 0               | 0              | 1.331093471    | 0              |
| 0.158004324    | 1.457676429     | 0.128829839    | 0.158079273    | 1.4577827      |
| 1.54055656     | 6.612114472     | 0              | 1.951442008    | 0.964078962    |
| 0.518644462    | 0.522956091     | 0.378848166    | 4.647662155    | 0.522791524    |
| 0.13824907     | 0.138916645     | 0.113446631    | 0.138312348    | 0.138891262    |
| 0.888215386    | 0               | 0              | 3.281665307    | 0.888650321    |
| 0.244631438    | 5.49936514      | 0.194035997    | 0.244765426    | 2.379120472    |
| 0.865425389    | 1.418515455     | 0              | 1.417945372    | 2.129058369    |
| 2.076272634    | 0.887779169     | 0              | 0.459014591    | 1.710953632    |
| 1.630662191    | 3.865805633     | 0.009997896    | 3.51703341     | 1.037179829    |
| 0.225608739    | 2.326385474     | 0.180022224    | 6.972342748    | 2.794134978    |
| 0.059781694    | 2.84552762      | 0.050343567    | 2.242676228    | 1.184051653    |
| 0              | 9.029385045     | 0              | 0              | 0.79338388     |
| 0.144604688    | 8.375458084     | 2.078453626    | 1.424105524    | 0.145284292    |
| 9.508281558    | 10.35402302     | 0.031488601    | 1.116475152    | 5.139355535    |
| 13.24303336    | 5.580180974     | 0.057956438    | 1.212115245    | 7.369801569    |
| 4.984821856    | 7.021630211     | 0              | 4.084169883    | 0.682686271    |
| 0              | 4.384217904     | 0              | 1.660872937    | 0.755851909    |
| 1.639936169    | 8.673004731     | 3.392344518    | 1.640031268    | 1.641052228    |
| 0.116561428    | 0.117101751     | 0.096329821    | 5.483166363    | 1.346107403    |
| 2.406404799    | 8.725066034     | 3.895456017    | 1.060473067    | 0.019094412    |
| 0.052415537    | 1.781658771     | 0.044249494    | 0.052435755    | 1.78169557     |
| 0.028203219    | 7.668724498     | 0.024004533    | 3.132359566    | 0.028307743    |
| 0.85409976     | 0               | 1.802245593    | 0              | 2.112448003    |
| 1.615748519    | 9.710519031     | 4.944236001    | 6.308075305    | 0.007867482    |
| 7.991261754    | 10.13888967     | 5.488480804    | 0.148580089    | 2.554924036    |
| 1.605463726    | 11.41187237     | 0.171779574    | 5.196943532    | 0.21566293     |
| 8.176917719    | 4.189484549     | 3.832464285    | 2.650946546    | 7.454433471    |
| 0              | 10.83155192     | 0              | 0              | 0              |
| 0.315373406    | 0.317400098     | 0.244718329    | 9.337603858    | 1.841989779    |
| 1.37216844     | 2.477761305     | 1.374375435    | 1.372016333    | 0.125983377    |
| 9.942902048    | 10.49788127     | 1.80136988     | 8.135061285    | 8.364986798    |
| 0.246732421    | 1.681105682     | 0.195573535    | 4.11412946     | 0.24810967     |
| 1.332428482    | 0.111563634     | 1.334972641    | 3.276440446    | 1.33086998     |
| 0              | 2.770514038     | 0              | 2.605374309    | 0              |
| 0              | 5.193513998     | 0              | 3.122382756    | 0.559393811    |
| 2.210478518    | 0.185180429     | 0.14894001     | 1.52828084     | 0.18514371     |
| 1.715647971    | 1.715124692     | 1.109081616    | 3.749408252    | 1.715148619    |
| 0              | 11.52966684     | 0              | 1.317513556    | 0              |

|             |             |             |             |             |
|-------------|-------------|-------------|-------------|-------------|
| 0.122180379 | 7.158684065 | 0.100787807 | 7.708522098 | 2.017627356 |
| 0           | 3.286588432 | 0           | 3.189201568 | 0           |
| 0.007375719 | 8.827080618 | 0.00632231  | 0.007378287 | 1.023549845 |
| 2.407684341 | 10.88392848 | 5.973040719 | 2.081736139 | 1.061159824 |
| 0.541437695 | 1.625165552 | 0           | 0.541563686 | 0           |
| 12.39732468 | 1.937063967 | 3.722514943 | 0.097546741 | 7.943493299 |
| 6.546577735 | 10.07386476 | 0.006300478 | 0.007352744 | 1.023468752 |
| 0.638910558 | 4.001521458 | 1.785257081 | 0.639017222 | 1.128619484 |
| 0.754183552 | 9.300332633 | 5.993456118 | 1.659748564 | 4.781371764 |
| 0.000412487 | 4.52570744  | 1.001355052 | 0.000412628 | 2.809323765 |
| 0.180778938 | 0.181720639 | 0.146322794 | 0.180868166 | 0.181684818 |
| 0           | 4.095022199 | 0           | 2.447069171 | 0           |
| 0.237538463 | 3.182255335 | 0.188830254 | 0.237667134 | 0.238845417 |
| 0.865120825 | 8.239187107 | 0           | 3.24385837  | 0           |
| 7.482542703 | 8.444331265 | 4.071114079 | 1.504596186 | 2.229573383 |
| 0.044367225 | 3.912353276 | 0.037556555 | 2.513432704 | 1.752693242 |
| 0.048107491 | 9.798073935 | 0.040671444 | 1.149876805 | 0.048293919 |
| 1.74306464  | 0.272621079 | 0.213179748 | 3.804980872 | 0.272558945 |
| 0.822577082 | 9.378531541 | 3.42476914  | 0.822635677 | 0           |
| 0           | 8.908996063 | 2.725583966 | 3.289457416 | 2.716691179 |
| 6.634394463 | 3.882833237 | 4.258667412 | 0.03789462  | 1.729017155 |
| 2.722607326 | 11.33749285 | 0.16153246  | 0.200956807 | 4.822801999 |
| 0           | 8.69677372  | 0           | 0.671656257 | 0           |
| 0.05712373  | 6.954596339 | 0.048148081 | 0.057145989 | 0.057349481 |
| 1.5131431   | 0.179197661 | 0.144410513 | 1.512925824 | 2.190348212 |
| 0           | 0.98203737  | 0           | 0           | 1.975839222 |
| 0           | 1.666084891 | 0           | 3.678352224 | 0           |
| 0.022039575 | 9.379099448 | 0.018797746 | 3.10421923  | 7.180351798 |
| 0           | 7.811481058 | 0           | 0           | 0.49385455  |
| 0           | 2.295849671 | 0           | 0.807093202 | 2.042728931 |
| 0.128065931 | 7.88699672  | 0.105439799 | 3.107476896 | 0.128649636 |
| 0           | 4.156469533 | 0           | 0           | 1.159080202 |
| 0.356351739 | 0.35877549  | 0.273085312 | 1.93835803  | 1.933663657 |
| 0.000448857 | 7.816186986 | 0.000385663 | 1.001445846 | 0.000450415 |
| 0.278692566 | 6.376993766 | 0.21871586  | 0.278853304 | 0.280325821 |
| 4.757388657 | 8.738787016 | 2.260834211 | 0.209762526 | 0.210756781 |
| 0           | 9.087968013 | 0.8743694   | 0           | 0           |
| 8.027253838 | 9.548783907 | 5.714824581 | 1.64367705  | 2.388906685 |
| 0.710933251 | 2.538565628 | 0           | 3.892207781 | 12.7373428  |
| 0.58735384  | 1.938492447 | 0           | 0           | 1.060679833 |
| 0           | 3.676509099 | 0           | 2.375155618 | 0           |
| 8.726741351 | 10.76032152 | 3.849946146 | 3.212722373 | 4.959198201 |
| 0           | 0           | 0           | 5.73292159  | 1.549152034 |
| 1.069811387 | 2.685032085 | 2.681528494 | 0.022009167 | 0.02208162  |
| 1.180752389 | 1.182143232 | 0           | 0           | 0           |
| 0           | 6.37479501  | 0           | 0.828211963 | 3.420286113 |
| 1.985423442 | 7.66839274  | 0.988927979 | 5.567070296 | 9.205861699 |
| 3.958848432 | 10.20559025 | 2.61010752  | 5.70298993  | 1.650380127 |
| 2.007662871 | 0.962462424 | 4.55977998  | 0.513974273 | 5.392350714 |
| 0.407991484 | 5.30799782  | 0.392510233 | 3.259705321 | 0.409608622 |
| 0.012172572 | 2.051728726 | 0.010417007 | 2.051895301 | 0.012216029 |
| 0           | 1.846728854 | 0           | 0           | 1.613417069 |
| 0           | 6.067323408 | 0           | 1.439772077 | 0           |
| 0           | 0.890943445 | 2.646977848 | 0           | 0           |
| 7.929141355 | 4.390611417 | 2.063756831 | 1.813328657 | 4.635485073 |
| 0.015455302 | 3.535140087 | 0.013211508 | 0.015460786 | 0.015510909 |
| 7.767626212 | 1.682628892 | 0.021631885 | 1.080347596 | 3.290675296 |
| 0           | 5.798500969 | 0           | 1.332958332 | 0.798899164 |

|             |             |             |             |             |
|-------------|-------------|-------------|-------------|-------------|
| 0.300905701 | 0.302799721 | 0.234532442 | 8.252511354 | 0.302727592 |
| 0           | 3.417306592 | 0           | 0           | 0           |
| 0           | 10.71444645 | 3.954578282 | 4.328449689 | 0.814547523 |
| 1.870265005 | 2.043526385 | 0           | 0           | 0.863535708 |
| 1.700409416 | 4.794184598 | 0.02553834  | 5.82501727  | 2.453207771 |
| 4.398745812 | 0.110571766 | 4.62080086  | 3.471695922 | 16.40084959 |
| 3.363293019 | 10.36382565 | 3.477247525 | 7.665372288 | 0           |
| 2.180898579 | 0.436440927 | 0           | 0           | 3.508169906 |
| 0.006125783 | 6.617388036 | 1.020030276 | 0.006127909 | 0.006147338 |
| 0.053950099 | 3.417798927 | 0.045521529 | 2.220263885 | 0.05416185  |
| 0.072457824 | 0.072765323 | 0.060760637 | 1.222137737 | 0.072753638 |
| 11.67204057 | 10.77131839 | 4.584280169 | 2.176123637 | 4.853938047 |
| 0.096279159 | 5.253235847 | 0.080100845 | 2.377612508 | 4.015993603 |
| 2.629790303 | 8.359580925 | 5.689890368 | 3.748878909 | 0.009718573 |
| 0.028899314 | 9.606301873 | 0.024591199 | 0.028909893 | 1.695778195 |
| 1.255257108 | 3.368467523 | 0.070038643 | 0.08387318  | 1.254091817 |
| 1.583551595 | 4.793053428 | 3.759576406 | 6.921446647 | 3.198256598 |
| 4.320101198 | 8.892953338 | 3.380290116 | 9.590177697 | 4.037515818 |
| 0           | 1.135253998 | 0           | 1.133855616 | 1.135186236 |
| 2.657429093 | 10.18972003 | 0           | 2.657516092 | 0           |
| 0.070956618 | 0.071256803 | 0.059531557 | 10.57883582 | 1.216851409 |
| 8.798410784 | 2.538704229 | 4.306138331 | 0           | 6.424239017 |
| 0.04215965  | 3.78585377  | 0.035714408 | 4.010414139 | 0.042320897 |
| 0.04420488  | 5.679492389 | 0.037421177 | 0.044221627 | 0.044374717 |
| 0.170867744 | 5.373793912 | 0.138741535 | 0.17095065  | 0.171709366 |
| 0.0210855   | 3.911553116 | 0.017989836 | 0.021093081 | 2.088764937 |
| 0           | 0.943322611 | 0           | 1.514789034 | 0           |
| 0.579569789 | 2.85847107  | 0           | 0           | 1.05035203  |
| 7.901302903 | 11.70347587 | 4.529393022 | 6.196273854 | 3.005879083 |
| 0.338479961 | 0.340726664 | 0.260800569 | 0.338692535 | 0.340641072 |
| 0.221083158 | 11.3988467  | 4.49459004  | 3.653511867 | 0.222268017 |
| 0           | 5.189526408 | 3.077555854 | 0.757201303 | 1.281540914 |
| 2.397682056 | 0.017085786 | 0.014542903 | 0.017027952 | 3.25173123  |
| 0.127684967 | 2.485461524 | 0.105139222 | 1.378237195 | 1.376591462 |
| 2.310122691 | 11.22284076 | 3.872950304 | 3.843501245 | 0.686194765 |
| 0.020153222 | 2.901194021 | 1.065156897 | 1.064007017 | 0.020226535 |
| 1.19591586  | 2.860662026 | 0.053414898 | 10.09815564 | 0.063762375 |
| 0.653000963 | 8.342357971 | 0           | 0.653104455 | 1.513823275 |
| 0           | 0.849382772 | 0           | 1.397015187 | 0.849356285 |
| 0.663880697 | 5.392010911 | 0           | 2.274190279 | 0.665021873 |
| 1.783424462 | 9.080494118 | 1.386804903 | 1.388067664 | 0           |
| 2.756770071 | 11.80710617 | 0.296981262 | 0.391941514 | 0.394362615 |
| 9.369143548 | 9.918290788 | 4.849671885 | 0.902560051 | 0           |
| 0.101491812 | 7.406353244 | 1.308281145 | 3.438773044 | 1.950341732 |
| 0           | 4.319228621 | 0           | 4.014983395 | 1.529755581 |
| 0.610916629 | 0.612245721 | 0           | 2.182605263 | 0           |
| 1.267096719 | 5.457163412 | 0.073378721 | 0.087993387 | 2.346520341 |
| 3.138154861 | 5.946775185 | 1.233765562 | 1.23095657  | 0.075791914 |
| 4.488139899 | 7.206979107 | 4.904645762 | 5.08796829  | 0.229819649 |
| 12.3947305  | 5.378986494 | 0.094877054 | 0.114785025 | 8.06182341  |
| 0           | 6.254368364 | 0           | 0.818294489 | 0           |
| 0.911436938 | 0.913502531 | 0           | 0.911610431 | 0.479248368 |
| 0.123768336 | 2.472160203 | 0.102044703 | 11.14152303 | 0.124327895 |
| 0.24294542  | 0.244346875 | 0.192800675 | 1.675316227 | 2.844593065 |
| 0.118247253 | 3.676725844 | 0.097669048 | 2.006551475 | 3.070734595 |
| 0.113280508 | 11.04620241 | 0.093719202 | 1.338495086 | 1.337041348 |
| 0           | 0.491124086 | 0           | 8.61366697  | 0           |
| 1.405179798 | 9.885658088 | 0.112877741 | 0.137586184 | 0.138161287 |

| hsa-miR-216a-5p | hsa-miR-1270 | hsa-miR-33b-3p | hsa-miR-183-3p | hsa-miR-6502-5p |
|-----------------|--------------|----------------|----------------|-----------------|
| 4.182069241     | 0.128426774  | 0.104024946    | 0.091330507    | 0.074927517     |
| 6.984075579     | 1.616279568  | 1.61502244     | 1.0245031      | 1.0231477       |
| 4.555465615     | 1.343945916  | 0.775994285    | 1.816404243    | 2.611476494     |
| 7.769412521     | 3.778557626  | 3.258352768    | 0.864804081    | 0.871198517     |
| 7.822324907     | 0.01694686   | 2.397333645    | 0.0128079      | 1.052612968     |
| 3.348838287     | 1.122701053  | 2.150073303    | 2.733898166    | 1.108646992     |
| 1.756916842     | 2.473284357  | 1.722669226    | 1.68270371     | 0.134425452     |
| 0               | 2.59881286   | 1.039901785    | 4.68589555     | 0.58657727      |
| 9.575862032     | 1.291318538  | 1.997862161    | 0.77105249     | 0               |
| 1.636499718     | 0            | 0              | 1.656098827    | 0               |
| 1.408043339     | 1.418471996  | 0.103862859    | 1.383227371    | 2.414735778     |
| 3.828846091     | 2.007011283  | 1.981312029    | 0.077790903    | 1.305824174     |
| 1.525243466     | 0            | 2.739680619    | 0              | 1.532132904     |
| 4.902216163     | 4.270152184  | 1.243676908    | 1.234448687    | 2.2603173       |
| 0               | 0            | 3.277827325    | 2.282219379    | 0.971130035     |
| 4.120751488     | 3.573325366  | 0.070957978    | 1.26723434     | 0.052010324     |
| 2.143127444     | 3.679665642  | 0              | 0.711480382    | 1.250593695     |
| 0               | 6.031798223  | 0.793904711    | 0              | 0               |
| 0.158674401     | 0.145135272  | 2.098124527    | 0.102318742    | 0.08363165      |
| 7.01640744      | 1.951003398  | 1.541509594    | 0.964727353    | 0               |
| 0.522295563     | 3.8515063    | 2.157074531    | 0.276384196    | 2.625608667     |
| 1.405458573     | 4.671096758  | 0.103191726    | 4.64828342     | 1.353262976     |
| 0               | 3.628995012  | 2.169388897    | 0              | 0               |
| 3.928261504     | 2.384179107  | 1.650533375    | 0.150524091    | 1.565098183     |
| 2.385359697     | 5.237561621  | 0              | 2.404882356    | 0.873597364     |
| 2.07803688      | 3.933763467  | 1.726831815    | 2.138341721    | 0.917205416     |
| 1.630514603     | 3.964513711  | 0.009257436    | 1.036274799    | 1.034246909     |
| 1.630257594     | 0.205236225  | 2.272807765    | 0.140348536    | 0.113288833     |
| 3.269901226     | 0.055697727  | 2.228475352    | 2.544297998    | 0.034386606     |
| 9.229310459     | 3.904221662  | 4.206888475    | 0.794373948    | 0.803373554     |
| 8.354664849     | 3.159267395  | 0.107622898    | 2.035057432    | 0.077374618     |
| 10.26852615     | 4.177018504  | 0.029047121    | 0.025953905    | 0.021786194     |
| 4.71961274      | 3.305141864  | 0.053218229    | 1.202692202    | 0.039384425     |
| 6.968770426     | 2.092021048  | 0.675928919    | 3.225638783    | 0               |
| 4.482724892     | 1.960491269  | 1.668779901    | 3.345474558    | 0               |
| 8.337158012     | 6.108342856  | 1.954292932    | 0.741690641    | 0               |
| 0.117019266     | 0.10770895   | 1.341621525    | 0.077439078    | 1.928454946     |
| 8.181418048     | 3.260314759  | 1.06054295     | 1.05864983     | 0.011358113     |
| 3.411281505     | 1.784960289  | 2.797207046    | 0.036289754    | 1.146695821     |
| 6.912976259     | 8.993360298  | 2.112242825    | 0.01984387     | 0.016694319     |
| 1.801291626     | 2.585049412  | 4.305524834    | 1.412107125    | 0               |
| 8.561229244     | 5.209534128  | 2.35511406     | 0.005592814    | 0.004729804     |
| 10.14868974     | 3.931124509  | 2.071810997    | 1.405492065    | 0.079212448     |
| 11.20030559     | 3.383382159  | 0.154741828    | 0.134317325    | 2.149343767     |
| 3.890297055     | 5.246620961  | 0.130357214    | 0.113768309    | 0.092635624     |
| 11.1651049      | 1.480101914  | 1.483606589    | 0              | 0               |
| 0.317090189     | 1.858848981  | 1.798424369    | 0.186530674    | 1.685556829     |
| 3.328766568     | 0.115741779  | 2.005744091    | 0.082860802    | 0.068175409     |
| 9.359348129     | 4.403363395  | 0.851816747    | 1.411340086    | 0               |
| 1.681770111     | 2.389852793  | 1.655134572    | 0.151634575    | 0.121956275     |
| 1.981927601     | 1.339772228  | 2.732072708    | 1.313555648    | 1.291786121     |
| 2.91781801      | 1.267319924  | 3.425165495    | 0              | 2.483270557     |
| 5.594105565     | 3.1274126    | 0              | 1.029485279    | 1.970062996     |
| 0.185032989     | 1.539001403  | 0.134674938    | 2.134812541    | 0.095495615     |
| 1.715218229     | 0.031903829  | 1.711410552    | 1.10360663     | 1.09746776      |
| 12.09547825     | 3.733599811  | 0.782999808    | 0              | 1.342427362     |

|             |             |             |             |             |
|-------------|-------------|-------------|-------------|-------------|
| 7.625613395 | 3.508681565 | 2.433734674 | 0.080887043 | 1.317348506 |
| 2.975373621 | 3.767173538 | 0.634356976 | 1.141409348 | 1.162717883 |
| 8.204048782 | 1.024213654 | 3.202707223 | 0.005263428 | 0.004451786 |
| 10.66503963 | 3.41434702  | 0.015254541 | 3.078886346 | 0.01153085  |
| 1.858664873 | 4.883791216 | 1.349114203 | 3.269603263 | 2.50658857  |
| 0.097874449 | 3.884373825 | 1.290230185 | 0.065563864 | 1.879323473 |
| 8.969773538 | 4.68084181  | 0.005837648 | 0.005245298 | 1.610120291 |
| 4.05693851  | 3.085517203 | 0           | 2.0648341   | 1.159813878 |
| 9.750890913 | 3.978977307 | 0           | 2.650984296 | 0           |
| 4.646008151 | 2.001796356 | 0.000328727 | 0.000295767 | 0.000250619 |
| 0.181576804 | 0.165512865 | 3.959485762 | 0.115469286 | 1.443018678 |
| 3.935344286 | 1.872016446 | 0.905727537 | 0.908166317 | 0           |
| 1.659473759 | 1.6742505   | 3.086459044 | 0.146755573 | 0.118216592 |
| 7.972219426 | 4.533896834 | 1.419906123 | 1.829130146 | 0.873306201 |
| 7.844056377 | 3.483021812 | 1.506124129 | 0.936136727 | 1.513872151 |
| 3.669074563 | 5.256789621 | 2.172899135 | 0.030881552 | 0.025876458 |
| 9.136231711 | 1.153446283 | 3.005581788 | 0.033402028 | 1.740153006 |
| 2.450656985 | 0.244929886 | 0.190743458 | 0.164268316 | 0.131589119 |
| 9.211991854 | 3.710274963 | 0.820338739 | 0.824471179 | 0           |
| 8.036076127 | 1.354667812 | 0           | 0           | 0.828323721 |
| 2.156768965 | 4.08702146  | 1.724751252 | 0.026480566 | 0.022224047 |
| 10.0310292  | 3.064260844 | 1.551473939 | 0.126770984 | 0.102781737 |
| 8.441772755 | 1.162409298 | 0           | 0.67166034  | 0.684036827 |
| 7.050424705 | 1.801972904 | 4.145280126 | 1.781759634 | 0.032935829 |
| 1.510953065 | 0.163277234 | 0.130677592 | 0.114039704 | 2.073131823 |
| 1.562854935 | 2.558687001 | 0           | 1.977806316 | 1.565505113 |
| 1.665889998 | 1.660987555 | 1.672965173 | 1.99424104  | 0.769469883 |
| 9.32162995  | 3.274211188 | 2.088433639 | 0.015571698 | 1.063844815 |
| 7.554152206 | 3.244217373 | 0.925783128 | 2.365004143 | 1.613835522 |
| 2.29570114  | 0           | 1.742117989 | 0           | 1.768085857 |
| 8.130226454 | 2.488615702 | 0.096038316 | 1.356069793 | 1.330638095 |
| 4.484322016 | 1.519743346 | 0.656015117 | 1.548694822 | 1.189664573 |
| 0.358404732 | 0.318211758 | 0.242017359 | 0.206165482 | 1.749367362 |
| 8.002406046 | 3.461649514 | 4.461490641 | 0.000321838 | 0.000272708 |
| 6.300162927 | 2.93921788  | 0.195521994 | 1.683472264 | 0.134579763 |
| 8.297783818 | 5.14616068  | 0.151552578 | 1.543369685 | 0.106561377 |
| 9.640524227 | 4.606597965 | 1.434899885 | 1.844831297 | 0           |
| 10.06069269 | 3.658189777 | 1.048096    | 1.04661333  | 1.04398343  |
| 1.598338974 | 2.537546704 | 1.222454611 | 2.394778494 | 1.250920082 |
| 2.753738269 | 4.77832562  | 1.712857315 | 2.823570041 | 0.599398482 |
| 3.472145336 | 1.805541255 | 1.412246482 | 0           | 0.867448373 |
| 10.02652007 | 4.667995853 | 0.071880441 | 0.063578832 | 2.892288213 |
| 0           | 0.970089592 | 0           | 0           | 0.972954378 |
| 3.103865314 | 0.020611379 | 1.667683331 | 0.015545016 | 0.013098302 |
| 1.181900287 | 0.672450419 | 3.813145377 | 1.574351145 | 0           |
| 7.177151779 | 4.416130772 | 0           | 2.0941051   | 0.837803063 |
| 7.709814756 | 3.683595739 | 0           | 0           | 1.987657515 |
| 10.15574269 | 3.169476077 | 2.622022302 | 1.978288342 | 0           |
| 0           | 5.70620993  | 1.305405896 | 1.323279349 | 1.356083359 |
| 5.658177526 | 2.259101352 | 0.80588889  | 2.19512238  | 1.466870085 |
| 1.038753282 | 2.86443695  | 3.639212929 | 0.008658126 | 1.626325528 |
| 2.223327537 | 3.079194466 | 1.338083202 | 0           | 1.930736544 |
| 6.175432301 | 2.819992908 | 2.161838001 | 0           | 2.441224956 |
| 1.851574387 | 4.82136077  | 0           | 3.549534854 | 0           |
| 4.434316367 | 2.755163955 | 3.264904055 | 1.543165056 | 2.534350693 |
| 3.073560903 | 2.65585091  | 1.049337862 | 1.64112925  | 1.637224152 |
| 3.290713508 | 4.029728119 | 1.080348895 | 1.077779807 | 0.015069059 |
| 5.896400264 | 0.793340746 | 0           | 1.343149308 | 0.808753387 |

|             |             |             |             |             |
|-------------|-------------|-------------|-------------|-------------|
| 1.809502593 | 1.825590845 | 1.769309262 | 0.17939143  | 1.66203962  |
| 4.157745566 | 3.011712911 | 1.257087789 | 1.503969142 | 2.366371826 |
| 10.40134093 | 2.05034121  | 1.751604399 | 0.815718254 | 0           |
| 3.522984638 | 1.441564682 | 0.85354676  | 2.408510075 | 2.157485907 |
| 5.796462939 | 3.601780526 | 1.094622975 | 0.021099013 | 1.086179484 |
| 1.328342471 | 1.336965997 | 0.083230715 | 2.704362636 | 1.289491582 |
| 9.608055478 | 5.022973927 | 2.880167397 | 3.144876936 | 0.647003954 |
| 0.85432879  | 1.163847617 | 1.449981466 | 0           | 0.443578629 |
| 6.690645694 | 2.349607367 | 0.004868138 | 0.004375196 | 0.003701739 |
| 2.551899892 | 4.645629125 | 1.780417068 | 0.03731444  | 0.031194586 |
| 1.2213592   | 5.378455216 | 0.055766239 | 1.829943875 | 0.041212691 |
| 10.28176437 | 2.177155902 | 2.166585498 | 1.128456132 | 1.723618129 |
| 4.437687246 | 3.215333768 | 0.073273406 | 2.662554337 | 0.053640801 |
| 7.933840467 | 3.74806902  | 0.007682547 | 1.030134683 | 0.005832383 |
| 8.869912506 | 1.697730407 | 1.692734631 | 2.109331199 | 0.017095363 |
| 2.94144617  | 1.261062849 | 1.252380217 | 0.056869379 | 1.226709086 |
| 4.382187983 | 1.20210444  | 0.696378985 | 0.702155725 | 1.239172899 |
| 8.572673422 | 4.75202778  | 0.037530719 | 1.144388093 | 0.028016112 |
| 1.134988044 | 2.028985258 | 0           | 3.45805294  | 0           |
| 10.58016522 | 1.55554645  | 3.894340931 | 2.355539395 | 1.219989022 |
| 0.071210993 | 1.222845743 | 1.215913142 | 0.048533868 | 0.040412196 |
| 2.933873678 | 4.027437755 | 1.469031733 | 1.485039851 | 1.816355718 |
| 3.785923963 | 2.175199017 | 1.131475627 | 1.732958587 | 1.119357173 |
| 4.918005759 | 4.015266035 | 3.508290707 | 1.132928039 | 1.728347809 |
| 4.023910608 | 4.392358602 | 0.125666292 | 0.109790214 | 0.089514732 |
| 3.099655171 | 2.415475876 | 0.01663415  | 0.014907228 | 1.061148369 |
| 0.943281294 | 0           | 3.503278014 | 1.929299871 | 1.522974223 |
| 2.465666187 | 2.463863616 | 0           | 2.177974943 | 2.0053374   |
| 10.78950399 | 5.215647738 | 1.003922721 | 0.000869485 | 2.004422643 |
| 2.623801273 | 1.911036946 | 3.314129791 | 0.197706453 | 0.156743809 |
| 10.43917868 | 1.633330884 | 0.159013702 | 0.137895111 | 0.111396745 |
| 5.893700748 | 3.596069034 | 2.233493052 | 2.973378555 | 0           |
| 1.65100373  | 1.65216406  | 2.068761687 | 2.389391318 | 2.060454171 |
| 0.128197207 | 2.041002162 | 2.01237187  | 0.084241635 | 0.069278804 |
| 11.30847793 | 2.656381432 | 1.869365174 | 0           | 0.69754309  |
| 2.411070293 | 4.622915534 | 3.257701475 | 0.014257111 | 2.394853596 |
| 3.458649301 | 2.258043869 | 3.582216233 | 1.18744944  | 2.209936272 |
| 9.016691006 | 1.505889345 | 1.520073914 | 1.535217792 | 0           |
| 1.7939008   | 5.477067558 | 0.847042349 | 1.405615654 | 0           |
| 5.121794373 | 4.115514117 | 0           | 1.551113362 | 1.191776337 |
| 8.977900145 | 3.551691165 | 3.670782124 | 2.37154427  | 0           |
| 11.29699751 | 2.748517088 | 0.26220945  | 0.222431728 | 1.801324239 |
| 9.603387158 | 3.019224992 | 2.669808494 | 0.904175784 | 1.477712739 |
| 7.594716322 | 0.09398829  | 4.568161319 | 0.068071637 | 0.056293547 |
| 3.252070707 | 0.953948362 | 3.842230852 | 2.264419779 | 0           |
| 3.482997968 | 4.351248471 | 0           | 2.730997234 | 2.270605861 |
| 5.736195044 | 0.081613738 | 0.067201436 | 0.059505217 | 1.853807366 |
| 5.489206034 | 3.797103889 | 0.058010463 | 1.220271002 | 1.81951235  |
| 7.297898412 | 2.340315297 | 1.614927959 | 1.583302325 | 0.11452413  |
| 5.103538788 | 3.054596986 | 2.410744387 | 0.076312992 | 1.300306731 |
| 5.875177861 | 0.813891236 | 0           | 2.080254097 | 2.356709895 |
| 2.409156237 | 2.864310772 | 0.905208635 | 1.548927054 | 0.487668677 |
| 0.124261206 | 1.375642011 | 0.092999322 | 0.081857115 | 0.067372749 |
| 0.244132707 | 1.687543929 | 3.796196558 | 0.149631037 | 1.562049563 |
| 2.795050736 | 2.455289128 | 1.34609271  | 1.331690475 | 0.064664939 |
| 10.33589026 | 1.34609331  | 3.430562131 | 0.075414633 | 1.296947702 |
| 1.537412767 | 3.313629903 | 1.266430846 | 2.977525014 | 0.960066792 |
| 9.989471392 | 2.520180219 | 0.102684101 | 2.01634175  | 2.410601079 |

| hsa-miR-301b-3p | hsa-miR-10a-3p | hsa-miR-196a-5p | hsa-miR-520a-3p | hsa-miR-519a-5p |
|-----------------|----------------|-----------------|-----------------|-----------------|
| 1.41656383      | 4.017760816    | 2.5278179       | 0.13982657      | 0.139679158     |
| 3.622659629     | 2.033469079    | 0.007837713     | 0.00787643      | 0.007870123     |
| 2.675046566     | 2.86096164     | 1.929871408     | 0.388207849     | 0               |
| 4.030407599     | 3.3719483      | 1.414363053     | 4.897699382     | 4.164476549     |
| 1.058867903     | 2.076031807    | 10.69222754     | 0.01811811      | 0.018103246     |
| 1.122536715     | 2.156890481    | 2.982123709     | 0.038291385     | 0.038258494     |
| 1.762598799     | 1.759922983    | 0.276994303     | 4.367471894     | 3.30265676      |
| 2.121006414     | 3.65116815     | 0.573797035     | 0               | 3.156163304     |
| 1.985823385     | 1.680286829    | 0               | 1.296877296     | 0.769766982     |
| 5.689985612     | 1.63368772     | 6.682680029     | 1.636151105     | 0               |
| 1.415934803     | 3.352918647    | 1.410975901     | 0.139593727     | 0.139446623     |
| 2.001554536     | 3.277804318    | 3.829837998     | 0.117443302     | 0.117324558     |
| 1.934476307     | 1.524544877    | 0               | 0               | 0.951458029     |
| 2.317353959     | 3.145771409    | 7.086624652     | 3.685324713     | 3.158968122     |
| 3.123373943     | 2.278374002    | 2.7607481       | 1.546677744     | 0               |
| 1.287035802     | 1.922411072    | 3.406457719     | 7.590271482     | 6.368834864     |
| 2.543095663     | 3.431692089    | 1.596124104     | 6.457992073     | 5.653343019     |
| 3.992429015     | 0.791359895    | 1.719631059     | 0               | 0               |
| 1.466283664     | 0.134342877    | 0.157396895     | 0.158455738     | 0.158282981     |
| 2.271328058     | 2.754748539    | 0.963838509     | 0.964014736     | 0.963982095     |
| 2.251518012     | 2.960442033    | 0.515354654     | 0.521101567     | 0.520159987     |
| 2.067544647     | 2.848214463    | 7.413973715     | 0.138630152     | 0.138484321     |
| 0.885346766     | 0.885398453    | 0               | 0               | 0.888361687     |
| 0.206240016     | 1.681668911    | 2.384364951     | 0.24543877      | 0.24512971      |
| 1.816024945     | 2.606519761    | 0.865087404     | 0.865715331     | 0.865599488     |
| 2.83600018      | 3.02397431     | 8.187840534     | 1.216040449     | 1.709498343     |
| 4.304393477     | 2.373420993    | 11.06633311     | 1.630567553     | 3.22652914      |
| 0.191072689     | 0.188474964    | 0.224637381     | 2.327972161     | 0.226054678     |
| 2.839672039     | 0.05217677     | 0.059591676     | 0.059922732     | 1.184599656     |
| 4.416409037     | 2.680612149    | 1.713863226     | 0               | 0               |
| 4.038811201     | 3.567959784    | 1.425563999     | 2.089227615     | 0.144853635     |
| 2.153065173     | 1.118982517    | 0.036995671     | 9.219529617     | 10.41038621     |
| 2.274782114     | 1.841042012    | 0.0688112       | 14.84722258     | 14.29577512     |
| 1.176105354     | 3.378970957    | 10.4005939      | 4.140111467     | 4.522078751     |
| 1.658681993     | 3.41163037     | 0.754387195     | 0.755464669     | 0               |
| 2.907413727     | 0              | 1.258393148     | 2.40290006      | 0.740761032     |
| 1.999734954     | 1.352946993    | 0.116146129     | 0.116869896     | 1.347202276     |
| 3.258354997     | 2.079919531    | 2.406546862     | 0.019066364     | 2.671974416     |
| 0.046320201     | 3.034963593    | 3.832151805     | 2.213989994     | 0.052490687     |
| 1.694236872     | 5.454977524    | 10.11205247     | 1.088891041     | 0.028241533     |
| 1.401298284     | 0              | 0               | 0               | 0               |
| 2.356780355     | 3.359019401    | 1.02519523      | 1.025069237     | 1.025092633     |
| 2.545287124     | 0.126586896    | 2.103723386     | 8.538300357     | 9.212459703     |
| 0.182171415     | 2.284813248    | 0.213618018     | 0.215200224     | 0.214941918     |
| 4.006894874     | 1.516735227    | 3.279765311     | 7.381928521     | 7.410802728     |
| 3.45650171      | 2.204057875    | 0               | 0.916684057     | 0               |
| 3.351028026     | 1.842749535    | 4.748617652     | 0.316529459     | 0.316086791     |
| 1.378195785     | 1.3774498      | 2.48042308      | 1.371187556     | 0.125622977     |
| 2.587307638     | 2.112457761    | 1.799478208     | 10.56356243     | 10.55406094     |
| 1.688842774     | 4.470099341    | 0.245634427     | 0.247549352     | 0.247236615     |
| 4.048835907     | 3.453050614    | 0.110662752     | 1.982425613     | 1.331911101     |
| 1.653062416     | 4.589407342    | 2.419321289     | 0               | 0               |
| 1.00905806      | 2.94165945     | 8.128006586     | 0               | 0               |
| 0.157583705     | 3.693749021    | 3.535294756     | 0.18476607      | 0.184555214     |
| 1.716342894     | 2.140764194    | 2.142424552     | 1.715372809     | 3.48412911      |
| 0               | 1.704078204    | 1.316849311     | 0               | 0               |

|             |             |             |             |             |
|-------------|-------------|-------------|-------------|-------------|
| 0.10611518  | 2.016091259 | 0.121740404 | 0.122507199 | 0.12238214  |
| 0.631520315 | 3.911892534 | 7.469563733 | 0           | 1.130597591 |
| 3.034570118 | 1.614114062 | 0.007354884 | 0.007391174 | 1.023615219 |
| 2.406553712 | 1.660350947 | 1.660174557 | 2.897520867 | 3.262637855 |
| 2.5433786   | 2.545497081 | 8.085349572 | 0           | 0           |
| 3.579058582 | 0.084243589 | 2.995342779 | 13.29467951 | 12.47234328 |
| 3.620241858 | 1.024110051 | 2.031571932 | 6.038684059 | 6.167997198 |
| 2.23490126  | 0.629171191 | 1.126194886 | 0           | 1.782654047 |
| 1.962369031 | 2.215371422 | 3.971921844 | 1.2773179   | 1.277083654 |
| 2.001777576 | 3.323901569 | 1.586597852 | 0.000413336 | 0.000413011 |
| 2.644151532 | 2.641016667 | 1.521234331 | 0.181316408 | 0.181110701 |
| 3.55577971  | 2.189759918 | 0           | 1.873474124 | 0           |
| 0.200600789 | 3.144163035 | 3.186124256 | 0.238313726 | 0.23801695  |
| 4.642522324 | 2.964071495 | 1.417137771 | 0           | 1.417708888 |
| 1.911958061 | 3.223595414 | 1.504388597 | 8.18447644  | 8.377719324 |
| 3.660611884 | 1.141487234 | 11.71966856 | 0.044468449 | 1.13842415  |
| 1.767624298 | 3.675292457 | 3.686178748 | 1.14956722  | 1.149714342 |
| 1.745761335 | 0.22376373  | 0.269738009 | 0.271920165 | 0.271563688 |
| 4.237439855 | 1.361105049 | 2.534737081 | 1.757093774 | 0.82280146  |
| 2.721114596 | 2.722088285 | 0           | 1.751151355 | 1.358769003 |
| 2.484046487 | 2.155614826 | 4.272708724 | 5.399024954 | 5.834343078 |
| 2.25029804  | 0.168874303 | 0.200023457 | 0.20147202  | 3.071939724 |
| 2.291186892 | 2.477220123 | 9.938892734 | 0           | 0           |
| 1.799926559 | 3.712635015 | 1.177466691 | 1.176528007 | 0.057206467 |
| 2.6366716   | 2.184062095 | 1.51472248  | 0.178800758 | 1.512304483 |
| 0.981518151 | 0           | 0           | 0           | 0           |
| 2.622490939 | 1.27717171  | 9.912958882 | 0           | 0           |
| 3.562552009 | 1.071479691 | 6.637300356 | 1.670164815 | 2.092897552 |
| 2.907751406 | 4.465469472 | 4.755923403 | 0.493198701 | 0           |
| 0           | 0.801993311 | 0.806559196 | 0           | 0.807271968 |
| 2.817043451 | 2.03447103  | 4.468449859 | 0.12841232  | 0.12827977  |
| 2.459395794 | 3.24551105  | 7.801014886 | 1.158464486 | 1.158152921 |
| 0.292595051 | 0.287972146 | 0.354496663 | 1.93598394  | 0.357204652 |
| 2.587028331 | 3.702612991 | 2.587067064 | 0.000449782 | 0.000449428 |
| 1.763515873 | 3.252845082 | 1.76373461  | 1.759098754 | 1.75999248  |
| 1.598709172 | 1.597020009 | 3.382776562 | 4.426519365 | 3.996850336 |
| 0.873973253 | 0.874026531 | 1.432250002 | 0           | 0           |
| 3.392770163 | 1.643999008 | 0.01501769  | 9.889641852 | 9.627846255 |
| 3.608469877 | 0.703195024 | 2.141878528 | 0           | 0.71127566  |
| 2.325134808 | 1.696878116 | 1.057964514 | 0           | 0           |
| 0.855339938 | 3.365621045 | 2.374792605 | 0           | 1.807759618 |
| 3.19849988  | 4.101196873 | 2.983373223 | 9.042907474 | 9.027661919 |
| 1.548671204 | 2.76481694  | 0           | 1.549092988 | 0.970830552 |
| 1.071425869 | 3.561856457 | 1.070002234 | 1.670019692 | 2.092739739 |
| 1.846230562 | 1.174192746 | 6.895491182 | 0           | 0.680273772 |
| 2.547730684 | 4.309501471 | 5.893514267 | 0           | 0           |
| 4.56826569  | 1.57152572  | 3.305133942 | 0.989167636 | 0.989157692 |
| 0.740201    | 2.418494282 | 0           | 6.409063181 | 3.889559124 |
| 2.619303113 | 2.010426477 | 0.959280685 | 3.032334498 | 2.183444015 |
| 2.989946735 | 2.993164996 | 1.612337621 | 2.126412639 | 0.816153538 |
| 2.640093763 | 1.039779358 | 0.012137793 | 1.038803033 | 1.038839471 |
| 0.976629316 | 4.591146926 | 0.987101145 | 0           | 0           |
| 2.413379503 | 2.991923917 | 3.396975603 | 0           | 0           |
| 3.290564596 | 3.003888102 | 0           | 0           | 0           |
| 0.649248694 | 3.944896347 | 3.221273528 | 7.650377247 | 8.191018206 |
| 2.065393678 | 2.065203488 | 7.146741292 | 0.015488314 | 0.015475686 |
| 0.022591846 | 1.683408799 | 3.93235482  | 5.128814309 | 6.638433761 |
| 4.991735674 | 3.845385604 | 1.721709767 | 0           | 0           |



|             |             |             |             |             |
|-------------|-------------|-------------|-------------|-------------|
| 2.509087494 | 0.246583373 | 0.299454599 | 0.301986145 | 0.301572451 |
| 1.810093342 | 3.855332876 | 3.465156848 | 0           | 0           |
| 1.74330932  | 1.74381751  | 1.352306372 | 2.521602936 | 0.814086678 |
| 3.221154303 | 4.478837274 | 1.674871659 | 0.442160562 | 2.782696054 |
| 1.096884515 | 2.451202662 | 1.094997303 | 3.140453923 | 1.094600137 |
| 4.463571388 | 1.334787792 | 7.108440575 | 1.979205466 | 3.041548099 |
| 4.689264002 | 3.38276943  | 2.015915778 | 2.962676106 | 4.251035556 |
| 2.454218399 | 1.857840266 | 0.851158526 | 0.853694689 | 1.177067588 |
| 2.835789347 | 2.612831246 | 0.00610853  | 0.00613858  | 0.006133685 |
| 3.943419787 | 0.047161303 | 0.053780743 | 0.054075792 | 0.054027706 |
| 3.311331792 | 1.226348829 | 8.145219857 | 0.072633405 | 0.072566229 |
| 3.361807467 | 2.174257069 | 2.506725707 | 11.70586885 | 11.20336742 |
| 1.933968489 | 2.370864023 | 0.095949359 | 0.09652406  | 1.290396663 |
| 1.031735286 | 3.367620147 | 1.623011338 | 3.216953863 | 3.748863886 |
| 3.455201244 | 2.936797551 | 1.696461201 | 1.091040784 | 0.028938635 |
| 2.66190752  | 1.891533364 | 1.255997257 | 0.084046617 | 0.083967042 |
| 2.839813261 | 4.307382764 | 7.724008664 | 0.702082555 | 0.701849524 |
| 2.525655317 | 0.042202941 | 2.529529694 | 4.40303884  | 2.528990355 |
| 1.494119822 | 2.034907044 | 2.858313486 | 0.644596441 | 0           |
| 2.946737511 | 2.666851871 | 0.685470883 | 3.461606881 | 1.857349576 |
| 2.281843685 | 2.28082945  | 0.07072572  | 0.071128023 | 0.071062445 |
| 1.991513215 | 2.546889216 | 3.146373091 | 6.464897093 | 6.190813052 |
| 1.745999905 | 0.036972445 | 2.174563701 | 2.998851176 | 0.042218751 |
| 3.902210897 | 1.75305052  | 1.138520878 | 1.13779792  | 1.137932832 |
| 1.500057686 | 2.162766366 | 0.170195905 | 0.171367108 | 0.171175992 |
| 2.679329937 | 3.799383415 | 3.56222626  | 0.021131135 | 0.021113678 |
| 1.514028445 | 1.923364894 | 5.190962709 | 1.514908805 | 0           |
| 4.015962428 | 2.751113739 | 1.401202566 | 0           | 0           |
| 2.813026086 | 2.327351235 | 1.003917842 | 9.916394006 | 8.215945557 |
| 3.059993322 | 0.274757599 | 0.336759828 | 0.33976138  | 0.339270667 |
| 2.76024088  | 1.625069916 | 0.220138127 | 3.652719874 | 2.782657953 |
| 4.642374483 | 4.125652601 | 3.907795911 | 0           | 0           |
| 2.07188708  | 0.015030155 | 2.072352795 | 0.017058382 | 0.017044423 |
| 2.034827342 | 0.109436004 | 2.038094011 | 1.37739298  | 0.127898017 |
| 1.180788859 | 1.556606579 | 1.558784325 | 2.934600644 | 1.560061499 |
| 2.899097584 | 0.017779865 | 2.085376519 | 1.063879277 | 0.020180097 |
| 1.199957017 | 2.253418807 | 1.822498955 | 1.195428452 | 0.063601187 |
| 3.12162842  | 1.804166182 | 0           | 0.653658703 | 0           |
| 1.394487198 | 3.088443325 | 2.103618786 | 0           | 0           |
| 2.625884244 | 2.27941931  | 3.127801937 | 0.664522599 | 0.664266805 |
| 2.350999796 | 2.351705214 | 0           | 0           | 1.388237975 |
| 0.318967103 | 2.003129777 | 2.019337589 | 0.393269287 | 0.392659611 |
| 2.183556409 | 3.173551918 | 6.464194595 | 9.437281432 | 9.091139969 |
| 2.390371456 | 2.994709645 | 0.101140573 | 1.304808351 | 0.101652846 |
| 3.254083743 | 3.391539777 | 10.92944882 | 0.955129927 | 0           |
| 0           | 3.24618437  | 3.316859587 | 0           | 0           |
| 1.906285904 | 2.341793169 | 3.386106878 | 1.905731649 | 0.088092687 |
| 3.127353813 | 0.065601521 | 2.302487684 | 0.07566587  | 2.637144297 |
| 2.781005167 | 3.625537732 | 1.642400833 | 2.804176263 | 4.819008902 |
| 2.435415389 | 2.433621815 | 0.11432741  | 10.85832576 | 11.9413671  |
| 3.955659244 | 2.532977088 | 2.881613241 | 1.358810741 | 1.358634092 |
| 4.678453837 | 2.666733963 | 1.243344187 | 1.51652724  | 1.245393043 |
| 2.465486641 | 1.372915469 | 1.368742871 | 2.023511656 | 1.367067459 |
| 0.204901296 | 0.202053621 | 9.927758105 | 0.243745082 | 1.674467642 |
| 2.783809844 | 2.00370319  | 2.455791968 | 1.35149219  | 0.118441064 |
| 1.989254873 | 1.343791875 | 1.991535356 | 0.113578409 | 0.113464419 |
| 3.534843524 | 1.253955861 | 7.424629131 | 0           | 0           |
| 4.014848806 | 1.410497132 | 3.1419695   | 1.404101567 | 2.067548539 |

| hsa-miR-502-5p | hsa-miR-520c-3p | hsa-miR-520b-3p | hsa-miR-34a-3p | hsa-miR-2114-5p |
|----------------|-----------------|-----------------|----------------|-----------------|
| 2.07537615     | 0.134499637     | 0.134495829     | 3.123727717    | 1.419015367     |
| 2.033787511    | 0.007646377     | 0.007646211     | 3.206813838    | 0.007461437     |
| 1.757057841    | 0               | 0               | 0.769894105    | 2.075290059     |
| 2.600195059    | 1.811141895     | 1.811141322     | 2.960912243    | 0               |
| 1.656089787    | 1.05847964      | 1.058480082     | 1.05878929     | 1.058820025     |
| 2.158609695    | 0.037094168     | 0.037093306     | 2.156688064    | 0.036135458     |
| 2.926787017    | 0.266023611     | 0.266014251     | 4.129120604    | 6.770251195     |
| 2.854735018    | 0               | 0               | 1.388938429    | 0.565989958     |
| 3.621520312    | 0               | 0               | 2.809511909    | 1.982500508     |
| 2.750129256    | 0.733400777     | 0.733398742     | 1.633944763    | 0.731680952     |
| 3.890529197    | 0.134277842     | 0.134274043     | 2.068069822    | 2.868374968     |
| 4.078906011    | 0.11314538      | 0.113142303     | 1.354255161    | 0.109739105     |
| 2.735301641    | 0               | 0               | 3.511347234    | 2.926183735     |
| 1.883936095    | 0.078174685     | 0.078172702     | 2.918252891    | 0.075974027     |
| 3.75912594     | 0               | 0               | 4.652565999    | 2.277585445     |
| 2.699788958    | 4.118646176     | 4.226892459     | 1.286360955    | 3.869634934     |
| 3.761221946    | 4.950984054     | 4.950988502     | 2.99256405     | 3.963574224     |
| 3.668817803    | 0               | 0               | 3.761553013    | 3.572127122     |
| 3.197126849    | 0.152221441     | 0.152216992     | 2.571254985    | 0.14730746      |
| 1.951187503    | 0               | 0               | 1.951654206    | 2.945369836     |
| 2.269936781    | 0.488065124     | 0.488042213     | 3.76931359     | 2.289062569     |
| 2.071670655    | 0.133359912     | 0.133356145     | 2.509487296    | 0.129194787     |
| 3.909601441    | 0.886429062     | 0.886428186     | 2.42218205     | 0               |
| 1.688809603    | 0.234357651     | 0.234349794     | 1.680784057    | 2.849858133     |
| 3.954070991    | 0               | 0               | 2.387993081    | 2.127130967     |
| 2.617905048    | 0               | 0               | 2.627818213    | 1.472975455     |
| 4.37931078     | 0.011360667     | 0.011360418     | 3.054078462    | 0.011083511     |
| 3.405257483    | 0.216400778     | 0.216393727     | 1.635292111    | 4.573557344     |
| 3.264408335    | 0.057961692     | 0.057960282     | 3.064037752    | 2.57630091      |
| 3.830290167    | 0               | 0               | 2.681044353    | 0               |
| 1.432466127    | 0.139433301     | 0.139429318     | 1.429191312    | 7.094051486     |
| 3.757962473    | 4.429060869     | 4.35074142      | 2.152382128    | 1.728698818     |
| 3.30187566     | 9.954980605     | 9.971315479     | 1.216060229    | 2.882978251     |
| 3.463002897    | 2.793751693     | 2.793752561     | 2.807028244    | 5.167996093     |
| 3.405716288    | 0               | 0               | 2.217016235    | 1.960159912     |
| 3.03821649     | 0               | 0               | 1.638412727    | 0               |
| 3.482290692    | 0.112597456     | 0.112594397     | 3.937581312    | 2.789561118     |
| 3.99864339     | 1.061499406     | 1.061499871     | 3.896931534    | 0.018036381     |
| 2.544519457    | 0.050844084     | 0.050842866     | 1.166066626    | 3.828617746     |
| 1.091273052    | 0.027400686     | 0.027400063     | 1.090999943    | 4.661875296     |
| 2.368327617    | 0               | 0               | 3.358080645    | 0.850852978     |
| 2.033701653    | 0.007626774     | 0.007626609     | 2.033345989    | 0.007442317     |
| 3.395726912    | 6.316699013     | 6.316688292     | 2.09614123     | 0.138614047     |
| 5.826230789    | 0.205917785     | 0.205911189     | 3.078388726    | 1.617159067     |
| 2.190959593    | 6.503258256     | 6.503245062     | 2.181746722    | 2.995661167     |
| 0.914358182    | 0               | 0               | 0.914449224    | 1.480120564     |
| 1.853827412    | 0.300743726     | 0.300732596     | 3.618027878    | 5.599377296     |
| 1.379717654    | 0.121080042     | 0.121076699     | 1.37713669     | 1.380109224     |
| 4.0854069      | 8.391533485     | 8.384286751     | 3.23255625     | 4.512713673     |
| 3.188013793    | 0.236338173     | 0.236330225     | 1.685745805    | 3.204270828     |
| 2.764222894    | 1.338065084     | 1.3380674       | 3.255538389    | 1.339603744     |
| 0.744636389    | 0               | 0               | 0.744519822    | 2.204884026     |
| 3.036298076    | 0               | 0               | 1.887236341    | 1.643432386     |
| 4.532583234    | 0.177171623     | 0.177166213     | 2.199965978    | 0.171206702     |
| 2.469963502    | 1.109136663     | 1.109137479     | 1.715909899    | 5.811244871     |
| 5.315357515    | 0               | 0               | 2.98629672     | 2.663048082     |

|             |             |             |             |             |
|-------------|-------------|-------------|-------------|-------------|
| 2.465086948 | 0.117982332 | 0.117979094 | 3.66386413  | 3.511427123 |
| 1.488550975 | 1.124364344 | 1.124361684 | 1.122478139 | 1.122314301 |
| 3.034956019 | 0.007175537 | 0.007175381 | 2.031390145 | 2.031903457 |
| 3.09006661  | 0.018781109 | 0.01878069  | 2.671156204 | 1.661089828 |
| 3.430692459 | 0           | 0           | 2.062437952 | 0.987583552 |
| 4.122374715 | 10.7525095  | 10.75364201 | 2.708945069 | 0.091566096 |
| 1.614200664 | 2.355229956 | 2.355229963 | 2.031282464 | 0.006977957 |
| 3.698997504 | 0           | 0           | 2.026945191 | 0           |
| 3.681068161 | 0           | 0           | 0.747689103 | 3.180802949 |
| 4.86005512  | 0.000401473 | 0.000401464 | 2.323771388 | 3.809428205 |
| 1.528614295 | 0.173905536 | 0.173900256 | 2.639774689 | 2.660791707 |
| 3.852348584 | 0.905053868 | 0.905053136 | 2.66944635  | 0           |
| 3.671413322 | 0.227667323 | 0.22765977  | 2.799349333 | 1.674781856 |
| 1.81468426  | 0           | 0           | 2.129778007 | 2.126679814 |
| 2.71045616  | 5.284949777 | 5.284950941 | 2.711855126 | 1.503312576 |
| 4.206835631 | 0.043059545 | 0.043058531 | 2.509303576 | 3.666876522 |
| 2.795182321 | 0.04667824  | 0.046677132 | 2.79166361  | 2.529290618 |
| 2.446165177 | 0.259164537 | 0.259155512 | 1.742158097 | 1.756201081 |
| 3.042181863 | 0           | 0           | 3.625860204 | 0           |
| 2.718663863 | 0.815500353 | 0.815498932 | 1.750394776 | 0           |
| 1.121738315 | 2.158588085 | 2.1585883   | 0.033127104 | 2.158420267 |
| 0.177435437 | 0.192966207 | 0.192960156 | 2.697953799 | 1.582271865 |
| 2.471986832 | 0           | 0           | 1.536655713 | 2.777598074 |
| 3.844247885 | 0.055394199 | 0.055392859 | 2.827639274 | 2.565701166 |
| 2.192348405 | 0.171522761 | 0.171517575 | 2.183101449 | 2.197955767 |
| 3.67270392  | 0           | 0           | 4.55738463  | 0           |
| 3.601149241 | 0           | 0           | 2.624201984 | 3.91413291  |
| 2.684460305 | 0.021420999 | 0.021420519 | 1.071448976 | 0.020886264 |
| 2.140754012 | 0           | 0           | 1.258732313 | 0           |
| 3.016439476 | 0           | 0           | 0.802022715 | 1.340187145 |
| 3.096466142 | 0.123618482 | 0.123615052 | 2.813700547 | 3.706861298 |
| 4.17206558  | 0           | 0           | 3.141540317 | 1.519796399 |
| 1.944137801 | 0.338916456 | 0.338903232 | 2.629592449 | 5.413738253 |
| 2.323959174 | 0.000436871 | 0.000436862 | 2.323933819 | 0.000426483 |
| 1.769782743 | 1.773537055 | 1.773540606 | 2.448573283 | 5.206178311 |
| 4.894742718 | 1.603112102 | 1.603115503 | 2.722837336 | 0.194258677 |
| 2.980360468 | 0           | 0           | 2.147327246 | 1.430141472 |
| 2.38882537  | 5.121139767 | 5.121138912 | 3.978369272 | 0.014284946 |
| 3.516935447 | 1.216396627 | 1.216394556 | 3.334796349 | 1.891600151 |
| 2.320990175 | 0           | 0           | 0.57622143  | 0.578857215 |
| 3.101660885 | 0           | 0           | 2.120804786 | 1.406980621 |
| 3.72752843  | 6.544399486 | 6.544392594 | 2.697790843 | 1.291633922 |
| 2.542606844 | 0           | 0           | 4.125349309 | 8.142604525 |
| 1.671175454 | 0.021383793 | 0.021383314 | 2.682765021 | 1.07138181  |
| 2.302161927 | 0           | 0           | 2.492297702 | 3.160295449 |
| 2.328402968 | 0.825458842 | 0.825457497 | 2.5489207   | 3.964633279 |
| 1.98536094  | 0.988964955 | 0.98896487  | 3.153888338 | 1.98528521  |
| 1.261906571 | 3.278964137 | 3.278965701 | 1.952401025 | 0           |
| 3.641836476 | 0           | 0           | 2.956482997 | 1.568512899 |
| 2.809757923 | 0           | 0           | 2.994444375 | 1.382089834 |
| 1.039859294 | 1.039537191 | 1.039537491 | 1.039763728 | 0.011549379 |
| 3.416067146 | 0           | 0           | 4.689426581 | 5.157166074 |
| 2.631079967 | 0           | 0           | 2.155614838 | 1.437397972 |
| 0           | 0           | 0           | 2.425585755 | 0.888048733 |
| 1.144691818 | 5.269896577 | 5.245352642 | 0           | 0.651193917 |
| 4.933907428 | 0.015027947 | 0.015027615 | 1.645466096 | 2.066243399 |
| 1.684119904 | 4.373842169 | 4.37384103  | 2.921431501 | 0.024052891 |
| 3.00164251  | 0           | 0           | 3.584823722 | 0           |

|             |             |             |             |             |
|-------------|-------------|-------------|-------------|-------------|
| 4.043912435 | 0.287217107 | 0.287206681 | 1.809608623 | 5.095851502 |
| 2.948444126 | 0           | 0           | 0.990561408 | 2.323219899 |
| 1.742171633 | 1.349856221 | 1.349854972 | 2.882387191 | 2.708747993 |
| 2.579937803 | 0           | 0           | 2.801369983 | 1.862918498 |
| 3.309073918 | 0.02916603  | 0.029165364 | 2.451013524 | 4.052010429 |
| 3.631928906 | 0.106369533 | 0.106366678 | 3.775366072 | 1.984518805 |
| 2.969412366 | 2.562971443 | 2.562971834 | 3.194768548 | 1.769735227 |
| 2.674608501 | 0           | 0           | 3.135483857 | 3.454259797 |
| 4.888509024 | 0.005960008 | 0.005959879 | 2.02611098  | 0.005816423 |
| 3.56572409  | 0.052327428 | 0.05232617  | 2.547134084 | 0.050930218 |
| 3.119589688 | 0.070194169 | 0.070192417 | 1.852537888 | 0.068249546 |
| 3.192787879 | 8.992149946 | 8.969011983 | 2.994596322 | 1.136413451 |
| 3.210933013 | 0.093127325 | 0.09312489  | 0.082846323 | 1.938566242 |
| 2.041539827 | 1.031510138 | 1.031510378 | 2.364672755 | 3.506867414 |
| 3.456947714 | 0.028075704 | 0.028075065 | 2.119826018 | 3.72349975  |
| 4.069350472 | 0.081159508 | 0.081157436 | 1.891168768 | 2.334499448 |
| 1.878310347 | 0           | 0           | 1.88167207  | 0           |
| 1.769012977 | 1.152744954 | 1.152746083 | 1.767323623 | 0.04553631  |
| 1.786364534 | 0           | 0           | 2.429375292 | 0           |
| 2.101432692 | 1.183901805 | 1.183899526 | 3.566258189 | 1.55555856  |
| 2.284335436 | 0.068746556 | 0.068744845 | 2.881328934 | 6.189336507 |
| 1.45497351  | 6.32620324  | 6.337248999 | 1.993272107 | 0           |
| 2.50312532  | 0.040922898 | 0.040921939 | 1.134601027 | 1.134880684 |
| 5.252837942 | 0.042902437 | 0.042901427 | 1.140914187 | 2.513307508 |
| 3.667524955 | 0.164476838 | 0.164471925 | 1.498339237 | 1.503942742 |
| 2.089250899 | 0.020494971 | 0.020494513 | 2.088247794 | 0.019984422 |
| 1.922729566 | 0           | 0           | 2.242101112 | 1.513672751 |
| 3.716562833 | 0           | 0           | 2.985067034 | 0           |
| 1.589819846 | 5.983632592 | 5.983632511 | 2.32734409  | 0.001152696 |
| 3.706146972 | 0.322293731 | 0.322281437 | 2.589554029 | 0.308862942 |
| 3.822697946 | 0.212122169 | 0.212115304 | 1.624316003 | 0.20456986  |
| 2.78369899  | 0           | 0           | 4.246100597 | 0.751821325 |
| 2.886013417 | 0.016549534 | 0.016549167 | 1.05539623  | 1.055421501 |
| 2.483490201 | 0.123253792 | 0.123250375 | 2.032666123 | 0.119473711 |
| 3.062655609 | 1.182485096 | 1.182482808 | 2.501292946 | 0.678375329 |
| 3.904160296 | 0.019589989 | 0.019589552 | 1.663462249 | 0.019102983 |
| 2.588223572 | 0.061559616 | 0.061558108 | 1.821563204 | 6.791559716 |
| 2.602251124 | 0           | 0           | 2.608854838 | 0           |
| 1.393968865 | 0           | 0           | 3.224990875 | 2.35855662  |
| 2.458530744 | 0           | 0           | 2.909155353 | 1.15259448  |
| 2.09304647  | 0           | 0           | 0.837632238 | 0           |
| 6.147487885 | 0.371657558 | 0.371642413 | 2.001267695 | 2.754491228 |
| 0.900020776 | 7.352512586 | 7.320633099 | 2.663365101 | 2.659964303 |
| 3.754513281 | 0.09813616  | 0.098133567 | 2.388206389 | 1.956058947 |
| 2.932523679 | 0           | 0           | 3.102942482 | 1.938768108 |
| 0.600997183 | 0           | 0           | 1.081631376 | 0           |
| 3.179569852 | 0.085123378 | 0.085121188 | 2.944967555 | 4.093227834 |
| 4.143790788 | 1.23495352  | 1.234955207 | 4.329267435 | 0.071072016 |
| 2.334135464 | 3.15887236  | 3.158867751 | 3.393015077 | 1.652511049 |
| 3.04971319  | 7.944212167 | 7.935791074 | 1.347580965 | 0.107523225 |
| 5.400168083 | 0           | 0           | 2.316044886 | 0.814213719 |
| 3.840714039 | 0.470861805 | 0.4708581   | 2.276443712 | 0.467579818 |
| 2.470414856 | 1.373876943 | 1.373879454 | 3.823605856 | 5.862912309 |
| 2.831851923 | 0.232767907 | 0.232760123 | 3.156846197 | 0.224214926 |
| 5.028469419 | 0.114213466 | 0.114210354 | 3.804344809 | 2.011300878 |
| 1.345704309 | 0.109451392 | 0.109448437 | 2.42805525  | 0.106178892 |
| 4.10067461  | 0           | 0           | 2.142146969 | 1.757146978 |
| 3.556179602 | 0.132666072 | 0.132662329 | 3.117410242 | 0.128527745 |

| hsa-miR-34b-3p | hsa-miR-643 | hsa-miR-130b-3p | hsa-miR-130a-5p | hsa-miR-765 |
|----------------|-------------|-----------------|-----------------|-------------|
| 0.104173996    | 2.025214953 | 7.325840558     | 3.075621546     | 0.093300431 |
| 1.615034745    | 2.030896649 | 9.28006523      | 2.840906996     | 1.024638121 |
| 0              | 0.378404187 | 5.255142061     | 0               | 1.381991609 |
| 1.417093996    | 2.619942871 | 7.908626864     | 1.82209723      | 0.864188361 |
| 1.057597624    | 2.070013041 | 5.552650054     | 1.056835351     | 1.650918481 |
| 1.725960829    | 1.72071685  | 6.921228567     | 1.723256906     | 1.116264243 |
| 0.195602211    | 0.171838968 | 6.411683121     | 0.182646913     | 0.172161495 |
| 2.636368332    | 2.661660844 | 6.288411861     | 2.502343974     | 2.165181776 |
| 0              | 0.770202215 | 6.388422965     | 0               | 1.305693375 |
| 0              | 3.075229418 | 8.935805136     | 2.426086292     | 1.961763094 |
| 0.104011632    | 0.093005802 | 4.605113165     | 2.472229575     | 2.02490575  |
| 0.088406333    | 0.079298037 | 5.960452115     | 1.337063228     | 1.96422654  |
| 0              | 1.528123627 | 5.6469703       | 1.938188477     | 1.939282048 |
| 1.243769288    | 1.85735212  | 6.846018715     | 0.058701125     | 2.616531459 |
| 0              | 0           | 6.439873185     | 0.969010785     | 2.54416834  |
| 0.071053266    | 0.063955805 | 6.62853002      | 1.273500643     | 1.26911072  |
| 0.705746654    | 1.922165341 | 7.896836589     | 2.38364402      | 0           |
| 1.333368323    | 3.514435713 | 5.985484374     | 0               | 0.797625578 |
| 0.117053599    | 0.104398296 | 7.170332387     | 0.110204851     | 2.074384499 |
| 0              | 0.96455952  | 7.681008752     | 0.964131694     | 1.542867535 |
| 0.330981887    | 0.283769424 | 7.183944553     | 0.304931511     | 0.284393713 |
| 2.043088373    | 2.457878645 | 4.774171983     | 3.072133173     | 2.790481443 |
| 0              | 1.858268131 | 6.202196906     | 0.888289121     | 0.889460681 |
| 0.174437152    | 0.153859453 | 7.21939033      | 1.635542351     | 0.154139927 |
| 0              | 0.866744011 | 5.094039991     | 0               | 2.14404972  |
| 1.216388206    | 0.452105282 | 7.132352193     | 1.502608093     | 2.907927687 |
| 1.037424972    | 1.036461954 | 7.427769715     | 0.008829707     | 1.036477299 |
| 0.162204777    | 1.581893201 | 5.438269893     | 1.594680926     | 2.237773857 |
| 1.183700496    | 0.04192846  | 6.893841821     | 0.043972323     | 1.178224932 |
| 0              | 0           | 8.308029755     | 0.791607652     | 0.79352098  |
| 3.333366076    | 0.096301857 | 8.606490339     | 1.406624494     | 0.096460411 |
| 0.029082775    | 1.112992244 | 5.771635708     | 1.719463575     | 2.465910379 |
| 0.053287104    | 2.249178029 | 6.088768618     | 2.254813345     | 1.204033138 |
| 2.113847771    | 0.680853233 | 6.744568758     | 0.678283891     | 1.19261834  |
| 1.668660577    | 0           | 6.399401782     | 1.67379134      | 0           |
| 0              | 2.437998102 | 5.966152628     | 1.264910584     | 2.626637873 |
| 0.087998121    | 1.329700154 | 6.820456793     | 1.335581744     | 1.329884937 |
| 1.656779793    | 1.654246099 | 7.482742276     | 1.655477797     | 0.013715188 |
| 0.040779532    | 2.786812297 | 4.713524626     | 0.038713502     | 1.768050153 |
| 2.437951097    | 1.086621699 | 5.787527852     | 2.435225467     | 0.020211286 |
| 0              | 0.855408802 | 4.561789024     | 0.853896359     | 0           |
| 1.025204357    | 1.613934641 | 7.984030539     | 2.031427835     | 2.030837331 |
| 1.424563595    | 0.098675152 | 6.047213574     | 2.832149283     | 0.098838342 |
| 0.154984607    | 0.137211426 | 6.095692523     | 2.228031151     | 1.558651209 |
| 2.151852879    | 3.165975204 | 6.764718857     | 0.122738003     | 0.116328921 |
| 0.915779519    | 0.917638351 | 7.087329471     | 0               | 3.056012982 |
| 1.798929612    | 1.759096282 | 7.961978145     | 0.203308603     | 0.191282952 |
| 0.094297283    | 1.987047186 | 7.125341155     | 0.088997342     | 1.987327201 |
| 0              | 1.410367779 | 5.996653449     | 1.407849034     | 2.38653909  |
| 0.175775967    | 0.155000868 | 5.568313794     | 3.083927005     | 0.155283958 |
| 1.963324325    | 0.075459795 | 6.989076772     | 1.321233325     | 1.315848858 |
| 0              | 0           | 6.188983166     | 3.328032088     | 0           |
| 1.374915794    | 2.136150759 | 5.079000859     | 1.672936326     | 2.135812485 |
| 0.134879019    | 2.579159597 | 4.939798553     | 2.594755204     | 2.140298756 |
| 0.026776018    | 1.70681279  | 7.440641782     | 1.105662512     | 2.454884376 |
| 0.782957219    | 0.786918856 | 5.929781752     | 0.784897262     | 1.721506716 |

|             |             |             |             |             |
|-------------|-------------|-------------|-------------|-------------|
| 0.092001996 | 0.082463912 | 5.070834568 | 1.986875062 | 1.978354987 |
| 0           | 0.639524946 | 5.592536532 | 1.134644809 | 0.639435803 |
| 0.005864667 | 2.029013986 | 6.83339262  | 1.023421488 | 3.031028557 |
| 1.061483188 | 0.013905693 | 6.786814657 | 2.07620328  | 2.0747312   |
| 2.084009956 | 1.654106794 | 6.932952656 | 1.645209418 | 0.537031697 |
| 0.074264372 | 2.669591759 | 7.780790005 | 0.070242935 | 1.280723288 |
| 1.023640664 | 2.028914635 | 7.481861159 | 2.352383701 | 1.023051856 |
| 0           | 0           | 6.291186535 | 2.764956499 | 0.637125807 |
| 0.750373137 | 1.286399289 | 5.654582119 | 1.980912038 | 0           |
| 1.001334963 | 2.001639525 | 6.716447126 | 1.586527952 | 0.000300991 |
| 0.132565691 | 0.117874401 | 7.203026645 | 0.124603363 | 0.118076346 |
| 1.471316547 | 1.882055184 | 7.949494295 | 1.473063707 | 2.460421431 |
| 1.635252327 | 1.606856931 | 5.913145002 | 0.159069179 | 0.150258288 |
| 1.419850404 | 0.866439418 | 8.603801578 | 1.422265275 | 0           |
| 0           | 1.508551952 | 5.978206598 | 1.507347753 | 1.508513914 |
| 0.034651064 | 1.741397521 | 5.921738944 | 0.032917888 | 3.175835875 |
| 1.149307495 | 0.033990809 | 6.614908575 | 0.035617778 | 1.753898777 |
| 1.707715854 | 1.674455739 | 6.23598969  | 1.690299163 | 2.336428675 |
| 2.0757357   | 1.372295029 | 8.182811966 | 1.767561789 | 0           |
| 0.815979022 | 3.326259167 | 7.892756259 | 1.761774993 | 0           |
| 1.724814326 | 2.142623975 | 7.381848422 | 0.028208399 | 1.719696223 |
| 0.145982239 | 0.129466162 | 7.956673236 | 0.137019547 | 1.528913    |
| 0.665561864 | 2.114052684 | 5.797665971 | 1.855534683 | 1.862502134 |
| 0.044342898 | 2.537115529 | 5.448638647 | 1.787110358 | 2.537273209 |
| 0.130874215 | 1.478025552 | 8.339716002 | 2.913946155 | 0.116607712 |
| 0           | 1.563990965 | 7.309769298 | 0.982081514 | 0           |
| 0           | 2.654083742 | 6.12730295  | 1.287360149 | 0.758407248 |
| 0.017399488 | 1.068099389 | 6.435726761 | 3.092687644 | 0.015857125 |
| 2.477160444 | 0.486587032 | 6.381095833 | 2.346694491 | 1.285803099 |
| 0           | 2.320061902 | 5.190776132 | 3.041593463 | 2.319902331 |
| 0.096173845 | 0.086131509 | 7.791633137 | 1.365128928 | 1.994635887 |
| 3.548406965 | 2.313512702 | 5.31983388  | 2.30468569  | 1.167191097 |
| 0.242452398 | 0.211158294 | 5.693347493 | 0.225318511 | 0.211579133 |
| 0.000358116 | 1.001416838 | 6.872761798 | 2.001818607 | 0.000327523 |
| 2.396954068 | 0.172048493 | 4.512180541 | 1.705912485 | 2.352407032 |
| 3.516087588 | 1.547764737 | 6.781399024 | 0.142382815 | 1.548129087 |
| 0.875855121 | 0           | 5.572798065 | 0.877137825 | 1.439167168 |
| 2.061032107 | 1.640093852 | 8.622001326 | 3.064049436 | 0.010885283 |
| 0           | 0           | 6.525624328 | 1.226650152 | 2.175611137 |
| 0.578904335 | 1.72972905  | 5.785149471 | 0           | 3.519182856 |
| 1.813596978 | 0.860313649 | 5.846311165 | 2.131808704 | 0.860266079 |
| 0.071977148 | 1.898295903 | 8.993202719 | 1.276915259 | 0.064875534 |
| 0           | 2.284447863 | 6.080704505 | 2.767848484 | 0           |
| 0.017369547 | 1.664774251 | 4.280016098 | 2.086454958 | 2.409241832 |
| 0.674140251 | 2.342260579 | 5.282738158 | 2.119437313 | 0           |
| 0           | 1.379202404 | 6.389005191 | 3.074048272 | 1.379110814 |
| 2.307460083 | 1.57235799  | 8.699569619 | 0           | 1.986560716 |
| 0           | 0.747374931 | 7.215319114 | 1.970179733 | 0           |
| 0.955730882 | 3.118112639 | 6.579634411 | 0           | 1.607251099 |
| 1.400982271 | 0.39970844  | 7.356142277 | 2.317831632 | 0.399611936 |
| 1.038983323 | 2.047546443 | 7.086296959 | 1.630469702 | 2.047576076 |
| 5.683636085 | 0.52992525  | 5.383906935 | 2.427601447 | 0.994796433 |
| 0.881641767 | 1.446144668 | 6.632893688 | 1.444074997 | 0           |
| 0.889419139 | 0.891774136 | 7.08929159  | 2.435389703 | 0           |
| 0.652065669 | 0           | 5.701218559 | 1.534466699 | 0.657104895 |
| 2.3866679   | 2.383837795 | 5.289188721 | 2.385191069 | 2.060117851 |
| 1.080373808 | 1.078199417 | 5.9113675   | 1.079279784 | 1.676722004 |
| 2.040113357 | 1.341875701 | 9.155511422 | 0.797228749 | 0.79910557  |

|             |             |             |             |             |
|-------------|-------------|-------------|-------------|-------------|
| 0.209486755 | 0.183559524 | 5.389409123 | 1.749989606 | 1.732656466 |
| 2.374025804 | 0.321085868 | 5.312557901 | 1.681377442 | 0.320992817 |
| 1.355236608 | 2.548823666 | 8.350862504 | 2.543546005 | 0.814931364 |
| 2.733657622 | 1.715881662 | 7.862773452 | 1.907022407 | 1.715528938 |
| 2.119263534 | 1.09205033  | 5.707023415 | 2.442221091 | 2.928248542 |
| 0.083345272 | 1.943943172 | 8.305335677 | 0.078754244 | 2.70835037  |
| 2.03665914  | 0.632767413 | 9.438345115 | 2.045809966 | 1.130571125 |
| 0.421877647 | 0.854860875 | 5.774139453 | 1.69248929  | 1.468876429 |
| 1.608449446 | 1.607652077 | 6.261158622 | 1.019475343 | 1.019235189 |
| 2.80309706  | 1.161650396 | 5.850472082 | 0.039812621 | 2.526225837 |
| 1.220284472 | 2.260359596 | 7.42800405  | 0.052921794 | 0.050492453 |
| 1.133002105 | 0.03024189  | 7.563646931 | 0.031676809 | 1.129246358 |
| 0.073372266 | 1.277353173 | 5.806723964 | 0.06940589  | 2.666040025 |
| 3.502684781 | 0.007014216 | 7.399818186 | 1.030685087 | 0.007023769 |
| 0.022739291 | 1.088699574 | 9.028202016 | 1.69076858  | 1.088739076 |
| 0.064264247 | 1.866779507 | 7.283190095 | 2.63389574  | 0.058012973 |
| 1.894616332 | 3.140860615 | 5.822327923 | 2.72273462  | 1.218556732 |
| 0.037577668 | 0.034056172 | 8.307459038 | 0.035686517 | 1.145290654 |
| 2.052199572 | 1.819863781 | 5.61692523  | 1.812243468 | 2.91899863  |
| 0.680598263 | 0.685541586 | 7.319695102 | 1.19426746  | 1.19862183  |
| 0.054720691 | 1.209231972 | 6.803255762 | 1.212556668 | 1.827300592 |
| 1.100104712 | 2.029070733 | 5.955209873 | 2.232090413 | 2.028789508 |
| 0.032961827 | 1.127752065 | 7.245827814 | 2.161175382 | 0.029944332 |
| 1.137656399 | 0.031311069 | 5.541613742 | 3.503065079 | 2.165093405 |
| 0.125853684 | 0.112053151 | 5.778494711 | 0.118378896 | 0.112243112 |
| 0.016653995 | 1.661543116 | 4.565895413 | 2.895494977 | 0.015180044 |
| 1.516139872 | 1.928801619 | 4.993254923 | 0.943319553 | 1.928760455 |
| 1.046451733 | 2.174013725 | 9.628659171 | 1.051565352 | 0.576245031 |
| 0.00096764  | 1.003826856 | 6.826649768 | 0.000922712 | 0.000884865 |
| 0.231989724 | 0.202433338 | 6.725815759 | 0.215822506 | 0.202831622 |
| 0.159264989 | 0.14088498  | 6.525723444 | 1.584786992 | 0.141136267 |
| 0           | 1.290138231 | 7.677544647 | 0.755484011 | 0.757613127 |
| 1.054279731 | 1.647112152 | 6.355272318 | 2.067355195 | 0.012286841 |
| 1.371065085 | 0.085894887 | 4.813191161 | 1.364159595 | 1.357822291 |
| 0           | 1.883485962 | 8.26095734  | 1.573631378 | 0.684359807 |
| 0.015924866 | 1.658245769 | 5.747666275 | 0.015159965 | 0.014517627 |
| 1.812695371 | 0.044437617 | 4.695540067 | 0.046616158 | 1.188671624 |
| 0           | 0           | 8.505005873 | 0.648964347 | 0.65154901  |
| 1.799650299 | 0.850078912 | 5.849148413 | 2.375928016 | 1.404534199 |
| 1.835921767 | 2.818347686 | 6.547245914 | 0           | 1.850663738 |
| 1.390436538 | 0           | 6.084994585 | 0.841344227 | 1.395804566 |
| 0.26269438  | 0.227949629 | 5.076031199 | 0.243636802 | 2.565055147 |
| 0           | 1.876848902 | 7.621923843 | 0.90267719  | 0.90371718  |
| 0.077157386 | 1.290989246 | 6.427189381 | 0.072956288 | 0.069472978 |
| 0.954726028 | 1.532412144 | 6.731998237 | 2.938372592 | 0.955760705 |
| 2.70309145  | 1.099113765 | 4.539242536 | 1.759582403 | 0.608430977 |
| 1.26397738  | 2.907016497 | 6.087971459 | 0.063695657 | 0.060708508 |
| 1.852075574 | 1.221639829 | 7.271208187 | 0.055038288 | 2.599320904 |
| 1.615264256 | 2.243954545 | 7.69517922  | 0.153758633 | 1.588556407 |
| 2.744086013 | 0.077787097 | 5.652234731 | 3.885263503 | 1.957458938 |
| 3.973306718 | 1.765477121 | 8.09242355  | 2.331462356 | 0.819343277 |
| 0.466020903 | 1.262482154 | 7.086597422 | 2.46271798  | 3.135836466 |
| 1.360807505 | 0.083455985 | 7.5650303   | 2.427373494 | 1.348047761 |
| 3.100327855 | 2.718147821 | 4.652505016 | 0.16225163  | 1.618451257 |
| 0.089201548 | 1.967095949 | 6.030791513 | 1.339947338 | 1.967358912 |
| 1.970018184 | 0.076868742 | 7.610775939 | 1.327049724 | 0.076990626 |
| 0           | 1.281547374 | 7.431677472 | 0.480778241 | 1.281301589 |
| 0.102830858 | 1.381858968 | 8.226560954 | 1.388996416 | 1.382082575 |

| hsa-miR-939-5p | hsa-miR-1226-3p | hsa-miR-4742-3p | hsa-miR-219b-3p | hsa-miR-520f-3p |
|----------------|-----------------|-----------------|-----------------|-----------------|
| 2.506718817    | 1.417389013     | 2.06379505      | 0.094466422     | 0.136969385     |
| 1.615782954    | 1.616134803     | 1.615790212     | 1.024715129     | 0.007753587     |
| 1.34995284     | 3.582844169     | 1.349839548     | 0.784823772     | 0               |
| 3.113865013    | 2.382697701     | 2.963174599     | 0.863839486     | 3.23980485      |
| 2.400041775    | 1.655900469     | 2.400069809     | 1.056285629     | 0.017828724     |
| 0.032495559    | 1.7318214       | 1.121844493     | 1.116665819     | 0.037651454     |
| 2.890238049    | 1.765247799     | 2.890742927     | 1.693101284     | 1.768827172     |
| 2.127801284    | 3.170157219     | 1.391199667     | 1.413263305     | 0               |
| 2.458725829    | 0.763363288     | 2.813052792     | 1.304819208     | 0               |
| 1.63595527     | 5.535526157     | 3.043398361     | 3.311880371     | 2.183117203     |
| 1.411790754    | 0.121966973     | 1.411895514     | 0.094321865     | 0.136742492     |
| 2.770833641    | 2.002930757     | 2.435721066     | 0.080390324     | 0.115139826     |
| 2.73714253     | 2.253360592     | 3.098313498     | 0.952032447     | 0               |
| 1.24920671     | 1.251444194     | 1.249256587     | 0.056623943     | 1.884269796     |
| 3.275954055    | 4.536470337     | 3.275933895     | 0.969280912     | 0               |
| 1.284723209    | 0.082422658     | 2.68868951      | 0.064809678     | 1.926546382     |
| 1.59686606     | 3.111352773     | 1.596789767     | 2.389340325     | 5.807172732     |
| 2.690735832    | 2.851625631     | 2.857599224     | 1.339142236     | 0               |
| 2.118296195    | 1.467299778     | 2.901881562     | 1.433274472     | 0.155109707     |
| 1.540494824    | 2.271169118     | 1.540485292     | 0.964442472     | 0               |
| 2.220762514    | 0.418503749     | 2.221459768     | 2.096342371     | 0.503133911     |
| 1.409227985    | 1.414143199     | 2.503214544     | 1.385558763     | 0.135803493     |
| 2.834061678    | 1.84741723      | 1.84927855      | 1.45211742      | 0               |
| 1.674076197    | 1.685966284     | 1.674311971     | 1.625220694     | 0.239473085     |
| 2.38981273     | 3.87363313      | 2.798963567     | 1.827611604     | 0               |
| 2.244292734    | 2.50323197      | 2.943614952     | 1.229712924     | 0               |
| 3.961779743    | 6.186614841     | 4.054999222     | 1.628112146     | 0.011521389     |
| 0.180669216    | 2.777100105     | 2.303966808     | 0.145629025     | 0.220988672     |
| 2.236742077    | 3.262368452     | 3.580497363     | 1.178880646     | 0.058873767     |
| 1.715500755    | 2.490327026     | 2.850985036     | 0               | 0               |
| 1.426127116    | 2.088777055     | 2.522988649     | 1.401084468     | 0.142017366     |
| 2.478325094    | 4.697892702     | 3.867683141     | 2.466683085     | 5.770541251     |
| 1.214967743    | 1.842443098     | 3.291639559     | 2.57933584      | 10.73165707     |
| 2.314122812    | 1.848002331     | 1.553768095     | 0.680138899     | 3.767616586     |
| 2.219965462    | 2.930756173     | 0.748827564     | 1.677386527     | 0               |
| 2.411748081    | 3.961565351     | 2.196815472     | 0               | 0               |
| 2.433672797    | 2.443407919     | 2.433854456     | 1.331282593     | 0.114580122     |
| 1.658646469    | 2.080393122     | 2.07913508      | 2.39816722      | 1.06112052      |
| 0.044372416    | 2.213208774     | 1.165331337     | 1.768889059     | 0.051631795     |
| 1.693103508    | 0.025343423     | 1.693131389     | 1.086950262     | 0.02780329      |
| 2.372820542    | 2.112269892     | 1.802057936     | 2.386493414     | 0               |
| 0.006736157    | 1.025743771     | 2.033070624     | 1.024652224     | 1.025384769     |
| 1.436440057    | 0.129844442     | 1.43655483      | 1.410543562     | 6.956174749     |
| 2.274624663    | 1.612478406     | 1.602996048     | 1.561490029     | 0.210208261     |
| 1.512044796    | 2.187516767     | 2.174955085     | 1.479525528     | 7.079857975     |
| 1.888014476    | 2.463151296     | 2.205193166     | 1.486255834     | 0               |
| 1.831576638    | 0.265756611     | 1.831918366     | 0.194114122     | 0.308009167     |
| 3.297568552    | 1.378888594     | 2.462528651     | 0.085658243     | 0.123247404     |
| 3.35986032     | 3.094107795     | 2.780414012     | 1.811747229     | 9.396559025     |
| 1.6789507      | 1.69100164      | 0.196541185     | 0.157452952     | 0.241513192     |
| 3.248764072    | 1.983391842     | 3.021477204     | 0.076491239     | 0.10918609      |
| 0.744866062    | 0.744480809     | 0.744850149     | 0.750960895     | 0               |
| 2.837820458    | 4.530053049     | 3.407774153     | 1.38752156      | 0               |
| 1.528217888    | 2.657672832     | 1.528374048     | 1.494198991     | 0.180686271     |
| 1.714942398    | 1.109849647     | 1.714976745     | 1.104583471     | 1.108465582     |
| 1.706081238    | 2.263845723     | 1.315032557     | 0.786360428     | 0               |



|             |             |             |             |             |
|-------------|-------------|-------------|-------------|-------------|
| 3.286712469 | 3.497905411 | 1.365917063 | 1.345541366 | 0.120081669 |
| 2.592727464 | 2.98487532  | 1.493121813 | 0           | 0.638046457 |
| 3.619620532 | 2.031602405 | 2.61805466  | 1.023203526 | 0.00727603  |
| 1.062531522 | 2.895791103 | 3.410435216 | 0.014071859 | 0.019051552 |
| 2.247396615 | 1.61777166  | 1.861778559 | 1.651693094 | 0           |
| 2.703946743 | 1.939093402 | 2.370356391 | 1.281861709 | 11.39576078 |
| 2.031015321 | 3.494751232 | 3.033831867 | 2.838224214 | 4.497174618 |
| 2.241190494 | 3.472118493 | 2.869068882 | 1.13516949  | 0           |
| 2.936922964 | 1.656967228 | 1.273602273 | 1.676288853 | 0           |
| 0.000355307 | 2.323785979 | 0.000355611 | 1.00130657  | 0.000407003 |
| 1.519574545 | 3.494082974 | 0.146989135 | 1.486360721 | 0.17733571  |
| 2.450752885 | 1.87282335  | 0.904471231 | 0.907473918 | 0           |
| 0.189518775 | 2.353105204 | 1.657751385 | 0.152339421 | 0.232583535 |
| 3.253773803 | 3.112851903 | 3.253688713 | 1.423974238 | 0           |
| 2.231241015 | 3.898650746 | 2.904417348 | 3.495297758 | 5.978831936 |
| 3.364860772 | 4.729842098 | 4.369154663 | 2.758986544 | 0.043715213 |
| 1.152222047 | 0.04303159  | 2.193187493 | 0.034416222 | 0.047394774 |
| 1.73432763  | 1.748293305 | 0.214264352 | 1.678660722 | 0.26504646  |
| 3.049549417 | 2.538054269 | 2.324950826 | 2.083523769 | 0           |
| 0           | 2.887125669 | 1.356756615 | 1.764584483 | 0.816614428 |
| 1.728707587 | 2.484667276 | 2.481484186 | 2.734990382 | 3.34798266  |
| 0.162095228 | 1.578255318 | 0.162287768 | 2.18391811  | 0.196899937 |
| 1.837247865 | 4.083887305 | 2.64641934  | 2.111900221 | 0           |
| 3.569770216 | 2.231159686 | 1.179531855 | 1.784265671 | 0.056261012 |
| 2.962590408 | 0.154830135 | 2.176286487 | 2.128750655 | 0.174891778 |
| 2.297056082 | 1.562537261 | 2.297047843 | 0.982240227 | 0           |
| 3.202213834 | 3.194146248 | 3.202066168 | 0.757871118 | 0           |
| 1.670038599 | 4.011797012 | 2.905648467 | 1.665294498 | 0.021731381 |
| 2.153171862 | 1.966612019 | 0.478824223 | 1.56813254  | 0           |
| 3.284417825 | 4.968885352 | 2.518279224 | 1.749222988 | 0           |
| 1.381838871 | 2.481713004 | 3.30667634  | 0.087334089 | 0.125842085 |
| 2.46608412  | 2.901576834 | 3.528120988 | 2.663892641 | 0           |
| 1.917030755 | 0.29763683  | 3.071676816 | 3.562230324 | 0.347562008 |
| 2.00191085  | 1.001482251 | 2.323915034 | 2.323779157 | 0.00044289  |
| 2.891218195 | 0.236732141 | 3.234379599 | 3.137384171 | 0.272512327 |
| 1.591010621 | 2.277627938 | 0.168933453 | 0.136518707 | 1.599863351 |
| 2.407291215 | 1.832000398 | 1.834013088 | 1.438650916 | 0           |
| 1.048913016 | 2.653180849 | 2.651809415 | 0.010999302 | 5.750146438 |
| 1.216815268 | 4.419021229 | 3.339950133 | 2.744569214 | 0.708321227 |
| 2.640467849 | 3.371600072 | 2.332445318 | 1.432635396 | 0           |
| 1.408781325 | 2.119502178 | 1.408749785 | 0           | 0           |
| 0.078791938 | 1.928671542 | 1.28838726  | 1.273553059 | 7.286438068 |
| 0.970187903 | 1.548608693 | 1.961191641 | 1.963521673 | 0           |
| 2.416494354 | 1.071480921 | 2.416528717 | 0.015997701 | 1.670904777 |
| 3.066125175 | 3.371605544 | 2.31113193  | 2.693524125 | 0           |
| 2.077173729 | 3.312987952 | 2.908259878 | 1.777842606 | 0           |
| 1.985625226 | 2.983933938 | 2.569653206 | 2.570762459 | 0           |
| 1.954956344 | 2.41618649  | 0.740586023 | 1.666161832 | 2.908869039 |
| 1.812329144 | 3.046049483 | 2.498061757 | 2.67701753  | 0.509958813 |
| 3.299100552 | 2.393272822 | 2.919267012 | 0.398894935 | 0           |
| 3.964046228 | 2.863620518 | 1.039629533 | 1.038114914 | 0.012006186 |
| 0.522021619 | 3.179073847 | 2.233976716 | 0.529108868 | 0.983755878 |
| 1.439012253 | 1.839936976 | 2.41570009  | 0           | 0           |
| 4.354305853 | 5.251095749 | 2.427049978 | 3.018447267 | 0           |
| 0.649516406 | 2.267291225 | 1.816208827 | 0.656452981 | 6.814147412 |
| 1.64505584  | 2.654930127 | 3.656721082 | 2.384198244 | 0.015242426 |
| 2.920016489 | 2.106496388 | 0.021708514 | 0.018423476 | 6.237969245 |
| 2.693090122 | 1.720398305 | 3.145492883 | 2.048821156 | 0           |

|             |             |             |             |             |
|-------------|-------------|-------------|-------------|-------------|
| 0.235450927 | 2.514127301 | 3.28849283  | 1.736842341 | 0.294018817 |
| 0.6897105   | 1.454628612 | 1.244535865 | 1.863277979 | 0           |
| 2.055971076 | 1.349291335 | 2.055899351 | 2.328642726 | 0           |
| 1.876270259 | 3.217731817 | 2.904925491 | 1.200776552 | 0           |
| 2.123164778 | 2.942832736 | 3.595382137 | 2.114933866 | 0.029596326 |
| 2.412325077 | 1.335957817 | 3.245579317 | 1.946035288 | 2.768791011 |
| 1.483212335 | 1.772447126 | 1.483128106 | 1.129385988 | 2.221005965 |
| 1.665330279 | 2.028172352 | 2.335615572 | 1.466550527 | 0           |
| 1.020038123 | 0.005532848 | 1.609035348 | 2.024268947 | 0.006043232 |
| 2.215097537 | 6.270955408 | 4.698911932 | 3.535471594 | 0.053140771 |
| 2.282822581 | 4.3221941   | 1.850314337 | 2.261935316 | 0.071328091 |
| 1.7460006   | 2.175397668 | 2.767334813 | 0.030617199 | 9.899483939 |
| 0.080340764 | 3.404173217 | 4.862624302 | 1.905761676 | 0.094704881 |
| 2.040743183 | 2.041378373 | 1.031591452 | 1.030397094 | 1.623238509 |
| 2.118714443 | 1.093412665 | 2.935009669 | 1.089036769 | 0.028488872 |
| 1.888422396 | 2.663418778 | 2.32323595  | 0.058688256 | 0.082501034 |
| 2.533592153 | 1.579662286 | 1.583272585 | 2.729175461 | 0           |
| 3.209252336 | 3.214710535 | 2.789574284 | 0.034482465 | 2.530226101 |
| 2.744781353 | 2.990009282 | 0           | 0.641597039 | 0           |
| 2.672129103 | 1.855297632 | 2.819910457 | 1.579519432 | 1.558178182 |
| 2.608706308 | 2.615158812 | 2.277536008 | 1.210131129 | 0.069853688 |
| 2.832692233 | 3.863363    | 3.360789963 | 0           | 6.537299886 |
| 1.744220411 | 3.360704558 | 1.134041465 | 1.734780087 | 0.041543048 |
| 2.506563255 | 3.003174828 | 3.655548931 | 1.74165051  | 0.043555482 |
| 2.940578899 | 2.958252392 | 3.442822962 | 0.113696817 | 0.167667339 |
| 1.666440763 | 1.667438889 | 1.068159524 | 0.015340676 | 0.020791289 |
| 3.614938159 | 2.91489044  | 1.514589596 | 0.943798039 | 0.942516849 |
| 2.991897249 | 1.681948898 | 2.625575058 | 0.575540844 | 0           |
| 1.589755781 | 0.001097096 | 2.005161545 | 1.589506567 | 6.52997897  |
| 3.650924738 | 1.900055    | 2.573938436 | 0.205887233 | 0.33032529  |
| 0.177294918 | 3.615174018 | 1.618761499 | 2.231365919 | 1.628754395 |
| 4.414405425 | 5.238355482 | 2.626362952 | 2.461871516 | 0           |
| 2.070956341 | 1.651825122 | 2.39560332  | 1.053048181 | 0.016786586 |
| 2.028049469 | 4.111502845 | 2.469800832 | 3.031786869 | 0.125469287 |
| 1.858721373 | 1.180507376 | 1.558999384 | 1.196129183 | 0.682303266 |
| 3.090995884 | 2.410425654 | 1.065194266 | 1.062616471 | 0.019872619 |
| 1.819592334 | 2.255213763 | 0.05361799  | 1.189372972 | 0.062535877 |
| 0.643927362 | 1.507192911 | 2.26532863  | 1.531046412 | 0           |
| 1.79469048  | 1.792268664 | 2.10745236  | 0           | 0           |
| 2.284084396 | 2.904598188 | 2.283941429 | 1.547030627 | 0           |
| 0.837952193 | 1.385136072 | 1.38666865  | 2.11033053  | 0           |
| 1.987626075 | 2.012497118 | 1.988094078 | 2.57196735  | 0.381571545 |
| 3.024529035 | 2.442349747 | 0           | 0.903456892 | 8.339147311 |
| 3.215376621 | 2.391949839 | 2.717941204 | 1.292338796 | 0.099815431 |
| 1.529453653 | 2.258532755 | 3.25532934  | 2.263659381 | 0           |
| 2.684425385 | 2.52829036  | 0.600616409 | 1.097727944 | 0           |
| 3.688287202 | 1.272553647 | 3.16701249  | 1.880846905 | 0.086541987 |
| 2.293625449 | 2.299466269 | 2.625479276 | 2.27180032  | 1.233528604 |
| 3.104401724 | 3.129278676 | 2.311665153 | 0.14730824  | 2.34363206  |
| 1.987988137 | 2.773939767 | 1.988128667 | 0.078855338 | 9.082303382 |
| 2.062481798 | 2.314144345 | 2.725033672 | 3.1996769   | 0           |
| 2.425378272 | 4.16394933  | 3.239674688 | 1.260374445 | 0           |
| 2.457040198 | 2.024028751 | 2.016186992 | 1.984864132 | 0.12163608  |
| 2.348037016 | 1.681916863 | 1.670388675 | 0.155352738 | 0.237835714 |
| 2.774546858 | 2.786067814 | 0.098075513 | 1.335575291 | 0.116230934 |
| 2.422921877 | 0.09983252  | 1.983568159 | 1.322891771 | 0.111366824 |
| 1.767947229 | 3.922695253 | 3.548622451 | 2.008353065 | 0.922657672 |
| 2.837430218 | 3.72444359  | 2.058040065 | 2.458916671 | 0.135093767 |

| hsa-miR-937-3p | hsa-miR-520h | hsa-miR-526b-5p | hsa-miR-519c-3p | hsa-miR-216a-3p |
|----------------|--------------|-----------------|-----------------|-----------------|
| 0.131030296    | 0.133943668  | 0.140006058     | 0.134514506     | 1.414790665     |
| 3.037737869    | 0.007622111  | 1.025102589     | 0.007647025     | 4.362137827     |
| 2.337518541    | 0            | 0.388683365     | 0               | 1.926500572     |
| 3.777186714    | 1.81106699   | 5.351883923     | 2.123286828     | 5.811428606     |
| 3.256412258    | 0.01751925   | 1.057318454     | 0.017577875     | 5.820870444     |
| 2.981502434    | 0.036968185  | 1.119432511     | 0.037097535     | 1.731951559     |
| 3.810141748    | 1.773041056  | 5.397998176     | 2.480566445     | 0.272313509     |
| 3.15808404     | 0            | 0               | 0               | 0               |
| 2.234134718    | 0            | 0.770199754     | 0               | 7.013581565     |
| 4.305133308    | 0            | 2.398166036     | 1.631759561     | 0               |
| 2.078651102    | 0.133723016  | 0.13977284      | 0.134292681     | 0.136818163     |
| 1.356691519    | 0.112695983  | 1.347929679     | 0.113157396     | 2.006402144     |
| 3.623883155    | 0            | 1.93462012      | 0               | 0.950917925     |
| 4.0649377      | 0.077884883  | 4.178438854     | 1.885308437     | 0.079498228     |
| 6.358827014    | 0            | 0               | 0               | 0               |
| 2.368406485    | 4.226297549  | 6.547335684     | 4.42166918      | 2.368508889     |
| 3.595778623    | 4.703107134  | 6.930861401     | 3.318351205     | 0               |
| 3.909261769    | 0            | 1.720919658     | 0               | 0               |
| 1.469424241    | 0.151571774  | 1.458120118     | 0.152238819     | 0.155198445     |
| 2.532082078    | 0            | 0.964057465     | 0               | 4.748399089     |
| 2.290746838    | 0.484729707  | 0.522250215     | 0.488154608     | 0.503603219     |
| 0.129926989    | 0.132809806  | 0.138807714     | 0.133374624     | 0.135878515     |
| 2.827783303    | 0            | 0.888586374     | 0               | 0               |
| 0.227235251    | 0.23321132   | 0.245815267     | 0.234388335     | 2.388276828     |
| 3.10931631     | 0            | 0               | 0.863293194     | 0               |
| 4.519720832    | 0.451330888  | 1.905969285     | 0               | 0.880658097     |
| 8.621726724    | 0.011324294  | 2.049699366     | 0.011361639     | 0.011526302     |
| 3.656623727    | 0.215371813  | 0.226668134     | 0.216428316     | 0.221129975     |
| 2.244492517    | 0.057755687  | 0.059988408     | 0.057967198     | 1.186796719     |
| 4.111909833    | 0            | 0               | 0               | 6.996387939     |
| 2.545822608    | 0.138851726  | 1.42254079      | 0.139448855     | 5.633481046     |
| 3.877410767    | 7.451211663  | 11.04702686     | 7.384524206     | 7.786674596     |
| 1.84466963     | 10.45506684  | 13.30440984     | 9.52902656      | 2.884821612     |
| 0.675080217    | 3.362353234  | 4.193931301     | 2.301267411     | 4.391074574     |
| 3.181700327    | 0            | 1.661679337     | 0               | 2.424565901     |
| 2.751268386    | 0            | 3.805060221     | 1.636216457     | 5.299102691     |
| 3.491774199    | 0.112150702  | 0.117013599     | 0.112609401     | 0.114640946     |
| 2.081253292    | 1.061564132  | 3.794321932     | 0.018496635     | 6.287753085     |
| 1.785130679    | 0.050666114  | 0.052593923     | 0.05084884      | 0.051655906     |
| 2.119243229    | 0.027309634  | 1.088779067     | 0.027403119     | 4.6001464       |
| 2.940863628    | 0            | 0               | 0               | 0.852725868     |
| 4.039268322    | 0.007602572  | 0.007863882     | 0.007627421     | 7.610997813     |
| 2.107783255    | 6.370730247  | 9.715334034     | 6.732509363     | 7.381055297     |
| 0.199928709    | 0.204955061  | 1.602855152     | 0.205943548     | 8.343305521     |
| 2.196973303    | 4.312371992  | 9.712759103     | 7.407667029     | 3.514141632     |
| 3.674252337    | 0            | 0               | 0               | 8.657075218     |
| 1.860595155    | 0.299120661  | 0.317068905     | 0.300787196     | 0.308233683     |
| 3.698351589    | 0.120591853  | 0.125909388     | 0.121093096     | 0.123313915     |
| 4.081171669    | 7.037217663  | 11.38982731     | 7.965575179     | 6.804641937     |
| 1.697492138    | 0.235178596  | 0.247930333     | 0.236369212     | 0.241672702     |
| 5.135822604    | 0.1068944    | 3.805562904     | 0.107327175     | 0.109243452     |
| 1.267679425    | 0            | 0.751865644     | 0               | 1.270317741     |
| 4.193155067    | 0            | 0               | 0               | 3.12087392      |
| 1.539037477    | 0.176381949  | 0.185022861     | 0.177192749     | 0.180794355     |
| 1.717485252    | 1.109250039  | 2.470495113     | 1.109133468     | 0.033640309     |
| 2.977354697    | 0            | 0               | 0               | 9.305741795     |

|             |             |             |             |             |
|-------------|-------------|-------------|-------------|-------------|
| 3.084261602 | 0.117509402 | 2.01789749  | 0.117994979 | 4.711193564 |
| 1.780401809 | 0           | 0           | 1.124374752 | 0.638122906 |
| 4.285107511 | 0.007152791 | 0.007398368 | 0.007176145 | 6.305412283 |
| 3.414905556 | 1.062504755 | 4.00298985  | 0.018782744 | 8.509118346 |
| 3.492900054 | 0.534673335 | 0           | 0           | 0           |
| 2.384226649 | 10.1653056  | 13.67925246 | 11.02897886 | 0.095956401 |
| 4.895380083 | 3.621538562 | 6.168009311 | 3.495840779 | 6.530378301 |
| 2.019827362 | 0.633287848 | 0           | 0           | 2.968785619 |
| 1.271701094 | 0.750159805 | 1.277626437 | 0           | 6.361949294 |
| 0.000393616 | 0.000400221 | 0.000413732 | 0.000401506 | 2.323809755 |
| 2.661631089 | 0.173134729 | 0.181566924 | 0.173926157 | 0.177441183 |
| 2.856597751 | 0           | 2.44734948  | 0           | 1.872405282 |
| 2.831009861 | 0.226565295 | 0.238675246 | 0.227696819 | 0.232735016 |
| 6.11473562  | 0.862831724 | 0.865563019 | 0           | 4.902189582 |
| 3.597449854 | 5.958466998 | 8.522759377 | 5.447077977 | 4.799491419 |
| 6.405332352 | 0.042911359 | 1.138110762 | 0.043063505 | 0.043735277 |
| 1.769408424 | 0.046516323 | 1.149373821 | 0.046682567 | 7.227081462 |
| 4.464759733 | 0.257847964 | 0.272354482 | 0.259199785 | 1.751176772 |
| 4.34801074  | 0           | 1.757323327 | 0.819803941 | 6.951126502 |
| 2.527586276 | 0           | 0.818921588 | 0           | 5.148434132 |
| 3.880910767 | 3.347464856 | 7.651774726 | 4.090031749 | 0.037348514 |
| 2.723152899 | 0.192083009 | 2.256754427 | 0.192989839 | 7.297080063 |
| 3.248534891 | 0           | 0.672514551 | 0           | 5.693717759 |
| 5.225487338 | 0.055198395 | 0.05732013  | 0.055399432 | 4.271532688 |
| 4.633945182 | 0.170765615 | 0.179046733 | 0.171543017 | 2.197516137 |
| 3.294161285 | 0           | 0.982023114 | 0.98166592  | 0           |
| 5.83073307  | 0           | 0           | 0           | 1.279111404 |
| 3.565748125 | 0.021350787 | 0.022109635 | 1.071091429 | 7.939854608 |
| 2.98773954  | 0           | 0.49363626  | 0           | 5.789780027 |
| 4.262116392 | 0           | 0           | 0           | 0           |
| 3.863307953 | 0.123117682 | 0.128573703 | 0.123631874 | 5.153012771 |
| 2.4515297   | 0           | 2.272348087 | 0           | 2.451211444 |
| 1.953199236 | 0.336988606 | 1.934451761 | 0.338968107 | 0.347829586 |
| 3.172124404 | 0.000435509 | 1.001441292 | 0.000436908 | 5.757255875 |
| 3.296145637 | 0.265030619 | 0.280113091 | 0.266435239 | 2.480517565 |
| 3.096211077 | 1.60356582  | 3.996095908 | 2.291188546 | 4.754173967 |
| 2.620451452 | 0           | 2.146094001 | 0.875186485 | 6.835607979 |
| 3.532778333 | 6.121508133 | 9.919899229 | 6.452386232 | 7.111575621 |
| 7.08582505  | 1.216109562 | 0.711798404 | 0           | 0.708384767 |
| 2.872613905 | 0           | 0           | 0           | 0.583968897 |
| 3.234743925 | 0           | 0           | 0           | 0.857667949 |
| 1.932205522 | 5.681251831 | 8.424031906 | 4.1237401   | 6.417335726 |
| 4.345677861 | 0           | 0           | 0           | 0           |
| 0.020944385 | 0.021313709 | 2.09257778  | 1.070969662 | 0.021703081 |
| 4.685888476 | 0           | 1.553143586 | 0           | 0.67712659  |
| 1.367495943 | 0           | 0           | 0           | 4.464537971 |
| 3.790341677 | 0           | 0           | 0           | 3.683319798 |
| 2.762422781 | 2.197812607 | 4.64681935  | 1.263418156 | 7.580760229 |
| 1.801321421 | 0           | 2.727760598 | 0           | 0           |
| 5.820664943 | 0.400064157 | 2.127071554 | 0           | 3.046385547 |
| 5.869234082 | 0.011800565 | 0.012210381 | 1.039536016 | 0.012011311 |
| 2.375948162 | 0.527601065 | 0           | 0           | 0.530755523 |
| 0           | 0           | 0           | 0.88097069  | 4.329319039 |
| 5.141299433 | 0           | 0           | 0           | 0           |
| 3.497809194 | 5.812554309 | 8.859073903 | 7.145232446 | 2.053866808 |
| 2.066268741 | 0.014979416 | 0.015503681 | 0.015029244 | 1.645700113 |
| 2.700441578 | 3.443802175 | 7.5320123   | 5.256897135 | 0.025044589 |
| 4.828585433 | 0           | 0           | 0           | 2.494834344 |

|             |             |             |             |             |
|-------------|-------------|-------------|-------------|-------------|
| 0.277792349 | 0.285696662 | 0.302490247 | 0.287257823 | 0.294228889 |
| 2.526393597 | 0           | 0           | 0           | 1.643631431 |
| 2.520398194 | 0           | 1.745086713 | 0           | 8.328574481 |
| 5.067605816 | 0.43358306  | 1.454022409 | 0           | 0           |
| 3.602725052 | 0.029068723 | 3.465260225 | 0.02916863  | 2.946296289 |
| 4.483624568 | 0.105952506 | 3.271904567 | 0.106380683 | 0.108276514 |
| 3.532626088 | 1.115212472 | 3.364068242 | 0.629290849 | 7.266751159 |
| 2.950200232 | 0.843153813 | 1.442661239 | 0           | 0           |
| 1.609414864 | 0.00594117  | 1.019588752 | 0.005960511 | 3.352179689 |
| 2.553181166 | 0.052143678 | 0.05413432  | 0.052332339 | 1.169222164 |
| 0.068592482 | 0.069938191 | 0.072715173 | 0.070201011 | 0.071362824 |
| 3.195815601 | 9.243678422 | 10.95630362 | 7.710715358 | 7.759940617 |
| 2.379837784 | 0.092771552 | 0.096638131 | 0.093136837 | 1.93723948  |
| 1.623482433 | 1.031543531 | 3.507251218 | 0.009420757 | 5.37215068  |
| 4.310984317 | 0.027982266 | 0.028992644 | 0.028078201 | 6.123830036 |
| 2.669993017 | 0.080856807 | 1.891401935 | 0.0811676   | 1.894901377 |
| 2.964271166 | 0           | 2.338654719 | 0           | 1.878271259 |
| 5.08944466  | 2.530346871 | 4.231808889 | 0.046774884 | 5.965725635 |
| 1.126246593 | 0           | 0           | 0           | 1.13026001  |
| 3.980007031 | 0.681189973 | 3.911931719 | 0           | 7.107263028 |
| 1.222532196 | 0.068496609 | 0.071207846 | 0.068753236 | 0.069887598 |
| 4.899869397 | 6.423732538 | 8.149950479 | 5.59101379  | 0           |
| 2.77288486  | 0.040782726 | 3.194253949 | 0.040926644 | 2.17532801  |
| 2.183728227 | 0.042754842 | 2.78107326  | 0.042906381 | 1.754110411 |
| 3.857472906 | 0.163759583 | 0.171599843 | 0.164496025 | 0.167765407 |
| 1.068407526 | 0.020427938 | 0.021152379 | 0.020496762 | 2.089637722 |
| 3.370493622 | 0           | 0           | 0.942163429 | 0           |
| 4.048418844 | 0           | 0.580715568 | 0           | 1.044639794 |
| 1.589829499 | 5.734253875 | 8.992344638 | 5.983632908 | 8.166304171 |
| 0.311200848 | 0.320501362 | 0.340359444 | 0.322341744 | 1.908634832 |
| 1.633709406 | 1.632568279 | 1.619127325 | 1.632094918 | 7.380405343 |
| 6.760647458 | 0           | 0.7578724   | 0           | 4.043931615 |
| 2.398044983 | 1.05515824  | 1.651006817 | 0.016550967 | 1.054747622 |
| 3.103897443 | 0.12275481  | 0.128190866 | 1.384793902 | 0.125537281 |
| 1.180965405 | 1.55476819  | 2.656458169 | 1.182494044 | 8.032224159 |
| 3.095200736 | 1.065162418 | 1.063799709 | 0.019591698 | 1.663809733 |
| 3.088256982 | 0.061339148 | 0.063729293 | 0.061565509 | 1.197958198 |
| 1.50606008  | 0           | 0           | 0           | 5.303418027 |
| 3.217867764 | 0           | 0           | 0           | 0           |
| 2.061821352 | 0           | 0           | 0           | 2.616104826 |
| 2.091728041 | 0           | 2.094058057 | 0.839189927 | 6.635284915 |
| 3.586313682 | 0.369450369 | 0.394012541 | 0.37171671  | 9.536187792 |
| 2.181665294 | 6.935213255 | 9.4828154   | 7.848016092 | 7.201716534 |
| 3.608757126 | 0.09775753  | 0.10187415  | 0.098146283 | 5.27241722  |
| 3.62966989  | 0.954248467 | 0           | 0           | 0.95458906  |
| 2.797303168 | 0           | 0           | 0           | 0           |
| 3.185818373 | 0.08480334  | 1.266054847 | 0.085131934 | 3.855129305 |
| 3.506088179 | 0.072841119 | 4.257136887 | 0.073116511 | 3.509460385 |
| 3.866078077 | 2.808835763 | 5.884576757 | 3.158890317 | 4.356369562 |
| 1.349908402 | 8.882722484 | 13.40075671 | 9.009652706 | 5.376266793 |
| 2.056550192 | 0.815192596 | 0.81881528  | 0           | 2.714893522 |
| 4.143910015 | 0           | 1.94178161  | 0           | 0.473763291 |
| 2.815649284 | 0.119023019 | 2.472501714 | 0.11951627  | 0.121701523 |
| 2.846440713 | 0.231632166 | 0.244117996 | 0.232798307 | 1.682995381 |
| 3.070105934 | 1.358722431 | 0.118707448 | 0.114225621 | 0.116292829 |
| 2.439830332 | 0.109019729 | 0.113717186 | 0.109462934 | 7.858055205 |
| 3.070974154 | 0           | 0.490836792 | 0.482799618 | 0.48564221  |
| 5.802952697 | 1.412407593 | 4.046346863 | 1.412028616 | 7.831458043 |

| hsa-miR-520a-5p | hsa-miR-541-3p | hsa-miR-5003-3p | hsa-miR-518b | hsa-miR-518f-5p |
|-----------------|----------------|-----------------|--------------|-----------------|
| 0.137780495     | 2.078342304    | 0.09051646      | 0.138654347  | 0.137593607     |
| 0.007788588     | 2.62137959     | 1.613730512     | 0.007826184  | 0.007780533     |
| 0               | 4.011601141    | 2.658891269     | 0            | 0               |
| 4.094528143     | 0              | 0.86506812      | 4.577176221  | 1.413617735     |
| 0.017911156     | 0.01697017     | 2.069235205     | 0.017999715  | 0.017892182     |
| 0.037833639     | 2.159484429    | 1.115264253     | 0.038029457  | 0.037791698     |
| 1.766771475     | 0.251805349    | 1.67995639      | 3.589894041  | 0.273676932     |
| 0               | 1.909905108    | 1.419256591     | 0            | 0               |
| 0               | 0              | 0               | 0            | 0               |
| 1.253202165     | 4.253783232    | 1.965316158     | 1.935373027  | 0               |
| 0.137551918     | 0.128439596    | 0.090378983     | 0.138423952  | 0.137365418     |
| 0.115794166     | 3.063489916    | 0.07711533      | 0.116498749  | 0.115643428     |
| 0               | 1.52411982     | 0               | 0.951206594  | 0               |
| 0.079879505     | 1.885230791    | 2.283419037     | 2.658416016  | 3.160087655     |
| 0               | 0.968085275    | 0.969595812     | 0            | 0               |
| 5.989432041     | 1.288132898    | 2.651288632     | 5.521394993  | 4.675042186     |
| 4.351318407     | 1.214240614    | 1.233020892     | 6.196577022  | 2.69882695      |
| 0               | 0              | 1.738601423     | 0.79596141   | 0               |
| 0.156059082     | 5.829188358    | 2.067762646     | 0.157082347  | 0.1558403       |
| 0               | 0.96307245     | 0.964804942     | 0            | 0               |
| 0.508174956     | 0.453955637    | 0.273110363     | 0.513658459  | 0.507009315     |
| 0.136605965     | 1.415836664    | 0.089809636     | 1.408928241  | 0.136421068     |
| 0.887420484     | 5.516986175    | 1.453769373     | 0            | 0               |
| 0.241161401     | 0.222389613    | 0.149035236     | 0.242984958  | 0.240772028     |
| 0               | 5.170371706    | 0.867564485     | 0            | 0               |
| 1.210994927     | 1.203109683    | 2.140628935     | 1.212802816  | 0.455619491     |
| 1.037616317     | 0.010974349    | 1.036188474     | 1.037483586  | 1.630969925     |
| 0.222501509     | 0.205642751    | 2.668633306     | 0.224134765  | 0.222152666     |
| 0.059172225     | 0.055781285    | 0.040857816     | 1.185640585  | 0.059103504     |
| 0.79120555      | 0              | 1.336846339     | 0            | 0               |
| 1.427760423     | 0.133316031    | 2.03327704      | 0.143780853  | 0.142670628     |
| 9.010729079     | 0.034736908    | 2.953035305     | 10.09941056  | 8.269352912     |
| 11.56169377     | 0.064330569    | 0.046892616     | 12.68102976  | 11.57934784     |
| 3.36110089      | 0.67424128     | 0.682374799     | 4.139775408  | 1.551989881     |
| 0.753329272     | 0              | 1.681476106     | 0            | 0               |
| 1.257163427     | 4.313480083    | 0               | 3.371601418  | 1.256992534     |
| 0.11523058      | 0.107888548    | 0.076767024     | 0.115930975  | 0.115080737     |
| 0.018848102     | 1.659930151    | 1.058506929     | 2.080764786  | 0.018828092     |
| 0.051889473     | 0.048959397    | 0.036000457     | 0.052166521  | 0.051830146     |
| 0.027934849     | 2.119025662    | 0.019691374     | 0.02807622   | 0.027904565     |
| 0               | 0.850627643    | 0.856286403     | 0            | 0               |
| 1.025315563     | 1.616201693    | 2.353333151     | 0.007806112  | 0.00776058      |
| 7.130619789     | 0.136841834    | 0.095859081     | 8.459386821  | 7.224366994     |
| 0.211622284     | 0.195843975    | 0.133024251     | 0.213148446  | 0.211296259     |
| 6.950165811     | 0.163153786    | 2.116982604     | 7.584477851  | 7.502110487     |
| 0               | 1.480100889    | 2.214363138     | 0            | 0               |
| 0.310415251     | 1.859060057    | 1.748972525     | 0.313018671  | 0.309859978     |
| 0.123958745     | 2.033843387    | 1.982140437     | 0.124724857  | 0.123794865     |
| 9.930782569     | 0              | 0.855659352     | 9.959492202  | 9.772305657     |
| 0.243221345     | 0.224233748    | 0.150132007     | 0.245066424  | 0.242827389     |
| 1.335113669     | 1.339765531    | 0.073397999     | 1.333861416  | 0.109658192     |
| 0               | 1.954468283    | 1.284666405     | 0            | 0               |
| 0               | 2.263430914    | 0               | 0            | 0               |
| 0.181842951     | 0.168889888    | 2.132519318     | 1.530873536  | 0.181576334     |
| 1.108165881     | 1.109868015    | 2.127642751     | 1.716090774  | 1.108239471     |
| 0               | 0              | 0.788100905     | 0            | 0               |

|             |             |             |             |             |
|-------------|-------------|-------------|-------------|-------------|
| 0.120770581 | 0.112999577 | 2.406972071 | 0.121512479 | 0.120611872 |
| 0           | 1.121899449 | 2.069978907 | 0           | 0           |
| 0.007308839 | 1.024210522 | 3.030598128 | 0.007344077 | 0.007301288 |
| 1.061884116 | 1.062874208 | 2.397939827 | 2.081989834 | 1.061925861 |
| 0           | 0.531388599 | 1.007748443 | 0           | 0           |
| 12.0274267  | 5.435880289 | 0.065008125 | 11.74988842 | 11.94913263 |
| 5.323699057 | 0.006909893 | 1.022871964 | 5.208228012 | 3.737347459 |
| 1.124510877 | 6.594627253 | 0.638832798 | 0.637736669 | 0           |
| 0           | 0.748411975 | 0           | 0.753327523 | 0           |
| 0.000408808 | 0.000388164 | 0.000293596 | 0.000410746 | 0.000408393 |
| 0.178464407 | 1.530049177 | 1.478331316 | 0.179681619 | 0.178204248 |
| 0           | 2.187796145 | 1.47569553  | 0.906204098 | 0.905824154 |
| 0.234205551 | 1.674344704 | 0.145312971 | 0.235957191 | 0.233831492 |
| 0           | 0           | 1.829645557 | 0           | 0           |
| 6.44548276  | 0.933306498 | 1.509225882 | 7.029981207 | 4.846614128 |
| 0.04392962  | 1.755555919 | 1.133044655 | 0.044160101 | 0.043880259 |
| 0.047629123 | 1.769286734 | 2.176479496 | 0.047881063 | 0.047575169 |
| 0.266990199 | 2.454674039 | 1.665904028 | 0.269091013 | 0.26654181  |
| 0           | 0           | 0.82479686  | 0           | 1.362418787 |
| 0           | 0           | 0.820554618 | 2.312014035 | 0           |
| 5.046124203 | 3.17405919  | 4.238908368 | 5.997756084 | 3.766821432 |
| 0.19819555  | 0.183715107 | 1.522478529 | 0.199593447 | 0.197896864 |
| 0           | 1.16244425  | 1.182268691 | 0           | 0           |
| 0.056544626 | 1.181069539 | 1.169179702 | 0.056849592 | 0.056479325 |
| 0.176000222 | 0.163578642 | 0.11297997  | 0.177195519 | 0.175744737 |
| 0           | 1.975550836 | 0           | 0           | 0           |
| 0           | 1.276232092 | 1.685542059 | 0           | 0.756135435 |
| 1.070461498 | 3.565128356 | 0.015453201 | 0.02194172  | 0.021809438 |
| 0           | 1.962119959 | 1.290435928 | 0           | 0           |
| 0.805705768 | 4.998331824 | 0           | 0           | 0           |
| 0.126571973 | 0.118344388 | 0.083729801 | 0.127358109 | 0.126403816 |
| 0           | 0           | 0           | 0           | 0.6598738   |
| 0.350430872 | 0.31895756  | 1.821043332 | 0.353538262 | 0.349768544 |
| 0.000444854 | 0.000422387 | 1.586622    | 0.000446963 | 0.000444402 |
| 0.274533412 | 0.252152814 | 0.166498245 | 0.276718242 | 0.274067147 |
| 1.598207637 | 0.191527417 | 2.192206952 | 3.383082252 | 1.598622978 |
| 0           | 2.144666872 | 0           | 0.876684903 | 0           |
| 8.11186049  | 2.06450357  | 2.057934534 | 7.111992832 | 7.632946271 |
| 0.709043848 | 7.067364425 | 0.712205826 | 1.219893289 | 0.70886845  |
| 0           | 4.57766078  | 1.43853147  | 0.586058512 | 0.584617773 |
| 0           | 2.117839195 | 1.82163161  | 0           | 0           |
| 7.18375554  | 1.291812023 | 0.063042076 | 7.455212904 | 6.221831937 |
| 0           | 0           | 2.28487104  | 0.970678229 | 0           |
| 1.070340812 | 4.355724208 | 1.067456276 | 1.670485121 | 1.07038834  |
| 0           | 4.689441996 | 1.193162519 | 0           | 0           |
| 0           | 2.899493215 | 1.38083041  | 0           | 0           |
| 0           | 4.737665098 | 0           | 0.989100648 | 0.989055321 |
| 4.317353459 | 0           | 1.279408829 | 4.688266834 | 1.949201697 |
| 1.297828844 | 0           | 1.612725522 | 1.29945652  | 0.956772943 |
| 1.128867071 | 2.709796529 | 1.426129201 | 0.406390157 | 0.404586837 |
| 0.012060939 | 1.039817563 | 3.957710093 | 0.012119754 | 0.012048337 |
| 0           | 0           | 0           | 0           | 0           |
| 0           | 5.299467795 | 0           | 0           | 0           |
| 0           | 10.18125351 | 1.456506236 | 0.89008931  | 0           |
| 7.816192856 | 2.053320299 | 2.312224865 | 7.111186629 | 6.682461953 |
| 0.015312473 | 0.014512636 | 1.04769955  | 0.015387722 | 0.015296351 |
| 4.032308879 | 3.442460603 | 0.017762351 | 6.774240641 | 3.932319078 |
| 0           | 1.719062421 | 0.800301234 | 0           | 0           |

|             |             |             |             |             |
|-------------|-------------|-------------|-------------|-------------|
| 0.296269751 | 2.998450634 | 0.177533886 | 0.298704406 | 0.295750353 |
| 0           | 2.210689429 | 2.171859304 | 0           | 0           |
| 0           | 0.809440714 | 2.332686597 | 0.813183633 | 0           |
| 0.438244309 | 0.848235111 | 1.926194372 | 2.330859236 | 0.437957765 |
| 0.029736946 | 0.028133885 | 0.020936408 | 2.125983698 | 0.029704576 |
| 0.108826596 | 0.101971851 | 1.939670776 | 1.981429956 | 1.332568006 |
| 2.563691871 | 0           | 1.509238875 | 2.840711665 | 2.01433376  |
| 0           | 1.850550053 | 0.429066634 | 1.174210046 | 0.431451614 |
| 0.0060704   | 1.609414278 | 1.019085705 | 0.006099581 | 0.006064148 |
| 0.053406852 | 0.050381755 | 1.160273543 | 0.053692944 | 0.053345589 |
| 0.071699356 | 8.357470609 | 0.049106341 | 0.072098712 | 0.071613862 |
| 9.915890982 | 0.039896241 | 1.128120261 | 10.10476111 | 7.132182786 |
| 0.095221955 | 4.332344269 | 1.27472765  | 0.095778461 | 0.095102861 |
| 1.031230488 | 0.009101054 | 0.006848448 | 2.365498049 | 0.009585942 |
| 0.028623887 | 0.02708452  | 2.108939205 | 0.028768975 | 0.028592808 |
| 0.082940497 | 0.077961272 | 0.056395807 | 0.083413336 | 0.082839289 |
| 0           | 1.877013077 | 2.381280134 | 0           | 1.206405627 |
| 2.799035742 | 0.045051597 | 3.996642992 | 3.686642318 | 1.151490861 |
| 0           | 2.028906158 | 0           | 0           | 0           |
| 1.186616482 | 0           | 2.141480387 | 2.10120831  | 0.683974889 |
| 0.070216157 | 1.22283123  | 1.207368311 | 0.070606038 | 0.07013269  |
| 6.331382672 | 0.610452744 | 1.112934309 | 7.547333953 | 4.355608    |
| 2.175095217 | 1.135015737 | 0.02915731  | 1.745827356 | 1.746365468 |
| 0.04376903  | 0.041338496 | 2.163048853 | 0.043998587 | 0.043719866 |
| 0.168716686 | 5.609290798 | 0.108777722 | 0.169848054 | 0.168474838 |
| 0.020888087 | 2.681025481 | 1.064708054 | 0.020992087 | 0.020865806 |
| 0           | 2.240740557 | 1.518895169 | 0           | 0           |
| 0           | 1.038893121 | 1.968340618 | 0           | 0           |
| 7.643072624 | 2.005279759 | 1.003799156 | 7.381503805 | 5.787764606 |
| 0.332988082 | 0.303712433 | 2.455247551 | 0.335870951 | 0.332373433 |
| 0.218059918 | 0.20164538  | 1.565507544 | 0.219649109 | 0.217720463 |
| 0           | 0.751418271 | 2.824341348 | 0           | 0.755346897 |
| 0.01686401  | 1.652168879 | 2.653284451 | 1.054417017 | 0.016846189 |
| 0.126196502 | 0.117998695 | 0.083500841 | 2.038567093 | 0.126028961 |
| 1.185209571 | 0.677833455 | 0.685956128 | 0           | 2.308247172 |
| 0.019964942 | 1.664285834 | 0.014148947 | 1.064286128 | 0.019943691 |
| 0.062855392 | 1.200438345 | 0.043296898 | 0.063199012 | 0.062781821 |
| 0.650807245 | 0           | 1.838210177 | 0           | 0           |
| 0           | 0.845183228 | 0           | 0           | 0           |
| 0.661741885 | 2.062444791 | 1.854982888 | 1.15855429  | 0.661542578 |
| 0           | 1.781076371 | 1.397407992 | 0.841103401 | 0           |
| 0.384867042 | 0.348867583 | 0.219978508 | 0.388439785 | 0.384105963 |
| 8.453230981 | 1.462391576 | 1.878063061 | 8.273157181 | 6.210607398 |
| 0.100365975 | 0.094140864 | 2.346870913 | 0.100958575 | 0.100239166 |
| 0           | 2.519108987 | 1.532884484 | 0           | 0           |
| 0           | 2.667287749 | 1.474051136 | 0           | 0           |
| 0.087006788 | 0.081742977 | 0.059007003 | 1.907532507 | 0.086899741 |
| 1.865477617 | 0.070273664 | 2.595453999 | 2.3027402   | 1.865617892 |
| 3.160447082 | 0.208264235 | 0.140568021 | 4.358456153 | 3.44246366  |
| 9.928808899 | 5.750876527 | 1.952739469 | 11.15995015 | 10.56964969 |
| 0           | 1.747777307 | 1.368614035 | 0           | 0           |
| 0.474803747 | 1.233502983 | 1.550618349 | 0           | 0.907484519 |
| 0.122335978 | 0.114442517 | 0.081140591 | 0.123089735 | 0.122174736 |
| 0.239508177 | 0.220908925 | 1.610458857 | 0.241314536 | 0.239122466 |
| 0.116892861 | 3.296982444 | 1.962485988 | 0.117605633 | 0.116740374 |
| 0.11199513  | 0.104900439 | 0.074762739 | 0.112671619 | 0.111850395 |
| 1.259678097 | 4.7405674   | 0.485477087 | 0           | 0.486396125 |
| 2.522826278 | 0.126914233 | 2.449670426 | 2.069843755 | 0.135707308 |



| hsa-miR-520g-3p | hsa-miR-520e-3p | hsa-miR-548d-3p | hsa-miR-516b-5p | hsa-miR-5010-3p |
|-----------------|-----------------|-----------------|-----------------|-----------------|
| 0.137061947     | 0.131281698     | 0.089096881     | 0.13800526      | 3.117262023     |
| 0.007757586     | 0.007505246     | 0.005492437     | 0.00779827      | 2.84320517      |
| 0               | 0               | 0.38118729      | 0               | 1.572329992     |
| 2.597823473     | 3.105141413     | 1.827692338     | 3.943532459     | 3.113347096     |
| 0.017838142     | 0.017244384     | 0.012541526     | 0.017933959     | 1.655161721     |
| 0.037672265     | 0.03636226      | 0.026128941     | 0.037884051     | 2.483105563     |
| 1.768618102     | 0.258162503     | 1.675120528     | 2.477836689     | 1.752447095     |
| 0               | 0               | 0.57404277      | 0               | 2.469789176     |
| 0               | 0               | 1.702964798     | 0               | 2.458050015     |
| 0.735051802     | 0.732002634     | 1.967192001     | 1.253420054     | 2.406002265     |
| 0.136834862     | 0.131066488     | 0.088961926     | 0.137776215     | 3.344833058     |
| 0.115214514     | 0.110542118     | 0.075936452     | 0.115975429     | 2.436672607     |
| 0               | 0               | 0.952699201     | 0               | 2.254353919     |
| 0.07950691      | 0.076493663     | 2.281442722     | 1.248044968     | 2.914723898     |
| 0               | 0               | 2.959259715     | 0               | 3.275828649     |
| 4.595856436     | 2.368495957     | 1.265029658     | 3.736053662     | 1.285092995     |
| 5.131690339     | 3.896180185     | 0               | 4.811039461     | 2.361967775     |
| 0               | 0               | 3.173925233     | 0.795457007     | 2.690075623     |
| 0.155218027     | 0.14846378      | 2.83260521      | 0.156322232     | 2.565250894     |
| 0               | 0.96316088      | 0.964943798     | 0               | 2.271916294     |
| 0.503706837     | 0.469037654     | 0.267450638     | 0.509580131     | 4.24959604      |
| 0.13589507      | 0.130175765     | 0.08840301      | 0.136828331     | 2.061138616     |
| 0               | 0               | 2.658510667     | 0               | 0               |
| 0.239665542     | 0.227748909     | 0.146446314     | 0.241629979     | 3.150039835     |
| 0               | 0               | 0.868030958     | 0               | 2.608380974     |
| 0.880685481     | 0               | 1.520653545     | 1.211425243     | 2.085714091     |
| 0.011527386     | 1.038139071     | 1.036034272     | 0.011588388     | 3.513929972     |
| 0.22116116      | 0.210464384     | 1.571111291     | 0.222921263     | 2.757813887     |
| 0.058907853     | 0.056765825     | 2.214357033     | 0.059254835     | 2.567452209     |
| 0               | 0               | 0.795400107     | 0               | 1.715118371     |
| 0.142114231     | 0.136067801     | 3.065420776     | 0.143101464     | 2.080162655     |
| 8.326362693     | 6.826214303     | 1.111559155     | 9.489024655     | 2.15123933      |
| 11.21565928     | 9.004040809     | 1.201112025     | 12.14455776     | 2.87100101      |
| 3.902792278     | 0.675185394     | 1.196835549     | 3.767365672     | 3.18130855      |
| 0               | 0.749920162     | 0               | 0               | 2.434627222     |
| 0               | 0               | 0.742891366     | 1.638282998     | 1.25538399      |
| 0.114654367     | 0.110009452     | 0.075594263     | 0.115410767     | 0.097265094     |
| 2.406841049     | 0.018144973     | 1.058251811     | 1.060901192     | 3.086279371     |
| 0.051661226     | 0.049810684     | 1.155199309     | 0.051960789     | 2.806743087     |
| 0.027818319     | 0.026871522     | 1.085551609     | 1.089706956     | 1.69327551      |
| 0               | 0               | 1.413346365     | 0               | 1.801812448     |
| 1.025377411     | 0.007486012     | 1.024280697     | 0.007778271     | 0.006772727     |
| 6.938021883     | 5.991863594     | 1.401753884     | 7.240620081     | 2.536278376     |
| 0.210369502     | 0.200361227     | 0.130774016     | 0.212014555     | 3.068645366     |
| 5.753145612     | 6.491764585     | 3.377959039     | 6.431808391     | 1.512959755     |
| 0               | 0               | 0               | 0               | 2.876651237     |
| 0.308283239     | 0.291411719     | 0.18118856      | 0.311083764     | 0.247778793     |
| 0.123328592     | 0.118252938     | 1.979437576     | 0.124155823     | 2.022064937     |
| 8.093309672     | 8.193035079     | 2.130832934     | 8.869703043     | 2.590056564     |
| 0.241707906     | 0.229653598     | 3.312964096     | 0.243695443     | 1.680426676     |
| 1.986453953     | 0.10487366      | 0.072284054     | 2.431812197     | 2.416652286     |
| 0               | 0               | 0.753642953     | 0               | 1.655435654     |
| 0               | 0               | 0.556915605     | 0               | 2.277331433     |
| 0.180818208     | 0.172608658     | 1.482944333     | 0.182163687     | 2.194174533     |
| 1.716703674     | 0.03248388      | 2.126822439     | 1.108073332     | 1.109237076     |
| 0               | 0               | 0.788775759     | 0               | 2.013820715     |

|             |             |             |             |             |
|-------------|-------------|-------------|-------------|-------------|
| 0.120160299 | 0.115243258 | 1.338512143 | 0.120961435 | 2.01207642  |
| 0           | 0           | 0           | 0           | 2.244171067 |
| 0.007279779 | 0.007043243 | 2.351302625 | 0.007317913 | 2.354327697 |
| 1.660606688 | 1.062741261 | 0.013390421 | 2.082131963 | 3.258156698 |
| 0.537812248 | 0           | 0           | 0           | 2.803640194 |
| 10.89094176 | 10.36365388 | 2.662262266 | 11.1670283  | 2.37112612  |
| 4.497180353 | 2.031807589 | 3.615584251 | 4.359601969 | 4.122447478 |
| 0.635869169 | 0           | 1.140897226 | 0           | 1.120441902 |
| 0.751981061 | 0           | 1.289793395 | 0.75272956  | 2.218087279 |
| 0.000407209 | 0.000394189 | 1.001287373 | 0.000409307 | 3.586927857 |
| 0.177464459 | 0.169451009 | 2.120267826 | 0.178777368 | 1.520511776 |
| 0.905661619 | 0           | 1.47622528  | 1.872664043 | 1.87425277  |
| 0.232768448 | 0.221312285 | 1.59542882  | 0.234655679 | 1.658921454 |
| 0.863852051 | 0           | 1.830560593 | 0           | 2.131014379 |
| 6.430285578 | 5.319929757 | 1.509602912 | 6.414401604 | 0.933415523 |
| 0.043739704 | 0.042198838 | 2.162538246 | 0.043988953 | 4.785430671 |
| 0.047421541 | 0.045737905 | 0.032674693 | 0.047693978 | 2.193535518 |
| 0.265267972 | 0.25158192  | 0.159720293 | 0.267529884 | 2.875258729 |
| 0           | 0           | 0.825381963 | 0.821491746 | 3.721235673 |
| 0.81666516  | 0           | 1.369704631 | 0.817232162 | 2.062204924 |
| 4.090847383 | 3.63847591  | 1.113793589 | 3.640284762 | 2.154245569 |
| 0.197047696 | 0.187866021 | 0.123469034 | 0.1985549   | 0.163300506 |
| 0           | 0           | 1.565295737 | 0.669701467 | 2.2962701   |
| 0.056293404 | 0.054257441 | 1.779907556 | 0.056623125 | 3.709012037 |
| 0.175018221 | 0.167146771 | 0.111133993 | 1.516939989 | 1.514164895 |
| 0           | 0           | 0.982495704 | 0           | 1.562741578 |
| 0           | 0           | 1.294488853 | 0.756472743 | 1.665284062 |
| 0.021742965 | 0.021012856 | 1.663674011 | 0.021860828 | 1.071242433 |
| 0           | 0           | 1.578942815 | 0           | 2.31058135  |
| 0           | 0           | 1.753834672 | 0           | 2.873791502 |
| 0.125925387 | 0.12071863  | 1.35291017  | 0.126774197 | 1.382412136 |
| 0           | 0           | 0           | 0           | 2.910433124 |
| 1.94885117  | 1.953341153 | 1.814726354 | 0.351228473 | 2.615946614 |
| 0.000443114 | 0.000428944 | 3.586855751 | 0.000445397 | 2.809424556 |
| 1.769570974 | 0.258522162 | 0.163524262 | 1.767052623 | 2.438653079 |
| 3.102664765 | 0.195912972 | 0.128184805 | 2.288224969 | 3.055068166 |
| 0           | 0           | 0.879640835 | 0           | 2.984961795 |
| 6.721948451 | 5.599775312 | 1.0463009   | 5.885364633 | 3.529340948 |
| 0.708398892 | 0           | 1.928227236 | 0           | 2.362404137 |
| 0           | 0           | 0.587021806 | 0           | 1.941763404 |
| 0           | 0.856022166 | 0           | 0           | 2.598543392 |
| 6.370730766 | 4.817779519 | 0.06210478  | 7.250083728 | 1.288702482 |
| 0           | 0           | 0.971627567 | 0           | 0.970166651 |
| 0.021705172 | 0.020976393 | 0.015219685 | 0.021822819 | 2.091326471 |
| 0           | 0           | 2.703964229 | 0           | 2.310412641 |
| 0           | 0           | 0           | 0           | 1.765468178 |
| 0.989036059 | 0           | 2.308311404 | 0           | 1.571600667 |
| 3.042794906 | 2.198010257 | 1.280659833 | 1.949505175 | 1.954400331 |
| 0           | 0.504804195 | 1.615644254 | 0           | 0.949307521 |
| 0.810100733 | 0           | 1.662380719 | 0           | 1.808656716 |
| 0.012012442 | 0.011617856 | 0.008479776 | 0.012076084 | 2.639316975 |
| 0.530776298 | 0           | 1.359428638 | 0.532038566 | 3.192113343 |
| 0           | 0           | 0           | 0           | 2.15671061  |
| 0.889456968 | 0           | 1.457119479 | 0           | 1.448529729 |
| 6.108534246 | 6.171780738 | 1.166601487 | 6.173533031 | 1.518721803 |
| 0.01525043  | 0.014745771 | 1.640648598 | 0.015331849 | 4.160092903 |
| 4.650898596 | 5.170561556 | 0.017522683 | 5.652888472 | 2.430827742 |
| 0           | 0           | 1.344782774 | 0           | 2.286938953 |

|             |             |             |             |             |
|-------------|-------------|-------------|-------------|-------------|
| 0.294275256 | 0.278470296 | 0.174308285 | 0.296895016 | 0.237420947 |
| 0           | 0           | 0           | 0           | 2.345368858 |
| 0           | 0           | 0.816663784 | 0           | 2.884803783 |
| 0.856365104 | 0           | 1.725688859 | 0.85809318  | 2.595893546 |
| 1.095695831 | 0.028600547 | 0.020651868 | 1.095378327 | 2.940068071 |
| 1.33317394  | 0.103953153 | 1.308388405 | 1.982275217 | 3.769407157 |
| 2.013882    | 2.012438032 | 2.061999332 | 2.01474564  | 1.777220971 |
| 0.430674268 | 0.424804884 | 0.859966575 | 0.432098251 | 1.664411966 |
| 0.006046336 | 0.005850438 | 1.019005829 | 0.006077915 | 2.348882697 |
| 0.053171161 | 0.051260529 | 1.159501606 | 0.053480494 | 3.557765779 |
| 0.071370488 | 0.068708894 | 1.827567004 | 0.071802137 | 3.305535947 |
| 9.809262071 | 7.859011251 | 2.482790413 | 9.638095326 | 2.172697741 |
| 0.094763914 | 0.091064814 | 1.898195008 | 0.095365151 | 3.858947354 |
| 1.031306873 | 1.031664836 | 1.029936154 | 2.041599607 | 1.62291434  |
| 0.028504296 | 0.027532685 | 0.019894154 | 0.028661242 | 2.711079983 |
| 0.082551213 | 0.079403867 | 1.240781534 | 0.083062178 | 2.323883523 |
| 0           | 0           | 2.572100387 | 0.6997821   | 2.532700039 |
| 2.530207652 | 0.045828166 | 0.032737342 | 1.768288135 | 0.041103164 |
| 0           | 0           | 0           | 0           | 2.433060358 |
| 0.683470772 | 0           | 2.359529311 | 1.559190948 | 3.571061947 |
| 0.06989508  | 0.067296201 | 2.250591336 | 0.0703165   | 2.278072103 |
| 6.927531117 | 4.774691746 | 0           | 6.788536374 | 1.996285928 |
| 0.04156621  | 0.040108676 | 1.126108176 | 1.746177369 | 2.170799212 |
| 1.139548739 | 0.042045161 | 2.488258478 | 1.139082698 | 1.14043996  |
| 0.167787049 | 0.160330251 | 0.10701367  | 0.169007602 | 1.495286231 |
| 0.020802348 | 0.020105293 | 1.064424106 | 0.020914865 | 0.018137513 |
| 0           | 0           | 0.944571851 | 0.942717925 | 1.514514474 |
| 0           | 0           | 1.724521035 | 0           | 1.686882498 |
| 6.31019454  | 4.913129748 | 0.000851899 | 6.346282434 | 2.590464837 |
| 0.330628528 | 0.311997405 | 0.19195088  | 0.333728184 | 2.576785852 |
| 2.322332901 | 0.206341933 | 0.134235697 | 0.218468364 | 3.086738712 |
| 0           | 0           | 2.826550891 | 0           | 1.969970607 |
| 1.05474472  | 0.016237697 | 0.011816937 | 0.016885427 | 3.077417685 |
| 0.125552285 | 0.120364425 | 0.082208559 | 0.126397984 | 4.095988583 |
| 1.184456464 | 0           | 1.201403614 | 0.683316657 | 2.319203463 |
| 1.064674119 | 0.019218285 | 1.657118704 | 0.019990482 | 3.793835897 |
| 0.062572367 | 0.060279963 | 0.042678921 | 0.062943835 | 2.250987959 |
| 0           | 0           | 1.840552958 | 0           | 2.053524784 |
| 0           | 0           | 0           | 0           | 1.794388978 |
| 0           | 0           | 1.173739347 | 0           | 1.824362806 |
| 0           | 0.838349312 | 0           | 0.840702984 | 2.353631076 |
| 0.381946617 | 0.359004174 | 0.215727064 | 0.385783767 | 2.690731818 |
| 7.175241377 | 6.988500159 | 0           | 6.933014434 | 2.185043412 |
| 0.099878282 | 0.095941567 | 1.286648081 | 0.100518451 | 1.308897463 |
| 0.954591427 | 0           | 0           | 0           | 2.259455439 |
| 0           | 0           | 0           | 0           | 1.738680671 |
| 0.086595057 | 0.083267461 | 0.058136837 | 0.087135492 | 2.671292196 |
| 1.865973783 | 2.638156396 | 1.836756915 | 1.865297222 | 3.121624803 |
| 3.160616623 | 1.652501389 | 1.577211257 | 3.678103994 | 1.637730143 |
| 10.9564059  | 8.481372099 | 1.320074479 | 11.45619863 | 1.345877454 |
| 0.81655764  | 0           | 2.750157113 | 0           | 1.356425547 |
| 0.473785729 | 0.468224665 | 1.793068519 | 0.475146478 | 1.946235055 |
| 0.121715964 | 2.029432138 | 0.0798905   | 0.12252988  | 2.458249525 |
| 0.238026368 | 0.226219794 | 0.145583278 | 0.239972343 | 3.650383604 |
| 1.35616797  | 0.111580387 | 1.328803849 | 0.117076229 | 1.355569929 |
| 0.111438543 | 0.1069505   | 1.316443709 | 0.112169172 | 0.094624468 |
| 0           | 0           | 0           | 0           | 3.339789612 |
| 2.071961753 | 0.129502443 | 2.01167602  | 1.408130869 | 0.114009219 |

| hsa-miR-7974 | hsa-miR-5586-5p | hsa-miR-516a-5p | hsa-miR-362-5p | hsa-miR-4791 |
|--------------|-----------------|-----------------|----------------|--------------|
| 0.087245448  | 4.17456741      | 0.138851904     | 5.662653576    | 2.001788627  |
| 1.024203753  | 3.623916528     | 0.007834667     | 6.924150464    | 1.02381014   |
| 1.39543401   | 4.280998663     | 0               | 5.27096078     | 1.843592653  |
| 0            | 5.471181634     | 4.524931405     | 5.494499321    | 2.148927458  |
| 0.012319167  | 2.07732298      | 0.018019701     | 6.159791742    | 0.01172256   |
| 1.717498298  | 4.184036453     | 0.03807366      | 5.583819929    | 2.461967435  |
| 0.159475782  | 0.260330219     | 3.827226364     | 7.116330215    | 0.149372739  |
| 0            | 2.727064099     | 1.913820155     | 5.983689923    | 0.579419673  |
| 0            | 2.448273554     | 0               | 6.994061991    | 1.315063561  |
| 0.740860021  | 3.465883626     | 0               | 5.291685781    | 1.275196398  |
| 0.087113763  | 2.078904463     | 1.411128865     | 7.824664101    | 0.082212684  |
| 0.074397455  | 5.273048379     | 0.116657985     | 8.390918414    | 0.070308178  |
| 0            | 2.925984561     | 0               | 7.118063977    | 0.953661816  |
| 0.052586578  | 3.528275074     | 1.24710782      | 6.112732574    | 0.049814789  |
| 1.54939736   | 3.95050852      | 0               | 6.439885296    | 0            |
| 1.886366811  | 1.287521892     | 4.003959908     | 5.92827586     | 0.056899979  |
| 1.236264541  | 3.82581006      | 7.187847064     | 7.398400839    | 1.241571854  |
| 2.054244597  | 6.027438906     | 0               | 7.438115532    | 0            |
| 2.49533009   | 4.112415832     | 0.157313748     | 7.625960599    | 0.092053583  |
| 2.539006666  | 4.029996137     | 0.963826593     | 5.894202106    | 1.544567758  |
| 2.049374653  | 2.292839189     | 0.514905796     | 7.681240147    | 0.241319832  |
| 0.086568377  | 5.054900244     | 1.408522445     | 4.928325435    | 1.366396869  |
| 0.891136316  | 0.885978165     | 0               | 7.92784709     | 1.45759393   |
| 1.604117173  | 2.388626675     | 0.243397891     | 6.193377932    | 0.134243132  |
| 0            | 2.126977979     | 0               | 6.091814468    | 1.835585676  |
| 0.4563571    | 3.880351466     | 1.902744157     | 6.858395353    | 0            |
| 0.007997252  | 2.050313692     | 0.011642967     | 7.600606229    | 0.007613696  |
| 4.140525036  | 3.659578756     | 0.224504495     | 7.214151286    | 2.968457377  |
| 1.786645555  | 3.978207208     | 0.059565644     | 6.848369859    | 2.207141553  |
| 0            | 2.839206829     | 0               | 7.572691608    | 0.798887716  |
| 1.389470143  | 5.831812883     | 0.143987645     | 7.273981816    | 2.447828159  |
| 1.110865477  | 3.496807117     | 9.385389168     | 6.141412005    | 0.023692924  |
| 0.045335861  | 2.613427121     | 12.75691879     | 5.977362347    | 0.042980691  |
| 0            | 3.363611426     | 6.319158942     | 6.51072609     | 0            |
| 0            | 3.058086685     | 0               | 8.747031825    | 0            |
| 1.274134704  | 2.750783368     | 2.189362138     | 6.445650205    | 2.237040677  |
| 0.074063215  | 2.006126211     | 0.116089262     | 6.41634491     | 0.069994846  |
| 0.012954778  | 4.618647607     | 1.659069223     | 7.713755446    | 1.056935483  |
| 0.034832241  | 3.410481716     | 0.052229074     | 6.719351113    | 1.151372071  |
| 2.917731017  | 4.137697675     | 1.089379882     | 6.252692493    | 0.018137     |
| 0.857463825  | 4.401974149     | 0               | 6.737622637    | 0.859410179  |
| 0.005382882  | 2.033914559     | 0.007814573     | 6.56490367     | 1.023749595  |
| 0.092361114  | 2.559452436     | 6.905046613     | 7.467036157    | 0.087115842  |
| 0.127848142  | 3.392155184     | 0.213493872     | 9.194162008    | 0.120137493  |
| 4.816423987  | 4.039245547     | 7.2721538       | 6.809006644    | 0.102138775  |
| 0.918899116  | 3.673934074     | 0               | 6.009006636    | 3.476570605  |
| 1.736121712  | 3.680797435     | 1.849586057     | 5.578466316    | 0.165309254  |
| 0.079211777  | 3.327331553     | 0.124898019     | 5.694233576    | 2.397825129  |
| 1.413655805  | 3.349336911     | 9.517265317     | 7.834624596    | 0            |
| 1.608251812  | 3.488871276     | 0.245484244     | 6.877911708    | 0.135206808  |
| 2.698766935  | 1.988043764     | 3.277083972     | 7.142799901    | 1.302182116  |
| 0            | 2.418070996     | 0               | 4.957078607    | 2.6605701    |
| 0.558298139  | 4.856749699     | 0               | 6.293792705    | 0            |
| 0.111924158  | 4.201410538     | 0.183372664     | 7.929540731    | 0.105349102  |
| 1.703950448  | 1.717455521     | 4.255106604     | 5.493723739    | 1.701387653  |
| 0            | 3.889566943     | 0               | 9.084744456    | 2.045123677  |

|             |             |             |             |             |
|-------------|-------------|-------------|-------------|-------------|
| 2.998320984 | 2.024417277 | 0.121680161 | 6.805021942 | 1.95765648  |
| 0.643339595 | 4.316841247 | 0.640270768 | 5.411815141 | 2.488878057 |
| 0.00506601  | 2.355322912 | 0.007352029 | 6.24830809  | 2.027650586 |
| 0.013152547 | 3.679208459 | 4.096540243 | 7.17723302  | 1.652262581 |
| 1.665765785 | 3.179271642 | 0           | 5.380778879 | 1.676542978 |
| 2.658836002 | 2.994470496 | 10.70122361 | 7.389000262 | 1.891406779 |
| 2.837138973 | 4.991771463 | 4.992388485 | 5.921275388 | 0.004808052 |
| 1.520506771 | 5.209817963 | 1.126075783 | 6.348160085 | 0.644769817 |
| 2.249871131 | 5.457697804 | 1.275984658 | 8.106360339 | 1.296132181 |
| 0.000284801 | 3.461486717 | 0.000411184 | 8.364152471 | 0.000271381 |
| 0.110080178 | 0.170683322 | 0.179956975 | 6.231678605 | 2.100849188 |
| 0           | 3.849398425 | 0.906285307 | 7.527631431 | 0           |
| 2.681891194 | 2.832801985 | 0.236353794 | 7.626887856 | 0.130970122 |
| 0.868363429 | 4.477282146 | 0           | 7.202908578 | 0.870183197 |
| 0           | 4.800769525 | 7.009317144 | 5.748943797 | 0.937786278 |
| 1.131580446 | 3.667826388 | 0.044212134 | 6.152396219 | 1.734281477 |
| 0.032068669 | 4.399531155 | 0.047937944 | 6.071891217 | 0.030447698 |
| 0.155974557 | 2.459698107 | 0.269566927 | 7.048735562 | 1.638120007 |
| 2.92715133  | 4.560269608 | 0.822085578 | 7.830743581 | 0           |
| 2.084342747 | 1.747873169 | 0           | 6.385140245 | 0           |
| 1.716427262 | 6.186450969 | 3.347863197 | 6.235427617 | 1.111087569 |
| 1.514654026 | 1.581947399 | 2.260919257 | 6.625091581 | 2.145906726 |
| 1.185802561 | 3.031114651 | 0           | 5.763122675 | 1.575267956 |
| 0.037833089 | 2.566234392 | 0.056918453 | 7.07633607  | 1.164159357 |
| 3.567178008 | 3.709441399 | 0.177465907 | 6.120274756 | 1.455124906 |
| 3.783780442 | 3.778966672 | 0.981906713 | 7.036040769 | 3.43659253  |
| 0           | 4.173076021 | 0.757259258 | 6.526139204 | 1.694887844 |
| 1.663083937 | 3.807999319 | 0.021966307 | 5.470421545 | 1.065740707 |
| 2.523436673 | 3.754440655 | 0.4912158   | 4.49140445  | 1.305946337 |
| 0.810688747 | 2.50917744  | 0.806499637 | 6.617821624 | 0.813137193 |
| 0.08074181  | 4.133028238 | 0.127535805 | 8.016757032 | 0.076251482 |
| 0.664770188 | 4.892069393 | 1.524974281 | 7.209485309 | 1.866455604 |
| 0.195105012 | 3.149982736 | 0.354243173 | 7.200989974 | 1.78400759  |
| 1.586601513 | 4.324224621 | 0.000447439 | 6.394708742 | 1.586568784 |
| 0.15966643  | 4.491631996 | 1.764030913 | 9.047631574 | 0.149548427 |
| 0.125329371 | 5.649624526 | 4.297546865 | 8.337468272 | 1.520340043 |
| 0           | 4.552096725 | 0           | 7.876822047 | 0           |
| 0.010285551 | 3.394992249 | 6.602046474 | 6.73685533  | 0.009789694 |
| 1.236600773 | 3.215593754 | 0.710179743 | 6.956315551 | 1.630581186 |
| 0           | 3.272571987 | 0           | 5.517622833 | 1.081022084 |
| 0           | 5.190626195 | 0           | 5.781375529 | 0           |
| 1.266396302 | 3.737125398 | 7.326821837 | 5.901008078 | 0.05761845  |
| 0           | 3.761272044 | 0           | 6.160858061 | 0           |
| 0.014948179 | 4.014956416 | 2.685476596 | 6.067510951 | 2.080619535 |
| 0.682729634 | 2.791562237 | 1.179793694 | 5.929413455 | 1.20234033  |
| 1.382977053 | 3.42098822  | 0           | 5.348791388 | 0.833956454 |
| 4.073291458 | 4.789928087 | 0.989110384 | 7.069408309 | 1.57287143  |
| 0           | 2.909882701 | 1.950283205 | 5.927553043 | 0.753494561 |
| 0.512933583 | 1.801397823 | 0           | 6.777778162 | 1.33986102  |
| 1.433573284 | 4.129872359 | 0.406766154 | 6.515383482 | 0           |
| 1.037315136 | 5.106234895 | 0.012133026 | 4.061395196 | 1.03670061  |
| 0           | 5.217811778 | 1.331853145 | 7.471033433 | 0.538234843 |
| 1.854569783 | 4.806274067 | 0           | 6.067432576 | 0           |
| 0.893381354 | 1.84954668  | 1.448969802 | 4.816684052 | 0           |
| 0.660917288 | 3.726831368 | 6.354854076 | 5.027445874 | 2.683604554 |
| 0.010551729 | 4.778279333 | 1.645367713 | 8.230676282 | 1.046431513 |
| 3.100427051 | 4.585067856 | 6.8853942   | 4.448962569 | 2.416900598 |
| 0           | 4.466566469 | 1.332261292 | 6.856390112 | 0           |

|             |             |             |             |             |
|-------------|-------------|-------------|-------------|-------------|
| 0.170127269 | 4.255296378 | 0.299256212 | 7.0186815   | 2.345926157 |
| 0           | 5.422328537 | 0           | 5.663944628 | 1.03669979  |
| 0           | 4.011980265 | 0           | 5.655336817 | 1.369224751 |
| 0           | 5.43635219  | 2.192867908 | 7.123459355 | 0.879203406 |
| 0.020278887 | 3.729331583 | 3.846744675 | 6.934951546 | 0.019279402 |
| 0.070247686 | 3.797862811 | 2.427424653 | 7.063904528 | 1.299788925 |
| 2.781699275 | 5.551231048 | 4.624502449 | 6.258964614 | 0.640365428 |
| 0           | 1.430933523 | 0.433582521 | 7.063722473 | 1.49407572  |
| 0.00421143  | 4.938247546 | 1.609120389 | 8.367912261 | 1.018592242 |
| 0.035812538 | 1.170915948 | 0.053757541 | 6.533536711 | 0.033988094 |
| 3.072098092 | 4.79634681  | 0.072188907 | 6.049181082 | 1.204951021 |
| 0.02854514  | 3.786705157 | 9.967891042 | 6.120430591 | 1.124451974 |
| 0.062033043 | 3.21884442  | 1.291801107 | 6.205547546 | 0.05870239  |
| 0.006640126 | 3.369252789 | 3.046576163 | 6.050773724 | 1.029277742 |
| 0.019535471 | 2.122150847 | 1.091541849 | 6.557226316 | 0.018574186 |
| 0.054487009 | 2.335052813 | 1.893250402 | 7.801741675 | 0.051604244 |
| 3.267304083 | 4.182733023 | 0           | 5.768834817 | 2.179170908 |
| 1.750013704 | 4.755008571 | 0.048033004 | 5.043903588 | 1.746358155 |
| 0.646150886 | 4.367667805 | 0.643035475 | 6.034819625 | 1.535659649 |
| 0           | 2.935995424 | 3.546352529 | 6.735753783 | 1.90223345  |
| 0.04653452  | 2.620932824 | 1.218535273 | 6.430530887 | 1.815556097 |
| 0.620805051 | 5.06686442  | 8.338256883 | 4.39758968  | 1.123167945 |
| 0.028224949 | 3.519342398 | 2.999353503 | 5.015859889 | 0.02680982  |
| 1.131120505 | 1.140963634 | 1.138569268 | 8.036142595 | 1.128767973 |
| 0.104715989 | 2.631573199 | 0.170103951 | 6.93017191  | 0.098639377 |
| 1.064041401 | 5.691097085 | 0.021015558 | 6.584809997 | 1.062959829 |
| 1.930469567 | 4.492856327 | 0           | 5.39712423  | 2.513746231 |
| 0.580401629 | 5.494088694 | 0.578564196 | 6.620017007 | 0.584395273 |
| 2.004698605 | 3.813473496 | 5.39871606  | 6.028809309 | 1.003702407 |
| 0.187224161 | 0.31483093  | 0.33652474  | 6.691814767 | 2.412211005 |
| 0.131214896 | 2.784910817 | 1.624005946 | 7.161629753 | 1.54321804  |
| 1.998196739 | 3.980745685 | 0           | 6.740029976 | 1.299780557 |
| 2.388095183 | 3.2516392   | 0.016965958 | 7.07742391  | 0.011046513 |
| 0.080522295 | 0.121165134 | 1.37966475  | 6.900829503 | 1.971920107 |
| 0.688012686 | 3.055978698 | 0           | 5.456500311 | 0.691469113 |
| 3.888727737 | 6.032457337 | 0.020086517 | 6.596251775 | 1.655082855 |
| 3.236387357 | 0.060635317 | 0.063276608 | 5.832136732 | 1.793350533 |
| 0           | 1.799536069 | 0           | 6.354541157 | 1.167592255 |
| 0           | 4.072489089 | 0           | 5.86990303  | 0.854201975 |
| 0.666457324 | 2.454045815 | 0           | 6.547370867 | 1.564330776 |
| 0           | 1.385009895 | 0           | 4.940151837 | 2.380087833 |
| 0.210232356 | 3.591446967 | 0.389250734 | 10.75394128 | 0.195928023 |
| 0.905201511 | 3.842750685 | 7.389012416 | 6.120374456 | 1.474261605 |
| 0.065156672 | 2.398844021 | 0.101092471 | 7.29483541  | 0.061637255 |
| 1.53350249  | 3.389197266 | 0           | 6.479335801 | 0.957146017 |
| 2.240504569 | 3.561228079 | 0           | 4.612278249 | 0           |
| 1.871498564 | 3.978587605 | 0.087619922 | 7.516262119 | 1.244901205 |
| 0.049344402 | 4.596407057 | 1.864480218 | 8.509584165 | 0.046760237 |
| 2.223098398 | 4.343144827 | 4.358544936 | 6.769438181 | 2.642604481 |
| 2.379126338 | 4.966712688 | 12.22090436 | 8.114351873 | 1.311071314 |
| 0           | 4.941117078 | 0           | 9.432801997 | 1.374515342 |
| 0           | 5.210547389 | 0           | 6.707197421 | 0.480001707 |
| 1.339817421 | 2.476535552 | 0.123260101 | 7.208082468 | 0.073926576 |
| 0.142245324 | 3.197563154 | 1.678008282 | 5.615925934 | 0.133467878 |
| 1.956576041 | 4.516824539 | 0.117766722 | 8.786962034 | 0.070918277 |
| 0.072139567 | 3.05308224  | 0.112824497 | 4.594606297 | 0.068191099 |
| 0.94003291  | 2.980636024 | 0.488408902 | 7.667113691 | 0.492159572 |
| 2.441798699 | 3.569412877 | 2.521514488 | 6.258418092 | 0.081316905 |

| hsa-miR-548y | hsa-miR-1323 | hsa-miR-454-5p | hsa-miR-519d-3p | hsa-miR-338-3p |
|--------------|--------------|----------------|-----------------|----------------|
| 0.09296292   | 0.135482595  | 1.399131064    | 0.135511744     | 10.68636043    |
| 0.005690323  | 0.007689161  | 2.031962668    | 0.007690427     | 10.00613278    |
| 0            | 0            | 0.777338528    | 0               | 11.26032045    |
| 2.811098706  | 1.412832106  | 0.861808438    | 2.597696561     | 10.16499815    |
| 0.01300128   | 0.017677044  | 0.014083495    | 1.058350856     | 9.527231832    |
| 0.027118389  | 0.037316428  | 0.029456722    | 0.03732301      | 10.93786465    |
| 0.171447649  | 2.951391535  | 2.38854098     | 1.771418484     | 11.42328078    |
| 0            | 0            | 3.211570315    | 0               | 9.893034084    |
| 0            | 0            | 2.660175035    | 0.766454472     | 10.14735533    |
| 4.003483641  | 1.251480832  | 3.765123516    | 0               | 12.67731576    |
| 0.092821069  | 0.135258776  | 1.398541018    | 0.135287864     | 11.66240108    |
| 0.079144646  | 0.113939537  | 0.086839044    | 0.113963079     | 10.48736576    |
| 0            | 0            | 0.951223552    | 0.950712549     | 10.3793713     |
| 0.055787153  | 0.078686415  | 1.867176342    | 0.078701578     | 9.1999125      |
| 0            | 0            | 1.547610795    | 0               | 10.50694852    |
| 0.063835836  | 3.208516786  | 2.670669101    | 3.87495245      | 10.41570236    |
| 0            | 3.213472716  | 1.910847043    | 5.013626934     | 10.48970712    |
| 3.954037854  | 0            | 0              | 0               | 9.358104506    |
| 0.104186461  | 0.153370522  | 0.114865132    | 0.153404606     | 12.10311931    |
| 0            | 0            | 1.953641001    | 0.963426945     | 9.994557881    |
| 0.283012566  | 0.494012673  | 2.834419255    | 0.494190038     | 10.46850922    |
| 0.092233627  | 0.13433248   | 2.812383332    | 0.13436132      | 10.74278505    |
| 0            | 0            | 2.170254172    | 0               | 9.433871582    |
| 0.153519112  | 0.236389047  | 0.170843594    | 0.236449377     | 11.61473183    |
| 0            | 0            | 0.864353893    | 0               | 14.70458598    |
| 0            | 1.47592362   | 1.932511202    | 0.452939606     | 10.90572705    |
| 0.008435314  | 1.037872118  | 2.85779135     | 0.011426699     | 11.60627137    |
| 0.143092886  | 0.218223427  | 0.15892844     | 0.218277543     | 10.68495624    |
| 0.041853369  | 0.058325293  | 1.182850074    | 0.058336063     | 15.4902419     |
| 0            | 0            | 0              | 0               | 10.49467174    |
| 2.474933472  | 0.140461646  | 0.105796747    | 0.140492143     | 10.95218526    |
| 2.46568486   | 8.092500985  | 2.471588909    | 7.489385577     | 9.64667672     |
| 0.048050526  | 11.21403121  | 1.209477257    | 10.77468821     | 10.93050992    |
| 0            | 2.926409596  | 1.564192409    | 3.264395138     | 12.20200512    |
| 0            | 0            | 1.280890951    | 0               | 9.159623486    |
| 2.794396812  | 1.255462938  | 2.780489827    | 0               | 9.315184725    |
| 0.078785748  | 0.113386931  | 0.086439289    | 0.113410335     | 10.37406663    |
| 0.013673215  | 1.061368268  | 2.665202825    | 1.061364022     | 10.55899369    |
| 0.036868169  | 0.051158154  | 1.16134763     | 0.051167456     | 10.74293261    |
| 0.020148497  | 1.090396811  | 2.437105864    | 0.027566042     | 10.33056434    |
| 1.411235461  | 0.852109477  | 0.852857275    | 0               | 10.02334416    |
| 0.005675804  | 1.025487484  | 1.02510886     | 0.00767071      | 9.52951426     |
| 1.408151022  | 5.967787306  | 0.10845217     | 6.072587905     | 10.63584812    |
| 0.136916281  | 0.207622683  | 1.579363787    | 0.207673294     | 11.3624239     |
| 3.391576192  | 6.729502862  | 0.128053345    | 5.268632751     | 9.598175143    |
| 0.917675132  | 0            | 0.916052276    | 0               | 9.602578034    |
| 0.190465985  | 0.303624478  | 0.21342781     | 0.303710123     | 10.37241832    |
| 0.084317428  | 0.121942903  | 0.092606698    | 0.121968485     | 12.91198306    |
| 2.386813751  | 7.950066906  | 2.121362307    | 8.035769845     | 10.74320458    |
| 0.154657358  | 0.238393137  | 1.650704351    | 0.23845417      | 10.16266696    |
| 0.075314931  | 1.337394897  | 0.082576158    | 1.987435156     | 10.96963605    |
| 0            | 0            | 1.664720067    | 0               | 9.565731675    |
| 0            | 0            | 1.666660294    | 0               | 11.1905637     |
| 0.119627116  | 0.178569132  | 0.132276816    | 0.178610601     | 10.41878878    |
| 0.024279184  | 0.033328686  | 1.710732917    | 1.108898103     | 9.698307643    |
| 0            | 0            | 1.320770694    | 0               | 10.52134911    |

|             |             |             |             |             |
|-------------|-------------|-------------|-------------|-------------|
| 1.977751468 | 0.118818167 | 1.35463639  | 0.118842947 | 10.57895096 |
| 0           | 0           | 3.018508662 | 0           | 12.90112813 |
| 0.005341467 | 0.007215641 | 2.61662427  | 0.007216828 | 8.924909456 |
| 4.080802311 | 2.082443741 | 2.077337876 | 1.062301619 | 10.36314961 |
| 1.004835993 | 0           | 2.431624565 | 0           | 9.662610362 |
| 0.06667675  | 11.19898618 | 2.353509112 | 10.56207799 | 10.62246465 |
| 4.353352095 | 3.844332728 | 1.612952014 | 3.621623783 | 9.886165741 |
| 2.776049479 | 0           | 1.500827084 | 0           | 10.95752079 |
| 2.648577534 | 0.750956854 | 1.669103288 | 0           | 11.01999429 |
| 0.000300099 | 0.00040368  | 1.001330068 | 0.000403746 | 10.94473283 |
| 0.117629287 | 0.175269556 | 2.597617667 | 0.175310029 | 8.670103933 |
| 0           | 0           | 0.906005554 | 0.905264571 | 10.61757534 |
| 0.149656975 | 0.229619903 | 1.630675456 | 0.229677887 | 10.44544185 |
| 0.866495337 | 0           | 1.420579891 | 0           | 10.61245639 |
| 0.935872263 | 4.751009718 | 3.491956375 | 5.101984816 | 10.71127062 |
| 0.031367814 | 0.04332101  | 2.499081219 | 0.043328754 | 9.825931368 |
| 0.033930981 | 0.046963956 | 1.148644093 | 0.046972418 | 10.6671656  |
| 0.167612525 | 0.261498983 | 0.187021098 | 0.261568341 | 12.81290249 |
| 3.993970467 | 0           | 1.367218511 | 0           | 10.93060656 |
| 3.326485451 | 0           | 2.54639635  | 0           | 10.31961229 |
| 0.026893368 | 2.980985388 | 2.147922681 | 3.501261672 | 9.170239713 |
| 0.129191377 | 0.194529801 | 2.206470239 | 0.194576209 | 10.45669356 |
| 0           | 0           | 1.171754452 | 0           | 10.05538749 |
| 0.040059884 | 0.055739775 | 2.217599355 | 0.055750011 | 9.737097725 |
| 0.116167372 | 0.172862533 | 0.128366767 | 0.172902285 | 11.04069879 |
| 0           | 0           | 0.98192858  | 0           | 10.51761402 |
| 0           | 0           | 1.982263811 | 0           | 13.69509504 |
| 1.068063235 | 0.021544827 | 1.667395859 | 0.021548493 | 10.52847116 |
| 0           | 0           | 2.176478506 | 0           | 9.884220891 |
| 0           | 0           | 2.054635161 | 0           | 10.07908005 |
| 0.085962668 | 0.124503684 | 2.010587944 | 0.12452993  | 9.739993211 |
| 0           | 0           | 2.298155359 | 0           | 11.55469252 |
| 2.500750444 | 0.342341327 | 1.870993625 | 0.342443211 | 9.761307049 |
| 0.000326552 | 0.000439273 | 2.323836861 | 0.000439344 | 9.955154208 |
| 0.171656567 | 1.772413428 | 2.837497339 | 0.268896734 | 11.64225955 |
| 0.134177221 | 2.290925416 | 1.568279377 | 1.602050075 | 11.11580216 |
| 0           | 0           | 1.435521989 | 0           | 10.84707345 |
| 1.640056795 | 6.206834749 | 2.060640469 | 5.935447294 | 10.46080458 |
| 1.231086812 | 0           | 1.607022381 | 0.707231105 | 9.8966167   |
| 0           | 0           | 1.058579146 | 0           | 13.33976928 |
| 0           | 0.857071639 | 1.412945925 | 0           | 12.84371051 |
| 1.27213468  | 6.795447008 | 1.90993246  | 6.344283537 | 9.895042234 |
| 0           | 0           | 0.97072081  | 0           | 10.52926717 |
| 0.015781252 | 1.671141593 | 1.667256285 | 1.070815715 | 9.506907455 |
| 1.875801502 | 0           | 0.674836443 | 0           | 9.459025191 |
| 0           | 0           | 2.561208519 | 0           | 11.50050488 |
| 0.989358667 | 0           | 1.98611933  | 0           | 10.15175648 |
| 3.090854787 | 2.198005058 | 1.270534074 | 2.76117824  | 13.16107483 |
| 5.696870274 | 0           | 2.036810953 | 0.50828729  | 9.241257939 |
| 0           | 0           | 2.164553223 | 0.401766816 | 13.25819339 |
| 0.008787557 | 0.011905419 | 1.631041053 | 0.011907399 | 10.00976025 |
| 0           | 0.529012436 | 1.340147034 | 0           | 10.87893811 |
| 0           | 0           | 2.642177586 | 0           | 11.26458314 |
| 2.850455014 | 0           | 0.88976308  | 0           | 9.551958124 |
| 0           | 5.193586124 | 1.154313826 | 5.534414883 | 10.37567751 |
| 0.011133419 | 0.015113526 | 2.386210596 | 0.015116059 | 14.24221721 |
| 0.01817282  | 4.712009039 | 0.019705402 | 4.125395477 | 12.79083584 |
| 0           | 0           | 1.730969318 | 0           | 10.17805279 |



|             |             |             |             |             |
|-------------|-------------|-------------|-------------|-------------|
| 0.18313378  | 0.289914844 | 1.76362977  | 0.289995031 | 10.79296242 |
| 0.321199718 | 0           | 2.77356267  | 0           | 9.330010884 |
| 0.815063046 | 0.811349656 | 1.356184109 | 0           | 10.03029863 |
| 0           | 1.179218355 | 2.234107521 | 0.435226177 | 10.16639614 |
| 0.021423858 | 1.096112135 | 2.933410784 | 1.096105502 | 10.37991402 |
| 3.201292006 | 2.429537013 | 1.957705316 | 1.33457714  | 11.37372944 |
| 3.894395614 | 2.012953906 | 2.25149021  | 1.480205967 | 10.37135242 |
| 0           | 0.428668257 | 1.684507211 | 0.84503741  | 8.865429695 |
| 0.004439926 | 0.005993221 | 0.004801454 | 1.019938052 | 10.82870381 |
| 0.037910548 | 0.052651708 | 2.206340857 | 0.052661312 | 14.26301136 |
| 3.080590172 | 0.070646094 | 1.219220604 | 0.070659483 | 11.73760848 |
| 0.030189101 | 8.136536744 | 2.75875499  | 9.285833683 | 9.97089787  |
| 0.065887861 | 0.093755754 | 2.949841069 | 0.093774378 | 9.919557234 |
| 0.007002611 | 1.623346016 | 1.621733838 | 1.623344294 | 10.52709843 |
| 0.020636479 | 0.028240517 | 1.692166145 | 0.028245397 | 9.067878844 |
| 0.05781728  | 0.081694049 | 1.251212632 | 0.081709888 | 10.01589681 |
| 3.460498045 | 0.697671974 | 2.550189752 | 0           | 13.85825277 |
| 3.189575225 | 1.769262058 | 2.185722457 | 1.769254559 | 9.397053055 |
| 0           | 0           | 1.50833922  | 0           | 13.42207854 |
| 0           | 1.853292084 | 1.873095482 | 2.492678825 | 10.94795938 |
| 0.049328537 | 0.069187817 | 1.835692206 | 0.06920089  | 9.860208345 |
| 0.617000456 | 6.244634155 | 2.224956466 | 5.762739105 | 10.30021975 |
| 0.029849236 | 1.133854814 | 1.130947379 | 0.041177534 | 13.33044993 |
| 0.031256283 | 1.140155808 | 1.746008339 | 0.043170569 | 13.67011051 |
| 0.111822574 | 0.165745817 | 1.477092309 | 0.165783464 | 14.39487998 |
| 0.01513343  | 0.020613191 | 1.066728762 | 0.020616691 | 11.17747269 |
| 0           | 0           | 1.926514875 | 0           | 11.58223103 |
| 0           | 0           | 0.571627756 | 0           | 10.01797242 |
| 3.59018028  | 4.465699487 | 1.589618069 | 6.235199047 | 10.2872866  |
| 0.201950209 | 0.32547663  | 0.22677829  | 0.325571291 | 9.080680038 |
| 3.272075381 | 0.213896392 | 0.156063474 | 0.213949067 | 9.215342953 |
| 0.757772351 | 0           | 2.451970988 | 0           | 10.25555011 |
| 0.012249365 | 0.016644116 | 2.392565593 | 0.016646916 | 11.21734143 |
| 0.085726587 | 0.124135774 | 2.009488441 | 0.124161924 | 8.99688088  |
| 0           | 0.681105737 | 2.122052244 | 1.183153618 | 10.66221201 |
| 3.082863342 | 0.01970275  | 1.0638318   | 0.019706088 | 11.09966376 |
| 0.0443576   | 0.061948776 | 0.048344148 | 0.061960304 | 11.30469987 |
| 0           | 0.648660162 | 0.647193817 | 0           | 9.957300143 |
| 0           | 0           | 2.372869078 | 0           | 13.20789752 |
| 0           | 0           | 3.858066952 | 0           | 11.7279929  |
| 0           | 0           | 1.391269846 | 0           | 8.934417402 |
| 0.22738517  | 0.375581824 | 0.25653723  | 0.375698626 | 10.62722498 |
| 4.11243669  | 6.719007331 | 1.46689188  | 6.731162564 | 9.217084612 |
| 0.069233083 | 0.098805035 | 1.29964352  | 0.09882486  | 10.84105366 |
| 0           | 0           | 1.530952743 | 0           | 12.55457116 |
| 0           | 0           | 1.99988444  | 0           | 10.72322885 |
| 0.060502581 | 0.085688586 | 0.066146539 | 0.085705335 | 11.57006669 |
| 0.052325951 | 1.866729627 | 0.057116767 | 1.866719078 | 11.87404956 |
| 3.019594446 | 0.221062982 | 0.160802892 | 3.877299639 | 10.19190354 |
| 0.077637076 | 8.899615783 | 2.407698289 | 9.882058362 | 11.10030895 |
| 0           | 0           | 2.327852377 | 0           | 13.85739353 |
| 0           | 0.471875266 | 2.816151383 | 0           | 11.43773168 |
| 0.083293234 | 0.120352497 | 0.091463829 | 0.12037767  | 9.67408178  |
| 0.152603789 | 0.234780463 | 0.169795754 | 0.234840233 | 10.51100367 |
| 0.079843626 | 0.115016771 | 2.41849001  | 0.115040585 | 11.47876335 |
| 0.076720761 | 0.110214148 | 0.084140282 | 0.110236758 | 9.346155039 |
| 0           | 0           | 2.476092252 | 0.483813984 | 11.7062645  |
| 0.091789202 | 2.073085015 | 2.476253679 | 1.411222688 | 11.40790047 |

| hsa-miR-200c-3p | hsa-miR-3682-3p | hsa-miR-376a-2-5 | hsa-miR-9-3p | hsa-miR-6783-3p |
|-----------------|-----------------|------------------|--------------|-----------------|
| 6.322906406     | 0.123998471     | 0.078019564      | 2.079310549  | 0.072447657     |
| 5.655872406     | 3.207422076     | 1.02343413       | 0.007483963  | 1.022907728     |
| 7.701113617     | 3.226697465     | 0                | 1.564032865  | 0.397685757     |
| 6.707033074     | 3.483556813     | 1.430562447      | 3.586039637  | 0               |
| 6.202279614     | 4.087288712     | 0.011189589      | 3.085600333  | 0.010489595     |
| 6.421736753     | 1.122736707     | 0.023232878      | 3.98976507   | 0.021741206     |
| 7.096038644     | 3.27134335      | 0.140621528      | 2.477287944  | 0.129499229     |
| 7.865584596     | 2.29821525      | 1.070637174      | 0            | 2.218582515     |
| 6.648632711     | 3.08887965      | 0                | 0            | 1.325307681     |
| 6.543628773     | 3.651826952     | 0                | 0            | 2.468220087     |
| 10.6854149      | 2.859761496     | 0.077903868      | 2.868914217  | 0.072341373     |
| 8.716034828     | 1.356400472     | 1.936059157      | 0.110151698  | 1.301940094     |
| 6.276197786     | 2.253135818     | 0                | 0.950325893  | 0               |
| 7.168900201     | 4.056213466     | 0.047360046      | 3.354111724  | 2.583282358     |
| 7.382406368     | 1.957879715     | 0                | 1.957630203  | 0               |
| 5.015329166     | 3.394763764     | 0.054056621      | 0.087788184  | 0.050363498     |
| 6.630011473     | 3.327570744     | 1.246677908      | 6.760081825  | 0.725062172     |
| 7.659773671     | 3.756134335     | 0                | 5.487494718  | 2.331103925     |
| 9.082785909     | 2.580683262     | 3.066240784      | 1.469469058  | 2.452244038     |
| 5.962344642     | 1.539967407     | 0.966179941      | 1.95094306   | 0               |
| 8.609740167     | 2.267206742     | 0.225310906      | 0.46624397   | 0.205363418     |
| 7.564897774     | 1.414913453     | 0.07742464       | 2.075549734  | 0.071901092     |
| 6.285492073     | 0.885322966     | 5.105236561      | 1.444268144  | 0               |
| 6.689254311     | 2.834705556     | 1.575205188      | 2.387335633  | 1.556856595     |
| 6.339317977     | 2.385836002     | 2.82820891       | 0.862502656  | 0               |
| 11.85063078     | 3.014458764     | 2.180087466      | 1.700464729  | 0.471286849     |
| 16.26063677     | 3.225348543     | 0.007270731      | 1.631334482  | 2.041267602     |
| 5.776633255     | 4.163715491     | 0.118319677      | 2.796187442  | 0.109276816     |
| 7.738096494     | 3.068446207     | 0.035687872      | 0.05658595   | 0.033336562     |
| 6.670055441     | 2.843598765     | 0.801415845      | 1.71103518   | 0               |
| 6.948585768     | 2.538042178     | 0.08058338       | 1.433093924  | 0.074802091     |
| 7.510572985     | 3.757589764     | 0.022586981      | 0.0352151    | 1.104487753     |
| 8.326009508     | 4.310624804     | 1.192385259      | 0.065275802  | 0.038169092     |
| 6.788542311     | 0.673280941     | 0                | 0            | 0               |
| 6.803939689     | 0.74854861      | 1.301585512      | 0.749769762  | 0               |
| 5.807353976     | 3.478932549     | 2.244097494      | 0            | 1.290326308     |
| 5.888911489     | 2.445437517     | 0.066408256      | 0.109621309  | 0.061764524     |
| 7.699154228     | 2.405912512     | 2.068496529      | 0.018092213  | 1.054717038     |
| 7.272088963     | 3.233530579     | 1.148707521      | 1.785127133  | 0.029430268     |
| 7.200268705     | 3.717796077     | 1.082177711      | 4.662105854  | 1.080241398     |
| 6.192463592     | 2.94387444      | 0                | 2.110264911  | 0               |
| 5.398478421     | 3.037069514     | 0.004896633      | 1.025681038  | 1.022849524     |
| 6.588707104     | 2.890462308     | 0.0825095        | 1.44375474   | 1.999564458     |
| 7.233882601     | 0.187922603     | 0.113415677      | 0.199532098  | 1.50204978      |
| 7.888316049     | 5.796661705     | 0.096593875      | 5.590791293  | 0.089469404     |
| 5.352087064     | 3.676674591     | 2.220537731      | 0            | 1.494479432     |
| 6.368304217     | 3.018932058     | 0.155392602      | 0.290026608  | 0.142834023     |
| 7.313434255     | 2.475184278     | 0.070950431      | 0.117829129  | 1.320499982     |
| 5.632252792     | 3.673012284     | 0.860690346      | 4.965649418  | 0               |
| 7.967712767     | 0.214760415     | 1.579078826      | 0.228657834  | 0.117575206     |
| 6.394571069     | 3.2642806       | 0.063550601      | 1.987877323  | 0.0591302       |
| 6.656481814     | 2.421755387     | 2.259376466      | 0.745826142  | 0               |
| 8.636896611     | 2.427046707     | 1.048234742      | 2.564838272  | 0               |
| 8.422554109     | 0.162348721     | 0.099598431      | 0.17192671   | 0.092215144     |
| 6.681313459     | 2.961242563     | 0.020819542      | 1.717486338  | 0.019489654     |
| 6.954787227     | 2.009490433     | 0                | 0            | 0               |

|             |             |             |             |             |
|-------------|-------------|-------------|-------------|-------------|
| 6.227805184 | 2.464373532 | 0.069298414 | 0.114832577 | 0.064426752 |
| 15.47182922 | 3.387816815 | 2.311163753 | 2.023679118 | 1.1666008   |
| 7.38782226  | 2.354968904 | 0.0046087   | 1.024168943 | 2.612186533 |
| 7.715450237 | 3.551199845 | 0.011944414 | 4.095139757 | 1.055545111 |
| 11.8015094  | 2.900679574 | 0           | 0           | 0.555580174 |
| 7.186682561 | 4.229152522 | 3.648642358 | 2.720961166 | 1.875107526 |
| 7.98153666  | 4.791327308 | 0.004592851 | 2.031801746 | 2.026155749 |
| 7.235162961 | 2.723687739 | 2.09200755  | 2.410271388 | 0           |
| 8.454026378 | 1.960733753 | 0           | 4.388384208 | 0           |
| 7.736921025 | 0.000377368 | 0.000259361 | 4.089554814 | 1.001213013 |
| 6.129307371 | 2.198791699 | 0.097993082 | 0.168785148 | 1.436934061 |
| 8.741375221 | 2.858456857 | 0           | 1.467546814 | 1.48344055  |
| 8.748938981 | 2.357038879 | 0.123513068 | 0.220365153 | 0.113995761 |
| 6.928084425 | 2.385372583 | 0           | 2.383574375 | 0.874453947 |
| 8.485857695 | 3.222217116 | 1.923548366 | 3.220671341 | 2.245687527 |
| 7.985194065 | 3.371275893 | 0.026836736 | 0.042069275 | 1.726922615 |
| 6.409604087 | 1.768524597 | 0.029005799 | 1.153222224 | 0.027120799 |
| 7.323058806 | 2.444581471 | 0.13762494  | 2.458081285 | 0.126788357 |
| 8.007924878 | 0.817943761 | 1.383150715 | 2.889427829 | 0           |
| 6.425949388 | 2.530367765 | 0.826567384 | 4.221124884 | 0           |
| 6.946832708 | 3.984412436 | 0.023041769 | 3.174861173 | 2.717575126 |
| 7.521346937 | 2.256254767 | 0.107258634 | 3.954872964 | 1.476161645 |
| 8.3126587   | 3.256099759 | 0.681300974 | 1.162939341 | 0           |
| 6.211550434 | 2.562848734 | 1.161240234 | 2.234216989 | 0.031933173 |
| 6.72105655  | 2.643349833 | 0.096817205 | 2.198263207 | 0.089673568 |
| 7.30080082  | 3.431972897 | 0           | 0.981563752 | 0           |
| 10.80417335 | 3.60182868  | 0.767260191 | 2.616057257 | 0           |
| 6.668589921 | 3.80550056  | 2.078971535 | 0.020951348 | 1.063160661 |
| 8.888616849 | 1.965004489 | 0.95837144  | 4.294484375 | 1.620949543 |
| 6.496494412 | 3.016884261 | 0.815524129 | 0.802884262 | 1.770892109 |
| 6.709788453 | 0.114144409 | 0.072298482 | 3.10499169  | 0.06718804  |
| 14.46884468 | 3.594833556 | 0           | 1.519855174 | 1.193381206 |
| 6.933792    | 2.651603031 | 0.170909878 | 3.498922297 | 2.823268811 |
| 8.939049047 | 2.001944896 | 0.00028222  | 0.000427748 | 1.001319911 |
| 7.895678213 | 2.464194805 | 1.636355786 | 2.47833372  | 0.12964669  |
| 9.011354036 | 3.080053142 | 0.11123558  | 5.294002737 | 0.102830115 |
| 6.329377734 | 2.403614643 | 0.883529007 | 5.603504121 | 0           |
| 6.122789992 | 3.393527295 | 0.009346532 | 3.881575233 | 0.00876421  |
| 7.16619258  | 2.705109595 | 2.201117571 | 1.89155406  | 2.211834696 |
| 15.79954725 | 3.79667009  | 1.08751162  | 1.406254228 | 0           |
| 7.620918144 | 3.102002296 | 0.866035217 | 2.374184243 | 0.868642343 |
| 6.766594921 | 2.703774075 | 0.054735151 | 1.932178199 | 0.050990804 |
| 7.121058732 | 3.41485176  | 0           | 3.414091703 | 0           |
| 5.470145772 | 3.27282201  | 1.659787414 | 0.020914998 | 0.012716531 |
| 7.617009638 | 3.628074439 | 0           | 1.546257648 | 1.911608071 |
| 7.750720731 | 1.762666703 | 2.366360342 | 0.824447224 | 1.394384467 |
| 7.285688181 | 2.56929583  | 3.308593463 | 2.791204736 | 2.309447561 |
| 6.950840167 | 1.949573793 | 0           | 0           | 0.760660706 |
| 5.496382897 | 4.833907768 | 0           | 4.141828354 | 1.36206122  |
| 7.541992919 | 1.605610529 | 1.178195985 | 1.604122628 | 0           |
| 7.67145142  | 3.517845649 | 1.626955642 | 9.196284288 | 2.042969697 |
| 5.639204767 | 1.323849366 | 0           | 0.525388688 | 0           |
| 7.485735969 | 2.412228298 | 2.178098746 | 2.152790954 | 0.891216171 |
| 7.288592604 | 2.643096885 | 3.859803474 | 4.464729866 | 3.187203741 |
| 7.033050697 | 4.111859208 | 2.526859441 | 1.145498878 | 0           |
| 9.029583657 | 2.87881119  | 1.63802547  | 2.066261635 | 1.044637976 |
| 7.831744673 | 2.106837146 | 4.183343437 | 6.634427694 | 0.014627888 |
| 6.091064565 | 2.02791004  | 2.067051278 | 1.718974214 | 0           |

|             |             |             |             |             |
|-------------|-------------|-------------|-------------|-------------|
| 7.020915086 | 2.982719976 | 0.149715222 | 0.277171048 | 0.13771413  |
| 8.944093247 | 1.955985885 | 0           | 1.638821301 | 1.332151403 |
| 6.152567277 | 2.523227639 | 1.372774292 | 0.809847463 | 0           |
| 6.928343982 | 2.039504037 | 0.886552799 | 2.681362665 | 0.453219174 |
| 6.948204029 | 1.701588133 | 1.685908002 | 7.883427701 | 1.085239622 |
| 7.049227628 | 3.032174886 | 1.293896179 | 0.103590629 | 1.285852001 |
| 6.372011667 | 3.541994416 | 1.149565398 | 1.478240709 | 1.158146804 |
| 5.976191183 | 2.449128135 | 0.877312897 | 0.840412499 | 0.446556132 |
| 8.363520724 | 2.613160686 | 0.003831972 | 1.02009116  | 1.017890717 |
| 8.251685253 | 1.789656995 | 0.032366509 | 0.051100005 | 2.178235642 |
| 7.844020548 | 2.28952488  | 2.833694116 | 3.91397475  | 1.196011636 |
| 6.07146645  | 3.192429286 | 1.122308507 | 2.507026844 | 0.024169998 |
| 16.52539505 | 2.710724306 | 0.055758648 | 0.090755161 | 0.051936815 |
| 7.039773493 | 3.045672425 | 1.618493493 | 3.046364975 | 0.005665196 |
| 6.147509693 | 3.303812988 | 0.017716779 | 1.697783514 | 1.082154952 |
| 6.721907818 | 1.894242135 | 1.230010512 | 2.334676035 | 1.838978855 |
| 8.026045441 | 3.888019009 | 1.623951108 | 2.335609621 | 1.242554654 |
| 8.12446205  | 4.979910476 | 0.029060961 | 4.034496845 | 1.134007829 |
| 7.139271146 | 2.031228267 | 1.543127611 | 2.581216481 | 0.658852154 |
| 7.485406041 | 2.809141404 | 0           | 1.852495156 | 1.22350505  |
| 4.98084625  | 3.481223783 | 0.041962324 | 1.222573544 | 0.039162483 |
| 10.85829051 | 3.58855741  | 0.62843679  | 2.812893058 | 1.822091294 |
| 8.196230581 | 1.135055478 | 0.025549979 | 2.504987216 | 0.023901503 |
| 7.277686476 | 2.511193903 | 0.026742273 | 1.141166607 | 2.47336326  |
| 9.514755657 | 3.467576084 | 0.093316702 | 0.159710101 | 0.086472117 |
| 8.046393877 | 2.08916121  | 1.061930387 | 3.099442652 | 0.012198081 |
| 7.547835718 | 2.722954364 | 0           | 5.036928366 | 0           |
| 6.677558915 | 3.176936713 | 0           | 1.394268799 | 1.086539443 |
| 6.800890687 | 3.590905    | 0.000762328 | 1.589829759 | 1.003564487 |
| 5.24005101  | 3.075337329 | 0.164241995 | 1.913102743 | 0.150801134 |
| 7.002121904 | 3.820421403 | 0.116326582 | 4.018160189 | 2.153303875 |
| 8.480737312 | 2.932840224 | 0.766486478 | 1.275491031 | 1.706901656 |
| 6.934292945 | 3.079465774 | 1.050224752 | 2.072850634 | 0.009886304 |
| 7.463863423 | 3.094108522 | 0.072105126 | 0.119931333 | 0.06701014  |
| 7.637217065 | 2.496130063 | 0           | 0.678569712 | 0.699814145 |
| 6.805041283 | 3.264420322 | 0.012450348 | 2.085952847 | 0.011669323 |
| 7.7878404   | 2.856951075 | 0.037793124 | 3.876513384 | 0.035292465 |
| 7.270155629 | 2.256428256 | 0.662659442 | 0           | 0.667907188 |
| 9.669889385 | 4.004331984 | 1.414052766 | 0           | 0.858922053 |
| 9.474973763 | 3.137288705 | 0.673596047 | 1.152744554 | 1.888440245 |
| 6.668993676 | 3.554564932 | 1.808979624 | 1.780965626 | 0           |
| 7.812937346 | 2.017537231 | 0.183660226 | 0.357133682 | 0.168227902 |
| 6.66726687  | 2.182737976 | 0.907884809 | 1.866300552 | 2.206584703 |
| 5.598378709 | 1.953425614 | 0.058528743 | 2.398327032 | 0.054495864 |
| 6.794936974 | 1.939104758 | 0.957781837 | 0           | 0.958677657 |
| 8.015902933 | 3.23850417  | 1.118655182 | 0.603065276 | 0           |
| 6.893687593 | 2.345856137 | 0.051287338 | 1.272864482 | 1.233920135 |
| 8.290678177 | 3.499235732 | 0.044470069 | 1.236066269 | 1.81624306  |
| 6.845202723 | 3.842346759 | 0.119621216 | 1.652529572 | 0.110460018 |
| 9.207734003 | 1.99665205  | 1.304909225 | 1.349958245 | 2.347434969 |
| 14.3777908  | 2.885770136 | 0           | 4.864545262 | 0           |
| 8.979919625 | 3.790631832 | 0           | 2.533014974 | 1.305657747 |
| 6.369647471 | 3.974434195 | 0.070110576 | 0.116304114 | 0.065174491 |
| 7.78363254  | 2.371459757 | 0.125838478 | 2.382731212 | 2.195198925 |
| 7.229892779 | 1.359527393 | 0.067278064 | 1.359886499 | 0.062565953 |
| 6.789082346 | 2.434288888 | 0.064708793 | 0.106575359 | 0.060198122 |
| 5.868947336 | 1.252425513 | 1.310878949 | 1.253099646 | 0.964841219 |
| 8.551891704 | 2.515098472 | 0.077061972 | 4.491452136 | 0.071567862 |

| hsa-miR-515-5p | hsa-miR-519b-3p | hsa-miR-4536-3p | hsa-miR-3677-5p | hsa-miR-525-5p |
|----------------|-----------------|-----------------|-----------------|----------------|
| 0.130666231    | 0.124575822     | 0.064237465     | 2.067725762     | 0.137534447    |
| 0.007478066    | 0.007205798     | 1.022048118     | 2.033373124     | 0.007777982    |
| 0              | 0               | 1.182598984     | 2.579911174     | 0              |
| 1.810923291    | 2.381817468     | 1.440433884     | 3.372864239     | 2.787030883    |
| 0.017180484    | 0.016540996     | 0.009432918     | 3.405780468     | 0.017886174    |
| 0.036221523    | 0.034815679     | 0.019499455     | 2.484146209     | 0.037778417    |
| 2.47709573     | 1.768760276     | 1.583156686     | 2.444991854     | 2.95139128     |
| 0              | 0               | 1.776607579     | 3.354460848     | 0              |
| 0              | 0               | 0               | 4.018612262     | 0              |
| 1.24967373     | 0               | 0               | 3.659659788     | 0.735433252    |
| 0.130452273    | 0.12437412      | 2.97883423      | 0.117570432     | 0.137306381    |
| 1.35676808     | 0.105100426     | 1.907496674     | 0.099545332     | 0.115595708    |
| 0              | 0               | 0.956903878     | 2.253991529     | 0              |
| 1.885552484    | 0.072962115     | 0.039408327     | 3.931004818     | 2.323047652    |
| 0              | 0               | 0               | 3.27548182      | 0              |
| 1.287888575    | 1.287936007     | 0.044875187     | 4.483277257     | 5.386300488    |
| 4.357985678    | 3.32691304      | 1.659879004     | 2.359797276     | 4.578741167    |
| 0              | 0               | 0.814943204     | 1.719916317     | 0              |
| 0.147745802    | 0.140653266     | 0.071529902     | 3.181658479     | 0.155771049    |
| 0              | 0               | 1.548024622     | 2.271644025     | 0.963637709    |
| 0.465473304    | 0.431416088     | 1.898528664     | 2.237102135     | 0.506640847    |
| 0.129566723    | 0.123539215     | 0.063760456     | 0.116791064     | 0.136362539    |
| 0              | 0               | 0               | 2.642015256     | 0              |
| 0.226492079    | 0.214176369     | 0.102561431     | 0.200645092     | 0.240648816    |
| 0              | 0               | 0               | 2.130542189     | 0              |
| 0              | 0               | 0               | 3.111524279     | 0.881492306    |
| 0.011108426    | 0.0107006       | 0.006138166     | 1.630815964     | 0.011557966    |
| 0.209334251    | 0.198240412     | 0.09613551      | 2.311233751     | 0.222042273    |
| 0.056536132    | 0.054246283     | 0.029818999     | 1.188204401     | 0.059081744    |
| 0              | 0               | 1.763299405     | 2.848432628     | 0.791034896    |
| 0.13542429     | 0.12905943      | 1.345555549     | 3.138832183     | 0.142608713    |
| 5.673311699    | 5.176669664     | 0.018961796     | 1.726743471     | 9.237018853    |
| 9.178453288    | 9.072443598     | 0.034103816     | 0.059481525     | 10.40121945    |
| 4.351107608    | 3.056340787     | 1.931616946     | 1.176833752     | 2.793834568    |
| 0              | 0               | 0.775450774     | 2.432702069     | 0              |
| 0              | 0               | 1.301243723     | 4.273941735     | 1.939139912    |
| 0.109513861    | 0.104599228     | 2.925537929     | 2.437888826     | 0.115033301    |
| 1.061835702    | 0.017403358     | 1.052615331     | 1.659056983     | 0.018821756    |
| 0.04961212     | 0.047631247     | 1.742867521     | 1.16592359      | 0.051811361    |
| 0.026769717    | 0.025751835     | 0.014551856     | 0.024589595     | 0.027894975    |
| 0              | 0               | 0.868466782     | 1.401834234     | 0              |
| 0.007458902    | 0.007187345     | 0.004137524     | 0.006876144     | 0.007758035    |
| 5.088198645    | 5.135694619     | 0.067831573     | 2.540392021     | 7.449019782    |
| 0.199302769    | 0.188901779     | 1.477290663     | 0.17741363      | 0.211193083    |
| 5.121826019    | 3.260483718     | 1.410377666     | 2.969036917     | 6.713155651    |
| 0              | 0               | 0               | 2.684678465     | 0              |
| 0.289643834    | 0.272433711     | 0.124804856     | 1.839426306     | 0.309684316    |
| 0.117711817    | 0.112350095     | 0.05855745      | 2.803491039     | 0.123742986    |
| 6.661639281    | 6.404193142     | 0.867885586     | 3.472304213     | 9.454225306    |
| 0.228382492    | 0.215929324     | 0.103258857     | 0.202252053     | 0.242702729    |
| 2.770188181    | 0.099764266     | 0.052583345     | 1.979520684     | 0.109613459    |
| 0              | 0               | 0.771764824     | 2.426407693     | 0              |
| 0              | 0               | 0               | 2.83243515      | 0              |
| 0.17173804     | 0.163158664     | 0.081417094     | 0.153631674     | 0.181491949    |
| 0.03235924     | 0.031113724     | 0.017489263     | 1.109499118     | 2.142932044    |
| 0              | 0               | 0.804891233     | 1.314162183     | 0              |

|             |             |             |             |             |
|-------------|-------------|-------------|-------------|-------------|
| 0.114718896 | 0.109521661 | 0.057226263 | 3.064494432 | 0.120561629 |
| 0           | 0           | 1.180787795 | 3.6418832   | 0           |
| 0.007017764 | 0.006762526 | 0.003894645 | 3.356685255 | 0.007298896 |
| 2.082469591 | 1.062931064 | 0.010066443 | 1.660180742 | 0.019113118 |
| 0           | 0           | 0.566102658 | 4.140745533 | 0           |
| 8.64064203  | 8.89928739  | 0.046792459 | 3.728392411 | 12.30765481 |
| 2.031799859 | 0.006739149 | 0.003881274 | 3.942079967 | 4.792882682 |
| 0           | 0           | 1.177967597 | 2.986909825 | 0           |
| 0           | 0           | 0.774702875 | 2.78474325  | 0           |
| 0.000392786 | 0.000378718 | 2.586423039 | 1.001359137 | 0.000408261 |
| 0.168600923 | 0.160221194 | 2.044909284 | 2.188761765 | 0.178121906 |
| 0.904499486 | 0           | 0.916505389 | 2.449708064 | 0           |
| 0.220103237 | 0.208247921 | 1.516905995 | 0.195206281 | 0.233713124 |
| 0           | 0           | 0           | 3.376403402 | 0           |
| 4.538571981 | 4.289419762 | 0.942081508 | 3.707952055 | 5.935626374 |
| 0.042033387 | 0.040381617 | 0.022494821 | 3.520154074 | 1.139823485 |
| 0.045557183 | 0.043753577 | 1.128332267 | 2.194661162 | 0.047558084 |
| 0.250141952 | 0.236066213 | 0.111141144 | 3.227358353 | 0.266399938 |
| 0.818725061 | 0           | 0.839200714 | 1.756703585 | 0           |
| 0           | 0           | 1.390923764 | 1.750708634 | 0.816937092 |
| 1.121509416 | 2.15729971  | 0.019340397 | 2.974253332 | 3.766815625 |
| 0.186893776 | 0.177327783 | 0.087459831 | 3.036880864 | 0.197802334 |
| 0           | 0           | 0           | 2.293911356 | 0           |
| 0.054039071 | 0.051861563 | 1.150733079 | 3.711270642 | 0.056458648 |
| 0.16631156  | 0.158076534 | 0.079216012 | 2.970463271 | 0.175663873 |
| 0           | 0           | 0           | 2.559278914 | 0           |
| 0           | 0           | 1.321704302 | 3.075131696 | 0           |
| 0.020934308 | 0.020148521 | 1.060719908 | 3.423559507 | 0.021802047 |
| 0           | 0           | 0.986421763 | 3.184308548 | 0           |
| 0           | 0           | 0           | 2.516193563 | 0           |
| 0.120163663 | 0.114666108 | 0.059642632 | 1.383908643 | 0.126350583 |
| 0           | 0           | 2.160269863 | 0           | 0.659811768 |
| 0.325757583 | 0.30547066  | 0.136628277 | 2.625988794 | 0.349559047 |
| 0.000427417 | 0.000412108 | 0.000238879 | 1.001478934 | 0.000444259 |
| 0.257027023 | 1.769693026 | 0.11358106  | 1.758096925 | 0.273919623 |
| 2.749033153 | 0.184784559 | 2.100920572 | 1.59526836  | 0.206422585 |
| 0           | 0           | 0           | 1.833122772 | 0           |
| 4.244804739 | 4.073186268 | 1.04186148  | 2.38780004  | 6.819701283 |
| 0           | 0.703434645 | 0.733231985 | 3.612471476 | 0.708814106 |
| 0           | 0           | 1.491917031 | 2.635778314 | 0           |
| 0           | 0           | 1.436132893 | 3.105687323 | 0           |
| 4.74600989  | 3.573179397 | 0.045427725 | 1.289674595 | 6.570384831 |
| 0           | 0           | 0.97419017  | 0           | 0           |
| 0.020897988 | 1.671169804 | 1.65437364  | 2.417288607 | 0.021764145 |
| 0           | 0           | 0           | 3.787820469 | 0.677595429 |
| 0           | 0           | 0           | 0.823787192 | 0           |
| 0           | 0           | 0           | 2.569528521 | 0.989053079 |
| 1.644990288 | 1.261911953 | 0.767808713 | 2.606796293 | 3.042848255 |
| 0           | 0           | 0.538289005 | 3.593856723 | 0.95667651  |
| 0           | 0           | 0           | 2.996360511 | 0.404495142 |
| 0.011575369 | 0.011149948 | 0.00639303  | 5.058466566 | 0.012044346 |
| 0           | 0           | 0.559061851 | 2.050460701 | 0.984592102 |
| 0           | 0           | 1.462147627 | 0.879948115 | 0           |
| 0           | 0           | 0           | 2.645478847 | 0           |
| 3.927159469 | 4.267125365 | 1.590631937 | 2.766723382 | 7.422424723 |
| 0.014691447 | 0.014147667 | 0.008087423 | 1.050326039 | 0.015291245 |
| 2.107662574 | 3.117380904 | 0.013141492 | 1.082045402 | 4.213562759 |
| 0           | 0           | 0           | 2.502117259 | 0           |

|             |             |             |             |             |
|-------------|-------------|-------------|-------------|-------------|
| 0.276811957 | 0.260646601 | 1.617955503 | 1.807750135 | 0.295586031 |
| 0           | 0           | 2.289224939 | 2.447721412 | 0           |
| 0           | 0           | 1.385866308 | 2.054335362 | 0           |
| 0           | 0           | 0.915703248 | 2.701080999 | 0           |
| 0.028491765 | 0.027404307 | 1.678512596 | 3.306021546 | 1.095544588 |
| 0.103490268 | 0.098897183 | 1.273147568 | 2.416267699 | 2.768589747 |
| 1.478218611 | 0.625190198 | 1.558082698 | 2.230221462 | 1.482076774 |
| 0.424369053 | 0           | 1.260592448 | 0.837713713 | 0           |
| 0.005829334 | 0.005617902 | 0.003239196 | 1.60915567  | 0.006062167 |
| 0.051055545 | 0.049010914 | 0.027075995 | 3.940688659 | 0.053326191 |
| 0.068423805 | 0.065585032 | 0.035668242 | 2.617095284 | 0.071586793 |
| 7.872730047 | 7.628020508 | 0.021665548 | 0.037032041 | 8.592901224 |
| 0.090669427 | 0.086741065 | 0.046260695 | 1.931809212 | 0.095065156 |
| 0.009211745 | 0.008875017 | 1.616116367 | 1.623060729 | 1.031257884 |
| 0.027428218 | 0.026383789 | 1.078937378 | 1.696334523 | 0.028582966 |
| 0.079067085 | 0.075717127 | 1.21436299  | 2.658984537 | 0.082807245 |
| 0           | 0           | 0.72411697  | 2.977438032 | 0.699320923 |
| 0.045647051 | 0.043839546 | 0.024339657 | 2.524077373 | 3.025670462 |
| 0           | 0           | 0.66799194  | 2.873946485 | 0           |
| 1.555589882 | 0           | 0.709273943 | 3.481189658 | 1.18634666  |
| 0.067017793 | 0.064245157 | 0.034983465 | 0.06110345  | 0.070106262 |
| 4.959079359 | 4.374688238 | 0           | 2.548685744 | 7.104464087 |
| 1.747497634 | 1.135074599 | 0.021426213 | 1.74520324  | 2.17518096  |
| 1.141182955 | 0.040235144 | 0.022416407 | 2.179678194 | 0.043704298 |
| 0.159538509 | 0.151726679 | 0.076440235 | 0.143031466 | 0.168398289 |
| 0.020030295 | 0.019279956 | 0.010964869 | 1.666899085 | 0.02085875  |
| 0           | 0           | 1.526325609 | 3.614010861 | 0           |
| 0           | 0           | 0.604286219 | 2.314263053 | 0           |
| 3.813451815 | 3.706414061 | 0.000645139 | 1.589780243 | 5.983692049 |
| 0.310049309 | 0.291125362 | 0.131559896 | 3.668302946 | 0.332179004 |
| 1.633726066 | 0.194432034 | 2.122147913 | 0.182506753 | 0.217613039 |
| 0           | 0           | 0.777503409 | 4.689364184 | 0           |
| 0.016177668 | 0.015576865 | 1.639086164 | 3.40099902  | 0.016840546 |
| 0.119811454 | 0.114333471 | 0.05948704  | 3.835271383 | 0.125975924 |
| 0           | 0.676963459 | 0           | 2.814274002 | 1.184938838 |
| 0.019146743 | 0.018430917 | 1.055655083 | 0.017612393 | 0.019936962 |
| 0.060034225 | 0.057585266 | 0.031554344 | 4.982676941 | 0.062758525 |
| 0           | 0           | 0.676895363 | 1.138614574 | 0.650539219 |
| 0           | 0           | 0.863548908 | 2.771272973 | 0           |
| 0           | 0           | 0           | 1.82261248  | 0           |
| 0           | 0           | 0.85697139  | 2.095662271 | 0           |
| 2.030106313 | 0.33354258  | 0.146270091 | 1.99846929  | 0.383865263 |
| 4.69862952  | 5.842959958 | 0           | 2.443750823 | 6.479275487 |
| 0.095520975 | 0.091344228 | 1.2543069   | 1.309973238 | 0.100199019 |
| 0           | 0           | 2.534702964 | 3.739104862 | 0           |
| 0           | 0           | 1.525237329 | 2.934497447 | 0           |
| 0.082911521 | 0.079372349 | 0.042617468 | 3.170996877 | 1.269471195 |
| 1.867281662 | 1.865799992 | 0.037041279 | 1.862397584 | 2.303519701 |
| 2.342969136 | 3.136573303 | 0.097152563 | 2.772672037 | 3.442456557 |
| 10.43833927 | 8.100271637 | 0.054130231 | 0.097573629 | 9.90456647  |
| 0           | 0           | 1.390803798 | 0.813592196 | 0           |
| 0.467816274 | 0           | 1.869631225 | 2.882162891 | 0.474442536 |
| 0.116188654 | 0.110910825 | 1.30251732  | 1.372133614 | 1.370971961 |
| 0.22497438  | 0.212768621 | 0.102000013 | 3.857794727 | 0.239000413 |
| 0.111107621 | 0.106077213 | 1.290787282 | 3.64850101  | 0.116692101 |
| 0.106471508 | 0.101720018 | 0.053520326 | 1.343106254 | 0.111804574 |
| 0           | 0           | 0.513683062 | 1.531381633 | 0           |
| 0.128897301 | 0.122907995 | 0.063469579 | 1.409581341 | 2.523035115 |

| hsa-miR-512-5p | hsa-miR-520d-3p | hsa-miR-760 | hsa-miR-518f-3p | hsa-miR-498-5p |
|----------------|-----------------|-------------|-----------------|----------------|
| 0.130174374    | 0.131696629     | 0.102826384 | 0.127465985     | 0.129668329    |
| 0.0074563      | 0.007523536     | 0.006182374 | 0.007335753     | 0.007433867    |
| 0              | 0               | 1.962711387 | 0               | 0              |
| 0              | 2.380062541     | 2.612588286 | 0.859537673     | 0.85977534     |
| 0.017129322    | 0.017287389     | 1.653020207 | 0.01684609      | 0.017076597    |
| 0.036108876    | 0.036457005     | 0.029594167 | 0.035485805     | 0.035992818    |
| 2.476350873    | 0.259170569     | 1.719162221 | 0.248968127     | 1.773388904    |
| 0              | 0.566764289     | 2.329562968 | 0               | 0              |
| 0              | 0               | 0.76645632  | 0               | 0              |
| 0              | 0               | 3.764189252 | 0.730985974     | 0.731501048    |
| 0.129961415    | 0.131480574     | 0.102666526 | 0.127258497     | 0.129456395    |
| 0.109645104    | 0.110878083     | 0.087296334 | 0.10744851      | 0.109234964    |
| 0              | 0               | 0           | 0               | 0              |
| 0.075913163    | 1.251452754     | 2.299335293 | 1.251957068     | 1.251816684    |
| 0              | 0               | 1.959904907 | 0               | 0              |
| 2.704254407    | 0.088342082     | 0.070191089 | 2.973968676     | 2.367832625    |
| 2.981240115    | 3.320106797     | 2.3771049   | 3.90048439      | 1.89126799     |
| 0              | 0               | 1.33407976  | 0               | 0              |
| 0.147172186    | 0.148947951     | 1.446453953 | 0.144016207     | 0.146582175    |
| 0              | 0               | 2.535817879 | 0               | 0              |
| 0.462641602    | 0.471453953     | 0.324976332 | 0.447309523     | 0.459743616    |
| 0.12907999     | 0.130586358     | 2.040677033 | 0.12639968      | 0.12857921     |
| 0              | 1.44433093      | 0           | 0               | 0              |
| 0.225489307    | 0.22859752      | 0.171889777 | 0.21999345      | 0.224459123    |
| 0              | 0               | 0.864231951 | 0               | 0              |
| 0.448421868    | 0.449459247     | 1.217992171 | 0               | 0              |
| 0.011075814    | 0.011176561     | 2.047339235 | 0.010895225     | 0.011042203    |
| 0.208432298    | 0.211227239     | 0.15988257  | 0.203484796     | 0.207505443    |
| 0.056352346    | 0.056920501     | 2.227444095 | 0.055336755     | 0.056163051    |
| 0              | 0               | 1.328892808 | 0               | 0              |
| 0.134910062    | 0.136501671     | 1.412932194 | 0.13207914      | 0.134381038    |
| 6.158662665    | 7.002867857     | 2.737722682 | 7.06202161      | 6.975536673    |
| 9.684667559    | 9.462088121     | 1.829892285 | 8.888607274     | 9.38540604     |
| 2.649055196    | 2.485240434     | 0           | 3.166040227     | 2.796080076    |
| 0              | 0               | 2.231457472 | 0               | 0              |
| 0              | 0.735269391     | 1.955507064 | 0               | 0              |
| 0.109117665    | 0.110343456     | 1.340441648 | 0.106933804     | 0.10870991     |
| 1.061862865    | 0.01819032      | 1.060392435 | 0.017725018     | 0.017968056    |
| 0.049453223    | 0.049944384     | 0.040314956 | 0.048574884     | 0.049289546    |
| 0.026688219    | 0.026940048     | 0.021956347 | 0.026237243     | 0.026604242    |
| 0              | 0               | 1.40659544  | 0               | 0              |
| 0.007437194    | 0.007504255     | 1.614845748 | 0.00731696      | 0.007414819    |
| 4.529319251    | 4.952284312     | 0.109047464 | 5.47978386      | 4.622253521    |
| 0.198457873    | 0.201075586     | 0.152792116 | 0.193821055     | 0.197589516    |
| 5.373469556    | 5.490162245     | 0.128781953 | 4.412508108     | 5.371776531    |
| 0              | 0               | 3.202534687 | 0               | 0              |
| 0.288234868    | 0.292606625     | 0.214825461 | 0.280537116     | 0.286788818    |
| 0.117279281    | 0.118617674     | 2.003821083 | 0.11489605      | 0.11683418     |
| 7.340141443    | 7.075717119     | 1.405808054 | 7.115231549     | 6.974796308    |
| 0.227368363    | 0.230511874     | 0.173203536 | 0.221810781     | 0.226326542    |
| 0.104031821    | 1.988008886     | 1.325819102 | 1.986751158     | 1.339689254    |
| 0              | 0               | 0.747648353 | 0               | 0              |
| 0              | 0               | 2.740979068 | 0               | 0              |
| 0.171042758    | 0.173195984     | 0.133035157 | 0.167221856     | 0.170327866    |
| 0.032259471    | 0.032567783     | 0.026480239 | 1.717344758     | 0.032156676    |
| 0              | 0               | 1.320457498 | 0               | 0              |



|             |             |             |             |             |
|-------------|-------------|-------------|-------------|-------------|
| 0.114299734 | 0.115596682 | 0.090838849 | 0.111989865 | 0.113868378 |
| 0           | 0           | 3.513046339 | 0           | 0           |
| 0.006997361 | 0.007060388 | 0.005802933 | 0.006884355 | 0.006976331 |
| 0.018302131 | 1.661074429 | 2.402005627 | 0.017998691 | 0.018245642 |
| 0           | 0           | 2.943364963 | 0           | 0           |
| 9.788269811 | 10.15872338 | 0.073357424 | 9.165154258 | 10.15601702 |
| 2.842149601 | 3.035352199 | 2.352928504 | 1.614253592 | 3.943507631 |
| 0           | 0           | 1.12780694  | 0.630306803 | 0           |
| 0           | 0           | 0.750803183 | 0           | 0           |
| 0.000391662 | 0.000395133 | 0.000325685 | 0.000385435 | 0.000390503 |
| 0.167922002 | 0.170024455 | 0.130760746 | 0.16419044  | 0.167223899 |
| 0           | 0           | 0.905915459 | 0           | 0.904404447 |
| 0.219138482 | 0.222128549 | 0.167436389 | 0.213849308 | 0.218147256 |
| 0           | 0           | 0.86392272  | 0           | 0           |
| 3.704181622 | 3.482297094 | 1.506362248 | 4.355456507 | 2.489090879 |
| 0.041900971 | 0.04231023  | 3.771842586 | 0.041168756 | 0.041764558 |
| 0.045412554 | 0.045859585 | 2.513468296 | 0.044612931 | 0.045263565 |
| 0.248993534 | 0.252554558 | 1.703906677 | 0.242706835 | 0.247814157 |
| 0           | 0           | 0           | 0           | 0           |
| 0           | 0           | 0.816334668 | 0           | 0           |
| 1.731581704 | 3.175155518 | 3.968997415 | 2.978868001 | 1.731566931 |
| 0.186117534 | 0.188522064 | 1.54914842  | 0.181854887 | 0.185319584 |
| 0           | 0           | 1.171343796 | 0           | 0           |
| 0.053864337 | 0.054404487 | 2.546625253 | 0.052898657 | 0.053684359 |
| 0.165644493 | 1.523275326 | 0.129097569 | 0.161977673 | 0.164958554 |
| 0           | 0           | 1.976860103 | 0           | 0           |
| 0           | 0           | 2.452547038 | 0           | 0           |
| 0.020871423 | 1.071402987 | 2.088070343 | 0.020523349 | 0.02080662  |
| 0           | 0           | 2.733092467 | 0           | 0           |
| 0           | 0           | 1.742928764 | 0           | 0           |
| 0.119720077 | 0.121092712 | 0.094948263 | 0.117276254 | 0.119263623 |
| 0           | 0           | 1.834949702 | 0           | 0           |
| 0.324091485 | 0.329264163 | 1.873223956 | 0.3150055   | 0.322382516 |
| 0.000426194 | 0.000429972 | 2.001847696 | 0.000419418 | 0.000424933 |
| 0.255834749 | 0.259532179 | 0.192892068 | 0.249310209 | 0.254610465 |
| 0.194065301 | 0.19660636  | 0.149653227 | 1.604143768 | 0.193222254 |
| 0           | 0           | 0           | 0           | 0           |
| 4.830349882 | 4.883240246 | 1.047978394 | 5.204260082 | 3.658428621 |
| 0.704662217 | 0           | 2.731053079 | 0.70392293  | 0.70450068  |
| 0           | 0           | 3.234417684 | 0           | 0           |
| 0           | 0           | 0           | 0           | 0           |
| 5.009655684 | 3.8762933   | 1.280692806 | 4.587950234 | 3.734275325 |
| 0           | 0           | 0           | 0           | 0           |
| 0.020835218 | 1.071280704 | 2.412768844 | 0.020487776 | 0.020770532 |
| 0           | 0           | 2.513306758 | 0           | 0           |
| 0           | 0           | 1.373992024 | 0           | 0           |
| 0           | 0           | 1.986094238 | 0           | 0           |
| 0.741412001 | 3.16721416  | 0.743403975 | 0.740780154 | 1.644981385 |
| 0.504132776 | 0.505077699 | 3.497789651 | 0.502806376 | 0           |
| 0           | 0.398070553 | 1.403042688 | 0           | 0           |
| 0.01154135  | 0.011646448 | 4.912421496 | 0.011352965 | 0.011506287 |
| 0           | 0           | 2.417147591 | 0.523766402 | 0           |
| 0           | 0           | 0.881896426 | 0           | 0           |
| 0           | 0           | 4.087470168 | 0           | 0           |
| 2.607733374 | 5.147053268 | 3.267288904 | 5.154354805 | 3.989062095 |
| 0.014647952 | 0.01478233  | 1.049217018 | 1.050464169 | 0.014603125 |
| 1.684423118 | 4.447086448 | 1.080143886 | 3.580255979 | 2.434185501 |
| 0           | 0           | 0.795744128 | 0           | 0           |

|             |             |             |             |             |
|-------------|-------------|-------------|-------------|-------------|
| 0.27549     | 0.279590922 | 0.206257008 | 0.268262953 | 0.274132974 |
| 0           | 0           | 2.133636226 | 0           | 0           |
| 0           | 0           | 1.355902151 | 0           | 0           |
| 0.849077914 | 0           | 1.463497782 | 0           | 0           |
| 1.096873328 | 1.096730726 | 1.696377965 | 0.027922853 | 0.028314957 |
| 1.336814131 | 1.336482865 | 0.082309037 | 0.101079644 | 0.102739261 |
| 0.626842506 | 0.627557589 | 2.60031671  | 1.770195589 | 1.113305825 |
| 0.424040162 | 0           | 0.422362215 | 0           | 0           |
| 0.005812435 | 0.005864639 | 1.019672104 | 0.005718827 | 0.005795015 |
| 0.050891514 | 0.051398555 | 2.206775036 | 0.049984858 | 0.050722553 |
| 0.068195738 | 0.06890091  | 2.271362193 | 0.066936156 | 0.067960874 |
| 8.161096698 | 7.852194964 | 0.032966086 | 7.562033734 | 7.315066199 |
| 0.090353238 | 0.091331209 | 1.916513993 | 0.088608815 | 0.090027734 |
| 1.031699584 | 0.009267991 | 2.362632614 | 0.009035726 | 0.009157074 |
| 0.02734459  | 0.027603003 | 1.692348419 | 0.026881842 | 0.027258419 |
| 0.078797712 | 0.079630736 | 0.063495095 | 0.077310751 | 0.078520355 |
| 0           | 0           | 1.592781938 | 0           | 0.694873162 |
| 0.045502109 | 0.04595011  | 3.786821523 | 0.044700755 | 0.045352797 |
| 0           | 0           | 3.13588222  | 0           | 0           |
| 0           | 1.182602323 | 1.570388128 | 0.678615756 | 0           |
| 0.066795065 | 0.067483713 | 0.054078541 | 0.065564891 | 0.066565695 |
| 4.489230657 | 5.996401893 | 3.704575892 | 5.903842333 | 5.484983239 |
| 1.134892664 | 0.04021406  | 1.131117685 | 0.03913402  | 1.134940463 |
| 0.041748479 | 0.042156109 | 1.137232964 | 0.041019169 | 0.041612607 |
| 0.158906087 | 0.160864265 | 0.124160252 | 0.155428558 | 0.158255706 |
| 0.019970252 | 0.020155769 | 0.016474212 | 0.019637889 | 0.019908375 |
| 0           | 0           | 4.239917392 | 0           | 0           |
| 0           | 0           | 1.701682961 | 0           | 0           |
| 3.175854287 | 3.913021195 | 2.004989053 | 4.761037522 | 3.912989531 |
| 0.308497278 | 0.313314559 | 2.517720173 | 0.300026625 | 0.306904914 |
| 0.204362753 | 0.207084854 | 0.156995885 | 0.199542899 | 0.203459936 |
| 0           | 0           | 4.326319536 | 0           | 0           |
| 0.016129606 | 0.016278096 | 0.013326674 | 0.015863516 | 0.016080073 |
| 0.11936946  | 0.12073716  | 2.781736476 | 0.116934369 | 0.118914643 |
| 0           | 0.678945268 | 1.568808323 | 0.677515567 | 0.678155244 |
| 0.019089465 | 0.019266434 | 2.670007748 | 0.0187724   | 0.019030438 |
| 0.059837612 | 0.060445453 | 1.811684388 | 0.058751318 | 0.059635115 |
| 0           | 0           | 1.820392731 | 0           | 0           |
| 0           | 0           | 4.023187504 | 0           | 0           |
| 0           | 0           | 1.537480012 | 0           | 0           |
| 0           | 0           | 2.581029168 | 0           | 0           |
| 0.35471695  | 0.360619374 | 0.258325734 | 0.34437073  | 0.352768853 |
| 4.698863505 | 5.988472452 | 2.189900008 | 6.455816835 | 5.948418517 |
| 0.095184658 | 0.096224964 | 1.932522333 | 0.093329616 | 0.094838457 |
| 0           | 0           | 2.937160831 | 0           | 0           |
| 0           | 0           | 2.705758311 | 0           | 0           |
| 0.082626842 | 1.272663817 | 0.066480637 | 0.081055678 | 0.082333741 |
| 0.071015653 | 2.909264554 | 0.05739987  | 0.069696419 | 0.070769643 |
| 1.652500166 | 1.652439578 | 2.27622164  | 3.144594042 | 0.210158751 |
| 9.018558763 | 9.592638572 | 0.085607187 | 8.48312186  | 8.989340985 |
| 0           | 0           | 1.758454868 | 0           | 0           |
| 0           | 0           | 1.764005385 | 0           | 0.467208966 |
| 0.11576294  | 0.117080192 | 1.359382027 | 0.113417127 | 1.375580858 |
| 0.223980691 | 0.227060676 | 3.594469975 | 0.2185342   | 0.222959813 |
| 0.110673159 | 0.111920185 | 1.344891861 | 0.108451686 | 0.11025836  |
| 0.106088561 | 0.107273303 | 1.331745887 | 0.103977425 | 0.105694424 |
| 0           | 0           | 1.990145711 | 0           | 0           |
| 0.128413681 | 2.073491111 | 0.101503944 | 0.125750423 | 0.127916097 |

| hsa-miR-431-3p | hsa-miR-137-3p | hsa-miR-2114-3p | hsa-miR-1292-5p | hsa-miR-615-3p |
|----------------|----------------|-----------------|-----------------|----------------|
| 5.571647159    | 1.414398882    | 0.115621393     | 1.392227101     | 0.104184439    |
| 4.499852245    | 1.615921164    | 1.025697784     | 2.617959462     | 0.006248714    |
| 6.294756616    | 1.347851       | 0.770355098     | 1.10623429      | 0              |
| 4.577126408    | 0.85952973     | 0               | 1.822742766     | 0              |
| 3.897191297    | 0.015756814    | 0.01557666      | 3.398717287     | 4.604135218    |
| 4.435530377    | 0.033098175    | 1.121957851     | 0.028161186     | 0.029929662    |
| 3.826641684    | 0.225054048    | 5.347173267     | 0.180219197     | 0.195625148    |
| 5.773338693    | 0              | 0.563311279     | 1.046016886     | 0.565864538    |
| 0.769371505    | 0              | 0               | 1.302943388     | 0              |
| 5.343925502    | 1.250789727    | 0               | 2.616151355     | 2.202610281    |
| 4.053310041    | 1.413775367    | 1.412508626     | 0.096934553     | 1.400896261    |
| 6.665860973    | 0.099149303    | 1.352557686     | 0.082556252     | 0.088414931    |
| 4.564228242    | 0              | 0.950327818     | 0.951739577     | 0              |
| 4.37382245     | 3.803761044    | 0.068185982     | 0.058075901     | 0.061984178    |
| 3.535886784    | 0              | 0               | 1.960676017     | 0.96864054     |
| 4.330717349    | 0.079357918    | 3.186763068     | 1.272528585     | 0.071059941    |
| 4.13951856     | 0              | 1.596343268     | 1.227212264     | 0              |
| 2.026296269    | 7.24897075     | 1.720871077     | 1.33743928      | 0              |
| 9.8331343      | 0.132178835    | 1.462135816     | 2.855655221     | 0.117065618    |
| 6.027419307    | 0              | 1.951943595     | 0.964221977     | 0              |
| 3.043183773    | 0.393245491    | 0.384974746     | 0.300133985     | 0.331028697    |
| 5.366090043    | 0.116311       | 1.409938861     | 1.389264114     | 2.043106862    |
| 9.968676078    | 3.001242722    | 0               | 2.172977431     | 0              |
| 4.538782337    | 0.199692521    | 1.675700163     | 0.161136505     | 4.508343997    |
| 8.799119356    | 2.388588546    | 0               | 0.865625263     | 0              |
| 4.946252471    | 0              | 0.872291164     | 1.504633421     | 3.227800399    |
| 3.379112505    | 3.376526618    | 0.010084784     | 3.219875454     | 4.576179687    |
| 1.633458208    | 0.185148339    | 2.30590294      | 0.15006382      | 0.162222799    |
| 3.597752435    | 0.051459999    | 2.237330155     | 1.794973777     | 0.046351668    |
| 4.107768639    | 0.787297766    | 0               | 0.792020515     | 2.505198449    |
| 4.877048383    | 0.121435622    | 5.894731852     | 0.100396479     | 0.107789029    |
| 2.751336609    | 1.118774405    | 0.031776316     | 1.114269628     | 0.029085273    |
| 1.212323187    | 0.059263218    | 0.058517763     | 1.824857148     | 0.053291929    |
| 4.823892184    | 0.673108278    | 4.055522113     | 0.678815957     | 6.662583816    |
| 4.222031292    | 0              | 2.219257383     | 1.28439876      | 0              |
| 6.997410009    | 1.254811286    | 0               | 2.621020471     | 0              |
| 2.449276106    | 0.098681864    | 2.770363989     | 1.33431679      | 0.088006672    |
| 5.652629508    | 1.658995028    | 0.016386822     | 1.655212593     | 0.015043159    |
| 3.948740664    | 3.033538539    | 2.209862162     | 1.159145003     | 1.775284052    |
| 4.462510827    | 6.131924329    | 2.932373245     | 2.109394952     | 5.795968133    |
| 3.225597858    | 0              | 0.8506131       | 1.409164355     | 0              |
| 3.739760664    | 0.00685371     | 0.006776964     | 2.031295871     | 0.006232748    |
| 2.901905151    | 0.124575922    | 2.091887852     | 1.414574534     | 0.110504816    |
| 4.313354402    | 0.176602516    | 0.173844499     | 2.224496758     | 0.155001619    |
| 4.649351695    | 0.147898683    | 0.145697856     | 0.12126078      | 0.130566979    |
| 3.673046691    | 0              | 0               | 1.485472151     | 0              |
| 3.932017482    | 0.252449971    | 3.602343203     | 0.200519997     | 0.218260488    |
| 4.001900642    | 0.105905004    | 0.104444014     | 0.087990664     | 0.094306559    |
| 4.278504794    | 0              | 3.473906846     | 1.810104295     | 0              |
| 4.114323514    | 0.2012894      | 0.198019063     | 0.162346431     | 0.175795938    |
| 5.08894054     | 0.094169958    | 0.092899577     | 1.320038484     | 0.084061944    |
| 6.019645269    | 0              | 0.744761263     | 1.669403228     | 0              |
| 5.796241473    | 0.546101283    | 1.010340552     | 0.551882544     | 1.016883425    |
| 7.197571058    | 0.152957017    | 0.150661019     | 2.150570148     | 0.134893319    |
| 3.973375361    | 0.029590934    | 4.243354116     | 0.025206588     | 0.026778305    |
| 4.095941876    | 0              | 0.780666834     | 0               | 0              |

|             |             |             |             |             |
|-------------|-------------|-------------|-------------|-------------|
| 3.989655063 | 0.10327055  | 3.060559421 | 1.348747076 | 0.092011007 |
| 4.264069015 | 0           | 1.787815216 | 1.135668251 | 2.891694418 |
| 6.188579135 | 0.006448916 | 1.024123999 | 2.029463056 | 0.005865144 |
| 4.003095921 | 0.016831957 | 2.08048029  | 2.075873891 | 0.015273952 |
| 4.315800939 | 0           | 0           | 0.534821248 | 3.749749962 |
| 9.899946147 | 0.083007981 | 1.297672735 | 2.944661799 | 0.074271395 |
| 3.621658558 | 6.123000637 | 0.006354749 | 1.612509757 | 0.005844912 |
| 10.13174199 | 4.630945815 | 0           | 1.132659652 | 0           |
| 6.519163722 | 0           | 1.96541327  | 1.982146304 | 0           |
| 6.192019172 | 0.000361412 | 3.702411426 | 2.586714871 | 1.001334989 |
| 4.058963382 | 0.150250656 | 0.148005738 | 0.123098744 | 0.132579688 |
| 5.543161756 | 0           | 0           | 1.473424284 | 0           |
| 5.95897322  | 0.194287547 | 1.659080778 | 0.157032772 | 0.169918565 |
| 4.727143372 | 0           | 0.861924777 | 1.825683447 | 1.41984651  |
| 5.383231789 | 0.933331766 | 0.933410713 | 0.935253451 | 0.934356912 |
| 3.669399113 | 2.508612302 | 1.140954162 | 2.985388015 | 4.890045803 |
| 4.402701475 | 0.041554184 | 1.152397832 | 1.756335731 | 0.037508267 |
| 4.009134311 | 5.33794168  | 0.215921489 | 2.351855452 | 0.191083122 |
| 4.224506504 | 4.360698452 | 0           | 1.768371231 | 0           |
| 3.60669276  | 0           | 0           | 0.818089039 | 0           |
| 4.434012602 | 3.16830999  | 0.032429823 | 0.027926967 | 1.118610925 |
| 3.354132921 | 1.572913605 | 0.163440484 | 1.537298908 | 0.145998018 |
| 5.163848247 | 1.163602346 | 0.662923381 | 2.107771122 | 3.867832873 |
| 4.521839961 | 0.049210668 | 2.557365902 | 2.541108181 | 0.044346837 |
| 4.919088234 | 0.148273658 | 2.964917146 | 0.121553984 | 0.130887992 |
| 5.292244567 | 0           | 0           | 1.563718821 | 0           |
| 4.708546245 | 0           | 1.665235904 | 1.288161144 | 5.96479568  |
| 7.28402925  | 1.071368409 | 1.07124951  | 2.410844694 | 2.901769488 |
| 3.996324603 | 0.478782624 | 0.47879155  | 1.563325651 | 0.481070183 |
| 8.03335046  | 0           | 0.802265894 | 2.059084798 | 0           |
| 4.563115235 | 0.108060981 | 3.308256292 | 3.039237039 | 2.451954316 |
| 2.760302962 | 0           | 0           | 1.541388014 | 1.833291862 |
| 3.803457636 | 0.28208519  | 3.926885349 | 0.222127347 | 0.242482891 |
| 4.525898286 | 4.90908234  | 0.000388938 | 2.323799225 | 1.001452652 |
| 5.159353538 | 0.225352226 | 3.237689748 | 1.702336628 | 0.195872791 |
| 5.447724571 | 5.099781528 | 0.170147053 | 1.556947774 | 0.151805639 |
| 3.799048567 | 0           | 1.4316108   | 2.417238209 | 0.87585313  |
| 4.720853    | 0.013138169 | 1.643646234 | 0.011253549 | 0.011931583 |
| 9.267340675 | 0           | 1.596729981 | 2.889618261 | 1.909139442 |
| 7.483423152 | 0           | 0           | 1.723134503 | 0           |
| 5.460192233 | 0.855506032 | 0.855641281 | 0           | 0           |
| 2.709229558 | 0.080407526 | 0.079351641 | 0.067357248 | 1.281724649 |
| 2.955675552 | 0           | 6.697110243 | 0           | 0           |
| 7.253454562 | 0.019152494 | 1.670040637 | 1.068714836 | 0.017370999 |
| 6.704989252 | 0           | 0.671509598 | 1.869986088 | 3.197207862 |
| 6.656483971 | 0           | 0.823970976 | 2.089209818 | 0.825988071 |
| 9.136723483 | 1.571562476 | 0           | 3.307131067 | 0           |
| 5.140810929 | 0           | 0.740497074 | 0           | 6.082188857 |
| 3.562589391 | 0.500802305 | 1.294859667 | 1.840600048 | 4.165957602 |
| 5.888216307 | 0.799687552 | 0           | 1.141273178 | 0           |
| 4.817507304 | 4.643177373 | 0.010507628 | 2.048291147 | 0.009656908 |
| 2.520385848 | 3.001252307 | 2.537424066 | 1.346947171 | 3.536087878 |
| 8.267028122 | 0           | 0.880099821 | 0.883139891 | 0           |
| 12.36022249 | 0.887839684 | 0           | 2.436046606 | 0           |
| 3.981307792 | 0           | 1.518664518 | 2.086616031 | 0           |
| 4.247962252 | 0.013480524 | 0.013327208 | 2.061028658 | 4.927202037 |
| 7.912348751 | 4.366535107 | 0.021825112 | 1.677971587 | 0.020014715 |
| 3.908353199 | 2.031065625 | 0.793141531 | 2.302937724 | 0           |

|             |             |             |             |             |
|-------------|-------------|-------------|-------------|-------------|
| 6.198059676 | 0.241827356 | 2.948621838 | 0.192686317 | 0.209511852 |
| 5.431159446 | 0.991009464 | 0.991723557 | 1.684130851 | 0           |
| 4.328423281 | 0           | 1.350759412 | 0           | 0           |
| 3.785707793 | 2.047590398 | 0           | 1.473233989 | 0           |
| 4.471226466 | 0.02607375  | 2.940108941 | 1.694307779 | 2.119267835 |
| 3.943115834 | 0.093360311 | 1.332977465 | 1.950088891 | 0.083353297 |
| 3.272844667 | 1.113980436 | 0           | 2.260437909 | 0           |
| 7.126655041 | 0.419910392 | 1.166519594 | 1.89691239  | 0           |
| 5.91489176  | 0.005358054 | 1.020055896 | 2.024514232 | 0.004874182 |
| 6.552106365 | 7.112837776 | 0.045950705 | 1.163574479 | 0.041946415 |
| 12.13374843 | 0.062138954 | 0.061352644 | 3.086491881 | 1.220290151 |
| 3.788439332 | 0.036902554 | 0.036460043 | 1.130672427 | 0.033342674 |
| 7.613083619 | 4.729523984 | 1.2941923   | 0.068650381 | 0.073379192 |
| 3.633159669 | 1.031664129 | 2.628368444 | 1.030601212 | 0.007692149 |
| 4.391563529 | 0.025105613 | 2.711116325 | 2.111987086 | 0.022741216 |
| 5.482932642 | 0.0716591   | 0.07073447  | 1.871365131 | 0.064270201 |
| 4.992910501 | 0.69358306  | 0           | 1.215258947 | 3.531322983 |
| 3.929958255 | 0.041635438 | 0.041130988 | 2.181958044 | 0.037580957 |
| 5.259320042 | 0.634373483 | 0           | 1.514322803 | 0           |
| 3.546615536 | 0.677833469 | 0           | 0.683519083 | 0           |
| 4.420618354 | 0.060878425 | 5.26335411  | 2.26000258  | 0.054725661 |
| 2.537123793 | 1.093058214 | 0           | 2.419609981 | 0           |
| 3.366792196 | 0.036480914 | 1.134169083 | 1.736233468 | 0.032964683 |
| 4.120063385 | 0.038227433 | 1.140455967 | 2.494632582 | 0.03452996  |
| 9.521096797 | 0.142414897 | 0.140315781 | 2.116642545 | 0.125866814 |
| 6.82340323  | 0.018360353 | 1.068216553 | 0.015698988 | 0.016655385 |
| 4.229265028 | 0           | 0           | 3.380485302 | 0           |
| 3.419445469 | 0           | 0.56831966  | 1.955500869 | 0           |
| 4.465730182 | 0.001062794 | 0.001051056 | 1.003865079 | 0.000967717 |
| 3.109027859 | 0.26924184  | 0.26440524  | 2.48901409  | 0.232018464 |
| 3.856460355 | 0.181665315 | 0.178804718 | 2.239952462 | 0.159282598 |
| 5.18950565  | 0           | 1.277182816 | 1.677875581 | 2.233323603 |
| 4.545862388 | 1.055336245 | 1.055247296 | 2.067065698 | 0.013472145 |
| 3.106363315 | 0.107751396 | 0.106259772 | 1.362750658 | 0.095913948 |
| 3.843406878 | 0           | 0           | 1.193805926 | 0           |
| 3.557747165 | 0.017553462 | 0.017351933 | 3.254918248 | 0.015926193 |
| 2.861523425 | 0.054607444 | 5.565128448 | 1.807084966 | 3.42944102  |
| 3.781698573 | 0           | 0           | 1.527779444 | 0           |
| 4.831229251 | 0           | 0           | 2.376815681 | 0.847006479 |
| 4.788955667 | 0           | 0           | 0.660671715 | 0           |
| 3.548312128 | 0           | 1.386468376 | 1.393772833 | 0           |
| 4.341056377 | 0.307108651 | 0.301301329 | 2.587407765 | 0.262728373 |
| 4.74447327  | 0           | 1.463684058 | 1.468532088 | 4.763314219 |
| 3.009992773 | 1.309752945 | 1.308944477 | 1.294921982 | 0.077164725 |
| 5.210966839 | 0           | 1.939985905 | 2.263049297 | 6.001088007 |
| 5.45264626  | 0           | 0           | 1.464850257 | 0.60316365  |
| 3.385826898 | 0.075088397 | 1.270408517 | 1.884029012 | 0.067297262 |
| 5.569605946 | 2.627865549 | 1.861049043 | 2.274992134 | 0.058091618 |
| 4.607113762 | 2.317851788 | 0.184451152 | 1.598314504 | 0.164146782 |
| 10.26770131 | 3.462565027 | 0.095868214 | 2.998859908 | 0.086700468 |
| 5.544374277 | 7.415903691 | 0           | 2.741339827 | 0.815867551 |
| 4.093364895 | 0           | 0           | 1.256408056 | 0           |
| 2.024702877 | 0.104564643 | 4.588596062 | 1.352800231 | 0.093138936 |
| 5.049487325 | 0.198409686 | 0.19520068  | 1.628929043 | 3.372582086 |
| 7.387952873 | 1.356630409 | 0.098694985 | 3.009626251 | 0.089210237 |
| 3.053929285 | 0.095995602 | 0.094696034 | 1.9594258   | 0.085658977 |
| 6.459443974 | 3.094460571 | 0           | 2.182975927 | 1.783378012 |
| 2.06842743  | 0.115724627 | 0.114098705 | 2.02787571  | 0.10284114  |

| hsa-miR-1276 | hsa-miR-466 | hsa-miR-517-5p | hsa-miR-522-3p | hsa-miR-518c-5p |
|--------------|-------------|----------------|----------------|-----------------|
| 1.374054162  | 0.123265701 | 0.13711958     | 0.131085487    | 0.137941885     |
| 0.005292299  | 0.007146437 | 0.007760076    | 0.007496588    | 0.007795541     |
| 1.400317696  | 0           | 0              | 0              | 0               |
| 0            | 0           | 3.478149772    | 1.810917278    | 3.583984509     |
| 2.391390725  | 0.016401716 | 0.017844005    | 0.017224027    | 0.017927531     |
| 1.113215564  | 0.034510114 | 0.037685221    | 0.03631742     | 0.03786984      |
| 0.155336586  | 4.575883414 | 0.272498223    | 0.257686382    | 2.950983254     |
| 0.576975315  | 0           | 0              | 1.033198158    | 0               |
| 0            | 0.763402862 | 0              | 0              | 0.768058512     |
| 1.663298745  | 0.730450188 | 0              | 0              | 0               |
| 0.085115243  | 0.123066604 | 0.136892375    | 0.130870677    | 0.137712972     |
| 0.072731378  | 0.10403465  | 0.115261016    | 0.110383218    | 0.115924322     |
| 0            | 0           | 0              | 0              | 0               |
| 0.051458933  | 0.072267648 | 0.079536811    | 1.885585697    | 0.079963132     |
| 0.970063257  | 0           | 0              | 0              | 0               |
| 0.05880681   | 5.215533535 | 4.120771114    | 2.368426591    | 3.406762011     |
| 1.238364912  | 5.437679154 | 5.733216636    | 3.215878429    | 5.214533244     |
| 0.801366185  | 0           | 0              | 1.326919495    | 0.795411223     |
| 1.416648651  | 0.139130474 | 0.155285474    | 0.148234864    | 0.156248031     |
| 0.965343283  | 0           | 0              | 0              | 0.963690508     |
| 0.252394454  | 0.424363716 | 0.504063866    | 0.467898789    | 0.50918356      |
| 1.371268458  | 1.414630267 | 0.135952089    | 0.129981604    | 0.136765633     |
| 0            | 0           | 0              | 0              | 0.887485383     |
| 2.249461589  | 0.211555425 | 0.2397854      | 0.227347984    | 0.241497825     |
| 1.833538489  | 0           | 0              | 0              | 0               |
| 1.246200459  | 0           | 1.209843538    | 0              | 0.456150869     |
| 3.046767496  | 1.038256992 | 0.011531119    | 0.011136179    | 0.011584296     |
| 1.560445014  | 5.243386475 | 0.221268578    | 0.210103915    | 0.222802885     |
| 0.038693699  | 0.053749671 | 0.058929073    | 0.056692633    | 0.059231546     |
| 0            | 0           | 0              | 0              | 0               |
| 0.088085023  | 4.915964915 | 0.142174542    | 0.135862644    | 0.143035134     |
| 2.134856239  | 0.033526722 | 8.764287815    | 7.476833932    | 8.518390522     |
| 0.044378177  | 0.061946352 | 11.13077067    | 9.998255278    | 10.57397849     |
| 0            | 0           | 2.793710072    | 2.301709888    | 3.264115992     |
| 0            | 0           | 0              | 0              | 0               |
| 1.276071889  | 0           | 0              | 0              | 1.257316939     |
| 1.319500645  | 2.444648035 | 0.114700593    | 0.109851479    | 0.115359964     |
| 1.652111333  | 0.017256524 | 0.018777284    | 0.018123508    | 1.659301214     |
| 2.186320079  | 0.047201322 | 0.051679548    | 0.049747413    | 0.051940684     |
| 0.01869406   | 0.02553037  | 0.027827675    | 0.026839087    | 0.027960987     |
| 0.858231569  | 0           | 0              | 0              | 0               |
| 0.005278808  | 0.007128138 | 0.007740176    | 0.007477376    | 0.007775549     |
| 0.090221497  | 0.131032404 | 6.956589371    | 5.918969186    | 6.958792298     |
| 0.124695526  | 0.186681515 | 0.210469912    | 0.200023642    | 0.21190393      |
| 2.102321061  | 6.198583997 | 5.841352221    | 4.898700626    | 6.282111025     |
| 0            | 0           | 0              | 0              | 0               |
| 0.172085462  | 7.469998614 | 0.308453952    | 0.290847533    | 0.310895191     |
| 2.734798612  | 0.111195064 | 0.123379141    | 0.118080443    | 0.124100256     |
| 3.387043895  | 4.62084131  | 8.71184222     | 7.021127161    | 8.088122738     |
| 0.140475651  | 0.213279692 | 0.241829171    | 0.229248114    | 0.243561732     |
| 0.0692542    | 0.098762896 | 2.432447296    | 0.104724546    | 2.77195593      |
| 0            | 0           | 0              | 0              | 0               |
| 1.402686339  | 0           | 0              | 0              | 0               |
| 0.109238641  | 0.161321576 | 0.180900365    | 0.172331032    | 0.182073242     |
| 1.702924918  | 5.249772298 | 2.964457474    | 0.032444169    | 1.108099894     |
| 0            | 0           | 0              | 0              | 0               |

|             |             |             |             |             |
|-------------|-------------|-------------|-------------|-------------|
| 0.075596251 | 5.374894689 | 0.120209256 | 0.115076109 | 0.120907624 |
| 0.644795093 | 0           | 0           | 0           | 0.639101216 |
| 1.611420032 | 0.006706876 | 0.007282113 | 0.007035126 | 0.007315355 |
| 2.660171585 | 0.017522668 | 2.082277588 | 1.661085208 | 2.897879877 |
| 2.75661123  | 0           | 0           | 0           | 0           |
| 1.272224399 | 2.985740191 | 11.84550715 | 9.915196794 | 10.58025967 |
| 2.614152369 | 0.006683694 | 4.285490958 | 2.842197502 | 4.124889691 |
| 1.523637121 | 0           | 0           | 0.631671031 | 0           |
| 0           | 0           | 0           | 0           | 2.210581422 |
| 0.00027936  | 0.000375649 | 0.000407338 | 0.000393742 | 0.000409167 |
| 1.466995805 | 0.158426226 | 0.177544631 | 0.169179936 | 0.178689117 |
| 0           | 0           | 0           | 0           | 1.468708867 |
| 0.136036131 | 0.205723133 | 0.232883606 | 0.220926619 | 0.234528731 |
| 2.149535932 | 0           | 0           | 0           | 0           |
| 1.510673375 | 0           | 5.672895467 | 4.479647062 | 5.672684041 |
| 3.338719049 | 1.141866681 | 0.043754949 | 0.042146121 | 0.043972226 |
| 0.031410125 | 0.043361953 | 0.047438205 | 0.045680321 | 1.151004169 |
| 2.302510094 | 0.233078716 | 0.265405934 | 0.251122503 | 0.267377667 |
| 0.827079959 | 0.817920092 | 0           | 0           | 0.821451373 |
| 1.372444596 | 0           | 0           | 0           | 1.357247863 |
| 1.112290481 | 0.034219001 | 3.501502903 | 0.03600983  | 5.398522553 |
| 0.117799016 | 0.175282912 | 0.197139709 | 1.582209866 | 1.57543789  |
| 1.875375271 | 0           | 0           | 0           | 0           |
| 1.166021997 | 0.051389188 | 0.056313569 | 0.054187858 | 0.056600995 |
| 0.106136052 | 0.15631211  | 0.175096955 | 0.166880445 | 1.517072361 |
| 2.29966452  | 0           | 0           | 0           | 0           |
| 1.691418233 | 0           | 0           | 0           | 0           |
| 1.066423447 | 0.019977446 | 0.021750176 | 1.671571465 | 0.02185292  |
| 1.300104067 | 0           | 0           | 0           | 0           |
| 1.358650704 | 0           | 0           | 0           | 0           |
| 0.078911559 | 0.113482137 | 0.125977253 | 0.120541718 | 0.126717179 |
| 1.861250519 | 0           | 1.522865845 | 0           | 0.660252067 |
| 0.189764047 | 4.174047611 | 0.348092127 | 0.327181703 | 0.351003465 |
| 0.000303984 | 0.000408768 | 0.000443254 | 0.000428458 | 0.000445244 |
| 1.662458441 | 1.767868949 | 0.272886076 | 0.258045121 | 0.274936342 |
| 0.122251979 | 0.182627271 | 2.753066675 | 1.604742879 | 2.28834167  |
| 0           | 0           | 1.831622416 | 0           | 0           |
| 1.045727472 | 0.013672463 | 6.692810861 | 5.285468    | 6.885705668 |
| 1.933982822 | 3.110597148 | 0           | 0           | 0           |
| 0.589922251 | 0           | 0           | 0.579266848 | 0           |
| 0           | 0           | 0           | 0           | 0           |
| 1.887063028 | 0.084218247 | 7.084917518 | 5.127141328 | 5.724748905 |
| 0           | 8.678714521 | 0           | 0           | 0           |
| 1.066310589 | 0.019942863 | 0.02171237  | 1.071328502 | 2.093276935 |
| 0.684098183 | 0           | 0           | 0           | 0           |
| 2.099766511 | 0           | 0           | 0           | 0           |
| 0           | 0.9888696   | 0           | 0           | 0           |
| 2.242121632 | 0           | 3.572295516 | 0.741689789 | 2.411797096 |
| 3.555379666 | 0           | 0           | 0           | 0.511282845 |
| 0.405597433 | 0           | 0           | 0           | 0           |
| 2.855757335 | 0.011057236 | 0.012016336 | 0.011604321 | 0.012071815 |
| 0           | 0           | 0           | 0           | 0.53194757  |
| 0           | 0           | 0           | 0           | 0           |
| 2.44355084  | 0           | 0           | 0           | 0           |
| 0           | 0.649447931 | 6.780189774 | 5.250754928 | 6.079899238 |
| 0.010345245 | 0.014029201 | 0.015255412 | 0.014728465 | 0.015326387 |
| 0.016866527 | 0.022998949 | 5.33810775  | 2.700449898 | 5.414408635 |
| 1.745620062 | 0           | 0           | 0           | 0           |

|             |             |             |             |             |
|-------------|-------------|-------------|-------------|-------------|
| 0.165638639 | 4.211737836 | 0.294434981 | 0.277941115 | 0.296718648 |
| 0           | 0.316122347 | 0           | 0           | 0           |
| 1.366978609 | 0.808960969 | 0           | 0           | 0           |
| 0.874691227 | 0           | 1.181584455 | 0           | 1.183091226 |
| 1.689351028 | 0.027167747 | 0.029622391 | 0.028565889 | 2.946220945 |
| 1.303584307 | 2.759084085 | 0.108332164 | 1.98467661  | 0.108947291 |
| 2.786546826 | 1.478931994 | 1.481617452 | 0.627254193 | 2.014678306 |
| 0           | 0.420901961 | 1.171121189 | 0.840614918 | 0.848995254 |
| 1.60697505  | 0.005571796 | 0.006048269 | 0.005843716 | 1.019793167 |
| 2.191356991 | 0.048567221 | 0.05319008  | 0.051195212 | 0.053459734 |
| 1.207357884 | 0.064970171 | 0.071396881 | 0.068618043 | 0.071773161 |
| 1.730777351 | 0.038490808 | 9.45154623  | 7.873114449 | 9.105665518 |
| 0.060677173 | 0.08589228  | 0.094800667 | 0.090938796 | 0.095324779 |
| 2.359644056 | 1.623342089 | 2.041674493 | 0.009234655 | 1.031211744 |
| 2.695721035 | 0.026156564 | 0.028513898 | 0.027499402 | 0.028650712 |
| 1.237227938 | 0.074992391 | 0.082582452 | 0.079296536 | 0.083027873 |
| 1.613323137 | 2.1274747   | 0           | 0           | 0.699717728 |
| 2.172380545 | 1.153707679 | 4.231710659 | 1.769758209 | 2.52996957  |
| 0           | 0           | 1.495618818 | 0           | 0           |
| 1.897329762 | 0           | 1.558308962 | 0           | 2.100496035 |
| 1.203367105 | 7.15367829  | 0.069920849 | 0.06720748  | 0.070288212 |
| 2.258577845 | 0.609110327 | 5.549573939 | 4.89977283  | 5.43048858  |
| 1.729184386 | 0.038049484 | 0.041580629 | 0.040058801 | 2.77343626  |
| 2.158996136 | 0.039877768 | 0.043595059 | 0.041992654 | 1.139117088 |
| 1.445336237 | 0.150051659 | 0.16786159  | 0.160077798 | 0.168925569 |
| 0.014052711 | 0.019116582 | 0.020809232 | 0.0200814   | 0.020907316 |
| 1.931067631 | 0           | 0           | 0           | 0           |
| 2.542874487 | 0           | 0           | 0           | 0           |
| 1.589352745 | 0.001104736 | 6.692923695 | 4.591172313 | 5.621111652 |
| 0.182157039 | 0.287136126 | 0.330817417 | 0.311375623 | 0.333519406 |
| 0.127960951 | 0.192126168 | 0.21686013  | 0.205990869 | 0.218353176 |
| 1.6903507   | 0           | 0           | 0           | 0           |
| 1.051573659 | 0.015445996 | 2.072669731 | 0.016218573 | 0.01687939  |
| 1.346314887 | 0.113153669 | 0.125603961 | 0.12018815  | 0.126341175 |
| 0.689368276 | 0.6768071   | 0           | 1.554038529 | 1.185395189 |
| 2.075114749 | 0.018275043 | 2.085749305 | 0.019195493 | 1.064476372 |
| 1.183387105 | 2.856412052 | 0.062595083 | 0.060201656 | 0.062918902 |
| 0.656821838 | 0           | 0           | 0           | 0.650989356 |
| 0           | 0           | 0           | 0           | 0           |
| 3.095348601 | 0           | 0           | 0.657075311 | 0           |
| 1.80288041  | 0           | 0           | 0           | 0           |
| 0.204353292 | 0.328704211 | 0.382180282 | 0.358242047 | 0.38552513  |
| 0           | 0           | 7.995119211 | 4.884505556 | 6.668019021 |
| 0.063723658 | 0.090442257 | 0.099917412 | 0.095807512 | 0.100475462 |
| 1.533897399 | 0           | 0           | 0           | 0           |
| 0.613984974 | 0           | 0           | 0           | 0           |
| 0.055766057 | 0.078607002 | 2.349785049 | 0.083154021 | 0.087099207 |
| 1.215360591 | 0.067637922 | 0.074369746 | 0.071458025 | 3.509533164 |
| 0.131660633 | 0.198332123 | 2.809577292 | 1.652518387 | 2.80884946  |
| 0.071363079 | 0.101956431 | 7.790918678 | 8.440086207 | 12.82428588 |
| 0.822775144 | 0           | 0           | 0           | 0           |
| 0.477412938 | 0           | 0           | 0           | 0           |
| 1.336937537 | 2.468837379 | 0.1217657   | 0.116551458 | 0.122475209 |
| 0.138653188 | 0.21017063  | 0.238145102 | 0.225822515 | 0.239841435 |
| 1.323600763 | 0.104999529 | 0.116353528 | 0.111419675 | 0.117024529 |
| 1.939480953 | 0.10069517  | 0.111483196 | 0.106797821 | 0.112120102 |
| 1.824144324 | 0           | 0           | 0           | 0           |
| 1.369569786 | 0.121619369 | 2.523325757 | 0.129309526 | 2.865844937 |



| hsa-miR-20b-5p | hsa-miR-6514-5p | hsa-miR-548x-3p | hsa-miR-524-5p | hsa-miR-6844 |
|----------------|-----------------|-----------------|----------------|--------------|
| 5.315427984    | 2.427713002     | 0.083967173     | 0.117112956    | 0.079037805  |
| 7.03016627     | 2.029052942     | 0.005225368     | 0.006863824    | 0.004963785  |
| 4.105604966    | 1.649403515     | 0               | 0              | 1.140863894  |
| 3.943538266    | 1.83439818      | 0               | 0              | 0            |
| 4.735891644    | 1.647280716     | 0.011921928     | 0.015739323    | 0.011316045  |
| 5.097084372    | 1.110830975     | 0.024799179     | 0.033059948    | 0.02350292   |
| 4.870524755    | 1.641659257     | 0.152711977     | 1.755859104    | 2.28916635   |
| 4.174704713    | 1.43859912      | 0               | 0              | 0.582438443  |
| 5.325354149    | 0.777607465     | 0               | 0              | 0            |
| 4.896800423    | 0.745776053     | 2.637112487     | 0              | 2.456091575  |
| 5.19791399     | 0.079536795     | 0.083841228     | 0.116925947    | 0.078920369  |
| 6.393377921    | 0.068070583     | 0.071668272     | 0.099017927    | 0.067554631  |
| 5.896209912    | 0               | 0               | 0              | 0.954180425  |
| 5.469576835    | 0.048292305     | 0.050738207     | 0.068986378    | 1.223247411  |
| 4.03736104     | 0.970616273     | 0               | 0              | 2.284502098  |
| 4.675820634    | 1.254854802     | 0.057970695     | 2.357741739    | 0.054728772  |
| 4.774321548    | 1.244693897     | 3.58725399      | 2.147019471    | 0.719613245  |
| 8.72310723     | 0               | 0               | 0              | 0.80479319   |
| 5.14049679     | 0.089002928     | 0.093912124     | 0.131992536    | 0.088300722  |
| 6.77264918     | 0               | 0               | 0              | 0            |
| 4.828507278    | 0.23131876      | 0.247503903     | 0.392434799    | 0.229042462  |
| 6.747793567    | 1.361761427     | 0.08331959      | 0.116151777    | 2.423103014  |
| 5.764797437    | 2.183799412     | 0               | 0              | 0            |
| 6.025815997    | 0.12946203      | 0.137168627     | 0.19937687     | 0.12836515   |
| 4.168691125    | 0.871555873     | 0               | 0              | 0            |
| 3.919970072    | 0.463223046     | 0               | 0              | 0            |
| 6.210831889    | 2.042913129     | 0.007741912     | 1.038127267    | 3.952422029  |
| 6.597278775    | 0.12099395      | 0.128086965     | 0.18486248     | 0.11998336   |
| 4.67904215     | 1.779481853     | 0.038166127     | 0.051398124    | 1.168999131  |
| 6.431931064    | 2.315563438     | 2.309948562     | 0              | 0            |
| 6.131965683    | 0.082281377     | 0.08675918      | 0.121267794    | 1.374924351  |
| 6.942691815    | 3.308034594     | 1.712031157     | 5.563441381    | 1.709110759  |
| 6.794297507    | 1.193763915     | 0.043765744     | 7.560560822    | 0.04138606   |
| 6.205761421    | 0.690014666     | 0               | 1.851291954    | 0.690515846  |
| 5.125737125    | 1.299847244     | 0               | 0              | 0            |
| 4.076323826    | 1.281895035     | 0               | 0.733659528    | 1.282576371  |
| 4.983880494    | 0.067768562     | 0.07134802      | 0.098551226    | 0.067255205  |
| 6.307942863    | 0.011978969     | 0.012536441     | 0.016558273    | 1.056233837  |
| 5.650099101    | 1.14973717      | 0.033652121     | 0.045163982    | 1.149351309  |
| 6.603752725    | 0.0176189       | 0.018450178     | 0.024478229    | 0.017498927  |
| 4.753514189    | 0               | 3.389308151     | 0              | 0.860838368  |
| 4.432569181    | 0.004984093     | 0.00521205      | 0.006846261    | 0.004951141  |
| 5.349356507    | 1.384769535     | 0.088858071     | 3.903209964    | 0.083595766  |
| 6.721960301    | 2.166177234     | 0.122691876     | 0.17633367     | 0.114996684  |
| 5.711463575    | 0.098692538     | 2.8660402       | 3.66788528     | 2.084364906  |
| 3.86462648     | 1.491472062     | 0               | 0              | 1.491717747  |
| 7.773574858    | 0.159131006     | 0.16910152      | 0.25201746     | 0.157716962  |
| 4.879314383    | 0.072417182     | 0.076279439     | 0.105762844    | 0.071863589  |
| 5.656443622    | 1.418432858     | 2.805999441     | 6.034266009    | 0.860227985  |
| 5.98762444     | 0.130383897     | 0.138158176     | 0.200970414    | 0.129277509  |
| 4.585826883    | 1.298523075     | 0.068248792     | 0.094046381    | 1.922236289  |
| 4.095941404    | 0               | 0               | 0              | 0            |
| 5.76720167     | 2.355653646     | 0               | 0              | 1.046587999  |
| 6.209643488    | 1.461445888     | 0.107529846     | 0.152733342    | 1.459971178  |
| 4.628727836    | 2.121028476     | 1.101059574     | 0.029557026    | 0.021060194  |
| 6.824381217    | 1.735526354     | 0               | 0              | 0            |

|             |             |             |             |             |
|-------------|-------------|-------------|-------------|-------------|
| 3.989774266 | 1.324804236 | 1.331267188 | 0.103132623 | 0.070187373 |
| 4.005186999 | 1.155808854 | 0           | 0           | 0.649836517 |
| 4.037457414 | 2.027284327 | 0.004905352 | 0.006441913 | 0.004659968 |
| 5.186393985 | 1.057222401 | 1.058136859 | 0.016813226 | 0.012079643 |
| 6.642780186 | 1.388147301 | 1.016539635 | 0           | 0           |
| 4.768634926 | 1.887125278 | 0.060518401 | 8.751002557 | 1.264972947 |
| 12.29511858 | 2.027190989 | 1.611188706 | 3.204280165 | 1.022012299 |
| 7.625241436 | 2.088364249 | 3.555478894 | 0           | 0.647559236 |
| 9.110482426 | 0.762457954 | 0           | 0.747787144 | 0           |
| 6.956397206 | 1.001247915 | 0.000275869 | 0.000361025 | 0.000262215 |
| 5.153573571 | 1.454284689 | 0.105772002 | 0.150031972 | 0.099321475 |
| 8.551940069 | 2.689502647 | 0           | 0           | 0           |
| 6.354059581 | 0.126330271 | 0.133808239 | 0.19398309  | 0.125265527 |
| 5.792328978 | 2.82621669  | 0           | 0           | 2.635311749 |
| 6.020079032 | 1.51234629  | 2.240903848 | 3.224222172 | 0           |
| 4.741133405 | 3.333058288 | 0.028661757 | 0.038321143 | 3.484720375 |
| 5.939028403 | 0.029554104 | 0.030988564 | 0.041505282 | 0.029347389 |
| 6.062914531 | 1.628668635 | 0.14939475  | 0.219233138 | 0.139624899 |
| 4.50627052  | 0.829827477 | 0           | 0.818103868 | 0.830151889 |
| 6.884008264 | 1.376772107 | 2.756427254 | 0           | 0           |
| 3.990855821 | 0.023471433 | 3.952788399 | 1.729402197 | 1.109653046 |
| 5.477466954 | 0.109635315 | 0.115928473 | 0.165739384 | 0.108737439 |
| 4.73445102  | 1.579567091 | 0           | 0           | 0           |
| 3.06299705  | 0.034831733 | 0.036543139 | 0.049151782 | 0.034585272 |
| 5.456827271 | 2.087257313 | 0.104484924 | 0.148058597 | 0.098126804 |
| 4.555655103 | 0           | 0           | 0           | 0.9830603   |
| 5.640533191 | 0.766149135 | 0           | 0           | 0           |
| 5.971331032 | 2.079656901 | 3.256308846 | 0.019164179 | 1.064924228 |
| 7.879800693 | 0.497618346 | 0           | 0           | 0.498240315 |
| 5.060193635 | 1.762995111 | 0           | 0           | 2.915464391 |
| 5.745077622 | 1.338475232 | 0.077744253 | 0.107915331 | 1.337473763 |
| 7.33749489  | 1.183041183 | 0           | 0           | 1.87265811  |
| 5.194797143 | 0.175123209 | 2.451369045 | 0.281581037 | 0.173528913 |
| 7.377436784 | 0.000287204 | 0.000300185 | 0.000392853 | 0.000285327 |
| 6.582462141 | 0.144091629 | 0.152892564 | 0.224981454 | 1.64010324  |
| 6.45645459  | 1.513104309 | 2.940124579 | 0.172568008 | 0.112780194 |
| 4.118760508 | 0.882896793 | 0           | 0           | 0.883133081 |
| 7.546349187 | 0.009515283 | 0.00995542  | 4.241285474 | 1.04471435  |
| 5.958855503 | 1.245024453 | 1.628301855 | 0           | 4.183338857 |
| 2.752062744 | 0.594739459 | 0           | 0           | 0.595317095 |
| 4.890856163 | 2.146043528 | 0           | 0           | 0           |
| 5.483694722 | 0.055829604 | 0.05870432  | 4.205267366 | 0.055416703 |
| 5.237247368 | 0           | 0           | 0           | 0           |
| 4.503096503 | 1.064970034 | 0.014463291 | 1.071235667 | 1.064814068 |
| 4.887178276 | 2.151579264 | 1.200380297 | 0           | 0.688820617 |
| 6.940582864 | 0.83528116  | 0           | 0           | 0.835597057 |
| 5.026632067 | 0.989791162 | 0.989638207 | 0           | 0           |
| 5.801056904 | 0           | 3.231107548 | 1.263396416 | 0           |
| 8.74852197  | 0.98534301  | 5.716000739 | 0           | 0           |
| 5.292293877 | 1.893956934 | 0           | 0           | 1.691259501 |
| 7.394808819 | 1.03634151  | 0.008064645 | 0.010616041 | 1.627157955 |
| 7.932721642 | 1.377391098 | 0           | 0           | 0           |
| 5.659352044 | 0           | 0           | 0           | 0.888627658 |
| 7.689696863 | 1.461602645 | 2.1838654   | 0           | 4.106815945 |
| 3.650699653 | 0.66671901  | 0           | 4.280632261 | 0.667242066 |
| 7.481628882 | 1.638437334 | 0.010212849 | 0.01346564  | 0.009695801 |
| 3.708789896 | 1.074700482 | 0.016647401 | 1.081995836 | 1.074519636 |
| 5.457422594 | 0.805873016 | 0           | 0           | 1.752104633 |

|             |             |             |             |             |
|-------------|-------------|-------------|-------------|-------------|
| 7.090093915 | 0.153284142 | 0.162794642 | 0.241419478 | 0.151934397 |
| 7.18319186  | 0.3320076   | 0           | 0           | 0           |
| 8.110072754 | 0           | 0           | 0           | 0           |
| 5.031850519 | 0           | 0           | 0           | 1.514361042 |
| 5.675846674 | 1.087879578 | 0.019613198 | 0.02604411  | 1.087664409 |
| 5.790157586 | 1.920778195 | 0.067691099 | 0.093237991 | 1.919647188 |
| 5.115768796 | 0.642629398 | 0           | 1.481721761 | 1.148095659 |
| 7.32124985  | 0.438430651 | 0           | 0           | 1.220196034 |
| 6.354254043 | 0.003900239 | 1.018697003 | 0.005352251 | 1.018370919 |
| 6.939382872 | 2.185809071 | 0.034596679 | 0.046464971 | 3.51676546  |
| 5.203209992 | 2.242993506 | 1.8218635   | 0.062062527 | 2.242147891 |
| 6.167650189 | 1.123137357 | 0.027590976 | 6.239415343 | 0.026140182 |
| 4.688860378 | 0.056875965 | 0.059811199 | 0.081888333 | 2.639614956 |
| 7.345632438 | 2.03569144  | 1.029444422 | 1.031659796 | 0.006106071 |
| 4.84557207  | 1.084692779 | 0.018895243 | 0.025077137 | 1.084485976 |
| 7.342494835 | 2.276718754 | 0.052564495 | 0.071569207 | 0.049655787 |
| 6.811367342 | 1.233129233 | 0           | 0           | 0           |
| 4.32013098  | 1.138327482 | 3.180277139 | 1.152963413 | 0.029403243 |
| 3.546505149 | 0.652085513 | 0           | 0           | 0.652621241 |
| 6.106279741 | 0           | 0.691357766 | 0           | 2.568072739 |
| 5.896074561 | 1.198755663 | 0.04491891  | 0.060803746 | 0.042470836 |
| 3.498014432 | 2.625500962 | 1.1209727   | 4.928450151 | 0.627501796 |
| 5.01581204  | 0.026029169 | 0.027282141 | 1.745003807 | 1.725027745 |
| 4.972681763 | 0.027245194 | 0.028560459 | 0.038182775 | 1.127080443 |
| 5.373403584 | 1.433375113 | 0.100655881 | 0.142210457 | 1.432013138 |
| 5.78084854  | 1.062329082 | 0.013871317 | 0.018339849 | 0.013163305 |
| 5.605541701 | 1.932822025 | 0           | 0           | 0           |
| 5.240087842 | 0           | 0           | 0           | 0.587399414 |
| 5.937170482 | 1.003667269 | 2.326689437 | 3.005677535 | 1.589236536 |
| 5.043330523 | 0.168249164 | 0.178950426 | 0.268769262 | 0.166733128 |
| 6.691917554 | 0.118946543 | 0.125893413 | 0.181386434 | 0.117956528 |
| 5.274899662 | 0           | 0           | 0           | 3.83929147  |
| 8.685033971 | 0.01073598  | 0.011234081 | 0.014823539 | 0.01066403  |
| 5.091964234 | 1.337595086 | 0.077534115 | 0.107606249 | 2.396064951 |
| 5.603531112 | 1.212342388 | 3.453099748 | 0           | 0.694043642 |
| 6.596161757 | 1.059634917 | 0.013267774 | 0.017533895 | 0.012591473 |
| 3.286259026 | 0.038521724 | 0.040430465 | 1.820847145 | 1.789937117 |
| 3.398338071 | 0.661243705 | 0           | 0           | 0.661771598 |
| 6.858447018 | 0.855391341 | 0           | 0           | 0           |
| 6.410594601 | 0.672206759 | 0           | 0           | 0.672724851 |
| 3.907111308 | 0           | 0           | 0           | 0           |
| 6.099844852 | 0.188276377 | 0.200638883 | 0.306540675 | 0.186529112 |
| 4.791652458 | 0.907372096 | 0           | 4.241023477 | 0           |
| 6.581347361 | 1.275464919 | 0.062808629 | 0.086189714 | 0.059263293 |
| 5.807759557 | 2.267522532 | 0           | 0           | 2.267698289 |
| 5.391804688 | 0.618676125 | 0           | 0           | 0.61923775  |
| 7.766622307 | 0.052305407 | 0.054978064 | 0.07499354  | 0.051921358 |
| 6.005390337 | 0.045340002 | 0.04762136  | 0.064594781 | 0.045011895 |
| 4.716876108 | 0.122331118 | 0.129520045 | 0.187139654 | 0.121307029 |
| 7.156996687 | 0.066801539 | 0.070322758 | 6.814616992 | 1.306390898 |
| 6.673040237 | 1.376644617 | 0           | 0           | 0           |
| 5.878128531 | 2.373473888 | 0           | 0           | 0.483221076 |
| 4.124105839 | 1.328508306 | 0.075367126 | 0.104424641 | 0.071011414 |
| 5.049240121 | 0.128720338 | 0.136372609 | 0.198096705 | 0.127631093 |
| 6.844823156 | 1.315579794 | 0.072291867 | 0.099927336 | 0.068137612 |
| 5.765364448 | 1.303828205 | 0.069504583 | 0.09586918  | 0.065531236 |
| 6.228670744 | 1.596367233 | 0           | 0           | 0.952716474 |
| 5.191548586 | 0.078674573 | 1.367464194 | 2.061070724 | 1.989499172 |

| hsa-miR-653-5p | hsa-miR-1229-3p | hsa-miR-509-3p | hsa-miR-146b-5p | hsa-miR-518e-3p |
|----------------|-----------------|----------------|-----------------|-----------------|
| 5.570608923    | 0.106638263     | 2.078324132    | 11.36373814     | 0.134380755     |
| 6.01851197     | 0.006367735     | 1.025467224    | 11.190286       | 0.007641192     |
| 5.224042213    | 0.37243176      | 1.758262021    | 9.643161286     | 0               |
| 6.123368936    | 3.381096561     | 3.104043597    | 11.95524323     | 2.954346284     |
| 3.99709304     | 2.886043482     | 3.086151206    | 8.958823992     | 0.017564149     |
| 5.319915974    | 1.120208281     | 1.732048294    | 12.79909546     | 0.037067246     |
| 1.764511075    | 2.405605738     | 4.507027021    | 12.08725452     | 3.302900624     |
| 3.690396695    | 2.139786321     | 2.293512912    | 9.748881262     | 0               |
| 3.521002574    | 1.297140386     | 1.679209848    | 11.783906       | 0.765886167     |
| 6.662712987    | 2.41542095      | 0.734810188    | 12.65033591     | 0               |
| 4.181935494    | 2.050137407     | 1.41454162     | 12.73730427     | 0.134159205     |
| 4.325160211    | 0.090433767     | 0.114956827    | 12.9302175      | 0.113049299     |
| 4.009026395    | 0               | 2.252579561    | 14.18244122     | 0               |
| 8.16104624     | 1.24523742      | 2.659282417    | 12.46966144     | 1.250529527     |
| 4.703935102    | 4.202603423     | 3.535857415    | 15.6645544      | 0               |
| 3.406649035    | 0.072626059     | 2.368645404    | 10.98392047     | 3.734189299     |
| 5.130544869    | 0.704978614     | 2.350923342    | 11.03924432     | 4.197857221     |
| 10.77746238    | 3.0157441       | 3.128680775    | 13.12020647     | 0               |
| 2.589699707    | 0.119891362     | 2.136247622    | 12.37040346     | 0.152082508     |
| 5.069895231    | 0.963557048     | 0.963546154    | 12.64314304     | 0               |
| 4.64623538     | 3.323231531     | 0.501732827    | 12.25605344     | 0.487350197     |
| 5.899421913    | 2.047364265     | 5.466182804    | 11.41807928     | 0.133242285     |
| 3.145343009    | 0.88669128      | 2.418633179    | 12.6650016      | 0               |
| 4.40870213     | 1.656816539     | 5.132976317    | 10.28637861     | 0.234112373     |
| 3.947785441    | 1.821166802     | 1.416433747    | 10.12179824     | 0               |
| 4.623623463    | 2.10154072      | 1.209253127    | 12.47730387     | 0.451750876     |
| 3.642984298    | 3.753271697     | 2.374524518    | 12.13325986     | 0.011352895     |
| 4.348887739    | 0.166469219     | 4.046980984    | 13.26705821     | 0.216180639     |
| 5.460169958    | 1.801890435     | 4.283103993    | 13.34510776     | 0.057917664     |
| 5.034182263    | 2.859182193     | 1.323597824    | 10.43121272     | 0               |
| 5.680858219    | 0.110345427     | 5.386047573    | 12.46714725     | 0.13930894      |
| 1.727291599    | 2.740103448     | 3.49797303     | 12.53735415     | 8.250842969     |
| 2.278727808    | 1.211700278     | 2.613833857    | 9.495157663     | 10.7531591      |
| 4.718184218    | 1.860948802     | 6.221730896    | 11.82333796     | 3.7691655       |
| 3.586677168    | 2.798430083     | 1.961015146    | 10.41879444     | 0               |
| 5.862898185    | 1.64591204      | 3.646637636    | 13.04803118     | 1.254885589     |
| 3.671841272    | 1.344067272     | 2.451875331    | 10.563406       | 0.112501941     |
| 5.621431213    | 1.060849198     | 2.672425365    | 12.70206884     | 1.659801412     |
| 5.64980051     | 0.04162516      | 0.051559664    | 10.04179008     | 0.050806049     |
| 4.309908863    | 0.022640224     | 3.132704812    | 10.29670553     | 0.027381229     |
| 3.349259298    | 1.405103271     | 4.562387473    | 12.86212321     | 0               |
| 4.847945941    | 2.032333479     | 2.033826212    | 9.463736206     | 1.025548179     |
| 4.087390914    | 0.113139268     | 2.90407961     | 11.92135037     | 6.621782626     |
| 4.171109214    | 3.538575661     | 1.612623972    | 13.7480699      | 0.205711832     |
| 4.190647069    | 1.500885072     | 2.196408422    | 12.41991593     | 4.313329577     |
| 5.947030262    | 2.468219962     | 0              | 13.26860895     | 0               |
| 1.851175162    | 0.224518915     | 1.856429312    | 12.00779099     | 0.300396287     |
| 6.399859884    | 1.367648639     | 1.376512628    | 11.58569271     | 0.120975662     |
| 7.231900609    | 1.404310591     | 3.348164997    | 12.13451379     | 7.492849463     |
| 3.733752825    | 0.180504589     | 0.241036393    | 11.96164847     | 0.236090058     |
| 5.363526961    | 1.966652703     | 2.432637266    | 11.29636119     | 0.107225791     |
| 4.922820977    | 0.746498706     | 2.205035955    | 12.43669708     | 0               |
| 5.473473407    | 2.732574679     | 4.045959099    | 14.60310051     | 0               |
| 5.018234624    | 0.138258298     | 2.215574356    | 11.8613733      | 0.177002722     |
| 3.159255319    | 0.027313855     | 2.739033525    | 10.81598475     | 1.717264419     |
| 5.21387427     | 0.7822985       | 3.45221089     | 10.73374978     | 0               |

|             |             |             |             |             |
|-------------|-------------|-------------|-------------|-------------|
| 4.791562874 | 0.094127062 | 2.023071537 | 13.25416708 | 0.117881217 |
| 4.483591941 | 1.128122072 | 3.460536527 | 10.71480729 | 0           |
| 3.62181252  | 3.203069743 | 1.614194381 | 11.44120969 | 0.007170677 |
| 8.967568829 | 2.403128257 | 4.905478793 | 9.822127739 | 2.673750329 |
| 4.354727602 | 0.99223621  | 3.087070111 | 11.39109437 | 0           |
| 5.150067712 | 1.292192207 | 1.941583928 | 11.5608145  | 9.903949624 |
| 9.566304855 | 2.353349666 | 1.614093906 | 13.09289178 | 3.844264683 |
| 7.50123516  | 0           | 5.571889663 | 12.13339522 | 0           |
| 5.568043319 | 1.66563316  | 3.055406978 | 12.86825685 | 0.750369278 |
| 3.323980212 | 2.323709259 | 1.00134363  | 11.30199899 | 0.000401205 |
| 3.901956443 | 1.508160152 | 1.525765475 | 12.11959878 | 0.173740674 |
| 4.489186768 | 1.470672622 | 0           | 10.68187761 | 0           |
| 5.813269589 | 0.174425079 | 0.232130716 | 12.99808872 | 0.227431535 |
| 6.5107824   | 1.820750818 | 0           | 12.42443268 | 0           |
| 4.064142685 | 3.36496806  | 2.709115745 | 12.38356828 | 5.725233809 |
| 4.120835155 | 3.891136798 | 3.376818422 | 12.86728614 | 0.043027877 |
| 4.69378782  | 2.783046192 | 0.047329169 | 15.22451811 | 0.046643637 |
| 4.187709546 | 0.196331668 | 1.751823897 | 12.19427448 | 0.258882786 |
| 4.742061559 | 0.819717142 | 0           | 13.61972211 | 0           |
| 4.644784873 | 0.815385649 | 1.3565373   | 10.86193428 | 0           |
| 7.168560364 | 2.477121664 | 2.487501645 | 11.01652036 | 3.175854081 |
| 4.625723406 | 0.149713179 | 1.577786963 | 11.64703405 | 0.192777283 |
| 4.734672087 | 2.094357808 | 3.029476348 | 10.7431235  | 0           |
| 7.420844539 | 1.792853435 | 2.566486935 | 9.787660089 | 0.055352351 |
| 3.716974078 | 1.502046224 | 4.190647319 | 14.64595276 | 0.171360823 |
| 5.72510793  | 1.563146834 | 4.292868847 | 12.89715081 | 0           |
| 4.227420424 | 1.670959707 | 3.909567704 | 10.72164784 | 0           |
| 5.697923039 | 1.070306935 | 0.021702985 | 12.28418549 | 0.021405997 |
| 5.512693431 | 0           | 0.488068888 | 11.12416089 | 0           |
| 3.923916316 | 1.740433374 | 4.373051526 | 13.14624899 | 0           |
| 4.562865086 | 2.017640103 | 3.340455293 | 11.68432984 | 0.123511404 |
| 4.7859503   | 1.830437903 | 9.714553335 | 12.28752433 | 0           |
| 3.517183535 | 1.888149659 | 4.040819499 | 12.06535649 | 0.338503667 |
| 5.956576461 | 0.000364868 | 1.586753529 | 12.5648954  | 0.00043658  |
| 5.241992754 | 0.201294678 | 3.306975204 | 14.86699855 | 0.266105843 |
| 6.328466522 | 2.68730384  | 2.290014153 | 13.5796105  | 1.60321634  |
| 5.624542813 | 1.837127054 | 0           | 13.69362957 | 0           |
| 5.206848358 | 2.061518519 | 2.389478204 | 12.51600624 | 6.832250275 |
| 5.368562789 | 2.874352451 | 2.351364072 | 10.68274573 | 0           |
| 4.005423482 | 1.709444343 | 2.137611524 | 12.99803771 | 0           |
| 5.567146863 | 0.856914981 | 2.59162376  | 13.78241333 | 0           |
| 5.932624314 | 1.914923791 | 2.710921681 | 12.47239766 | 6.342309141 |
| 6.343772813 | 0.970495181 | 4.122942853 | 13.05760091 | 0           |
| 4.197304264 | 0.017710838 | 4.109369336 | 12.77067535 | 0.021368818 |
| 6.291819901 | 1.557561446 | 2.790601316 | 10.9333411  | 0           |
| 3.046902782 | 2.339125768 | 1.76278758  | 9.774299827 | 0           |
| 4.230468854 | 1.985929273 | 2.306525435 | 13.45438507 | 0           |
| 4.419257964 | 2.618782825 | 2.198393478 | 10.31431291 | 1.645628986 |
| 2.607010801 | 1.585580546 | 2.934875675 | 8.809068405 | 1.569979565 |
| 4.55492087  | 2.941617275 | 0.403340119 | 12.98687784 | 0           |
| 6.883877167 | 0.009842375 | 1.039320676 | 11.98916439 | 0.011830403 |
| 6.045045969 | 1.62081472  | 2.875418232 | 10.35281637 | 0           |
| 5.684171139 | 0           | 2.628919025 | 13.37848227 | 0           |
| 7.890295116 | 3.538550678 | 5.101995081 | 10.59753954 | 0           |
| 3.722967995 | 1.824433091 | 1.149088197 | 11.1529823  | 5.861177977 |
| 6.695150151 | 1.049583527 | 2.65631925  | 13.9432888  | 0.015017578 |
| 4.651162622 | 0.020408728 | 1.081268792 | 11.78278177 | 5.081524712 |
| 5.044274007 | 1.334025086 | 2.494761197 | 12.80284968 | 0           |

|             |             |             |             |             |
|-------------|-------------|-------------|-------------|-------------|
| 3.368774682 | 1.777503327 | 4.429905388 | 14.51410891 | 0.286891665 |
| 4.644930611 | 0.315406304 | 3.30856     | 11.31625715 | 0           |
| 5.609361278 | 0.810794343 | 3.157831384 | 10.70236345 | 0           |
| 5.49857054  | 2.496796214 | 1.671010021 | 13.80857611 | 0.852666046 |
| 5.766944745 | 1.697618792 | 4.793717864 | 12.20155604 | 0.029145237 |
| 5.996823051 | 1.326563999 | 2.429172759 | 12.97809789 | 2.429584116 |
| 5.089877084 | 2.593577642 | 1.481237752 | 12.1190936  | 2.401660647 |
| 2.026123534 | 1.676855445 | 2.315000876 | 13.66709619 | 0           |
| 4.353392253 | 1.019812597 | 3.199905702 | 13.70642662 | 1.019986943 |
| 3.246032379 | 5.873802472 | 5.936249085 | 13.28654437 | 0.052288157 |
| 8.885593882 | 2.605674031 | 1.855592832 | 15.49519798 | 0.070139456 |
| 4.91066984  | 1.13369976  | 2.177368928 | 12.3898268  | 9.417656838 |
| 4.134148838 | 1.920948049 | 2.38012744  | 11.85026385 | 0.093051271 |
| 5.09459175  | 1.622175786 | 3.633172487 | 13.53771998 | 1.623401726 |
| 4.845489255 | 3.448104378 | 1.092273674 | 12.2652277  | 0.028055738 |
| 3.838627726 | 2.314279606 | 3.838219331 | 12.90216136 | 0.081094804 |
| 5.350236705 | 0.695550885 | 3.196538737 | 13.37087811 | 0           |
| 4.48156727  | 1.762136029 | 2.799190378 | 10.32185761 | 1.152779824 |
| 5.235778367 | 1.131825147 | 0           | 10.36881736 | 0           |
| 6.162234416 | 2.831983929 | 1.853998714 | 12.09443763 | 2.309083864 |
| 5.293048979 | 1.217250532 | 7.407089625 | 13.39490548 | 0.068693132 |
| 4.311401164 | 2.565939718 | 3.042452716 | 12.65549132 | 6.561150316 |
| 5.208913652 | 2.166266322 | 1.746688762 | 12.13078283 | 0.040892943 |
| 3.795560011 | 4.097442489 | 3.529816228 | 11.96669254 | 0.042870895 |
| 2.977937903 | 2.138827122 | 0.1673741   | 13.15926678 | 0.164323439 |
| 4.498585208 | 1.067318596 | 1.667439826 | 13.23596606 | 0.020480648 |
| 3.995448594 | 1.92555434  | 0           | 11.88268982 | 0           |
| 6.621464697 | 0.570057011 | 2.30249387  | 12.50921906 | 0           |
| 6.398759611 | 1.589672352 | 2.813175249 | 13.01477262 | 5.006304207 |
| 1.903860273 | 0.238812347 | 0.329583069 | 9.245817106 | 0.321909994 |
| 6.191169971 | 3.752307954 | 2.787542642 | 12.74195804 | 0.211907863 |
| 7.684026896 | 4.66355581  | 0           | 13.36871043 | 0           |
| 3.252018506 | 1.05453556  | 2.07271296  | 10.00369772 | 0.016538074 |
| 2.488784176 | 2.455448864 | 4.364221534 | 13.79369845 | 1.384883034 |
| 6.659928685 | 2.116422866 | 2.307784736 | 12.04490015 | 0           |
| 5.147328603 | 1.661453672 | 1.663862667 | 12.42359581 | 0.019576327 |
| 4.105501639 | 1.195639363 | 4.387551204 | 13.59055348 | 0.061512496 |
| 5.579147196 | 2.276086584 | 1.141924779 | 10.79660626 | 0           |
| 3.454441004 | 2.111936907 | 0           | 10.87709345 | 0           |
| 5.175327804 | 1.533785169 | 1.818671972 | 10.39869319 | 0           |
| 4.377532427 | 1.7885759   | 2.347409044 | 11.42074773 | 0           |
| 5.711756759 | 2.642502806 | 0.380653733 | 12.25808424 | 0.371184849 |
| 5.158578562 | 0           | 3.017784539 | 11.52147365 | 7.056080234 |
| 4.988058605 | 1.303172948 | 1.309135756 | 12.39517498 | 0.098055217 |
| 5.135164221 | 2.522696561 | 4.01504474  | 9.499677335 | 0           |
| 4.203094366 | 1.087328256 | 13.16481678 | 10.73451039 | 0           |
| 6.392571747 | 0.068768837 | 2.34995297  | 11.05483429 | 0.085054967 |
| 4.156766842 | 1.230251994 | 1.233691651 | 14.29136421 | 0.07305201  |
| 5.312875501 | 3.074346622 | 1.647960226 | 11.58894194 | 0.218984283 |
| 3.664897524 | 1.339161427 | 1.346662712 | 12.30728169 | 9.31504962  |
| 5.98953279  | 1.35967551  | 1.74875498  | 13.38705064 | 0           |
| 4.489908824 | 2.441985142 | 2.858660553 | 12.73962079 | 0.903133582 |
| 0.122940924 | 1.36328799  | 3.093620518 | 9.674074326 | 0.11940071  |
| 4.261010155 | 0.178005862 | 4.258545862 | 11.30428302 | 0.232524898 |
| 6.319999117 | 1.988419544 | 3.677867826 | 12.4685017  | 0.11411628  |
| 5.035281822 | 3.013837467 | 1.342569807 | 11.39997145 | 0.109359105 |
| 5.553165164 | 3.120326108 | 3.067226675 | 11.00857909 | 0           |
| 5.064115368 | 2.045264981 | 1.409924866 | 12.41862413 | 1.412122443 |

| hsa-miR-518a-5p | hsa-miR-527 | hsa-miR-5187-5p | hsa-miR-431-5p | hsa-miR-518a-3p |
|-----------------|-------------|-----------------|----------------|-----------------|
| 0.128472395     | 0.127910644 | 1.407699657     | 1.415397623    | 0.131896921     |
| 0.007380685     | 0.007355625 | 1.025509904     | 3.037947632    | 0.007532355     |
| 0               | 0           | 2.700288334     | 5.55971482     | 0               |
| 2.78843446      | 2.788632836 | 3.253900934     | 3.861915486    | 0.860133431     |
| 0.016951637     | 0.016892767 | 3.080372614     | 2.402746347    | 0.017308127     |
| 0.035717884     | 0.035588424 | 2.4801182       | 3.349407141    | 0.0365027       |
| 2.938272869     | 2.472265748 | 2.869370092     | 1.76968493     | 1.773828425     |
| 0               | 0           | 1.395296807     | 4.081248633    | 0               |
| 0               | 0           | 1.993005703     | 0.767070236    | 0               |
| 0               | 0           | 2.765601129     | 4.751163468    | 0               |
| 0.12826288      | 0.127702261 | 1.407091519     | 2.529270661    | 0.131680458     |
| 0.108265173     | 0.107809396 | 1.348268275     | 3.069433093    | 0.111040227     |
| 0               | 0           | 2.255415702     | 1.524503988    | 0.950390949     |
| 1.885190804     | 1.885052433 | 2.907444376     | 3.160094651    | 0.076815733     |
| 0               | 0           | 1.546927385     | 1.95773757     | 0               |
| 2.367216559     | 1.927223854 | 0.074590108     | 2.368717747    | 1.287602274     |
| 4.258457719     | 4.205171419 | 1.218752333     | 1.593815805    | 3.895564029     |
| 0               | 0           | 2.695257974     | 0              | 0               |
| 0.145188422     | 0.144534048 | 2.889416314     | 8.271767506    | 0.149181704     |
| 0               | 0           | 1.952620039     | 2.753244288    | 0               |
| 0.452956012     | 0.449797    | 2.191792208     | 2.292674494    | 0.4726242       |
| 0.127395684     | 0.126839746 | 0.108838105     | 3.145377959    | 0.130784554     |
| 0               | 0           | 2.16677986      | 8.511127026    | 0               |
| 0.22203057      | 0.220892766 | 1.663819469     | 0.238619658    | 0.229007528     |
| 0               | 0           | 2.134173482     | 7.414589163    | 0               |
| 0               | 0           | 2.646409536     | 2.912087195    | 0.449608541     |
| 0.010962532     | 0.010924992 | 2.048370272     | 2.050200815    | 0.011189777     |
| 0.205319487     | 0.204294867 | 0.171846558     | 0.22022369     | 0.211595753     |
| 0.055714848     | 0.05550391  | 3.250365848     | 2.577182758    | 0.056995115     |
| 0               | 0           | 2.499906133     | 2.485789014    | 0               |
| 0.133130953     | 0.13254384  | 1.421178762     | 2.890754813    | 0.136711115     |
| 6.908105694     | 6.893988667 | 3.160425512     | 1.117886251    | 7.729730163     |
| 9.143598901     | 9.037071563 | 0.0558387       | 2.279709171    | 10.18636223     |
| 2.302742768     | 2.303026685 | 2.107035506     | 2.091980678    | 3.266501512     |
| 0               | 0           | 3.203484101     | 2.21115255     | 0               |
| 0               | 0           | 3.49736597      | 5.672697032    | 0.735343107     |
| 0.107745744     | 0.107292605 | 1.346719507     | 1.351983065    | 0.110504652     |
| 0.017836301     | 0.017774231 | 1.657836676     | 1.659555283    | 0.018212188     |
| 0.048901936     | 0.048719482 | 2.80214695      | 3.411984439    | 0.050008875     |
| 0.02640526      | 0.026311542 | 0.023188332     | 2.446557058    | 0.026973095     |
| 0               | 0           | 0               | 2.58389252     | 0               |
| 0.007361776     | 0.007336781 | 2.619533299     | 1.025415935    | 0.007513051     |
| 4.525149727     | 4.423055711 | 1.431308689     | 1.440092771    | 6.36472672      |
| 0.195540987     | 0.194580522 | 0.164079086     | 0.209493105    | 0.20142064      |
| 4.62475187      | 4.623018914 | 2.609724396     | 4.188765355    | 4.634796695     |
| 0               | 0           | 1.889301134     | 0              | 0               |
| 0.283385624     | 0.281793941 | 0.232491874     | 1.856825109    | 0.293184302     |
| 0.115781928     | 0.115287497 | 1.370561314     | 3.099558826    | 0.118793715     |
| 6.280338065     | 6.265077666 | 0.850725058     | 3.568185778    | 6.338728471     |
| 0.223870678     | 0.222720138 | 0.186475941     | 1.693256137    | 0.23092656      |
| 0.102736461     | 0.102308535 | 1.331728073     | 2.772459092    | 1.339230981     |
| 0               | 0           | 0               | 4.157323926    | 0               |
| 0               | 0           | 2.448069128     | 2.262452003    | 0               |
| 0.16864016      | 0.167848282 | 0.142507005     | 3.535215449    | 0.173479603     |
| 1.717416102     | 1.717379081 | 1.713427369     | 2.964472274    | 0.032608248     |
| 0               | 0           | 2.489536761     | 2.661951844    | 0               |

|             |             |             |             |             |
|-------------|-------------|-------------|-------------|-------------|
| 0.11284854  | 0.112369302 | 0.09678667  | 3.31885061  | 0.115767258 |
| 0           | 0           | 3.32048036  | 2.232248901 | 0           |
| 0.006926477 | 0.006902984 | 1.613596967 | 5.323720766 | 0.007068655 |
| 1.661064543 | 1.062896784 | 0.015941986 | 2.082347525 | 1.661069446 |
| 0           | 0           | 0.99027559  | 3.260846853 | 0           |
| 8.611170028 | 8.527817998 | 1.29430876  | 9.15727989  | 9.080103424 |
| 3.205412737 | 3.205367334 | 2.61739761  | 2.031739358 | 3.357944008 |
| 0           | 0           | 3.113355082 | 9.074450572 | 0           |
| 0.748373856 | 0.748260156 | 1.275754988 | 3.493854075 | 0           |
| 0.000387756 | 0.000386462 | 2.001733755 | 1.586609105 | 0.000395588 |
| 0.165575694 | 0.164802285 | 1.512849965 | 2.664262408 | 0.170301364 |
| 0.904312303 | 0.9042766   | 2.192771483 | 2.187657832 | 0.904641989 |
| 0.215810147 | 0.214714997 | 2.76951805  | 1.670575443 | 0.222522905 |
| 0           | 0           | 1.417954863 | 3.107654962 | 0           |
| 4.595777151 | 4.539457463 | 1.913950525 | 3.068924474 | 4.538203552 |
| 0.041441449 | 0.041289328 | 4.281873403 | 1.754880411 | 0.042363956 |
| 0.044910703 | 0.044744588 | 2.190246759 | 0.047275911 | 0.045918275 |
| 0.245035637 | 0.243734708 | 2.400169249 | 1.752188671 | 0.253024598 |
| 0           | 0           | 1.363947621 | 1.361855869 | 0.819006646 |
| 0           | 0           | 1.754473598 | 2.715004844 | 0           |
| 3.637180454 | 3.63689917  | 2.151704413 | 2.48752584  | 1.731570869 |
| 0.18343654  | 0.182553369 | 1.56173986  | 1.578084456 | 0.188838912 |
| 0           | 0           | 1.841913282 | 2.467388738 | 0           |
| 0.053258191 | 0.05305761  | 1.794708795 | 4.733643647 | 0.054475418 |
| 0.163338974 | 0.16257895  | 2.611064873 | 3.892228565 | 0.16798221  |
| 0           | 0           | 3.144040224 | 4.970580762 | 0           |
| 0           | 0           | 1.280600899 | 2.429244389 | 0           |
| 0.020653047 | 0.020580705 | 1.669092221 | 6.68277496  | 0.021091216 |
| 0           | 0           | 1.779744964 | 3.311135858 | 0           |
| 0           | 0           | 3.029120535 | 7.331061099 | 0           |
| 0.118184598 | 0.11767762  | 0.10121812  | 1.384072795 | 0.121273269 |
| 0           | 0           | 2.472815117 | 1.153902851 | 0           |
| 0.31836446  | 0.316487078 | 0.258906493 | 1.950061464 | 0.329948356 |
| 0.000421944 | 0.000420535 | 2.586963536 | 3.809638237 | 0.000430467 |
| 0.251726673 | 0.25037671  | 0.208185354 | 2.952863561 | 0.260020316 |
| 1.604502121 | 1.604318583 | 2.249106406 | 3.99590426  | 2.750666545 |
| 0           | 0           | 2.409774212 | 3.263237114 | 0           |
| 6.265357157 | 6.162813294 | 3.389984507 | 4.163217448 | 5.630983286 |
| 0           | 0           | 0           | 9.078362823 | 0           |
| 0           | 0           | 3.627517177 | 5.920562025 | 0           |
| 0           | 0           | 2.960568606 | 4.158045858 | 0           |
| 4.418439729 | 4.11532498  | 2.353452558 | 3.213715914 | 5.516884749 |
| 0           | 0           | 1.961678969 | 2.280368936 | 0           |
| 0.020617238 | 0.020545028 | 2.089896806 | 7.231785424 | 1.071263673 |
| 0           | 0           | 1.855083169 | 5.96396101  | 0           |
| 0           | 0           | 0.824805573 | 3.525144253 | 0           |
| 0           | 0           | 1.571752207 | 7.647431768 | 0           |
| 1.261898828 | 1.261861446 | 1.266335116 | 4.149691779 | 0           |
| 0.503250907 | 0.502996132 | 1.818904193 | 4.256731853 | 0.505214256 |
| 0           | 0           | 2.74766363  | 3.499728371 | 0           |
| 0.011423176 | 0.011384017 | 3.962843791 | 4.762756579 | 0.011660235 |
| 0           | 0           | 2.913256721 | 0           | 0           |
| 0           | 0           | 1.843651125 | 8.091309804 | 0           |
| 0           | 0           | 2.170025727 | 10.75946354 | 0           |
| 4.530050035 | 4.402599076 | 3.035601477 | 3.117017072 | 5.849194003 |
| 0.014496878 | 0.014446821 | 2.387921071 | 0.015206879 | 0.014799959 |
| 3.289547365 | 3.118367521 | 2.428880917 | 6.572372666 | 3.9310493   |
| 0           | 0           | 0           | 1.720138497 | 0           |



|             |             |             |             |             |
|-------------|-------------|-------------|-------------|-------------|
| 0.270938194 | 0.269443461 | 1.786720784 | 1.823152346 | 0.280132621 |
| 0           | 0           | 1.978632207 | 2.860844778 | 0           |
| 0           | 0           | 1.35279174  | 3.395115136 | 0           |
| 0           | 0           | 2.359734123 | 2.961322517 | 0.431820101 |
| 1.096977636 | 1.097000657 | 2.713224176 | 2.454331057 | 1.096708088 |
| 0.101838413 | 0.101414966 | 3.603889305 | 3.043371392 | 0.104415622 |
| 2.013126011 | 2.01333839  | 2.735807261 | 1.771607391 | 0.627662072 |
| 0.423024398 | 0.422727739 | 2.475622342 | 6.994764123 | 0           |
| 0.005753719 | 0.005734259 | 2.348428201 | 1.609279512 | 0.005871487 |
| 0.050322442 | 0.050134111 | 3.033210087 | 3.711772609 | 0.051465133 |
| 0.067404944 | 0.067143388 | 2.278318722 | 8.248311629 | 0.068993545 |
| 8.210929572 | 8.158983806 | 1.134485791 | 3.522873174 | 8.446859746 |
| 0.089257687 | 0.088895601 | 2.692628143 | 6.000819698 | 0.091459753 |
| 0.009091297 | 0.009060303 | 0.008022353 | 1.031354434 | 1.031641852 |
| 0.027054242 | 0.026958078 | 2.117048861 | 2.121929512 | 0.027636915 |
| 0.077864016 | 0.077555304 | 0.067416674 | 2.671181831 | 0.079740196 |
| 0           | 0           | 2.988525806 | 3.196557394 | 0           |
| 0.04499917  | 0.044832696 | 2.785821304 | 2.19936814  | 0.046008928 |
| 0           | 0           | 1.12994279  | 3.465923329 | 0           |
| 1.55554408  | 0.678727975 | 2.32775904  | 1.557844425 | 1.182672908 |
| 0.06602275  | 0.065767293 | 1.218681675 | 2.892576932 | 0.067574174 |
| 5.91661951  | 5.857137958 | 1.463538028 | 3.14572439  | 6.648658247 |
| 1.74739294  | 1.747342502 | 2.167948137 | 1.746748707 | 0.040264889 |
| 0.041290782 | 0.041139264 | 2.994909453 | 1.139762708 | 0.042209622 |
| 0.156719811 | 0.155998928 | 1.488202053 | 7.540004806 | 0.161122109 |
| 0.019761736 | 0.019692658 | 0.017386294 | 3.271125344 | 0.02018011  |
| 0           | 0           | 0.942187511 | 3.369836362 | 0           |
| 0           | 0           | 1.692843383 | 2.302392207 | 0           |
| 3.590980593 | 3.590971778 | 1.003960057 | 2.327460353 | 4.176100785 |
| 0.303159428 | 0.30140864  | 1.864084759 | 0.328981558 | 0.313951466 |
| 0.201330446 | 0.200332182 | 0.168682613 | 1.629490154 | 2.322978037 |
| 0           | 0           | 2.947673538 | 4.168377379 | 0           |
| 0.015962677 | 0.01590737  | 2.069998999 | 3.784730526 | 0.016297577 |
| 0.117839476 | 0.117334306 | 3.662524068 | 2.831948211 | 0.120917066 |
| 1.180414937 | 1.180345816 | 0.677877964 | 1.852179419 | 0           |
| 0.018890549 | 0.01882465  | 2.082541593 | 4.007004338 | 0.019289653 |
| 0.059155697 | 0.058930089 | 2.576440104 | 3.459429418 | 0.060525285 |
| 0           | 0           | 2.059961742 | 1.508633781 | 0           |
| 0           | 0           | 0           | 2.575503346 | 0           |
| 0           | 0           | 2.640232689 | 2.615962783 | 0           |
| 0           | 0           | 3.566228029 | 3.20457657  | 0           |
| 0.348192396 | 0.346055941 | 2.659693539 | 0.379910163 | 0.361400764 |
| 6.05001443  | 5.907024512 | 1.870425604 | 3.429199488 | 6.496656558 |
| 0.094019549 | 0.093634537 | 0.081048218 | 1.955081621 | 0.096361718 |
| 0           | 0           | 1.529981335 | 3.513917356 | 0           |
| 0           | 0           | 1.085398866 | 3.226213578 | 0           |
| 0.081640217 | 0.081314046 | 2.663969999 | 1.909319991 | 0.083622947 |
| 0.070187373 | 0.069913444 | 1.231794685 | 2.303939073 | 0.071851397 |
| 1.652077847 | 1.651838467 | 0.173917928 | 1.648286926 | 2.34401775  |
| 9.106038167 | 9.04402822  | 0.091151646 | 6.164697584 | 9.629930721 |
| 0           | 0           | 2.539774563 | 2.526972013 | 0           |
| 0.466563352 | 0.466288788 | 2.435258721 | 2.649075395 | 0           |
| 0.114289131 | 0.113802449 | 0.097984285 | 1.372134343 | 0.117253446 |
| 0.220553102 | 0.219425485 | 2.332934884 | 3.721105648 | 0.227466945 |
| 0.109277577 | 0.108816647 | 0.093814024 | 3.973944553 | 0.112084181 |
| 0.104762387 | 0.104324313 | 1.977463007 | 1.994164604 | 0.107429089 |
| 0           | 0           | 2.821745006 | 6.414774029 | 0           |
| 1.413834968 | 1.413805731 | 0.108297003 | 1.41014353  | 1.413358281 |

| hsa-miR-508-3p | hsa-miR-1295a | hsa-miR-523-3p | hsa-miR-18a-3p | hsa-miR-517c-3p |
|----------------|---------------|----------------|----------------|-----------------|
| 4.054142613    | 2.078889304   | 0.130209464    | 3.137553855    | 0.124144499     |
| 2.844616329    | 0.007436296   | 0.007457854    | 3.497598014    | 0.007186287     |
| 2.840094947    | 2.754289927   | 0              | 3.155048666    | 0               |
| 4.524915745    | 0.859782626   | 1.411985204    | 4.237376531    | 0               |
| 3.547862122    | 3.256180872   | 1.058824123    | 3.407979912    | 0.016495209     |
| 3.64159966     | 1.122613785   | 0.036116917    | 1.732451083    | 0.034715204     |
| 6.549648633    | 2.475619461   | 1.773601817    | 0.245218824    | 2.925146093     |
| 3.979374238    | 1.032625877   | 0              | 1.911072229    | 0               |
| 1.29624131     | 4.516352463   | 0              | 1.983545101    | 0               |
| 1.255057745    | 3.264866781   | 0              | 4.257166122    | 0               |
| 3.147321548    | 1.418441593   | 0.129996434    | 2.862678689    | 0.123943656     |
| 2.792384472    | 0.10927935    | 0.109673539    | 3.486405696    | 0.104749642     |
| 2.925978386    | 4.244330746   | 0              | 0              | 0               |
| 3.825653996    | 4.27177721    | 0.075931575    | 1.251919571    | 0.072733643     |
| 4.341766426    | 0             | 0              | 3.274360482    | 0               |
| 4.889414345    | 0.087122546   | 4.113568914    | 0.084747382    | 0.083658504     |
| 3.415443749    | 4.5443139     | 3.510479383    | 2.141006798    | 2.852289196     |
| 4.971297769    | 4.359762438   | 0              | 3.667714732    | 0               |
| 4.674153121    | 4.743937321   | 0.147213104    | 5.604179043    | 0.140151814     |
| 2.753441034    | 2.753526156   | 0.963119044    | 2.270844411    | 0               |
| 3.538276165    | 0.460056446   | 0.46284313     | 2.274947525    | 0.429084014     |
| 7.306875018    | 4.037829538   | 0.129114715    | 2.519837124    | 0.1231123       |
| 2.419411173    | 5.516302556   | 0              | 2.829270897    | 0               |
| 7.365330021    | 2.386035057   | 0.225560799    | 4.367034941    | 0.2133124       |
| 2.791621042    | 0             | 0              | 2.961125757    | 0               |
| 2.229876678    | 2.91669216    | 0.873671707    | 3.250092705    | 0               |
| 2.862466063    | 2.638905705   | 0.011078143    | 4.701730807    | 0.010671384     |
| 4.349031365    | 1.645011424   | 0.20849661     | 0.200627411    | 0.197460828     |
| 3.981133493    | 1.811663054   | 0.056365465    | 3.437470596    | 0.054082945     |
| 1.714337692    | 0.787928053   | 0              | 3.36438836     | 0               |
| 8.129406183    | 2.886014524   | 0.134946747    | 2.540561106    | 0.128608881     |
| 4.939441762    | 3.171083825   | 5.853687825    | 4.345987848    | 6.498700031     |
| 4.129281022    | 3.109951622   | 9.487725441    | 3.629224881    | 9.027807741     |
| 8.065290961    | 0             | 1.176084028    | 4.153184097    | 2.48989911      |
| 0.754889304    | 6.333633071   | 0.749599177    | 2.779134479    | 0               |
| 6.280647284    | 2.587129545   | 1.635486406    | 3.03711445     | 0               |
| 4.096407442    | 3.292241545   | 0.109145934    | 2.44733697     | 0.104250453     |
| 2.40642524     | 3.793106591   | 0.018027501    | 3.412363967    | 0.017355087     |
| 1.162952645    | 2.54660114    | 0.049464565    | 2.813506817    | 0.047489856     |
| 5.049202882    | 7.424855169   | 0.026694037    | 3.592510606    | 0.025679022     |
| 5.997844944    | 5.564554446   | 0              | 2.111159709    | 0               |
| 1.025136934    | 5.76782868    | 0.007438744    | 3.945483608    | 0.007167884     |
| 3.412757734    | 1.443893225   | 5.584240839    | 2.89362514     | 5.255176047     |
| 3.39734358     | 1.617114716   | 0.198518121    | 3.376428079    | 0.188170153     |
| 3.279067455    | 0.164603046   | 5.120366847    | 3.86747894     | 3.259453074     |
| 3.040279751    | 0.91458095    | 0              | 3.041922077    | 0               |
| 4.47516128     | 1.859923181   | 0.288335273    | 1.855762111    | 0.271234007     |
| 2.029907719    | 3.094335936   | 0.117310141    | 2.815790113    | 0.111969896     |
| 4.454331604    | 4.081960058   | 6.662046327    | 2.941921559    | 6.170136833     |
| 2.388510455    | 0.226439197   | 0.227440663    | 2.385393979    | 0.215055877     |
| 1.983434049    | 1.339682952   | 1.33961662     | 3.931712749    | 1.339297587     |
| 1.655148007    | 2.418800885   | 0              | 1.651460234    | 0               |
| 6.324369163    | 2.565578494   | 0              | 1.881713369    | 0               |
| 1.528732377    | 1.539134074   | 0.171092346    | 2.664801341    | 0.162553523     |
| 4.490664112    | 2.738186946   | 0.032266594    | 2.142553503    | 0.031024675     |
| 4.95180996     | 0             | 0              | 3.458646239    | 0               |

|             |             |             |             |             |
|-------------|-------------|-------------|-------------|-------------|
| 4.117953337 | 0.113915058 | 0.114329641 | 1.370967861 | 0.109153018 |
| 5.495011938 | 1.488078932 | 0           | 2.725871924 | 0           |
| 2.031627352 | 4.284965905 | 0.006998817 | 3.843596627 | 0.006744234 |
| 6.920493524 | 3.091140476 | 1.062805998 | 3.090356525 | 1.062928176 |
| 4.664002531 | 0           | 0           | 1.616116384 | 0           |
| 1.938659485 | 1.942579043 | 9.211281444 | 3.217059013 | 8.730524252 |
| 2.619090435 | 5.246801026 | 3.35782256  | 4.206336149 | 2.354864591 |
| 6.843628645 | 3.461749541 | 0           | 4.014820582 | 0           |
| 4.781206804 | 1.271481843 | 0           | 3.060973314 | 0           |
| 2.809328957 | 4.461532524 | 0.000391742 | 2.586883231 | 0.000377709 |
| 4.058935984 | 0.167299418 | 0.167970425 | 2.654342896 | 0.159629952 |
| 3.17507497  | 7.046178017 | 0           | 3.177220887 | 0           |
| 3.185106147 | 1.674684102 | 0.219207267 | 1.67266533  | 0.207415719 |
| 1.417460026 | 0.862036223 | 0           | 3.110937847 | 0           |
| 3.596585144 | 1.911083127 | 3.357619741 | 1.911335157 | 3.705851649 |
| 5.68016175  | 3.202700907 | 0.041910424 | 4.964729137 | 0.04026363  |
| 3.68605951  | 3.809473538 | 0.045422878 | 2.197956107 | 0.043624788 |
| 2.92741954  | 5.098019172 | 0.249075395 | 5.517528421 | 0.235081106 |
| 2.319105305 | 1.360192897 | 0           | 3.301051739 | 0           |
| 4.818774737 | 3.511348167 | 0           | 1.354703209 | 0           |
| 2.980522865 | 0.035700648 | 3.174653813 | 1.121750727 | 1.121725779 |
| 3.35406618  | 8.800042461 | 0.186172891 | 2.259111693 | 0.176654064 |
| 5.081963361 | 1.162654406 | 0           | 3.25379294  | 0           |
| 3.586291204 | 2.565505928 | 0.05387681  | 4.724177105 | 0.051706202 |
| 5.931136751 | 0.165032759 | 0.165692071 | 1.522687647 | 0.157495371 |
| 5.327854324 | 2.558639312 | 0           | 3.294482288 | 0           |
| 4.439465039 | 1.276343297 | 0           | 3.190694266 | 0           |
| 1.0699574   | 1.071536589 | 0.020875913 | 3.690300296 | 1.071642682 |
| 1.769560856 | 3.457878699 | 0           | 0.918529874 | 0           |
| 5.572756609 | 3.590421553 | 0           | 5.105355345 | 0           |
| 5.618995384 | 3.53191198  | 0.119751725 | 3.327860471 | 0.11427637  |
| 12.15385679 | 2.761076893 | 0           | 2.764252918 | 0           |
| 6.310271378 | 0.322567184 | 0.324210182 | 1.946597055 | 0.304061614 |
| 3.809639371 | 0.00042507  | 0.000426281 | 4.172171979 | 0.00041101  |
| 4.369263536 | 0.254742823 | 1.77455138  | 1.771294576 | 0.241401032 |
| 4.757384948 | 2.288789319 | 0.19412379  | 2.740474093 | 1.602101759 |
| 1.832670527 | 0           | 0.874386561 | 2.811879334 | 0           |
| 4.536111709 | 7.863821753 | 5.958654784 | 2.653753318 | 3.979823615 |
| 3.318700876 | 0.704517607 | 0           | 4.752784737 | 0           |
| 3.510874673 | 3.847501021 | 0           | 1.693170997 | 0           |
| 4.407671114 | 1.805445352 | 0           | 2.118420475 | 0           |
| 3.411115376 | 0.088293245 | 4.421058625 | 1.930697794 | 4.411415432 |
| 6.377615228 | 0.970118225 | 0           | 0.970056848 | 0           |
| 5.434550212 | 1.071414095 | 0.020839699 | 0.020284677 | 0.020057488 |
| 3.76442537  | 4.898208102 | 0           | 3.051842555 | 0           |
| 2.898184951 | 0.824244368 | 0           | 2.545047473 | 0           |
| 3.982680964 | 0.988892764 | 0           | 4.567935385 | 0           |
| 3.166095682 | 1.947853094 | 2.597893558 | 1.261839425 | 0.740338302 |
| 3.562624101 | 2.478569781 | 0           | 3.967852533 | 0.501692054 |
| 0.815237116 | 0.802049216 | 0           | 1.60473677  | 0           |
| 1.038908438 | 6.789571249 | 0.011543779 | 1.039856511 | 0.011119472 |
| 5.92109339  | 0           | 0           | 2.042704149 | 0           |
| 4.265228513 | 1.838889776 | 0           | 2.820835915 | 0           |
| 6.911389047 | 0.887986432 | 0           | 4.347372015 | 0           |
| 2.608189685 | 1.145194384 | 5.324770015 | 2.447938749 | 4.217623584 |
| 4.400299901 | 1.646091569 | 0.014651057 | 2.06596179  | 0.014108724 |
| 1.080407751 | 0.023968642 | 4.71005338  | 3.70575142  | 3.288175301 |
| 4.973967503 | 3.133645125 | 0           | 2.4971428   | 0           |

|             |             |             |             |             |
|-------------|-------------|-------------|-------------|-------------|
| 6.514400186 | 3.001579327 | 0.275584213 | 0.264107597 | 0.259518271 |
| 4.956747317 | 3.570634142 | 0           | 2.213341601 | 0           |
| 2.708705642 | 5.178907778 | 0           | 4.393515743 | 0           |
| 4.608959214 | 1.174856284 | 0.43062497  | 2.578235048 | 0           |
| 6.54562694  | 1.702037529 | 0.028410901 | 3.84283659  | 0.02732653  |
| 3.64661282  | 2.427925765 | 0.103146588 | 3.460654449 | 0.098571036 |
| 2.223576446 | 3.610643518 | 0           | 3.75799573  | 1.478677442 |
| 3.447775142 | 0           | 0           | 0.421804807 | 0.421168739 |
| 4.423843694 | 2.34964942  | 0.005813641 | 2.836165068 | 0.005602747 |
| 7.486757924 | 2.552784005 | 0.050903223 | 4.337261551 | 0.048864992 |
| 1.22231258  | 2.292194456 | 0.068212015 | 4.576168926 | 0.06538277  |
| 4.456180484 | 3.195286086 | 7.582048849 | 3.19345758  | 7.652552365 |
| 3.888754413 | 1.297268949 | 0.090375802 | 3.409266996 | 0.086461772 |
| 4.857398376 | 3.369017172 | 0.009186745 | 3.954433036 | 0.008850889 |
| 3.307057028 | 4.896603087 | 0.027350561 | 2.121464277 | 0.026309082 |
| 6.205635064 | 0.078550377 | 0.078816936 | 2.332306534 | 0.075478688 |
| 4.681352476 | 1.578238176 | 0           | 2.522974024 | 0           |
| 4.403132391 | 6.801539272 | 2.199383143 | 3.807272296 | 1.15375631  |
| 1.790036113 | 0           | 0           | 2.030121776 | 0           |
| 3.169388724 | 2.804276666 | 0.679442521 | 2.660205722 | 1.854304979 |
| 10.29776772 | 0.066590525 | 0.066810962 | 0.064847861 | 0.06404758  |
| 3.646349916 | 1.744557042 | 4.709868334 | 3.856932797 | 4.971789385 |
| 3.90267576  | 1.134935635 | 0.039835804 | 2.174609118 | 0.038277412 |
| 4.802083036 | 0.041627318 | 0.041757894 | 4.294855988 | 1.141405866 |
| 2.170904378 | 0.158326067 | 0.158951196 | 2.965924862 | 0.151175013 |
| 2.905693446 | 0.019915075 | 0.019974538 | 2.415100596 | 0.019226247 |
| 3.36993908  | 0.94177482  | 0.941801049 | 2.914134358 | 0           |
| 2.126921009 | 0           | 0           | 1.394029029 | 0           |
| 3.706580221 | 4.398482653 | 4.864195256 | 2.590606052 | 3.813338834 |
| 3.995297412 | 0.307077    | 0.308607862 | 3.083301333 | 0.289808897 |
| 3.41780386  | 4.666229577 | 1.633712985 | 3.118597736 | 0.19367214  |
| 1.280413733 | 2.780413263 | 0           | 4.053594541 | 0           |
| 2.88713675  | 0.016085437 | 0.016133037 | 4.475727728 | 0.015533844 |
| 6.249053143 | 2.828112529 | 0.119400995 | 3.697792371 | 0.113945107 |
| 2.655450222 | 6.625651879 | 1.180743775 | 2.310195625 | 0           |
| 3.557741748 | 2.901106997 | 0.019093555 | 4.742450478 | 0.018379674 |
| 6.685358188 | 0.059657037 | 0.059851646 | 2.257065773 | 0.057410638 |
| 1.145498976 | 2.744290803 | 0           | 2.880509437 | 0           |
| 1.39690018  | 0           | 0           | 3.34464417  | 0           |
| 2.895472437 | 2.764088289 | 0           | 3.135041741 | 0           |
| 2.753672252 | 5.093798271 | 0           | 1.384764194 | 0           |
| 3.605477035 | 2.752773847 | 0.354852292 | 3.839875001 | 0.331944917 |
| 4.881579044 | 3.930738791 | 7.446750517 | 1.462461522 | 4.368146196 |
| 1.951929427 | 2.734847846 | 0.095208657 | 3.60199526  | 0.091047415 |
| 5.013239875 | 0           | 0           | 4.321347233 | 0           |
| 14.60081227 | 1.442160899 | 0           | 1.442266176 | 0           |
| 3.187845715 | 3.184723303 | 0.082647158 | 1.909072569 | 0.079120537 |
| 1.863831583 | 1.236227464 | 1.867239004 | 3.921110268 | 0.068069876 |
| 4.21598524  | 4.037575854 | 0.211166917 | 2.336378226 | 1.649154176 |
| 3.059238772 | 1.350129731 | 8.540514893 | 3.945312927 | 8.212860534 |
| 3.943706129 | 1.747702509 | 0           | 1.748161861 | 0           |
| 4.722072726 | 0.467240614 | 0           | 3.216431273 | 0.464865252 |
| 4.452038329 | 3.318365773 | 0.115793314 | 0.112054102 | 0.110536519 |
| 4.403710247 | 0.223070206 | 0.224051535 | 5.615784259 | 0.211912235 |
| 6.49473797  | 1.360056364 | 0.110701918 | 3.958191717 | 0.105722504 |
| 3.484032055 | 0.105737079 | 0.106115885 | 2.436119424 | 0.10138272  |
| 4.775968453 | 1.526543568 | 0           | 2.893016798 | 0           |
| 2.520546539 | 4.754742408 | 0.128448184 | 2.857012482 | 1.412979898 |

| hsa-miR-1283 | hsa-miR-942-3p | hsa-miR-3189-3p | hsa-miR-514a-3p | hsa-miR-525-3p |
|--------------|----------------|-----------------|-----------------|----------------|
| 0.121615018  | 2.031606509    | 0.089622678     | 2.872026713     | 0.123405116    |
| 0.00707124   | 1.6143256      | 0.00551952      | 2.621514361     | 0.007152768    |
| 0            | 0.782838732    | 0.380800022     | 1.571680173     | 0.372692288    |
| 0.859344054  | 0.86331269     | 0.865364462     | 3.36394668      | 1.811839929    |
| 0.016225354  | 1.056562076    | 1.650007764     | 2.402515143     | 0.016416566    |
| 0.034123515  | 2.145710495    | 0.02626415      | 3.50296576      | 0.034542684    |
| 0.235128099  | 1.699055646    | 0.164426034     | 6.702378433     | 2.461624622    |
| 0            | 1.703675643    | 0               | 3.329155466     | 0              |
| 0            | 2.260991249    | 0               | 1.680483009     | 0              |
| 0            | 0.736173004    | 0               | 0               | 0              |
| 0.121419187  | 0.096158467    | 1.380581388     | 1.411864653     | 0.123205742    |
| 0.102690604  | 0.081913223    | 0.076373211     | 0.116364104     | 0.104148104    |
| 0            | 0              | 0               | 3.50809114      | 0              |
| 0.071390549  | 1.860905391    | 2.282177887     | 3.685975876     | 0.072341619    |
| 0            | 0              | 3.865392031     | 4.341771071     | 0              |
| 0.082079623  | 0.065998931    | 0.061665728     | 4.00396622      | 1.925186663    |
| 1.593428851  | 1.612709967    | 1.233884075     | 2.536048512     | 1.592809345    |
| 0            | 3.871385329    | 5.355335067     | 3.128898033     | 0              |
| 0.137213287  | 1.436341707    | 0.100366301     | 3.446721347     | 0.139292472    |
| 0.963027934  | 2.274960663    | 0               | 0.963768628     | 0              |
| 0.415608389  | 0.296860019    | 0.269539684     | 3.906857148     | 0.425109786    |
| 0.120608552  | 1.388180755    | 0.088924017     | 5.253171379     | 0.122380461    |
| 0            | 2.173406019    | 0               | 1.445923461     | 0              |
| 0.208267168  | 0.159693056    | 1.611227671     | 5.497219785     | 0.21183386     |
| 0            | 1.423491736    | 0               | 2.791253024     | 0              |
| 0.871358323  | 0.450210401    | 0.454532526     | 1.212427097     | 0              |
| 0.010499143  | 1.036768565    | 0.008180503     | 0.011619483     | 0.010621196    |
| 0.192904903  | 0.148743857    | 0.137487604     | 3.871273951     | 0.196126295    |
| 0.05312192   | 0.043205284    | 3.226831754     | 3.737372065     | 0.053802586    |
| 0            | 0              | 0               | 0.791742996     | 0              |
| 0.125967204  | 2.816110007    | 0.092636206     | 7.449961269     | 0.127836604    |
| 6.666559355  | 0.027179785    | 0.025529099     | 5.229617303     | 6.242279433    |
| 8.198664058  | 0.049624133    | 0.046468221     | 3.482719841     | 8.919773955    |
| 0.673073254  | 0              | 0               | 7.102951239     | 1.175671152    |
| 0            | 1.284968356    | 1.290327291     | 2.212228324     | 0              |
| 1.253754171  | 2.216906133    | 0.742601787     | 5.933085048     | 0.733603011    |
| 0.102203158  | 1.333430682    | 0.076028759     | 3.968395912     | 0.103652354    |
| 0.017070603  | 1.059468475    | 0.013255202     | 1.060781288     | 0.017272179    |
| 0.046657701  | 1.158789664    | 1.155478682     | 2.215089376     | 0.047247137    |
| 0.025250057  | 2.109056615    | 2.69567278      | 2.712972574     | 0.025553979    |
| 0            | 1.409540794    | 1.815817824     | 5.879785237     | 0              |
| 0.007053137  | 2.840535691    | 0.005505442     | 1.025244963     | 0.007134452    |
| 4.506873648  | 2.056137357    | 0.094903018     | 3.41357324      | 5.364332489    |
| 0.183892595  | 0.142264359    | 0.131606785     | 2.301171729     | 0.186917496    |
| 3.483274267  | 3.403183149    | 1.469810089     | 2.193874388     | 4.015526479    |
| 0            | 1.485700469    | 0               | 2.20251729      | 0              |
| 0.264247796  | 0.198609806    | 0.182441711     | 3.408391555     | 0.269183193    |
| 0.109738951  | 0.087298064    | 0.081335935     | 0.124578441     | 0.111318003    |
| 5.693916225  | 1.810584074    | 0               | 3.66662541      | 6.447945196    |
| 0.209955724  | 0.16088928     | 0.148485942     | 4.272714945     | 0.213561166    |
| 0.097499757  | 0.077928933    | 0.072696787     | 1.984907724     | 0.098869504    |
| 0            | 1.670152696    | 0               | 1.956276351     | 0              |
| 0            | 0.552306379    | 1.395096096     | 4.980993671     | 0              |
| 0.15901115   | 1.497873492    | 0.115120849     | 1.531301342     | 0.161516926    |
| 1.109819137  | 2.945872476    | 0.023519125     | 3.159254341     | 0.030871764    |
| 0            | 1.718841526    | 0               | 4.159390286     | 0              |

|             |             |             |             |             |
|-------------|-------------|-------------|-------------|-------------|
| 0.106989597 | 1.347810593 | 0.07940411  | 3.849081366 | 0.108520906 |
| 0           | 0.637774455 | 1.821336155 | 4.215869683 | 0           |
| 0.006636377 | 0.005499812 | 2.837608064 | 2.031723569 | 0.00671281  |
| 0.017333764 | 2.887630223 | 0.013457702 | 6.165839953 | 2.081784798 |
| 0           | 3.163032412 | 0           | 2.780745618 | 0           |
| 9.172497835 | 0.068949701 | 0.064397363 | 2.72181421  | 8.239157455 |
| 1.614110111 | 3.353589339 | 4.200749774 | 1.613953874 | 2.618697211 |
| 0           | 1.807114041 | 0.639414372 | 5.799313986 | 0           |
| 0           | 3.097109205 | 0           | 3.752529262 | 0           |
| 0.00037176  | 0.000308885 | 0.000291204 | 2.001787852 | 0.000375976 |
| 0.156168457 | 0.122064982 | 0.113213466 | 3.725429385 | 0.158617108 |
| 0           | 1.880719274 | 0           | 2.446695972 | 0           |
| 0.202554618 | 0.15563549  | 0.143732314 | 2.834293465 | 0.205991383 |
| 0           | 0.865529567 | 2.625958202 | 0.864530834 | 0           |
| 3.805936642 | 2.236452037 | 0           | 3.59650271  | 3.071095894 |
| 0.039568998 | 2.167801221 | 4.496506179 | 4.609166027 | 0.040061064 |
| 0.042866675 | 0.035007524 | 0.032846281 | 1.767654188 | 0.043403689 |
| 0.229334507 | 3.994952593 | 0.160788025 | 1.747096102 | 0.23339596  |
| 0           | 0.822637395 | 0           | 0.821816383 | 0           |
| 0.813552673 | 2.075926061 | 0.820927293 | 4.549130524 | 0           |
| 1.121601183 | 2.960277403 | 3.735203754 | 2.754991212 | 1.121699695 |
| 0.172712894 | 2.189386908 | 0.124245293 | 2.261807918 | 0.1755003   |
| 0           | 1.858160128 | 1.183208047 | 4.459933372 | 0           |
| 0.050792007 | 1.17230473  | 2.53340334  | 2.835929556 | 0.051439522 |
| 0.154092535 | 0.120535987 | 0.111817421 | 5.339141511 | 0.156499751 |
| 0           | 0           | 0.982469254 | 5.642666397 | 0           |
| 0           | 1.679709344 | 1.996324864 | 3.978690246 | 0           |
| 0.019760859 | 2.085961309 | 0.015322727 | 0.02192092  | 0.019995686 |
| 0           | 2.190257513 | 1.291991884 | 1.538186409 | 0           |
| 0           | 0           | 0.809604651 | 5.252274596 | 0           |
| 0.111989703 | 1.362725197 | 1.98759783  | 4.889114064 | 0.113608151 |
| 0           | 2.660332661 | 0           | 10.11661395 | 0           |
| 0.295869449 | 2.965881259 | 2.482540956 | 5.288772858 | 0.301654479 |
| 0.000404535 | 1.5866556   | 1.001402994 | 3.172137129 | 0.000409124 |
| 0.235444456 | 1.699850949 | 0.164624164 | 0.276300032 | 0.23965399  |
| 0.179916926 | 0.139392636 | 0.128997414 | 4.297397478 | 0.182856577 |
| 0           | 0.877608519 | 0.879479229 | 3.263300753 | 0           |
| 4.159997998 | 1.04725527  | 1.639368499 | 3.395413645 | 4.658469113 |
| 0           | 1.228192172 | 1.62088514  | 1.595958311 | 0           |
| 0           | 1.72439347  | 0           | 2.871078569 | 0           |
| 0           | 0.859369855 | 0.861470217 | 4.288084282 | 0           |
| 5.316975073 | 0.066848187 | 0.062452133 | 2.710108525 | 3.991783511 |
| 0           | 2.76817487  | 0           | 6.719566303 | 0           |
| 0.019726668 | 1.068575899 | 0.015296486 | 4.109540749 | 0.019961069 |
| 0           | 0.677466389 | 4.107166623 | 2.645369373 | 0           |
| 0           | 0           | 2.764029327 | 0.827416267 | 0           |
| 0           | 1.572224853 | 0           | 0.989092778 | 0           |
| 0.740208351 | 0.745920857 | 0           | 3.658259846 | 0.740283138 |
| 0           | 0.962928562 | 0           | 3.997661407 | 0           |
| 0           | 0.397839321 | 0           | 1.130427261 | 0           |
| 0.010939811 | 1.630184464 | 1.629105834 | 1.039076464 | 0.011067122 |
| 0           | 1.636666087 | 0.999230944 | 5.027934681 | 0           |
| 0           | 1.849601631 | 0           | 2.986488076 | 0           |
| 0           | 1.454173012 | 0.892705716 | 5.487638333 | 0           |
| 3.017546349 | 2.301664694 | 1.54552877  | 1.518833186 | 4.166831198 |
| 0.013879178 | 0.011468177 | 0.010795015 | 4.165308883 | 0.014041833 |
| 1.082266947 | 1.078888618 | 0.017611582 | 0.025253598 | 2.923024168 |
| 0           | 1.339781883 | 0.800705235 | 3.749630142 | 0           |

|             |             |             |             |             |
|-------------|-------------|-------------|-------------|-------------|
| 0.252943963 | 0.190872346 | 0.175500994 | 6.055878101 | 0.257589033 |
| 0           | 2.152663233 | 0           | 4.187081978 | 0           |
| 0           | 2.545489851 | 0           | 2.708177179 | 0           |
| 0           | 1.474674235 | 0.436395251 | 2.456887498 | 0.846694787 |
| 1.09694124  | 0.022084109 | 2.437632288 | 6.644878151 | 0.027192965 |
| 0.096656057 | 1.316638253 | 1.3090233   | 2.427871169 | 2.759256096 |
| 1.479513605 | 1.501362611 | 1.510544557 | 1.483333045 | 1.112748097 |
| 0           | 1.187184877 | 0.859267514 | 2.316974559 | 0           |
| 0.005513386 | 1.607898642 | 1.0190357   | 3.937955809 | 0.005576713 |
| 0.048006226 | 1.775254028 | 1.15978988  | 6.148174683 | 0.048614502 |
| 0.064193348 | 1.215524674 | 2.256035709 | 1.223327713 | 0.065035671 |
| 6.502993518 | 2.488362318 | 1.12774529  | 3.36920675  | 7.309248968 |
| 0.084820964 | 0.068130192 | 1.273809364 | 3.419138649 | 0.085982666 |
| 0.008708639 | 1.030542017 | 2.360448856 | 3.748919177 | 0.008809443 |
| 0.025868969 | 1.690073258 | 0.01999564  | 2.121466514 | 0.026180787 |
| 0.07407718  | 1.246836597 | 0.055875177 | 4.558436763 | 0.075069583 |
| 0           | 3.792929209 | 4.465332761 | 4.602106447 | 0           |
| 0.042950737 | 2.181369953 | 0.032909282 | 3.930049442 | 1.153716457 |
| 0           | 1.515288257 | 2.290236651 | 0.642544021 | 0           |
| 0           | 0           | 0           | 1.187480028 | 0           |
| 0.062885641 | 0.050948547 | 0.047699872 | 8.220139032 | 0.063708515 |
| 4.195440053 | 2.734030165 | 0           | 3.497735507 | 5.43688739  |
| 0.037619895 | 1.735808247 | 1.731930908 | 2.174796159 | 0.038085679 |
| 0.03942573  | 1.13493797  | 0.030262816 | 3.668826523 | 0.039915857 |
| 0.147943919 | 0.115993564 | 0.107666821 | 0.169631733 | 0.150229814 |
| 0.018909738 | 1.06577882  | 0.014669243 | 2.415593696 | 0.019134001 |
| 0           | 1.927968909 | 2.732703941 | 0           | 0           |
| 0           | 3.496160927 | 1.060880532 | 1.046795679 | 0           |
| 3.175729647 | 3.17518565  | 1.589428655 | 3.591075421 | 4.175940487 |
| 0.282149678 | 0.210742848 | 3.91977665  | 3.111498736 | 0.287559299 |
| 0.189230484 | 0.14610715  | 0.13509564  | 1.625149055 | 0.192371222 |
| 0           | 0.756268529 | 2.976090146 | 0           | 0           |
| 0.015280278 | 2.066863706 | 1.052309193 | 3.404769963 | 0.01545995  |
| 0.111666468 | 0.088765643 | 0.082687273 | 5.478077662 | 0.11327924  |
| 0           | 2.130593925 | 0           | 3.70142635  | 0           |
| 0.018077687 | 2.403194195 | 3.667309774 | 2.411547325 | 0.018291662 |
| 0.056383339 | 0.045798436 | 0.042908027 | 6.141585204 | 0.057110917 |
| 0           | 1.152125031 | 0           | 1.144036375 | 0           |
| 0           | 1.804301228 | 2.383048133 | 0           | 0           |
| 0           | 1.166530345 | 0.664888247 | 2.762458242 | 0           |
| 0           | 1.394176358 | 0           | 1.782707157 | 0           |
| 0.322668774 | 1.907873797 | 0.217297833 | 0.387755079 | 0.329217038 |
| 4.016680117 | 1.468795291 | 0           | 3.928410759 | 5.1293833   |
| 0.089304055 | 1.294168224 | 0.06685446  | 1.953286726 | 0.090538298 |
| 0           | 0.955439798 | 0           | 4.014952782 | 0           |
| 0           | 2.009825441 | 2.235303905 | 14.01592954 | 0           |
| 0.07764067  | 0.062538242 | 1.252112702 | 3.386291383 | 0.078688514 |
| 0.066824745 | 2.603385756 | 1.218943275 | 0.075025408 | 0.067706493 |
| 0.195313013 | 0.150468124 | 0.139050992 | 2.808033195 | 1.648433549 |
| 7.380666852 | 1.328725945 | 0.074926211 | 2.784854612 | 7.444574439 |
| 0           | 0.818247884 | 2.749550005 | 2.057905796 | 0           |
| 0.464266356 | 1.77670219  | 0           | 4.357914123 | 0           |
| 0.108340006 | 0.086231585 | 1.343136593 | 3.523934913 | 0.109894713 |
| 0.206910951 | 1.626814021 | 0.146534071 | 3.722247928 | 0.210446634 |
| 0.103640527 | 1.337759597 | 0.077044009 | 5.784372938 | 0.105114248 |
| 0.099402533 | 2.392506596 | 0.074046568 | 2.439109632 | 0.100804274 |
| 0.476338799 | 1.276652379 | 0           | 3.895945258 | 0           |
| 0.119995641 | 1.386381007 | 1.376543088 | 2.522045575 | 0.1217565   |

| hsa-miR-92a-1-5p | hsa-miR-548f-3p | hsa-miR-519a-3p | hsa-miR-3691-5p | hsa-miR-4664-5p |
|------------------|-----------------|-----------------|-----------------|-----------------|
| 4.177470686      | 0.109860091     | 0.131542        | 0.093234809     | 0.092461527     |
| 2.033996468      | 0.006522372     | 0.007516724     | 0.005704132     | 1.613937059     |
| 4.94656135       | 0               | 0               | 1.611730566     | 0.787142602     |
| 4.940571257      | 0               | 1.412092074     | 2.399911022     | 1.825525194     |
| 4.614463908      | 0.014940578     | 0.01727137      | 2.394085649     | 0.012941999     |
| 3.502284047      | 0.031317932     | 0.03642171      | 1.116241337     | 1.11596898      |
| 1.773129606      | 0.208216591     | 2.945688053     | 0.172022639     | 2.348021035     |
| 2.956829013      | 0               | 0               | 0               | 2.663385557     |
| 5.029161734      | 0               | 0               | 0.770162745     | 2.265622966     |
| 4.404598024      | 0.731615999     | 0               | 2.433125343     | 1.265540695     |
| 4.048653046      | 0.109687025     | 0.13132626      | 0.09309247      | 1.38494406      |
| 5.043561493      | 0.09307992      | 0.110752892     | 0.079369994     | 0.078728986     |
| 4.444816724      | 0               | 0               | 0.952177608     | 2.742906296     |
| 2.930861904      | 1.246980668     | 0.076629971     | 1.857451844     | 0.055507648     |
| 2.760661249      | 0               | 0               | 0               | 2.766244428     |
| 3.873512615      | 0.074674964     | 2.705048537     | 0.064012079     | 1.893622291     |
| 3.593520143      | 0               | 3.895916425     | 0.710451316     | 1.231202476     |
| 3.366370107      | 0               | 0               | 2.304865927     | 2.882215141     |
| 7.169340731      | 0.12360673      | 0.148767507     | 2.074230402     | 1.429833218     |
| 2.753277956      | 0               | 0               | 0               | 0               |
| 5.453627125      | 0.357108874     | 0.47055223      | 0.284124888     | 0.280967591     |
| 3.375117861      | 0.108970497     | 0.130433346     | 1.383759048     | 0.091736854     |
| 4.400768193      | 0               | 0               | 1.858223587     | 0               |
| 6.690527986      | 0.185288094     | 0.228281153     | 2.279861676     | 0.152597853     |
| 4.944921421      | 0               | 0               | 0.866717925     | 0               |
| 3.676525815      | 0               | 0               | 1.953151055     | 2.295941859     |
| 3.056017527      | 0.009678046     | 0.011166352     | 2.369010125     | 2.045530013     |
| 3.429247153      | 0.172080206     | 0.210942862     | 2.237549698     | 1.580099246     |
| 3.862749872      | 0.048584805     | 0.056862876     | 1.791851208     | 1.791202356     |
| 3.973480973      | 0               | 0               | 1.730609017     | 3.026630035     |
| 3.771679388      | 0.113703253     | 0.136339981     | 0.096392159     | 2.037507882     |
| 4.705302759      | 0.030431692     | 6.82641209      | 2.955081696     | 1.11275772      |
| 7.122896909      | 0.055899801     | 10.17804247     | 1.821217049     | 2.248388935     |
| 5.020416299      | 0               | 3.049958166     | 0.680805206     | 0               |
| 2.210671042      | 0               | 0               | 0.755459163     | 0.755829323     |
| 4.505808952      | 0               | 1.253880093     | 2.437871949     | 0               |
| 2.452199926      | 0.092646211     | 0.110218995     | 1.329805453     | 0.078372263     |
| 4.417100011      | 0.01571644      | 0.018173429     | 0.013707031     | 1.654070813     |
| 4.336932796      | 0.042723185     | 0.049894574     | 0.036964287     | 1.156940087     |
| 6.024185554      | 0.023211943     | 0.026914521     | 0.020199084     | 2.107329326     |
| 4.281299834      | 0               | 0               | 1.813381564     | 0               |
| 4.625005811      | 0.006505696     | 1.025660242     | 2.030829152     | 1.024518817     |
| 1.442570841      | 0.116600642     | 5.804480625     | 0.098768094     | 1.407341028     |
| 4.162816921      | 1.594512181     | 0.200809299     | 2.212206099     | 0.136117168     |
| 4.429878057      | 0.138053656     | 4.728159246     | 1.477113949     | 0.115237863     |
| 3.452327758      | 0.915091854     | 0               | 1.486639296     | 0               |
| 3.68626677       | 0.232839527     | 0.292161042     | 0.19112402      | 1.756475032     |
| 3.52763293       | 0.09934284      | 0.118481758     | 0.084559953     | 1.985780467     |
| 2.58289713       | 0               | 6.397903388     | 0.854750644     | 2.607020804     |
| 4.403945533      | 0.186735621     | 0.230191902     | 0.155162085     | 0.153727534     |
| 4.491873851      | 1.331830172     | 2.770817165     | 1.946897502     | 3.397806169     |
| 2.916434785      | 0               | 0               | 1.282405699     | 0.751912136     |
| 2.563490713      | 0               | 0               | 1.92596568      | 1.682919129     |
| 4.205325175      | 0.142691298     | 0.172977074     | 0.119994674     | 0.1189496       |
| 3.483814063      | 0.028011177     | 1.109621854     | 0.024340721     | 2.128744286     |
| 3.811257936      | 0               | 0               | 0.786881386     | 0               |



|             |             |             |             |             |
|-------------|-------------|-------------|-------------|-------------|
| 3.317190435 | 0.096901727 | 0.115464982 | 0.082539209 | 1.976850723 |
| 4.782522343 | 0           | 0           | 0           | 1.81664054  |
| 2.842426213 | 0.006121757 | 0.007054002 | 1.612244867 | 2.028933005 |
| 3.091740323 | 1.658964207 | 1.062723138 | 2.074710844 | 1.655114103 |
| 1.851148015 | 0.990198425 | 0           | 2.289776956 | 1.364814863 |
| 5.028038045 | 1.294395199 | 9.285003982 | 1.90767798  | 1.906587362 |
| 4.35931243  | 0.006100628 | 3.357919911 | 3.616278037 | 3.490562031 |
| 4.355521545 | 0.630290174 | 0           | 2.274872987 | 1.137217085 |
| 4.896978824 | 0           | 0.749205945 | 0.754663334 | 0           |
| 4.089570278 | 0.000343331 | 0.000394781 | 1.5865025   | 0.000298771 |
| 2.206635784 | 1.513044036 | 0.169810721 | 0.117989412 | 1.482337201 |
| 5.304484451 | 0           | 0           | 0.907738988 | 1.882354886 |
| 3.46528141  | 0.180384773 | 0.221824249 | 0.150141337 | 0.148764596 |
| 3.948483735 | 0           | 0           | 1.424566974 | 4.058382622 |
| 1.503489341 | 0           | 4.893964151 | 1.918325264 | 2.237762563 |
| 4.212903227 | 0.036279376 | 0.042268732 | 2.165615104 | 2.165051417 |
| 3.220427752 | 0.039279124 | 0.045814254 | 0.034018868 | 1.144637061 |
| 7.417439684 | 0.203288827 | 0.252191918 | 0.168171212 | 1.672244916 |
| 3.875421883 | 0           | 0           | 0           | 2.562348645 |
| 4.821727859 | 0           | 0           | 0.819475615 | 0.819774197 |
| 2.487587925 | 0.031055616 | 1.121405485 | 2.957976929 | 0.026766781 |
| 6.578471246 | 2.226501971 | 0.188277527 | 0.129595105 | 0.128447305 |
| 3.949032936 | 0           | 0           | 0           | 2.115192581 |
| 5.028262593 | 0.046473679 | 0.054349704 | 1.170692816 | 1.782676345 |
| 4.540340956 | 0.138397629 | 0.167500178 | 0.116522085 | 2.895484116 |
| 3.556721016 | 0           | 0           | 2.29884147  | 2.976124325 |
| 4.171668457 | 0           | 0           | 2.464742704 | 2.972842625 |
| 4.754265808 | 0.018184238 | 0.021046029 | 2.409363051 | 2.409057137 |
| 2.788968035 | 0           | 0           | 2.359717789 | 0.937218594 |
| 4.627209281 | 0           | 0           | 0.808084245 | 1.353423136 |
| 5.518400265 | 0.101339474 | 0.120953312 | 1.35868088  | 1.357629945 |
| 4.824524703 | 1.826974969 | 0           | 2.313355204 | 0.661461976 |
| 4.840078902 | 0.259308772 | 0.32873653  | 1.832990535 | 2.498028297 |
| 4.172222994 | 0.000373598 | 0.000429589 | 0.000327334 | 0.000325107 |
| 3.820346235 | 0.208485391 | 1.774792008 | 0.172232449 | 0.170595953 |
| 2.752560971 | 0.160859155 | 1.604668025 | 2.200899498 | 1.546115765 |
| 1.830983342 | 0           | 0           | 0           | 1.439546272 |
| 2.654518784 | 0.012461539 | 5.324084158 | 2.058601965 | 2.38210997  |
| 3.319194327 | 1.21902943  | 0.705159365 | 1.922442671 | 4.425880389 |
| 2.870854164 | 0.57720772  | 0           | 2.941771649 | 1.068101365 |
| 3.472302706 | 0           | 0           | 0           | 0           |
| 2.710717504 | 1.28560504  | 5.855846729 | 0.064832388 | 0.064323705 |
| 3.125044706 | 0           | 0.970174228 | 2.546768523 | 0           |
| 5.918719031 | 0.01815289  | 0.021009506 | 1.068000367 | 0.015708829 |
| 3.616998641 | 0           | 0           | 2.845125756 | 2.982135855 |
| 4.035935747 | 2.080014473 | 0           | 0           | 0           |
| 6.026713579 | 0           | 0           | 2.570840276 | 1.572387959 |
| 2.909257624 | 0.741452573 | 1.262382817 | 1.667436225 | 2.231876795 |
| 4.299297727 | 0           | 0.504974312 | 3.020090458 | 2.917702514 |
| 2.498254466 | 0           | 0.3979495   | 1.420366877 | 2.697815655 |
| 3.868004528 | 0.010083428 | 0.011635798 | 2.047563328 | 2.37078652  |
| 1.325607824 | 0           | 0.52584296  | 0           | 0           |
| 5.418969764 | 0           | 0           | 1.446107303 | 0           |
| 4.905773116 | 5.043133569 | 0.88820995  | 2.65888752  | 2.850798378 |
| 2.606230557 | 0           | 4.947940551 | 1.842327612 | 1.541644642 |
| 4.077103644 | 1.049851316 | 0.014768712 | 1.048076229 | 0.011082876 |
| 5.171626121 | 1.08122399  | 4.372852685 | 2.097336551 | 0.018088959 |
| 3.131763654 | 0           | 0           | 0.799132658 | 2.050812872 |

|             |             |             |             |             |
|-------------|-------------|-------------|-------------|-------------|
| 3.88266394  | 0.22330981  | 0.27917306  | 2.397025727 | 0.181981838 |
| 3.00472721  | 0           | 0           | 0.321032791 | 0           |
| 4.729179802 | 0           | 0           | 1.361405705 | 0.815261065 |
| 1.863257382 | 0           | 0.431551056 | 1.715680628 | 1.48222571  |
| 2.126763153 | 0.024692244 | 1.096747556 | 0.021477804 | 0.021324256 |
| 4.293101134 | 0.087705309 | 1.336525889 | 0.07490163  | 0.074301992 |
| 3.363998438 | 0           | 1.113948881 | 3.026403108 | 1.506480498 |
| 3.109531516 | 0           | 0           | 0.427234441 | 0.42773527  |
| 2.026547162 | 0.005086909 | 0.00585935  | 0.004450668 | 1.019191151 |
| 4.061727001 | 1.783807966 | 0.051347134 | 1.77300602  | 3.380542642 |
| 4.86260909  | 0.058592186 | 0.06882937  | 3.080985377 | 1.212871102 |
| 3.368616612 | 0.03490169  | 8.613246512 | 0.030266646 | 2.159052336 |
| 4.130645648 | 1.290968685 | 0.091231949 | 1.904069151 | 1.27667968  |
| 3.748678464 | 0.008030236 | 0.009259563 | 1.620674565 | 1.030231541 |
| 2.941096647 | 1.092177159 | 0.027576809 | 1.088722088 | 0.02054071  |
| 3.368653017 | 0.067492252 | 0.079546207 | 1.24435474  | 2.295877299 |
| 2.96281762  | 0.694709388 | 0           | 2.161049156 | 1.603977416 |
| 3.685532688 | 4.016823527 | 0.045904681 | 3.189846765 | 1.144910699 |
| 2.418383144 | 0           | 0           | 0           | 1.520323123 |
| 3.628862453 | 0           | 0.679972335 | 0           | 2.353569029 |
| 1.221780031 | 0.057412253 | 0.067413852 | 0.049460658 | 1.208754606 |
| 4.402087106 | 0.60986616  | 5.501174747 | 3.11280294  | 0           |
| 2.773477713 | 0.034504663 | 0.040174801 | 1.734074962 | 1.12748289  |
| 5.998251459 | 0.03614897  | 0.042114777 | 2.165045992 | 2.491008849 |
| 5.673491509 | 0.133019859 | 0.160665235 | 2.10699808  | 2.10501752  |
| 3.423686645 | 0.017403761 | 0.020136966 | 0.015170985 | 1.065083565 |
| 3.610144122 | 0           | 0.941886546 | 2.73142958  | 0           |
| 2.461281401 | 0           | 0           | 2.173827573 | 0.576770848 |
| 4.465675362 | 1.003960817 | 3.591024423 | 2.32689939  | 0.00087833  |
| 4.79301692  | 0.247858518 | 0.312823347 | 0.202660141 | 0.200643351 |
| 4.571557968 | 0.168910756 | 0.206807913 | 0.141028088 | 0.139754413 |
| 4.338768491 | 0           | 0           | 1.990840998 | 3.453322073 |
| 4.944115269 | 0.014072798 | 0.016263048 | 2.389975589 | 1.05275197  |
| 4.006382205 | 0.101052832 | 0.120598262 | 1.357734006 | 0.085270566 |
| 2.933261383 | 0           | 0           | 1.197278662 | 0.684825937 |
| 7.091234475 | 0.016640535 | 0.019248499 | 1.65826914  | 0.014406897 |
| 2.259060927 | 0.05153696  | 0.060383798 | 0.044475147 | 2.230187992 |
| 3.484925627 | 0           | 0           | 1.532651301 | 2.085548169 |
| 2.102243649 | 0.8459033   | 0           | 2.121159316 | 1.404989411 |
| 5.664594849 | 0           | 0           | 0.662712886 | 1.170211782 |
| 1.385324604 | 0           | 0.838403061 | 1.39584131  | 1.396278127 |
| 4.800807873 | 0.281526716 | 0.360016892 | 0.228214651 | 1.889434028 |
| 1.462705977 | 0           | 5.593936914 | 1.876809706 | 0           |
| 5.160136618 | 0.081141629 | 0.096119367 | 1.291079094 | 0.068876552 |
| 4.68181399  | 0           | 0           | 0.955767999 | 0           |
| 3.13096099  | 0           | 0           | 0           | 0           |
| 1.271940634 | 0.070693273 | 0.083417906 | 0.060668477 | 0.060196484 |
| 3.335022774 | 2.289044518 | 1.86732497  | 2.599230868 | 0.052065676 |
| 4.049939594 | 0.174155205 | 1.652466792 | 1.588383227 | 2.68295742  |
| 5.906937991 | 0.091258823 | 9.434958313 | 0.077857473 | 1.324240263 |
| 2.5269118   | 0           | 0           | 2.07849768  | 0.819667036 |
| 4.674452038 | 0.901319709 | 0           | 1.989063242 | 2.732990988 |
| 4.119599698 | 1.366269196 | 0.116946427 | 1.347962592 | 1.981242929 |
| 6.815651577 | 0.184124862 | 0.226747193 | 1.61826552  | 1.616066986 |
| 4.324525002 | 4.716445857 | 0.111793565 | 0.080071278 | 0.079423721 |
| 2.440776497 | 0.090152867 | 0.107153018 | 1.321462471 | 1.320549678 |
| 4.24478902  | 0           | 0           | 1.565649367 | 3.162955815 |
| 4.98824955  | 0.108428602 | 1.413466485 | 1.381986386 | 1.380845524 |

| hsa-miR-518c-3p | hsa-miR-6716-3p | hsa-miR-154-3p | hsa-miR-141-3p | hsa-miR-515-3p |
|-----------------|-----------------|----------------|----------------|----------------|
| 0.133105264     | 2.016977318     | 5.365450687    | 3.580027786    | 0.129509647    |
| 0.007585425     | 0.005498997     | 2.621600653    | 2.621373225    | 0.007426824    |
| 0               | 2.158001157     | 4.209664863    | 3.394685545    | 0              |
| 1.810984939     | 1.82760823      | 3.104076739    | 3.584374607    | 2.123514776    |
| 0.017432943     | 0.012556757     | 0.017735126    | 2.076466906    | 0.017060046    |
| 0.036777832     | 1.114780663     | 3.177544263    | 2.158221258    | 0.035956391    |
| 0.262605072     | 0.163593419     | 1.770600566    | 3.30199836     | 0.253875645    |
| 0               | 1.716370634     | 3.058760307    | 3.81369799     | 0              |
| 0               | 0               | 1.293409787    | 2.801157119    | 0              |
| 1.932870229     | 1.658501882     | 3.555274473    | 3.872155097    | 0              |
| 0.132886331     | 0.089088953     | 3.91095458     | 7.445358799    | 0.129298035    |
| 0.112017995     | 0.076042169     | 3.828864438    | 4.847137225    | 0.10910633     |
| 0               | 0               | 2.513395852    | 1.525178742    | 0              |
| 1.885553949     | 0.053697536     | 1.249614603    | 3.158773325    | 0.075564186    |
| 0               | 0.969705438     | 3.121926424    | 3.857159371    | 0              |
| 3.207275448     | 0.061406193     | 1.927101752    | 1.281055996    | 0.086990467    |
| 4.355177198     | 1.234274577     | 3.317762862    | 3.102146749    | 2.981712405    |
| 0               | 0               | 0              | 4.239548394    | 0              |
| 0.150592427     | 1.42406868      | 7.772500462    | 6.182784158    | 0.146397197    |
| 0               | 2.276345655     | 3.528116047    | 1.951517902    | 0.963096161    |
| 0.479738267     | 0.267955449     | 0.497482091    | 5.601292716    | 0.458838082    |
| 0.131980223     | 2.448548681     | 2.075066913    | 4.177927041    | 0.128422177    |
| 0               | 1.454337605     | 10.31195915    | 2.638200454    | 0              |
| 0.231486236     | 2.264774971     | 3.490087061    | 3.725402966    | 0.224136402    |
| 0               | 1.42696967      | 6.702072628    | 2.791914533    | 0              |
| 0.450579466     | 2.705106018     | 2.817947476    | 8.504060036    | 0.873277805    |
| 0.011269309     | 1.627285534     | 2.050232813    | 13.17113021    | 0.011031651    |
| 0.213822761     | 2.223657261     | 1.641663528    | 3.147716659    | 0.20721504     |
| 0.057444551     | 0.040329753     | 1.187334811    | 3.864076371    | 0.056103649    |
| 0               | 0.795339964     | 2.987049743    | 3.464335029    | 0              |
| 0.137974796     | 0.092221906     | 2.095114378    | 3.598564033    | 0.134215159    |
| 8.078581154     | 1.111605951     | 0.036370844    | 2.153849316    | 6.409772329    |
| 9.941868053     | 0.046278743     | 1.215034427    | 5.084718565    | 10.07484263    |
| 3.049000033     | 1.579574827     | 3.047950551    | 3.695472307    | 2.486203383    |
| 0               | 0               | 1.657924647    | 3.831306023    | 0              |
| 1.254357769     | 0               | 3.646878498    | 2.587952374    | 0.734584984    |
| 0.111476695     | 1.324785564     | 0.113843269    | 2.448235723    | 0.108582023    |
| 2.08129143      | 1.058274985     | 3.090536641    | 4.851825032    | 1.061894767    |
| 0.050397282     | 1.155267169     | 2.816845398    | 4.05650891     | 0.049238181    |
| 0.027172034     | 1.684917936     | 2.119151175    | 5.142536118    | 0.026577883    |
| 0               | 0.856740155     | 2.939867714    | 2.773887845    | 0              |
| 0.007565981     | 1.024290023     | 1.616061929    | 0.00785657     | 0.007407794    |
| 6.34076941      | 0.094476767     | 0.144841521    | 2.900770375    | 5.211391685    |
| 0.203505412     | 0.130975487     | 0.20861028     | 4.170367387    | 0.197317413    |
| 5.197044107     | 1.468983885     | 1.518905111    | 4.190072003    | 4.418514815    |
| 0               | 1.487952117     | 2.461278698    | 2.681659399    | 0              |
| 0.296681618     | 1.743929091     | 1.85779339     | 3.691641723    | 0.286336119    |
| 0.119855461     | 1.979681425     | 3.099464329    | 4.00144691     | 0.116694591    |
| 7.67138113      | 1.815272036     | 4.148694501    | 2.36698972     | 6.483728543    |
| 0.233433652     | 0.147753184     | 1.694112773    | 5.440886567    | 0.226000182    |
| 1.988034517     | 0.072383958     | 3.046967445    | 3.475001086    | 0.103526111    |
| 0               | 2.242523228     | 2.417937942    | 3.580376416    | 0              |
| 0               | 3.012054577     | 3.591091018    | 4.465322984    | 0              |
| 0.175192163     | 3.168584676     | 4.338444578    | 5.687052644    | 0.170103789    |
| 1.717398352     | 0.023427935     | 1.108751693    | 2.738170841    | 0.032124411    |
| 0               | 0               | 2.260340155    | 3.1115242      | 0              |

|             |             |             |             |             |
|-------------|-------------|-------------|-------------|-------------|
| 0.116795979 | 1.338685466 | 0.119301361 | 2.018399857 | 0.113733095 |
| 0           | 1.520847085 | 1.490520562 | 11.75853164 | 0           |
| 0.007118402 | 1.022863143 | 4.845398073 | 4.125001252 | 0.006969728 |
| 2.673679871 | 1.059159766 | 1.660762018 | 4.003028135 | 0.018227909 |
| 0           | 2.610806869 | 4.317808687 | 8.825219182 | 0           |
| 9.677146006 | 1.276558186 | 9.578954308 | 4.247368266 | 8.628306247 |
| 3.844172034 | 2.028443015 | 0.007213717 | 4.430066126 | 2.355132449 |
| 0           | 0.639678968 | 7.711477502 | 3.754645385 | 0           |
| 0.749791098 | 0.756682726 | 5.909289013 | 5.183944101 | 0           |
| 0.000398328 | 2.001613213 | 2.586903209 | 4.461574688 | 0.000390139 |
| 0.171973289 | 2.120624305 | 2.205906182 | 3.007551992 | 0.167005078 |
| 0           | 0           | 2.856024779 | 5.091494038 | 0           |
| 0.224906647 | 2.249613274 | 1.671412476 | 5.271728924 | 0.217836719 |
| 0           | 1.426602206 | 3.243510423 | 3.77893913  | 0           |
| 5.416533594 | 1.919597019 | 4.14216163  | 5.249090925 | 3.896408286 |
| 0.042687484 | 0.030250982 | 1.755036779 | 4.609202231 | 0.041721745 |
| 0.04627172  | 1.143113232 | 3.812647926 | 3.024375758 | 0.045216807 |
| 0.255867731 | 0.159978543 | 2.460861012 | 4.345747603 | 0.24744479  |
| 0           | 0           | 4.161580478 | 5.088169339 | 0           |
| 0           | 1.369617552 | 2.71497172  | 3.785339943 | 0           |
| 3.347229902 | 1.113841425 | 1.120445837 | 4.508311657 | 2.754267105 |
| 0.190752748 | 0.123656846 | 0.195435271 | 3.967825532 | 0.185069512 |
| 0           | 1.565119894 | 3.342540643 | 4.804206722 | 0           |
| 0.054902652 | 1.168432613 | 3.586254163 | 2.564840342 | 0.05362788  |
| 0.169624703 | 2.114590593 | 4.318224676 | 2.651381826 | 0.164743541 |
| 0           | 2.299244689 | 1.975564649 | 3.971198795 | 0           |
| 0           | 0.760436712 | 2.615101638 | 7.587162089 | 0           |
| 0.021244667 | 0.015264422 | 6.112502829 | 3.808816656 | 0.020786277 |
| 0           | 2.650466903 | 2.137179897 | 5.110970195 | 0           |
| 0           | 0           | 7.158177765 | 2.510737241 | 0           |
| 0.122362304 | 1.986819229 | 2.491753082 | 4.468227036 | 0.119120477 |
| 0           | 0           | 0.65843062  | 10.85473428 | 0           |
| 1.953703264 | 2.480357253 | 0.344331627 | 3.513439854 | 0.321847711 |
| 0.000433448 | 1.001401358 | 3.702712398 | 5.556965275 | 0.000424537 |
| 0.262973366 | 0.163790284 | 0.270232001 | 4.030779036 | 0.25422706  |
| 0.198964559 | 0.128381403 | 2.753405427 | 5.320642251 | 1.604724684 |
| 0           | 0           | 1.431037606 | 2.810470893 | 0           |
| 5.03054526  | 0.010482954 | 3.982173782 | 2.878010168 | 5.535124167 |
| 0           | 0           | 8.110564778 | 4.2498471   | 0.704452367 |
| 0.580497271 | 1.736853029 | 4.41549829  | 10.61034753 | 0           |
| 0           | 2.397624957 | 4.088247743 | 3.855265655 | 0           |
| 5.237768641 | 2.323342211 | 4.678771963 | 4.755741975 | 4.326113818 |
| 0           | 0           | 0.970419934 | 3.413810808 | 0           |
| 0.021207782 | 0.015238285 | 4.969206922 | 0.022049954 | 0.020750227 |
| 0           | 0           | 4.822912579 | 3.449875306 | 0.672789649 |
| 0           | 1.381662277 | 4.663306675 | 5.658140062 | 0           |
| 0           | 1.986782387 | 8.513508646 | 4.374796277 | 0           |
| 2.596918454 | 0.74939163  | 2.761172131 | 3.739968651 | 0.741231269 |
| 0.506105219 | 1.326866468 | 0.95456125  | 1.578020799 | 0.503767819 |
| 0.399265665 | 2.597847293 | 4.194060634 | 4.259480225 | 0           |
| 0.011743204 | 0.008489976 | 1.633047536 | 3.381411105 | 0.01149528  |
| 0           | 1.650036065 | 0           | 2.650443112 | 0           |
| 0           | 0.885240964 | 7.020944687 | 4.390208045 | 0           |
| 0           | 2.180587833 | 10.14375541 | 3.28552296  | 0           |
| 5.454791059 | 1.16646148  | 2.444203088 | 2.447411376 | 4.528415582 |
| 0.014906057 | 1.640676428 | 2.391252481 | 5.634666186 | 0.014589053 |
| 4.82688298  | 1.675287414 | 6.923716442 | 3.824756197 | 4.211221692 |
| 0           | 1.741779974 | 2.847694953 | 3.473939442 | 0           |

|             |             |             |             |             |
|-------------|-------------|-------------|-------------|-------------|
| 0.283411164 | 2.378467383 | 2.539675308 | 3.890197966 | 0.273708087 |
| 0           | 2.82348403  | 3.415001275 | 5.137857916 | 0           |
| 0           | 0           | 3.777565233 | 2.521611868 | 0           |
| 0.432814477 | 2.270233074 | 3.123008791 | 3.967350572 | 0           |
| 1.096550171 | 0.020677425 | 2.72122968  | 2.453383854 | 1.096920532 |
| 1.984777212 | 1.937526896 | 1.334142553 | 4.07086218  | 0.102619784 |
| 2.012388344 | 2.275621891 | 3.811940212 | 2.710762367 | 0           |
| 0           | 0.859796386 | 5.297980103 | 1.44201687  | 0.423621607 |
| 0.005912689 | 1.019013089 | 3.489881037 | 6.098402988 | 1.020114122 |
| 0.051866125 | 0.036541834 | 1.790001873 | 5.351470402 | 0.05066953  |
| 0.069551672 | 0.048460493 | 9.663984613 | 4.588909493 | 0.067887182 |
| 8.709383804 | 1.127576008 | 3.001806597 | 3.522533646 | 8.261548738 |
| 0.092234593 | 2.329090994 | 4.761190154 | 13.510681   | 0.089925624 |
| 1.62344635  | 2.037342786 | 2.041737595 | 4.573298288 | 0.009148363 |
| 0.027841061 | 1.687291065 | 1.092452728 | 3.306891425 | 0.027231371 |
| 0.080399839 | 1.240895226 | 3.837868717 | 4.292349892 | 0.078433339 |
| 0.696268029 | 1.608012709 | 3.196642178 | 4.602046723 | 0           |
| 3.025134613 | 1.143383587 | 2.199478044 | 3.929774684 | 2.199255474 |
| 0           | 1.826300691 | 2.857222979 | 2.727869732 | 0           |
| 1.183166983 | 0.68783899  | 1.184976833 | 4.689881384 | 0           |
| 0.068119188 | 0.047504863 | 1.22074661  | 2.284484719 | 0.066493726 |
| 6.971434423 | 0.619409451 | 3.417719677 | 6.678076224 | 5.853769828 |
| 1.747408144 | 0.028789941 | 2.505424397 | 4.204353785 | 0.039657282 |
| 0.04253186  | 0.030143689 | 1.139958191 | 4.608453178 | 1.141301833 |
| 0.162678625 | 0.10717172  | 7.300566779 | 6.784923091 | 0.158051824 |
| 0.020326621 | 1.660400801 | 4.353459856 | 4.565873733 | 0.019888951 |
| 0           | 1.929894458 | 2.501044325 | 4.430438507 | 0           |
| 0           | 1.061368214 | 2.46139093  | 3.88128272  | 0           |
| 4.813621321 | 0.000852906 | 2.59066512  | 2.813146573 | 4.254072496 |
| 0.317809159 | 0.192277214 | 0.327325556 | 0.339788165 | 0.306406516 |
| 0.20961226  | 1.562100729 | 0.214924298 | 4.191472827 | 0.203177053 |
| 0           | 1.685852975 | 2.214436401 | 5.595229246 | 0           |
| 0.016414826 | 0.011831264 | 3.081208929 | 3.404586427 | 0.016064524 |
| 0.122002169 | 1.985796178 | 1.383539264 | 4.466776897 | 0.118772009 |
| 0           | 0           | 2.307529314 | 4.649693419 | 0           |
| 0.019429407 | 0.01397662  | 2.677507994 | 3.799785545 | 0.019011909 |
| 0.061006191 | 0.042734392 | 1.824303512 | 4.205848388 | 0.059571574 |
| 0           | 1.159328708 | 0.649126286 | 3.484255831 | 0           |
| 0           | 1.406820074 | 2.76424911  | 6.826605217 | 0           |
| 0           | 2.3235408   | 2.615871069 | 6.606205867 | 0           |
| 0           | 0           | 0.839753445 | 2.920618705 | 0           |
| 0.366138676 | 0.216106799 | 0.377864195 | 3.892938896 | 0.352159416 |
| 6.605908303 | 1.471394213 | 2.659424145 | 2.182861407 | 6.029781973 |
| 0.097186132 | 0.066570112 | 1.309729672 | 1.95098572  | 0.094729861 |
| 0           | 0.956236803 | 2.518790536 | 4.09728108  | 0           |
| 0           | 3.573806984 | 3.226331244 | 2.523130985 | 0           |
| 0.084320237 | 0.05821491  | 2.350181166 | 2.957695718 | 0.08224179  |
| 0.072436137 | 0.050379623 | 2.910618704 | 4.81519291  | 0.070692456 |
| 2.344703538 | 1.577561957 | 4.055090534 | 4.35798341  | 2.34170788  |
| 9.334335592 | 1.950499915 | 8.309597722 | 5.98438091  | 9.198520725 |
| 0           | 2.082256965 | 3.402710696 | 11.70488968 | 0           |
| 0           | 0           | 2.403787476 | 5.197693653 | 0           |
| 0.118298345 | 0.08000259  | 0.12084336  | 2.472976935 | 0.115187457 |
| 0.22992296  | 0.145813273 | 3.720389591 | 5.360612724 | 0.222640003 |
| 0.113073136 | 2.393124583 | 4.428459351 | 3.677243544 | 0.110128266 |
| 0.108368446 | 1.316602891 | 0.110655009 | 3.955137498 | 0.105570804 |
| 0.481550155 | 0           | 6.530537241 | 3.306786108 | 0           |
| 1.412869032 | 0.088105521 | 1.410699894 | 5.06482001  | 1.413815293 |

| hsa-miR-373-3p | hsa-miR-526b-3p | hsa-miR-6715b-3p | hsa-miR-337-5p | hsa-miR-3117-3p |
|----------------|-----------------|------------------|----------------|-----------------|
| 0.135695904    | 0.101805939     | 0.134555958      | 0.073539709    | 1.393420925     |
| 0.007698425    | 0.006132305     | 3.498340923      | 0.004666159    | 1.024931736     |
| 0              | 0               | 2.558199788      | 0.817474248    | 1.372998396     |
| 0              | 0               | 2.954320202      | 0.871843686    | 1.419662401     |
| 0.017698851    | 0.014030184     | 0.017582128      | 0.010627865    | 0.013584733     |
| 0.03736458     | 0.029341226     | 0.03710692       | 0.022035436    | 1.117801561     |
| 0.268971542    | 0.190422508     | 2.480575418      | 0.131663902    | 0.182066505     |
| 0              | 0               | 0                | 1.078155329    | 1.945587884     |
| 0              | 0               | 3.521836643      | 0              | 0.768179598     |
| 3.026074997    | 0               | 1.93310209       | 0.750408046    | 2.614902795     |
| 0.135471645    | 0.101647972     | 3.147852568      | 0.073431595    | 1.392842382     |
| 0.11411181     | 0.086455216     | 4.688216441      | 0.062952369    | 1.336762064     |
| 0              | 0               | 4.505990322      | 0              | 0               |
| 0.078797356    | 0.06067998      | 2.323849979      | 0.044794373    | 0.058551971     |
| 0              | 0               | 3.535969837      | 0              | 0               |
| 3.208588715    | 1.276431123     | 2.706162232      | 0.051089331    | 1.273270698     |
| 0              | 1.911374941     | 1.216083303      | 0              | 1.61095834      |
| 0.794074021    | 0               | 1.327797845      | 0              | 0               |
| 0.153619959    | 0.114329871     | 2.935580518      | 3.640317891    | 0.109895186     |
| 0              | 0               | 0                | 1.54614752     | 1.542240807     |
| 0.495311955    | 0.320474327     | 2.294722698      | 0.209211613    | 0.30378218      |
| 0.134543529    | 0.100993875     | 1.413995918      | 1.350692862    | 0.097168841     |
| 3.28144609     | 0               | 4.064828795      | 5.476630488    | 0.888349        |
| 2.389399253    | 0.16996694      | 0.234473884      | 0.118671529    | 0.162737678     |
| 0              | 0               | 4.68223445       | 0.874232014    | 0               |
| 0              | 0               | 3.163374188      | 0.469963468    | 1.224467533     |
| 0.011438689    | 0.009095151     | 3.642800806      | 0.006908933    | 1.628620611     |
| 0.218619535    | 0.158128734     | 2.336619713      | 0.111041101    | 0.151527474     |
| 1.187502643    | 0.045407483     | 1.811426848      | 0.033799674    | 1.18074173      |
| 0              | 0               | 2.838584785      | 0              | 0.791704718     |
| 0.140684824    | 0.105311927     | 1.431415895      | 0.075934848    | 1.406237533     |
| 4.706210247    | 2.961205186     | 2.155475878      | 0.021424443    | 0.027579545     |
| 3.112712257    | 6.754903826     | 4.571485442      | 0.038705001    | 2.850747589     |
| 0              | 0.676752479     | 2.091283497      | 0.695305737    | 1.188451561     |
| 0              | 0               | 2.922915766      | 0              | 1.283781495     |
| 2.750012783    | 0               | 3.267359047      | 1.994826104    | 0               |
| 1.352772497    | 0.086057526     | 5.379141531      | 0.062675878    | 0.082887011     |
| 0.018624209    | 0.014757137     | 5.003151722      | 0.011173927    | 1.059716876     |
| 0.051226211    | 0.039962161     | 0.050862099      | 0.02983557     | 1.771303298     |
| 0.027596075    | 0.021771888     | 1.090579056      | 2.097611693    | 1.087769221     |
| 0.852184913    | 0               | 2.110205938      | 0              | 1.408755529     |
| 0.007678687    | 0.006116641     | 2.357427314      | 1.022956047    | 2.354352999     |
| 1.44105964     | 3.534099612     | 1.4420616        | 0.077733389    | 0.103812522     |
| 0.20799313     | 0.15113571      | 1.615460004      | 0.106494145    | 1.569708042     |
| 6.480295405    | 3.789751482     | 4.824989469      | 0.090862796    | 0.122385201     |
| 0              | 0               | 1.480450201      | 1.494004122    | 0               |
| 0.304251515    | 0.212257625     | 3.050418974      | 1.679680488    | 0.20264168      |
| 0.122130106    | 0.092192786     | 0.121129491      | 1.947503288    | 4.36662546      |
| 7.026462767    | 4.95285385      | 4.841457334      | 0.862836251    | 1.407975994     |
| 0.238839896    | 0.171261904     | 3.728972578      | 0.119501183    | 1.639250197     |
| 0.108222221    | 0.082214204     | 2.433053671      | 0.059998011    | 0.079207227     |
| 0              | 0               | 1.268826431      | 3.47924299     | 0.749453547     |
| 0              | 0               | 1.012931394      | 0              | 1.38260928      |
| 0.178872632    | 0.131640874     | 0.17725165       | 1.446500054    | 1.501061173     |
| 0.033371308    | 0.026255486     | 2.143386376      | 0.019752048    | 1.105588113     |
| 0              | 0               | 1.314042128      | 0.797888339    | 0.784996433     |

|             |             |             |             |             |
|-------------|-------------|-------------|-------------|-------------|
| 1.368530461 | 0.089957601 | 3.317782039 | 0.065382519 | 0.086619086 |
| 0           | 0           | 2.852335755 | 1.852668185 | 1.134885994 |
| 0.007224325 | 0.005755979 | 3.035597202 | 2.026407909 | 0.005576667 |
| 1.062273863 | 0.014983388 | 3.262712539 | 0.011343788 | 5.17059415  |
| 0           | 0           | 2.889919393 | 1.033651217 | 0.999521464 |
| 5.941553696 | 7.159243907 | 3.891688487 | 3.901790167 | 2.946224626 |
| 1.023891763 | 2.839246302 | 0.007153001 | 0.004365692 | 3.201712788 |
| 3.537106023 | 0           | 1.777436839 | 3.085087615 | 4.014678634 |
| 5.779568987 | 0           | 2.209456663 | 0.766868172 | 0           |
| 1.586611744 | 0.000323084 | 2.323812634 | 0.00024666  | 1.586526635 |
| 0.175565765 | 0.129395749 | 2.664239636 | 0.092165033 | 0.124244007 |
| 0           | 0           | 3.311406651 | 0           | 0           |
| 0.230044336 | 0.16557682  | 3.701305203 | 0.115851544 | 1.619739634 |
| 0           | 0           | 3.588281673 | 0           | 1.422383513 |
| 3.70311339  | 3.229708989 | 3.069026553 | 1.514339258 | 1.916931426 |
| 0.043377661 | 0.033965666 | 0.043074545 | 0.025442875 | 1.136029375 |
| 0.047025864 | 0.036758528 | 2.798719768 | 1.13443766  | 1.756869574 |
| 0.262006715 | 0.186036322 | 2.461142659 | 0.128898112 | 0.177926322 |
| 0           | 0           | 1.361067969 | 0           | 0           |
| 0           | 0           | 2.881376353 | 0           | 1.364174212 |
| 1.120554357 | 0.029096548 | 1.731328111 | 0.021854664 | 0.028141296 |
| 0.194869466 | 0.142410784 | 6.251876315 | 0.100779029 | 1.53914506  |
| 0           | 0           | 2.284120194 | 0           | 0.6681252   |
| 0.055814665 | 0.04344732  | 2.234488575 | 0.03237541  | 1.173120617 |
| 0.173153464 | 0.127753871 | 2.199059559 | 0.091070674 | 0.122681722 |
| 0.981714174 | 0           | 0.981667459 | 0           | 2.975505167 |
| 0           | 0           | 2.429008896 | 0.770508738 | 1.287549208 |
| 7.210700278 | 0.017068303 | 2.910281792 | 1.658239861 | 0.016522661 |
| 0           | 0           | 0           | 1.325940193 | 1.561811048 |
| 0.80454125  | 0           | 2.293212643 | 0           | 0           |
| 1.384928359 | 0.094019888 | 1.385825856 | 1.328265054 | 1.364794138 |
| 0           | 0           | 1.152314845 | 0           | 0           |
| 0.343087337 | 0.235580731 | 3.512104549 | 0.159532128 | 0.224555026 |
| 0.000439793 | 0.000351565 | 0.000437009 | 2.001625863 | 1.001433841 |
| 0.26935237  | 0.190661609 | 4.857906518 | 0.131814361 | 0.182292127 |
| 4.293140396 | 1.567301287 | 3.381149674 | 1.496027174 | 4.150556523 |
| 0           | 0           | 0.875197025 | 0           | 1.437185517 |
| 1.644328438 | 2.06054255  | 6.362742677 | 1.04372596  | 2.383545348 |
| 10.34522353 | 0           | 3.824312392 | 3.197766843 | 0.708440416 |
| 0           | 0           | 1.407925002 | 1.470067263 | 1.427883084 |
| 0           | 0           | 3.233652662 | 1.429073943 | 0.858915205 |
| 1.289506674 | 2.942679916 | 2.37365875  | 0.051726646 | 2.337062544 |
| 0           | 0           | 5.23772888  | 0           | 0           |
| 0.021534166 | 0.017038954 | 1.07096379  | 1.063357429 | 0.016494287 |
| 0           | 0           | 2.644425966 | 1.601657777 | 1.56632936  |
| 0           | 0           | 0           | 2.371601174 | 0           |
| 6.815057384 | 0           | 3.6833697   | 2.794522514 | 0.989227575 |
| 0.743772747 | 0           | 3.481651569 | 0.75979351  | 1.27348954  |
| 4.667027054 | 0           | 7.427027367 | 0           | 0           |
| 0.401987413 | 0           | 1.384678354 | 0.417662666 | 0.811158056 |
| 0.011919908 | 0.009475568 | 0.011842351 | 0.007196349 | 0.009177836 |
| 0           | 0           | 0.980962815 | 0           | 0.527158361 |
| 0           | 0           | 0.880980742 | 1.863444454 | 0           |
| 0           | 0           | 0           | 2.673244519 | 3.429427789 |
| 1.809313957 | 2.926815878 | 3.859808718 | 1.186912655 | 0           |
| 0.015132059 | 0.012010333 | 1.645954757 | 1.044849854 | 2.872455177 |
| 0.024848172 | 2.100643507 | 1.081706445 | 2.088275334 | 1.678244441 |
| 0           | 0           | 1.329686877 | 0           | 1.338756216 |

|             |             |             |             |             |
|-------------|-------------|-------------|-------------|-------------|
| 0.290501896 | 0.203822916 | 4.087456354 | 0.140047537 | 2.418364627 |
| 0           | 0           | 1.455689472 | 0           | 1.008559235 |
| 1.742140818 | 0           | 3.281772196 | 0.824821104 | 2.733809796 |
| 0           | 0.429431406 | 1.178161342 | 0.8950408   | 2.520054012 |
| 0.029374852 | 0.023155482 | 1.701820537 | 0.017450204 | 0.022405125 |
| 12.41988134 | 0.081523637 | 0.106411768 | 1.287466342 | 0.078545832 |
| 0           | 0           | 3.2728604   | 0.648382695 | 1.499317412 |
| 0           | 0           | 5.866196484 | 2.593918466 | 0           |
| 1.019929158 | 0.004783673 | 4.031012558 | 0.003642775 | 1.608020927 |
| 0.052721979 | 0.041099927 | 1.790399151 | 0.030665787 | 0.039715449 |
| 2.627351749 | 0.05468357  | 2.627306202 | 3.566589791 | 1.216592071 |
| 3.661510426 | 6.288433297 | 1.13564764  | 0.024498922 | 1.130979548 |
| 0.093892029 | 0.071799557 | 3.220423752 | 1.255158752 | 0.069225621 |
| 1.623333091 | 0.007548364 | 4.57293513  | 1.617761944 | 1.030665301 |
| 1.092536136 | 0.022301205 | 3.840884852 | 0.016814479 | 0.021579897 |
| 0.081809941 | 0.062911623 | 1.896006626 | 0.046385979 | 1.248098202 |
| 0.697821192 | 0           | 4.431603862 | 0           | 0.698789507 |
| 2.530378506 | 0.036829647 | 2.199662488 | 0.027544467 | 0.035600199 |
| 0           | 0           | 0           | 0           | 0           |
| 0           | 0           | 1.183935694 | 0.699867081 | 0.683114652 |
| 2.287180123 | 0.053591203 | 0.068771861 | 0.039713531 | 0.051738553 |
| 3.042574594 | 5.189042873 | 0           | 0           | 2.58250329  |
| 0.041223793 | 0.032312242 | 3.785505227 | 0.024226574 | 1.73669763  |
| 0.043219281 | 0.033844201 | 1.754777826 | 0.025353597 | 1.13555176  |
| 0.166021341 | 0.122879199 | 7.151662506 | 2.484851144 | 0.118041276 |
| 0.020638795 | 0.016337538 | 1.068053388 | 2.073815322 | 1.662842523 |
| 0           | 0           | 0           | 0           | 0           |
| 0           | 0           | 4.870262468 | 0           | 1.051823192 |
| 3.465501308 | 3.175319822 | 1.589817597 | 0.000724954 | 3.464770712 |
| 0.326169715 | 0.225510213 | 2.634909824 | 1.715750946 | 0.215101233 |
| 0.214281946 | 0.155281928 | 2.323823744 | 0.109193654 | 0.148829027 |
| 0.754055136 | 0           | 0.753437537 | 1.309209861 | 0           |
| 1.054954266 | 0.013216917 | 2.663413361 | 0.010016435 | 4.160920052 |
| 0.124327132 | 0.093757645 | 3.106976317 | 0.068009398 | 0.090253461 |
| 0           | 0           | 2.307262491 | 0           | 1.876866616 |
| 0.019727172 | 0.015622768 | 0.01959646  | 0.011823576 | 1.063190129 |
| 0.06203312  | 0.048146598 | 5.347514471 | 1.17443322  | 0.046500693 |
| 0.648830849 | 0           | 1.140107348 | 0           | 0           |
| 0.846799408 | 0           | 0.846409569 | 0           | 0.848598995 |
| 0.659818063 | 0           | 1.523496905 | 0.677681957 | 1.843949777 |
| 0           | 0           | 0.839203499 | 0.851562481 | 0.841423794 |
| 0.376437149 | 0.255041066 | 4.662867523 | 0.171217675 | 0.24278955  |
| 0.901226346 | 4.90245226  | 0           | 3.464461746 | 1.874767719 |
| 0.098950094 | 0.075491175 | 1.955986494 | 0.055288058 | 1.295742666 |
| 0           | 0           | 1.528857601 | 1.948735975 | 0.955275919 |
| 0           | 0           | 0           | 0           | 0           |
| 0.085811135 | 0.065865997 | 0.085155785 | 0.048487265 | 0.063532134 |
| 2.304164173 | 0.056879002 | 2.910380665 | 0.04207482  | 1.846168555 |
| 1.649607794 | 1.609814392 | 4.208896329 | 1.531409742 | 3.537952928 |
| 6.519863541 | 5.191702731 | 1.348450895 | 1.921086904 | 1.964994608 |
| 0           | 0           | 4.018220689 | 0.82904459  | 3.195640869 |
| 0           | 0           | 5.125648882 | 0.48928304  | 0.468737124 |
| 0.120536704 | 0.091055923 | 3.696809361 | 0.066142807 | 0.087669725 |
| 0.235217973 | 0.168925959 | 1.686630507 | 0.118003884 | 2.293258933 |
| 1.357510928 | 0.087229893 | 2.798186592 | 0.063490634 | 0.084009094 |
| 0.110379599 | 0.083770338 | 1.995121961 | 0.061083536 | 0.080697388 |
| 0           | 0           | 0.919593614 | 2.068555809 | 2.180910304 |
| 0.13384201  | 0.100499112 | 0.132721438 | 0.072644785 | 3.815697551 |



| hsa-miR-7705 | hsa-miR-205-5p | hsa-miR-25-5p | hsa-miR-521 | hsa-miR-6516-5p |
|--------------|----------------|---------------|-------------|-----------------|
| 2.499181493  | 6.477299063    | 0.079980799   | 0.090622517 | 1.380084365     |
| 2.032800356  | 0.007785074    | 0.005014207   | 0.005570873 | 0.005485179     |
| 1.090581619  | 0              | 1.85152652    | 0           | 0.79159162      |
| 0.860243004  | 1.812003412    | 1.429313344   | 0.865033403 | 1.82778555      |
| 0.015034017  | 0.017902877    | 1.647375579   | 0.01272369  | 0.012524674     |
| 2.153400533  | 0.037815339    | 0.023752307   | 0.026520701 | 0.026092719     |
| 3.488617583  | 4.969832701    | 1.642846859   | 0.166519668 | 1.674638088     |
| 1.394441214  | 0              | 0             | 0           | 1.716887354     |
| 1.295197593  | 0              | 0             | 0           | 1.703112372     |
| 2.410869352  | 4.788563929    | 0.745546484   | 0           | 1.2686542       |
| 2.056829023  | 7.707863499    | 0.079861747   | 0.090484851 | 2.450492728     |
| 1.990534364  | 1.352269006    | 1.313430631   | 0.077203365 | 0.07581953      |
| 3.513430305  | 0              | 0.954028869   | 0           | 0.95271785      |
| 1.874926129  | 0.079837237    | 1.224178379   | 0.05448056  | 1.23244771      |
| 1.958985595  | 1.957824475    | 0             | 0           | 0.969728574     |
| 3.700196182  | 0.092032135    | 1.875572481   | 0.062316262 | 1.888793819     |
| 1.599577805  | 8.20616102     | 0.718896892   | 1.925654822 | 2.181889214     |
| 3.770441678  | 7.029349936    | 1.350453091   | 0           | 1.74005403      |
| 1.456854528  | 2.135166007    | 2.041271838   | 0.101509152 | 1.42358041      |
| 1.540833298  | 0              | 0.965941535   | 0           | 0               |
| 3.700130013  | 3.049098282    | 0.232522837   | 0.273535712 | 0.266892941     |
| 1.405546949  | 3.377350718    | 0.07936863    | 0.089914723 | 2.013282386     |
| 2.645353058  | 0              | 0.893478618   | 0           | 0.89063727      |
| 0.186904012  | 1.685639217    | 0.130040933   | 0.149229033 | 0.146190173     |
| 2.611156689  | 0              | 0             | 0           | 0.86807811      |
| 1.484258206  | 0              | 0.462895239   | 0.453810484 | 0.45502874      |
| 2.636354676  | 5.18964343     | 1.034935396   | 0.008257102 | 2.044853898     |
| 2.292619825  | 0.222349257    | 0.121527208   | 0.139161259 | 2.222716077     |
| 2.23383904   | 0.059142239    | 0.036508669   | 0.040901086 | 0.040220064     |
| 2.02694241   | 0              | 0.800237732   | 0           | 1.338024328     |
| 2.514895908  | 2.093565117    | 0.082619324   | 0.093675672 | 1.39232725      |
| 1.117727243  | 0.036729995    | 1.107916524   | 4.608096279 | 1.111507271     |
| 1.835928732  | 5.75780527     | 2.826075117   | 6.960781521 | 1.201010375     |
| 0.674038721  | 0              | 0             | 2.13410863  | 1.884452471     |
| 0.749511312  | 1.961576524    | 0.763017966   | 0           | 0.757617258     |
| 2.200607935  | 0.738654138    | 1.281538917   | 0.742062901 | 1.971847637     |
| 2.427534524  | 4.322532524    | 1.31207871    | 0.0768546   | 2.387786277     |
| 2.891332069  | 6.326959328    | 2.069204481   | 0.013380828 | 0.013171216     |
| 1.164247976  | 0.051863587    | 1.757487634   | 0.03603818  | 0.035444358     |
| 2.440657523  | 2.446395025    | 3.106449517   | 0.019711264 | 0.019397988     |
| 2.117318824  | 0.85303575     | 0.860420071   | 0           | 1.413426236     |
| 0.006545573  | 2.62146559     | 1.023548414   | 0.005556662 | 0.00547119      |
| 2.083960998  | 0.146624622    | 1.385385084   | 3.306161417 | 0.094190177     |
| 1.596026396  | 2.302733203    | 2.167322416   | 0.133192606 | 1.547731516     |
| 0.139164429  | 0.175422096    | 0.099110566   | 2.1172714   | 2.112705312     |
| 1.889035668  | 0              | 1.491343448   | 0           | 1.896555222     |
| 2.505006613  | 4.473230784    | 0.159877805   | 0.1848321   | 2.404644586     |
| 1.371418325  | 0.123887231    | 0.072708963   | 0.082228777 | 0.080740553     |
| 3.863144531  | 2.109948566    | 1.418215362   | 2.799594804 | 2.130944746     |
| 2.796255477  | 2.393092185    | 0.130967832   | 0.150327586 | 0.147260902     |
| 1.971790277  | 2.432065245    | 0.065102154   | 0.073481175 | 0.072173558     |
| 1.658342071  | 0              | 0.759180222   | 0           | 0.753719011     |
| 2.591866784  | 0              | 0             | 0           | 0               |
| 2.63033198   | 4.853948253    | 0.102208043   | 0.11646792  | 0.114223694     |
| 2.464420105  | 13.62991834    | 1.099537512   | 0.023747424 | 2.452161063     |
| 0            | 0              | 0             | 0           | 0               |

|             |             |             |             |             |
|-------------|-------------|-------------|-------------|-------------|
| 2.780258359 | 1.366338328 | 0.071010275 | 0.080272425 | 0.078825041 |
| 0           | 0           | 0           | 0           | 0           |
| 1.023981931 | 5.464743187 | 2.349987621 | 0.005229431 | 1.022844656 |
| 2.404244091 | 2.082187852 | 1.057293776 | 0.013585308 | 1.059110106 |
| 1.342395532 | 0           | 1.682069091 | 0           | 1.009710706 |
| 3.980950751 | 0.09637945  | 2.911526939 | 6.30741436  | 0.063941494 |
| 2.030693574 | 5.360233621 | 2.027235895 | 1.022879026 | 2.61470571  |
| 2.742023114 | 0           | 0.646737977 | 0           | 0.639858712 |
| 2.792283208 | 3.39596716  | 2.003946943 | 0           | 0.75682608  |
| 2.586807452 | 6.97947193  | 0.000264848 | 0.000293879 | 2.001611364 |
| 1.514244531 | 5.853298888 | 0.100552939 | 0.114533631 | 0.112334169 |
| 1.875583589 | 6.217524583 | 1.47994827  | 0           | 0           |
| 0.181945345 | 7.983671503 | 0.126892174 | 0.145500758 | 1.595023535 |
| 2.133247905 | 0           | 1.43189566  | 0           | 1.830652426 |
| 0           | 0           | 0           | 3.371679367 | 0.936540688 |
| 1.139931503 | 0.043908082 | 1.12801773  | 0.03067     | 2.488711664 |
| 2.190831232 | 0.047605581 | 1.138252325 | 0.033171933 | 0.032628729 |
| 0.205113656 | 1.749554013 | 1.629824689 | 0.162823267 | 0.159434812 |
| 2.545715531 | 5.942186251 | 0.829658135 | 0           | 0.825441154 |
| 1.358164268 | 0.817037248 | 0.82550909  | 0           | 0           |
| 1.727360125 | 0.037493998 | 1.110070756 | 1.114359403 | 0.025876705 |
| 2.228578083 | 1.575978386 | 3.172839032 | 0.125723137 | 0.123261375 |
| 1.166390833 | 1.167368736 | 0.679664765 | 0           | 1.183921396 |
| 2.82106061  | 0.056516133 | 0.034961518 | 0.039151871 | 0.038502406 |
| 4.24145999  | 0.175888724 | 0.099340773 | 0.113117988 | 1.469483335 |
| 1.976322165 | 0           | 0           | 0           | 1.978023461 |
| 0           | 3.59192077  | 0.765932772 | 0           | 0           |
| 1.070791441 | 0.021822594 | 2.403758399 | 0.015468657 | 0.015225174 |
| 0.921409492 | 0           | 1.843433265 | 0           | 0.489501813 |
| 2.048361776 | 0           | 0           | 0           | 1.753961396 |
| 3.070110403 | 0.126498592 | 1.339000436 | 0.083826632 | 0.082304861 |
| 2.286183651 | 5.434275014 | 1.182607074 | 0           | 0.663627052 |
| 3.391089895 | 3.158443036 | 0.175965507 | 0.204232671 | 1.81409738  |
| 2.001891523 | 6.324308282 | 2.001681895 | 0.000319783 | 1.58661236  |
| 3.489582731 | 6.034744994 | 0.14475179  | 0.166720994 | 0.163230197 |
| 1.584451093 | 1.598391591 | 2.157031795 | 0.13054471  | 0.127967436 |
| 1.432822454 | 1.431626735 | 0           | 0           | 3.292002614 |
| 1.64304664  | 5.325490088 | 1.637181602 | 2.868651818 | 2.057540636 |
| 1.599962889 | 3.213710054 | 0           | 0           | 1.928431175 |
| 0.577024485 | 0           | 0.594438634 | 0           | 1.737359658 |
| 1.409917117 | 0           | 1.424715619 | 0           | 0.861701011 |
| 1.919178682 | 1.93024094  | 1.258364804 | 2.325622129 | 0.062011773 |
| 4.044322954 | 0           | 0           | 0           | 0           |
| 0.018267278 | 0.021784655 | 0.013866453 | 0.015442158 | 1.067129545 |
| 1.554192543 | 1.844853623 | 0.688055653 | 0           | 1.881894307 |
| 0.824636516 | 1.763236849 | 1.388229175 | 0           | 1.381837435 |
| 2.307151165 | 2.306545237 | 0.989779191 | 0           | 2.308320174 |
| 1.958085635 | 0           | 1.289607266 | 0           | 0           |
| 0.501402216 | 1.573425145 | 2.091577236 | 0.969470698 | 0.971603219 |
| 1.989863674 | 0           | 0           | 0           | 0.821630883 |
| 2.050512648 | 1.039197753 | 0.007736621 | 0.008601751 | 2.633829774 |
| 1.615805754 | 0           | 0.54043568  | 0           | 1.650582053 |
| 0.880620172 | 0           | 0.888282899 | 0           | 0           |
| 1.449614157 | 4.211562255 | 2.668223832 | 0           | 0.892891312 |
| 1.82009393  | 0.656177065 | 0.666446414 | 2.949815547 | 1.166756807 |
| 2.388127375 | 3.073876951 | 0.009795416 | 0.010896729 | 1.640617759 |
| 1.681747018 | 0.025139453 | 1.671712148 | 1.675789641 | 0.017498863 |
| 2.290518442 | 0           | 0           | 0           | 1.742030644 |

|             |             |             |             |             |
|-------------|-------------|-------------|-------------|-------------|
| 0.225377519 | 3.654181193 | 0.153996889 | 0.177775568 | 1.716702102 |
| 1.656180592 | 0.703465387 | 1.308694111 | 0           | 1.02320401  |
| 2.314508736 | 3.022867408 | 0.821108354 | 0           | 0.816725249 |
| 2.606479004 | 1.6724159   | 1.511798725 | 0.435673375 | 0.86942582  |
| 2.937795125 | 2.126284894 | 1.087992169 | 0.020957616 | 1.090865504 |
| 0.088347192 | 1.982610546 | 0.064573489 | 0.072874475 | 1.308217621 |
| 2.027994121 | 0.632189499 | 1.146761157 | 0           | 1.13531343  |
| 1.170109526 | 0           | 0           | 0           | 1.199526424 |
| 2.025621725 | 2.836540802 | 0.003913772 | 0.004346997 | 1.018997778 |
| 0.04424072  | 0.053380121 | 0.033105394 | 0.037055184 | 2.194879553 |
| 2.878560767 | 2.292113372 | 2.836725006 | 0.049159276 | 0.048326376 |
| 1.134712119 | 0.04221342  | 1.727229857 | 6.168355404 | 2.156535355 |
| 1.925302615 | 1.293264405 | 0.057098061 | 0.06431302  | 2.328641695 |
| 1.03142706  | 1.623168005 | 1.029028464 | 0.00685516  | 2.037299084 |
| 1.694686301 | 0.028610327 | 1.08480099  | 0.020188164 | 0.019866963 |
| 3.146141914 | 5.523625978 | 0.050213896 | 0.056457538 | 0.055486466 |
| 2.703830657 | 0           | 0           | 0           | 1.222740488 |
| 2.19118765  | 0.047699913 | 2.167722097 | 0.033235605 | 1.751235629 |
| 0.635265201 | 0           | 0.651806353 | 0           | 0.644976713 |
| 3.302423125 | 1.186525458 | 0           | 0.686988087 | 0.688006125 |
| 3.46557287  | 0.070179736 | 1.199034436 | 0.048188455 | 1.206220847 |
| 2.961897225 | 0           | 0.626656748 | 3.005407412 | 1.787900812 |
| 2.496168211 | 4.010431503 | 0.026124274 | 0.029187402 | 0.0287136   |
| 2.504135616 | 4.97224634  | 2.1547262   | 0.030561119 | 1.131894313 |
| 2.929941747 | 0.168611141 | 1.434089953 | 0.108909595 | 2.53283284  |
| 2.676494112 | 2.681581864 | 0.013299664 | 0.014808736 | 1.660320259 |
| 1.515123285 | 0.942654221 | 2.25269807  | 0           | 3.246324303 |
| 1.934051095 | 1.045539055 | 0           | 0           | 0           |
| 2.590382788 | 0.001201907 | 0.000778478 | 1.003800305 | 0.000850786 |
| 0.25023904  | 0.332719773 | 0.169049993 | 0.195875762 | 2.890185258 |
| 1.611489669 | 2.321413367 | 0.119468919 | 0.136733401 | 1.561388624 |
| 2.797132769 | 1.278621885 | 1.302164069 | 0           | 2.659070822 |
| 1.054902332 | 0.016856234 | 1.643814382 | 0.01198828  | 1.052201322 |
| 0.10181196  | 5.819969498 | 1.338118614 | 0.083597365 | 1.351781043 |
| 1.862329415 | 0.68299815  | 1.904788553 | 0           | 0.686912703 |
| 1.064833537 | 0.01995567  | 3.247309036 | 0.014163056 | 1.061606844 |
| 0.051886969 | 0.06282329  | 1.790925172 | 0.043342994 | 3.044785564 |
| 2.270491193 | 0           | 0.660968603 | 0           | 0           |
| 1.796400204 | 2.764421514 | 1.412686592 | 0           | 2.383635953 |
| 1.828766547 | 0           | 1.568164864 | 0           | 2.109112815 |
| 0           | 0           | 1.404293746 | 0           | 0           |
| 2.665024286 | 0.384534784 | 0.18919976  | 0.220297488 | 0.215307425 |
| 0           | 1.463571032 | 0           | 3.673924157 | 0.904759759 |
| 1.941856304 | 0.10031064  | 1.275874011 | 0.067567307 | 2.344126707 |
| 1.94067306  | 0           | 0.957486642 | 0           | 2.26501643  |
| 1.450261242 | 0           | 0           | 0           | 0           |
| 1.898518412 | 1.269309328 | 0.052507728 | 0.059071944 | 2.899799285 |
| 1.232243218 | 8.18885834  | 1.210729147 | 0.051109081 | 0.050239628 |
| 2.749940178 | 0.225261937 | 0.122871515 | 0.140748231 | 3.002891    |
| 3.026410376 | 2.444931924 | 0.067067706 | 5.162470433 | 1.319895542 |
| 2.728407475 | 5.641189328 | 0           | 0           | 2.559812074 |
| 2.794730038 | 0           | 1.817357199 | 0           | 1.269676055 |
| 2.78538583  | 0.122265615 | 0.071845348 | 0.081233956 | 2.408107364 |
| 0.18572759  | 4.95730368  | 0.129295202 | 0.14834555  | 0.145329011 |
| 3.038051366 | 3.678214219 | 1.942786272 | 0.077882574 | 0.076484731 |
| 1.978680299 | 4.201124089 | 1.30428857  | 0.074847691 | 1.316267317 |
| 0.917479812 | 0           | 0.494416552 | 0           | 1.574416111 |
| 3.10033982  | 4.686629752 | 1.991654229 | 0.089483375 | 0.087841462 |

| hsa-miR-5589-5p | hsa-miR-493-5p | hsa-miR-92b-3p | hsa-miR-371a-5p | hsa-miR-3680-3p |
|-----------------|----------------|----------------|-----------------|-----------------|
| 5.196950089     | 6.813131895    | 6.98100175     | 0.126070657     | 0.079436038     |
| 6.484172716     | 5.210878154    | 5.398596065    | 0.007273183     | 0.0049851       |
| 1.351547121     | 6.685164978    | 6.033644843    | 0               | 0.389727605     |
| 4.723666471     | 5.351971432    | 6.585234863    | 0               | 0.869215541     |
| 5.584766021     | 2.892036361    | 5.340853473    | 0.016699165     | 1.053576243     |
| 6.321034107     | 5.439032467    | 7.301730861    | 0.035162956     | 0.023608319     |
| 2.951343979     | 4.641198263    | 5.536913843    | 0.245639565     | 1.64085809      |
| 1.675061976     | 5.066655222    | 9.417576022    | 0               | 2.198768916     |
| 5.183874321     | 3.318472065    | 6.452305326    | 0.763640921     | 0               |
| 0               | 5.394399398    | 5.369491635    | 0               | 0.745931637     |
| 5.069311352     | 4.694019722    | 5.522725704    | 0.125865969     | 0.079317921     |
| 2.453355918     | 6.489957817    | 5.854982052    | 0.106315414     | 1.938834503     |
| 5.726641789     | 5.378749116    | 5.276979961    | 0.950169548     | 1.942825255     |
| 2.659026043     | 3.825760008    | 5.187913343    | 0.073752689     | 0.048167488     |
| 5.036300697     | 3.535872019    | 4.703915331    | 0.968046992     | 0.97063917      |
| 2.979222053     | 3.876115622    | 5.187070897    | 2.97258028      | 0.054991418     |
| 5.416693234     | 4.446169238    | 6.037035914    | 0.703382842     | 1.634427114     |
| 0.795168012     | 1.330666468    | 5.348241449    | 0               | 2.063320527     |
| 2.935912878     | 10.211111746   | 3.647033263    | 0.142392006     | 0.088753572     |
| 5.188538262     | 6.893924756    | 6.640242352    | 0               | 0               |
| 6.154016546     | 4.440407997    | 4.647422668    | 0.439577701     | 0.230509349     |
| 2.073689533     | 4.405468791    | 8.592218387    | 0.125018724     | 0.078828671     |
| 4.27451316      | 10.70831376    | 4.338194056    | 0               | 0.893668802     |
| 6.788213895     | 5.218310384    | 5.78597013     | 0.217178964     | 0.129072369     |
| 0               | 9.596715249    | 5.26355306     | 0.862010751     | 0               |
| 3.30808266      | 6.136422618    | 6.527861316    | 0               | 0.463445569     |
| 2.374469153     | 4.146602557    | 6.169581657    | 0.010801511     | 0.007383885     |
| 1.638796154     | 4.349112677    | 5.616722991    | 0.200948386     | 2.62459026      |
| 1.810271504     | 4.371938428    | 4.872839507    | 1.189219913     | 0.036281036     |
| 5.789626696     | 4.346552927    | 6.33817427     | 0               | 0.800560046     |
| 5.216214803     | 5.091223289    | 6.396036162    | 0.130621113     | 2.440107174     |
| 3.344530109     | 2.483576636    | 3.636694137    | 2.154584066     | 0.022951442     |
| 0.068235787     | 1.212580889    | 5.418777812    | 1.217124579     | 1.806606331     |
| 5.712998798     | 5.729800315    | 6.179456568    | 0               | 1.208141114     |
| 5.524580073     | 3.903920115    | 6.091181341    | 0               | 0.763384206     |
| 1.256991045     | 7.651372135    | 2.898348018    | 0               | 1.282136088     |
| 7.190219099     | 2.449647226    | 2.790887452    | 0.10580724      | 0.067586306     |
| 5.0971111       | 5.557347552    | 5.770521715    | 0.017570112     | 1.650385658     |
| 2.547254748     | 4.056722493    | 5.615198737    | 0.048120131     | 1.149600556     |
| 4.785210086     | 5.500715878    | 7.334443071    | 0.026003435     | 1.082644747     |
| 4.798115042     | 2.584651948    | 4.707924155    | 0.850396028     | 0.860660746     |
| 6.085444192     | 3.3605169      | 5.564576165    | 0.007254554     | 0.004972402     |
| 6.206582949     | 1.435587439    | 4.728453046    | 0.134058151     | 0.084020673     |
| 4.771239028     | 4.671393699    | 5.267957186    | 0.191442422     | 0.115615806     |
| 0.175276341     | 4.048909576    | 5.510063496    | 2.988122945     | 2.850546833     |
| 7.789914519     | 4.719454229    | 5.217955132    | 0               | 0               |
| 0.309855039     | 3.932329325    | 4.31600528     | 0.276610798     | 0.15862853      |
| 4.94915442      | 5.316741233    | 5.369535217    | 1.380030455     | 0.072220632     |
| 4.454588034     | 5.364961847    | 4.339510921    | 4.221311785     | 2.139016122     |
| 5.142068528     | 5.684663326    | 5.50500084     | 0.218965026     | 1.583683014     |
| 5.311508142     | 5.364095711    | 6.417974497    | 0.100905561     | 0.064671417     |
| 5.470158192     | 6.490063455    | 5.96997546     | 0               | 0.75955071      |
| 0.555133986     | 5.752290815    | 7.377049787    | 0               | 1.957925408     |
| 3.736839948     | 7.342508162    | 6.936185793    | 0.165258392     | 1.460923174     |
| 5.456543446     | 3.973404733    | 4.628721289    | 0.031421476     | 1.699799088     |
| 5.153248775     | 4.44067023     | 5.776457077    | 0               | 1.338028592     |

|             |             |             |             |             |
|-------------|-------------|-------------|-------------|-------------|
| 3.693001197 | 4.344727201 | 4.540518176 | 0.110798679 | 0.070534933 |
| 4.638529569 | 4.809996213 | 6.848785387 | 0           | 1.536650443 |
| 5.992822789 | 5.562182005 | 4.561574273 | 0.006825698 | 0.004679964 |
| 6.143891931 | 3.79588708  | 4.683022727 | 0.017841294 | 3.073803408 |
| 2.661311718 | 5.507178997 | 7.470029772 | 0           | 1.930015111 |
| 2.384079032 | 10.26759946 | 3.893808514 | 4.597825957 | 0.057392775 |
| 0.007275949 | 3.205789012 | 7.616287955 | 0.0068021   | 2.349809453 |
| 0.636434165 | 9.725760112 | 4.558142892 | 0.629941981 | 2.658821125 |
| 3.395965548 | 5.323555718 | 5.124299873 | 0           | 1.299110552 |
| 4.646005784 | 5.359729846 | 5.04656241  | 0.000382201 | 1.586419935 |
| 6.700263521 | 4.200924543 | 4.927614605 | 0.16227251  | 0.099841386 |
| 3.848163591 | 5.200920586 | 5.091545773 | 0           | 0           |
| 5.339207837 | 4.635532688 | 5.710315222 | 0.211139574 | 0.125952038 |
| 4.474808203 | 5.057148535 | 5.998479017 | 0           | 1.43223371  |
| 4.352879749 | 6.157478972 | 7.070227775 | 0.933219066 | 1.512414816 |
| 4.861517617 | 3.796221596 | 4.538488357 | 0.040789485 | 1.732204969 |
| 6.714321551 | 4.626430214 | 6.020052874 | 0.044198832 | 0.029480743 |
| 1.749842599 | 5.580319889 | 6.274094147 | 0.239492167 | 0.140408757 |
| 3.409958699 | 4.0245524   | 5.960195248 | 0           | 1.382006902 |
| 4.645090757 | 4.277924055 | 4.153396083 | 0.813727658 | 0.825798731 |
| 0.037470205 | 4.710888246 | 8.943519896 | 0.034865906 | 2.133463153 |
| 6.044683606 | 2.723476369 | 3.96885168  | 0.179666497 | 0.109316411 |
| 3.245386352 | 5.338670094 | 6.07718744  | 0           | 0.68011161  |
| 7.931571877 | 4.27198677  | 6.509739894 | 0.052398817 | 1.162218252 |
| 6.80545036  | 5.45688081  | 4.998161389 | 0.16009275  | 1.448528951 |
| 3.293960048 | 3.142257341 | 5.099686621 | 0           | 0           |
| 2.429609702 | 4.58026927  | 7.423077699 | 0           | 0.766295752 |
| 1.670919251 | 7.30386368  | 3.91632873  | 2.908867536 | 3.08379449  |
| 2.138509058 | 5.212489829 | 8.66695892  | 0           | 1.31214514  |
| 2.293846745 | 8.281188166 | 3.488850102 | 0           | 0           |
| 4.467642881 | 5.784896034 | 5.379797803 | 0.116016411 | 0.073596309 |
| 0           | 1.525413619 | 7.131864156 | 0           | 0.670719303 |
| 3.158509794 | 3.803891773 | 5.825318565 | 0.310381805 | 0.174556596 |
| 0.000444398 | 4.525898289 | 8.131682153 | 0.000415899 | 0.000286538 |
| 5.239343943 | 3.828125351 | 6.25758907  | 0.24597538  | 0.14364736  |
| 5.816996935 | 5.025795174 | 5.384986619 | 0.187252678 | 1.512505497 |
| 6.598356475 | 2.810090462 | 3.501949583 | 0           | 0           |
| 7.985268088 | 3.982329373 | 4.935276934 | 0.013918805 | 1.044782645 |
| 3.1012211   | 8.897669891 | 5.593065114 | 9.085978118 | 1.24528672  |
| 0           | 7.912525568 | 5.60706351  | 0           | 1.085315406 |
| 5.046889981 | 6.133574253 | 6.616030221 | 0           | 0           |
| 5.344039222 | 5.867439104 | 7.087953101 | 0.085992383 | 1.878204327 |
| 5.237363194 | 2.542271523 | 5.62406911  | 0           | 1.965832041 |
| 4.918873251 | 7.814390897 | 3.104161455 | 0.020307582 | 0.013784269 |
| 0.677653057 | 6.266305038 | 4.786188347 | 0           | 2.368620728 |
| 0           | 5.812291797 | 9.536015183 | 0           | 0           |
| 1.571532665 | 10.02631213 | 4.737215645 | 3.790568033 | 0           |
| 7.465047832 | 4.419171991 | 5.437178947 | 0           | 1.290192378 |
| 3.683894422 | 2.479445684 | 5.117636903 | 0           | 1.345925706 |
| 3.753507778 | 6.851918448 | 6.058815814 | 0           | 0.411063612 |
| 4.309753852 | 3.968100249 | 5.586848082 | 0.011255209 | 2.631414277 |
| 0           | 2.378296395 | 6.460757983 | 0           | 1.377850927 |
| 4.662275657 | 9.317144184 | 5.778482871 | 0           | 1.452852379 |
| 0.889645968 | 10.43867628 | 8.722975978 | 0           | 0           |
| 4.0393156   | 4.876788724 | 6.907663635 | 2.264350303 | 1.866230449 |
| 1.049672776 | 4.663830133 | 6.619685725 | 0.014282186 | 1.638382614 |
| 6.621747539 | 8.479691938 | 6.012623872 | 0.023422594 | 0.015862054 |
| 4.823374537 | 5.350874338 | 6.932625761 | 0           | 0.806000425 |

|             |             |             |             |             |
|-------------|-------------|-------------|-------------|-------------|
| 4.432062782 | 5.669460301 | 5.388370181 | 0.264573704 | 1.680059037 |
| 2.323713989 | 5.285183294 | 7.45658631  | 0           | 1.310262867 |
| 5.407639869 | 4.384569557 | 4.541038557 | 0           | 0.821403851 |
| 2.572077686 | 5.541376294 | 6.885683475 | 0           | 1.513273107 |
| 2.946259678 | 4.735173873 | 8.681274277 | 0.027673074 | 0.018681896 |
| 0.108685568 | 4.188936573 | 5.456926621 | 10.74615509 | 1.295863373 |
| 3.528014434 | 4.695801698 | 6.81122643  | 0           | 1.147528976 |
| 0.431449086 | 7.909497849 | 4.672990167 | 0           | 0.438654485 |
| 4.118699588 | 5.760116682 | 5.890204238 | 0.005670236 | 1.018398319 |
| 2.553474521 | 4.90586677  | 2.552828058 | 0.049515485 | 1.153727072 |
| 1.855070301 | 11.50922963 | 4.244640041 | 0.066284758 | 1.816554039 |
| 5.569244651 | 3.36905686  | 5.38178961  | 1.748938022 | 0.026258111 |
| 3.593367224 | 6.991293642 | 6.809190232 | 0.0877079   | 0.056726324 |
| 6.75114418  | 4.441910829 | 5.858013573 | 1.031765985 | 1.618716492 |
| 6.276187943 | 4.313253789 | 4.603829186 | 0.026641939 | 1.084619579 |
| 6.772326648 | 4.475260474 | 3.838554099 | 0.076542259 | 1.231481115 |
| 1.206403916 | 5.595264794 | 6.245236834 | 0           | 3.169679897 |
| 8.534187734 | 4.758796065 | 4.138230889 | 0.044285762 | 0.029536867 |
| 0           | 4.568198792 | 5.919037723 | 0           | 1.159697949 |
| 3.703496115 | 3.27313161  | 6.30376491  | 0           | 1.600466849 |
| 5.037432833 | 4.332306652 | 3.317242322 | 0.064928647 | 0.042669451 |
| 0.61649352  | 3.242760617 | 7.305567994 | 1.454699677 | 2.272264627 |
| 4.453646703 | 4.730898411 | 6.165274253 | 0.0387751   | 0.025965063 |
| 2.513637838 | 3.375919164 | 4.972663788 | 0.0406414   | 0.02717791  |
| 0.168472686 | 10.5560212  | 4.808992765 | 0.153640184 | 0.095061472 |
| 1.667272187 | 6.991802885 | 6.258524816 | 0.019465507 | 1.062276246 |
| 0           | 3.369902383 | 5.762964387 | 0           | 2.252892955 |
| 1.04538396  | 3.936074371 | 9.829222667 | 0           | 1.446333203 |
| 5.7343228   | 5.006366647 | 5.937169364 | 0.001124041 | 1.003664321 |
| 8.498085075 | 3.469243538 | 4.682826277 | 0.295711715 | 1.742211167 |
| 4.581235728 | 4.034236856 | 3.856812756 | 0.197071294 | 0.118594881 |
| 6.187489936 | 4.387840964 | 5.456352894 | 0           | 2.484285204 |
| 5.041269407 | 4.841856688 | 5.702678194 | 0.015725476 | 2.872307192 |
| 1.381741777 | 2.487832423 | 4.888002518 | 0.115679    | 0.073398983 |
| 8.94106308  | 4.252037384 | 5.700036987 | 0           | 0.693721843 |
| 2.901715514 | 4.625604418 | 4.188335062 | 0.018607944 | 2.883840896 |
| 4.624147445 | 4.38831363  | 6.51922126  | 0.058189251 | 1.179126479 |
| 3.397895778 | 3.107663984 | 4.084131333 | 0           | 1.171448254 |
| 0.847624948 | 5.064798571 | 8.761283376 | 0           | 0           |
| 1.819390692 | 5.500121248 | 6.143953172 | 0           | 0           |
| 6.137860659 | 4.377485188 | 4.433724178 | 0           | 0           |
| 3.89476558  | 4.824875956 | 5.558528288 | 0.339116171 | 0.187655323 |
| 7.589913715 | 5.158456279 | 5.879762486 | 0           | 0           |
| 7.55909873  | 4.45909996  | 5.42223037  | 0.092371853 | 1.275188457 |
| 3.834854697 | 4.626742437 | 5.54001753  | 0           | 0.957567587 |
| 0           | 6.021456791 | 7.12913199  | 0           | 1.116535164 |
| 3.715330231 | 4.654565818 | 7.046427943 | 0.080243859 | 1.860523057 |
| 1.865619103 | 5.216331132 | 5.645664775 | 0.069014288 | 2.251745595 |
| 5.378709213 | 5.003546106 | 6.425039588 | 0.203490372 | 0.121967341 |
| 1.998046732 | 9.982360067 | 6.048021963 | 3.280644396 | 1.932604204 |
| 3.784825893 | 4.446429828 | 6.28484331  | 0           | 1.376823065 |
| 1.739530861 | 4.667421024 | 6.48061892  | 0           | 0.935521706 |
| 6.112557019 | 3.523581823 | 3.092676773 | 0.112207514 | 0.07136363  |
| 7.020717791 | 4.762432357 | 6.814225846 | 0.215744728 | 1.576618692 |
| 5.232213888 | 5.997734026 | 7.387291339 | 0.107305829 | 0.068473649 |
| 8.365064162 | 4.678150516 | 5.645957501 | 0.102888173 | 0.065852736 |
| 5.265364719 | 6.926111104 | 5.319034741 | 0           | 0.494960496 |
| 6.311766647 | 3.749601818 | 4.996671006 | 0.124378195 | 1.359734029 |

| hsa-miR-577 | hsa-miR-34b-5p | hsa-miR-203b-3p | hsa-miR-6788-3p | hsa-miR-892a |
|-------------|----------------|-----------------|-----------------|--------------|
| 0.118054421 | 0.092390051    | 1.417593785     | 2.036830091     | 0.088082881  |
| 0.006907482 | 1.024576486    | 0.007628444     | 0.005992439     | 0.005440055  |
| 0           | 0              | 1.346728013     | 0.780200764     | 0            |
| 0           | 2.141249708    | 0               | 1.419208334     | 0            |
| 0.015841574 | 0.01293354     | 1.65616551      | 0.01370428      | 0.01241992   |
| 1.730849795 | 0.026972457    | 1.121976006     | 0.028635867     | 0.025867621  |
| 0.226853616 | 0.170237857    | 0.265014068     | 1.707484999     | 0.161215213  |
| 0           | 2.351788474    | 1.672197596     | 2.903926167     | 0            |
| 0.763453286 | 0              | 0               | 1.693516647     | 0            |
| 4.268023324 | 0              | 0               | 0               | 0            |
| 2.067402808 | 2.023029296    | 3.752726408     | 0.098823012     | 0.087949719  |
| 0.099786791 | 0.078669721    | 4.320669759     | 1.337904173     | 0.075093777  |
| 0           | 0              | 0               | 2.257768109     | 0.952834897  |
| 3.34019635  | 0.055467786    | 0.077960485     | 1.240318564     | 0.053057194  |
| 0           | 0              | 0               | 1.547957897     | 0            |
| 2.358718408 | 0.063464296    | 0.089816064     | 1.274142198     | 5.090570818  |
| 4.104866643 | 0.71090021     | 0.706095205     | 1.609888416     | 0            |
| 0.791421319 | 0.798008128    | 2.492230571     | 2.706467022     | 0.799956711  |
| 0.133083308 | 0.103530848    | 0.15174118      | 0.111078766     | 0.098607329  |
| 0.963087183 | 0              | 0               | 0               | 0            |
| 0.397198091 | 0.28067673     | 2.294664981     | 2.125278493     | 0.263445731  |
| 3.871731624 | 2.020462697    | 3.905057524     | 2.033522338     | 2.01141875   |
| 2.163595245 | 0              | 0               | 2.171956547     | 0            |
| 0.201226655 | 0.152466621    | 1.691199116     | 0.164661224     | 0.144602793  |
| 0           | 0.86697441     | 0               | 2.140300973     | 0            |
| 1.477107788 | 1.233095825    | 0.876786055     | 0.448814245     | 0.455696957  |
| 0.010254054 | 0.008391833    | 8.8084399       | 1.037008834     | 0.008061988  |
| 0.186537351 | 0.142128709    | 0.215640018     | 3.036960073     | 0.134917033  |
| 0.051760019 | 0.041620728    | 0.057809435     | 0.044277532     | 0.03986217   |
| 0.787240653 | 1.335481657    | 0               | 0               | 0            |
| 3.13947563  | 2.037353832    | 0.139003388     | 1.407705942     | 1.390876659  |
| 3.489586096 | 0.02621641     | 1.118560463     | 2.143257529     | 0.025144298  |
| 0.059614558 | 0.047779879    | 1.844463421     | 2.255630523     | 0.045735354  |
| 0           | 2.533935514    | 0               | 1.187596844     | 0            |
| 0           | 0              | 0.751024377     | 1.283060176     | 0            |
| 1.254581275 | 0              | 0               | 0               | 5.98483672   |
| 0.099315768 | 0.078313308    | 0.112267225     | 1.971923424     | 2.386001269  |
| 0.016666051 | 0.013601863    | 2.40694685      | 0.014413777     | 0.013060889  |
| 1.782216748 | 1.156904275    | 2.216205377     | 2.198289278     | 0.035132204  |
| 0.024640522 | 0.020041771    | 0.027333394     | 0.02125721      | 0.019233157  |
| 2.371123057 | 0              | 0               | 1.408276553     | 0.857153283  |
| 0.006889805 | 0.005646738    | 0.007608888     | 0.005977137     | 0.005426182  |
| 3.15209848  | 0.097863885    | 0.142719083     | 2.061733235     | 0.093256395  |
| 0.177908678 | 0.136003312    | 1.615857087     | 0.146558716     | 0.129170317  |
| 4.48995349  | 0.115144944    | 1.520832327     | 0.123733919     | 1.466596426  |
| 0           | 0              | 0               | 2.471402147     | 1.488343406  |
| 0.254553867 | 0.189081931    | 0.299543496     | 1.78072889      | 0.17877941   |
| 0.106594892 | 0.083806349    | 2.823468561     | 1.997402197     | 0.079960273  |
| 4.721362318 | 0              | 0               | 2.79222025      | 0.856529349  |
| 0.202839783 | 0.153595084    | 2.395360623     | 1.642043787     | 0.145659084  |
| 1.337039233 | 0.074866376    | 0.10700434      | 1.322022799     | 0.071487633  |
| 0           | 1.283093427    | 2.768460914     | 1.667630962     | 0            |
| 2.831929898 | 0              | 2.420401269     | 1.671710072     | 0            |
| 0.154043307 | 0.118853048    | 2.216858428     | 1.503026041     | 0.113049284  |
| 2.140413553 | 1.103944067    | 0.033049506     | 2.132237047     | 0.023166209  |
| 2.837335698 | 0.78725011     | 0               | 1.322738384     | 0            |

|             |             |             |             |             |
|-------------|-------------|-------------|-------------|-------------|
| 1.367936107 | 1.34289346  | 0.117632748 | 2.756723266 | 0.078066091 |
| 1.785866582 | 0.63997515  | 0           | 1.50793342  | 0           |
| 0.006482846 | 0.005314135 | 1.614314018 | 1.612771977 | 0.00510673  |
| 3.67523053  | 0.01380983  | 0.018735891 | 2.076421937 | 0.013260328 |
| 0.986773054 | 0           | 0.990053191 | 2.094038725 | 0           |
| 3.728894812 | 0.066286435 | 0.094039053 | 1.286031059 | 0.063343704 |
| 2.841166934 | 0.005295829 | 1.023974399 | 0.00560542  | 0.005089147 |
| 2.421106786 | 1.513011787 | 0           | 1.80322184  | 2.070949107 |
| 3.068470607 | 0.755069008 | 1.656023774 | 0           | 4.347663006 |
| 1.001359426 | 1.001299432 | 1.001352107 | 1.58653163  | 0.000287064 |
| 0.15131266  | 0.116870845 | 0.173335696 | 1.494992297 | 0.11118306  |
| 0           | 0.907925943 | 2.187462975 | 0           | 0           |
| 0.195767144 | 0.148637471 | 3.90169826  | 0.160443995 | 0.1410171   |
| 1.415832588 | 0.866670253 | 0           | 1.824626442 | 0           |
| 4.757057724 | 0.935963834 | 2.228617903 | 1.916640954 | 0           |
| 0.03858332  | 0.031197408 | 0.042950025 | 2.496661522 | 0.029907857 |
| 1.766799255 | 0.033745604 | 0.046558571 | 0.035860492 | 0.032343137 |
| 0.221332318 | 0.166436956 | 2.929860538 | 1.692602885 | 0.15766613  |
| 6.253688903 | 0.82405805  | 0           | 0.821766091 | 0           |
| 4.795349506 | 0.819802132 | 0           | 1.363599766 | 0           |
| 5.819129842 | 0.02674872  | 0.036687203 | 0.028397447 | 0.025653578 |
| 0.16719336  | 0.128341281 | 0.192313253 | 0.138159956 | 0.121973786 |
| 0           | 0.671038304 | 1.164366162 | 0           | 0           |
| 0.049496178 | 0.039838074 | 0.055249482 | 0.04237061  | 0.038161063 |
| 0.149318035 | 0.115420308 | 0.170963024 | 1.489106193 | 0.109817    |
| 0.981543386 | 0           | 0           | 2.298300097 | 0           |
| 1.664029233 | 0.758839596 | 11.15699748 | 0.755985141 | 1.998252551 |
| 4.273636146 | 0.01572545  | 3.808436752 | 1.666546796 | 1.66335279  |
| 0.478809502 | 0.937304234 | 9.321738444 | 0.930184802 | 0           |
| 0           | 0           | 1.340955729 | 3.522867556 | 0           |
| 0.108767832 | 1.992918877 | 0.123248292 | 2.774436554 | 0.081507063 |
| 4.949135488 | 3.487383274 | 0           | 1.539186511 | 0           |
| 0.284538764 | 0.20907069  | 0.33749072  | 2.981577141 | 0.197354463 |
| 1.001479248 | 0.000324901 | 0.000435864 | 1.001437213 | 0.000312367 |
| 1.758696813 | 0.170444902 | 1.773887604 | 2.376086971 | 0.161408479 |
| 2.269268576 | 2.63866176  | 0.20061476  | 0.143578981 | 0.126619789 |
| 0.874082735 | 1.844224918 | 0           | 1.840694326 | 0           |
| 1.049069101 | 1.046756331 | 0.014610017 | 3.06427498  | 1.639038966 |
| 2.146663092 | 0.711167514 | 0.706361614 | 0           | 0           |
| 0.576219972 | 0           | 0           | 1.426553156 | 0           |
| 0.855453948 | 0           | 5.490441623 | 2.131304544 | 0           |
| 3.856263999 | 1.271584073 | 0.091029579 | 3.163505272 | 0.061434281 |
| 0.970109388 | 1.551021328 | 0           | 2.545826021 | 0           |
| 1.071295885 | 0.015698495 | 1.071027548 | 2.41139635  | 0.015071193 |
| 0           | 0           | 0           | 1.185370146 | 1.883279515 |
| 0           | 0.829658842 | 1.368079911 | 1.77464397  | 0           |
| 1.985522031 | 0.989374845 | 2.569079433 | 1.572118538 | 0           |
| 0.740286216 | 0           | 0.742895221 | 1.661761798 | 0.750021783 |
| 2.854387303 | 0.967315444 | 0           | 0.505422618 | 0           |
| 0           | 0.400197735 | 2.382494727 | 1.138557838 | 0           |
| 0.010684175 | 0.008742223 | 0.011810468 | 2.048633706 | 0.008398331 |
| 0           | 5.707945205 | 0           | 0.988847856 | 0.533456771 |
| 1.840935671 | 0           | 1.437804195 | 0           | 0           |
| 3.155258703 | 1.455721522 | 0           | 0.890421599 | 1.45756732  |
| 2.619178604 | 0           | 0           | 1.533586572 | 0           |
| 0.013552651 | 2.383628002 | 1.64598525  | 3.874430591 | 0.010637665 |
| 1.683230191 | 1.676409419 | 5.712841655 | 1.079430477 | 0.017350814 |
| 0           | 1.738904649 | 0           | 0.796964938 | 0           |



|             |             |             |             |             |
|-------------|-------------|-------------|-------------|-------------|
| 0.243811087 | 0.181817803 | 1.826450352 | 1.752599144 | 0.172014807 |
| 0.689304085 | 1.277910398 | 3.071076754 | 0.698478225 | 2.309950266 |
| 3.704236353 | 0           | 1.349727212 | 1.755072865 | 0.817111667 |
| 0.846848548 | 0.434463427 | 1.443667144 | 1.194047577 | 0           |
| 0.026217409 | 0.021310045 | 1.70187542  | 1.09352234  | 1.090605842 |
| 3.620287834 | 0.074246548 | 0.106061279 | 3.214262387 | 0.070899715 |
| 0.624722666 | 2.055848988 | 0.628988877 | 0           | 1.136329056 |
| 0           | 0.855767352 | 0.427187719 | 1.690927586 | 0           |
| 3.198699433 | 1.607590832 | 2.026544544 | 0.004674911 | 0.004245211 |
| 1.170640129 | 3.015779686 | 0.052191621 | 1.777120775 | 0.036121614 |
| 1.852243604 | 1.212819854 | 0.070004972 | 0.053296271 | 0.04788887  |
| 1.136057065 | 0.030025527 | 0.041295704 | 1.738936219 | 2.155892564 |
| 0.0825029   | 1.276609087 | 0.092864356 | 0.069914198 | 0.062599257 |
| 1.623078846 | 3.040399215 | 0.009397769 | 1.621369294 | 3.209609423 |
| 3.718101701 | 0.020527045 | 0.028006649 | 1.090112655 | 0.019697966 |
| 0.072095106 | 0.057484896 | 1.259768954 | 0.061288636 | 0.054976591 |
| 4.256997605 | 1.604063764 | 2.682598667 | 0.698333957 | 0           |
| 3.383241477 | 1.144878023 | 0.046650617 | 0.035929736 | 1.142822605 |
| 3.980044802 | 0           | 3.291092077 | 0.639287729 | 0           |
| 1.857882729 | 1.199491284 | 0           | 2.342877543 | 0           |
| 0.061240579 | 0.049049938 | 0.068561817 | 1.213025164 | 0.046945635 |
| 3.931899458 | 0           | 0.613304622 | 2.230709336 | 0           |
| 0.036686711 | 0.029687626 | 1.747295566 | 1.737244723 | 0.02846444  |
| 0.038443925 | 1.133373984 | 0.042793354 | 2.986385115 | 0.029801862 |
| 0.143407605 | 0.111109045 | 2.632732318 | 0.119331868 | 0.105754845 |
| 2.08814526  | 1.065070046 | 4.011049728 | 0.015956034 | 0.0144535   |
| 1.923517431 | 0.944085085 | 2.50103429  | 1.517093452 | 0           |
| 1.684750785 | 1.423801385 | 0           | 1.050850065 | 1.062792189 |
| 2.590504042 | 0.000877772 | 0.001178098 | 2.32701789  | 2.00471593  |
| 0.271541266 | 0.200457299 | 0.32096824  | 0.217862505 | 0.189357238 |
| 1.623585777 | 0.139636786 | 0.211381554 | 3.296883452 | 0.132579862 |
| 1.968341992 | 0           | 0.753211295 | 0.755186003 | 0           |
| 0.014919632 | 1.646939354 | 1.055143636 | 1.053663082 | 0.01170255  |
| 0.108455804 | 0.085205552 | 0.122884946 | 2.773297334 | 0.081285139 |
| 2.666213108 | 0.684866247 | 0           | 1.572796463 | 0           |
| 2.084343097 | 0.014397448 | 0.019542736 | 0.015258549 | 0.013823808 |
| 0.05492798  | 1.188112574 | 5.729776344 | 0.04694158  | 0.042236376 |
| 0           | 0           | 0.647655069 | 0.648606811 | 0           |
| 1.394972253 | 0           | 1.394460528 | 1.802637712 | 0           |
| 1.153101314 | 0           | 0           | 0.659773646 | 0           |
| 0           | 0.843222035 | 0           | 2.584236504 | 0           |
| 0.309873964 | 0.225641637 | 2.031214025 | 0.246034472 | 0.21271074  |
| 2.184265083 | 0           | 0           | 2.672455849 | 1.47184638  |
| 0.086842194 | 0.068825712 | 0.097856293 | 1.296706944 | 0.065755225 |
| 0           | 0           | 2.518785795 | 0           | 0           |
| 1.445122066 | 0.608988043 | 0.605049112 | 2.216710778 | 0           |
| 1.271358592 | 0.060152831 | 0.084886826 | 1.886256007 | 0.057514224 |
| 5.085386888 | 0.052028554 | 1.235128196 | 0.055429497 | 0.049782972 |
| 3.115881783 | 1.586142414 | 1.651303001 | 0.155075745 | 0.136444425 |
| 2.432223387 | 0.077172572 | 4.506512863 | 1.331657961 | 0.07367454  |
| 1.355757766 | 3.910198656 | 0.815243123 | 0           | 0           |
| 3.954929767 | 0.916743499 | 2.40350382  | 1.771262658 | 0.475105204 |
| 0.105244044 | 0.082789362 | 1.374135065 | 0.088574634 | 0.078997115 |
| 1.675947299 | 0.151559145 | 1.687037307 | 3.078375475 | 0.143753215 |
| 1.357067605 | 1.965781806 | 0.113877461 | 0.084869985 | 0.075751658 |
| 1.343259161 | 1.951831127 | 0.109132318 | 1.962360796 | 0.07281171  |
| 3.663967771 | 0.484193174 | 0.919119496 | 1.555166633 | 0           |
| 0.116492707 | 0.091224821 | 0.132262059 | 0.097711969 | 0.086980952 |

| hsa-miR-524-3p | hsa-miR-376b-5p | hsa-miR-517b-3p | hsa-miR-517a-3p | hsa-miR-5589-3p |
|----------------|-----------------|-----------------|-----------------|-----------------|
| 0.086538945    | 3.099646078     | 0.137806029     | 0.137805711     | 5.469985715     |
| 0.005359911    | 0.006425425     | 0.007789689     | 0.007789675     | 7.190881663     |
| 0              | 2.107056143     | 0               | 0               | 0               |
| 0              | 1.415786214     | 4.356034611     | 4.356034683     | 3.682796379     |
| 0.012233939    | 1.653963593     | 1.057954509     | 1.057954577     | 3.086147055     |
| 0.025468279    | 1.727456504     | 0.037839368     | 0.037839297     | 4.889094202     |
| 0.158012005    | 1.733367648     | 5.720246887     | 5.720245664     | 0.270737038     |
| 0              | 1.037201984     | 0               | 0               | 0               |
| 0              | 0               | 0               | 0               | 4.46179571      |
| 0              | 1.945986798     | 0               | 0               | 0               |
| 0.086408503    | 1.405088448     | 0.137577399     | 0.137577081     | 6.703290895     |
| 0.073809733    | 2.758630061     | 0.115814759     | 0.115814502     | 3.673475165     |
| 0              | 0.950770136     | 0.951042673     | 0.951042617     | 4.56448882      |
| 0.052189052    | 1.245909347     | 2.322884307     | 2.322884511     | 1.249373597     |
| 0              | 1.547086687     | 0               | 0               | 4.408933887     |
| 1.262407163    | 0.073388562     | 4.749889223     | 4.749888983     | 0.091241912     |
| 0              | 1.601771152     | 5.674560077     | 5.674560401     | 5.695701299     |
| 0              | 0               | 0               | 0               | 0               |
| 0.096844928    | 5.94645332      | 0.156088975     | 0.156088602     | 3.44650434      |
| 0              | 3.407316154     | 0               | 0               | 5.18869364      |
| 0.257407163    | 0.347657269     | 0.508334406     | 0.508332418     | 5.367272773     |
| 0.085868257    | 2.489926349     | 0.136631226     | 0.136630911     | 0.13524968      |
| 0              | 6.153780686     | 0.887430615     | 0.887430489     | 4.207978286     |
| 0.141804925    | 2.331003418     | 0.241214616     | 0.241213953     | 5.131890892     |
| 0              | 3.966836346     | 0               | 0               | 0               |
| 0              | 1.921830579     | 2.609977203     | 2.609976922     | 3.162507433     |
| 0.007942483    | 1.037674764     | 1.037612791     | 1.037612835     | 2.050210888     |
| 0.132347931    | 0.168549939     | 0.222549182     | 0.222548588     | 1.641103592     |
| 0.03922773     | 0.047791508     | 0.059181611     | 0.059181494     | 1.810857839     |
| 0              | 1.326365904     | 0               | 0               | 5.449073173     |
| 0.089431135    | 3.115556708     | 0.142892946     | 0.142892613     | 5.087377939     |
| 3.95228387     | 0.029953961     | 8.707014954     | 8.707014716     | 1.728061174     |
| 7.008228023    | 1.212256359     | 12.17368299     | 12.17368251     | 0.067723371     |
| 1.199608953    | 2.508671865     | 5.130602586     | 5.130602866     | 6.114522503     |
| 0              | 0.750156351     | 1.275936333     | 1.275936051     | 4.931446081     |
| 0              | 3.401533602     | 3.031503654     | 3.031503577     | 0               |
| 0.073478517    | 0.090993281     | 0.115251051     | 0.115250796     | 6.738358939     |
| 0.01286502     | 1.657494773     | 1.060947094     | 1.060947166     | 6.345678213     |
| 0.034578704    | 1.163363367     | 0.051897577     | 0.051897476     | 2.816839556     |
| 0.018940626    | 1.691352671     | 0.027938985     | 0.027938934     | 5.229361724     |
| 0              | 0               | 0               | 0               | 4.006206964     |
| 0.005346245    | 0.006409001     | 1.025313197     | 1.025313226     | 6.500403975     |
| 2.468969859    | 0.114425454     | 7.922531792     | 7.922530856     | 6.627531016     |
| 0.126734276    | 0.160971181     | 0.211666837     | 0.211666282     | 4.439320836     |
| 4.025230434    | 0.135378399     | 6.373287592     | 6.373286687     | 0.173666839     |
| 0              | 1.482720855     | 0               | 0               | 5.504561783     |
| 0.175130138    | 0.227597611     | 0.310491157     | 0.310490211     | 0.306354485     |
| 0.078580127    | 1.368811881     | 0.123981135     | 0.123980856     | 4.550711686     |
| 3.38566536     | 0.851049819     | 9.012785232     | 9.012785511     | 4.611838228     |
| 0.142835929    | 2.336068629     | 0.243275187     | 0.243274516     | 5.054523463     |
| 0.070273817    | 1.968214215     | 3.476260075     | 3.476260079     | 5.457496899     |
| 0              | 3.610697864     | 0               | 0               | 4.377745113     |
| 0              | 2.289684274     | 0               | 0               | 1.014866438     |
| 0.110975767    | 2.177519063     | 0.181879383     | 0.181878929     | 3.912087241     |
| 0.02281072     | 0.027573803     | 2.142853384     | 2.142853481     | 4.813081241     |
| 0              | 0               | 0               | 0               | 4.879646304     |

|             |             |             |             |             |
|-------------|-------------|-------------|-------------|-------------|
| 0.076723532 | 0.095158821 | 0.120792263 | 0.120791993 | 3.69246026  |
| 0           | 1.127357104 | 0.638943356 | 0.638942991 | 1.490820739 |
| 0.005031556 | 2.030548509 | 0.00730987  | 0.007309857 | 3.737440556 |
| 1.058650051 | 0.015715485 | 3.262868223 | 3.262868233 | 6.228459447 |
| 0           | 1.871109265 | 0           | 0           | 3.260883642 |
| 6.38791268  | 3.849070133 | 11.25020477 | 11.25020409 | 1.298011609 |
| 0.005014234 | 0.00601004  | 4.896059094 | 4.896059074 | 1.614113942 |
| 0           | 3.579800872 | 0           | 0           | 1.122964192 |
| 0           | 3.080691561 | 0.752560849 | 0.752560585 | 4.163065918 |
| 0.000282886 | 2.32371629  | 0.000408865 | 0.000408864 | 6.509974863 |
| 0.109150477 | 1.510024756 | 0.178499956 | 0.178499513 | 5.56766828  |
| 0           | 1.470377093 | 0           | 0           | 4.844814607 |
| 0.138304577 | 2.313775186 | 0.234256672 | 0.234256035 | 7.123964705 |
| 0           | 2.802979469 | 0           | 0           | 3.865696579 |
| 0.936975225 | 1.505418666 | 7.723489515 | 7.723489632 | 5.724589558 |
| 0.029442002 | 1.139203479 | 0.043936362 | 0.043936278 | 3.530484407 |
| 0.031836657 | 1.150471119 | 0.047636492 | 0.0476364   | 5.235431956 |
| 0.154550882 | 0.198908649 | 0.267051486 | 0.267050722 | 3.804212953 |
| 0           | 1.761435997 | 1.362551747 | 1.362551543 | 3.874312027 |
| 0           | 0           | 0.817104107 | 0.817103906 | 5.243709049 |
| 0.02525773  | 2.477799024 | 3.640280239 | 3.640280227 | 0.03720681  |
| 0.119701546 | 0.151531509 | 0.198236366 | 0.198235857 | 6.856752863 |
| 0           | 2.305726349 | 0           | 0           | 2.28454887  |
| 0.037555906 | 1.177349193 | 0.056553546 | 0.056553435 | 7.35588976  |
| 0.107814243 | 1.503877175 | 0.176035132 | 0.176034697 | 4.993730212 |
| 0           | 0.981752511 | 0           | 0           | 3.293966384 |
| 0           | 0           | 0           | 0           | 2.215797134 |
| 0.014869567 | 2.679528272 | 0.021835965 | 0.021835925 | 2.420014782 |
| 0           | 1.986134285 | 0           | 0           | 1.262018508 |
| 0           | 2.050354252 | 0           | 0           | 2.040095198 |
| 0.080096052 | 1.375842975 | 0.126594947 | 0.126594661 | 4.886529381 |
| 0           | 0           | 0           | 0           | 0.658736973 |
| 0.193214335 | 0.253248671 | 0.350521424 | 0.350520295 | 4.243826729 |
| 0.000307821 | 0.000368126 | 0.000444916 | 0.000444915 | 0.00044153  |
| 0.15820046  | 2.411068788 | 0.274597143 | 0.274596349 | 4.636677208 |
| 0.124242163 | 0.157619167 | 0.206882036 | 0.206881498 | 7.307335618 |
| 0           | 0.875213786 | 0           | 0           | 6.184326303 |
| 1.638700921 | 2.385870829 | 7.570264728 | 7.57026464  | 8.533357199 |
| 0           | 3.245107217 | 0           | 0           | 1.594097755 |
| 0           | 2.506170221 | 0.584884876 | 0.584884469 | 0           |
| 0           | 1.41085002  | 0           | 0           | 4.349683456 |
| 1.265650664 | 1.284304263 | 7.197231682 | 7.197231141 | 5.829963775 |
| 0           | 0           | 0           | 0           | 4.810333256 |
| 0.014844129 | 2.679368986 | 1.070334172 | 1.070334255 | 4.109316653 |
| 0           | 0.673000641 | 0           | 0           | 1.548451179 |
| 0           | 2.746311473 | 0           | 0           | 0           |
| 0           | 3.154489639 | 0.989063595 | 0.989063583 | 2.569080756 |
| 0           | 1.267289002 | 3.739438379 | 3.739438415 | 6.412498413 |
| 0           | 0           | 1.573591346 | 1.573590845 | 3.901386415 |
| 0           | 1.820887894 | 0           | 0           | 3.191020908 |
| 0.008273742 | 2.050095045 | 0.01206266  | 0.012062639 | 2.641396728 |
| 0           | 0.981748419 | 0.985026713 | 0.98502619  | 0.530002023 |
| 0           | 3.994102595 | 0           | 0           | 3.396920169 |
| 0           | 4.693291209 | 0           | 0           | 0           |
| 3.402427901 | 1.524579695 | 6.845723651 | 6.845724153 | 2.053470092 |
| 0.010479029 | 1.049687692 | 0.015314675 | 0.015314647 | 1.645782477 |
| 0.017088039 | 4.020207644 | 5.172992468 | 5.172992386 | 4.650735118 |
| 0           | 2.037250364 | 0           | 0           | 4.118201421 |

|             |             |             |             |             |
|-------------|-------------|-------------|-------------|-------------|
| 0.168539435 | 0.218351791 | 0.296340749 | 0.296339864 | 5.454122711 |
| 0           | 1.830502998 | 0           | 0           | 1.642660577 |
| 0           | 1.353569212 | 1.743097624 | 1.743097432 | 5.513174746 |
| 0           | 2.221414429 | 2.038047454 | 2.038046995 | 3.197434769 |
| 0.020135994 | 1.697985096 | 4.054294341 | 4.054294306 | 2.721219319 |
| 0.069697267 | 0.086155321 | 1.982497416 | 1.982497758 | 0.107800745 |
| 0           | 2.031616594 | 2.014538909 | 2.01453859  | 4.203836566 |
| 0           | 3.16371563  | 1.172375351 | 1.172374727 | 0           |
| 0.004182846 | 2.025414065 | 0.006071254 | 0.006071244 | 5.031766293 |
| 0.035551306 | 0.043236621 | 0.05341522  | 0.053415116 | 2.553729055 |
| 0.047113647 | 4.887569152 | 0.071711034 | 0.071710889 | 1.855761935 |
| 4.557438414 | 1.743253221 | 10.17951535 | 10.17951506 | 5.380559571 |
| 0.061554925 | 2.959130641 | 0.095238225 | 0.095238022 | 1.294487308 |
| 0.006594796 | 1.031288452 | 3.04663014  | 3.04663015  | 5.372069344 |
| 0.01939805  | 0.023410411 | 0.028628132 | 0.028628079 | 6.504024642 |
| 0.05407349  | 2.31567246  | 0.082954322 | 0.08295415  | 6.83852969  |
| 0           | 1.588343741 | 0.69958222  | 0.699581906 | 1.580266441 |
| 0.031897585 | 0.038725524 | 3.221397316 | 3.221397345 | 6.32520216  |
| 0           | 2.047240667 | 0           | 0           | 0           |
| 0           | 0           | 3.62696023  | 3.626960252 | 3.056314624 |
| 0.046187179 | 2.271249807 | 0.070227558 | 0.070227416 | 4.237333388 |
| 3.129942792 | 0.610385951 | 7.05821524  | 7.058215812 | 0.615240115 |
| 0.028022475 | 1.13252029  | 4.666200741 | 4.666200641 | 5.014779282 |
| 0.029337766 | 0.035574304 | 0.043775745 | 0.043775661 | 4.213334742 |
| 0.103840095 | 4.533426657 | 0.168749732 | 0.16874932  | 2.175821603 |
| 0.01423605  | 2.410699256 | 0.02089113  | 0.020891092 | 3.100091082 |
| 0           | 1.515543435 | 0           | 0           | 0           |
| 0           | 0.569706375 | 0.57706756  | 0.577067147 | 1.397604584 |
| 2.812305349 | 1.58968615  | 6.621145403 | 6.621145397 | 5.135630542 |
| 0.185430821 | 0.242157679 | 0.33307211  | 0.333071063 | 5.231275864 |
| 0.130065116 | 0.165463305 | 0.218106307 | 0.218105729 | 6.256346305 |
| 0           | 1.28051235  | 0           | 0           | 5.506344706 |
| 0.011527602 | 0.013859904 | 0.016866444 | 0.016866413 | 3.891967811 |
| 0.079878566 | 0.099220987 | 0.126219392 | 0.126219106 | 0.12496731  |
| 0           | 0           | 0.683107526 | 0.683107198 | 8.515563325 |
| 0.013616133 | 0.016387303 | 0.019967844 | 0.019967808 | 4.006983995 |
| 0.041560742 | 2.244950667 | 0.062865441 | 0.062865316 | 2.862506388 |
| 0           | 0           | 0           | 0           | 4.899535442 |
| 0           | 1.797754871 | 0           | 0           | 0.847080436 |
| 0           | 1.532713049 | 0           | 0           | 1.155950605 |
| 0           | 2.10095907  | 0           | 0           | 4.776820665 |
| 0.208150318 | 3.103939577 | 0.384971107 | 0.38496981  | 5.276302537 |
| 3.040733195 | 3.027953227 | 7.549162962 | 7.549163132 | 5.944836883 |
| 0.064651304 | 0.079725849 | 0.100383299 | 0.100383083 | 5.751827212 |
| 0           | 2.522442082 | 0           | 0           | 2.257780728 |
| 0           | 1.086544611 | 0           | 0           | 0           |
| 1.249156365 | 1.895789513 | 0.087021411 | 0.087021229 | 2.686860561 |
| 0.048973901 | 2.287005022 | 1.865457784 | 1.865458032 | 3.93085842  |
| 0.133839622 | 1.623221648 | 3.442466283 | 3.442466307 | 3.44187551  |
| 5.565806305 | 3.443500333 | 10.18582853 | 10.18582773 | 3.06061065  |
| 0           | 0           | 0           | 0           | 3.288818067 |
| 0           | 0.902520772 | 0.474842048 | 0.47484157  | 2.403946729 |
| 0.07763611  | 0.096332552 | 0.122358007 | 0.122357732 | 5.50723884  |
| 0.140975638 | 0.18027397  | 0.239560892 | 0.239560235 | 3.720909332 |
| 0.074454712 | 1.349662094 | 0.116913694 | 0.116913434 | 6.28954653  |
| 0.071572206 | 0.088552091 | 0.112014903 | 0.112014657 | 7.284689851 |
| 0           | 2.714936545 | 0           | 0           | 5.79764894  |
| 0.085459483 | 1.400695003 | 3.906079148 | 3.906079023 | 5.462799296 |

| hsa-miR-410-3p | hsa-miR-520d-5p | hsa-miR-301b-5p | hsa-miR-412-5p | hsa-miR-6720-3p |
|----------------|-----------------|-----------------|----------------|-----------------|
| 7.210318818    | 0.097048945     | 0.093979842     | 2.871717053    | 2.411528049     |
| 5.626140467    | 0.005896366     | 2.353901511     | 5.170196102    | 0.004664691     |
| 7.872193544    | 0               | 1.809301662     | 5.986984783    | 0.396370137     |
| 6.240879037    | 0               | 3.266991315     | 2.124384284    | 0               |
| 3.256814305    | 0.013480583     | 0.013121199     | 3.789924964    | 0.010624474     |
| 6.192603274    | 0.028152403     | 0.027376854     | 4.357121288    | 1.107964318     |
| 5.665834206    | 0.180144376     | 0.173600913     | 4.640906841    | 0.131610619     |
| 6.277709823    | 0               | 3.029876369     | 5.631091449    | 0               |
| 3.78047163     | 0               | 0               | 0.768777191    | 0               |
| 7.306174492    | 0               | 4.068547509     | 5.764006607    | 0               |
| 3.146721558    | 0.096899707     | 0.093836162     | 1.411315612    | 0.073404804     |
| 5.28459409     | 0.082527386     | 0.079987306     | 6.025420707    | 1.303620438     |
| 6.027304398    | 0               | 1.527967733     | 4.505449099    | 0               |
| 5.023511664    | 0.058056576     | 2.288124553     | 4.624238037    | 0.044778949     |
| 4.534178602    | 0               | 0               | 4.993173515    | 0               |
| 5.683372061    | 1.2724982       | 0.064494713     | 4.330727157    | 0.051071506     |
| 4.659848689    | 2.57328468      | 1.229840279     | 4.914215722    | 0               |
| 2.026708118    | 0               | 2.30405315      | 3.128998169    | 0.808250006     |
| 9.747157012    | 0.10886793      | 1.432448629     | 8.588883055    | 0.082026759     |
| 7.270496545    | 0               | 0               | 5.110481749    | 0.966759509     |
| 4.989869213    | 0.29998654      | 0.287185216     | 0.514344555    | 0.209116696     |
| 4.601474352    | 0.09628171      | 0.093241155     | 4.049950791    | 1.350642834     |
| 10.88203429    | 0               | 0.889288537     | 7.848234752    | 0               |
| 4.965403878    | 0.161071631     | 0.155391275     | 3.930261407    | 0.118624533     |
| 10.36243816    | 0               | 0.866496674     | 8.663714275    | 0               |
| 6.556247815    | 0               | 0.888222406     | 6.136987727    | 1.56094737      |
| 4.451955547    | 0.008742832     | 3.048950425     | 3.75875152     | 0.006906748     |
| 3.148201627    | 0.150004506     | 0.144807354     | 3.871219579    | 0.110997699     |
| 4.679029836    | 0.0435042       | 0.042265614     | 1.185544944    | 0.033788307     |
| 4.400644866    | 0               | 1.729950715     | 4.290452984    | 0               |
| 4.319607662    | 0.100360152     | 2.477419682     | 4.530325919    | 0.075907009     |
| 2.976973928    | 4.739269109     | 1.717418583     | 2.751580985    | 1.705636865     |
| 2.277480065    | 6.714307174     | 0.048530225     | 3.309406174    | 0.038691846     |
| 5.673880618    | 0               | 0.680398797     | 1.553389743    | 1.604032001     |
| 4.383969014    | 0               | 0.75511084      | 1.27689213     | 0               |
| 7.898761413    | 0.738968278     | 3.52286272      | 6.422052368    | 0               |
| 3.065422965    | 0.082150662     | 0.079623987     | 2.002492464    | 0.06265349      |
| 5.141828443    | 0.014178114     | 0.013799532     | 2.672205508    | 0.011170357     |
| 5.813005578    | 0.038306007     | 0.037227344     | 5.256435604    | 0.029825623     |
| 5.352428692    | 0.020904193     | 0.020337479     | 3.304001735    | 1.080623736     |
| 4.079424371    | 0               | 0               | 2.36721522     | 0               |
| 4.94758225     | 0.005881313     | 2.030921559     | 4.039792042    | 0.004652817     |
| 3.788710756    | 3.098613947     | 0.09956571      | 3.180637526    | 0.077704793     |
| 4.313023043    | 0.143456791     | 0.138539353     | 0.213338526    | 0.106452849     |
| 4.547468824    | 3.40573807      | 0.117213206     | 4.049003542    | 0.090828538     |
| 4.861109013    | 0               | 1.894541847     | 3.45194883     | 0.922522413     |
| 5.834956417    | 0.200434095     | 2.42896187      | 3.408012556    | 0.145214243     |
| 5.518018626    | 0.08795957      | 1.353054332     | 4.552877454    | 0.066904769     |
| 5.95822074     | 5.110012078     | 0               | 3.462376208    | 0               |
| 5.793967434    | 0.16228094      | 0.156546995     | 4.272854641    | 0.119453792     |
| 5.148442542    | 0.07850861      | 1.948093929     | 3.046316602    | 0.059976694     |
| 7.345594082    | 0               | 0               | 3.050492648    | 0.763873587     |
| 6.392723536    | 0               | 1.388243841     | 5.2156976      | 0.571189643     |
| 5.992317026    | 0.125162972     | 0.121002443     | 6.935541592    | 0.093623171     |
| 4.693093998    | 0.025198779     | 1.707196274     | 3.623038393    | 0.01974561      |
| 4.800705332    | 0               | 0               | 0.785355144    | 0               |

|             |             |             |             |             |
|-------------|-------------|-------------|-------------|-------------|
| 5.505386615 | 0.085843999 | 0.083185204 | 4.791748414 | 0.065359038 |
| 5.534725697 | 0           | 1.514198384 | 4.904424663 | 1.164910707 |
| 7.333668746 | 0.005534711 | 2.029111072 | 5.593198888 | 0.004379372 |
| 4.683023397 | 0.014395189 | 0.014010621 | 2.673525656 | 0.011340162 |
| 6.493027668 | 0           | 1.362465718 | 3.4160942   | 0           |
| 10.80853904 | 7.464617419 | 1.281389567 | 9.566430906 | 0.053282941 |
| 4.124880622 | 0.005515634 | 2.615421582 | 4.359621164 | 0.004364319 |
| 10.63884924 | 0           | 3.146222433 | 8.982726289 | 0           |
| 5.776104432 | 0           | 0           | 4.742068761 | 0           |
| 0.000413063 | 0.00031082  | 1.00130493  | 2.586897344 | 0.000246583 |
| 4.659596276 | 0.12305231  | 2.133686192 | 0.179833148 | 1.439562019 |
| 5.33490133  | 0           | 0           | 1.872934222 | 0           |
| 4.386500711 | 0.156969977 | 0.151470225 | 0.236175426 | 0.115805884 |
| 6.144238066 | 0           | 2.982191892 | 5.836097906 | 0           |
| 6.723157682 | 2.497500839 | 0           | 5.213598521 | 0.939716624 |
| 5.429605599 | 0.032575759 | 2.166153184 | 2.782548827 | 0.025434475 |
| 5.447015038 | 0.035245388 | 0.034259386 | 4.231612954 | 0.027483241 |
| 4.619227403 | 0.176060037 | 0.16970461  | 5.135263766 | 0.128846185 |
| 5.187287761 | 0           | 2.341770212 | 3.172798985 | 2.104820883 |
| 5.686086337 | 0           | 1.366520165 | 4.777263071 | 0           |
| 4.646477143 | 0.027918262 | 1.115544553 | 4.646456521 | 0.021847507 |
| 3.353287593 | 0.135276768 | 0.130702277 | 1.573297362 | 1.479084571 |
| 6.697088399 | 0           | 1.178814764 | 4.584027054 | 0           |
| 5.924039796 | 0.041633583 | 0.040452915 | 0.056887492 | 0.032364555 |
| 6.520358743 | 0.121508258 | 0.117494564 | 5.615497894 | 1.434523083 |
| 7.429334624 | 0           | 0.982262029 | 5.099693944 | 0           |
| 5.219914759 | 0           | 1.290481847 | 5.003734392 | 0.770529117 |
| 8.502458677 | 0.016395122 | 0.015955133 | 6.380345238 | 1.063457561 |
| 5.633502643 | 0           | 1.808370714 | 5.289062013 | 2.073673991 |
| 10.29410133 | 0           | 0.807789762 | 7.680149772 | 0           |
| 4.46832626  | 0.089688287 | 2.763030698 | 0.127455902 | 0.068165681 |
| 1.819713396 | 0           | 0.660597984 | 1.818119388 | 1.577202707 |
| 3.514101048 | 0.222029094 | 0.213458597 | 2.674812741 | 0.159464671 |
| 6.250317727 | 0.000338219 | 2.001789859 | 4.757234787 | 0.000268316 |
| 4.209897642 | 0.18036694  | 0.17381318  | 1.764391079 | 0.131761004 |
| 5.385738202 | 0.140555209 | 0.135760248 | 3.820431111 | 0.10443097  |
| 3.799152327 | 0           | 0           | 3.885794139 | 0           |
| 6.487978513 | 3.233961438 | 2.646610475 | 5.601514617 | 0.008876439 |
| 10.48232931 | 0           | 1.921444783 | 7.680412547 | 0.724387598 |
| 8.85744614  | 0           | 0           | 5.903192449 | 0           |
| 7.033467395 | 0           | 0           | 5.118405578 | 0.868122831 |
| 6.711081804 | 2.33571026  | 0.065322034 | 1.929065936 | 1.868679339 |
| 4.859005765 | 0           | 0.971253519 | 3.654194753 | 0           |
| 8.284149597 | 0.016366975 | 1.068143835 | 6.157620573 | 0.012880911 |
| 7.567714382 | 0           | 0           | 6.497474596 | 0           |
| 7.014600975 | 0           | 0           | 2.731525753 | 1.39346979  |
| 10.11887041 | 0           | 1.572322164 | 8.521104675 | 1.573354083 |
| 6.195503059 | 0           | 1.276517497 | 5.228040786 | 0.75981459  |
| 5.512349584 | 0           | 1.319019859 | 4.255283819 | 0           |
| 7.553014785 | 0           | 3.298863901 | 6.114762186 | 0           |
| 5.522723692 | 0.009108194 | 1.629822823 | 4.521646479 | 0.007194071 |
| 2.877963738 | 0           | 0           | 0           | 0.547236974 |
| 10.13445463 | 0           | 0           | 8.075934103 | 0           |
| 12.79381081 | 0           | 4.016305301 | 12.29605556 | 1.872694571 |
| 6.007265357 | 2.300381055 | 0.656721804 | 5.111158913 | 1.571914072 |
| 4.400281782 | 0.011541995 | 0.011235655 | 2.880034281 | 2.054594673 |
| 8.510603343 | 0.0188512   | 1.078385906 | 2.925320508 | 1.668955417 |
| 5.235739603 | 0           | 3.409128827 | 3.749658566 | 1.758392421 |

|             |             |             |             |             |
|-------------|-------------|-------------|-------------|-------------|
| 5.039827286 | 0.192604751 | 0.185476954 | 6.104808544 | 0.139990088 |
| 5.954872638 | 0           | 0           | 5.285582049 | 2.097484856 |
| 5.585097926 | 0           | 1.360931293 | 3.777164252 | 0           |
| 5.703147784 | 0           | 1.917189956 | 4.581535722 | 1.244425759 |
| 5.578502502 | 0.022229833 | 1.092273125 | 5.105351982 | 0.017444546 |
| 3.802170422 | 0.077853948 | 2.977942783 | 3.47227763  | 1.287426889 |
| 5.789376855 | 1.126893222 | 2.766301313 | 4.510382162 | 0           |
| 8.907419168 | 0           | 1.190825603 | 5.076168512 | 0           |
| 5.491560298 | 0.004600193 | 0.004480046 | 3.352163082 | 1.017971752 |
| 5.512491352 | 0.039392558 | 1.16207075  | 5.351200341 | 1.14975523  |
| 11.47626916 | 0.052347631 | 2.261356464 | 10.70827369 | 1.197029139 |
| 5.672182142 | 4.760737232 | 1.12951141  | 5.299031742 | 0.024490851 |
| 7.846272273 | 0.068627035 | 1.905096146 | 8.022383778 | 0.052669351 |
| 5.298326668 | 1.03059858  | 1.030357642 | 1.623035304 | 0.005737203 |
| 5.145920184 | 0.021411378 | 2.924318797 | 4.536472831 | 0.016809035 |
| 4.977323452 | 0.060179682 | 0.058406598 | 1.893358078 | 1.225157533 |
| 6.496082682 | 0           | 1.217940754 | 4.474001219 | 5.554569047 |
| 5.143846553 | 0.035313352 | 2.179574614 | 4.232044831 | 1.739256616 |
| 6.193062266 | 0           | 0.641870818 | 4.9401173   | 0.657780311 |
| 4.148858465 | 0           | 1.580106695 | 4.034801795 | 0.699891685 |
| 5.38418657  | 0.051306976 | 1.209802015 | 5.956131022 | 0.039700003 |
| 4.070468765 | 2.990066821 | 1.109178093 | 3.903344421 | 0.632860831 |
| 6.044050126 | 0.030994656 | 2.158365281 | 4.204497548 | 0.024218597 |
| 3.668530125 | 0.032459622 | 1.134025033 | 3.668798292 | 0.025345228 |
| 10.17062232 | 0.116921498 | 0.113090003 | 9.665759839 | 0.087778345 |
| 6.29877569  | 0.01569423  | 0.015273719 | 6.237991161 | 0.012355566 |
| 5.5489529   | 0           | 0           | 4.491678171 | 0           |
| 4.616480984 | 0           | 2.668484525 | 3.880606814 | 0           |
| 6.156196499 | 2.326979145 | 0.000890142 | 3.465505503 | 1.589124706 |
| 2.626050094 | 0.212714436 | 0.204610084 | 3.995887535 | 0.153346152 |
| 2.782565985 | 0.147339899 | 2.229750035 | 3.85693435  | 0.109151111 |
| 5.742264088 | 0           | 3.642535613 | 4.106956131 | 0           |
| 5.257504886 | 0.012700122 | 1.052977562 | 4.40805696  | 0.010013243 |
| 3.105752944 | 0.089440198 | 0.086651266 | 2.03838169  | 0.067984846 |
| 5.680852891 | 0           | 0           | 3.909194931 | 0.698823678 |
| 5.563050866 | 0.015008589 | 1.658468312 | 4.625586111 | 0.011819792 |
| 4.695522545 | 0.046117084 | 0.044796906 | 4.827553314 | 1.174411033 |
| 5.099932494 | 0           | 1.5316753   | 3.107378059 | 0           |
| 5.522724046 | 0           | 0.849806672 | 4.952816519 | 1.417354112 |
| 6.526885572 | 0           | 0.662295473 | 4.355669904 | 0           |
| 5.052166361 | 0           | 0.842676276 | 4.257981375 | 0           |
| 3.241424099 | 0.239987655 | 0.230494173 | 0.388885926 | 0.171144004 |
| 5.943652165 | 3.768914877 | 1.469609282 | 4.881639313 | 0           |
| 4.154783936 | 0.072131765 | 1.291844442 | 3.010565825 | 0.055268601 |
| 6.094814562 | 0           | 0.95568591  | 5.510317988 | 0           |
| 6.355056891 | 0           | 0.608026893 | 4.612372993 | 3.260161052 |
| 5.269639236 | 0.062989078 | 1.25603961  | 4.403888395 | 0.048470439 |
| 4.257336929 | 0.054438522 | 1.22225087  | 5.56926491  | 0.042060415 |
| 4.487933897 | 0.151747123 | 1.590341753 | 0.227286435 | 0.112203167 |
| 8.964914916 | 5.378456258 | 0.078461202 | 9.960755513 | 0.061768403 |
| 5.855375808 | 0           | 0           | 5.815224757 | 0           |
| 5.670585957 | 0           | 1.987242633 | 3.482972366 | 0           |
| 3.091642656 | 0.086883648 | 1.983992787 | 2.475025152 | 0.066119017 |
| 5.882727108 | 0.160099318 | 0.154461936 | 5.780057513 | 0.117957205 |
| 5.117477671 | 0.083261147 | 1.334985708 | 6.51697351  | 0.063467917 |
| 4.594533978 | 0.079983546 | 1.954451756 | 1.991793957 | 1.294819813 |
| 10.04054652 | 0.481391888 | 2.190714179 | 5.301028994 | 0.501421039 |
| 4.29344771  | 0.095814208 | 1.383072641 | 3.142132692 | 0.072618321 |

| hsa-miR-6516-3p | hsa-miR-6734-5p | hsa-miR-561-5p | hsa-miR-432-5p | hsa-miR-1224-5p |
|-----------------|-----------------|----------------|----------------|-----------------|
| 1.355699975     | 1.975603464     | 2.025431156    | 5.828765727    | 0.110821363     |
| 0.004736542     | 1.611340776     | 0.00570506     | 4.741076876    | 0.006568154     |
| 1.151391526     | 0.399216678     | 0              | 7.088236397    | 2.368876063     |
| 0               | 1.435173081     | 0              | 5.32163167     | 0               |
| 0.010790493     | 1.051775981     | 0.01303554     | 3.673944586    | 3.40360682      |
| 1.108600121     | 0.021416219     | 1.720771676    | 4.997269976    | 0.031550865     |
| 0.134230014     | 1.610257652     | 0.172061295    | 3.826638397    | 0.210374406     |
| 1.448590019     | 0.590652441     | 1.41504609     | 5.184803377    | 1.394336547     |
| 0.780876049     | 1.72458858      | 0              | 2.449735259    | 0.764402196     |
| 0               | 1.288130164     | 0.737609068    | 5.62280085     | 3.286249895     |
| 1.983730617     | 1.3484315       | 0.093110707    | 4.694055926    | 0.110646469     |
| 1.305672509     | 0.061027528     | 0.079385135    | 5.780946175    | 1.349148398     |
| 0               | 0.955533143     | 0              | 4.874080757    | 0.950572512     |
| 1.833963996     | 1.21512349      | 0.055948801    | 3.825669722    | 4.143956148     |
| 0.971141132     | 1.965062945     | 0              | 4.197580069    | 0.968321825     |
| 1.867465037     | 0.049563286     | 0.06402392     | 4.121225009    | 0.07528466      |
| 0               | 0.72614149      | 0              | 3.318197298    | 1.218198331     |
| 0.807391049     | 0.809781597     | 3.514288664    | 0.796586608    | 0               |
| 0.083520415     | 1.387964936     | 0.104518599    | 10.14117137    | 0.12471641      |
| 0.966585612     | 0.96706787      | 0              | 6.55448623     | 0               |
| 0.213794588     | 0.201160473     | 0.284199718    | 4.197811188    | 0.361657186     |
| 0.074262375     | 0.070709148     | 4.391078109    | 4.601575269    | 1.40566676      |
| 1.461575456     | 0               | 0              | 10.4436151     | 0               |
| 0.120933855     | 0.114664689     | 0.154052795    | 3.206278035    | 0.18713918      |
| 0.873641659     | 0               | 0.866712443    | 9.706513951    | 1.41800897      |
| 0.917393217     | 1.278835087     | 0              | 5.639901691    | 0.444934908     |
| 0.007013714     | 2.040981332     | 1.036472539    | 4.146595636    | 1.630198108     |
| 2.605765717     | 2.157541835     | 0.143581696    | 2.797219714    | 3.584690762     |
| 1.165874685     | 1.770850916     | 0.041971089    | 3.981142895    | 1.186272724     |
| 0               | 0               | 0              | 3.653779363    | 1.717613256     |
| 0.077272919     | 0.07355521      | 2.039206503    | 4.530430279    | 1.422340088     |
| 1.706483671     | 1.103906334     | 0.026429638    | 2.154201277    | 0.03065758      |
| 1.189609937     | 0.037577798     | 0.048187496    | 1.841460912    | 2.26721151      |
| 0.694128619     | 0.697482335     | 0              | 5.235838296    | 0               |
| 0               | 0               | 0              | 4.10308429     | 1.663832077     |
| 1.287423508     | 1.686873997     | 0              | 7.005572125    | 0               |
| 0.063751486     | 0.060760516     | 1.329827591    | 0.116482934    | 0.093430381     |
| 0.011345133     | 0.010867481     | 0.013709302    | 4.851833567    | 0.015829199     |
| 2.17605258      | 1.144190189     | 1.768015777    | 4.339128773    | 1.164283199     |
| 1.678514907     | 1.079802997     | 4.508802799    | 5.569578038    | 1.692158242     |
| 2.144084833     | 0.864602546     | 0              | 3.569328205    | 2.117254303     |
| 0.004724483     | 2.02768289      | 0.005690502    | 3.946539814    | 0.006551359     |
| 1.375409066     | 1.368182616     | 0.098787652    | 3.179891974    | 2.084168955     |
| 0.108481225     | 0.102970725     | 1.558535069    | 4.313353409    | 1.59624351      |
| 1.436729545     | 0.08793705      | 5.115051748    | 4.438164501    | 0.139325948     |
| 0.922133289     | 1.90487087      | 0              | 3.673047022    | 0.914995386     |
| 0.14816963      | 0.140159123     | 0.191168264    | 4.136727077    | 0.235345284     |
| 1.324508061     | 0.064866754     | 0.084576249    | 4.458350679    | 0.10019475      |
| 1.421790562     | 2.407099873     | 0              | 5.582530486    | 0.850554528     |
| 0.121782597     | 0.11546085      | 0.155196013    | 4.876541877    | 0.188605577     |
| 0.061022048     | 0.058173999     | 0.07554205     | 4.669386339    | 0.089199989     |
| 0               | 0.765673735     | 1.282390974    | 6.454033387    | 0.745512343     |
| 1.423667732     | 0               | 0.554108654    | 5.796239858    | 1.012516374     |
| 1.449713771     | 0.090627936     | 2.913246633    | 6.895765539    | 1.522922314     |
| 1.697163859     | 0.019199789     | 0.024344854    | 3.973375051    | 0.028217956     |
| 0               | 1.346267182     | 0.786873514    | 4.38864158     | 0               |



|             |             |             |             |             |
|-------------|-------------|-------------|-------------|-------------|
| 1.317189976 | 0.063373994 | 0.082555053 | 4.629314019 | 2.780486012 |
| 0.653722974 | 0           | 0           | 4.963804695 | 1.496113027 |
| 1.610194403 | 0.004262476 | 0.005355288 | 6.324266023 | 0.006164685 |
| 1.056119821 | 0.011032563 | 0.013918965 | 3.679897136 | 0.016072505 |
| 1.398636829 | 0.556998198 | 1.363579324 | 5.018841728 | 0           |
| 0.05419884  | 2.300015881 | 0.066874349 | 10.15778799 | 1.295003501 |
| 2.026506477 | 1.609649425 | 5.353356016 | 3.20577374  | 0.006143406 |
| 0.65145969  | 0.655092421 | 1.136395721 | 10.14946    | 2.035135133 |
| 1.3041673   | 0           | 1.286315275 | 6.120398365 | 0           |
| 1.586388596 | 0.000240065 | 0.000300866 | 5.08963314  | 2.586808191 |
| 0.093840258 | 1.433942541 | 0.118013615 | 3.523341062 | 0.141507842 |
| 0           | 2.212265087 | 1.474712936 | 4.430465253 | 0           |
| 0.118049305 | 0.111958017 | 0.150173896 | 4.847606026 | 0.182172439 |
| 2.158134479 | 1.437667972 | 0           | 5.385473569 | 0           |
| 0           | 0.940262714 | 0           | 5.913200912 | 0           |
| 1.728766537 | 1.12318795  | 0.031454026 | 4.676713424 | 1.750615303 |
| 1.135228908 | 0.026710544 | 1.14499497  | 4.481200799 | 1.763852391 |
| 0.13139869  | 0.12447355  | 0.168208771 | 4.738673521 | 2.856479506 |
| 1.385823905 | 1.388989306 | 0.823730569 | 3.173054805 | 1.363538773 |
| 0.828381168 | 0           | 0           | 4.597641818 | 0           |
| 0.022198006 | 0.021240771 | 4.153820325 | 4.99573489  | 4.628380276 |
| 0.102640153 | 0.097477146 | 2.620574288 | 3.354129244 | 0.156080484 |
| 0           | 1.594366799 | 0           | 5.536003591 | 1.166327402 |
| 1.158966978 | 0.031445035 | 4.54696438  | 5.084528604 | 0.046831179 |
| 2.505646866 | 0.088137151 | 0.116545924 | 5.970922563 | 1.508187756 |
| 1.979459683 | 0           | 0           | 5.493807515 | 0           |
| 0.769542293 | 0           | 0.758429439 | 4.169169501 | 3.207020109 |
| 0.013105601 | 1.657349293 | 0.015850286 | 7.19089284  | 0.018315461 |
| 0           | 1.331757104 | 0           | 4.755801562 | 0.921345437 |
| 0.817430953 | 0.819720322 | 0           | 8.917502439 | 1.343614893 |
| 0.06937364  | 1.324271888 | 0.086227385 | 4.960845453 | 0.102211867 |
| 1.88104151  | 0           | 0.661005982 | 2.271094098 | 4.30036732  |
| 2.837582206 | 0.153794459 | 0.211448379 | 3.154915664 | 0.262209782 |
| 1.586514253 | 0.000261223 | 0.000327387 | 4.172239149 | 1.586723529 |
| 0.134384051 | 0.12726875  | 0.172271165 | 3.304921476 | 2.422145526 |
| 0.1064136   | 0.101026722 | 0.134628618 | 5.867604576 | 0.162401923 |
| 2.43401404  | 2.176268484 | 0           | 4.549507027 | 0           |
| 0.009014564 | 1.043288525 | 0.010880643 | 4.66186304  | 1.643062872 |
| 1.641888961 | 0.726399612 | 0           | 9.458130316 | 0           |
| 0           | 1.09894264  | 0           | 7.701533519 | 1.413944894 |
| 1.42816691  | 0           | 0           | 6.116023923 | 0           |
| 0.052594482 | 0.05017959  | 0.064844401 | 4.3358775   | 1.286188465 |
| 0           | 0           | 4.604131256 | 4.122878713 | 1.961568948 |
| 0.013083273 | 1.062713695 | 0.015823109 | 7.589721084 | 1.070683642 |
| 0.692445697 | 0           | 1.571901096 | 6.803108105 | 0.672273491 |
| 0.837857875 | 0.839933403 | 3.455965694 | 6.496896116 | 2.336109651 |
| 0.989976707 | 0.990124306 | 0           | 10.16181232 | 0.988973906 |
| 0.758793892 | 0.761637691 | 0           | 5.170395066 | 1.265818681 |
| 0.524747012 | 0           | 0           | 3.997856415 | 0.951373026 |
| 0.844891987 | 0           | 0           | 6.790267843 | 0.392805503 |
| 1.035653531 | 1.625544418 | 1.037989389 | 5.107325829 | 2.05052979  |
| 0.545760287 | 0           | 0           | 2.520389393 | 0           |
| 0.890244292 | 2.183297668 | 0.884107458 | 9.448578783 | 0           |
| 1.464163974 | 0           | 2.658875588 | 11.3916759  | 2.839555571 |
| 0           | 0           | 0.657131931 | 5.403379044 | 1.148795511 |
| 0.009247133 | 1.044400773 | 0.011162627 | 2.656030087 | 1.644557078 |
| 1.073240106 | 0.014412716 | 3.689877901 | 8.085213875 | 1.081347515 |
| 1.756849611 | 0.811192421 | 0           | 3.908353782 | 0.793840187 |

|             |             |             |             |             |
|-------------|-------------|-------------|-------------|-------------|
| 0.14281511  | 0.135155625 | 0.183801427 | 6.364839687 | 1.789854982 |
| 0           | 0.341690524 | 1.015688807 | 5.58674748  | 0           |
| 0           | 1.378869614 | 0           | 4.72630117  | 2.532103093 |
| 1.241042172 | 0.454730477 | 0           | 4.237661551 | 0.849266427 |
| 1.684291448 | 2.102220512 | 0.021481428 | 3.846686714 | 2.121828116 |
| 1.289349514 | 1.284053881 | 0.074915793 | 1.98026735  | 1.329841636 |
| 0           | 0.65075861  | 0.632705434 | 3.528526036 | 0           |
| 1.514978539 | 2.322644748 | 0           | 7.98124952  | 1.440941289 |
| 0.003697585 | 1.605576021 | 0.004451389 | 5.353995763 | 0.005122492 |
| 2.506638482 | 0.029787752 | 0.038016264 | 5.909412258 | 1.168885416 |
| 1.19826889  | 1.19484777  | 1.831935866 | 12.32346932 | 1.847519802 |
| 0.024886147 | 1.118664493 | 0.030271855 | 3.661709053 | 0.035163384 |
| 0.053573541 | 0.051108962 | 0.066082808 | 7.720095673 | 0.077763651 |
| 1.617976641 | 0.005583578 | 2.361086585 | 3.748890219 | 1.622551979 |
| 0.017075564 | 1.081705439 | 0.020691832 | 4.900186809 | 0.023952018 |
| 1.226602406 | 0.045013531 | 0.057985524 | 5.789165779 | 0.068035204 |
| 1.629058595 | 2.2006948   | 0           | 5.195905526 | 2.351898418 |
| 1.135482671 | 1.133245826 | 0.034090204 | 3.220987736 | 2.519674312 |
| 0           | 0.660092572 | 3.910358941 | 4.361369253 | 2.254794657 |
| 0.69870128  | 0.702022405 | 0           | 3.273306346 | 3.083313531 |
| 2.231882194 | 1.802204484 | 0.049469533 | 4.42061814  | 2.274034797 |
| 0.631519545 | 0.635267278 | 0           | 2.376861367 | 0.60965333  |
| 0.024609256 | 1.117358718 | 0.029930995 | 4.851721322 | 1.133233885 |
| 0.025755113 | 0.024635941 | 0.031342168 | 2.182369872 | 0.036420775 |
| 0.089394357 | 1.414184018 | 0.112184104 | 10.05367387 | 0.13423472  |
| 0.012549433 | 0.012019648 | 1.661572746 | 6.837084265 | 0.017529122 |
| 0           | 0           | 5.169850305 | 3.369933945 | 0.942108403 |
| 0           | 0.595568939 | 0           | 4.315973651 | 0           |
| 0.000735784 | 0.000705549 | 1.003827927 | 5.363951773 | 0.00101653  |
| 1.721586291 | 0.147942375 | 5.033107    | 2.628107572 | 0.250585862 |
| 0.111240949 | 0.105564398 | 0.141058205 | 1.622216236 | 1.611715929 |
| 2.27310502  | 0.771529825 | 0.757635366 | 4.578813175 | 1.973453052 |
| 1.049576308 | 2.059192783 | 1.052870565 | 3.892056121 | 3.885248859 |
| 1.329616632 | 0.065909661 | 0.085990456 | 3.33821355  | 0.101922275 |
| 0.697630549 | 1.223926325 | 0           | 4.796316627 | 0.677633429 |
| 2.65877609  | 1.651341823 | 0.014511385 | 4.625607307 | 0.016760184 |
| 1.785412221 | 1.172509764 | 2.231022415 | 4.388299751 | 2.247418334 |
| 0           | 0           | 0           | 2.59843788  | 1.513930159 |
| 0.857701229 | 0           | 0.85004416  | 3.919383014 | 0.845751044 |
| 1.577105537 | 0.679937578 | 0.662702523 | 4.487298897 | 2.076688165 |
| 1.408130049 | 0.852814981 | 0           | 4.487850401 | 2.574994077 |
| 0.174770448 | 0.164955623 | 0.228270434 | 4.341054658 | 0.284776307 |
| 0.90893073  | 0.910178848 | 0           | 5.642960335 | 0.900728049 |
| 0.056222576 | 1.883251889 | 0.069439326 | 3.613422177 | 1.306129947 |
| 1.536152172 | 0           | 0           | 5.095610147 | 1.940654723 |
| 0.623300724 | 1.129666456 | 1.767491185 | 5.81982927  | 4.986280088 |
| 0.049295208 | 0.047046515 | 1.87933333  | 3.715090517 | 0.071265758 |
| 2.245061377 | 0.04084088  | 3.609248466 | 5.000974417 | 0.061448564 |
| 2.17700825  | 0.108497246 | 0.145231522 | 4.607113649 | 1.629238959 |
| 0.062848938 | 1.916465866 | 0.077872281 | 9.568513684 | 0.092029144 |
| 0.828278094 | 0           | 0           | 5.663333872 | 1.357982411 |
| 0.4877808   | 1.308788335 | 0           | 4.13424156  | 0.900805944 |
| 0.067285902 | 0.064107963 | 0.083548401 | 0.123683842 | 1.367097493 |
| 0.120250879 | 0.114023945 | 1.618317244 | 5.555999807 | 1.662338503 |
| 1.308225345 | 1.302519059 | 0.080086574 | 5.859772107 | 0.094721897 |
| 2.34895223  | 1.291344407 | 0.076952768 | 4.832028951 | 0.090912194 |
| 1.609392923 | 1.619833398 | 0           | 7.529316526 | 2.70809741  |
| 1.979702879 | 0.070382195 | 0.092075056 | 1.405427916 | 1.403753061 |

| hsa-miR-485-3p | hsa-miR-371a-3p | hsa-miR-944 | hsa-miR-3934-5p | hsa-miR-509-3-5p |
|----------------|-----------------|-------------|-----------------|------------------|
| 6.665653085    | 0.125493415     | 0.128871013 | 1.366280039     | 1.410180165      |
| 5.128326622    | 0.007247205     | 3.497900652 | 1.61258843      | 0.006635628      |
| 4.748141642    | 0               | 2.213415426 | 1.412268208     | 0                |
| 3.943510965    | 0               | 3.106040523 | 1.833618687     | 0.860032628      |
| 1.057835072    | 0.016638181     | 0.016993343 | 0.011520274     | 0.015205326      |
| 4.186223343    | 0.035029025     | 1.732740124 | 2.135442739     | 0.031894527      |
| 2.477063319    | 0.244267734     | 4.830389522 | 0.146021555     | 1.744764645      |
| 4.425990974    | 0               | 0           | 0.580893098     | 0                |
| 3.318185079    | 0               | 0           | 0               | 0                |
| 5.030583795    | 0.730667767     | 0           | 1.276957961     | 0                |
| 4.181886009    | 0.125289881     | 2.077736255 | 1.365752476     | 0.112066752      |
| 5.741084463    | 0.105846369     | 0.108588495 | 0.068934698     | 0.095034847      |
| 3.729716373    | 0               | 3.246933851 | 0               | 0                |
| 1.883188211    | 0.07344763      | 6.709994131 | 0.048880745     | 0.066366661      |
| 4.037359343    | 0               | 2.952950297 | 1.550333322     | 0                |
| 2.705486638    | 2.97197778      | 3.573853054 | 0.05581756      | 1.283430426      |
| 4.139490657    | 0               | 2.536847131 | 0.718368454     | 0                |
| 0.795702345    | 0               | 3.573140935 | 0               | 0                |
| 10.09785152    | 0.141720419     | 1.469593444 | 0.090180006     | 0.126360081      |
| 5.612687366    | 0               | 1.950988478 | 0               | 0                |
| 3.047766403    | 0.436411306     | 3.02244378  | 0.235155899     | 0.368463113      |
| 4.773608289    | 0.124447408     | 0.127790172 | 1.995071121     | 0.111331424      |
| 10.95162365    | 0               | 2.160927422 | 0               | 0                |
| 5.137365837    | 0.216017949     | 0.222839088 | 2.23157897      | 0.189888394      |
| 9.404026868    | 0               | 1.415141137 | 0.871133792     | 0                |
| 4.731094217    | 0               | 0.872955835 | 0               | 0                |
| 3.056075395    | 0.010762607     | 0.010989124 | 3.746425935     | 0.009847389      |
| 1.636896132    | 0.199901542     | 3.417790401 | 0.122690187     | 0.176258885      |
| 2.243640805    | 0.054593249     | 1.189137073 | 1.780494174     | 1.805317568      |
| 2.9873008      | 0               | 1.321416773 | 0               | 0                |
| 2.092648312    | 0.130018017     | 4.411680657 | 1.377959262     | 1.423782893      |
| 2.483902778    | 1.728315464     | 3.342248963 | 0.023272834     | 0.030990834      |
| 1.842504316    | 3.106773752     | 1.21705846  | 0.042186165     | 0.056986786      |
| 4.13981998     | 0               | 2.486552056 | 0.689191264     | 2.815500754      |
| 3.903847649    | 0               | 1.27241187  | 0.762547862     | 0.749221692      |
| 5.067905232    | 0               | 7.68229946  | 0.748103304     | 2.601634879      |
| 0.115672629    | 0.105340892     | 0.108067193 | 0.068628319     | 1.348676084      |
| 4.343721757    | 0.017505817     | 1.061920485 | 0.012113494     | 0.015995451      |
| 3.04345678     | 0.047931554     | 1.785008369 | 1.150375987     | 0.043530282      |
| 3.132626178    | 0.025906415     | 1.091195406 | 1.083049581     | 0.023631365      |
| 2.77311564     | 1.400726297     | 2.110526654 | 0               | 0.850997515      |
| 3.037821619    | 0.007228644     | 1.025721603 | 1.023609867     | 0.006618658      |
| 2.104836326    | 1.443340271     | 0.137081063 | 1.386718988     | 0.119163941      |
| 3.633987949    | 0.1904604       | 0.196223215 | 2.937743266     | 0.168236236      |
| 3.891816785    | 3.262631225     | 3.501454224 | 1.450398518     | 1.508916023      |
| 2.681186817    | 0               | 0.914520257 | 0               | 0                |
| 3.694389296    | 0.274994221     | 8.839827141 | 0.16150806      | 0.239074542      |
| 2.823126173    | 0.113158715     | 1.380240203 | 0.073344508     | 0.101455285      |
| 4.881325755    | 3.933517564     | 3.4651999   | 0.859497657     | 0.850352702      |
| 4.415055675    | 0.217791178     | 3.200595727 | 0.132241636     | 0.19138299       |
| 4.585529559    | 0.100465        | 2.430812132 | 0.065662608     | 0.090298194      |
| 4.696125285    | 0               | 2.918868967 | 0               | 0                |
| 4.536473626    | 0               | 2.422627012 | 1.411342028     | 0.546544994      |
| 5.419144055    | 0.164447105     | 0.169202411 | 0.10315303      | 0.145982841      |
| 2.471331219    | 0.031302794     | 3.482094518 | 0.021449113     | 0.028522987      |
| 3.347049814    | 0               | 2.260927857 | 2.047178375     | 0.781131631      |

|              |             |             |             |             |
|--------------|-------------|-------------|-------------|-------------|
| 3.849080834  | 0.110305656 | 2.46906255  | 0.071628881 | 0.09895239  |
| 3.617053955  | 0           | 0.633060099 | 2.08964812  | 0.632120436 |
| 5.286380211  | 0.006801345 | 1.614367757 | 0.004742727 | 0.006227953 |
| 3.415685068  | 0.017775965 | 2.673210171 | 0.01229805  | 1.062334387 |
| 4.664395644  | 0           | 3.267817471 | 2.138235249 | 0           |
| 10.01733673  | 3.413371659 | 2.719611278 | 0.058259325 | 0.079666586 |
| 2.355112508  | 0.006777832 | 4.621975657 | 3.028893601 | 1.023949132 |
| 8.197325815  | 0           | 2.973013326 | 1.834296634 | 0.629798375 |
| 6.121203352  | 1.65603103  | 5.006689553 | 2.002927084 | 0           |
| 5.046560653  | 0.000380859 | 1.001360672 | 0.000266822 | 0.000349203 |
| 2.662757479  | 0.161479963 | 0.166124807 | 0.101479808 | 0.143430585 |
| 3.550398192  | 0           | 0.904340513 | 2.206537952 | 0           |
| 5.115004862  | 0.210021556 | 2.365545733 | 1.570338236 | 0.184826895 |
| 4.528830208  | 0           | 0           | 0           | 0           |
| 5.2839654    | 0           | 2.709698938 | 1.512025848 | 0           |
| 3.376812951  | 0.040632173 | 3.007245054 | 0.027659718 | 1.140284874 |
| 3.025116426  | 0.044027093 | 2.528873383 | 1.744788117 | 1.15165984  |
| 4.618538136  | 0.238167016 | 1.755598294 | 2.282811392 | 0.208486514 |
| 5.960580357  | 0           | 3.039761338 | 3.086442108 | 0           |
| 3.289024403  | 0           | 1.747910112 | 0.825137006 | 2.064108108 |
| 2.755036051  | 0.034733194 | 3.987280571 | 3.141271965 | 0.031627039 |
| 2.725035804  | 0.178762682 | 2.262776479 | 1.498187661 | 0.15825638  |
| 4.064653055  | 0           | 2.469009859 | 0           | 0.663403899 |
| 3.586551656  | 0.052191569 | 0.053400367 | 0.035243929 | 0.04735896  |
| 5.143838374  | 0.159313789 | 5.046680517 | 0.100254429 | 0.14156548  |
| 4.292817407  | 0           | 1.975546994 | 0           | 1.976228456 |
| 4.488079712  | 0           | 1.276250587 | 1.696924384 | 0           |
| 6.855101096  | 3.806012862 | 1.071576741 | 0.013997107 | 0.018508955 |
| 2.680736709  | 0           | 0.48161494  | 1.598494131 | 0           |
| 7.405344607  | 0           | 0.802497594 | 0.814021363 | 1.34308208  |
| 4.012040655  | 0.115495056 | 2.042434981 | 0.074744735 | 0.103502821 |
| 1.817555971  | 0           | 3.128814231 | 2.693585598 | 4.795546141 |
| 2.676223341  | 0.308480181 | 4.006497724 | 0.17780496  | 0.266532279 |
| 3.172137458  | 0.000414438 | 2.001955336 | 0.00029034  | 0.000379988 |
| 2.951523904  | 0.244600981 | 3.803147592 | 0.146192372 | 1.745643118 |
| 4.545159199  | 0.186298748 | 2.287892783 | 0.115292094 | 0.164690789 |
| 2.809829768  | 0           | 1.430096799 | 0           | 0           |
| 6.207514374  | 0.013868304 | 2.654127498 | 0.009621516 | 0.012681053 |
| 8.697835157  | 9.105754404 | 1.592188092 | 0           | 0           |
| 5.607767428  | 0           | 3.590563348 | 0           | 0           |
| 4.849356671  | 0           | 0.855667082 | 0.864881686 | 0           |
| 5.34479493   | 0.085627784 | 2.708048222 | 2.308823953 | 0.077186971 |
| 2.542195485  | 0           | 7.191432927 | 0.972371984 | 1.549146553 |
| 6.043765139  | 1.071525722 | 4.355801555 | 0.01397321  | 1.669444692 |
| 5.5533758    | 0           | 1.546171339 | 0           | 0           |
| 6.497556173  | 0           | 1.761877151 | 1.789302373 | 0           |
| 9.600357341  | 4.737853323 | 3.442718909 | 1.987286845 | 1.571682079 |
| 5.080179382  | 0           | 1.948007518 | 0.754581761 | 0           |
| 2.935533943  | 0.948222384 | 0           | 0           | 0.501146873 |
| 4.950498511  | 0           | 1.119932879 | 1.171929657 | 0           |
| 2.864870176  | 0.011214627 | 1.03981227  | 2.044920254 | 0.010260037 |
| 1.609197268  | 0.523080633 | 2.650283316 | 0           | 0.522310641 |
| 8.476006135  | 0           | 3.3990871   | 1.858612269 | 0           |
| 10.10811974  | 0           | 0           | 0           | 0           |
| 4.672579962  | 0           | 2.608555671 | 1.559232992 | 0           |
| 4.247955528  | 0.014230322 | 1.050429828 | 2.38015996  | 0.013011131 |
| 8.141788043  | 0.023335717 | 2.107515461 | 2.416057764 | 0.021297401 |
| 3.8311107329 | 0           | 2.683633553 | 1.75031881  | 0.79359619  |

|             |             |             |             |             |
|-------------|-------------|-------------|-------------|-------------|
| 3.892119218 | 0.263054145 | 5.901662327 | 1.685000689 | 0.229202638 |
| 3.362635483 | 0           | 3.141889329 | 1.733152453 | 0           |
| 4.438730004 | 0           | 2.050252524 | 0           | 0           |
| 4.16529146  | 0           | 2.574764094 | 1.50990327  | 0           |
| 4.471167329 | 0.027569432 | 1.09695799  | 0.018940929 | 0.025139955 |
| 3.042962866 | 10.78281205 | 1.336948536 | 2.948731    | 0.089527655 |
| 4.470386472 | 0           | 3.180812401 | 1.145774352 | 0           |
| 6.455298336 | 0.421646399 | 3.19038327  | 0           | 0           |
| 4.423834049 | 0.005650061 | 1.609415422 | 0.003943197 | 0.005174931 |
| 3.712007165 | 0.049320853 | 1.171363909 | 0.033371717 | 0.044779622 |
| 10.87849604 | 0.066014783 | 0.067590379 | 1.203543012 | 0.05973815  |
| 3.522962188 | 0.039074815 | 1.136535402 | 1.727720764 | 0.035549536 |
| 5.874559932 | 0.087334754 | 1.938238627 | 1.885428419 | 0.078699243 |
| 3.856044391 | 0.008926221 | 3.216572214 | 1.029104602 | 0.008170188 |
| 4.142570808 | 0.026542393 | 2.121895983 | 1.683541076 | 0.024208404 |
| 3.838628296 | 1.261016917 | 0.078082916 | 1.232760695 | 0.068837489 |
| 4.283575393 | 0.693892859 | 0.694632587 | 0           | 0           |
| 1.151054342 | 1.153798695 | 6.088662679 | 0.029956725 | 0.040093444 |
| 3.290108287 | 0           | 1.125636735 | 1.538440518 | 0           |
| 2.935114706 | 0           | 1.18190105  | 0           | 0           |
| 2.620777674 | 0.064664941 | 4.495228527 | 0.043293861 | 3.29584606  |
| 2.195126011 | 1.988097604 | 2.537057169 | 1.502380523 | 1.09510232  |
| 3.367039769 | 0.038626221 | 2.175284037 | 0.026331173 | 0.035144562 |
| 2.782016858 | 0.040484711 | 0.041398162 | 1.12793645  | 0.036821867 |
| 9.379621062 | 0.152900974 | 1.503946338 | 1.43563972  | 0.136034921 |
| 5.752090554 | 0.019393963 | 1.66788471  | 1.657682129 | 1.067932552 |
| 1.514455514 | 0           | 3.082649296 | 0           | 0           |
| 3.494518976 | 0           | 5.803539294 | 4.417238545 | 0           |
| 4.398603545 | 0.001120085 | 3.813423462 | 1.589268453 | 0.001026833 |
| 0.334805686 | 0.293936242 | 0.304405084 | 1.747761859 | 0.254647566 |
| 1.625596883 | 0.196051071 | 2.320069863 | 0.120608108 | 0.17299037  |
| 3.183410753 | 0           | 3.063809361 | 0           | 0           |
| 2.3979201   | 1.05553919  | 2.072754188 | 1.050742815 | 0.014321652 |
| 0.12669082  | 0.11515949  | 1.386576874 | 0.074543881 | 2.800952232 |
| 3.70141182  | 0           | 3.464550807 | 0           | 0           |
| 3.095718795 | 0.018539687 | 2.411494052 | 0.012819413 | 0.0169366   |
| 2.591457829 | 0.057956243 | 4.818993524 | 0.038981307 | 0.052529662 |
| 3.107131358 | 0           | 1.137762266 | 0.660376848 | 0           |
| 4.552581489 | 0           | 1.393832009 | 0           | 0           |
| 3.418687578 | 0           | 2.062368814 | 0.671355835 | 0           |
| 2.753176197 | 0           | 3.650129751 | 0           | 0           |
| 2.761526093 | 0.336957115 | 2.027812633 | 0.191216938 | 0.28962289  |
| 3.54379013  | 0           | 2.181887599 | 0           | 0           |
| 3.010856519 | 0.091975219 | 1.312399985 | 0.060453529 | 0.082805317 |
| 4.681150954 | 0           | 1.528689345 | 0.957382482 | 0.954198921 |
| 4.501444314 | 0           | 1.972619165 | 2.893759993 | 10.27534154 |
| 3.715388835 | 0.079907538 | 1.273119309 | 1.243166272 | 0.072111798 |
| 4.156742639 | 0.068731599 | 1.23631274  | 1.826827266 | 0.06216322  |
| 3.160021823 | 0.202425937 | 1.65221884  | 0.124050104 | 0.178399183 |
| 9.058562736 | 3.805040102 | 1.350198863 | 0.067647376 | 0.093168559 |
| 4.153236302 | 0           | 0.813958935 | 0.825032352 | 0           |
| 3.204442707 | 0           | 3.881540362 | 1.573484324 | 0.900113714 |
| 0.122811691 | 0.111706887 | 3.843983939 | 1.330111203 | 1.368269    |
| 2.381345651 | 0.214593979 | 0.221354364 | 0.130549168 | 0.188687461 |
| 5.894312214 | 1.359867453 | 1.360121983 | 1.31710589  | 0.095900896 |
| 2.779740231 | 0.10243723  | 1.994632672 | 1.305285425 | 0.092035293 |
| 7.592899869 | 0           | 0.915582319 | 1.836453506 | 0.476196816 |
| 3.142473645 | 0.123810479 | 6.260776891 | 0.079694538 | 0.11077534  |

| hsa-miR-3922-3p | hsa-miR-7-5p | hsa-miR-496 | hsa-miR-520g-5p | hsa-miR-409-5p |
|-----------------|--------------|-------------|-----------------|----------------|
| 1.399690946     | 1.408381928  | 3.577157269 | 0.086805017     | 6.264600539    |
| 1.614912588     | 1.025534964  | 3.03783912  | 0.005373756     | 5.398581908    |
| 2.906011299     | 1.578906978  | 4.247771814 | 0               | 7.576768214    |
| 2.612665311     | 0.860287162  | 3.683929087 | 0               | 4.897775144    |
| 0.014134509     | 3.251053976  | 0.017404466 | 0.012266061     | 1.0577286      |
| 2.149371186     | 1.121039825  | 3.990733179 | 0.025537225     | 3.641723765    |
| 0.192411857     | 0.209419824  | 3.299668867 | 0.158562873     | 4.368075004    |
| 1.937358395     | 1.394703595  | 3.874946369 | 0               | 5.472584674    |
| 0               | 2.651037192  | 0.765238025 | 0               | 3.205149534    |
| 0.733638967     | 2.913865773  | 4.193186637 | 0               | 5.892347703    |
| 0.102558079     | 1.40777229   | 2.078965464 | 0.086674107     | 4.053486948    |
| 0.087206803     | 0.093519999  | 3.67014107  | 0.074031101     | 6.664930613    |
| 0.951183279     | 0            | 2.252487417 | 0               | 4.242933712    |
| 0.061180533     | 4.507005265  | 0.077303137 | 0.052338815     | 3.953380047    |
| 1.547565844     | 0.968339096  | 0.968227302 | 0               | 3.535854003    |
| 0.070121514     | 1.914817841  | 3.40448475  | 1.262684721     | 4.003968239    |
| 2.16228453      | 1.21840969   | 1.592153897 | 1.236719093     | 4.446209325    |
| 2.295199827     | 2.288508564  | 0           | 0               | 1.719474185    |
| 0.115378239     | 0.124225912  | 5.957918175 | 0.097148556     | 9.504744189    |
| 1.953575136     | 2.534507289  | 3.942584943 | 0               | 5.225868421    |
| 2.148919643     | 0.35964217   | 0.478104379 | 0.258442755     | 3.906787882    |
| 2.813430241     | 0.109501689  | 2.525796477 | 0.086131927     | 5.657328727    |
| 0.887368429     | 2.425686591  | 8.581495797 | 0               | 10.21221885    |
| 0.1716848       | 0.186320473  | 3.203763762 | 0.142286311     | 5.980057862    |
| 0.864255611     | 2.1338371    | 6.882281697 | 0               | 9.877402942    |
| 1.931597133     | 0            | 3.239789937 | 0               | 6.258740304    |
| 1.037315481     | 1.630154462  | 2.63909751  | 0.007963126     | 3.965675663    |
| 3.051685162     | 1.621501499  | 2.336246125 | 0.132790078     | 2.798742542    |
| 0.045770021     | 1.186128052  | 2.244730191 | 0.039337219     | 4.533610698    |
| 0.790128047     | 1.32524466   | 1.322016941 | 0               | 3.561807735    |
| 2.832279524     | 1.421894669  | 1.432443777 | 0.089707624     | 4.530321023    |
| 0.028733766     | 0.030557823  | 0.035663792 | 5.003029078     | 3.172545149    |
| 1.209717973     | 2.266836774  | 2.280010324 | 4.956650377     | 3.48265361     |
| 1.865418389     | 0.674104704  | 2.647836922 | 0               | 4.479457156    |
| 2.803445124     | 1.664110881  | 1.960053244 | 0               | 3.753980985    |
| 1.261813964     | 2.20090078   | 4.016185698 | 0               | 6.493489161    |
| 1.340332941     | 0.093083868  | 0.111254638 | 0.073698746     | 2.45019472     |
| 2.076307114     | 2.891238784  | 3.090261894 | 0.012898849     | 6.206882511    |
| 1.774390854     | 0.042905176  | 2.547376022 | 0.034674238     | 1.163485366    |
| 1.68981404      | 2.440538946  | 2.446570651 | 0.01899114      | 5.390829502    |
| 0               | 0.851263181  | 2.366390202 | 0               | 4.21585517     |
| 0.006161272     | 1.025469901  | 2.357415871 | 0.005360054     | 4.432565626    |
| 1.422630133     | 0.117177219  | 2.559821253 | 2.801079978     | 3.180648443    |
| 0.1526156       | 2.263461312  | 1.616638132 | 0.127153592     | 3.116548966    |
| 2.148383773     | 5.46499861   | 0.168805271 | 0.107904484     | 4.31971633     |
| 1.891423146     | 0.915037288  | 1.480260109 | 0               | 3.672974911    |
| 0.21455152      | 1.81898531   | 3.683080563 | 0.17575741      | 5.349795174    |
| 0.093003323     | 0.099818279  | 1.379382947 | 0.078818028     | 4.00208749     |
| 1.806840801     | 1.803029553  | 3.847201068 | 3.706616778     | 5.073166347    |
| 1.651843954     | 0.187778513  | 3.490454101 | 0.143321651     | 4.545107501    |
| 2.397053869     | 1.332234751  | 2.432775664 | 0.070483099     | 4.669240751    |
| 0               | 1.271424252  | 3.826461509 | 0               | 5.864833373    |
| 1.666008999     | 0.546885367  | 3.122765132 | 0               | 5.767570292    |
| 2.608107848     | 1.522305228  | 4.331302648 | 0.111332847     | 6.715762536    |
| 1.106825673     | 0.02812664   | 1.71741861  | 0.022872099     | 3.865823465    |
| 0               | 0            | 0.782055025 | 0               | 2.827997204    |

|             |             |             |             |             |
|-------------|-------------|-------------|-------------|-------------|
| 1.35511243  | 1.362461582 | 1.370324889 | 0.076954967 | 5.761507085 |
| 2.049730417 | 1.496459553 | 2.023530835 | 0           | 5.076350279 |
| 1.613084247 | 2.030773498 | 3.621589797 | 0.005044542 | 6.342598061 |
| 1.657558712 | 1.062167533 | 1.661036148 | 0.013095738 | 3.795910126 |
| 1.638160304 | 0.529836618 | 1.61602192  | 0           | 4.600875426 |
| 0.073284243 | 2.364805213 | 7.564736454 | 6.177386761 | 9.367774245 |
| 3.032288493 | 3.203455425 | 1.024024991 | 2.028139952 | 2.842271605 |
| 3.33059172  | 3.31501711  | 7.260284389 | 0           | 8.556942427 |
| 2.802176493 | 4.002238119 | 1.95884258  | 0           | 5.241651003 |
| 2.001697462 | 1.001348514 | 3.002005707 | 0.000283608 | 5.783545531 |
| 0.130615341 | 1.5138149   | 1.52944321  | 0.109500526 | 4.200945724 |
| 0           | 2.192529359 | 2.665800043 | 0           | 6.181961526 |
| 0.167238171 | 1.649080397 | 1.674414103 | 0.138771326 | 6.24534092  |
| 2.806604799 | 0           | 2.790758772 | 0           | 5.677185757 |
| 2.234428908 | 2.905823991 | 4.28688788  | 1.920400896 | 5.414980077 |
| 1.746800695 | 0.036431732 | 2.514457526 | 0.029522421 | 3.376738895 |
| 2.185687243 | 1.763655003 | 2.199297285 | 0.031924082 | 4.137804205 |
| 2.822077138 | 2.854734997 | 2.46028594  | 0.155086677 | 4.346400041 |
| 1.764521097 | 2.54595075  | 2.317560126 | 0           | 5.577057067 |
| 0           | 1.754114446 | 2.715316913 | 0           | 3.165666999 |
| 1.118222533 | 2.152017179 | 1.731520651 | 0.025326072 | 4.995638964 |
| 1.548934951 | 2.227832475 | 0.190315062 | 0.120092748 | 3.589986986 |
| 1.548953976 | 0           | 3.142964907 | 0           | 5.913341009 |
| 3.556723432 | 0.046673276 | 2.835825721 | 0.037660347 | 4.596298596 |
| 2.592130136 | 0.13910967  | 3.710710844 | 0.108159169 | 4.745722848 |
| 1.563365725 | 0           | 3.971402563 | 0           | 4.877404079 |
| 3.093756568 | 0.752592899 | 3.185837827 | 0           | 4.487974421 |
| 1.069756063 | 2.415392387 | 4.633454223 | 0.014908851 | 6.361472159 |
| 0.926834024 | 2.714824372 | 2.789510876 | 0           | 4.808762034 |
| 0.804833029 | 0.803027155 | 5.343895733 | 0           | 8.194581028 |
| 2.44909603  | 3.296920463 | 1.386783277 | 0.080339263 | 5.214645767 |
| 3.372622417 | 2.471868035 | 0           | 0           | 3.124594126 |
| 0.238216519 | 1.902087578 | 0.333143914 | 0.193925615 | 3.804335922 |
| 2.58691346  | 1.586721908 | 2.587072491 | 0.000308606 | 3.809640479 |
| 1.719670676 | 1.740997043 | 0.262297321 | 0.158752153 | 3.828448977 |
| 2.22970264  | 2.250858303 | 2.290950149 | 0.124651454 | 5.025368934 |
| 2.82446756  | 2.409425584 | 2.144277657 | 0           | 2.977411493 |
| 2.060733556 | 2.06221236  | 3.533049675 | 2.056984906 | 5.287131484 |
| 1.223331822 | 1.600184269 | 7.297649347 | 0           | 8.950037998 |
| 0           | 2.156509448 | 5.026172883 | 0           | 6.914346356 |
| 2.387452115 | 0.856277189 | 4.290253134 | 0           | 4.970797786 |
| 2.675554708 | 1.918875272 | 3.211974735 | 0.060588129 | 4.680924248 |
| 2.283032961 | 2.544167301 | 1.548508128 | 0           | 2.280524492 |
| 0.017166552 | 0.018226037 | 5.064523965 | 0.014883343 | 7.273581918 |
| 2.678972326 | 3.07285815  | 3.836619275 | 0           | 6.228658859 |
| 2.342194421 | 0           | 3.306636723 | 0           | 6.872399365 |
| 1.98609913  | 2.792034829 | 6.322216064 | 0           | 8.559375101 |
| 0.743440462 | 0.741338089 | 3.166587584 | 0           | 4.879535977 |
| 2.655392306 | 1.298889903 | 2.00189308  | 0           | 5.222204551 |
| 2.4351914   | 1.392686067 | 4.393170836 | 0           | 5.009867639 |
| 3.513220875 | 4.226222601 | 2.052405555 | 0.008295263 | 4.231669672 |
| 2.073927502 | 2.06063848  | 0           | 0           | 2.519431606 |
| 3.001618389 | 1.440071993 | 6.73476427  | 0           | 8.166125844 |
| 0.889679999 | 4.004243765 | 9.860374756 | 0           | 9.754258407 |
| 0.652603725 | 2.280140455 | 2.752413772 | 2.319507392 | 4.778280187 |
| 1.643309512 | 0.012836606 | 0.014881851 | 0.01050643  | 3.984273913 |
| 2.100969968 | 3.92182963  | 4.031230546 | 1.076663928 | 7.470502429 |
| 1.336007303 | 1.332370651 | 3.132127296 | 0           | 3.831126705 |

|             |             |             |             |             |
|-------------|-------------|-------------|-------------|-------------|
| 0.205997374 | 2.471472621 | 3.009113937 | 0.169136928 | 5.956195554 |
| 2.378314754 | 2.465019216 | 3.072293729 | 0           | 4.094378382 |
| 1.355957    | 2.532446571 | 2.049859606 | 0           | 4.541068759 |
| 2.626776256 | 2.216132034 | 2.78051146  | 0           | 4.049333978 |
| 1.094354285 | 1.698728572 | 1.701982054 | 0.020189845 | 5.151256177 |
| 0.082225444 | 2.740051059 | 0.10511594  | 0.069904593 | 4.297666802 |
| 3.005742207 | 1.486488813 | 2.220120559 | 0           | 4.891047106 |
| 0           | 1.441437339 | 5.836085351 | 0           | 8.508751332 |
| 3.349176893 | 1.608815309 | 2.349714648 | 0.00419362  | 4.938748783 |
| 0.041424992 | 2.212299207 | 3.245109398 | 0.035649739 | 5.35119556  |
| 2.271246324 | 1.223337817 | 8.313270188 | 0.047247401 | 9.83253445  |
| 0.032935898 | 0.03504781  | 2.775403744 | 3.865668795 | 4.668723047 |
| 1.285847213 | 3.385425301 | 5.648546694 | 0.061735033 | 7.671472782 |
| 1.621781188 | 2.850646163 | 1.623453578 | 0.006611882 | 4.297329223 |
| 2.114382682 | 0.023875254 | 1.697719017 | 0.019449839 | 4.049032425 |
| 1.25151509  | 1.256121972 | 2.670746025 | 0.054229275 | 6.01186172  |
| 1.896252016 | 2.987530673 | 2.68294163  | 0           | 5.196176526 |
| 0.037118197 | 3.376903953 | 0.046282295 | 0.03198519  | 4.75873412  |
| 2.054292513 | 2.04403879  | 2.580334239 | 0           | 5.82552694  |
| 2.524021268 | 1.563741207 | 2.655972828 | 0           | 3.460801304 |
| 1.83607772  | 0.057664687 | 2.891826307 | 0.046318043 | 4.332291097 |
| 3.294182564 | 4.169090712 | 0.612467775 | 2.041454815 | 3.497833184 |
| 1.73914358  | 1.133138238 | 2.505327963 | 0.028098774 | 4.0105112   |
| 0.034107598 | 1.1393655   | 2.183871294 | 0.029417881 | 4.463314293 |
| 0.124023805 | 2.14673444  | 6.241768203 | 0.104169903 | 9.167151269 |
| 2.409065909 | 1.067748993 | 3.687717393 | 0.014273605 | 6.836913112 |
| 3.619042057 | 3.238718558 | 1.513759949 | 0           | 3.716293015 |
| 3.47918048  | 2.487241342 | 2.856188019 | 0           | 5.101738832 |
| 1.589623893 | 0.001013443 | 3.327933666 | 2.004689419 | 4.960556115 |
| 0.22799629  | 0.249378863 | 3.106833659 | 0.186105533 | 4.812867491 |
| 2.257768136 | 3.068814667 | 2.323491436 | 0.130497938 | 3.65449182  |
| 4.019108577 | 1.667210255 | 2.214146673 | 0           | 5.099041984 |
| 2.65709893  | 1.650416113 | 2.398141329 | 0.011557819 | 3.251994549 |
| 0.094584453 | 2.02212994  | 1.385721327 | 0.080121014 | 2.038400944 |
| 1.87089233  | 1.862620127 | 2.654068942 | 0           | 4.35034506  |
| 3.257192065 | 2.896065344 | 2.411830047 | 0.013652    | 5.190499851 |
| 0.048533298 | 1.197143462 | 0.060896406 | 0.041677333 | 4.550043992 |
| 1.146734938 | 3.024646124 | 1.506504527 | 0           | 4.465811017 |
| 0.847346063 | 1.39706431  | 2.93169938  | 0           | 4.788426399 |
| 1.837696346 | 1.156305544 | 3.587360695 | 0           | 5.620103976 |
| 1.391070241 | 0.838545473 | 1.781035167 | 0           | 4.194294923 |
| 1.937531561 | 1.970581484 | 0.365052381 | 0.208933475 | 4.680528981 |
| 1.466760431 | 3.554701071 | 3.842536657 | 0           | 5.006857986 |
| 0.076133214 | 3.207970818 | 1.956261907 | 0.064841671 | 2.736334466 |
| 1.530888758 | 0           | 1.938749756 | 0           | 5.135137371 |
| 1.753121123 | 1.743732274 | 1.731423924 | 0           | 4.681962597 |
| 2.654200587 | 2.66485399  | 2.686345326 | 0.056728341 | 3.560139671 |
| 3.888497306 | 3.310406291 | 2.638699857 | 0.049113487 | 5.057713465 |
| 1.611939428 | 0.175107979 | 2.344579991 | 0.134287894 | 5.381571966 |
| 1.335499357 | 3.448868882 | 7.098825206 | 7.094165968 | 9.838803615 |
| 4.250121285 | 2.896220772 | 2.71514314  | 0           | 4.936760358 |
| 1.248852556 | 2.290512783 | 2.403738842 | 0           | 5.178793495 |
| 0.091854691 | 2.010331672 | 0.118059622 | 0.077870719 | 0.123173944 |
| 2.309928937 | 0.185148821 | 3.713509895 | 0.141453545 | 3.925095533 |
| 3.248294656 | 0.094369714 | 3.071714166 | 0.0746783   | 6.950065199 |
| 0.084494722 | 0.090576667 | 1.345222283 | 0.071785909 | 4.083862786 |
| 1.267987294 | 1.976508305 | 6.514920331 | 0           | 6.872270638 |
| 2.47720338  | 1.403336435 | 1.412998209 | 0.085721692 | 3.3743706   |



| hsa-miR-147b-3p | hsa-miR-376c-5p | hsa-miR-382-3p | hsa-miR-539-5p | hsa-miR-3131 |
|-----------------|-----------------|----------------|----------------|--------------|
| 0.091852053     | 3.105093219     | 4.294901748    | 4.605652998    | 0.096855258  |
| 0.005633758     | 0.006535717     | 1.616235567    | 3.208287565    | 1.024866037  |
| 1.114609642     | 2.370453137     | 3.451952011    | 6.710178869    | 1.977541646  |
| 1.42257044      | 1.415044546     | 2.787080499    | 4.094456343    | 0.863161194  |
| 0.012869802     | 1.654356145     | 2.077321675    | 3.086086736    | 4.325413296  |
| 0.026835193     | 2.153139203     | 3.991139432    | 4.435472526    | 0.028103659  |
| 1.684453707     | 1.739467395     | 2.480288699    | 3.590073734    | 0.179729418  |
| 2.353045766     | 1.035804434     | 3.755867819    | 4.991241152    | 0            |
| 0               | 0               | 0.765618439    | 1.98426428     | 0            |
| 0               | 1.943936965     | 3.464843681    | 5.977818157    | 6.143643338  |
| 0.091712192     | 1.407513481     | 3.378486489    | 4.604788182    | 0.096706372  |
| 1.329549384     | 3.033288365     | 4.320219875    | 5.387530447    | 0.082367223  |
| 0.952346126     | 0.950614673     | 2.734305151    | 4.620753624    | 0.9517643    |
| 3.762491812     | 1.247122188     | 1.250788151    | 4.070511195    | 0.057949335  |
| 2.544433049     | 1.546893878     | 1.546085327    | 2.539312841    | 0            |
| 1.267737403     | 0.074852537     | 2.369053392    | 4.229757199    | 0.066353186  |
| 1.923936838     | 1.902774042     | 1.592425412    | 4.081352964    | 0            |
| 2.882997324     | 0               | 0              | 1.329968884    | 0            |
| 0.102915306     | 6.056259952     | 7.017127575    | 10.42417544    | 0.108645809  |
| 0.964678427     | 3.406835273     | 4.526652096    | 5.612681082    | 0            |
| 0.278492667     | 0.358428939     | 0.483747162    | 4.439341134    | 3.579052431  |
| 2.454828662     | 2.494454797     | 3.904615057    | 5.971787574    | 0.096089834  |
| 0               | 6.321915351     | 9.397657595    | 9.799556859    | 0.888595984  |
| 0.151479611     | 2.338364746     | 2.389506743    | 3.727400379    | 1.63185418   |
| 0.867140861     | 4.253777542     | 7.547718218    | 7.96401861     | 0            |
| 0               | 1.917872887     | 3.729574432    | 4.090687407    | 2.12370326   |
| 2.045414699     | 1.037812373     | 2.050309533    | 3.22665344     | 1.036819401  |
| 1.578494911     | 0.1725695       | 1.644081284    | 1.636742545    | 0.149675501  |
| 1.177388747     | 0.048694193     | 2.244769148    | 3.59799955     | 0.043426282  |
| 0.794143366     | 1.325351598     | 2.672947958    | 3.97161459     | 0            |
| 1.397016726     | 3.348977551     | 2.095933302    | 3.932051946    | 1.404656599  |
| 0.026083219     | 0.030497517     | 1.728547813    | 2.483884753    | 3.151429763  |
| 0.047525432     | 1.213257587     | 0.066579105    | 1.21334504     | 1.824646702  |
| 0.681586604     | 2.505477825     | 3.539293969    | 3.452087263    | 1.872901454  |
| 2.818938975     | 0.749626416     | 2.210670267    | 4.03964248     | 0.753843324  |
| 0.741421363     | 3.496763222     | 3.729395514    | 7.377919791    | 2.78836282   |
| 1.960138383     | 0.092874549     | 0.112018544    | 2.003058       | 1.334057613  |
| 2.073176316     | 1.657908873     | 3.678108499    | 4.904311215    | 0.014154339  |
| 1.156633081     | 1.164083814     | 2.81659764     | 3.832189592    | 0.038238171  |
| 1.685959871     | 1.691980702     | 3.837421719    | 4.785378319    | 2.109295866  |
| 0.855833198     | 0               | 2.110158345    | 2.77313233     | 0.85427895   |
| 1.613799676     | 0.006519006     | 1.025576801    | 3.360547389    | 2.840618683  |
| 2.482744521     | 0.116901425     | 2.108160786    | 3.180953064    | 0.102645392  |
| 0.13514681      | 0.164760422     | 1.616086464    | 3.117030031    | 0.143145612  |
| 0.114445759     | 0.13842392      | 1.521049441    | 4.437875229    | 0.12096227   |
| 1.487080894     | 1.482236222     | 1.885730743    | 3.864598818    | 0.916939625  |
| 0.187785103     | 0.233567897     | 2.576340247    | 3.40849861     | 0.199957724  |
| 1.350234527     | 1.370929244     | 2.482701839    | 4.248086262    | 1.356708213  |
| 0               | 0.850659118     | 3.088948578    | 5.478148406    | 1.81024463   |
| 1.622018812     | 2.343504855     | 3.727183683    | 5.059966662    | 0.161917693  |
| 1.944649307     | 1.971109849     | 1.33846845     | 3.806602591    | 2.386815447  |
| 1.283538385     | 3.607365373     | 4.034921354    | 5.649461595    | 0.749906008  |
| 0               | 2.447323424     | 3.78123291     | 4.761015976    | 0            |
| 0.118126559     | 2.182776452     | 4.451455038    | 6.241331852    | 0.124899972  |
| 0.024027245     | 0.028071435     | 2.143416026    | 3.484412338    | 0.025155438  |
| 0.787489762     | 0               | 1.313763234    | 1.316332168    | 0.785406478  |

|             |             |             |             |             |
|-------------|-------------|-------------|-------------|-------------|
| 0.081339677 | 0.097142537 | 3.086665105 | 3.51805869  | 0.085676318 |
| 1.517090646 | 1.496671763 | 2.973690489 | 4.483630903 | 1.135879395 |
| 1.023038863 | 2.03075159  | 3.495925543 | 5.711048322 | 2.029437694 |
| 0.013741634 | 0.015991337 | 1.660983453 | 1.660325032 | 0.014371037 |
| 1.00613367  | 1.867806583 | 4.013792988 | 3.415913312 | 3.253138204 |
| 0.065919647 | 3.979877657 | 8.009965941 | 9.563044129 | 0.069322036 |
| 0.005270196 | 0.006113097 | 2.355228642 | 2.842292619 | 2.838566154 |
| 0           | 3.725515052 | 7.05286982  | 8.637539495 | 0           |
| 0.755332844 | 3.077730113 | 4.16489161  | 5.093721921 | 0           |
| 2.80908582  | 2.323729354 | 2.586902721 | 5.359727452 | 1.00131433  |
| 0.116158988 | 1.513447753 | 1.528897746 | 1.522625132 | 2.141321138 |
| 2.682072252 | 1.46984155  | 2.187457928 | 4.888584289 | 0           |
| 0.147681309 | 2.320884391 | 2.36990991  | 4.386506683 | 0.156621674 |
| 0           | 2.801443538 | 3.779695677 | 4.631455921 | 0           |
| 2.49941503  | 1.505031862 | 4.478897314 | 5.591738512 | 0           |
| 1.133616711 | 1.139796604 | 0.042867492 | 3.009037171 | 3.9890261   |
| 1.144357516 | 1.151122696 | 2.798602312 | 3.393250118 | 0.03518339  |
| 1.670270054 | 0.203896709 | 3.281213741 | 3.568957232 | 0.175657098 |
| 1.772352092 | 2.328154862 | 2.722031606 | 5.122289898 | 2.916287744 |
| 2.079917453 | 0           | 2.05665878  | 3.698475225 | 1.364797054 |
| 3.32107808  | 2.479063177 | 0.036617677 | 5.61594506  | 0.027869948 |
| 1.525592168 | 0.155040309 | 1.581126367 | 2.724953194 | 2.191001187 |
| 0           | 2.488305974 | 3.750515673 | 4.416078635 | 3.493612303 |
| 2.2082514   | 1.178146773 | 4.075600044 | 3.725855064 | 0.041559316 |
| 0.114719105 | 1.507237218 | 4.987009892 | 5.711841931 | 1.48518804  |
| 0           | 0.981691723 | 4.293037501 | 3.778729487 | 0           |
| 0           | 0           | 2.42904269  | 3.678016524 | 2.816178312 |
| 0.015647448 | 2.904010643 | 4.108945656 | 6.78605348  | 1.068791441 |
| 3.079136254 | 1.982256422 | 2.890504356 | 4.320541553 | 0           |
| 0           | 2.048739263 | 6.514542889 | 7.858413972 | 0           |
| 0.084948991 | 2.022902303 | 2.043383025 | 3.871192941 | 0.089511788 |
| 0           | 0           | 1.520658549 | 1.524304307 | 0           |
| 1.826938739 | 0.260151756 | 0.336419718 | 4.043602541 | 0.221484285 |
| 5.729845148 | 0.000374351 | 3.587217212 | 3.324161208 | 0.00033767  |
| 0.169309103 | 3.212924574 | 3.302862696 | 4.511717831 | 0.179951323 |
| 3.466715581 | 0.161308006 | 2.752532794 | 5.179335063 | 2.212193297 |
| 4.220891638 | 0.874870717 | 0.875010036 | 2.977318795 | 0           |
| 2.645997281 | 2.386358521 | 3.242591991 | 4.984195221 | 0.011231438 |
| 1.23210251  | 3.24151696  | 7.283119687 | 8.990758543 | 2.38609006  |
| 0           | 2.502100887 | 4.799371948 | 6.663569615 | 0.582202154 |
| 0           | 1.410091223 | 4.622796912 | 4.620802579 | 0.859214837 |
| 1.271061937 | 1.285777213 | 2.983472701 | 3.881313174 | 0.067207627 |
| 0           | 0           | 1.960309521 | 3.12498463  | 0           |
| 1.067727624 | 2.903847899 | 4.431519589 | 7.6682359   | 0.016339389 |
| 3.221673511 | 0.672423002 | 3.157864317 | 6.649671343 | 1.870296641 |
| 1.379993062 | 2.744398743 | 3.71667993  | 5.562698553 | 0.828091536 |
| 0.989390243 | 3.306270649 | 7.449888877 | 8.215592149 | 0           |
| 0           | 1.266136925 | 3.960938153 | 4.024958947 | 0           |
| 0.967959866 | 0           | 1.569612697 | 2.724953467 | 0           |
| 1.149651392 | 1.816860988 | 5.86838597  | 5.086310942 | 0.397542353 |
| 2.634521672 | 2.05043334  | 2.05239878  | 4.647330222 | 0.009093102 |
| 0           | 0.980353763 | 0.980268336 | 0.986037399 | 0           |
| 0           | 4.144106879 | 7.958102309 | 9.16193364  | 0           |
| 2.851218352 | 4.787758824 | 8.858253324 | 9.663642045 | 3.430210181 |
| 0.657951646 | 1.522623649 | 3.318904145 | 4.908589083 | 0           |
| 0.011021318 | 1.049872672 | 3.244455617 | 3.884455088 | 1.642245088 |
| 1.077901915 | 4.202223292 | 4.64991433  | 8.792398299 | 0.018819244 |
| 0           | 2.035575334 | 2.9968294   | 3.663269402 | 0           |

|             |             |             |             |             |
|-------------|-------------|-------------|-------------|-------------|
| 0.180584552 | 0.223998459 | 4.08476724  | 5.222883816 | 2.413478199 |
| 2.897342217 | 1.977770335 | 3.6091849   | 4.245765721 | 1.010115747 |
| 1.36230673  | 1.352629514 | 3.282031629 | 2.874143993 | 1.756646003 |
| 2.406882794 | 2.216645032 | 3.635842056 | 4.201933425 | 1.473654421 |
| 2.113661394 | 1.698656598 | 2.721132229 | 3.465656386 | 0.022191857 |
| 0.073829121 | 0.087919383 | 3.042400738 | 1.981805077 | 1.949740284 |
| 2.456808291 | 2.028679048 | 3.072928077 | 3.992060912 | 0           |
| 0           | 3.157128816 | 5.384998109 | 6.353844494 | 2.509576791 |
| 1.019158611 | 2.348462655 | 3.489793388 | 4.353390327 | 0.004592652 |
| 0.037505143 | 0.044045095 | 2.822966619 | 5.392977353 | 4.387958385 |
| 1.212431904 | 5.006759812 | 8.029737493 | 11.04447373 | 1.835528777 |
| 0.029871679 | 1.744235257 | 2.77557017  | 1.747793724 | 0.031293811 |
| 0.065140902 | 3.189437053 | 4.829181809 | 6.38064669  | 3.360575814 |
| 1.030179656 | 1.03140157  | 2.853264762 | 2.365525674 | 1.030583935 |
| 0.020424095 | 0.023828844 | 1.697646059 | 3.307242788 | 2.111885488 |
| 1.243189429 | 2.318270551 | 1.89617329  | 4.637138112 | 1.247264237 |
| 0           | 1.58652756  | 4.181056588 | 4.474108546 | 0           |
| 2.177887057 | 0.039442385 | 0.046560242 | 3.547597642 | 1.756512537 |
| 0.643124137 | 2.044349459 | 1.785246492 | 5.306963915 | 1.139555695 |
| 1.200014286 | 0           | 1.852723726 | 1.187346087 | 0           |
| 0.048788025 | 2.273413669 | 0.068422637 | 3.490751344 | 0.051213537 |
| 3.869452519 | 0.609801914 | 1.094434253 | 2.811524421 | 0           |
| 0.029535623 | 1.133079508 | 3.194556491 | 4.204471201 | 0.030940647 |
| 0.030926865 | 0.03622817  | 2.18388301  | 2.513376959 | 0.032402876 |
| 0.110439249 | 4.722796112 | 7.044519187 | 9.457245159 | 0.116679415 |
| 0.014979633 | 2.411387818 | 4.806288148 | 6.518141535 | 0.01566782  |
| 0.944161978 | 1.515202044 | 1.513821106 | 1.514468124 | 0           |
| 0.577162929 | 0.569131658 | 2.604995648 | 2.125301703 | 1.710771331 |
| 0.000873569 | 1.589711311 | 2.005287213 | 4.465728141 | 0.000912318 |
| 0.199058844 | 0.24865115  | 0.319972354 | 4.200454443 | 0.212199532 |
| 0.138751958 | 0.169388508 | 1.632687339 | 2.785998995 | 2.23920987  |
| 1.992476582 | 1.279388276 | 0.753069231 | 4.225998227 | 0           |
| 1.052659201 | 0.014102112 | 2.398167668 | 3.252025555 | 0.012678899 |
| 0.084716149 | 0.101305974 | 1.385249176 | 1.380518082 | 2.000105467 |
| 1.885378998 | 0           | 3.54591084  | 3.458675079 | 0           |
| 2.077387046 | 0.016675407 | 3.266514387 | 4.561279289 | 0.014983373 |
| 0.043876639 | 2.246868308 | 1.824900416 | 3.880573035 | 1.190757408 |
| 2.80261141  | 0           | 2.043526938 | 1.510635712 | 0           |
| 3.48836102  | 1.796655722 | 3.340949681 | 3.216485937 | 0           |
| 0           | 1.530772908 | 3.420168076 | 3.584635557 | 0.660784939 |
| 5.20263345  | 2.099590957 | 1.781138409 | 3.907069558 | 2.366778094 |
| 0.224009365 | 3.118290832 | 2.031333608 | 2.761367217 | 0.23938356  |
| 0           | 3.026766943 | 3.544360308 | 5.15860144  | 0           |
| 2.349189601 | 0.081337114 | 1.311155075 | 3.439469455 | 0.071994635 |
| 1.94418791  | 2.521968018 | 3.735922929 | 3.62898985  | 1.943131882 |
| 0           | 1.08516344  | 3.403052635 | 5.06754321  | 0           |
| 0.059824115 | 1.898000254 | 3.713193033 | 2.95909329  | 0.062871534 |
| 1.839807654 | 2.289320245 | 3.335002676 | 4.156752078 | 2.871473318 |
| 1.584704376 | 1.627905742 | 1.651533908 | 3.880593626 | 1.597737991 |
| 0.076736183 | 4.456635182 | 6.469807932 | 8.957753998 | 1.329341379 |
| 1.367736133 | 0           | 3.289481378 | 4.498650353 | 2.332725833 |
| 0.472371776 | 0.901166343 | 3.126562261 | 2.405692623 | 2.466383585 |
| 0.082316052 | 0.098345391 | 1.374312782 | 2.026407332 | 0.086713593 |
| 1.61432158  | 0.184658863 | 1.68726796  | 4.2609417   | 0.159742234 |
| 0.07891314  | 1.99321408  | 4.216028806 | 6.843565537 | 0.083099328 |
| 0.075832094 | 0.090373978 | 3.054239103 | 3.484628504 | 0.079829094 |
| 0.484552576 | 2.709619705 | 7.332869534 | 7.993360896 | 2.489974845 |
| 1.379936832 | 1.403081766 | 0.131957881 | 1.407468165 | 0.095623433 |

| hsa-miR-31-5p | hsa-miR-499a-5p | hsa-miR-3660 | hsa-miR-141-5p | hsa-miR-5683 |
|---------------|-----------------|--------------|----------------|--------------|
| 3.348782311   | 0.129633416     | 0.069954954  | 2.871646289    | 3.565557059  |
| 1.025728921   | 1.616286148     | 0.004468701  | 2.033754234    | 2.357242096  |
| 1.086520543   | 1.085878992     | 0            | 3.996052705    | 0.770866425  |
| 0             | 1.411956706     | 1.436103926  | 2.124415138    | 2.124187442  |
| 0.015719412   | 1.656284273     | 0.010171992  | 2.076786412    | 3.787677708  |
| 1.122140124   | 1.122621111     | 0.021066147  | 2.15888387     | 1.122766471  |
| 0.224263096   | 2.941303457     | 0.124585464  | 3.304978583    | 2.931158943  |
| 2.745239127   | 1.032593443     | 0            | 3.409153565    | 2.116375707  |
| 0             | 1.677698067     | 0            | 3.612692618    | 0.763635284  |
| 0             | 2.894640212     | 0            | 1.254317419    | 0.730741192  |
| 1.413521743   | 1.418448845     | 0.06985282   | 5.827206203    | 2.862870823  |
| 1.3533493     | 2.452337412     | 0.059943764  | 3.970575409    | 0.106277837  |
| 0             | 0.950269882     | 0            | 1.524893797    | 3.247426668  |
| 0.068888287   | 1.885419605     | 0.042728165  | 4.373824811    | 1.251926676  |
| 2.278597644   | 1.546007064     | 0            | 1.546496313    | 1.95777611   |
| 0.079141717   | 5.813295481     | 0.048703052  | 0.092717829    | 2.701060454  |
| 3.231271676   | 3.964312864     | 0            | 3.213592973    | 2.353329982  |
| 1.328220578   | 0.792064519     | 0.810683087  | 2.278366319    | 2.494719254  |
| 0.131780587   | 0.146541476     | 0.077995005  | 4.250242406    | 1.469074623  |
| 0             | 0               | 0            | 2.753369601    | 3.751251927  |
| 0.391513915   | 0.459544255     | 0.196687788  | 4.198180578    | 0.439323299  |
| 1.410941915   | 0.12854466      | 0.06942972   | 1.408590786    | 0.124972947  |
| 0             | 1.444219346     | 0            | 2.161506837    | 0            |
| 0.199017903   | 2.385916426     | 0.11242074   | 2.384685782    | 3.186446666  |
| 0.862130232   | 1.814490387     | 0            | 0.86502546     | 3.247516379  |
| 0.444517671   | 1.203398621     | 0            | 7.228679409    | 0.446329766  |
| 0.010176006   | 0.011039882     | 0.006615065  | 10.68526913    | 1.038259573  |
| 0.184537365   | 3.141196637     | 0.105264186  | 2.33173229     | 0.200864453  |
| 0.051327696   | 0.056149983     | 0.032275293  | 1.809381504    | 0.054793709  |
| 1.322954192   | 0.787909078     | 0            | 2.019680682    | 3.660560338  |
| 1.427955123   | 0.134344542     | 0.072217081  | 2.545177503    | 2.540724926  |
| 0.03207866    | 0.034956096     | 0.020483277  | 3.636719916    | 1.119332868  |
| 0.059108306   | 1.21698494      | 0.036941606  | 2.884215406    | 3.107210635  |
| 0             | 1.175952168     | 0            | 3.048524493    | 6.118409692  |
| 0.748609839   | 1.272495266     | 0            | 3.495255165    | 0.748758452  |
| 0             | 0               | 0            | 1.258266044    | 0            |
| 0.098402572   | 3.062556279     | 0.059682059  | 0.116063264    | 2.003898633  |
| 0.016537285   | 0.017964218     | 0.010694042  | 1.6590787      | 0.017564965  |
| 1.165767626   | 2.815290973     | 0.028501107  | 2.546727114    | 3.825468069  |
| 0.024446629   | 1.091151991     | 0.015706792  | 2.44610979     | 0.025995667  |
| 0             | 2.36688161      | 0            | 2.111415346    | 2.111126809  |
| 0.00683778    | 1.616206437     | 0.004457332  | 0.007813183    | 2.357152412  |
| 0.124205737   | 1.443899002     | 0.0739151    | 2.103938226    | 3.770629852  |
| 0.176027889   | 2.302510233     | 0.100995237  | 2.765574347    | 1.615679431  |
| 7.339127662   | 7.920408255     | 3.501576392  | 3.891774255    | 1.52149926   |
| 0             | 1.885729163     | 0            | 2.681296725    | 0.914387806  |
| 0.251525749   | 6.497004826     | 0.137301491  | 1.849734297    | 1.855949815  |
| 0.105601087   | 2.480630584     | 0.063706148  | 3.098801282    | 0.113626514  |
| 0             | 2.772972086     | 0            | 1.799409326    | 3.851142767  |
| 0.200607657   | 1.697282873     | 0.11319832   | 2.860244739    | 3.192351103  |
| 0.09390576    | 0.103620292     | 0.057146706  | 0.110584625    | 3.038391008  |
| 0.7446325     | 1.954281308     | 0            | 3.050523292    | 2.920891468  |
| 1.009902021   | 0               | 0            | 3.83567406     | 4.062138436  |
| 0.152478903   | 0.170278562     | 0.088926603  | 2.672716874    | 3.284097655  |
| 0.029518428   | 0.032149578     | 0.0188875    | 2.471160151    | 1.109943312  |
| 0             | 1.701559707     | 0            | 2.009712913    | 2.008773188  |

|             |             |             |             |             |
|-------------|-------------|-------------|-------------|-------------|
| 0.10297568  | 3.684391042 | 0.062243383 | 3.08708678  | 2.466523536 |
| 1.491829635 | 1.122126445 | 0           | 12.00502005 | 2.234428014 |
| 0.006433941 | 1.614370706 | 0.004195491 | 2.619259087 | 0.006823749 |
| 0.016791902 | 2.407959094 | 0.010856422 | 3.553844006 | 5.139383524 |
| 0.529101239 | 0           | 0           | 7.833095562 | 3.187100884 |
| 0.082780174 | 5.344327749 | 0.050801176 | 2.995429265 | 3.741509381 |
| 2.618141751 | 1.024110819 | 1.021201114 | 2.842267161 | 2.354973012 |
| 0.62923605  | 0           | 3.679123089 | 3.280751266 | 0.629931245 |
| 2.432127201 | 0.74864462  | 0           | 2.609887869 | 6.821172185 |
| 0.000360585 | 0.000390423 | 0.000236328 | 2.809331533 | 2.586883704 |
| 0.149783207 | 1.530130344 | 0.087520465 | 2.202030091 | 0.162208986 |
| 0           | 0           | 0           | 3.024396042 | 1.872251125 |
| 2.794103729 | 0.218078922 | 0.109776949 | 2.36507777  | 1.672768543 |
| 0.861817552 | 1.414773609 | 0           | 2.958071555 | 1.814450072 |
| 0.933346855 | 0           | 0           | 4.647529959 | 3.221702142 |
| 0.038270109 | 1.141794095 | 0.02431546  | 3.008904608 | 3.52581217  |
| 0.041449619 | 1.153354426 | 0.02626879  | 2.52919737  | 3.021673382 |
| 0.21882593  | 1.755972853 | 0.121998027 | 3.284156567 | 2.449366018 |
| 0.818118869 | 0.818527051 | 0.835410588 | 3.296331572 | 2.891685305 |
| 0           | 3.609932307 | 0           | 2.058296704 | 2.717929712 |
| 0.032738843 | 2.158335041 | 2.938597546 | 3.766829793 | 2.157657062 |
| 0.165457044 | 1.582247693 | 0.095624861 | 2.724167223 | 3.058921595 |
| 1.163714801 | 1.829322309 | 0           | 3.518760886 | 2.286961158 |
| 1.798423391 | 1.180984566 | 0.030919599 | 1.177557609 | 3.426529481 |
| 0.14781395  | 0.164911245 | 0.086489976 | 3.281460325 | 2.989518448 |
| 0           | 1.975535318 | 0           | 1.56272449  | 1.975610308 |
| 1.664567043 | 1.660915626 | 0           | 6.442978715 | 2.217304117 |
| 1.071345209 | 0.020802145 | 0.012350553 | 3.275503595 | 2.093371286 |
| 0.918917277 | 1.531400423 | 0           | 4.554542774 | 2.438584471 |
| 0.802140589 | 1.731709864 | 0           | 0.806472751 | 2.040653438 |
| 1.38337584  | 0.119232129 | 0.064899078 | 2.489620762 | 2.486285289 |
| 3.825960763 | 1.814384888 | 0           | 8.56543256  | 4.059876745 |
| 0.281007979 | 0.322264807 | 0.150593214 | 2.674599885 | 0.310229194 |
| 1.58674401  | 2.001956337 | 0.000257156 | 5.046753062 | 3.002155318 |
| 0.224559865 | 2.476509664 | 0.124726187 | 2.95051736  | 4.166598188 |
| 0.172270632 | 1.604740612 | 1.485675506 | 3.101368437 | 3.085273203 |
| 1.43133927  | 0.874315873 | 0           | 3.127466658 | 0.874022128 |
| 0.013107173 | 0.014228291 | 0.008499892 | 3.0719463   | 1.049208982 |
| 2.860509022 | 0           | 0           | 2.846661258 | 0.703644119 |
| 0.57624476  | 1.692382051 | 0           | 11.14442182 | 3.09273056  |
| 1.808150449 | 0.855763763 | 0           | 3.676025677 | 1.40697017  |
| 2.966084227 | 1.291725868 | 0.049307567 | 2.709818857 | 2.977257807 |
| 0           | 1.960327005 | 0           | 3.276577451 | 0           |
| 1.071223242 | 0.020766066 | 0.012329548 | 1.070036973 | 1.671276881 |
| 0           | 0.672831817 | 0           | 2.791556649 | 0.671871713 |
| 1.368797703 | 1.367369299 | 0           | 4.104076598 | 1.367354574 |
| 1.57156972  | 0.988891942 | 0           | 2.306582283 | 2.569233295 |
| 0           | 1.644982117 | 0.762712552 | 3.383300014 | 6.402330705 |
| 0.948869821 | 0.94945442  | 7.125724434 | 0.959057251 | 2.481935912 |
| 0           | 0.801992615 | 0           | 3.191714413 | 1.604688265 |
| 0.010602771 | 2.86456212  | 0.006890055 | 3.519476034 | 0.011251961 |
| 0           | 0.524747794 | 0           | 2.044294911 | 3.413665621 |
| 1.84125144  | 1.838894587 | 0           | 2.98657266  | 3.139391265 |
| 0           | 0           | 0           | 3.285188422 | 1.849937755 |
| 1.146160473 | 1.514066457 | 0           | 2.884935406 | 2.264380298 |
| 0.013448695 | 0.01460003  | 0.008718909 | 3.397276296 | 2.065972954 |
| 0.022028078 | 0.023955311 | 0.014180817 | 3.119742749 | 2.923782002 |
| 2.50271951  | 2.02635575  | 0           | 0           | 0.793023547 |

|             |             |             |             |             |
|-------------|-------------|-------------|-------------|-------------|
| 0.240955743 | 0.274039467 | 0.132421433 | 2.534902532 | 3.850696974 |
| 0.314710858 | 1.240242925 | 0           | 4.78973546  | 1.805243666 |
| 0.809152715 | 1.741456906 | 0           | 2.874328489 | 1.741889562 |
| 1.675207825 | 0.848755299 | 0           | 3.198079052 | 1.174082324 |
| 0.026010369 | 4.051733626 | 0.016690249 | 2.125919029 | 3.600803502 |
| 1.333702644 | 2.42787162  | 0.056689957 | 2.767644486 | 0.099991699 |
| 1.77605717  | 1.113296281 | 0           | 2.403745249 | 1.770645456 |
| 0.837875945 | 2.559900561 | 0           | 0.850907493 | 3.882804789 |
| 1.609122982 | 0.005793812 | 0.003488987 | 3.489893397 | 4.352422132 |
| 1.170423419 | 0.050710889 | 0.02929179  | 2.552933977 | 3.413245783 |
| 0.061975542 | 0.067944663 | 0.038647079 | 3.323496905 | 0.066263137 |
| 1.135896429 | 0.040150916 | 0.02341553  | 2.176578564 | 3.518376749 |
| 0.081768802 | 1.938433281 | 0.050219113 | 10.34315808 | 0.08767801  |
| 0.008441713 | 4.440895186 | 0.005495558 | 3.507359592 | 4.955157265 |
| 0.02504472  | 0.027252469 | 0.016083233 | 2.941040577 | 2.448453282 |
| 1.890038005 | 1.260959288 | 0.044239517 | 1.893290151 | 2.666747392 |
| 1.882828863 | 1.202288227 | 2.421615371 | 3.196944994 | 5.693988498 |
| 0.041530649 | 1.769712117 | 0.026318443 | 2.798688911 | 8.432123645 |
| 1.791193754 | 1.125815356 | 0           | 2.581492686 | 0.635060467 |
| 0           | 0           | 0           | 2.935427665 | 2.660097844 |
| 0.060718751 | 5.884761398 | 0.037900449 | 1.218570403 | 1.850545769 |
| 5.882322426 | 1.092513052 | 0           | 6.704935123 | 1.454706682 |
| 0.036390137 | 1.134943498 | 0.023155852 | 4.375457494 | 2.503629473 |
| 0.038131941 | 1.755023542 | 1.122000417 | 2.182715119 | 0.040628854 |
| 0.141977883 | 1.503975187 | 0.08341963  | 4.523320874 | 1.503281457 |
| 1.068307572 | 1.068490568 | 0.011827311 | 1.66694453  | 2.415121964 |
| 1.514363513 | 0.941770258 | 0           | 3.60980077  | 2.722598551 |
| 2.315348659 | 1.039202652 | 2.019167618 | 1.922180174 | 0           |
| 1.00399263  | 1.58983027  | 0.000694554 | 2.00524876  | 2.813101272 |
| 0.268232055 | 0.306795221 | 0.144889884 | 0.336417299 | 3.083832196 |
| 0.181069249 | 2.320959182 | 0.103530091 | 3.418706588 | 2.315992493 |
| 1.663433194 | 0.751647678 | 0           | 4.486514644 | 1.660196778 |
| 0.014804826 | 1.055450888 | 0.009587379 | 1.651399898 | 2.397537918 |
| 1.382337117 | 0.118883262 | 0.06472801  | 3.106984938 | 1.386341287 |
| 0.676750618 | 3.274945779 | 0           | 3.054944039 | 3.376323905 |
| 1.065334975 | 1.664304128 | 0.01131505  | 3.095658728 | 2.085563662 |
| 0.054466102 | 2.258413325 | 0.034164292 | 4.47144532  | 1.824314087 |
| 1.138878882 | 2.043891853 | 0           | 2.743013076 | 0           |
| 2.363631603 | 1.79104238  | 0           | 6.062478158 | 1.393873838 |
| 0.654914828 | 0           | 0           | 4.754640464 | 3.944049467 |
| 0           | 1.384752806 | 0           | 2.093038815 | 2.566370341 |
| 0.305895167 | 0.35263471  | 0.161465436 | 2.019912498 | 0.338942857 |
| 2.184603149 | 2.181796455 | 0           | 2.440741268 | 2.182333153 |
| 0.08606282  | 1.312331353 | 0.052684359 | 1.306657642 | 1.954541181 |
| 0           | 0           | 0           | 3.513912173 | 3.515352139 |
| 3.152627905 | 1.731216207 | 0           | 3.557685506 | 3.492822285 |
| 0.074885587 | 1.273045493 | 0.046234151 | 2.685746408 | 2.682089243 |
| 5.37337122  | 0.070752663 | 0.040144681 | 2.63804068  | 1.866311247 |
| 0.186809306 | 0.210093754 | 0.106395929 | 2.807367978 | 3.418226702 |
| 1.346701974 | 0.107003743 | 0.058843879 | 4.207157668 | 1.350057829 |
| 2.890745958 | 0           | 0           | 9.486117629 | 1.354558893 |
| 3.154633722 | 3.613120335 | 0           | 4.250286452 | 2.656070199 |
| 0.104265338 | 2.475038849 | 0.062962622 | 3.092846771 | 1.375429286 |
| 0.197740772 | 1.687991316 | 0.111794922 | 4.403700298 | 0.215652453 |
| 0.099776205 | 0.110229739 | 0.060453205 | 2.455940231 | 2.791097413 |
| 1.342660239 | 1.346017522 | 0.058174612 | 4.411379048 | 3.472614048 |
| 0           | 2.429592603 | 0           | 0.488350699 | 5.81087771  |
| 0.115386327 | 0.127881769 | 0.069109476 | 4.175754789 | 0.124332706 |

| hsa-miR-129-5p | hsa-miR-889-3p | hsa-miR-204-5p | hsa-miR-653-3p | hsa-miR-766-5p |
|----------------|----------------|----------------|----------------|----------------|
| 3.738746286    | 7.471907629    | 6.047466411    | 0.099816253    | 1.355287371    |
| 0.007257217    | 5.595756303    | 5.94820046     | 2.031691133    | 0.004724462    |
| 3.466287343    | 8.470408551    | 5.475200561    | 0.374817361    | 0.815327054    |
| 1.811403863    | 5.673002251    | 5.381554438    | 0.862389383    | 1.432826999    |
| 5.789611479    | 4.676849922    | 5.378426381    | 0.013801395    | 2.651327453    |
| 2.487256066    | 6.763183183    | 6.050431511    | 2.474243373    | 1.108493813    |
| 2.467441201    | 5.891874269    | 8.685767862    | 0.186103118    | 0.13378795     |
| 7.044411781    | 6.940088896    | 3.926830242    | 1.043428065    | 1.748542228    |
| 1.291304967    | 4.35882188     | 5.26998946     | 0              | 2.03287604     |
| 1.249287333    | 8.216898047    | 7.680473529    | 3.302897189    | 0              |
| 2.075574009    | 4.509979533    | 7.775866404    | 1.395368484    | 0.074497764    |
| 1.356772546    | 6.581461374    | 7.493485611    | 1.338817202    | 1.305328718    |
| 1.934010243    | 6.276171703    | 10.38050943    | 0              | 0.954927481    |
| 2.925467128    | 5.023435046    | 4.461942853    | 2.893638287    | 0.045407669    |
| 0              | 4.806917265    | 8.300850225    | 1.547866885    | 1.551283311    |
| 2.972211676    | 6.109830799    | 9.407631184    | 0.068259958    | 0.051798206    |
| 1.214094984    | 5.730955822    | 9.415943334    | 2.884593009    | 0              |
| 1.717387266    | 1.331785331    | 4.651408052    | 5.528630485    | 2.547757662    |
| 0.141979044    | 11.00334262    | 6.57584695     | 0.112043787    | 0.083268702    |
| 1.539915599    | 7.288266861    | 7.772355166    | 0              | 0              |
| 0.43762857     | 5.953354808    | 6.170403972    | 0.311806547    | 1.966457461    |
| 2.072579777    | 6.501624029    | 2.52113482     | 2.03511617     | 1.352673631    |
| 0              | 12.25750157    | 7.056947835    | 0              | 0              |
| 6.090351728    | 5.888346183    | 6.822705346    | 0.166232728    | 0.120544266    |
| 1.415210807    | 11.57158689    | 5.498884885    | 0              | 1.435706538    |
| 0.871832844    | 7.212622971    | 5.510101587    | 1.22186215     | 0.917819785    |
| 2.374131298    | 5.453047835    | 4.644853033    | 0.008948526    | 0.006995729    |
| 1.643130994    | 4.348113372    | 9.339527928    | 1.59854649     | 0.112770247    |
| 0.054677205    | 5.290022571    | 7.687282406    | 0.044613833    | 1.774386478    |
| 2.018916193    | 5.808423618    | 7.127851436    | 1.725113484    | 1.75001039     |
| 2.092313481    | 5.091310401    | 8.947043781    | 2.05273815     | 1.36653526     |
| 2.482715552    | 3.636335562    | 6.943103259    | 0.028034043    | 2.94014296     |
| 1.843722311    | 2.883049834    | 8.273657602    | 0.051265158    | 1.189412741    |
| 4.450814228    | 6.039051437    | 6.434285337    | 1.869004203    | 0.694328703    |
| 1.657125416    | 5.568889852    | 6.896293787    | 0.752666713    | 1.305373716    |
| 0              | 8.004037645    | 2.899525825    | 1.263762074    | 1.287688942    |
| 1.355163073    | 2.789015907    | 9.524370776    | 1.337325537    | 0.063566558    |
| 0.017530593    | 6.438568294    | 4.681527522    | 0.01451609     | 1.055230944    |
| 3.698747188    | 6.259460155    | 5.163138436    | 3.383027201    | 0.030230897    |
| 0.025943801    | 5.698163909    | 6.294062882    | 1.08818054     | 0.016631268    |
| 3.093164088    | 4.84064569     | 7.248108765    | 0              | 1.422676908    |
| 1.025752395    | 4.287988312    | 6.835849146    | 1.024976253    | 1.023058514    |
| 0.133675166    | 4.333497551    | 6.464897359    | 0.105818941    | 0.078871534    |
| 0.190838467    | 5.12150614     | 5.041912094    | 1.57396628     | 0.108139154    |
| 2.98740739     | 4.318939216    | 9.366482512    | 0.124834109    | 0.092226842    |
| 1.886050128    | 5.145896304    | 5.444909836    | 0.916434511    | 0.922198224    |
| 0.27561628     | 6.485554825    | 12.09885271    | 0.207283075    | 0.147670669    |
| 1.379964628    | 6.427135325    | 4.725110516    | 0.090423097    | 2.379618565    |
| 1.39990608     | 7.495184443    | 7.896525384    | 1.808474253    | 1.421950927    |
| 0.218243025    | 6.974566869    | 7.227434272    | 0.167491474    | 0.121389712    |
| 3.637302279    | 5.678518757    | 6.034128356    | 1.322879673    | 2.670922209    |
| 3.178995796    | 7.736995143    | 6.89784449     | 0.74871808     | 0.763033515    |
| 2.569250763    | 6.9820631      | 6.343755062    | 1.380147832    | 0.569984803    |
| 1.538096535    | 7.199142727    | 6.06913963     | 1.504602605    | 0.095072014    |
| 1.10994422     | 5.258737132    | 8.919279136    | 0.025815307    | 0.020007828    |
| 2.477663656    | 4.878309002    | 6.432071242    | 1.322219278    | 1.342752019    |

|             |             |             |             |             |
|-------------|-------------|-------------|-------------|-------------|
| 2.466212812 | 5.681799493 | 8.043937591 | 0.088238125 | 0.066316755 |
| 2.234634589 | 6.110234927 | 4.442542195 | 0           | 1.545525325 |
| 1.61432551  | 8.12128702  | 5.653393086 | 1.023507977 | 2.026565018 |
| 2.082070565 | 4.345111916 | 5.308586796 | 3.990639671 | 0.011487818 |
| 2.393455552 | 6.585551865 | 4.63307144  | 0.533439937 | 1.0317147   |
| 1.941127631 | 12.14869413 | 7.998847239 | 0.071326555 | 1.878784425 |
| 1.024152891 | 4.681824508 | 3.944041097 | 4.733068144 | 1.610080203 |
| 2.230700787 | 11.58775491 | 4.869069381 | 3.019533931 | 1.542322504 |
| 1.271312299 | 6.662318998 | 6.773530328 | 1.281477264 | 0.766056675 |
| 0.000381376 | 5.428445404 | 8.579641873 | 0.000317983 | 1.001223904 |
| 0.161785134 | 5.082280741 | 5.722828176 | 0.126738564 | 1.442240514 |
| 0           | 5.864552035 | 5.864551731 | 0.906427388 | 0.912813904 |
| 0.210451932 | 4.745005633 | 7.034408747 | 0.161964547 | 2.628479182 |
| 0           | 6.073033196 | 5.769808412 | 0.864618356 | 2.158329454 |
| 1.91135137  | 7.01937182  | 5.845025869 | 0           | 0           |
| 0.040692787 | 5.429605134 | 5.542396889 | 0.033386448 | 0.025776674 |
| 0.044093265 | 6.121889912 | 6.715905078 | 1.147731297 | 1.135093796 |
| 0.238677043 | 5.581348392 | 5.375833978 | 0.181844754 | 0.130967949 |
| 0.818042575 | 6.050404512 | 7.214747321 | 0           | 0           |
| 2.057796757 | 6.060153234 | 6.39870029  | 0           | 1.381043452 |
| 3.344194103 | 5.775373722 | 5.095569534 | 0.028605648 | 1.107610798 |
| 0.179110663 | 3.967357499 | 6.93384581  | 0.139420351 | 0.102319817 |
| 1.162199042 | 6.785745956 | 4.995258359 | 0           | 0.684330883 |
| 3.426292361 | 5.601204519 | 5.488327664 | 2.810539935 | 0.032806829 |
| 1.522610636 | 7.564180209 | 7.577225126 | 0.125137895 | 0.092438371 |
| 1.562471495 | 6.73813882  | 4.87740122  | 0           | 1.565535311 |
| 2.431893458 | 6.157444897 | 5.33042151  | 1.286265963 | 1.704910189 |
| 1.071647537 | 8.87946039  | 7.313977761 | 2.087123889 | 1.063757963 |
| 2.296991908 | 6.309335444 | 6.016202648 | 1.27621305  | 0           |
| 1.732203249 | 10.832835   | 6.984791383 | 0           | 1.768442509 |
| 7.365348017 | 4.562741325 | 6.828877294 | 0.092208891 | 0.069170158 |
| 0.653713713 | 3.126029793 | 4.257943044 | 1.161294985 | 0.675012444 |
| 2.657790475 | 4.586937    | 9.344566144 | 0.229872173 | 0.162223349 |
| 1.001482535 | 5.702819856 | 5.00235789  | 2.32381941  | 0.000271717 |
| 0.245129944 | 5.069671996 | 6.41383     | 0.186335215 | 0.133941369 |
| 1.603220583 | 6.396533048 | 5.620303502 | 2.221165782 | 0.106079263 |
| 0           | 3.502338175 | 6.419406005 | 2.826463816 | 0.884912886 |
| 0.013887765 | 6.75115168  | 5.121938659 | 0.011516471 | 0.008991339 |
| 1.592595438 | 10.86091955 | 9.027259278 | 2.381736189 | 0           |
| 1.406085317 | 9.188084169 | 5.299844959 | 0           | 0           |
| 1.406987437 | 7.232800877 | 4.620811814 | 0.858425263 | 0           |
| 1.930616527 | 7.340557384 | 6.250564998 | 2.339844208 | 0.052445324 |
| 1.548505457 | 5.199783575 | 7.558411285 | 0           | 0           |
| 0.020261615 | 8.718007599 | 6.97195842  | 0.016759176 | 1.063649887 |
| 2.485707678 | 8.371179475 | 7.132421244 | 2.331277082 | 1.90728853  |
| 0.823763481 | 7.032464805 | 4.35395413  | 0           | 1.79515964  |
| 1.985341423 | 10.45759166 | 7.632947308 | 0           | 1.573291135 |
| 1.948901502 | 6.251824759 | 4.843236002 | 0.744483814 | 0           |
| 1.291014503 | 5.318979646 | 7.51644481  | 0           | 0.524996343 |
| 1.96959503  | 8.227435693 | 5.226422454 | 0.809380172 | 0           |
| 1.039857439 | 5.870879667 | 5.017027982 | 1.038624115 | 0.007286818 |
| 2.379902845 | 4.04341845  | 11.19818473 | 2.26172187  | 0           |
| 0.879851028 | 10.97750454 | 6.354755734 | 0           | 0           |
| 5.909615761 | 12.68870653 | 3.821685675 | 3.303014457 | 0           |
| 1.514367864 | 6.661108342 | 5.381054394 | 0.653803442 | 1.569880746 |
| 2.390675776 | 5.861621848 | 6.23024942  | 2.873000723 | 1.045053758 |
| 2.107116837 | 8.838749263 | 6.397317545 | 0.019305603 | 1.073170396 |
| 2.027313365 | 6.057449652 | 6.090918326 | 1.73279106  | 1.757107585 |



|             |             |             |             |             |
|-------------|-------------|-------------|-------------|-------------|
| 2.524459472 | 6.108223629 | 9.637237366 | 0.19910515  | 0.142338229 |
| 0.690696512 | 6.276255285 | 7.088107167 | 0.697744361 | 1.325027197 |
| 0.809094613 | 5.655251295 | 5.072509123 | 1.754468164 | 0           |
| 2.037990917 | 6.359275973 | 6.112118303 | 2.240226424 | 0.892935221 |
| 3.462432874 | 6.083736676 | 7.948627676 | 2.11739999  | 1.684176886 |
| 0.099758578 | 4.58163356  | 5.863281149 | 1.954172461 | 0.060356073 |
| 1.478324599 | 6.727341429 | 5.837423107 | 1.497080015 | 2.093189715 |
| 1.656134209 | 9.318411596 | 8.303371696 | 1.182153151 | 0.443951709 |
| 1.02014772  | 6.182084831 | 4.78665885  | 0.004707332 | 2.022108892 |
| 1.171448503 | 6.642200379 | 4.652809961 | 0.040388137 | 0.031072871 |
| 2.623452683 | 11.96917438 | 4.66343986  | 3.989036827 | 0.041048367 |
| 1.136627308 | 5.767580484 | 5.2560016   | 1.739380068 | 1.120515456 |
| 0.087478494 | 9.272128379 | 6.004805658 | 0.070474752 | 0.053421301 |
| 8.695787583 | 5.408022455 | 9.301570663 | 2.362168586 | 1.028421697 |
| 0.026580752 | 4.788793875 | 8.591740892 | 0.02193062  | 1.08294382  |
| 0.076346514 | 6.443731052 | 6.508041901 | 1.249485073 | 1.842144767 |
| 3.498417243 | 6.836780033 | 5.248995619 | 0           | 1.938328147 |
| 2.796116067 | 4.820439608 | 4.9911594   | 1.758327308 | 0.027907562 |
| 4.506221019 | 6.254089872 | 2.980610595 | 0           | 0           |
| 1.555900652 | 5.458549802 | 6.290635744 | 1.192972331 | 1.220433757 |
| 2.617695966 | 5.626281099 | 12.32758388 | 1.213532508 | 0.040251339 |
| 0.609574868 | 4.664466576 | 4.889390973 | 1.473772987 | 0.63174267  |
| 1.135093582 | 5.91140645  | 6.142123639 | 0.031763211 | 0.024543537 |
| 1.754592718 | 4.463185907 | 5.67949754  | 0.033267207 | 2.740241549 |
| 2.623565159 | 11.17073984 | 6.021775703 | 0.120384468 | 0.089121978 |
| 3.098334741 | 7.289399185 | 6.039518832 | 0.016069707 | 0.012516831 |
| 4.716835119 | 4.905951941 | 3.815630564 | 0           | 2.254670715 |
| 1.919691284 | 5.444702471 | 5.28326622  | 2.507749705 | 0           |
| 1.58982359  | 6.050840233 | 6.17637724  | 1.589584932 | 1.589147487 |
| 0.294619369 | 5.043515602 | 4.812871527 | 0.220122879 | 0.155973834 |
| 0.196443832 | 3.652075555 | 5.812162122 | 1.588558937 | 1.520740929 |
| 1.660259441 | 5.129705709 | 5.572954595 | 3.720055246 | 0.768938996 |
| 0.015690258 | 5.373117083 | 4.172920191 | 1.648537204 | 1.049530026 |
| 1.386280987 | 4.256166939 | 8.189305398 | 0.091952591 | 0.068986297 |
| 1.180231457 | 6.37279111  | 5.939535293 | 1.191555343 | 0.697829171 |
| 1.065605114 | 6.126549065 | 5.911351402 | 1.063477718 | 2.071087051 |
| 2.858151334 | 5.260663441 | 9.139013358 | 0.047300185 | 0.036265332 |
| 1.80057706  | 4.379772766 | 7.057228179 | 2.47279937  | 0           |
| 0.844918405 | 5.296620924 | 4.070419181 | 1.802131861 | 0           |
| 2.900641061 | 7.000776733 | 4.719462827 | 1.841418563 | 0.676670042 |
| 2.092738406 | 5.156136956 | 6.621327715 | 0           | 0.850997345 |
| 0.337787618 | 4.680151656 | 6.04524326  | 0.248693513 | 0.174157748 |
| 0.90004757  | 6.082849986 | 7.13784106  | 0.902370852 | 0.909005728 |
| 6.118837283 | 5.050398993 | 6.280159581 | 0.074088048 | 1.889233937 |
| 4.683631829 | 6.539373119 | 5.783045195 | 0           | 1.536203834 |
| 3.493283534 | 6.311618193 | 6.099199649 | 1.0926208   | 0           |
| 3.704310193 | 5.3664467   | 5.969875911 | 1.887225002 | 2.280158257 |
| 2.905200702 | 4.815115467 | 5.787488692 | 1.226253624 | 2.571642784 |
| 2.794449985 | 5.510370094 | 7.026729958 | 0.156532227 | 0.113998774 |
| 0.103901028 | 10.45007822 | 6.048907086 | 1.96790507  | 1.299821918 |
| 0           | 6.626430392 | 4.973994416 | 0.817098355 | 1.380918188 |
| 1.935732212 | 5.815864306 | 5.344381333 | 0           | 1.300216651 |
| 0.111899708 | 4.635126273 | 6.585700649 | 0.089311817 | 1.945764114 |
| 0.215036943 | 6.022114948 | 5.133639848 | 0.165220778 | 0.119863938 |
| 0.107014207 | 8.067993033 | 4.220064424 | 1.341721195 | 2.361335884 |
| 1.345901733 | 5.470210604 | 5.727218861 | 0.082187997 | 0.061948783 |
| 0.477410603 | 11.3994217  | 5.952520011 | 2.482215396 | 0.500150025 |
| 2.070313735 | 4.687424573 | 5.467559755 | 0.098539717 | 1.979178589 |

| hsa-miR-551b-3p | hsa-miR-539-3p | hsa-miR-20b-3p | hsa-miR-1185-1-3 | hsa-miR-483-3p |
|-----------------|----------------|----------------|------------------|----------------|
| 3.581192589     | 2.867846893    | 0.108739167    | 2.018313599      | 2.523315726    |
| 1.616079856     | 1.02578271     | 2.619502735    | 2.616880929      | 7.735161189    |
| 7.189156898     | 3.459248209    | 1.35644488     | 1.820547997      | 12.27515178    |
| 7.889988778     | 1.41194027     | 0.86054536     | 0                | 3.105386209    |
| 5.046429711     | 0.017021886    | 1.654120747    | 0.01263164       | 10.82689632    |
| 5.234224769     | 2.159564814    | 1.120689791    | 1.115016602      | 2.981071764    |
| 0.272239573     | 0.252995048    | 1.735794643    | 0.164902662      | 2.466008782    |
| 1.67438509      | 1.671382043    | 0.564447396    | 0.573509608      | 4.081989771    |
| 6.377726364     | 0.764160922    | 1.686010956    | 0                | 9.128322825    |
| 6.342970307     | 3.646341996    | 0              | 1.966190664      | 12.37807822    |
| 2.077342658     | 2.077880127    | 0.108568227    | 0.089714295      | 7.681620889    |
| 3.069439571     | 1.356963451    | 0.092159868    | 0.076562486      | 9.872594621    |
| 0               | 1.52411827     | 1.52563052     | 1.528765449      | 4.091504128    |
| 5.467757424     | 0.075372126    | 2.906141361    | 0.054048535      | 1.879671398    |
| 0.968520035     | 0.968096472    | 0              | 0                | 1.958302115    |
| 0.091613382     | 1.288096599    | 0.073963068    | 0.061814087      | 4.002423156    |
| 1.89259319      | 1.891355631    | 1.219277511    | 0                | 1.897318138    |
| 5.456024046     | 0              | 3.494358688    | 0.799129344      | 0              |
| 7.331677358     | 6.72792914     | 0.122313422    | 3.986295908      | 5.936927699    |
| 1.540193656     | 3.266405993    | 0.963442114    | 1.543369658      | 5.366623562    |
| 0.503418905     | 2.286007506    | 0.351854355    | 0.270447839      | 2.264690147    |
| 0.135849059     | 2.07486025     | 0.107860486    | 0.089149848      | 4.176431247    |
| 4.514677438     | 8.927174719    | 1.851346189    | 4.601226192      | 8.747864538    |
| 3.208592499     | 0.22339358     | 1.661633514    | 0.147819697      | 8.758562625    |
| 0               | 6.558172525    | 0.863108621    | 2.626196809      | 12.00082777    |
| 1.209675987     | 1.472820823    | 1.211555723    | 0.893290325      | 12.51683378    |
| 1.037713958     | 1.038210878    | 2.048232113    | 0.008197988      | 13.17601047    |
| 5.770279        | 0.206546512    | 2.735607971    | 0.137868796      | 4.705322955    |
| 1.810584015     | 1.189114469    | 2.829316868    | 0.040585919      | 10.67980507    |
| 3.653657096     | 0              | 2.500807217    | 0.795046845      | 3.246723252    |
| 3.399906507     | 0.133833069    | 2.069314362    | 0.092873137      | 2.540350206    |
| 7.710292708     | 1.119225112    | 2.741361882    | 0.02558591       | 12.5760623     |
| 1.214437578     | 0.064548373    | 2.265343397    | 0.046576509      | 10.74842298    |
| 3.618425214     | 2.091775411    | 2.108179768    | 1.196048286      | 8.64620528     |
| 1.658480826     | 1.272438523    | 0.749937979    | 1.290130995      | 2.427953726    |
| 1.637491968     | 3.565580002    | 0.735021867    | 0.742477593      | 12.29111679    |
| 0.114617065     | 0.108287383    | 1.345900861    | 0.076217051      | 7.237152473    |
| 3.901736474     | 1.659940233    | 1.061072809    | 1.058388196      | 3.089916961    |
| 2.547401681     | 1.166642461    | 0.042342134    | 2.190545377      | 12.29280804    |
| 1.090018582     | 2.11908118     | 2.439877452    | 1.685170015      | 7.156197529    |
| 0               | 0.850688666    | 0.851533131    | 0                | 0.855088011    |
| 2.357378067     | 1.61620476     | 2.032536546    | 0.005517134      | 2.844337013    |
| 6.974478496     | 1.443915741    | 0.115396068    | 0.09514679       | 1.430939433    |
| 0.210288485     | 2.30198044     | 2.258971434    | 0.131968008      | 2.758755412    |
| 6.310594078     | 1.522273565    | 0.136571635    | 0.11184788       | 1.507302094    |
| 6.367599753     | 0.914538567    | 0              | 0                | 1.482427141    |
| 0.30814552      | 1.859490294    | 3.290753086    | 0.182985734      | 3.926712304    |
| 8.13574498      | 2.034064538    | 0.098349048    | 0.081539484      | 10.92696188    |
| 0               | 3.090523038    | 0              | 0                | 4.611453713    |
| 0.241610069     | 1.697121907    | 0.184561422    | 0.148905316      | 7.357186393    |
| 6.061397262     | 2.43099451     | 0.087590867    | 0.072875638      | 2.767769967    |
| 4.157096799     | 3.17620605     | 1.272224108    | 1.285241239      | 7.201340004    |
| 3.025295302     | 2.816645299    | 1.899060306    | 0.556376196      | 10.25118563    |
| 4.211240267     | 1.539101247    | 0.141147067    | 1.484569601      | 3.531164137    |
| 0.033634385     | 0.032050031    | 2.136850142    | 0.023571225      | 6.758571929    |
| 6.671272209     | 1.312870343    | 0.781805946    | 0                | 4.915919458    |

|             |             |             |             |             |
|-------------|-------------|-------------|-------------|-------------|
| 3.989225302 | 2.023654696 | 2.003223564 | 0.079602074 | 2.465355486 |
| 1.491388695 | 2.024080149 | 1.794532515 | 0           | 11.2779798  |
| 7.554427532 | 1.61436917  | 0.006071505 | 1.02290595  | 11.36005368 |
| 3.415690994 | 0.018187026 | 0.015823896 | 0.013486828 | 3.091276009 |
| 7.392185378 | 2.231925763 | 3.388534052 | 1.369058315 | 2.996148686 |
| 0.095937126 | 7.953651998 | 1.293656888 | 4.441295095 | 4.02009795  |
| 6.305276489 | 1.02411947  | 7.834870891 | 1.022827249 | 1.023391957 |
| 7.394330704 | 6.747471586 | 3.72844018  | 4.257718309 | 6.834995036 |
| 6.924522303 | 2.210146096 | 4.858419451 | 1.289138998 | 4.039303245 |
| 0.000407106 | 1.586618724 | 1.001345287 | 0.000291815 | 5.324103992 |
| 0.17739977  | 0.166501171 | 0.138699831 | 0.113514271 | 12.38363541 |
| 4.545860901 | 1.467503674 | 2.19313526  | 0           | 1.470116306 |
| 2.83589447  | 2.827479092 | 2.316590721 | 2.251924264 | 7.792054836 |
| 1.416154634 | 1.814093626 | 1.418265598 | 0.867478596 | 1.418586622 |
| 0           | 2.900925333 | 2.906374055 | 0           | 3.802439767 |
| 0.043727399 | 1.755593112 | 1.749709124 | 1.132753818 | 12.90373088 |
| 2.529826018 | 3.023235703 | 1.150734268 | 0.032920585 | 3.023612848 |
| 0.265156668 | 1.755745494 | 0.200859741 | 0.161251389 | 13.26287508 |
| 4.982646856 | 2.723375572 | 1.364332528 | 2.345849001 | 1.758084552 |
| 0           | 1.35469653  | 2.066354469 | 0           | 5.147671654 |
| 7.156081757 | 2.158263187 | 0.030785637 | 0.026104664 | 1.117959967 |
| 4.623466861 | 1.582188197 | 0.152905681 | 0.124581963 | 1.565798741 |
| 1.536610243 | 2.468855808 | 1.543369048 | 0           | 12.65017359 |
| 7.479450057 | 0.053497702 | 1.177671015 | 1.16879697  | 1.797776369 |
| 3.003032784 | 2.995320658 | 2.163553448 | 0.112113768 | 2.188145659 |
| 0.981780823 | 2.296348809 | 0           | 0           | 0.98209143  |
| 4.22790863  | 1.964875138 | 0.752956037 | 0           | 13.92167317 |
| 1.070645435 | 4.632183941 | 2.679842116 | 2.083666599 | 10.6383899  |
| 6.428773774 | 1.961929332 | 3.862999384 | 0           | 4.042978468 |
| 8.32328218  | 5.581742643 | 1.344458254 | 3.188495895 | 12.83498726 |
| 0.125883534 | 2.042558887 | 0.100321866 | 0.08312178  | 2.034815206 |
| 3.227885164 | 0           | 2.638838052 | 0           | 11.67764296 |
| 2.678731016 | 0.320617731 | 3.037838552 | 0.202132969 | 2.662693864 |
| 6.172298825 | 2.001955717 | 3.702526579 | 1.001403922 | 2.809492254 |
| 0.27262691  | 2.475656375 | 0.205974268 | 0.165101519 | 3.298779846 |
| 5.718188071 | 0.192349832 | 1.580970236 | 0.129349877 | 1.58776976  |
| 8.706835643 | 0.87426141  | 0.875073564 | 0           | 2.403617953 |
| 1.048511958 | 2.877808703 | 2.061913775 | 0.010545164 | 4.398171482 |
| 0           | 6.21104777  | 0.704682928 | 3.966276872 | 1.599525389 |
| 0.583935213 | 4.344368613 | 0           | 2.82742542  | 11.97993667 |
| 3.676066735 | 3.099547413 | 0.856540679 | 0           | 7.311521997 |
| 4.429255291 | 1.931859069 | 0.074930561 | 1.269077205 | 2.368439211 |
| 1.548726018 | 0           | 0.97040106  | 0           | 3.125246943 |
| 2.09344386  | 4.107418065 | 0.017999625 | 0.015329734 | 10.96091604 |
| 6.922372197 | 2.646684232 | 0.672761048 | 0.681060557 | 0.681839338 |
| 0.826538587 | 3.627015869 | 3.644501006 | 1.381256376 | 3.420777028 |
| 1.571513111 | 6.828095997 | 0           | 4.892507912 | 1.571712037 |
| 0           | 1.644999468 | 0.741707974 | 0           | 6.409037612 |
| 8.766013343 | 1.568462706 | 4.764502606 | 0.970446385 | 1.304867728 |
| 0.40372375  | 3.393035441 | 1.127204491 | 1.862390185 | 8.18206707  |
| 7.777716791 | 1.039805264 | 4.962968515 | 0.00854012  | 2.376097179 |
| 1.840841946 | 0.5245035   | 3.207621528 | 0           | 2.770931059 |
| 4.055056528 | 6.588032162 | 0.880889078 | 3.539767541 | 11.96375301 |
| 4.861463822 | 7.646300966 | 4.005375621 | 5.937745976 | 12.59916954 |
| 2.606345789 | 1.514050065 | 0.650664257 | 0           | 3.008603329 |
| 1.049768208 | 2.066190333 | 1.049762678 | 0.010818232 | 11.94780211 |
| 0.025040264 | 5.295236941 | 2.693751057 | 0.017650068 | 1.079764973 |
| 0.796278126 | 1.328604363 | 1.72667037  | 0.800601289 | 3.47474737  |

|             |             |             |             |             |
|-------------|-------------|-------------|-------------|-------------|
| 2.538873168 | 0.272730507 | 1.783832866 | 0.176018719 | 6.107660134 |
| 5.093926707 | 1.4528558   | 2.836423882 | 0           | 3.07561449  |
| 0           | 2.050201951 | 2.315989253 | 0           | 3.59992567  |
| 5.841682705 | 2.457274477 | 0           | 0.868238914 | 2.336260182 |
| 1.095709959 | 0.028221864 | 1.095492242 | 0.020803096 | 4.235386056 |
| 1.333223488 | 1.336930865 | 1.328269249 | 0.072274657 | 9.195797887 |
| 6.37569148  | 2.843265371 | 1.117932461 | 0           | 1.124100527 |
| 0           | 3.115029023 | 0.420612985 | 2.094840028 | 12.57913984 |
| 0.006044776 | 2.02651559  | 1.608724349 | 1.019048543 | 2.836314183 |
| 8.944938405 | 0.050547314 | 2.211156858 | 1.159913975 | 14.13279238 |
| 5.630812507 | 8.104150313 | 1.845950706 | 4.973188998 | 1.220423286 |
| 5.164643021 | 0.040024356 | 2.169278087 | 0.029297361 | 3.195897649 |
| 3.419206801 | 4.333100712 | 1.290242092 | 2.330137122 | 13.36778646 |
| 0.009555063 | 0.009128277 | 3.629211313 | 0.006806245 | 1.622664332 |
| 0.028496547 | 2.121926906 | 0.023574825 | 0.020039579 | 3.134931231 |
| 3.172453559 | 1.26101075  | 2.64832888  | 1.241451452 | 6.041785875 |
| 6.384837816 | 3.200816989 | 2.70652711  | 0.703013627 | 3.0869678   |
| 0.047501993 | 1.153691161 | 0.03900709  | 0.032983739 | 2.196728918 |
| 0.640870897 | 2.420039621 | 0           | 0.644386427 | 7.052362135 |
| 7.400487051 | 0.679082136 | 0           | 0.687453393 | 2.805461275 |
| 1.220134038 | 0.066327861 | 1.218242398 | 0.047811324 | 1.84613686  |
| 5.530700578 | 1.09237774  | 0.61014211  | 0           | 2.539871608 |
| 7.350168699 | 1.747441186 | 2.986040426 | 1.732069482 | 10.8958028  |
| 6.81992411  | 1.141331315 | 0.035831148 | 0.030330883 | 3.528839465 |
| 0.167726901 | 6.728209329 | 0.131604466 | 4.64864147  | 12.33538354 |
| 1.067632022 | 2.415565882 | 0.017257074 | 2.080157028 | 5.723110224 |
| 1.922640591 | 1.922418867 | 1.925125556 | 0           | 1.515231666 |
| 0.576104387 | 1.039039901 | 0.569465207 | 0           | 1.926501675 |
| 5.05074371  | 1.003999163 | 0.001001352 | 1.003791879 | 3.00586605  |
| 0.330476151 | 0.305260118 | 0.244694752 | 0.193886476 | 6.727307852 |
| 0.216671252 | 2.320399338 | 0.166999998 | 0.135468672 | 0.222955492 |
| 7.911981552 | 0.75152915  | 0.752151469 | 1.292853148 | 1.968405366 |
| 5.92058811  | 1.652177479 | 3.777487821 | 1.052345738 | 4.545690348 |
| 5.426583689 | 0.118443422 | 1.375703797 | 1.353056899 | 13.61033225 |
| 2.098041763 | 0           | 1.563467362 | 0.68635891  | 2.102870437 |
| 4.493824808 | 0.018969189 | 1.064631688 | 1.061778932 | 2.084678693 |
| 0.062554034 | 0.059425123 | 0.051068539 | 0.043007257 | 3.45793736  |
| 5.7283737   | 0.645225902 | 0.645073072 | 0           | 2.745997894 |
| 0           | 0.845246837 | 2.945497254 | 0.851221607 | 4.390408988 |
| 5.67840269  | 1.817116044 | 1.15723068  | 0.664743556 | 14.28583884 |
| 0.840182327 | 1.384730211 | 0           | 0           | 1.784692539 |
| 4.818176665 | 2.750927057 | 0.277761918 | 0.217980123 | 6.905274656 |
| 0.901582305 | 2.181853456 | 0.90097401  | 0           | 4.088499718 |
| 5.636806871 | 1.955778464 | 0.080358053 | 0.067017015 | 3.007624706 |
| 2.931369669 | 0.95397169  | 1.530097624 | 0           | 11.42643402 |
| 0           | 2.919709595 | 1.745579086 | 0           | 1.740151764 |
| 3.982651943 | 0.082029898 | 2.931683826 | 0.058599055 | 1.264892434 |
| 6.167146693 | 2.303256411 | 2.287924833 | 0.050706629 | 3.50767563  |
| 7.098192523 | 0.209183416 | 1.625089668 | 0.139437545 | 2.332007868 |
| 4.906971649 | 6.86250513  | 3.249652326 | 3.402753046 | 11.24391202 |
| 1.748878116 | 2.056809142 | 1.754867573 | 0           | 11.49564396 |
| 0.906525941 | 2.108716227 | 1.519982427 | 0           | 12.67213791 |
| 0.121675828 | 0.114870935 | 0.097121981 | 0.080554311 | 4.717965505 |
| 1.683056947 | 1.687839928 | 1.657831855 | 0.14694659  | 9.603618991 |
| 4.920693083 | 3.495434143 | 0.092994991 | 1.329788752 | 3.06944484  |
| 2.78042768  | 0.105285989 | 0.089266773 | 1.317382131 | 6.789135168 |
| 1.530948235 | 6.290758801 | 1.979255444 | 3.972696267 | 12.04603011 |
| 7.457483577 | 0.127400641 | 1.401651833 | 0.088722791 | 3.138323388 |

| hsa-miR-135b-5p | hsa-miR-4739 | hsa-miR-206 | hsa-miR-199b-5p | hsa-miR-487a-3p |
|-----------------|--------------|-------------|-----------------|-----------------|
| 1.418656815     | 0.098715365  | 1.406172615 | 9.68730518      | 2.85763264      |
| 1.025716224     | 1.614555313  | 1.615355272 | 2.844613044     | 1.616137687     |
| 2.074857917     | 0            | 0           | 6.568100739     | 4.066200351     |
| 2.598039224     | 0            | 0.860622089 | 8.049453719     | 1.412332532     |
| 0.017303423     | 1.652160376  | 1.058037301 | 4.735899327     | 0.016292788     |
| 2.159870984     | 0.028570683  | 1.727628057 | 8.524713788     | 1.731837854     |
| 0.259547189     | 0.183725871  | 0.204681526 | 1.760540922     | 0.236603823     |
| 1.909384518     | 0            | 1.036919705 | 8.043436405     | 1.031703797     |
| 0.764895035     | 2.002977156  | 2.248389365 | 3.521331323     | 0               |
| 7.001887798     | 0            | 0.731988197 | 8.737971467     | 3.035181517     |
| 3.574946447     | 2.035685845  | 0.108108046 | 8.059727083     | 1.416796497     |
| 2.792803775     | 1.337618041  | 0.091781255 | 8.658109804     | 2.782342056     |
| 0               | 0.951567933  | 0           | 3.623218218     | 0               |
| 1.251414338     | 2.294277573  | 0.064217184 | 5.135272455     | 0.071725621     |
| 7.098995625     | 1.547986436  | 1.547048526 | 1.958041015     | 0.968043651     |
| 0.088437638     | 1.273923996  | 0.07366996  | 2.704414984     | 0.08247339      |
| 3.319992438     | 0.707834845  | 1.904535684 | 5.550073164     | 0.702962694     |
| 2.680103806     | 1.731612438  | 0.792846431 | 3.129341719     | 0               |
| 0.149128666     | 0.110779858  | 0.121781673 | 2.131804036     | 6.310942631     |
| 0               | 0.964092648  | 0           | 8.163537178     | 2.532851807     |
| 3.518867914     | 0.307072042  | 0.349708249 | 4.197683291     | 0.418933455     |
| 1.415373648     | 0.097932507  | 0.107403911 | 8.655229931     | 2.515059175     |
| 0               | 0.888179349  | 0           | 0.888194827     | 6.010595182     |
| 0.22891448      | 0.164175038  | 0.182252321 | 5.499095044     | 2.372018988     |
| 0.862683049     | 0            | 1.418798155 | 4.680569715     | 5.760035037     |
| 3.003167552     | 0            | 2.256632216 | 8.441234678     | 2.076842116     |
| 6.209412167     | 1.036986171  | 1.037702388 | 5.893872465     | 1.038246599     |
| 4.972405583     | 0.152840898  | 0.169320033 | 1.633190713     | 0.194037219     |
| 3.441672012     | 1.796241796  | 2.231971051 | 1.808799011     | 1.188958329     |
| 2.270684824     | 0            | 0           | 6.894054979     | 0.7871302       |
| 3.395104745     | 2.05054066   | 0.112054311 | 5.848330861     | 0.126625138     |
| 0.035447966     | 1.114764727  | 1.117230853 | 1.116542631     | 1.727776024     |
| 1.216611277     | 0.050751648  | 0.055175796 | 1.841381191     | 1.216778684     |
| 1.548934863     | 0.678055704  | 0.674619922 | 8.27615645      | 2.095361463     |
| 0.750111501     | 0.753088813  | 0           | 7.873336877     | 2.214603377     |
| 1.25396142      | 0.738270865  | 0           | 0.740403819     | 4.32172185      |
| 0.11046808      | 1.336133348  | 0.091354672 | 0.116533394     | 0.102713431     |
| 3.26096376      | 2.399551625  | 1.061025508 | 8.960229142     | 2.080404798     |
| 2.216103783     | 1.159869651  | 1.163507107 | 3.411701504     | 0.04686546      |
| 2.119286305     | 0.021209625  | 3.293498935 | 6.334049597     | 2.444559912     |
| 1.400861471     | 0.853759644  | 0           | 2.77358712      | 0               |
| 0.007511055     | 2.031485563  | 1.025387839 | 5.210783716     | 0.007081819     |
| 1.443486297     | 0.104638764  | 1.429650255 | 2.102578053     | 0.129931986     |
| 0.201342338     | 2.229585991  | 0.161697339 | 2.29846604      | 0.18495603      |
| 5.435901011     | 2.138518757  | 0.135962549 | 2.999071518     | 0.154542879     |
| 0.914782387     | 1.892789516  | 0           | 5.217905321     | 0               |
| 0.293053183     | 1.779787955  | 0.228739102 | 1.846732054     | 0.265980174     |
| 1.379745607     | 0.089443365  | 1.369230935 | 5.517864826     | 0.110294868     |
| 3.463788012     | 0.853123735  | 0           | 2.772581875     | 1.400246132     |
| 0.23083245      | 0.165413989  | 0.183669108 | 4.664398447     | 0.211222615     |
| 0.105306546     | 2.722056021  | 0.087234215 | 7.569241981     | 1.338769493     |
| 2.604249207     | 1.278270885  | 0.746076831 | 6.825342453     | 1.652456848     |
| 2.694661525     | 1.021590742  | 0           | 9.066236533     | 1.008876634     |
| 0.173415247     | 0.127428175  | 1.519110007 | 10.93802072     | 0.159892502     |
| 1.109583491     | 3.311770723  | 1.108046433 | 1.715670657     | 0.030631194     |
| 0               | 0            | 1.317666763 | 5.434999535     | 0.780348403     |

|             |             |             |             |             |
|-------------|-------------|-------------|-------------|-------------|
| 1.370683594 | 1.987714587 | 0.095539837 | 4.938115948 | 0.107528734 |
| 1.122889525 | 0           | 0           | 7.633995877 | 0           |
| 1.024140294 | 1.612749305 | 0.006050775 | 4.896255929 | 1.024229045 |
| 1.062700296 | 3.252158027 | 1.061955158 | 0.019316254 | 0.017405992 |
| 3.344102166 | 1.355696273 | 1.630594828 | 7.814551293 | 2.792297442 |
| 2.721569559 | 1.285800693 | 1.293344366 | 1.294385891 | 5.915673176 |
| 3.73702387  | 1.023368359 | 1.023812362 | 2.355012104 | 0.006640309 |
| 3.283175824 | 0           | 0.630688865 | 4.000848635 | 5.940046447 |
| 3.293154127 | 2.640510948 | 1.971109788 | 6.41061263  | 1.656939712 |
| 0.000395485 | 1.586530378 | 0.000339404 | 3.461497094 | 1.586611577 |
| 1.529826366 | 1.494510398 | 0.138078932 | 3.52324123  | 0.157029763 |
| 0.904636192 | 2.869782145 | 0           | 6.55585484  | 2.188976536 |
| 1.674724793 | 0.159973529 | 2.315158268 | 7.597744989 | 1.668976898 |
| 1.414938555 | 1.422047769 | 0           | 5.959393532 | 0.861602039 |
| 3.069345909 | 0           | 0.93394328  | 7.437000133 | 1.503571116 |
| 1.755645208 | 0.033064653 | 1.139321946 | 3.008641473 | 0.039742459 |
| 1.769397226 | 1.147301905 | 0.038788094 | 7.110600528 | 1.768092601 |
| 0.252917921 | 1.691817453 | 0.19986329  | 5.969616906 | 0.230761095 |
| 7.166574911 | 0.821847583 | 0           | 5.9411812   | 3.303666328 |
| 0.814677645 | 1.761414949 | 2.066665687 | 1.358469961 | 0           |
| 1.121363457 | 1.722372156 | 3.162615545 | 4.355600654 | 0.033982349 |
| 1.582047707 | 2.638898921 | 0.152204144 | 3.58920815  | 0.173693045 |
| 0.665232585 | 0           | 2.305131182 | 7.435087883 | 1.162437369 |
| 1.180653708 | 2.214551909 | 0.045883629 | 5.031819529 | 2.231199308 |
| 0.16792048  | 0.123692744 | 0.136300056 | 0.178225075 | 1.520560242 |
| 0           | 1.977177797 | 0           | 0.981956938 | 0           |
| 1.964572743 | 2.240632498 | 1.669776371 | 7.715343573 | 1.276537808 |
| 0.021085433 | 2.676118897 | 1.070513513 | 1.670357759 | 4.192754634 |
| 8.882563279 | 0           | 0.922800907 | 6.808050508 | 0.479319747 |
| 0           | 0           | 2.05003679  | 1.344123718 | 5.326790065 |
| 0.121232303 | 0.0912064   | 1.376273433 | 6.645679745 | 1.386252723 |
| 3.869850331 | 1.840300835 | 1.155286315 | 5.672602469 | 0           |
| 0.329793047 | 1.856392478 | 0.254567337 | 1.939014223 | 0.297898794 |
| 1.001476414 | 1.001436371 | 0.000369325 | 5.646234095 | 2.32395003  |
| 3.298362917 | 1.707482374 | 0.204944317 | 4.871939806 | 0.236922882 |
| 0.196865271 | 4.783557519 | 0.158326167 | 3.38195429  | 0.180950469 |
| 0           | 0           | 0           | 3.127664894 | 0           |
| 1.644539224 | 2.059872467 | 0.012314879 | 1.048033837 | 2.063949597 |
| 6.273672271 | 0           | 0           | 3.750184249 | 6.223115033 |
| 0           | 0.581248211 | 1.416226526 | 5.722877425 | 3.452225814 |
| 2.374027621 | 0           | 1.410699215 | 8.000232629 | 0.855314186 |
| 3.211238893 | 0.068423891 | 0.074633039 | 8.479253705 | 1.291140667 |
| 1.548486265 | 1.550325355 | 3.128117802 | 3.276620332 | 0           |
| 1.071267598 | 2.411300857 | 0.01793642  | 0.0219969   | 5.150498331 |
| 0.673718302 | 0           | 1.178836104 | 0.67984973  | 2.933505999 |
| 5.616609418 | 0           | 1.371621945 | 5.658230287 | 2.903026614 |
| 6.552278914 | 0           | 0           | 2.569154654 | 6.172922547 |
| 0.74195235  | 2.223869334 | 0           | 6.02798623  | 0           |
| 0.950678999 | 0           | 0.50193588  | 1.576803244 | 0           |
| 2.119201556 | 1.409897497 | 0.393253687 | 9.688375967 | 2.719623993 |
| 1.63324985  | 2.048587164 | 0.009965414 | 3.058292206 | 1.633024313 |
| 1.324500531 | 0           | 0           | 1.333128728 | 0.522321231 |
| 3.137332283 | 0.882760999 | 0           | 6.939406843 | 5.303899375 |
| 3.149702307 | 0           | 0           | 7.554520237 | 7.890916865 |
| 3.925733352 | 1.834368713 | 0.650785729 | 7.441107695 | 1.515343863 |
| 1.64607537  | 0.011706949 | 0.012635143 | 9.64511521  | 0.013936543 |
| 4.447143437 | 1.678485189 | 0.020670323 | 5.486981643 | 4.979689372 |
| 2.279406881 | 0.797054336 | 0.794349814 | 7.224053751 | 2.85398429  |

|             |             |             |             |             |
|-------------|-------------|-------------|-------------|-------------|
| 0.280009672 | 2.4218039   | 1.782464768 | 2.532489234 | 1.817048535 |
| 3.741511426 | 0           | 0.996750906 | 8.905315997 | 1.641966605 |
| 1.741456824 | 0           | 0.810435712 | 3.598965453 | 0.808942221 |
| 3.126236066 | 0           | 0.42736832  | 8.48075642  | 1.174424812 |
| 1.702028414 | 2.931421256 | 1.698117465 | 5.10544324  | 0.026982811 |
| 6.778747055 | 0.079141048 | 0.086494253 | 3.646585741 | 1.980264354 |
| 3.451069564 | 2.044996616 | 1.118211379 | 8.502583523 | 2.016596261 |
| 0           | 0           | 1.674237647 | 1.85757277  | 2.183223405 |
| 3.615375651 | 0.004664845 | 0.005028071 | 9.667343447 | 0.005535724 |
| 1.170978994 | 0.03999286  | 0.043392181 | 5.512427465 | 1.789158996 |
| 2.62666796  | 1.217080922 | 0.057829044 | 4.589007327 | 6.302817307 |
| 2.507228023 | 0.031817648 | 0.03446954  | 3.522736424 | 0.038222082 |
| 1.938738805 | 1.282505284 | 1.289934495 | 7.234237937 | 3.731169641 |
| 0.009276426 | 1.6213394   | 4.366524129 | 4.957023511 | 0.008744194 |
| 0.027629222 | 3.443521981 | 0.023490976 | 3.460306014 | 0.025978918 |
| 3.17033138  | 0.061138954 | 1.254969287 | 3.543200034 | 1.260551351 |
| 2.830313148 | 4.239150037 | 1.587983765 | 7.455827247 | 1.202255941 |
| 2.530045972 | 5.105580528 | 1.150888074 | 2.529212641 | 1.153631601 |
| 3.383654006 | 0           | 1.130790893 | 6.38065295  | 2.73484007  |
| 1.555759571 | 1.193855764 | 0           | 3.546662684 | 0           |
| 0.067553653 | 0.052109493 | 3.095951669 | 0.070941037 | 0.063175593 |
| 3.420841583 | 0.61387442  | 0           | 5.366430154 | 0.608980784 |
| 1.747484713 | 0.031458157 | 2.16717269  | 7.341632867 | 0.037784098 |
| 0.042197483 | 1.135832147 | 1.138830796 | 5.711903986 | 0.039598508 |
| 0.161063603 | 1.471125522 | 1.486206391 | 5.430953261 | 5.634469702 |
| 3.561460805 | 1.066181754 | 1.665247975 | 8.376304186 | 2.903663633 |
| 2.913222768 | 3.242643266 | 0           | 5.035016868 | 0.94163556  |
| 3.257287733 | 0           | 1.404193278 | 5.753252805 | 0           |
| 1.003988614 | 1.589569486 | 1.589691124 | 6.774651212 | 1.004004339 |
| 0.313806896 | 2.945282399 | 0.243398574 | 0.338363665 | 1.900237191 |
| 0.207362286 | 3.295821362 | 9.254042305 | 3.135334151 | 0.190334529 |
| 2.214247149 | 0           | 0           | 6.031013153 | 0           |
| 0.016293159 | 1.053629549 | 1.054692099 | 2.663071757 | 1.055511241 |
| 2.042145162 | 0.090953374 | 2.019018669 | 2.037094308 | 0.112234236 |
| 1.850776051 | 0.681661222 | 1.563848595 | 4.528856873 | 0           |
| 2.901423772 | 0.015224862 | 2.407012563 | 2.677097014 | 1.065569236 |
| 0.060507175 | 1.191785358 | 5.313817379 | 3.880409848 | 0.056639743 |
| 1.506225753 | 0           | 1.516060446 | 3.107949927 | 0           |
| 6.565675236 | 0           | 0           | 8.558775924 | 2.104372039 |
| 1.522526268 | 0           | 1.157501811 | 8.407827553 | 1.152184127 |
| 1.384963131 | 1.793196018 | 0.838916063 | 2.920312938 | 2.924879785 |
| 0.361223377 | 0.245213288 | 1.961795384 | 4.681127731 | 0.324964638 |
| 0           | 1.467994337 | 0           | 6.063865166 | 2.442326235 |
| 0.096330693 | 1.296465459 | 1.304384156 | 3.909455115 | 0.089738746 |
| 3.51438646  | 0.955201523 | 0.954430381 | 6.28238476  | 2.519867872 |
| 2.178640568 | 0.605487363 | 1.746110831 | 8.667799875 | 0           |
| 1.272623332 | 2.317732722 | 1.266619625 | 6.029925574 | 0.078009793 |
| 0.071829382 | 3.465024479 | 0.060166827 | 5.718333622 | 1.235950905 |
| 3.434207145 | 0.15462505  | 0.171352319 | 6.458130131 | 0.196463997 |
| 2.784238932 | 1.331378776 | 0.089990014 | 8.180374164 | 6.57541791  |
| 0.814568975 | 2.073734739 | 0           | 7.175514972 | 1.354938647 |
| 4.015365123 | 2.826212164 | 2.135670293 | 8.405167798 | 1.738767781 |
| 0.117214138 | 0.088346183 | 0.096719147 | 1.367726168 | 0.108887367 |
| 1.688099073 | 1.633299412 | 0.181113716 | 4.960075117 | 0.208153403 |
| 0.112046974 | 6.110960718 | 0.092612329 | 5.1768807   | 1.358974939 |
| 1.345568554 | 1.327582981 | 0.088902104 | 5.516194928 | 0.099896122 |
| 0.917250984 | 0           | 0           | 3.631102325 | 4.9382564   |
| 1.41337299  | 2.031010533 | 0.106871371 | 2.864100034 | 0.120615444 |

| hsa-miR-499a-3p | hsa-miR-4784 | hsa-miR-380-3p | hsa-miR-506-3p | hsa-miR-346 |
|-----------------|--------------|----------------|----------------|-------------|
| 0.120499419     | 0.083421248  | 0.11031473     | 0.09228617     | 0.088803481 |
| 0.007020161     | 1.023900305  | 2.355910098    | 0.005655891    | 0.005477301 |
| 0               | 0            | 1.354546632    | 0              | 1.391786118 |
| 1.412584603     | 0            | 1.816101612    | 0              | 0           |
| 0.016105604     | 1.64835453   | 0.014991227    | 0.012921242    | 2.392620077 |
| 0.033861219     | 0.024656514  | 1.72839116     | 0.02694597     | 0.026053406 |
| 1.762431805     | 0.151592577  | 1.739917699    | 2.347274358    | 1.674114106 |
| 0               | 0            | 1.035705837    | 0              | 1.963742799 |
| 1.679742554     | 0            | 0              | 0              | 0           |
| 1.633105659     | 2.448543564  | 2.411283055    | 0              | 5.234461046 |
| 0.120305787     | 0.083296252  | 0.110140801    | 0.092145533    | 2.015469472 |
| 1.355168158     | 0.071213274  | 1.348745635    | 0.078583584    | 1.95636197  |
| 1.934486587     | 0            | 0              | 0              | 0           |
| 0.070796437     | 0.050429461  | 0.065322632    | 0.055409842    | 1.232316289 |
| 1.546229641     | 0            | 0              | 0              | 0           |
| 5.761014271     | 0.057612632  | 0.074963416    | 0.063396895    | 0.06113212  |
| 3.226658214     | 0.71641495   | 0.704043564    | 0              | 0           |
| 0               | 0.802323002  | 0              | 0.798052432    | 0.799614796 |
| 1.466217933     | 0.09329002   | 4.295611806    | 0.103411982    | 1.423301501 |
| 0               | 0            | 1.540868414    | 0              | 0.964973057 |
| 0.409771412     | 0.245426116  | 0.359255128    | 2.082225145    | 0.26628861  |
| 2.067437274     | 1.368234893  | 0.109420699    | 0.091563112    | 1.377001253 |
| 1.847777044     | 0            | 6.611384679    | 0              | 0           |
| 1.68370371      | 0.136188306  | 2.338913177    | 1.619008232    | 0.145912403 |
| 0               | 0            | 5.185760198    | 0              | 0           |
| 0.444844049     | 0.902487926  | 1.484710661    | 0              | 0           |
| 0.010422686     | 0.007699091  | 0.009710449    | 0.008383939    | 0.008117535 |
| 1.637854958     | 0.127185407  | 1.621343774    | 0.141953997    | 0.136118976 |
| 0.052696363     | 1.172063527  | 0.048762481    | 0.041578511    | 0.040157544 |
| 0.787134421     | 0            | 0              | 0              | 1.338141611 |
| 0.124802424     | 0.086192106  | 0.114177204    | 3.300261431    | 0.091784647 |
| 1.119106091     | 0.023968888  | 0.030538604    | 0.026190708    | 1.111450827 |
| 1.841703873     | 0.043503309  | 0.056107459    | 1.203348971    | 0.046078595 |
| 0               | 0            | 1.8571649      | 2.131352958    | 1.197145691 |
| 1.273014131     | 0            | 0.749589875    | 0              | 1.993106288 |
| 0.733512783     | 1.277903173  | 1.948471898    | 1.269603343    | 2.227206294 |
| 1.353572713     | 0.070895341  | 0.093017147    | 0.078227621    | 0.07535175  |
| 2.080141462     | 0.012466317  | 1.657939104    | 0.013588909    | 0.013151952 |
| 0.046289072     | 0.033454687  | 1.778709035    | 0.036628652    | 0.035389833 |
| 0.0250598       | 0.018345555  | 1.090075237    | 0.020022397    | 1.684747383 |
| 2.112861553     | 0            | 0.851275809    | 1.411593326    | 1.413513123 |
| 3.036710541     | 1.023839525  | 0.006527313    | 0.00564146     | 4.61765447  |
| 0.12805045      | 1.391763814  | 0.117089303    | 0.097752706    | 0.094026914 |
| 0.182013059     | 0.121836226  | 0.165048568    | 1.556149256    | 4.5702714   |
| 7.265028922     | 2.532647145  | 0.138655238    | 0.115009912    | 0.11049077  |
| 0               | 0.919811531  | 0              | 0              | 2.215154415 |
| 5.163073826     | 0.167829737  | 1.818736174    | 0.188831305    | 0.180490454 |
| 1.378150439     | 0.075790778  | 0.099745794    | 0.083713661    | 2.412365326 |
| 1.40050876      | 0            | 2.116612659    | 0              | 0.856266195 |
| 2.373286557     | 1.596400583  | 0.187619401    | 0.153402628    | 0.146980601 |
| 0.096645152     | 1.303629735  | 0.088808701    | 0.074785017    | 1.939569479 |
| 0.744462406     | 0            | 1.964715171    | 0              | 0           |
| 0               | 0            | 1.368759175    | 1.028364473    | 1.03259191  |
| 0.157452314     | 1.470263616  | 0.143318216    | 0.118712738    | 0.114018294 |
| 0.030267629     | 1.100856977  | 1.10842941     | 0.024125799    | 0.023331569 |
| 0               | 0            | 0.78147954     | 0.787296091    | 0           |



|             |             |             |             |             |
|-------------|-------------|-------------|-------------|-------------|
| 0.106034617 | 0.074009605 | 0.09729293  | 0.081716353 | 0.078692379 |
| 0.631516369 | 0.646191777 | 0.632508602 | 1.516489718 | 0           |
| 0.006588489 | 1.611217694 | 1.613635413 | 0.005309173 | 0.005141666 |
| 0.017205505 | 0.012656408 | 0.016012175 | 1.655068295 | 1.059081694 |
| 0.529248088 | 0           | 1.342733952 | 0.537682984 | 0           |
| 2.376487983 | 0.060142657 | 6.375234333 | 0.06621563  | 0.063837028 |
| 0.006565723 | 1.022362642 | 0.006120879 | 0.005290883 | 0.00512396  |
| 0           | 0           | 6.293184075 | 1.81339113  | 0           |
| 0           | 0           | 1.969398485 | 0           | 0           |
| 1.001361359 | 0.000274371 | 0.000344455 | 0.000298307 | 2.586649883 |
| 0.154644953 | 0.105055992 | 0.140824014 | 0.116733363 | 3.750377874 |
| 1.468035489 | 1.478478298 | 0           | 0           | 2.683839609 |
| 0.200421089 | 0.132857278 | 0.181229711 | 0.148452751 | 0.142286533 |
| 0           | 0           | 0.86255421  | 0           | 0           |
| 0           | 0           | 0.933767517 | 0           | 0           |
| 0.039261163 | 0.028495442 | 0.036408516 | 0.03116648  | 0.030124631 |
| 1.153162482 | 0.030807818 | 0.039419875 | 0.033711959 | 0.032578846 |
| 0.226816442 | 2.294668209 | 1.723956036 | 0.166224014 | 0.159125253 |
| 0.817922249 | 0.827938704 | 0           | 0           | 0           |
| 2.315154607 | 0.823756146 | 0           | 0           | 0           |
| 0.033575992 | 1.111543462 | 0.031164874 | 0.026722466 | 4.237372162 |
| 0.170979996 | 2.586102863 | 0.155307013 | 0.128187211 | 0.123036147 |
| 0           | 0           | 1.542083974 | 1.180466866 | 1.184086336 |
| 3.055014222 | 1.164864606 | 0.046642859 | 0.039797821 | 1.779660222 |
| 0.152594662 | 0.103779265 | 1.507482971 | 2.122938402 | 0.110752787 |
| 0.981518869 | 0           | 0.981687416 | 1.564053254 | 0           |
| 0           | 0           | 0.752609736 | 0.758889695 | 1.997344658 |
| 0.01961382  | 1.065999674 | 2.680378226 | 0.0157104   | 0.015202799 |
| 0.479029378 | 0.494052432 | 0.479387653 | 0           | 0.489616544 |
| 1.34075932  | 0.812571532 | 3.028539271 | 1.353541262 | 0           |
| 2.035920394 | 1.344434281 | 0.10175211  | 1.357389836 | 2.419717474 |
| 1.521742755 | 0           | 1.154131814 | 5.240475769 | 0.663726758 |
| 2.63775672  | 0.184947312 | 0.260678931 | 0.208785179 | 0.19929743  |
| 0.00040166  | 1.001375954 | 0.000374821 | 0.000324601 | 0.000314479 |
| 0.232835357 | 0.151771517 | 0.209506761 | 0.170225434 | 0.162911335 |
| 1.598604684 | 0.1194603   | 1.583782791 | 0.133125309 | 0.127731685 |
| 2.814165882 | 1.444032719 | 0           | 0           | 0           |
| 0.013427172 | 0.009900069 | 0.012503537 | 0.010785718 | 0.010441104 |
| 0.703180687 | 1.240686421 | 5.023174776 | 0           | 2.587595354 |
| 0           | 1.748404018 | 1.414380036 | 0           | 0           |
| 1.807058283 | 0           | 0           | 0.860586397 | 0           |
| 0.082462485 | 1.262267927 | 0.075946011 | 0.064208285 | 0.061910857 |
| 0           | 0.972116373 | 0           | 1.963827933 | 0           |
| 0.019579895 | 0.014382026 | 2.903910662 | 1.067814153 | 0.015176771 |
| 0           | 0           | 2.502357325 | 0           | 0           |
| 0           | 0.833441507 | 3.323024632 | 0           | 1.782248983 |
| 0           | 0           | 5.711906954 | 0           | 0           |
| 0.740201561 | 0.752800229 | 1.65262038  | 0.747797953 | 2.811304462 |
| 1.292282977 | 1.628185805 | 0.95164729  | 0.509283155 | 0           |
| 0           | 0           | 1.392781861 | 0           | 2.203141205 |
| 1.632918111 | 1.627999258 | 0.01011722  | 0.008733992 | 0.008456241 |
| 0           | 1.662523728 | 0           | 0.995973692 | 0.532915888 |
| 0           | 0.887079139 | 3.147737312 | 0           | 0           |
| 0           | 0           | 7.608751638 | 2.85091892  | 2.441176991 |
| 0           | 0.663696444 | 0           | 0           | 0.659867755 |
| 0.013777302 | 1.046611158 | 1.049885853 | 0.011065178 | 0.010711409 |
| 0.022577448 | 0.016553391 | 2.694370984 | 0.018059598 | 0.017473011 |
| 2.029402347 | 0           | 0.793934277 | 0.799530161 | 0           |

|             |             |             |             |             |
|-------------|-------------|-------------|-------------|-------------|
| 0.250067367 | 0.161582186 | 0.224428989 | 0.18157948  | 0.17364377  |
| 0           | 1.525958842 | 0.314773871 | 0.321624353 | 0.709703133 |
| 0           | 1.368372615 | 0.810039343 | 0           | 0           |
| 0.846588074 | 0           | 1.181165001 | 0           | 1.490079762 |
| 1.701056125 | 1.089146654 | 0.024777866 | 1.09181516  | 0.020592903 |
| 1.978855175 | 0.06726472  | 0.088053067 | 0.074165961 | 4.389633394 |
| 0.624742196 | 0           | 1.78221856  | 0           | 0           |
| 0.837420609 | 0           | 2.593347457 | 0           | 0.430324484 |
| 0.005473708 | 1.606807204 | 0.005103754 | 1.019181836 | 2.346340139 |
| 0.047625839 | 0.034393284 | 1.168732616 | 2.197923125 | 5.730613918 |
| 0.063666992 | 1.821237031 | 6.006903059 | 0.049988283 | 0.048249939 |
| 0.037760735 | 1.124968746 | 0.035025544 | 1.128843501 | 0.028995652 |
| 0.08409573  | 1.267082664 | 3.710811301 | 0.065432922 | 1.27295612  |
| 4.439343665 | 0.006393332 | 1.622509016 | 1.030216687 | 0.006739669 |
| 2.44696333  | 0.018787987 | 0.023860464 | 0.02050718  | 0.019837451 |
| 0.073457327 | 0.052243418 | 1.256079249 | 0.057424593 | 0.055397375 |
| 1.580319725 | 0           | 1.586395794 | 0           | 2.57263694  |
| 0.042614113 | 1.747185021 | 0.039496594 | 1.144830448 | 2.501966994 |
| 1.125733514 | 2.088240513 | 0           | 0           | 3.371912648 |
| 0           | 0           | 0.678850921 | 1.199591737 | 0           |
| 4.959836092 | 1.201904471 | 1.218935056 | 4.441909261 | 0.047298877 |
| 0           | 0.623741486 | 0           | 1.110972468 | 0           |
| 1.134815136 | 0.027124317 | 0.034627    | 0.029658293 | 3.750220598 |
| 2.180828934 | 1.129304681 | 0.036277608 | 0.031055715 | 3.873293301 |
| 0.14652112  | 0.099980785 | 5.221777183 | 0.110979693 | 0.106649325 |
| 0.018769307 | 0.013793485 | 0.017463101 | 0.015039804 | 1.064364389 |
| 0.941661377 | 2.513346424 | 0           | 0           | 0           |
| 0           | 1.984020258 | 0           | 0.576882788 | 0           |
| 2.00522247  | 0.000806503 | 0.001012848 | 0.000876961 | 0.000849578 |
| 0.27880439  | 0.177584298 | 1.866070106 | 0.200187005 | 0.191199189 |
| 1.626796695 | 0.125010601 | 0.169687055 | 0.139465861 | 0.133756236 |
| 0           | 0           | 0           | 0           | 0           |
| 0.015167751 | 1.051249182 | 1.054870643 | 0.012174089 | 2.064797869 |
| 1.38440715  | 1.974162601 | 1.377159111 | 1.991680332 | 0.081941399 |
| 1.854557451 | 0           | 1.562211123 | 0           | 0.687008691 |
| 0.017943692 | 0.013193433 | 1.064795501 | 0.014383711 | 0.013920364 |
| 0.055928521 | 1.79444789  | 0.051726635 | 0.044064728 | 1.185814567 |
| 1.803258819 | 1.166206885 | 0.64469262  | 0           | 0.654333074 |
| 0           | 2.388710918 | 0           | 0           | 1.407066521 |
| 0.654841041 | 0           | 1.156349362 | 0           | 0           |
| 0           | 0           | 0.838558818 | 0           | 0.844543685 |
| 0.318627409 | 0.199057826 | 0.283061197 | 0.225326079 | 0.214852551 |
| 0.900042494 | 0.90625225  | 0           | 0           | 0           |
| 0.088533696 | 0.062416855 | 0.081459183 | 0.068751817 | 0.066269864 |
| 0           | 0.956994108 | 1.529913923 | 1.532564369 | 0.956288577 |
| 0.600469235 | 1.485553518 | 1.450586446 | 8.649595997 | 2.024049549 |
| 1.272136088 | 0.054640564 | 0.07096413  | 1.254548885 | 1.251341355 |
| 0.06627382  | 1.830152543 | 0.061193691 | 0.051974594 | 3.084362236 |
| 1.64508278  | 0.128606182 | 0.174962631 | 0.143580584 | 2.668577863 |
| 0.099756911 | 1.940082572 | 4.457049007 | 0.077088322 | 0.07426046  |
| 0.813459837 | 0           | 2.065161245 | 0           | 0.821170153 |
| 0.897827817 | 0           | 1.240824923 | 0           | 0           |
| 0.107370497 | 0.074885166 | 0.098498    | 0.08269798  | 0.079632039 |
| 1.679680698 | 0.135399265 | 0.184992602 | 0.151369878 | 0.145053272 |
| 0.102721316 | 0.071832346 | 1.993444033 | 0.079276835 | 3.872431103 |
| 1.344390756 | 1.309045833 | 0.09051206  | 0.07617946  | 2.37811514  |
| 0           | 0.491170355 | 3.623909629 | 1.282955069 | 0           |
| 0.11889818  | 0.082386797 | 0.108876107 | 0.091122478 | 0.087691026 |

| hsa-miR-483-5p | hsa-miR-668-3p | hsa-miR-708-5p | hsa-miR-508-5p | hsa-miR-380-5p |
|----------------|----------------|----------------|----------------|----------------|
| 3.378454965    | 0.074232457    | 7.012487663    | 0.109567323    | 2.864007256    |
| 7.735158006    | 0.004704005    | 1.025728867    | 0.006508396    | 2.357256091    |
| 10.88756841    | 0              | 5.23988925     | 0              | 3.008773592    |
| 0.863668837    | 0              | 4.580490556    | 0.860412868    | 1.411973086    |
| 10.95033114    | 0.010715304    | 1.656277251    | 0.014907921    | 0.016720125    |
| 3.641094402    | 1.108313242    | 4.829642747    | 0.031246863    | 2.754580956    |
| 2.942495181    | 1.621562066    | 1.773837058    | 2.868690888    | 0.246112366    |
| 2.73037745     | 0              | 3.876819957    | 0.56424489     | 1.910879468    |
| 7.695208749    | 0              | 1.677725451    | 0.764658259    | 0              |
| 11.44125541    | 0.749852587    | 2.581231043    | 0              | 2.397754734    |
| 7.100650929    | 0.074123177    | 3.574330919    | 0.109394814    | 0.126064224    |
| 9.445181338    | 0.063533055    | 5.271540514    | 0.092839677    | 1.356855827    |
| 3.383353799    | 0              | 0              | 0              | 0.950172645    |
| 1.244692709    | 0.045192312    | 2.323466718    | 0.064917371    | 0.073857606    |
| 0.969009909    | 0              | 0.968167301    | 0.968374082    | 0              |
| 2.976414856    | 0.051549257    | 1.287721563    | 0.074489126    | 1.288117767    |
| 0.712115682    | 0.72350898     | 2.535660986    | 0.70421269     | 1.214091841    |
| 0.79775852     | 0              | 1.326977878    | 0.79257539     | 0              |
| 4.673198227    | 2.457613873    | 2.589842735    | 0.123268869    | 6.175596219    |
| 5.399738854    | 0              | 4.799817049    | 0              | 3.751212023    |
| 0.524229348    | 0.211667981    | 0.469966172    | 0.355731402    | 0.440671714    |
| 2.864078626    | 1.351979969    | 9.041079842    | 3.100015233    | 0.125215334    |
| 8.328055612    | 3.947674978    | 0.885866783    | 0.886264809    | 8.022614335    |
| 8.654715318    | 0.119885746    | 3.480846358    | 0.18472529     | 2.380491349    |
| 11.36288518    | 3.530722621    | 2.791546653    | 0              | 6.119124892    |
| 11.04426857    | 0.469143214    | 4.982182027    | 0              | 2.497737054    |
| 12.30193944    | 1.034147836    | 2.050304766    | 0.009657152    | 1.631276817    |
| 3.664828099    | 0.112162303    | 0.21075784     | 0.171568654    | 0.201308979    |
| 10.3307273     | 0.034092875    | 0.056825361    | 0.048470296    | 0.054886087    |
| 2.84055115     | 0              | 3.975150573    | 0              | 1.71144331     |
| 0.145518735    | 0.0766535      | 4.191666582    | 2.070728459    | 0.130828674    |
| 11.20608028    | 0.021605198    | 0.035357253    | 0.030362772    | 0.034204163    |
| 11.29926352    | 0.039044374    | 2.279795295    | 0.055765981    | 0.063279597    |
| 8.622039147    | 0.69466938     | 5.245332887    | 2.671235627    | 1.548949871    |
| 2.427565001    | 0.767108757    | 4.864664514    | 0              | 1.272323036    |
| 11.08568688    | 1.682390727    | 1.937588649    | 1.643737575    | 4.688912166    |
| 7.121424295    | 0.063253692    | 0.110137987    | 0.092407289    | 0.105967689    |
| 3.552113545    | 0.011265978    | 5.877234392    | 0.015682025    | 2.406264534    |
| 10.40787627    | 0.030092119    | 2.547088483    | 0.04262376     | 1.16675516     |
| 6.744625577    | 0.016557219    | 4.723913469    | 0.023160227    | 2.44556333     |
| 1.404581096    | 0.863094346    | 0.851052982    | 0              | 0.85040905     |
| 0.007877023    | 1.611683108    | 2.621423814    | 0.006491756    | 1.616169371    |
| 1.431711231    | 0.078471627    | 2.558962421    | 0.116285994    | 0.134272521    |
| 3.11154512     | 0.107560841    | 0.200636039    | 0.163817154    | 0.191780646    |
| 1.508240003    | 0.091747442    | 0.166925994    | 0.137666412    | 2.192922837    |
| 3.040711949    | 0              | 3.191449905    | 0.915122409    | 1.885989705    |
| 1.839898895    | 0.146827627    | 0.291871229    | 0.232078504    | 1.856293834    |
| 9.624200119    | 0.067551184    | 3.32648502     | 0.099083318    | 2.032491467    |
| 4.278880231    | 0              | 1.400009071    | 1.80340351     | 2.774245126    |
| 7.392099509    | 0.120725628    | 2.393730141    | 0.186167099    | 1.695387298    |
| 1.33018026     | 0.060548145    | 4.185124668    | 0.088231177    | 2.428797637    |
| 6.834154836    | 2.008363233    | 3.287968099    | 0.745776822    | 3.292047688    |
| 10.21195298    | 0.570394133    | 5.332822424    | 2.286676787    | 1.881522969    |
| 3.297225499    | 0.09457526     | 6.867867015    | 0.142287771    | 1.538343971    |
| 6.728193063    | 0.019918055    | 1.717479338    | 1.713375182    | 0.031462273    |
| 3.960620823    | 0              | 3.731242378    | 0              | 0.780610104    |

|             |             |             |             |             |
|-------------|-------------|-------------|-------------|-------------|
| 3.515682022 | 0.065988572 | 3.314772801 | 0.096649766 | 0.110968316 |
| 10.16901785 | 0           | 4.88282465  | 0           | 2.234268245 |
| 10.67676087 | 0.004416256 | 2.031918758 | 0.006108652 | 2.355099848 |
| 2.407305689 | 0.011437275 | 3.091428899 | 2.079177112 | 1.062926746 |
| 1.346728011 | 0.553549528 | 3.560982487 | 1.629025738 | 1.852105982 |
| 3.752054524 | 4.125712472 | 1.300501244 | 0.077880141 | 7.420701297 |
| 1.023426278 | 0.004401075 | 3.035338126 | 0.006087569 | 0.006810439 |
| 7.028143819 | 2.822482322 | 1.484926353 | 2.247878888 | 7.16882614  |
| 4.039022247 | 0.766339771 | 4.335608079 | 0           | 2.211234361 |
| 5.494034823 | 0.000248639 | 2.809329264 | 1.001346935 | 2.001792584 |
| 10.38755402 | 0.093064527 | 0.169671639 | 0.139815897 | 1.529391343 |
| 1.469963769 | 0           | 3.312077039 | 0.90498167  | 0.904197781 |
| 7.396618756 | 1.54998055  | 3.459955091 | 1.647348244 | 0.211524733 |
| 2.128877794 | 2.158660388 | 3.949581177 | 0           | 2.384639633 |
| 3.220469484 | 0           | 3.703885501 | 0           | 2.489557798 |
| 11.19995406 | 0.025659506 | 1.755655409 | 1.750076017 | 0.040843567 |
| 1.765901689 | 0.027727524 | 3.683940624 | 0.039188401 | 0.044257877 |
| 10.79353116 | 1.609093388 | 4.168361052 | 0.202653498 | 2.449906777 |
| 1.757791979 | 0.8328196   | 3.708317744 | 0.819119729 | 0           |
| 3.785765595 | 0           | 1.747837293 | 1.358596883 | 0.813745385 |
| 1.728765235 | 0.022039231 | 1.121418539 | 0.030985185 | 2.486084768 |
| 0.202255011 | 0.101778201 | 0.188118411 | 0.154167117 | 0.179977741 |
| 12.26155784 | 0           | 4.232100943 | 1.16699952  | 1.533957754 |
| 1.175837015 | 0.032655374 | 2.2343247   | 1.177955751 | 1.801599015 |
| 2.649225788 | 2.503652289 | 2.198591898 | 0.138009185 | 2.194319607 |
| 0.982065773 | 0           | 0           | 0.981706136 | 2.296443077 |
| 11.89087359 | 0           | 2.929135625 | 0           | 0.751803093 |
| 9.341133703 | 2.077341268 | 0.021033207 | 0.01814419  | 2.908913805 |
| 4.208482017 | 0           | 4.896875425 | 0           | 2.296463986 |
| 11.28658431 | 2.342560158 | 2.039598013 | 0           | 4.926976593 |
| 1.37682665  | 0.068825932 | 3.105693116 | 2.022067595 | 0.116195808 |
| 10.72446375 | 0           | 6.664115172 | 6.466724649 | 0           |
| 0.359489614 | 0.161276326 | 0.328393402 | 0.258428239 | 0.311037736 |
| 0.000450951 | 0.000270553 | 2.001957864 | 0.000372809 | 0.000416401 |
| 0.280890211 | 0.133193259 | 3.578236754 | 0.207828554 | 0.246449068 |
| 3.614607809 | 0.105514008 | 3.375625152 | 0.16038983  | 2.284518253 |
| 0.877819176 | 0           | 0           | 0           | 0           |
| 2.653950286 | 0.008952011 | 3.532844058 | 0.012434458 | 1.64447425  |
| 1.59906605  | 3.697411593 | 0.70511959  | 0           | 5.651839959 |
| 11.37484941 | 1.093709886 | 3.182940101 | 0.577275807 | 4.470704943 |
| 7.166431711 | 0.867777555 | 3.234589579 | 0           | 2.950644155 |
| 1.926035225 | 0.052192929 | 5.88889032  | 0.075464553 | 2.370355799 |
| 2.280794433 | 0           | 2.280354504 | 1.549343212 | 0.970059921 |
| 11.07892679 | 0.012991621 | 1.671418287 | 1.070544946 | 3.102621849 |
| 0           | 1.213057513 | 0.673534533 | 0           | 3.268809386 |
| 4.836548385 | 0           | 4.467971614 | 0           | 3.05039711  |
| 0.989206433 | 4.074411921 | 2.98360888  | 0           | 6.77722595  |
| 4.768072952 | 0.759253315 | 3.661596781 | 0.741517179 | 1.94871107  |
| 1.579777306 | 0.525421291 | 1.568705057 | 0           | 0.948363049 |
| 8.048550365 | 0.416830144 | 5.808091647 | 0           | 3.948763108 |
| 1.038660531 | 0.007255073 | 2.052393423 | 0.010061638 | 0.011269156 |
| 2.651918479 | 0           | 6.227028876 | 1.332359657 | 0           |
| 10.93947271 | 2.854670135 | 2.819194763 | 0           | 5.978782893 |
| 10.64033468 | 3.448335232 | 3.631543108 | 2.429414635 | 8.465805298 |
| 1.154753018 | 0.671582573 | 4.154666925 | 0           | 2.264222902 |
| 10.49275233 | 0.00918293  | 5.778711018 | 0.012757925 | 2.065993466 |
| 1.079885718 | 1.073051966 | 3.707607139 | 0.020875022 | 4.70832721  |
| 3.255895181 | 0           | 5.211719208 | 0           | 0.793048795 |

|             |             |             |             |             |
|-------------|-------------|-------------|-------------|-------------|
| 5.536474349 | 0.141532429 | 0.278901263 | 1.786259357 | 0.265097544 |
| 1.653101368 | 0           | 5.424540543 | 1.249821136 | 1.805091846 |
| 3.396219469 | 0           | 0.809998219 | 0           | 1.348887275 |
| 2.044412653 | 0           | 6.346884017 | 0.427098326 | 2.332414293 |
| 3.603653688 | 0.017596087 | 2.454201269 | 2.713149946 | 0.027708699 |
| 10.75254537 | 0.060060905 | 2.767194458 | 0.087481301 | 0.100176616 |
| 1.487218205 | 0.64768902  | 4.930603154 | 0.625888302 | 2.222745359 |
| 11.62930581 | 2.713614113 | 1.165121227 | 0           | 4.347178284 |
| 2.613327867 | 0.003672248 | 5.914125555 | 1.019906102 | 1.609389666 |
| 12.37764091 | 0.030929964 | 3.048838399 | 2.211732659 | 1.171454298 |
| 0.072855596 | 4.830202134 | 1.226934494 | 0.058451124 | 8.072845482 |
| 1.746179729 | 0.02470707  | 1.749322421 | 0.034821853 | 1.748966682 |
| 11.48656168 | 1.874922483 | 3.589078861 | 0.07693784  | 4.746249636 |
| 1.030812854 | 0.005785681 | 2.629896712 | 0.008012968 | 1.623438454 |
| 2.71519356  | 0.01695484  | 0.027559754 | 0.023725137 | 2.448508946 |
| 7.759278633 | 1.841598992 | 0.079491184 | 0.06732673  | 1.261066722 |
| 4.004489419 | 0           | 3.303546295 | 1.206730873 | 2.522706949 |
| 1.766245076 | 0.027780105 | 1.76975622  | 0.039264629 | 1.153804289 |
| 6.465415699 | 0           | 4.228117473 | 0           | 1.125292081 |
| 3.17083062  | 0           | 0.679929023 | 0           | 0.678351743 |
| 2.890194065 | 0.040062508 | 0.067368373 | 4.205275284 | 1.850616989 |
| 2.379121124 | 0.632122718 | 5.399336969 | 0           | 0           |
| 8.544228511 | 1.118987479 | 4.108031281 | 0.034425804 | 0.038826282 |
| 3.668084253 | 1.124470993 | 0.042087868 | 1.749501225 | 0.040695268 |
| 10.168477   | 1.421155343 | 2.630946876 | 0.132650052 | 6.553332491 |
| 5.237042738 | 0.012461629 | 4.426414116 | 0.017365501 | 3.098471235 |
| 0.943410326 | 0           | 2.50116567  | 0           | 0.941654451 |
| 2.739734553 | 0           | 5.012342647 | 0           | 1.9194029   |
| 2.005211337 | 1.003591063 | 3.175868066 | 1.003959147 | 1.589825228 |
| 6.216094595 | 0.155071882 | 0.312503884 | 0.247030481 | 0.296324019 |
| 1.617213901 | 0.110292627 | 0.206627726 | 0.168411253 | 0.1974227   |
| 1.968009824 | 0           | 3.185226021 | 0           | 1.660149833 |
| 4.255538642 | 0.010098724 | 1.055358013 | 0.0140421   | 1.055534132 |
| 11.57933214 | 0.06864311  | 1.386206854 | 1.376478556 | 0.115857761 |
| 2.494844978 | 0           | 0.678833912 | 0.677915568 | 1.180238074 |
| 1.0636418   | 1.058335087 | 2.677257604 | 0.016604018 | 1.065600845 |
| 4.762793626 | 0.036096649 | 3.088471469 | 1.196831003 | 0.058269373 |
| 2.049595548 | 0           | 1.506135609 | 0           | 1.137442679 |
| 4.39025003  | 0           | 5.723622354 | 0           | 1.393861775 |
| 12.28060035 | 0           | 4.958869543 | 0           | 2.457249727 |
| 0.842538052 | 1.408594778 | 0.838382025 | 0           | 0.837674233 |
| 6.872722838 | 0.173122943 | 2.757664591 | 0.280540878 | 0.339861173 |
| 2.18323478  | 0           | 2.440377482 | 0           | 0.900067201 |
| 1.303550407 | 0.05579014  | 1.312000708 | 1.30528983  | 0.092508295 |
| 10.96511434 | 0.958381488 | 2.257757451 | 0           | 0.953900665 |
| 0           | 0           | 4.346297833 | 9.772609347 | 3.034563048 |
| 1.904568616 | 0.048921391 | 3.383198406 | 1.267376258 | 0.080359536 |
| 1.862138391 | 0.042446432 | 3.333526904 | 0.060817276 | 0.069111506 |
| 0.230247829 | 0.113382908 | 2.80582224  | 0.173635711 | 0.203857036 |
| 11.35768145 | 3.534574867 | 3.659435648 | 0.091024113 | 4.954684276 |
| 11.55929308 | 1.381249742 | 5.57514232  | 0.814669855 | 0.813636083 |
| 11.91830142 | 0           | 5.428021883 | 0.901483475 | 0.898278146 |
| 5.728808912 | 0.06675684  | 0.116859365 | 0.097845366 | 0.112379771 |
| 9.318297706 | 0.119209885 | 0.226543246 | 0.183566639 | 2.375968722 |
| 2.794117907 | 0.06407692  | 1.359734992 | 1.351151415 | 2.791387851 |
| 6.844509425 | 1.295906111 | 2.440027717 | 0.089921502 | 0.103043316 |
| 11.41672361 | 1.611085847 | 1.956072437 | 0.476656962 | 4.297936531 |
| 1.402370462 | 0.073327905 | 2.522621441 | 0.108140424 | 0.124573565 |

| hsa-miR-3681-5p | hsa-miR-376a-3p | hsa-miR-802 | hsa-miR-202-5p | hsa-miR-211-5p |
|-----------------|-----------------|-------------|----------------|----------------|
| 0.100790597     | 4.592538303     | 2.078910701 | 3.073093646    | 2.069181435    |
| 0.006082297     | 1.616284381     | 0.007438405 | 1.02488959     | 0.006946847    |
| 0               | 2.840811827     | 2.212819253 | 0              | 0              |
| 0               | 1.412024554     | 0.859789011 | 0              | 3.69207661     |
| 3.53784375      | 1.058792884     | 2.402566652 | 0.013503064    | 0.015933793    |
| 0.029088823     | 0.036250118     | 0.036016293 | 1.117579794    | 0.033485176    |
| 0.188214613     | 2.477275898     | 0.254505144 | 0.180558276    | 0.228822906    |
| 0               | 2.727972178     | 0.565734722 | 0              | 0              |
| 0.767133156     | 0               | 7.380183282 | 0.76845561     | 3.331295122    |
| 0               | 3.028107679     | 0           | 0.735762292    | 0              |
| 0.100634505     | 0.130576986     | 2.526985862 | 1.39187127     | 0.118715602    |
| 0.085617793     | 2.007795206     | 2.007519723 | 0.082687017    | 1.354420765    |
| 0               | 0.95032544      | 0           | 0              | 0.950217457    |
| 0.060121718     | 1.251646004     | 4.953893726 | 0.058163439    | 0.069946053    |
| 0.968841761     | 1.957630314     | 0           | 0              | 3.123608687    |
| 1.904255121     | 0.087782963     | 0.087151961 | 0.066602644    | 0.080383063    |
| 0               | 2.847133309     | 0           | 1.916834871    | 5.322063139    |
| 0               | 0               | 3.474114583 | 0              | 2.027981632    |
| 0.113162998     | 7.38162356      | 0.146701436 | 0.10908936     | 0.134070512    |
| 0.963937326     | 2.945326372     | 2.945417286 | 0              | 1.540211102    |
| 0.316033105     | 2.29022911      | 0.460328206 | 0.300802502    | 2.243063485    |
| 0.099988161     | 0.129690386     | 1.415794164 | 0.09647297     | 1.41231066     |
| 0               | 7.928457697     | 0           | 0              | 0.885408987    |
| 1.642351196     | 1.692322734     | 2.848831657 | 2.738730623    | 0.202904276    |
| 0               | 6.461981594     | 2.602431901 | 0              | 0              |
| 0               | 2.225585978     | 0           | 0.884672948    | 0.444642389    |
| 0.00902046      | 1.631334538     | 2.374432405 | 0.00875725     | 3.376834647    |
| 0.156387574     | 1.645093502     | 0.20769272  | 0.150332595    | 0.188055657    |
| 0.045002916     | 2.244446776     | 4.277958912 | 0.043581835    | 1.808648904    |
| 0               | 0.78817571      | 0           | 0.791961767    | 0              |
| 0.10425474      | 0.135554947     | 0.13448798  | 0.10056106     | 0.123139191    |
| 0.028269664     | 0.035213227     | 0.034986613 | 0.027408351    | 0.032533117    |
| 1.208657061     | 0.065272095     | 0.064823933 | 0.050062683    | 0.059997267    |
| 3.092543476     | 1.845200939     | 1.17598167  | 3.597100414    | 0              |
| 0               | 0.749767216     | 0           | 0.753682192    | 1.273385918    |
| 0               | 4.838524382     | 1.635485142 | 0              | 0              |
| 0.085224596     | 0.109614504     | 0.10879235  | 0.082309447    | 1.352830903    |
| 0.014634334     | 3.260781098     | 0.017979303 | 0.014201796    | 0.016763259    |
| 0.039610265     | 0.049652461     | 2.215768105 | 4.212654209    | 0.045760869    |
| 1.689186507     | 2.446364359     | 1.09114309  | 0.020939661    | 2.443569047    |
| 1.407462958     | 0.850935465     | 0           | 1.810851431    | 2.370715367    |
| 0.006066763     | 1.025681257     | 0.007419345 | 1.024826228    | 3.358990327    |
| 1.419974698     | 1.443756344     | 0.138052627 | 0.10305978     | 3.753489479    |
| 3.883128581     | 1.61715311      | 0.197764984 | 0.143767087    | 0.17933608     |
| 2.143692172     | 1.522217537     | 1.522294546 | 0.121467346    | 0.150076492    |
| 3.203562339     | 0               | 0           | 0              | 0.91443615     |
| 0.2097138       | 0.290002358     | 0.287080854 | 2.891133701    | 0.256857972    |
| 1.361399884     | 1.380019278     | 8.471009752 | 0.088131525    | 3.830017798    |
| 0.852580719     | 2.58340709      | 0           | 0              | 0.849727897    |
| 0.169335309     | 0.228640392     | 0.226537024 | 0.162643209    | 2.369181008    |
| 0.081424406     | 1.339511948     | 1.339677291 | 0.078659267    | 1.98060865     |
| 0               | 2.91773365      | 0           | 0              | 1.268322745    |
| 0               | 2.262352418     | 1.88029221  | 1.91809889     | 0              |
| 0.13025521      | 1.53907384      | 3.72363934  | 1.499704119    | 0.155229645    |
| 3.845206266     | 1.109704569     | 0.032177468 | 0.025241956    | 0.029934172    |
| 3.266165173     | 1.701545069     | 0           | 1.323846149    | 2.265786093    |

|             |             |             |             |             |
|-------------|-------------|-------------|-------------|-------------|
| 0.089080346 | 1.370956385 | 1.371116989 | 0.086011129 | 1.368407637 |
| 0           | 1.122478326 | 0.633396917 | 1.809290231 | 0           |
| 0.005709082 | 2.842302406 | 0.006980585 | 0.005543768 | 0.006519753 |
| 4.543858241 | 1.062772805 | 0.018257069 | 0.014419246 | 5.70704428  |
| 0           | 2.782066647 | 0.531928496 | 0           | 0           |
| 0.071984686 | 7.726923014 | 1.300812708 | 0.069584241 | 0.084088287 |
| 0.005689396 | 1.024085921 | 1.614269844 | 0.00552466  | 4.283464773 |
| 0           | 7.282402662 | 0           | 0.634979466 | 0           |
| 2.232528495 | 3.588806062 | 0           | 0           | 3.99029224  |
| 2.001686537 | 2.809327515 | 0.000390737 | 2.3236488   | 3.461413273 |
| 0.128039069 | 2.66136909  | 0.167364991 | 1.491744737 | 0.152472386 |
| 2.868660198 | 1.87189765  | 6.446421288 | 0           | 0.904232291 |
| 0.163731236 | 2.367890226 | 2.366729804 | 0.157317328 | 2.800361827 |
| 0           | 2.126626264 | 0           | 0           | 2.964204905 |
| 0           | 2.900663377 | 0           | 0           | 1.503866977 |
| 0.033670471 | 0.042067002 | 1.141781537 | 0.032632511 | 0.038819936 |
| 0.036437095 | 1.153223347 | 0.045293699 | 1.146708235 | 0.042049381 |
| 0.18389394  | 1.756312184 | 1.756027975 | 3.13427851  | 0.223237296 |
| 0.821219406 | 3.877224002 | 6.345179403 | 0           | 0           |
| 2.072200213 | 0.814427425 | 0           | 0           | 1.750274702 |
| 0.028846387 | 1.121495892 | 8.648114449 | 0.027966394 | 0.033203352 |
| 5.074854224 | 1.582244944 | 7.146817667 | 0.135565267 | 2.24701183  |
| 0           | 1.829218821 | 0           | 0           | 0           |
| 0.043061842 | 2.565860934 | 0.053720759 | 3.688328866 | 2.827887354 |
| 0.126418273 | 2.198258433 | 0.16509719  | 0.121761158 | 2.633080747 |
| 0           | 2.780484227 | 0           | 0           | 0           |
| 1.285624053 | 1.276511053 | 0           | 0           | 2.221455523 |
| 0.016925506 | 5.664794369 | 5.664369146 | 0.01642265  | 2.683020726 |
| 1.557034443 | 0.920434302 | 3.523090425 | 0.484175442 | 0           |
| 0           | 4.582621177 | 0           | 0           | 0           |
| 0.093095868 | 3.104982159 | 2.829484357 | 0.089864209 | 2.477222132 |
| 0           | 0           | 0           | 0.658892721 | 0.653125736 |
| 0.232660292 | 0.326181687 | 0.32272757  | 4.002804143 | 0.287228083 |
| 0.000348737 | 2.001957461 | 1.001479613 | 1.001431485 | 0.000397531 |
| 0.188450123 | 3.295471327 | 0.254857765 | 1.702839656 | 1.760380963 |
| 0.146436571 | 3.09576948  | 0.193392613 | 0.140857718 | 0.175487519 |
| 0           | 0.874465523 | 0           | 0           | 5.014765496 |
| 2.384250771 | 3.881573618 | 0.014240134 | 0.011268837 | 3.069461375 |
| 0           | 7.040674293 | 1.214757583 | 0           | 0.703202153 |
| 0.580276565 | 3.273974489 | 0           | 1.06309394  | 0.57622658  |
| 1.815390323 | 2.78145952  | 0           | 1.817413437 | 0           |
| 1.279076253 | 2.98161577  | 0.088323125 | 1.276067353 | 1.926417054 |
| 2.545542523 | 1.548471638 | 0           | 0           | 0.970094096 |
| 0.016896412 | 5.016422945 | 0.020783617 | 0.016394454 | 0.019369342 |
| 0           | 4.440031132 | 1.173741267 | 0           | 2.095122489 |
| 0           | 3.718286566 | 0           | 0           | 0           |
| 0           | 7.286271509 | 2.306541337 | 0           | 2.306824951 |
| 3.202784822 | 1.262216842 | 0           | 0           | 3.055185339 |
| 0           | 1.291675699 | 3.805650316 | 0           | 0.50086132  |
| 0           | 3.665329253 | 4.021584616 | 0.811860929 | 0           |
| 0.009397683 | 2.052379836 | 10.02155444 | 0.009123228 | 2.37552335  |
| 0           | 0.525383732 | 0           | 6.243677033 | 4.451711784 |
| 1.847417943 | 5.163971778 | 1.437377131 | 0           | 0           |
| 0           | 9.508781379 | 0           | 0           | 0           |
| 1.155470942 | 2.753483623 | 0           | 0           | 0           |
| 0.011911025 | 0.014702486 | 0.014612193 | 1.642319196 | 0.01363112  |
| 0.019464636 | 6.681221997 | 0.023975708 | 0.018883033 | 0.022332992 |
| 0           | 2.026200647 | 2.279822669 | 3.029005559 | 1.329610138 |

|             |             |             |             |             |
|-------------|-------------|-------------|-------------|-------------|
| 0.201410782 | 1.82701312  | 0.274407053 | 0.19305598  | 3.584248243 |
| 1.999954057 | 2.322888727 | 1.240297495 | 1.490041769 | 0           |
| 2.06572796  | 2.049965463 | 0           | 0.813490257 | 0.809017463 |
| 0.856221089 | 2.189338864 | 0.848834589 | 0.85961683  | 1.175515319 |
| 0.022959044 | 1.702047497 | 0.028333107 | 3.294656608 | 0.026373755 |
| 0.080741532 | 0.103584273 | 0.102816279 | 1.317633844 | 0.094600883 |
| 1.123606415 | 3.940861075 | 0           | 0           | 3.769788802 |
| 0.846959382 | 3.872715196 | 0           | 0.424897236 | 0           |
| 0.004744787 | 3.199693547 | 0.005798539 | 2.347258116 | 0.005416753 |
| 0.040737119 | 1.171155191 | 2.55279977  | 0.039462229 | 0.047080818 |
| 0.054186699 | 8.281044752 | 4.331538846 | 0.052442836 | 0.062913354 |
| 3.7632754   | 1.749325604 | 0.040186377 | 0.031402944 | 2.502605569 |
| 0.071123892 | 3.743084081 | 0.090093552 | 0.068756138 | 0.08305827  |
| 0.007486602 | 2.365607762 | 1.031710282 | 1.030613103 | 4.134007605 |
| 3.292273357 | 1.697783553 | 0.02727585  | 0.021447749 | 3.301654366 |
| 0.062330169 | 2.669873438 | 0.078576441 | 1.871544146 | 1.89138164  |
| 0           | 2.335612323 | 0           | 0           | 0           |
| 0.036507542 | 0.045683848 | 0.045382996 | 0.035375249 | 1.153247624 |
| 0           | 2.419217935 | 0.636208367 | 0           | 0           |
| 0           | 0           | 0           | 0           | 1.182621918 |
| 1.834390043 | 0.067074348 | 0.066612081 | 0.051400082 | 0.061635085 |
| 2.227496081 | 1.092902325 | 1.454596724 | 0           | 2.547188478 |
| 0.032032441 | 1.747498757 | 0.039723897 | 0.031048463 | 0.036910743 |
| 0.03355014  | 0.041913849 | 2.781137096 | 0.032516157 | 2.776029395 |
| 0.121605621 | 5.567264059 | 0.15838716  | 1.468540892 | 2.162387652 |
| 0.016201085 | 3.423109669 | 1.068483616 | 1.065938361 | 0.018567846 |
| 0           | 1.922366346 | 0           | 0           | 0.941700968 |
| 1.704634401 | 1.394266674 | 0           | 0.573989263 | 0           |
| 2.590189906 | 1.003993458 | 0.001149191 | 0.000915281 | 3.175681857 |
| 0.222754623 | 1.913098067 | 0.307226456 | 0.213228158 | 0.274060706 |
| 3.727578166 | 0.205464618 | 0.203642361 | 0.147660709 | 4.722445926 |
| 0           | 0.751965431 | 0           | 0           | 0           |
| 1.053889891 | 2.072850326 | 0.016090093 | 1.05343521  | 1.05540967  |
| 1.367255372 | 0.11992374  | 0.119006592 | 0.08961555  | 1.383553486 |
| 0.680770587 | 1.554003515 | 3.849828525 | 0           | 5.770435985 |
| 0.015492501 | 1.664306622 | 2.677049992 | 1.659310965 | 1.663503421 |
| 4.065264828 | 0.060084147 | 1.200334591 | 1.190974797 | 3.446194992 |
| 0           | 0.645873687 | 5.858547095 | 0           | 0           |
| 0.847825004 | 3.082174267 | 0           | 0           | 0           |
| 0           | 2.271427332 | 0.65654494  | 2.095172454 | 0           |
| 0           | 0.838253752 | 0           | 0.841634319 | 2.095158074 |
| 2.609055905 | 0.357100951 | 2.029083828 | 0.240590488 | 0.312907134 |
| 0           | 1.462440114 | 0.90029366  | 0           | 3.173656094 |
| 0.074775514 | 1.312148544 | 0.094908458 | 0.072268429 | 0.0874319   |
| 0.955010049 | 3.100899648 | 0           | 4.891366822 | 0           |
| 0           | 2.79747356  | 1.081585347 | 0.606225466 | 0.600416874 |
| 0.065253554 | 1.272866109 | 7.001126727 | 0.063106214 | 1.905170869 |
| 0.056359811 | 1.236067781 | 0.070819393 | 1.224550773 | 0.065485094 |
| 0.158224143 | 0.21225224  | 3.429049272 | 1.598712345 | 1.642929779 |
| 0.083966454 | 6.812704632 | 0.10711226  | 0.081101171 | 0.098488161 |
| 0           | 2.527478596 | 0           | 1.364440438 | 0           |
| 0.907916396 | 1.735404253 | 0           | 0.911329993 | 0           |
| 0.090166083 | 0.116296802 | 0.11541342  | 0.087053144 | 5.869347449 |
| 1.638719264 | 1.688172942 | 0.223166068 | 5.722063405 | 0.201594147 |
| 1.342771156 | 2.011425972 | 6.402292094 | 1.973995432 | 2.003468917 |
| 3.00211982  | 0.106568782 | 0.105774113 | 0.080137482 | 0.097277872 |
| 0           | 4.211261589 | 0           | 1.796402568 | 0           |
| 0.099499253 | 0.129020174 | 0.128016688 | 0.09600437  | 1.410347929 |



| hsa-miR-1911-5p | hsa-miR-200c-5p |
|-----------------|-----------------|
| 0.123532671     | 0.103358718     |
| 0.007158557     | 0.006208418     |
| 0               | 0.77649036      |
| 3.483836167     | 0.861568646     |
| 2.401755764     | 0.014207654     |
| 0.034572472     | 0.029725829     |
| 0.239630403     | 0.193814119     |
| 0               | 0               |
| 0               | 0.766289341     |
| 0               | 0               |
| 0.123333044     | 2.817802197     |
| 0.104251898     | 1.342483388     |
| 0               | 0               |
| 0.072409283     | 0.061531977     |
| 1.546109658     | 0               |
| 0.083277075     | 0.070531842     |
| 6.192553484     | 0               |
| 1.326878825     | 0               |
| 0.139440698     | 2.096741219     |
| 0               | 0               |
| 0.4257933       | 0.327340399     |
| 0.122506715     | 0.102531866     |
| 0.885317622     | 0               |
| 0.212088706     | 1.648883262     |
| 0               | 0               |
| 0               | 3.306778449     |
| 0.010629864     | 6.281111726     |
| 0.196356357     | 0.160799061     |
| 0.053850985     | 0.046024445     |
| 0               | 0               |
| 0.127969828     | 0.106928985     |
| 0.033587169     | 0.028887564     |
| 0.062065171     | 0.052910123     |
| 1.84729389      | 0               |
| 0               | 0               |
| 0               | 0               |
| 0.103755556     | 0.08733033      |
| 0.017286497     | 0.014944125     |
| 0.04728904      | 0.040498654     |
| 0.025575571     | 0.02205234      |
| 3.23042762      | 0               |
| 0.007140226     | 0.006192557     |
| 0.131320296     | 0.109618663     |
| 0.187133463     | 0.153657509     |
| 1.520200625     | 0.129481361     |
| 3.676856733     | 0               |
| 0.269536474     | 0.216169521     |
| 0.111430478     | 0.093572955     |
| 0               | 0               |
| 0.213818795     | 0.174218567     |
| 0.098967034     | 0.083420864     |
| 0               | 0               |
| 0               | 0               |
| 0.161695688     | 1.51099107      |
| 0.030898167     | 1.711156122     |
| 0               | 0               |

|             |             |
|-------------|-------------|
| 3.967801218 | 0.091298403 |
| 0           | 7.416172534 |
| 0.006718237 | 0.005827356 |
| 6.617820293 | 0.015173344 |
| 6.393880383 | 3.479430347 |
| 0.087139187 | 0.073715854 |
| 0.006695016 | 1.0236031   |
| 0.62947206  | 0           |
| 5.978907403 | 1.279206505 |
| 0.000376276 | 0.000327038 |
| 0.158791778 | 0.131473421 |
| 0           | 0           |
| 0.206236901 | 1.633309333 |
| 0.861608544 | 0           |
| 0.933192285 | 1.506255552 |
| 0.040096038 | 0.03441558  |
| 4.747313599 | 0.0372485   |
| 0.233686355 | 0.189326574 |
| 0.817927483 | 0.820510196 |
| 0.81357826  | 0           |
| 2.752131696 | 1.118394536 |
| 0.175699239 | 0.14475113  |
| 0           | 0           |
| 7.638434074 | 0.044035113 |
| 0.156671455 | 1.496755664 |
| 0           | 0           |
| 0           | 1.673499463 |
| 2.093022036 | 0.017285759 |
| 0           | 0.481373916 |
| 0           | 0.804653011 |
| 0.11372344  | 0.095432453 |
| 0           | 4.044411454 |
| 0.302069003 | 0.24007698  |
| 5.461685696 | 1.58669169  |
| 0.239955032 | 0.194058775 |
| 0.183066431 | 0.150496302 |
| 0           | 0           |
| 2.388681523 | 1.048031235 |
| 0           | 0           |
| 0           | 5.90210945  |
| 0           | 0           |
| 0.084387373 | 0.07144796  |
| 0           | 0           |
| 0.01997772  | 0.017256022 |
| 0           | 0           |
| 0           | 0.826195079 |
| 0.988869293 | 0           |
| 0           | 0           |
| 7.795342365 | 0           |
| 0           | 0.394653668 |
| 0.011076163 | 1.038920062 |
| 0           | 0.984997882 |
| 0           | 0           |
| 0           | 0.889563233 |
| 0.649480236 | 0           |
| 0.014053385 | 0.012161525 |
| 0.023039433 | 0.019881431 |
| 0           | 0.795590457 |

|             |             |
|-------------|-------------|
| 0.25792141  | 0.20753074  |
| 0           | 0.69497408  |
| 3.945445983 | 0           |
| 0           | 0           |
| 0.027216029 | 0.023454716 |
| 0.098108204 | 0.082718503 |
| 1.478850489 | 0           |
| 0           | 0           |
| 1.60933684  | 0.004842853 |
| 0.048657746 | 0.041653089 |
| 1.227159898 | 0.055441646 |
| 0.038560979 | 0.033113866 |
| 0.086065349 | 5.805148053 |
| 1.623352455 | 0.007642375 |
| 6.460898063 | 0.022588829 |
| 0.075140193 | 0.063799114 |
| 2.339570807 | 0           |
| 1.768763536 | 0.037320646 |
| 0           | 1.134123131 |
| 3.559109128 | 0           |
| 0.063767043 | 0.054332398 |
| 2.379783527 | 2.011943692 |
| 0.038118784 | 0.032738658 |
| 0.039950693 | 0.034292382 |
| 0.150392832 | 1.478835659 |
| 1.068581624 | 0.016545326 |
| 0           | 0           |
| 6.141082151 | 0.571194431 |
| 2.81306884  | 0.000961555 |
| 0.28794675  | 0.229750548 |
| 0.192595497 | 0.157891459 |
| 0           | 0           |
| 0.015472711 | 0.013383777 |
| 0.113394124 | 0.095165548 |
| 1.852884245 | 0           |
| 1.663993644 | 1.06397998  |
| 0.057162657 | 0.048804701 |
| 0           | 0           |
| 0           | 1.399707463 |
| 0           | 0.657963289 |
| 0.83754152  | 0           |
| 0.329686664 | 0.260047213 |
| 6.252960175 | 0           |
| 0.090626157 | 0.076584199 |
| 0.953882876 | 0           |
| 1.975325203 | 0.603471972 |
| 1.272822938 | 0.066800926 |
| 4.242536091 | 0.05767122  |
| 1.648561944 | 0.16270158  |
| 0.102168484 | 1.973198328 |
| 0           | 4.310640925 |
| 0           | 0           |
| 0.110005449 | 0.092416032 |
| 0.210699254 | 0.17183099  |
| 0.105219201 | 0.088523044 |
| 0.100904087 | 0.085003676 |
| 0           | 0           |
| 0.121881965 | 0.102028112 |

Table S4. Survival information of differentially expressed miRNA in test group

| id           | futime      | fustat | hsa-miR-424-5p | hsa-miR-139-3p |
|--------------|-------------|--------|----------------|----------------|
| TCGA-MR-A8JO | 0.904109589 | 0      | 9.064137916    | 6.497324861    |
| TCGA-CC-A8HS | 0.821917808 | 1      | 7.147126964    | 6.827287924    |
| TCGA-G3-AAV3 | 1.128767123 | 0      | 9.045150771    | 6.033869453    |
| TCGA-DD-AAEA | 1.575342466 | 0      | 8.289036872    | 5.975940443    |
| TCGA-DD-A4NS | 6.728767123 | 1      | 9.848814853    | 7.301100551    |
| TCGA-EP-A12J | 1.561643836 | 0      | 8.629181977    | 8.060542544    |
| TCGA-2Y-A9H1 | 3.367123288 | 1      | 8.187519115    | 7.116103245    |
| TCGA-WQ-AB4B | 1.082191781 | 0      | 9.667157064    | 6.155787904    |
| TCGA-DD-AADP | 1.254794521 | 0      | 8.974445515    | 6.798663173    |
| TCGA-DD-AADN | 2.460273973 | 0      | 7.786542       | 3.391590545    |
| TCGA-CC-A7IJ | 1.046575342 | 0      | 9.120299254    | 4.710109523    |
| TCGA-ES-A2HT | 1.2         | 1      | 9.334792601    | 7.620327595    |
| TCGA-DD-AAE3 | 1.550684932 | 0      | 8.201152007    | 8.003645627    |
| TCGA-CC-A7IE | 0.594520548 | 1      | 9.255512632    | 5.430017747    |
| TCGA-FV-A4ZP | 6.810958904 | 1      | 8.218407526    | 4.119406178    |
| TCGA-ED-A7PY | 1.068493151 | 0      | 8.176451468    | 6.572493994    |
| TCGA-CC-A3M9 | 0.821917808 | 1      | 8.613767481    | 6.140028979    |
| TCGA-BC-A110 | 5.797260274 | 1      | 11.17380964    | 8.901262396    |
| TCGA-ZP-A9CY | 2.142465753 | 0      | 9.822335596    | 7.915538224    |
| TCGA-DD-AADR | 5.556164384 | 0      | 7.841393426    | 7.17812948     |
| TCGA-DD-AAE9 | 1.978082192 | 0      | 8.886983744    | 6.303444811    |
| TCGA-CC-A7IL | 0.761643836 | 1      | 8.587013689    | 5.552572682    |
| TCGA-ZS-A9CG | 0.934246575 | 0      | 8.847341187    | 7.486056035    |
| TCGA-2Y-A9H9 | 1.909589041 | 0      | 8.02524942     | 6.994460286    |
| TCGA-ZP-A9CZ | 1.934246575 | 0      | 8.572583864    | 6.498341912    |
| TCGA-DD-A1EB | 5.526027397 | 0      | 9.998017834    | 7.778376915    |
| TCGA-DD-AADB | 3.402739726 | 0      | 7.550607334    | 5.053740835    |
| TCGA-BC-A10S | 3.898630137 | 1      | 9.222130467    | 8.022111411    |
| TCGA-LG-A9QC | 1.164383562 | 0      | 7.727963135    | 7.780288934    |
| TCGA-DD-A73B | 0.775342466 | 1      | 7.938577556    | 5.522837691    |
| TCGA-K7-AAU7 | 0.983561644 | 0      | 9.733967352    | 5.427023598    |
| TCGA-CC-A9FS | 0.578082192 | 0      | 8.361455009    | 7.621564865    |
| TCGA-ED-A82E | 1.117808219 | 0      | 9.258294181    | 4.487142927    |
| TCGA-2Y-A9GW | 3.482191781 | 1      | 9.552810978    | 6.683379779    |
| TCGA-DD-A4NO | 6.150684932 | 0      | 7.822694505    | 5.502138112    |
| TCGA-LG-A6GG | 1.060273973 | 0      | 7.545617953    | 5.762327285    |
| TCGA-XR-A8TE | 2.534246575 | 0      | 8.361924271    | 6.718533317    |
| TCGA-DD-AAE1 | 1.512328767 | 0      | 6.467544596    | 6.989728879    |
| TCGA-DD-AAW1 | 5.449315068 | 0      | 7.47333271     | 7.406150186    |
| TCGA-DD-AACD | 1.043835616 | 1      | 9.035302215    | 6.970741254    |
| TCGA-G3-AAV5 | 0.969863014 | 0      | 7.193885017    | 5.759763803    |
| TCGA-DD-A1EE | 0.956164384 | 1      | 8.890510759    | 7.466134188    |
| TCGA-DD-AADE | 3.293150685 | 0      | 8.326587915    | 7.031167454    |
| TCGA-DD-A4ND | 7.523287671 | 0      | 9.380604517    | 6.177867464    |
| TCGA-ED-A66X | 1.112328767 | 0      | 9.082718437    | 5.622253454    |
| TCGA-BC-A216 | 3.701369863 | 0      | 10.59031189    | 5.548613043    |
| TCGA-CC-A8HT | 0.383561644 | 1      | 7.95212742     | 4.881688717    |
| TCGA-DD-AACJ | 5.75890411  | 0      | 8.888589911    | 5.527816963    |
| TCGA-ZS-A9CF | 6.608219178 | 0      | 8.615863286    | 5.386579258    |
| TCGA-CC-5258 | 0.353424658 | 1      | 8.706408204    | 5.679442789    |
| TCGA-ZP-A9CV | 2.980821918 | 1      | 9.252726176    | 7.432103192    |
| TCGA-WX-AA44 | 1.684931507 | 0      | 8.911497264    | 5.299650815    |
| TCGA-BC-A10U | 2.293150685 | 1      | 8.3912003      | 5.020943859    |
| TCGA-DD-AACT | 4.279452055 | 0      | 9.222610338    | 7.74032655     |
| TCGA-MI-A75H | 2.046575342 | 0      | 7.882833968    | 7.378999232    |
| TCGA-DD-AACB | 6.367123288 | 0      | 7.884869656    | 5.466941715    |

|              |             |   |             |             |
|--------------|-------------|---|-------------|-------------|
| TCGA-G3-A25V | 2.356164384 | 0 | 10.72782317 | 7.202623635 |
| TCGA-DD-A73D | 1.898630137 | 0 | 8.120416479 | 6.00254248  |
| TCGA-DD-AAD5 | 3.684931507 | 0 | 8.49375429  | 5.212821641 |
| TCGA-CC-A123 | 0.6         | 0 | 8.188909333 | 6.206050445 |
| TCGA-2Y-A9H4 | 3.978082192 | 0 | 8.209402752 | 7.350647105 |
| TCGA-BC-A10R | 0.843835616 | 1 | 9.843195753 | 7.234930397 |
| TCGA-G3-A3CH | 2.136986301 | 0 | 8.983562374 | 7.657848722 |
| TCGA-DD-AAEB | 1.309589041 | 0 | 8.109351937 | 8.319996213 |
| TCGA-BC-A112 | 0.419178082 | 1 | 9.055542741 | 6.243295863 |
| TCGA-DD-A39X | 4.64109589  | 1 | 8.902526196 | 6.752713167 |
| TCGA-DD-AAEC | 5.983561644 | 0 | 8.034410353 | 7.731726556 |
| TCGA-DD-A1ED | 6.304109589 | 0 | 10.20024747 | 8.495976299 |
| TCGA-MI-A75I | 1.726027397 | 0 | 8.785476755 | 5.58679888  |
| TCGA-DD-AAD3 | 3.547945205 | 0 | 10.05897643 | 6.544226452 |
| TCGA-G3-A25W | 2.561643836 | 0 | 9.904144032 | 6.424666728 |
| TCGA-DD-AACX | 0.465753425 | 0 | 7.751607406 | 4.597340173 |
| TCGA-DD-A4NP | 9.063013699 | 0 | 9.661592673 | 7.763047681 |
| TCGA-BC-4073 | 2.326027397 | 0 | 8.643774047 | 6.258612439 |
| TCGA-DD-A3A2 | 5.838356164 | 1 | 8.236302732 | 8.217443717 |
| TCGA-DD-A4NN | 2.463013699 | 1 | 8.493053983 | 4.692606369 |
| TCGA-NI-A8LF | 2.189041096 | 0 | 8.327705854 | 7.382639496 |
| TCGA-DD-AADS | 1.298630137 | 0 | 7.721522625 | 7.593158881 |
| TCGA-DD-AAD6 | 1.84109589  | 0 | 7.879993861 | 5.067746063 |
| TCGA-DD-AAE4 | 1.665753425 | 0 | 8.922275663 | 7.054310438 |
| TCGA-DD-AACP | 1.136986301 | 0 | 7.237676521 | 4.926793484 |
| TCGA-DD-AAVR | 6.884931507 | 0 | 9.720152355 | 7.449012835 |
| TCGA-BC-A10T | 2.293150685 | 1 | 10.49799533 | 7.410285036 |
| TCGA-DD-AACU | 4.293150685 | 0 | 9.932810143 | 6.099509828 |
| TCGA-DD-AADA | 3.378082192 | 0 | 8.938117338 | 7.119212011 |
| TCGA-DD-A73A | 1.994520548 | 0 | 7.330608865 | 6.146648275 |
| TCGA-DD-A11C | 1.81369863  | 0 | 8.474475033 | 6.693711259 |
| TCGA-G3-A5SL | 1.701369863 | 0 | 7.89175308  | 6.887642973 |
| TCGA-FV-A2QR | 1.591780822 | 1 | 8.043034744 | 6.090737207 |
| TCGA-DD-A1EA | 6.616438356 | 0 | 8.786255493 | 6.597386689 |
| TCGA-CC-A5UD | 0.832876712 | 1 | 6.268787534 | 3.904837425 |
| TCGA-DD-AAVP | 7.539726027 | 0 | 8.969660235 | 7.754049683 |
| TCGA-UB-AA0V | 0.860273973 | 0 | 10.57969008 | 7.846903616 |
| TCGA-DD-AADK | 2.873972603 | 0 | 8.847194993 | 6.708377163 |
| TCGA-DD-AADY | 1.520547945 | 0 | 8.335326191 | 8.819778841 |
| TCGA-BC-A8YO | 1.539726027 | 0 | 7.645287814 | 4.618299914 |
| TCGA-DD-A1EI | 0.501369863 | 0 | 9.959704728 | 8.178062417 |
| TCGA-G3-AAV0 | 1.304109589 | 0 | 8.678255776 | 8.270157901 |
| TCGA-DD-AADQ | 1.194520548 | 0 | 8.486873737 | 5.470751821 |
| TCGA-K7-A6G5 | 1.402739726 | 0 | 8.564374358 | 6.48442123  |
| TCGA-G3-A25U | 4.482191781 | 0 | 8.829010905 | 7.686538385 |
| TCGA-DD-A39V | 1.761643836 | 1 | 8.937430683 | 6.25412719  |
| TCGA-DD-AADI | 2.97260274  | 0 | 8.743615289 | 6.600748565 |
| TCGA-DD-AAE0 | 1.520547945 | 0 | 9.470677738 | 5.09653262  |
| TCGA-DD-AAEG | 1.969863014 | 0 | 8.966732856 | 6.510948353 |
| TCGA-CC-A7IF | 1.778082192 | 1 | 8.760447655 | 7.091688522 |
| TCGA-DD-AAVW | 6.347945205 | 0 | 10.01361599 | 6.431946294 |
| TCGA-KR-A7K8 | 2.482191781 | 0 | 9.986923315 | 6.308182564 |
| TCGA-EP-A3JL | 0.830136986 | 0 | 8.331708172 | 7.272977126 |
| TCGA-NI-A4U2 | 4.906849315 | 1 | 7.851523193 | 7.156503795 |
| TCGA-FV-A3I0 | 2.323287671 | 0 | 9.067327461 | 3.674199871 |
| TCGA-UB-AA0U | 0.895890411 | 0 | 9.947965104 | 7.743991967 |
| TCGA-DD-AAVV | 6.726027397 | 0 | 9.436488215 | 7.163461854 |
| TCGA-QA-A7B7 | 0.257534247 | 0 | 7.639397645 | 5.279977624 |

|              |             |   |             |             |
|--------------|-------------|---|-------------|-------------|
| TCGA-DD-A3A3 | 1.465753425 | 1 | 7.983114573 | 5.830539179 |
| TCGA-5C-A9VH | 0.882191781 | 0 | 9.293533924 | 5.729886593 |
| TCGA-CC-A7IK | 0.717808219 | 1 | 7.713078363 | 7.180230805 |
| TCGA-G3-A25T | 4.254794521 | 0 | 9.55455877  | 5.863028684 |
| TCGA-2Y-A9H0 | 10.06849315 | 0 | 8.220631379 | 3.529775199 |
| TCGA-DD-AAD2 | 1.802739726 | 0 | 9.785394052 | 6.597029544 |
| TCGA-EP-A26S | 1.665753425 | 0 | 10.2271466  | 7.741870348 |
| TCGA-DD-A1EF | 1.079452055 | 1 | 8.664926399 | 5.892041544 |
| TCGA-XR-A8TF | 1.898630137 | 1 | 7.688050631 | 7.493399457 |
| TCGA-CC-A7IH | 1           | 0 | 7.642066427 | 7.867640585 |
| TCGA-DD-AACV | 4.194520548 | 0 | 8.404407541 | 6.090454053 |
| TCGA-LG-A9QD | 1.002739726 | 0 | 8.746772122 | 8.577423979 |
| TCGA-CC-A3MC | 0.994520548 | 0 | 9.478759291 | 5.206271828 |
| TCGA-DD-A4NV | 6.569863014 | 0 | 8.942985009 | 7.700679591 |
| TCGA-DD-AADF | 0.315068493 | 1 | 8.217041967 | 5.449052438 |
| TCGA-DD-A11A | 0.216438356 | 0 | 9.156883801 | 7.491693594 |
| TCGA-DD-A73C | 1.920547945 | 0 | 7.050346579 | 7.807261415 |
| TCGA-DD-AAE8 | 1.819178082 | 0 | 10.03113977 | 7.122203667 |
| TCGA-HP-A5MZ | 0.249315068 | 1 | 8.671863787 | 5.72666794  |
| TCGA-BC-A5W4 | 1.498630137 | 1 | 7.514172446 | 5.103778806 |
| TCGA-KR-A7K0 | 0.178082192 | 1 | 10.0896129  | 7.434744034 |
| TCGA-DD-AAVZ | 5.205479452 | 0 | 8.019585968 | 6.803657112 |
| TCGA-CC-A7IG | 0.819178082 | 1 | 8.176529    | 4.953704637 |
| TCGA-5C-A9VG | 0.898630137 | 0 | 9.053736931 | 7.004158473 |
| TCGA-DD-A4NF | 2.580821918 | 0 | 7.936535185 | 7.477555885 |
| TCGA-2Y-A9GX | 6.690410959 | 0 | 9.739879081 | 7.035302253 |
| TCGA-DD-A113 | 6.643835616 | 0 | 8.52660247  | 5.446046333 |
| TCGA-2Y-A9GU | 5.312328767 | 0 | 8.123029071 | 6.736631241 |
| TCGA-G3-AAUZ | 1.315068493 | 0 | 8.635290256 | 7.215791248 |
| TCGA-DD-A119 | 0.610958904 | 1 | 9.810898657 | 6.907774701 |
| TCGA-G3-AAV7 | 0.989041096 | 0 | 8.919092591 | 4.311547887 |
| TCGA-DD-AAW2 | 5.082191781 | 0 | 7.711700519 | 7.910873521 |
| TCGA-DD-A39Z | 1.646575342 | 1 | 8.669845898 | 7.449970262 |
| TCGA-DD-AAD0 | 0.375342466 | 0 | 7.328525879 | 4.678035313 |
| TCGA-G3-A3CJ | 1.62739726  | 0 | 8.801371592 | 7.993353637 |
| TCGA-DD-A4NI | 2.235616438 | 0 | 8.393295937 | 7.257777469 |
| TCGA-DD-AADG | 3.136986301 | 0 | 8.131309362 | 8.13694313  |
| TCGA-ZP-A9D4 | 1.082191781 | 0 | 6.895616712 | 7.562573485 |
| TCGA-RC-A7SH | 1.282191781 | 0 | 8.9799111   | 4.828452299 |
| TCGA-DD-A1EG | 3.75890411  | 1 | 9.156802556 | 6.255606752 |
| TCGA-G3-A25S | 1.139726027 | 1 | 8.902922284 | 5.17479923  |
| TCGA-G3-A7M9 | 0.153424658 | 1 | 8.731322988 | 5.915793519 |
| TCGA-WQ-A9G7 | 0.082191781 | 0 | 9.612238224 | 7.079714552 |
| TCGA-MI-A75E | 1.389041096 | 0 | 10.22384201 | 6.796182005 |
| TCGA-WX-AA47 | 1.523287671 | 1 | 7.509977203 | 6.195120375 |
| TCGA-XR-A8TG | 2.460273973 | 0 | 8.130975495 | 5.426278392 |
| TCGA-G3-A7M6 | 1.731506849 | 0 | 9.774123159 | 6.217163038 |
| TCGA-DD-AAEH | 2.147945205 | 0 | 8.390157274 | 7.564086404 |
| TCGA-ED-A7XO | 1.169863014 | 0 | 10.57546288 | 8.042936855 |
| TCGA-BD-A3ER | 3.054794521 | 0 | 9.472834209 | 6.521629126 |
| TCGA-BC-A217 | 3.82739726  | 1 | 9.545444466 | 2.818643558 |
| TCGA-WJ-A86L | 0.945205479 | 0 | 7.746537514 | 2.236148215 |
| TCGA-DD-AAEK | 2.923287671 | 0 | 7.929039262 | 7.313417024 |
| TCGA-2Y-A9H7 | 3.2         | 0 | 7.083794286 | 6.154883567 |
| TCGA-RC-A7SK | 1.293150685 | 0 | 9.300969473 | 6.9840948   |
| TCGA-DD-AACH | 0.534246575 | 1 | 7.665349013 | 6.039313745 |
| TCGA-BC-A10Z | 0.093150685 | 1 | 8.889131769 | 5.850860938 |
| TCGA-BD-A3EP | 1.120547945 | 0 | 9.145352993 | 6.52385908  |

| hsa-miR-1258 | hsa-miR-21-5p | hsa-miR-93-5p | hsa-miR-589-5p | hsa-miR-10b-5p |
|--------------|---------------|---------------|----------------|----------------|
| 0.096921423  | 20.43050627   | 13.61366479   | 7.442181572    | 17.92253364    |
| 4.125013033  | 17.96399545   | 15.44890011   | 7.120853702    | 14.62270436    |
| 1.718409561  | 19.63159735   | 13.89950544   | 7.842899009    | 17.38048744    |
| 4.407637624  | 19.98806561   | 15.51116037   | 9.570119404    | 15.92563812    |
| 3.295866316  | 19.27620054   | 14.42314154   | 7.649150521    | 16.20457808    |
| 0.044278428  | 19.27552744   | 13.39138614   | 8.231268361    | 17.20939501    |
| 1.48632026   | 21.42906184   | 13.77364269   | 8.74552929     | 16.87422265    |
| 0.018988326  | 20.47682455   | 14.25849761   | 8.35561023     | 17.42533695    |
| 0.926985765  | 20.5329713    | 15.29223913   | 8.526563479    | 14.52512069    |
| 0.041683654  | 20.69689169   | 16.03565009   | 7.861734319    | 15.31502558    |
| 3.754372803  | 20.22983222   | 14.76308057   | 8.527280197    | 17.79318662    |
| 0.195411215  | 20.31536672   | 12.98484958   | 7.823874499    | 14.31471454    |
| 1.341245955  | 20.05070728   | 14.73424916   | 7.629466203    | 15.80565347    |
| 0.981733394  | 19.11674376   | 14.75975061   | 8.453949265    | 15.30052551    |
| 0.16639415   | 20.27020041   | 17.87201896   | 9.379901659    | 13.59581546    |
| 0.037423904  | 18.41819352   | 15.46712311   | 10.42869432    | 11.62695285    |
| 0            | 19.85686443   | 13.97503889   | 8.997249669    | 16.37194977    |
| 5.485848901  | 19.3924793    | 12.73280044   | 6.491531155    | 14.67586005    |
| 4.879263236  | 19.9844671    | 13.35073317   | 8.533089971    | 16.38056421    |
| 5.002422669  | 21.11096351   | 14.92334654   | 9.560437697    | 16.90863534    |
| 0.153794371  | 19.80352945   | 15.31040852   | 9.13340164     | 17.50260895    |
| 1.822064125  | 19.53822699   | 14.85542798   | 9.831476918    | 17.25630904    |
| 0.024985425  | 18.68127923   | 13.7972306    | 7.901580671    | 17.53450657    |
| 1.449796781  | 20.54729973   | 14.72825174   | 8.721710871    | 17.19860388    |
| 2.88779437   | 20.29027215   | 14.60402683   | 8.846846729    | 16.2447768     |
| 5.428471523  | 17.64977781   | 12.4465053    | 9.70329705     | 16.08681492    |
| 0            | 20.31546134   | 15.84762575   | 8.379219496    | 14.52745268    |
| 3.270997018  | 19.98698872   | 13.91595564   | 7.726400167    | 18.01783701    |
| 0.075038446  | 18.60358848   | 14.37344692   | 9.701534362    | 16.76983942    |
| 3.64155954   | 19.54938721   | 15.37107122   | 8.932068121    | 16.84528382    |
| 0            | 20.99779618   | 14.46644806   | 7.763119437    | 14.30451629    |
| 0.999699858  | 19.72816797   | 14.75215203   | 9.027416911    | 14.03534013    |
| 0            | 21.06090952   | 14.12498571   | 8.672371506    | 16.03546909    |
| 0.758861369  | 20.73925642   | 14.14623332   | 8.806910375    | 14.29456612    |
| 0.084976358  | 20.59051935   | 14.96415904   | 8.584728514    | 18.01728703    |
| 3.788604707  | 20.45562734   | 15.43309796   | 10.01442952    | 18.90507394    |
| 0.111317737  | 18.83355714   | 14.02622907   | 7.535050446    | 13.63356822    |
| 1.357074396  | 19.15353802   | 15.16214914   | 8.160308661    | 17.18470434    |
| 0.073556953  | 20.48619776   | 14.88882584   | 8.290666175    | 15.17690695    |
| 0.01915044   | 20.47880395   | 14.89189569   | 8.366039407    | 16.55011829    |
| 0.088096228  | 20.3161046    | 15.66463706   | 9.43587939     | 14.95549739    |
| 0.058112628  | 20.16525689   | 14.30756479   | 9.282553412    | 17.38854348    |
| 0.110933275  | 21.06388387   | 14.94235511   | 8.091432103    | 17.53792176    |
| 4.175285757  | 19.55027779   | 14.6246755    | 8.066165359    | 16.09489409    |
| 0            | 20.45684677   | 14.59261811   | 8.462816552    | 12.78242205    |
| 3.973340686  | 17.87408919   | 14.38473703   | 8.173757039    | 16.62345745    |
| 2.600754521  | 19.34800417   | 15.00702797   | 10.59280394    | 16.03440218    |
| 0.166374122  | 22.55795009   | 14.85841269   | 9.375918008    | 17.37276221    |
| 4.73216839   | 19.88947033   | 13.30651705   | 9.090046892    | 15.38543923    |
| 1.818082034  | 18.94334845   | 14.72889055   | 6.858169725    | 15.4579435     |
| 0.002363321  | 20.70724849   | 13.51406484   | 10.44163987    | 14.0016078     |
| 0            | 19.98935932   | 14.74850709   | 7.999340853    | 15.68923146    |
| 1.173074071  | 20.14707949   | 13.83795247   | 8.830814998    | 16.61611628    |
| 3.097714768  | 20.38447524   | 14.63460747   | 9.328222136    | 13.03831831    |
| 1.046856822  | 19.30864536   | 14.83312032   | 9.323535524    | 16.53144449    |
| 0            | 19.63700231   | 13.44258852   | 7.204646441    | 16.34902604    |

|             |             |             |             |             |
|-------------|-------------|-------------|-------------|-------------|
| 4.666348407 | 19.83856113 | 12.93643383 | 7.308628267 | 14.85504564 |
| 0           | 19.34233222 | 14.5260899  | 9.982040944 | 17.79017203 |
| 0           | 21.05198514 | 14.20939952 | 8.37789485  | 12.72806526 |
| 1.840237526 | 19.83361461 | 13.81736858 | 8.955955977 | 15.08731291 |
| 2.740296732 | 19.21219048 | 14.17821686 | 8.09434363  | 17.37248624 |
| 0           | 19.74776026 | 13.01166035 | 8.22196445  | 15.77588654 |
| 0.68171932  | 19.10648176 | 14.46405746 | 8.144506476 | 15.98369619 |
| 1.030086216 | 19.34258523 | 14.74999363 | 8.406228306 | 17.86376095 |
| 0           | 20.90032899 | 14.76660451 | 8.780889656 | 12.86883422 |
| 1.210336057 | 19.29664911 | 13.28482558 | 7.928295442 | 15.30285365 |
| 0.054071017 | 18.8930099  | 14.86729347 | 9.660163591 | 15.9811999  |
| 3.978489689 | 19.03222019 | 13.23684496 | 7.252458168 | 16.51684534 |
| 1.977401523 | 19.46188804 | 14.99084095 | 9.796637898 | 17.02081909 |
| 0.573573692 | 20.1454545  | 14.61923197 | 9.584968125 | 11.54241061 |
| 3.356248226 | 20.16021129 | 13.7487965  | 8.36446747  | 15.86604631 |
| 0.049890108 | 20.58797462 | 14.3738115  | 9.556114321 | 15.90338502 |
| 3.332403547 | 20.2243694  | 15.19096082 | 8.011238649 | 13.1231734  |
| 0.001778216 | 20.58265434 | 13.29461276 | 7.935579699 | 16.53989661 |
| 6.247803342 | 16.13617002 | 13.86410031 | 8.987516549 | 12.38057903 |
| 0.00834252  | 18.8685223  | 16.73578275 | 10.96305854 | 13.82387903 |
| 1.879339581 | 19.67505376 | 13.98768936 | 8.83256226  | 18.06581887 |
| 4.714769821 | 20.48352614 | 14.61723293 | 8.474372469 | 15.93804743 |
| 1.767565951 | 21.50781104 | 15.57360111 | 8.556544443 | 16.10110265 |
| 2.359645503 | 19.90507784 | 14.95784149 | 8.425194268 | 13.85387607 |
| 0           | 20.16151948 | 16.84043739 | 9.125303668 | 16.57192229 |
| 0           | 20.42274201 | 14.01734198 | 8.3839757   | 15.27781203 |
| 2.195077955 | 18.71615095 | 13.2060439  | 8.241382784 | 14.82786239 |
| 1.975997686 | 20.62386266 | 14.72528634 | 10.62812271 | 14.30819579 |
| 1.423566582 | 19.43870321 | 14.80716339 | 9.129164744 | 16.20262876 |
| 4.769605179 | 19.71282937 | 14.3402793  | 8.435560449 | 11.30288971 |
| 4.443451707 | 19.00960274 | 14.46714926 | 8.173658669 | 18.26703726 |
| 0.130433043 | 19.91302578 | 15.8435359  | 9.222841512 | 17.70930276 |
| 0           | 19.92932631 | 13.85151018 | 9.627283453 | 15.12373986 |
| 0           | 19.68461173 | 13.17864099 | 8.798181437 | 16.01162034 |
| 0           | 20.38664545 | 15.89568158 | 10.05055328 | 16.73281381 |
| 0.027697323 | 19.44808965 | 14.81746972 | 8.979282205 | 12.5259064  |
| 5.594144926 | 18.59362826 | 13.42070417 | 7.660173862 | 14.77366661 |
| 0.001317225 | 20.77627486 | 14.06422048 | 8.260650788 | 14.52782678 |
| 2.276473827 | 19.60491458 | 15.33936898 | 10.55700938 | 15.48487284 |
| 4.465783618 | 19.49694808 | 15.26345234 | 9.086484493 | 14.76793292 |
| 2.670154671 | 19.82900034 | 14.28712214 | 8.544255934 | 14.34218498 |
| 6.66245516  | 18.6988991  | 14.23402833 | 8.532272083 | 11.65468132 |
| 0.06177317  | 21.47029164 | 14.78401324 | 8.512226216 | 16.67910368 |
| 1.994718565 | 20.48569587 | 14.84913798 | 8.320675564 | 15.42235798 |
| 0           | 18.67701673 | 14.40835218 | 8.181322323 | 17.64886332 |
| 0           | 20.73929385 | 15.23436189 | 8.874648847 | 18.33573785 |
| 0           | 19.97717703 | 15.20625756 | 9.320837528 | 13.92704392 |
| 1.420489589 | 20.27501007 | 15.26132759 | 8.929851903 | 16.85572021 |
| 1.687475522 | 20.12562022 | 14.15041168 | 8.908485899 | 15.83230584 |
| 0.004260016 | 20.50724633 | 15.06783315 | 11.25878126 | 17.33619828 |
| 0.025139785 | 19.98304514 | 14.02410725 | 8.130628358 | 11.26826556 |
| 2.691855789 | 20.16835286 | 14.0316128  | 9.381881348 | 17.57388068 |
| 2.037447236 | 19.71051768 | 14.42497059 | 9.82707086  | 13.6285371  |
| 4.475376114 | 18.02577406 | 15.02681987 | 8.099731267 | 16.11110012 |
| 0           | 21.14908901 | 13.58224734 | 7.312512853 | 11.19027228 |
| 2.680453529 | 20.6191059  | 14.68692272 | 8.482916854 | 12.93134513 |
| 2.483344392 | 20.68412038 | 14.48730421 | 9.778637604 | 18.53333444 |
| 4.448778672 | 18.04059753 | 15.08101789 | 10.00469378 | 14.04618059 |



|             |             |             |             |             |
|-------------|-------------|-------------|-------------|-------------|
| 0.054868545 | 21.59691399 | 14.93699822 | 8.299543534 | 16.38327801 |
| 1.085352121 | 20.03121691 | 14.03332743 | 9.007574857 | 14.40498284 |
| 0.103007521 | 18.65791768 | 15.22724472 | 10.02645691 | 17.29375374 |
| 0           | 20.0354446  | 14.3935694  | 8.46000676  | 11.09351868 |
| 4.047698825 | 19.29334616 | 14.81622845 | 9.162955685 | 16.06468837 |
| 1.726954994 | 20.76584009 | 14.30848701 | 7.896171688 | 13.16584146 |
| 0.021626853 | 18.23239773 | 13.74828487 | 6.741734873 | 18.93045152 |
| 0           | 18.78576169 | 14.528467   | 8.265210052 | 16.69437956 |
| 0.37426106  | 19.63250014 | 14.75922667 | 9.384908446 | 17.07163129 |
| 0.092589792 | 18.66654135 | 14.24414357 | 8.950767504 | 13.82473333 |
| 0.023370855 | 18.71875661 | 15.62759344 | 9.337409622 | 17.02112356 |
| 2.382905068 | 21.18266481 | 13.78928878 | 8.650477904 | 17.07318367 |
| 0.020487204 | 20.23642879 | 14.38414347 | 8.71731972  | 12.31459098 |
| 3.874079586 | 19.50198278 | 15.29046602 | 8.327229782 | 15.65526371 |
| 0.015626419 | 20.21787302 | 14.14089357 | 9.430650729 | 15.7895732  |
| 2.54434341  | 19.93528955 | 13.64354482 | 9.774073964 | 18.54341393 |
| 6.041990819 | 17.15156681 | 14.6532793  | 9.066527284 | 16.1089925  |
| 0           | 20.36604138 | 14.65632907 | 9.426602378 | 12.93474691 |
| 1.977182454 | 19.93789871 | 14.36227404 | 7.463339719 | 18.22022399 |
| 0.085991743 | 18.29556703 | 16.46177693 | 9.178495852 | 17.47989478 |
| 2.559112503 | 20.20549932 | 14.39782521 | 8.397648217 | 15.69304314 |
| 2.084048605 | 20.23222313 | 14.77524185 | 8.810345818 | 16.01916554 |
| 0.689411725 | 20.1212477  | 14.87208936 | 8.138558451 | 14.71650417 |
| 1.047051737 | 20.46772581 | 14.64777644 | 7.385849517 | 15.73712614 |
| 0.149065306 | 19.0905108  | 15.1524812  | 7.788643903 | 18.09704812 |
| 3.640238999 | 20.35242951 | 13.83391143 | 8.299097019 | 12.25780367 |
| 0.102007671 | 19.80810885 | 14.30850287 | 8.65267879  | 17.2394554  |
| 0.068413712 | 20.26035121 | 15.10233483 | 8.996707025 | 17.63611613 |
| 0.018181257 | 20.47247749 | 14.04321089 | 8.452080562 | 10.22561953 |
| 0.010458722 | 20.20368249 | 13.3588416  | 7.901785496 | 15.19251481 |
| 2.368307611 | 20.02634582 | 14.86038316 | 9.513632256 | 16.53403511 |
| 0           | 18.97616173 | 15.37152828 | 9.030882239 | 16.56193899 |
| 1.54211574  | 19.70090654 | 14.90777298 | 9.708416294 | 16.691035   |
| 0.027128098 | 20.69630247 | 15.14620275 | 9.270247588 | 15.40831283 |
| 0           | 19.65369075 | 14.37749465 | 8.990456723 | 18.37476558 |
| 3.817790427 | 19.54860271 | 15.32110247 | 8.970185682 | 14.14594132 |
| 0.087954606 | 19.79169766 | 15.09044752 | 8.524949012 | 16.93071589 |
| 0.0105163   | 20.55216081 | 14.58913906 | 8.282131642 | 17.03970602 |
| 0.564515387 | 20.08442878 | 14.38207537 | 8.971723597 | 12.77388067 |
| 0           | 20.16973616 | 14.61677303 | 9.293273337 | 14.40323167 |
| 0.030556729 | 20.42846674 | 13.91229731 | 9.654221752 | 16.65316333 |
| 3.376081673 | 19.29237408 | 15.10045805 | 9.079194126 | 16.32941927 |
| 3.685204796 | 19.09542838 | 14.83519365 | 9.267982783 | 13.38264886 |
| 3.645402508 | 20.25965447 | 14.0209597  | 8.597254968 | 13.40140584 |
| 0.08080285  | 20.97675322 | 13.75492955 | 7.643729263 | 14.61682115 |
| 0.045506092 | 20.51546991 | 14.39871526 | 8.936834657 | 15.68298242 |
| 2.022086347 | 19.72832276 | 14.71151696 | 8.082846978 | 15.10583793 |
| 0           | 19.43298261 | 14.88466219 | 8.613609197 | 14.74841264 |
| 4.631530543 | 18.53295919 | 13.88220797 | 8.323313312 | 14.97017165 |
| 3.070057448 | 19.66698613 | 13.99899117 | 8.282545715 | 13.98162688 |
| 0           | 19.06393178 | 13.75984515 | 9.346086378 | 14.94764436 |
| 0.0504706   | 20.08229655 | 14.53444909 | 8.991559121 | 15.39365135 |
| 0.946702209 | 20.37516024 | 14.43006324 | 8.131371025 | 14.39319492 |
| 4.215832512 | 18.9346713  | 15.77098471 | 8.523161477 | 17.09837533 |
| 0           | 19.77233979 | 14.60661943 | 10.2357286  | 11.4377073  |
| 2.533948069 | 21.59071167 | 14.85283811 | 9.423245862 | 15.41191847 |
| 0.036158611 | 19.16278417 | 14.85701992 | 9.328653548 | 17.66686858 |
| 1.342584769 | 19.26943442 | 14.73171449 | 7.767401779 | 16.7952132  |

| hsa-miR-4746-5p | hsa-miR-10b-3p | hsa-miR-500a-3p | hsa-miR-224-5p | hsa-miR-424-3p |
|-----------------|----------------|-----------------|----------------|----------------|
| 3.052933782     | 6.13038245     | 10.14401128     | 8.654145895    | 4.495433669    |
| 4.798239885     | 3.652895186    | 9.611827549     | 9.832184126    | 2.293729249    |
| 3.751396725     | 5.42207708     | 10.12351033     | 9.73642292     | 3.6244511      |
| 4.482486081     | 4.899183505    | 12.15755643     | 9.033960753    | 3.895896078    |
| 3.087486534     | 3.089499508    | 11.17227054     | 7.93724623     | 4.994588998    |
| 3.403776819     | 6.420426224    | 10.08742133     | 9.594270669    | 3.230935387    |
| 1.490936399     | 5.518639033    | 10.03601321     | 7.681409342    | 3.667055257    |
| 2.092069406     | 6.754922556    | 10.23288849     | 9.322030918    | 4.012789126    |
| 4.584294299     | 3.884800268    | 10.3424376      | 9.508333008    | 3.472597491    |
| 5.038155419     | 4.691880108    | 10.22479597     | 10.83469081    | 3.022678805    |
| 4.390723099     | 7.166386884    | 11.20719126     | 7.355256765    | 4.584122401    |
| 2.828248639     | 3.699756725    | 10.08853793     | 6.204290016    | 4.489555084    |
| 2.776594875     | 4.827248787    | 9.886985595     | 10.06968732    | 3.278751685    |
| 4.671741308     | 3.779046093    | 10.94664129     | 9.415114606    | 3.142673687    |
| 4.973296401     | 2.257807753    | 11.62819026     | 10.64322684    | 1.576789026    |
| 4.111802569     | 0.042288058    | 11.64431653     | 5.672984983    | 3.660542391    |
| 4.770275768     | 5.542867602    | 10.60328651     | 9.303624519    | 4.132183376    |
| 2.526407192     | 3.037654295    | 9.595420747     | 7.027440355    | 5.742604267    |
| 0.078256566     | 4.773492486    | 10.21922232     | 10.02168193    | 4.371673551    |
| 4.28945055      | 5.967228149    | 10.42622149     | 6.233245446    | 0.238567251    |
| 4.553181418     | 6.418843935    | 12.28794197     | 12.63892167    | 4.322440414    |
| 3.894186638     | 5.050519118    | 11.01426073     | 10.92862883    | 3.887918375    |
| 2.939098498     | 5.977414503    | 10.17637661     | 11.47913447    | 3.945267222    |
| 3.423076422     | 6.393818395    | 9.664135372     | 8.976957566    | 3.619650966    |
| 4.637814783     | 4.972852703    | 10.91278416     | 8.054883172    | 3.614580531    |
| 3.085095897     | 5.301428833    | 9.464401897     | 5.195835998    | 4.289535044    |
| 4.426497252     | 3.874156152    | 11.11907439     | 8.2965061      | 2.554914484    |
| 2.588753699     | 6.747841756    | 9.879369179     | 9.466730863    | 3.453617108    |
| 3.18313344      | 5.048358623    | 10.758644       | 6.343037049    | 4.090191458    |
| 4.587457261     | 5.901113186    | 11.16663891     | 9.67192723     | 3.510317395    |
| 3.343298334     | 3.340285401    | 9.09034708      | 9.871538809    | 3.105838157    |
| 5.208980969     | 3.458975077    | 11.18995226     | 4.523088767    | 4.391852223    |
| 2.071630697     | 3.436851531    | 10.00277755     | 10.47327202    | 3.513942137    |
| 3.693137467     | 3.074312499    | 10.16552325     | 11.05055069    | 4.643645979    |
| 3.755044829     | 5.154131072    | 12.24860344     | 10.78062441    | 2.72589226     |
| 3.850901988     | 6.509866115    | 11.98581684     | 10.10747866    | 2.510200182    |
| 3.115755732     | 2.049553349    | 10.56236003     | 4.266003387    | 4.257465199    |
| 3.870444931     | 6.402377896    | 11.6453363      | 10.46618779    | 2.529198273    |
| 3.373324289     | 4.716760555    | 10.86228843     | 7.264931458    | 2.675175769    |
| 3.806967468     | 5.944495579    | 10.70044549     | 11.31999465    | 4.277382187    |
| 3.769551424     | 3.443535814    | 10.85188183     | 11.65087929    | 3.241656519    |
| 4.009308502     | 5.907406982    | 11.19143833     | 4.84246555     | 3.298638413    |
| 2.839043907     | 6.36379303     | 10.09103402     | 5.487995142    | 2.049670677    |
| 4.282964843     | 3.600444786    | 12.00620798     | 10.32658919    | 4.928489153    |
| 3.485145063     | 2.231558825    | 11.55141351     | 7.593556002    | 4.421464719    |
| 5.71104902      | 5.604523264    | 10.13286723     | 9.805075944    | 4.051082208    |
| 6.540161543     | 4.283326334    | 11.71860662     | 5.474217243    | 2.620491373    |
| 4.496552203     | 7.000672057    | 10.25709421     | 9.873111257    | 2.716784985    |
| 3.29597857      | 3.968431309    | 9.806671032     | 7.614772589    | 3.294292311    |
| 3.246521492     | 3.949751322    | 11.27672162     | 9.461334876    | 3.247063632    |
| 3.598332432     | 2.334095468    | 10.60585882     | 10.67432953    | 4.335529523    |
| 3.935423034     | 5.563163975    | 10.79538494     | 9.4198829      | 2.763287354    |
| 3.420613472     | 5.436535491    | 10.30759027     | 10.73526613    | 3.051903938    |
| 3.689169715     | 2.09090311     | 10.83099335     | 11.01997465    | 4.353655829    |
| 3.068568201     | 4.880915828    | 10.85294982     | 5.203374126    | 3.068396292    |
| 4.938314357     | 5.738786717    | 10.46115493     | 8.200045369    | 3.218330549    |

|             |             |             |             |             |
|-------------|-------------|-------------|-------------|-------------|
| 3.388399245 | 4.187568419 | 9.610836111 | 8.838211836 | 5.008983659 |
| 3.372409386 | 6.418175159 | 11.30011958 | 9.653965543 | 3.593532627 |
| 4.6240235   | 2.977898383 | 9.651285734 | 8.504770061 | 3.102199727 |
| 5.83138505  | 3.682932039 | 11.8844072  | 7.527140581 | 1.168014812 |
| 2.477805326 | 6.245020258 | 9.371620159 | 10.38642941 | 3.627990108 |
| 2.085769795 | 5.081470095 | 9.671884653 | 10.12388217 | 5.371583046 |
| 3.28152753  | 4.908180706 | 10.35051158 | 4.874612023 | 4.848981919 |
| 2.363451179 | 7.507587071 | 9.894246473 | 10.18574475 | 3.85304718  |
| 4.766492363 | 3.130961669 | 10.31061182 | 4.602652524 | 3.545451037 |
| 3.300155609 | 4.221276697 | 9.717245975 | 5.93965922  | 3.471803027 |
| 2.586754741 | 4.998978207 | 10.8809895  | 8.113935379 | 2.253898851 |
| 2.301765131 | 4.883766607 | 9.268567969 | 7.499876802 | 3.785097412 |
| 3.433157203 | 5.616050169 | 11.74107502 | 10.34344026 | 3.780814643 |
| 3.080444813 | 1.051884131 | 10.67590737 | 9.934926262 | 5.597845493 |
| 5.097963385 | 5.057168139 | 9.98778454  | 4.931654473 | 3.699261244 |
| 5.444328512 | 5.135399901 | 10.72686082 | 4.52228152  | 2.566832542 |
| 3.603656947 | 0.203519053 | 11.30426238 | 6.356076232 | 4.272794057 |
| 5.295822549 | 4.53399474  | 9.502643485 | 9.651034769 | 3.469414066 |
| 2.721773313 | 2.724270357 | 9.757411873 | 4.910133036 | 3.546666954 |
| 5.092737422 | 2.364617235 | 13.46582258 | 11.13831852 | 3.954060357 |
| 2.619072613 | 7.072500742 | 9.75673464  | 6.05082121  | 4.336063838 |
| 2.876979349 | 6.076616607 | 9.628625122 | 9.798972738 | 3.393593285 |
| 4.360653319 | 6.4087236   | 10.39173449 | 8.176564058 | 2.546953271 |
| 4.508120327 | 3.407163395 | 10.41180079 | 8.661632754 | 3.206137806 |
| 5.49817538  | 6.307626714 | 11.76414399 | 5.466538333 | 2.891754568 |
| 2.372389022 | 4.568973918 | 10.34291989 | 9.01650424  | 5.08551425  |
| 3.024616693 | 4.03727376  | 9.411717498 | 10.21340017 | 4.551421248 |
| 3.142433514 | 3.778869313 | 11.66163053 | 10.1285125  | 5.015539758 |
| 2.800593598 | 5.104925912 | 10.9861995  | 10.31623069 | 3.791197046 |
| 2.284657193 | 1.217927411 | 10.47149764 | 10.609052   | 2.888310453 |
| 4.075414018 | 6.912879772 | 9.93963606  | 4.942707333 | 2.832235987 |
| 3.958692775 | 5.879036705 | 12.03799851 | 11.72762476 | 2.91889907  |
| 3.461845266 | 4.763025609 | 10.83814063 | 10.4482838  | 3.463231649 |
| 4.566364227 | 5.511664567 | 10.30545315 | 3.484234897 | 1.646468692 |
| 5.685160259 | 5.079860026 | 11.2285329  | 10.19742112 | 0           |
| 2.727918345 | 2.132840682 | 10.29307388 | 6.604222072 | 4.15315202  |
| 1.544708963 | 1.95633043  | 9.708988386 | 7.611266329 | 4.992401854 |
| 1.590935645 | 3.914494107 | 9.655457325 | 9.640992861 | 4.255508048 |
| 4.971179299 | 4.722524029 | 10.9665497  | 10.07967522 | 3.637339181 |
| 4.671004814 | 3.815183993 | 10.80478035 | 12.43349163 | 3.625508515 |
| 2.260023456 | 2.661948025 | 11.29024029 | 5.152530746 | 4.099977494 |
| 3.269896    | 0.966098369 | 9.934997311 | 9.961684319 | 4.116464994 |
| 4.653703881 | 6.296251238 | 10.00791966 | 9.298993317 | 3.909341811 |
| 2.752859094 | 4.124835721 | 11.0824182  | 12.06773047 | 3.578634586 |
| 4.892546912 | 5.887742527 | 9.727619572 | 10.16083941 | 4.159239042 |
| 2.463696658 | 7.726255923 | 10.23223799 | 9.675899456 | 3.868672404 |
| 3.779228982 | 2.789657005 | 11.3348953  | 9.369801143 | 4.300792272 |
| 4.314886865 | 6.476886442 | 9.802909545 | 9.710590804 | 4.474768464 |
| 3.295657294 | 4.833584716 | 9.987345088 | 9.396833692 | 3.828619064 |
| 3.345687667 | 6.069747833 | 10.19944911 | 9.614475379 | 4.024278144 |
| 3.458644597 | 1.091395152 | 10.43569577 | 9.075623829 | 4.948716013 |
| 4.305653848 | 6.41964505  | 10.40008866 | 8.807095742 | 3.987235625 |
| 3.294427207 | 2.421214128 | 10.73821289 | 10.43970968 | 3.295822032 |
| 2.784004768 | 3.489345261 | 10.78288889 | 10.80971711 | 3.813240173 |
| 1.731467795 | 1.074677005 | 9.319727946 | 10.15661001 | 2.725429711 |
| 3.359250778 | 0.790501187 | 9.608268712 | 8.498405681 | 5.347007278 |
| 4.978363239 | 7.907131067 | 10.63898039 | 6.328577356 | 4.384245434 |
| 5.583605632 | 3.184616631 | 10.88307035 | 6.496001108 | 2.455722944 |

|             |             |             |             |             |
|-------------|-------------|-------------|-------------|-------------|
| 4.821543936 | 6.51603913  | 9.677752774 | 11.24300209 | 3.45541723  |
| 2.364256836 | 2.921050558 | 10.5089718  | 9.22922238  | 4.515942064 |
| 5.743289667 | 5.348104963 | 10.64408699 | 9.282689741 | 2.018714381 |
| 3.966363323 | 0.472883321 | 8.905262578 | 9.132615488 | 3.665537005 |
| 5.732033377 | 5.132912855 | 12.0039502  | 9.153166858 | 3.35344925  |
| 3.9856584   | 2.977614745 | 10.29131678 | 8.840179629 | 4.824353541 |
| 3.116005348 | 7.345373553 | 9.257076585 | 6.29658858  | 3.819915894 |
| 5.431123649 | 5.530285186 | 10.1374948  | 4.716011179 | 3.199740275 |
| 4.525238719 | 3.819386898 | 11.31912967 | 5.862607627 | 3.433569514 |
| 3.790299406 | 1.326878302 | 10.55703598 | 11.42104653 | 3.928110611 |
| 5.525423736 | 6.562100621 | 10.90691017 | 10.58183658 | 3.448875028 |
| 1.307122229 | 5.953946042 | 9.971174587 | 7.578111977 | 3.231844516 |
| 3.433956742 | 0.023036968 | 10.30866318 | 9.728589079 | 3.921074725 |
| 0.233389126 | 3.938431908 | 10.63939165 | 9.029150173 | 3.488522459 |
| 4.844266378 | 5.763812851 | 10.62548072 | 7.616373425 | 3.545632677 |
| 3.415192908 | 6.975246298 | 9.848606666 | 5.785779893 | 3.415325425 |
| 4.192894573 | 4.088528653 | 9.682508571 | 5.530544254 | 2.33967328  |
| 2.232250009 | 2.852880172 | 10.87349791 | 9.297691869 | 4.97475457  |
| 2.974146248 | 5.586640589 | 11.95721659 | 10.91682892 | 3.432983047 |
| 4.144080526 | 4.916276718 | 12.82534081 | 12.46150008 | 1.95122421  |
| 2.920935738 | 3.633263574 | 10.86502711 | 8.418311257 | 3.800257339 |
| 3.830167781 | 6.286752626 | 10.59627858 | 10.34442369 | 3.369450402 |
| 4.379093782 | 3.996218544 | 10.7066257  | 9.486109388 | 2.328775899 |
| 3.08186158  | 5.401239886 | 9.75111428  | 8.004613841 | 4.418747945 |
| 3.50646076  | 5.270236321 | 11.92618641 | 7.843327703 | 2.194680777 |
| 3.288364179 | 1.450310048 | 10.16699756 | 7.331339156 | 5.143989674 |
| 3.677935888 | 5.537238853 | 9.929667876 | 4.105232741 | 3.303736401 |
| 4.059990175 | 5.659735832 | 10.43917167 | 11.2459195  | 4.94897815  |
| 3.559752123 | 1.665809382 | 9.58164523  | 9.265248117 | 3.908568562 |
| 2.863408098 | 3.380101489 | 11.00380844 | 9.480566279 | 3.866155529 |
| 5.385477117 | 5.404065781 | 11.49993604 | 10.69212605 | 3.837233906 |
| 4.042596746 | 5.822277889 | 11.34608152 | 8.727065503 | 2.879392594 |
| 2.755611467 | 5.873564423 | 10.66208157 | 10.457552   | 3.530950288 |
| 4.737480387 | 5.477800959 | 9.817454382 | 10.00941645 | 2.130484034 |
| 2.968634294 | 7.896425806 | 10.33050502 | 10.05009433 | 5.136605742 |
| 2.470936861 | 2.470670473 | 11.65324836 | 10.84581698 | 3.686177526 |
| 4.153292996 | 6.379989716 | 10.62875449 | 9.191872962 | 2.40152188  |
| 3.866702074 | 6.084422668 | 9.40513394  | 6.039660874 | 2.863594416 |
| 2.959977463 | 2.728654376 | 10.79114964 | 7.52637076  | 3.416023496 |
| 3.185024905 | 4.000426736 | 10.40207544 | 9.890859547 | 4.006526432 |
| 5.457699674 | 5.496753863 | 10.85109368 | 11.01783432 | 2.741899691 |
| 5.595655109 | 6.239747572 | 10.20333936 | 8.781227443 | 5.468730673 |
| 2.677219607 | 2.340928599 | 11.11274322 | 8.533922349 | 4.293029758 |
| 2.27132506  | 1.746388272 | 9.885754033 | 10.09913208 | 5.142746316 |
| 4.002584999 | 4.515634471 | 9.206938229 | 6.372002539 | 1.289886908 |
| 4.709076933 | 5.008836201 | 9.832923823 | 9.99415992  | 3.701708685 |
| 3.485068291 | 3.025070856 | 10.41241272 | 9.876241284 | 4.274103225 |
| 4.427287252 | 4.300741539 | 11.09852988 | 9.120819395 | 2.661591325 |
| 2.926767502 | 3.047315427 | 10.60335222 | 8.081316234 | 4.031209833 |
| 2.776286211 | 4.104244329 | 9.968261032 | 9.062303902 | 4.972489718 |
| 6.207068535 | 3.918560141 | 10.26186607 | 8.690601437 | 2.913550379 |
| 4.443762514 | 4.923404634 | 10.6412131  | 8.658319232 | 2.23773443  |
| 3.916859392 | 4.374594596 | 9.928836971 | 9.128829057 | 3.503278606 |
| 3.873595537 | 6.440923295 | 11.65510819 | 11.82654473 | 2.775966798 |
| 2.840838739 | 0.895785462 | 10.32588868 | 8.894687633 | 5.11532129  |
| 4.012255242 | 5.427784684 | 10.06424433 | 11.19731399 | 2.835468229 |
| 5.411783511 | 6.160587888 | 10.98968914 | 8.677254305 | 3.190278372 |
| 3.013966034 | 5.953694022 | 10.65827466 | 8.885138169 | 4.433012947 |

| hsa-miR-7706 | hsa-miR-490-3p | hsa-miR-183-5p | hsa-miR-532-5p | hsa-miR-452-5p |
|--------------|----------------|----------------|----------------|----------------|
| 3.049677087  | 0.088858719    | 12.19130953    | 11.86133216    | 9.150927833    |
| 2.897126776  | 0.058109926    | 12.25185983    | 11.63840271    | 10.16187986    |
| 3.332102063  | 0.028228082    | 11.58966725    | 11.31128822    | 10.07589659    |
| 4.481538503  | 0.014732945    | 10.06887463    | 13.76937562    | 9.90501675     |
| 2.025159757  | 6.002819818    | 12.29764921    | 11.92994926    | 8.206425141    |
| 3.694337257  | 0.040944359    | 12.28673905    | 12.90305873    | 11.43637319    |
| 2.613919677  | 0.127811887    | 11.81062158    | 12.84201103    | 8.81122131     |
| 3.563278231  | 1.667210738    | 13.34604071    | 12.54316523    | 9.751054596    |
| 3.588039389  | 2.705929194    | 13.4273087     | 12.51706613    | 10.89780085    |
| 5.720768623  | 0.038561406    | 14.73696107    | 12.7498006     | 11.31188592    |
| 2.884389479  | 1.424234274    | 13.88328311    | 12.6785658     | 9.06575409     |
| 3.881762865  | 2.310951241    | 12.87886071    | 13.19837551    | 7.112807808    |
| 3.474237425  | 0.088359684    | 14.9213555     | 11.94688562    | 10.95347285    |
| 3.431892648  | 0              | 10.19769851    | 12.34917546    | 11.23920497    |
| 4.485816406  | 0.150871991    | 15.37576634    | 12.02985175    | 11.03192643    |
| 4.452224596  | 0.034644998    | 13.32559601    | 13.49493527    | 6.859412318    |
| 3.757867425  | 0              | 11.82848421    | 12.01445668    | 9.539762339    |
| 1.318279533  | 4.847722814    | 12.13421606    | 11.41183898    | 9.252790274    |
| 2.661320095  | 3.330667848    | 14.04806454    | 11.92537371    | 10.6785398     |
| 3.510221237  | 0.19077718     | 15.09045121    | 13.10941292    | 7.201262076    |
| 3.518819035  | 0.139725232    | 7.752814481    | 14.6819607     | 12.88027389    |
| 2.546911939  | 0.223276023    | 8.054993024    | 12.29967819    | 10.78151896    |
| 2.938360232  | 0.023177657    | 10.34309297    | 12.06677649    | 11.60501832    |
| 3.94606516   | 0.117775098    | 13.25835889    | 11.9602913     | 10.27467377    |
| 2.906334979  | 2.528716318    | 11.11935511    | 13.20586015    | 9.073260353    |
| 3.200380771  | 0              | 9.699505717    | 11.33263792    | 8.014186261    |
| 4.552293799  | 0              | 12.17648856    | 13.40637997    | 9.30539917     |
| 3.084067661  | 0.050312716    | 14.10023204    | 12.06462251    | 10.21191661    |
| 2.952233454  | 0.069040346    | 8.51906347     | 13.16516719    | 8.590804271    |
| 3.356155156  | 0.032567527    | 10.70927982    | 13.78444602    | 10.30637933    |
| 2.7110991    | 0              | 14.30938798    | 10.99544168    | 10.00806001    |
| 2.806920505  | 2.321532625    | 13.88186653    | 13.77727908    | 6.918376344    |
| 3.368361271  | 0              | 16.10994644    | 11.52090116    | 10.41775786    |
| 2.942611006  | 0              | 15.49793796    | 12.55772838    | 10.59783069    |
| 4.608204132  | 2.69912502     | 12.40504276    | 13.07219513    | 9.613651405    |
| 3.323509357  | 0.213079379    | 14.0001822     | 11.79841702    | 11.30855661    |
| 3.714041634  | 2.467468198    | 9.914632104    | 12.10122742    | 5.628365523    |
| 3.513397566  | 0              | 15.28707077    | 14.17396742    | 10.0349528     |
| 5.141846562  | 0.067693576    | 11.35894093    | 13.66054001    | 7.720453876    |
| 3.806042915  | 1.069755151    | 11.98092503    | 13.48815272    | 11.73840955    |
| 5.040163008  | 0.080882915    | 7.660214505    | 13.0872867     | 11.5423149     |
| 4.307996052  | 0.053615191    | 13.11825639    | 12.95073765    | 6.7858422      |
| 4.007490467  | 0.101475876    | 13.16611929    | 12.65025553    | 7.790911751    |
| 4.867480255  | 4.063246379    | 13.15224111    | 12.06127997    | 9.896722103    |
| 4.653011879  | 0              | 13.16214444    | 12.68816152    | 7.43232566     |
| 2.21608241   | 0              | 14.21539254    | 11.72325697    | 11.20799175    |
| 3.237703256  | 0.128849884    | 14.04139909    | 12.7564658     | 6.185245504    |
| 3.94372295   | 0.150854308    | 10.98802634    | 13.81112723    | 10.27387351    |
| 1.355677584  | 0.091518221    | 9.154259472    | 12.09300015    | 8.88813336     |
| 4.638530189  | 0              | 9.576906422    | 12.2501603     | 10.48028186    |
| 3.182946992  | 4.099905961    | 14.24488964    | 12.62997209    | 11.55009899    |
| 2.618168133  | 0              | 11.78780646    | 13.21415514    | 10.1996515     |
| 3.051000566  | 0.044029127    | 15.98724872    | 12.02990157    | 12.236837      |
| 3.100565278  | 4.418645911    | 12.73484493    | 13.76975161    | 10.5679425     |
| 1.641848448  | 0.011759881    | 7.183828454    | 13.18637074    | 7.493261168    |
| 4.20858452   | 0              | 11.37000875    | 13.3984332     | 9.534075911    |

|             |             |             |             |             |
|-------------|-------------|-------------|-------------|-------------|
| 2.3463501   | 2.187290267 | 9.272169417 | 11.58118818 | 9.73332015  |
| 3.954742121 | 0           | 6.445473396 | 13.87726291 | 11.53191096 |
| 3.754918311 | 0           | 14.13082345 | 12.08497027 | 9.705186531 |
| 2.638490604 | 0           | 11.11029824 | 12.74098455 | 10.18877512 |
| 3.753485095 | 0.028853437 | 15.39883188 | 11.98166513 | 10.3555583  |
| 2.341765124 | 0           | 14.21911016 | 12.36696829 | 11.32906092 |
| 2.944931466 | 3.313175159 | 10.99011441 | 12.6677161  | 6.831272365 |
| 2.627499759 | 0.007537201 | 9.430283939 | 12.8303555  | 10.52247058 |
| 1.965624988 | 0           | 15.93862741 | 12.24082281 | 6.40076268  |
| 3.763465712 | 1.206889643 | 11.85989887 | 12.59102223 | 6.850691    |
| 4.094010952 | 0.049919362 | 7.019635358 | 13.46986638 | 10.21414386 |
| 2.786282507 | 2.565346022 | 11.14301618 | 11.28797299 | 9.273163265 |
| 3.144198957 | 0.982880931 | 13.59002772 | 13.41030509 | 11.11312374 |
| 0           | 4.583147567 | 8.584232865 | 13.20665692 | 11.02273719 |
| 2.705210932 | 0           | 13.29487068 | 11.82987823 | 6.896346555 |
| 4.073140995 | 0.046091029 | 7.190279389 | 13.73088055 | 5.89572539  |
| 0.190256228 | 3.024560973 | 10.56823099 | 11.78872188 | 6.620916017 |
| 3.469372551 | 0.001655925 | 13.27817281 | 10.48551604 | 10.15672558 |
| 4.256145392 | 4.442646574 | 11.31597188 | 12.03863872 | 6.316372024 |
| 6.156521004 | 0.007760303 | 13.83873879 | 13.63118767 | 10.0544066  |
| 0.300672471 | 0.240119677 | 10.07259324 | 11.98482626 | 7.889667414 |
| 3.979736933 | 0.01211035  | 13.86789226 | 12.20044638 | 10.19553857 |
| 3.312288806 | 0           | 10.93191324 | 13.12339357 | 10.28558714 |
| 2.703999497 | 1.281405378 | 8.492158981 | 12.68208454 | 8.777951027 |
| 5.408441149 | 0.928110752 | 13.21089725 | 13.48781699 | 6.465516513 |
| 2.116252756 | 0.85557554  | 13.51884546 | 12.48456559 | 10.70402555 |
| 1.769341207 | 3.907755988 | 14.7396147  | 11.59406329 | 11.15633276 |
| 4.495056989 | 3.296159092 | 14.92502765 | 13.00467857 | 11.42316129 |
| 2.393286224 | 2.980377601 | 16.47416398 | 13.17181875 | 11.42946998 |
| 2.617058938 | 0.056176859 | 13.94420541 | 12.29240166 | 11.40288759 |
| 1.675523505 | 0.177890453 | 14.69225932 | 11.41521927 | 6.172418531 |
| 3.796141659 | 0.118941539 | 10.53956178 | 13.48494574 | 11.31951604 |
| 2.656698597 | 0           | 15.29557089 | 13.32330642 | 11.04877389 |
| 2.913215985 | 0           | 12.17319621 | 12.89062981 | 6.013556422 |
| 4.386960278 | 0           | 11.73253717 | 13.53730648 | 9.720375119 |
| 4.677279148 | 0.025681827 | 8.575886763 | 12.76969228 | 8.007606179 |
| 2.537823683 | 5.122483732 | 11.18951331 | 11.65180408 | 8.743482114 |
| 2.328708652 | 0.001226732 | 12.67289726 | 12.8576061  | 9.575954218 |
| 4.569494351 | 3.092043982 | 13.63135235 | 13.27926812 | 10.72864355 |
| 3.280787083 | 0           | 16.2797068  | 12.27277443 | 13.28549979 |
| 4.284843517 | 0.78180324  | 12.26917034 | 12.12330985 | 7.200799398 |
| 3.647935016 | 2.952185263 | 14.23438856 | 12.14311332 | 11.1177619  |
| 2.287607937 | 0.056958363 | 14.21055305 | 12.21040777 | 10.4938984  |
| 4.464336571 | 0.274521656 | 10.76095433 | 12.57378001 | 10.93231513 |
| 3.677726592 | 1.810467935 | 11.78824961 | 12.49509212 | 12.07081451 |
| 3.456011042 | 0           | 8.399842768 | 12.90409876 | 10.15049285 |
| 3.867859549 | 1.819237131 | 14.8694845  | 14.02801483 | 9.391861866 |
| 3.610869326 | 2.463162196 | 13.32353239 | 12.26396941 | 9.626623498 |
| 3.712024833 | 0.021572992 | 13.10141756 | 13.41933038 | 9.465784531 |
| 3.930987551 | 1.015668189 | 9.872825699 | 13.20864689 | 9.908410268 |
| 2.448102999 | 1.091218103 | 12.63086686 | 12.81738576 | 9.987151214 |
| 2.028188028 | 0           | 8.87120791  | 12.00594016 | 10.60179995 |
| 2.862900557 | 0           | 10.91603428 | 13.67243134 | 10.8200818  |
| 3.284160512 | 0.08990397  | 14.12485812 | 11.33325308 | 11.30372517 |
| 2.727479278 | 0.360150231 | 15.38817583 | 12.39860391 | 10.37705629 |
| 3.123944247 | 4.583028347 | 9.916884569 | 12.35276369 | 9.787389466 |
| 3.611742505 | 4.1153148   | 8.865350366 | 13.38457001 | 7.412873159 |
| 4.716243931 | 0           | 12.64518537 | 13.09027203 | 7.390749728 |

|             |             |             |             |             |
|-------------|-------------|-------------|-------------|-------------|
| 3.454108332 | 0.050649043 | 11.4746854  | 13.28002676 | 11.13653263 |
| 3.413171099 | 0           | 15.50879195 | 12.81688238 | 9.75691513  |
| 4.216821667 | 0.094345951 | 8.729332756 | 12.2279767  | 10.84298865 |
| 3.92620475  | 2.29221768  | 16.38575071 | 10.99790914 | 10.19317029 |
| 3.52473198  | 0.06409435  | 13.92854847 | 14.46412295 | 9.785120273 |
| 3.170887621 | 2.475060616 | 10.450282   | 12.79028931 | 9.028381722 |
| 2.430867317 | 0.020073239 | 13.98961933 | 11.60365852 | 8.9669589   |
| 2.408642946 | 0           | 14.63698181 | 11.8738528  | 7.046551717 |
| 0.425825306 | 0.328791872 | 14.41999707 | 12.35846908 | 6.921150987 |
| 2.420109029 | 2.396125691 | 7.64194644  | 13.31592175 | 12.51298717 |
| 3.448328497 | 1.685753783 | 10.4665651  | 13.08978315 | 11.77225989 |
| 3.001194202 | 0.078920037 | 13.21466055 | 12.04908945 | 8.797249998 |
| 1.676502756 | 1.673570736 | 10.1967891  | 12.87187491 | 10.0885188  |
| 3.483141503 | 4.000675441 | 9.964982643 | 12.0023728  | 9.012483445 |
| 2.401138266 | 0.014518289 | 11.70556374 | 13.47970421 | 8.064452706 |
| 2.543465971 | 0           | 15.03916042 | 11.80243173 | 8.596181841 |
| 3.173503515 | 0.067676713 | 12.09119041 | 11.69906382 | 7.462422734 |
| 3.697508039 | 5.265334704 | 7.904814065 | 13.08335602 | 11.04204671 |
| 3.143949361 | 0           | 13.73187886 | 12.95987561 | 9.309021652 |
| 4.612949066 | 0.078977644 | 18.17848223 | 13.3094559  | 10.55120889 |
| 1.45891702  | 3.56952956  | 9.970274102 | 12.29041961 | 8.878895601 |
| 5.551929516 | 0.542429874 | 11.40573797 | 14.13224983 | 10.44349014 |
| 2.677707054 | 0           | 13.11480915 | 13.43318168 | 10.1883586  |
| 3.902404545 | 1.947449433 | 14.74992813 | 12.1564343  | 8.647707902 |
| 4.297728256 | 0.135530225 | 9.496641354 | 12.82157801 | 7.104084248 |
| 2.424941422 | 2.172876585 | 10.87694887 | 12.19125959 | 8.809478176 |
| 3.499255955 | 0.093445217 | 15.0925054  | 12.05403082 | 6.325769322 |
| 5.06231785  | 0.06301304  | 17.26197382 | 12.49060401 | 11.23276081 |
| 3.80082203  | 4.951776117 | 13.15737965 | 12.32750415 | 10.12058818 |
| 3.965564023 | 3.223264876 | 12.44621606 | 12.55613633 | 10.74399052 |
| 3.114431556 | 0           | 15.55074803 | 13.30826795 | 11.6757054  |
| 3.575904595 | 0           | 10.04947311 | 14.31135169 | 9.682854013 |
| 2.947777379 | 0           | 16.08287769 | 13.17947095 | 11.41147631 |
| 2.724403603 | 0.02515639  | 9.465263464 | 13.48397362 | 10.83083126 |
| 3.290164755 | 0.979042152 | 7.829560765 | 12.93410515 | 10.59098483 |
| 3.081849925 | 1.360396953 | 10.38184899 | 12.14455445 | 10.17256657 |
| 3.609854046 | 1.941960957 | 8.546742082 | 13.13710614 | 10.29843584 |
| 5.189368353 | 0.009778842 | 11.32344382 | 12.25417964 | 8.282145011 |
| 2.296531301 | 0           | 14.8636945  | 13.25677212 | 8.132775242 |
| 3.285181502 | 0.630348405 | 11.23988936 | 13.10827005 | 10.53770484 |
| 3.62419428  | 0.028319784 | 9.118072655 | 12.78375405 | 12.55697782 |
| 4.298757384 | 0           | 13.96160462 | 11.69742121 | 10.97015881 |
| 0.079860624 | 2.322119703 | 15.87553432 | 12.4533936  | 9.577702482 |
| 1.240083949 | 3.549368866 | 11.31194857 | 11.90458175 | 10.37560036 |
| 5.005883965 | 1.283122394 | 14.04756236 | 12.13377054 | 7.289023798 |
| 2.21493049  | 0.0420711   | 13.80563808 | 12.1363451  | 10.27383176 |
| 2.022426376 | 2.021530965 | 13.15095676 | 11.71763759 | 9.75893877  |
| 2.183516718 | 3.442516094 | 8.074056197 | 13.48547337 | 10.85139296 |
| 2.301818181 | 5.891086204 | 11.25756271 | 11.7069     | 8.711392074 |
| 2.212173975 | 0           | 13.09713002 | 12.49375744 | 9.41137888  |
| 4.581588813 | 0           | 15.02795645 | 12.16047582 | 9.971687639 |
| 2.237324238 | 0.046622879 | 14.21739008 | 12.84877155 | 9.176559389 |
| 4.309172242 | 0           | 9.791618033 | 12.64604629 | 9.77622591  |
| 3.667634738 | 0           | 16.28977407 | 13.28940763 | 12.31035811 |
| 3.29686367  | 3.431894122 | 14.34326969 | 12.01712343 | 9.539089965 |
| 3.499489269 | 1.21091636  | 13.23387388 | 13.0544039  | 12.32372388 |
| 1.132542523 | 0.033480635 | 14.20944703 | 11.59695891 | 9.794828293 |
| 2.69981915  | 0           | 12.4706482  | 12.64697766 | 9.633461682 |

| hsa-miR-96-5p | hsa-miR-501-3p | hsa-miR-103a-3p | hsa-miR-182-5p | hsa-miR-139-5p |
|---------------|----------------|-----------------|----------------|----------------|
| 4.083244931   | 8.160706112    | 16.76133639     | 13.81129959    | 9.004754954    |
| 3.920025474   | 7.147054743    | 17.11512082     | 13.18709679    | 9.221478059    |
| 4.419476488   | 7.296198248    | 16.66181189     | 14.09323316    | 8.552828052    |
| 2.66777489    | 10.07591515    | 17.13434816     | 11.66862753    | 8.557841978    |
| 4.793351529   | 8.376120767    | 16.97114395     | 14.41593982    | 10.15410153    |
| 3.698156916   | 7.904796176    | 16.6680301      | 14.51307096    | 8.835411383    |
| 5.296505797   | 7.168497008    | 16.57010973     | 13.71503353    | 8.816324558    |
| 5.838880347   | 7.913214267    | 16.83524271     | 14.73917668    | 8.802503202    |
| 5.834795541   | 7.64086606     | 17.34343388     | 14.51835371    | 9.448862098    |
| 5.235075035   | 8.794503676    | 18.20860128     | 15.12634008    | 5.760457621    |
| 5.797384554   | 8.534404606    | 17.40287314     | 15.29099142    | 6.398763277    |
| 5.109555256   | 7.977094103    | 15.89205962     | 14.49730551    | 9.605355591    |
| 7.460346118   | 6.785834832    | 17.60542221     | 16.51058128    | 10.76827127    |
| 1.975940083   | 8.767797782    | 16.7729079      | 10.85118965    | 6.840620896    |
| 6.534010416   | 9.319740044    | 16.95790898     | 16.92423793    | 5.961826563    |
| 4.378573121   | 8.888959552    | 17.85537579     | 14.33764279    | 9.020817437    |
| 2.723242739   | 8.904363612    | 16.22561954     | 12.22131161    | 7.554802148    |
| 3.469110086   | 6.880067083    | 16.39143429     | 13.87816445    | 9.498750988    |
| 6.116485868   | 7.741543525    | 16.26889979     | 15.95403079    | 9.78200783     |
| 7.13341353    | 3.524158002    | 16.42419944     | 16.66655496    | 9.976866016    |
| 1.527893669   | 8.759863601    | 17.54159726     | 9.906398152    | 9.396709882    |
| 0.303836606   | 7.03736608     | 16.94567579     | 10.4814566     | 7.310735765    |
| 3.839551376   | 7.135030114    | 16.94364122     | 12.20786815    | 9.92672637     |
| 6.502188769   | 7.606239271    | 16.23111194     | 15.19836049    | 10.20168297    |
| 2.566304445   | 8.11378553     | 16.54359253     | 13.14189508    | 8.419774398    |
| 1.20719374    | 7.465956369    | 15.43866318     | 11.32956351    | 9.225531468    |
| 2.776662271   | 9.218246538    | 17.14975342     | 12.53132783    | 7.623849396    |
| 4.691999147   | 7.406218134    | 16.83247021     | 15.87203602    | 8.631004904    |
| 1.265527758   | 7.309246903    | 17.44777271     | 10.81535195    | 10.47293239    |
| 2.765044375   | 8.203883556    | 17.06389978     | 12.30715967    | 8.388910705    |
| 6.726418693   | 6.72403177     | 16.33312997     | 15.40048179    | 7.337407261    |
| 6.538674334   | 8.247439025    | 17.99399607     | 15.47666748    | 10.04527027    |
| 7.652873704   | 6.834323281    | 16.42746759     | 17.67664721    | 7.196666354    |
| 7.299728679   | 8.245062763    | 17.1189373      | 16.25420302    | 8.504840443    |
| 3.428955022   | 9.411312771    | 17.7985623      | 14.17110669    | 8.589952431    |
| 5.872478223   | 8.297992608    | 17.62691526     | 16.13156969    | 8.812375591    |
| 2.498474769   | 7.206385392    | 16.0076813      | 11.59184022    | 9.676723267    |
| 6.287203291   | 9.235141104    | 19.11611151     | 16.11934318    | 9.18208903     |
| 3.375281757   | 8.521716321    | 17.45504905     | 12.94739353    | 9.972826098    |
| 3.915165228   | 8.195451397    | 17.26169703     | 13.36306953    | 9.488540221    |
| 1.310047431   | 8.294652243    | 18.05550063     | 9.409673952    | 8.61063828     |
| 3.300941349   | 8.585374529    | 16.97694847     | 14.52478008    | 7.414797601    |
| 4.968034882   | 8.24254696     | 17.34596356     | 14.47001808    | 9.739970424    |
| 4.192292691   | 9.558035531    | 16.96475145     | 14.67344603    | 9.450768051    |
| 4.355945749   | 9.719467431    | 17.36935283     | 14.36229874    | 7.835576681    |
| 6.575988605   | 7.459723441    | 15.50664463     | 15.33460983    | 7.258508313    |
| 5.808776748   | 8.9136096      | 17.08393582     | 14.81458218    | 7.140272481    |
| 3.583225682   | 7.283520139    | 16.80151191     | 12.2922232     | 8.726703006    |
| 2.003262252   | 7.237509341    | 16.08138901     | 11.46285659    | 7.72793101     |
| 0             | 8.893960411    | 17.42113709     | 10.295967      | 6.653560739    |
| 6.080239334   | 8.271689183    | 16.61226592     | 15.89612734    | 9.085782721    |
| 4.754865294   | 8.26723862     | 16.99107494     | 12.84334214    | 8.017583143    |
| 6.913853236   | 7.611587108    | 16.51509621     | 17.02910804    | 6.292476995    |
| 4.106623717   | 8.261060611    | 17.10138852     | 14.34789639    | 10.53675387    |
| 1.641248092   | 7.836997688    | 16.9210262      | 9.275305088    | 9.770861144    |
| 3.093511142   | 8.063541053    | 17.64171681     | 12.43590469    | 7.291127484    |



|             |             |             |             |             |
|-------------|-------------|-------------|-------------|-------------|
| 1.436043744 | 7.135733028 | 15.86588322 | 11.28099287 | 9.104039639 |
| 0           | 8.000626968 | 17.10213116 | 8.349040591 | 9.031196239 |
| 6.446829635 | 7.622416095 | 16.00473665 | 15.30450898 | 7.185558476 |
| 0           | 9.795187255 | 16.51477783 | 11.88863046 | 6.793213357 |
| 7.809753844 | 7.051258418 | 16.62371106 | 17.20473978 | 9.42490949  |
| 5.307576313 | 7.226576152 | 15.8624472  | 16.2713201  | 7.784422244 |
| 3.981677485 | 7.988172373 | 16.2916539  | 12.86515463 | 9.777393291 |
| 2.363305925 | 7.037191869 | 16.76765063 | 11.56053712 | 10.86972317 |
| 6.497074097 | 7.815575115 | 16.77654459 | 17.20317682 | 6.968915119 |
| 3.474650497 | 7.446819848 | 15.8849302  | 13.37478861 | 8.979969214 |
| 0.061877418 | 7.765630796 | 18.00213699 | 8.97229938  | 10.54076197 |
| 2.301844572 | 7.136218477 | 15.94164142 | 13.53929612 | 9.98467466  |
| 4.616363305 | 9.22199946  | 17.44692272 | 14.38639266 | 7.842098509 |
| 1.053781669 | 8.350270496 | 17.30002883 | 10.3117769  | 9.133533442 |
| 6.055850231 | 7.564364731 | 15.97137748 | 15.16122823 | 7.626302371 |
| 1.178473704 | 8.503431117 | 15.73119571 | 9.158122364 | 7.190396652 |
| 2.279992843 | 8.347602663 | 17.27456881 | 13.19830746 | 10.96159677 |
| 3.710620788 | 6.976520216 | 16.88825356 | 14.49178086 | 6.868713482 |
| 3.853441602 | 7.715194479 | 16.39817865 | 12.42783412 | 10.59143371 |
| 4.572166596 | 11.23501284 | 19.10571609 | 14.78736757 | 7.932709772 |
| 4.666693045 | 6.643806245 | 16.5616869  | 12.92515128 | 10.29784287 |
| 6.552795953 | 7.372194828 | 17.21685691 | 15.76316849 | 9.890033734 |
| 3.887706021 | 7.797956249 | 17.0869546  | 12.87367572 | 7.92903791  |
| 1.283477732 | 7.925440706 | 16.38600641 | 10.65143289 | 9.875346904 |
| 3.347560527 | 9.706325839 | 17.85764742 | 13.38735358 | 7.228855206 |
| 6.248752123 | 7.340122865 | 16.71243523 | 14.90714488 | 10.11297725 |
| 5.993280768 | 6.097193942 | 17.05651556 | 16.43728062 | 8.396275914 |
| 6.751547228 | 8.748027288 | 17.21718269 | 16.57535605 | 9.208328066 |
| 8.205790057 | 8.11392134  | 17.33050997 | 17.2564442  | 9.78516024  |
| 7.012400707 | 7.055738878 | 16.33449801 | 15.64311287 | 8.461783996 |
| 5.655278884 | 6.775580487 | 16.78242927 | 16.29729561 | 7.818629081 |
| 3.199612171 | 8.694153559 | 18.55529895 | 12.23815446 | 10.07857305 |
| 7.625740997 | 7.959943735 | 16.59420037 | 16.17928679 | 7.854751592 |
| 3.044883981 | 8.247618041 | 16.14631529 | 14.06925683 | 7.567827079 |
| 3.286567275 | 9.254931562 | 17.76045056 | 13.66472611 | 7.627272483 |
| 1.100092538 | 7.596522467 | 16.99736915 | 10.92741817 | 10.07679771 |
| 3.948312257 | 6.923341473 | 16.27839362 | 13.32267031 | 10.22074823 |
| 3.914498563 | 7.722220631 | 17.02872603 | 13.39965234 | 8.944630138 |
| 5.620834693 | 8.449389002 | 16.99684771 | 15.39062654 | 10.68138124 |
| 8.457886023 | 8.049170493 | 16.92553137 | 17.90118909 | 7.207194179 |
| 2.009331915 | 8.868008769 | 16.96277436 | 12.99849566 | 8.653016694 |
| 7.427738054 | 7.558378437 | 17.02905953 | 15.99850253 | 10.49327557 |
| 5.89704452  | 7.622724069 | 17.75130193 | 15.37763392 | 8.167332973 |
| 2.01430084  | 8.699249104 | 17.50690965 | 12.80662419 | 8.728023277 |
| 3.853638011 | 7.095557278 | 15.6633936  | 14.3436261  | 9.295875989 |
| 1.88868847  | 7.648816188 | 16.84791432 | 9.768885248 | 8.415274001 |
| 5.978410019 | 8.77766017  | 18.21838119 | 15.35473787 | 8.963500448 |
| 5.419813518 | 7.618365647 | 17.75476603 | 14.01750696 | 7.167218027 |
| 6.439377639 | 7.871458656 | 16.64628592 | 14.85889926 | 9.420149139 |
| 3.023363901 | 7.451936219 | 16.15104155 | 11.64416908 | 9.790628187 |
| 4.229319825 | 7.861756139 | 16.63366963 | 13.96135024 | 8.951931241 |
| 1.722996576 | 7.782293515 | 16.23810263 | 11.27476692 | 8.526956089 |
| 2.240686722 | 8.498268339 | 16.79254863 | 11.83726367 | 8.78435861  |
| 6.734453697 | 7.796102874 | 16.84200356 | 16.59030806 | 10.47940544 |
| 8.307794686 | 6.699489536 | 15.7913602  | 16.77281763 | 5.647839944 |
| 2.018908527 | 6.883550555 | 16.53315685 | 11.60156418 | 9.95021338  |
| 1.172585253 | 8.566259784 | 17.17206106 | 10.65029129 | 9.182309158 |
| 4.24886825  | 8.281830052 | 17.29403794 | 13.91300897 | 8.0656849   |

|             |             |             |             |             |
|-------------|-------------|-------------|-------------|-------------|
| 3.612478868 | 7.595700363 | 17.09994987 | 12.44453028 | 8.4657782   |
| 7.407798085 | 8.032062707 | 16.89921805 | 16.37539636 | 7.9807935   |
| 1.360356634 | 7.671884977 | 17.24086266 | 10.70128037 | 8.858186442 |
| 7.527593388 | 6.107697462 | 16.57318086 | 17.68313148 | 7.357496114 |
| 5.874172104 | 9.640711138 | 16.33391183 | 15.17022796 | 6.139055662 |
| 2.977428585 | 7.950320648 | 16.91796348 | 11.84630277 | 9.177833061 |
| 6.711506176 | 6.741723469 | 15.86987087 | 15.36538929 | 9.753494018 |
| 4.99066498  | 7.855142379 | 17.512585   | 15.70131858 | 6.573327918 |
| 6.833315938 | 7.12990307  | 17.14293846 | 16.24014922 | 10.05653031 |
| 1.325266333 | 6.9103798   | 16.69682847 | 10.01214261 | 10.39441111 |
| 1.688098001 | 7.982963291 | 17.43401438 | 12.04558408 | 8.976917797 |
| 5.415451838 | 7.434988584 | 16.90627559 | 15.01954989 | 11.0171353  |
| 2.425277537 | 7.728229406 | 16.08428744 | 11.45730673 | 8.015832771 |
| 3.939305792 | 7.744840466 | 17.73735995 | 12.16231872 | 10.4462133  |
| 3.408296633 | 8.387524363 | 16.98042123 | 13.3132464  | 7.535730466 |
| 6.507356279 | 7.31878796  | 16.14876047 | 17.22088687 | 7.753300013 |
| 4.788467873 | 7.26473453  | 16.2951798  | 14.26624252 | 10.17348181 |
| 0           | 8.208991534 | 17.28905366 | 9.807103607 | 9.738561212 |
| 5.46373981  | 9.736291962 | 16.93154826 | 15.49422297 | 9.151320165 |
| 9.927181424 | 9.994593911 | 18.47743639 | 19.90047588 | 7.755522769 |
| 3.199983701 | 7.552146455 | 17.10686654 | 12.26189609 | 9.246423413 |
| 3.201122191 | 8.967361968 | 17.54168768 | 12.01950415 | 9.271109134 |
| 5.105009792 | 7.597339249 | 16.5327532  | 13.84230199 | 7.139688805 |
| 6.972340038 | 7.529186294 | 16.73946312 | 15.72399401 | 9.371396754 |
| 2.191495896 | 8.795240265 | 17.40518955 | 11.71795334 | 11.52372176 |
| 3.287746706 | 7.291435067 | 16.37313551 | 12.98915028 | 9.170463452 |
| 5.826071541 | 7.247829247 | 17.29277755 | 16.53358937 | 6.904205345 |
| 8.60336106  | 8.195223514 | 17.07837663 | 18.12048929 | 8.91728095  |
| 5.629728303 | 7.491256551 | 16.64434295 | 14.8918649  | 9.559107506 |
| 2.375213252 | 7.497134201 | 17.51138226 | 13.7431464  | 7.790490205 |
| 6.3005004   | 9.440016746 | 16.81898371 | 15.37433621 | 6.374389841 |
| 1.892928339 | 8.18807051  | 17.75882149 | 11.33185937 | 10.73315632 |
| 8.54588228  | 7.549382371 | 16.60733735 | 17.24942616 | 9.500307709 |
| 1.704344157 | 7.245984958 | 16.98533897 | 11.49529124 | 7.298137609 |
| 0.97920707  | 7.623607479 | 17.03202695 | 9.406163709 | 10.10867762 |
| 3.086948914 | 8.637106578 | 17.14777052 | 13.10043718 | 10.53287214 |
| 1.309566953 | 7.619047868 | 17.58384499 | 11.04960866 | 10.73865676 |
| 4.868794364 | 6.662564215 | 17.85992467 | 13.34375238 | 9.948748934 |
| 6.471323725 | 8.254585147 | 16.72307226 | 15.70340917 | 6.894799932 |
| 3.080123023 | 7.879779034 | 16.86826832 | 12.22850688 | 7.983637094 |
| 2.145780929 | 8.276226319 | 16.97435645 | 10.8043878  | 7.367723083 |
| 5.891855337 | 7.342078605 | 16.66396782 | 14.4996219  | 7.73415706  |
| 8.128043563 | 7.637653082 | 16.72991885 | 16.34446368 | 9.619591627 |
| 4.932024585 | 6.9530649   | 15.70319254 | 13.29379952 | 9.142576514 |
| 7.04094296  | 7.466062414 | 16.04066113 | 15.77643373 | 9.433980908 |
| 6.858432614 | 7.041105399 | 17.20519851 | 15.5858363  | 7.536377354 |
| 5.486570722 | 7.727976878 | 16.53604409 | 14.89829897 | 8.354007436 |
| 0.903252716 | 8.184404125 | 17.53071997 | 10.24786242 | 10.08922217 |
| 3.766720753 | 7.107391934 | 16.31707773 | 13.8492767  | 10.72191975 |
| 4.783797223 | 7.63152562  | 16.47010166 | 14.30515928 | 8.77650685  |
| 6.519514067 | 8.490285528 | 16.65624461 | 16.42110553 | 4.650032727 |
| 6.166748865 | 8.235637919 | 17.10619542 | 15.0705135  | 6.643407909 |
| 2.729186895 | 7.667191889 | 17.49759071 | 11.20833076 | 9.564922644 |
| 8.31808608  | 9.159494365 | 18.18761156 | 17.22325492 | 9.737845404 |
| 6.813343799 | 6.879309087 | 16.71318029 | 16.47319096 | 9.389249244 |
| 6.099352425 | 8.120070138 | 17.11630146 | 14.55255401 | 8.775481066 |
| 4.847931839 | 7.740580217 | 17.2610377  | 14.97328115 | 7.531082442 |
| 3.999111878 | 6.393650227 | 17.35513149 | 13.54714617 | 8.570592225 |

| hsa-miR-450a-5p | hsa-miR-221-3p | hsa-miR-1307-3p | hsa-miR-511-5p | hsa-miR-660-5p |
|-----------------|----------------|-----------------|----------------|----------------|
| 6.100169389     | 8.782277571    | 12.2397845      | 6.008505231    | 8.369938222    |
| 4.245380014     | 8.067932386    | 13.12957528     | 3.324959295    | 7.51301651     |
| 5.3438391       | 9.013938811    | 12.37446747     | 7.176193836    | 7.777438665    |
| 4.483394531     | 9.063039154    | 13.59187388     | 5.518974968    | 9.495250352    |
| 6.743903485     | 8.585241713    | 11.923374       | 5.505606501    | 8.062071392    |
| 3.232651239     | 10.58314352    | 12.37557741     | 6.400897382    | 7.87584952     |
| 5.293774789     | 9.019117467    | 12.43183052     | 6.473638145    | 8.542211277    |
| 6.339655968     | 8.600327281    | 12.47575182     | 5.197602227    | 8.616288765    |
| 5.688484054     | 9.6668863      | 12.65096365     | 4.926241252    | 8.928918647    |
| 3.023917179     | 7.561444434    | 14.20080686     | 5.790866359    | 8.140663549    |
| 6.382697295     | 9.027368269    | 11.92960046     | 4.644293818    | 9.295327416    |
| 5.899738006     | 8.74275513     | 12.17432673     | 5.806270047    | 8.850417487    |
| 4.080013752     | 8.544392357    | 11.53862385     | 5.093611458    | 8.7460204      |
| 5.180239717     | 9.334239969    | 13.63217794     | 6.670854894    | 8.577462091    |
| 5.465772077     | 9.495959795    | 13.42963965     | 6.039055755    | 8.638262597    |
| 4.60168583      | 10.79430263    | 13.8703622      | 5.534691615    | 9.348547385    |
| 5.756914015     | 10.49703856    | 12.77928439     | 8.162065368    | 7.589459273    |
| 6.641510268     | 8.533252333    | 11.07571721     | 6.571858356    | 7.110898898    |
| 5.778270123     | 9.312783282    | 11.9442657      | 6.78166458     | 7.844227413    |
| 4.444416506     | 7.52480263     | 12.55903817     | 5.175358549    | 8.410347297    |
| 4.453895214     | 9.986968877    | 13.44321605     | 6.53285783     | 10.47950898    |
| 3.669213656     | 7.912261401    | 12.62087032     | 3.027762804    | 8.442974261    |
| 5.353160229     | 10.16384183    | 12.2953306      | 5.729553708    | 8.276062937    |
| 4.740291673     | 8.478090072    | 12.01098293     | 5.362121772    | 8.077393364    |
| 4.646188585     | 8.286172633    | 12.35162096     | 4.974100074    | 8.614159036    |
| 4.642866307     | 7.488082484    | 12.50087309     | 5.300648825    | 6.671059081    |
| 3.96716783      | 10.51820951    | 14.9608354      | 5.175723791    | 9.055684136    |
| 3.456254077     | 8.513619997    | 11.9308661      | 6.495310853    | 7.385042873    |
| 4.487313725     | 10.11674055    | 12.19481139     | 5.730639032    | 8.911707518    |
| 4.195329489     | 7.796271918    | 13.47775214     | 4.657308957    | 9.698076941    |
| 5.593086473     | 9.13470645     | 12.73158769     | 4.554365481    | 7.378134459    |
| 5.284923639     | 8.860597815    | 12.82744817     | 5.727438739    | 9.680749202    |
| 6.187836444     | 7.849545263    | 13.3988373      | 4.214361146    | 7.490570493    |
| 5.798522274     | 8.909249848    | 12.38576884     | 7.809730677    | 8.492954858    |
| 4.53566229      | 7.562857522    | 13.23988471     | 6.589608561    | 9.187117209    |
| 4.673901859     | 9.355130692    | 12.20366359     | 4.546717794    | 8.487785095    |
| 5.710516404     | 10.12614573    | 12.38211373     | 5.439286456    | 7.782755214    |
| 4.280138896     | 11.41322171    | 13.08975338     | 3.608219509    | 9.788810149    |
| 3.84391192      | 9.92244042     | 12.78422872     | 4.855972858    | 9.098368821    |
| 5.63485675      | 9.96840432     | 12.83774091     | 6.089243702    | 9.232399801    |
| 4.266996242     | 8.376034623    | 14.33114406     | 6.382048401    | 8.676056459    |
| 3.768028559     | 9.350805062    | 12.42561775     | 6.051481382    | 7.920204556    |
| 4.966253228     | 9.347567606    | 13.64961076     | 6.042401175    | 8.392757404    |
| 6.651497361     | 8.364261135    | 12.91845234     | 5.149413885    | 8.690547687    |
| 6.234282252     | 9.352294219    | 14.02015556     | 5.065107998    | 9.022197427    |
| 5.08674682      | 7.929872652    | 11.81455492     | 5.086507309    | 7.094047006    |
| 5.032931878     | 8.756507826    | 13.33414523     | 6.367365242    | 8.28027525     |
| 4.616445508     | 8.695843635    | 12.44096531     | 5.408775736    | 8.78644025     |
| 4.213824857     | 6.893889946    | 11.86055033     | 7.379240108    | 8.022240465    |
| 3.867907939     | 8.952092793    | 13.94381011     | 5.795187917    | 7.332580604    |
| 5.505892871     | 10.25273432    | 12.69228234     | 6.10160042     | 8.117589976    |
| 5.228009872     | 9.388008799    | 12.42704889     | 3.66103359     | 9.281810906    |
| 2.556727043     | 8.842297578    | 12.66901462     | 6.023430949    | 7.431529537    |
| 5.864403635     | 8.748065888    | 12.36608214     | 6.502532197    | 9.147624024    |
| 5.956980629     | 10.61190601    | 13.40846094     | 5.56617095     | 9.067108474    |
| 4.011793168     | 9.550324243    | 13.1732163      | 5.364878089    | 8.798451472    |

|             |             |             |             |             |
|-------------|-------------|-------------|-------------|-------------|
| 5.836775458 | 8.706299814 | 11.69338562 | 6.275088798 | 7.314073051 |
| 4.239224234 | 9.604249375 | 12.26072263 | 3.782654991 | 9.900685238 |
| 5.101829137 | 9.111445817 | 12.65824007 | 6.747852949 | 7.869743853 |
| 3.60652329  | 9.876431133 | 13.85096242 | 5.481594    | 7.927455265 |
| 4.497150551 | 8.088361835 | 11.90222132 | 5.535987776 | 7.788659701 |
| 5.629512504 | 9.152472187 | 11.37573158 | 5.477228399 | 6.957399997 |
| 5.445986955 | 8.113082081 | 12.53573964 | 6.18380825  | 8.489528005 |
| 4.747726369 | 9.260612443 | 12.19121474 | 4.954426287 | 8.524412681 |
| 4.482485455 | 10.0828967  | 12.38894205 | 4.207077358 | 7.055706838 |
| 5.491643173 | 9.973009902 | 13.03753089 | 5.782931219 | 8.328597435 |
| 4.382145805 | 8.753941942 | 13.84238958 | 5.586747485 | 8.925213546 |
| 5.146727522 | 7.930487238 | 10.81464342 | 6.561469155 | 7.298259198 |
| 5.29421872  | 8.593750433 | 13.57700676 | 6.141962183 | 9.708085523 |
| 5.941862273 | 9.189127607 | 12.60651473 | 4.195903993 | 9.238713673 |
| 4.745781298 | 8.2898278   | 12.5246716  | 6.93004257  | 7.233696492 |
| 3.72667944  | 9.173379155 | 13.52289581 | 6.51001982  | 8.527545159 |
| 5.941276697 | 8.641103581 | 13.14405148 | 7.272259942 | 8.138649399 |
| 4.180265734 | 8.707748168 | 11.92817164 | 7.494508122 | 6.470142057 |
| 5.024973421 | 7.584846184 | 13.85133546 | 6.051286309 | 7.230779074 |
| 5.178262492 | 10.66764667 | 14.43568134 | 4.749196567 | 9.740147218 |
| 5.308249707 | 8.628891871 | 11.44480247 | 4.522704186 | 8.054957549 |
| 4.074318537 | 8.948183357 | 12.5445306  | 5.120501412 | 8.495615341 |
| 4.41452253  | 9.742063411 | 12.64930796 | 5.353491647 | 8.738192015 |
| 5.074033452 | 8.169984987 | 12.65039499 | 5.720103862 | 8.447796149 |
| 3.792759971 | 10.79852049 | 13.94346133 | 4.407250173 | 9.034588868 |
| 6.061781062 | 8.512776674 | 11.63981259 | 6.132311794 | 8.609446095 |
| 5.881101114 | 7.848551133 | 11.69683741 | 5.729508721 | 6.683114215 |
| 5.853072941 | 9.615572286 | 11.95536823 | 5.362796151 | 9.167146839 |
| 5.990985484 | 9.42200764  | 12.45319596 | 4.73804413  | 8.871045029 |
| 4.578721375 | 8.1628707   | 12.96138444 | 4.329195932 | 8.08404089  |
| 4.085902423 | 7.180126304 | 12.87250211 | 4.745371289 | 6.875859175 |
| 4.983691095 | 10.14159289 | 13.12928503 | 6.374233443 | 9.719971105 |
| 3.973589813 | 9.05157503  | 11.43828158 | 4.201301554 | 9.11604857  |
| 4.209579667 | 9.011601456 | 12.10485895 | 5.364668731 | 7.985331714 |
| 3.745556452 | 9.883364852 | 13.11384848 | 4.836213338 | 9.406733382 |
| 5.682786199 | 9.930604989 | 13.48029398 | 6.06700414  | 8.479610291 |
| 6.156082572 | 7.39717441  | 11.7615225  | 7.145967246 | 7.553275385 |
| 5.255744902 | 9.732510654 | 12.58472592 | 5.177752041 | 8.834538449 |
| 4.722385417 | 10.95997349 | 12.33020271 | 4.790576611 | 9.423441573 |
| 4.135305111 | 9.76271356  | 12.25560401 | 4.810448643 | 8.020276402 |
| 4.916352407 | 9.371996446 | 13.04086951 | 5.836460577 | 7.694372663 |
| 5.777378976 | 8.07287165  | 11.97548766 | 6.153664962 | 8.181992891 |
| 4.13848176  | 8.806931225 | 13.0285399  | 5.428017052 | 8.192607255 |
| 4.32885824  | 8.947185318 | 13.16408894 | 5.625742995 | 8.745681557 |
| 4.223243835 | 8.549331214 | 11.22516457 | 3.356049313 | 7.462772312 |
| 5.033788296 | 9.620427969 | 12.85844958 | 6.816091386 | 8.894062518 |
| 5.525328226 | 10.38174706 | 13.77198388 | 5.230033198 | 9.613299864 |
| 6.083150597 | 9.432490435 | 13.06537668 | 3.429954376 | 8.062061682 |
| 6.017377881 | 8.03166794  | 12.59668147 | 4.037590518 | 9.232411935 |
| 5.112596912 | 7.509498689 | 12.79686327 | 5.640042801 | 8.823397419 |
| 5.699612808 | 8.92916769  | 12.74378092 | 5.274058504 | 8.740199435 |
| 6.497066287 | 9.785323508 | 11.8207359  | 6.810146168 | 8.661397643 |
| 4.883100563 | 9.601428234 | 12.70491727 | 6.950317427 | 9.273247547 |
| 4.973901044 | 6.867473576 | 12.06883233 | 5.649822642 | 7.73884051  |
| 5.819560208 | 10.54656833 | 10.83563902 | 3.719342109 | 8.878880622 |
| 5.96128116  | 8.267347133 | 11.84244995 | 6.470511618 | 8.399226853 |
| 5.544561173 | 9.465095411 | 12.92883814 | 5.002157823 | 8.772450933 |
| 4.105208837 | 8.390445518 | 13.48351049 | 5.760198295 | 8.814146596 |

|             |             |             |             |             |
|-------------|-------------|-------------|-------------|-------------|
| 4.469315162 | 9.417187706 | 13.3990189  | 4.548363327 | 9.215018482 |
| 6.146277962 | 10.27214239 | 12.42368489 | 4.754426585 | 8.868491217 |
| 3.686386801 | 7.801302607 | 13.05792449 | 3.842585865 | 8.254261254 |
| 4.285436116 | 8.788779125 | 12.90245153 | 4.45557092  | 6.1580655   |
| 3.824689271 | 7.691087257 | 12.54652872 | 6.313756894 | 10.10597423 |
| 6.230511448 | 8.696871419 | 12.56692616 | 5.139050099 | 8.606863354 |
| 5.446991137 | 8.735031877 | 10.90186913 | 5.447301364 | 7.09300554  |
| 4.74677103  | 9.982685799 | 13.40295853 | 5.439982916 | 6.997524714 |
| 5.497733928 | 8.334082699 | 12.01201497 | 2.965766633 | 9.006657572 |
| 5.536646765 | 8.457650629 | 12.58754014 | 5.704006007 | 9.495347554 |
| 3.830721772 | 7.637268398 | 11.65757024 | 3.830803223 | 9.129224332 |
| 5.158512652 | 8.476151499 | 12.28545525 | 6.924991427 | 7.791720964 |
| 5.610680895 | 8.580559816 | 13.42087461 | 5.328241468 | 8.098297463 |
| 5.735939647 | 7.542308107 | 12.6304028  | 5.225466814 | 8.529113913 |
| 4.088847989 | 9.352785012 | 12.54411721 | 4.337507078 | 9.061663045 |
| 2.956790775 | 7.061021789 | 12.1184062  | 4.860389421 | 6.653023019 |
| 4.297444693 | 7.702067726 | 12.53223804 | 5.206135479 | 7.915394319 |
| 5.806492348 | 8.83580859  | 12.15606679 | 5.988853632 | 9.522726832 |
| 5.32956329  | 8.813767486 | 13.20857805 | 6.672141506 | 9.18573522  |
| 4.148482307 | 10.84878358 | 13.07865698 | 4.358493513 | 9.523748567 |
| 5.878944662 | 9.11879692  | 12.39017959 | 6.37463092  | 8.931737003 |
| 4.92016282  | 11.27002786 | 13.15456081 | 4.83737275  | 9.973181912 |
| 4.712938972 | 7.927923579 | 12.90768921 | 5.105299157 | 9.228009868 |
| 6.048977775 | 8.828497191 | 12.38948856 | 4.789844585 | 8.343908932 |
| 5.204924971 | 9.913319037 | 13.61580109 | 6.310965839 | 8.886707369 |
| 5.651196136 | 8.462680093 | 11.76797638 | 6.340681475 | 8.029687185 |
| 3.978162545 | 8.8442369   | 13.61348606 | 5.538499463 | 6.921729434 |
| 5.834061689 | 11.11542678 | 14.01166221 | 4.538384781 | 8.474488698 |
| 4.912280991 | 7.516983466 | 11.99410702 | 6.106444989 | 8.184549556 |
| 4.86831526  | 8.749168855 | 12.81265175 | 4.059903064 | 7.83075293  |
| 5.666354357 | 9.1697445   | 13.31711611 | 5.427029727 | 8.633475605 |
| 4.514062728 | 10.25604546 | 12.0506438  | 4.393937017 | 10.12449146 |
| 5.265073318 | 9.187446083 | 13.61125068 | 5.942680127 | 8.774817361 |
| 3.145154608 | 12.17082485 | 12.44331875 | 4.475561321 | 9.275437511 |
| 4.551384815 | 8.184513697 | 12.40742551 | 4.824179364 | 8.766227101 |
| 5.907141131 | 9.168340289 | 12.89765068 | 5.978001055 | 8.700112975 |
| 4.15782306  | 8.17382503  | 12.91772435 | 5.053156467 | 8.76604961  |
| 3.759976386 | 10.38724741 | 12.01476788 | 5.149128659 | 8.489240099 |
| 5.340757812 | 9.43070773  | 12.92618519 | 3.981837732 | 9.175839228 |
| 5.32053706  | 9.004270856 | 13.2227004  | 6.119964599 | 8.745730862 |
| 4.170641438 | 8.333120102 | 13.27595139 | 6.996853872 | 7.979058733 |
| 5.647637547 | 7.734136834 | 13.73813724 | 4.796201521 | 7.98751442  |
| 5.44491065  | 8.619261823 | 12.83173347 | 5.48927765  | 8.144116576 |
| 7.010089256 | 8.754000514 | 11.78565574 | 5.58099204  | 8.244520238 |
| 4.515469435 | 7.643762152 | 13.21934091 | 2.708326628 | 7.792932796 |
| 4.420852652 | 8.780515459 | 11.000247   | 4.712430501 | 8.587184154 |
| 6.312594538 | 8.527431755 | 12.58893006 | 5.486548818 | 8.120321428 |
| 4.839710501 | 8.860610278 | 12.61472738 | 5.645277185 | 9.409099344 |
| 6.502508842 | 7.470081986 | 11.58888154 | 7.06003592  | 8.213960566 |
| 6.270527424 | 8.403964815 | 12.59357354 | 5.74013144  | 8.265347826 |
| 3.671858889 | 6.153204771 | 12.42119472 | 5.915037835 | 8.222693911 |
| 4.670451036 | 7.662096159 | 13.37782364 | 4.802941535 | 8.364234913 |
| 4.669565796 | 8.996911079 | 12.87811544 | 5.199250127 | 8.40001585  |
| 4.136112838 | 11.18143729 | 13.48969559 | 4.965542932 | 9.460573378 |
| 5.633657645 | 8.080808996 | 12.8150244  | 4.914756683 | 7.76606339  |
| 4.069511867 | 8.930339483 | 12.89228321 | 4.725062451 | 8.954726776 |
| 2.502041933 | 7.151402242 | 13.22598829 | 5.563509987 | 7.398879237 |
| 6.20723931  | 8.680454304 | 12.50328396 | 6.585577421 | 8.63814324  |

| hsa-miR-1248 | hsa-miR-1180-3p | hsa-miR-1269a | hsa-miR-101-3p | hsa-miR-222-3p |
|--------------|-----------------|---------------|----------------|----------------|
| 0.068198718  | 6.162811166     | 3.952854535   | 15.16839565    | 7.02961453     |
| 0.045229783  | 8.259647296     | 10.00019555   | 14.64965672    | 6.480511348    |
| 0.0222812    | 6.746482081     | 14.11765776   | 15.62667061    | 7.443928534    |
| 1.054033454  | 5.450387529     | 3.547231772   | 17.00241754    | 6.95183007     |
| 1.330116634  | 4.346439496     | 9.030930831   | 15.69076482    | 7.203899764    |
| 0.032125017  | 5.97917666      | 5.002689879   | 18.01533627    | 7.815615984    |
| 1.429343664  | 6.212153435     | 12.50936622   | 16.37867856    | 5.928243252    |
| 1.660033815  | 6.378345216     | 10.16929025   | 16.1257018     | 6.587473069    |
| 1.504456353  | 6.868438558     | 3.587104384   | 16.27953686    | 7.647625674    |
| 0.03028926   | 9.131110039     | 13.74172462   | 15.07797959    | 6.018818867    |
| 0            | 5.176741321     | 1.069262967   | 16.19692091    | 7.489535404    |
| 2.220368029  | 6.203397174     | 5.404227828   | 16.08351954    | 7.171389986    |
| 0.067830967  | 6.349874865     | 13.07568158   | 17.29472606    | 6.101255157    |
| 2.97758569   | 8.606833395     | 9.142529869   | 14.72958814    | 7.840571618    |
| 2.141642697  | 9.717676275     | 9.919685099   | 13.15638402    | 8.349365218    |
| 1.729524668  | 7.157970335     | 0.043120815   | 17.12590252    | 8.146786655    |
| 1.061203322  | 5.504573047     | 4.126105471   | 14.19066259    | 9.070767553    |
| 0.372325375  | 5.369184417     | 2.315107519   | 16.97644372    | 5.910319966    |
| 0.050500746  | 6.117265177     | 10.56926571   | 17.32328303    | 6.694742371    |
| 1.612767524  | 7.863522552     | 5.331224682   | 16.10052151    | 5.660452876    |
| 0.104859411  | 6.588862234     | 12.89105317   | 15.76684468    | 6.973497956    |
| 0.161825196  | 3.668643684     | 9.045514755   | 16.46239604    | 6.026499003    |
| 0.018338784  | 5.636664152     | 11.02442063   | 16.28534715    | 7.076917621    |
| 0.089235822  | 5.75420546      | 10.23890085   | 17.03421556    | 6.602603847    |
| 1.395285806  | 6.420118847     | 5.748443966   | 16.51956819    | 6.733002597    |
| 0.707675725  | 5.923570497     | 9.467197569   | 17.54613161    | 6.002860433    |
| 0            | 8.605919826     | 12.20720053   | 15.72978342    | 8.305503119    |
| 0.039302852  | 5.859755717     | 11.01788552   | 16.82079225    | 6.006121385    |
| 0.053467638  | 5.362155927     | 13.22990945   | 16.82217084    | 8.297392371    |
| 0.025653627  | 6.469255176     | 5.522690626   | 17.76942315    | 4.954158467    |
| 2.417386739  | 5.243362236     | 11.0677084    | 15.38725524    | 7.498705727    |
| 0            | 6.523076527     | 2.806921616   | 16.25261885    | 5.906406853    |
| 0            | 6.453519872     | 2.257392774   | 15.98208293    | 6.150584274    |
| 0            | 6.012903697     | 11.54952163   | 16.21983469    | 6.596465538    |
| 0.060202817  | 7.218140942     | 12.051838     | 15.64523798    | 5.886190635    |
| 0.15507292   | 4.404741282     | 12.46200204   | 15.18454757    | 7.673510193    |
| 0.077694747  | 7.065959914     | 0.131561053   | 15.33505345    | 8.228970263    |
| 1.776264043  | 8.193061976     | 13.37066205   | 15.62653055    | 8.621561532    |
| 0.052457036  | 6.449095893     | 14.42065988   | 17.28668588    | 7.586656169    |
| 0.014105947  | 6.920113972     | 12.91898629   | 15.34608686    | 7.604899547    |
| 0.062301614  | 6.45435547      | 8.417938329   | 16.58941008    | 5.472915415    |
| 0.041818361  | 5.909113539     | 14.30608735   | 16.37264434    | 7.392940127    |
| 1.978311684  | 7.218073831     | 4.145665443   | 16.98571075    | 7.317317301    |
| 1.172957356  | 6.54384427      | 1.808982011   | 14.9100342     | 7.274247343    |
| 0.939587894  | 7.259733697     | 0.937259812   | 14.12409228    | 7.600620461    |
| 3.226554317  | 6.930420259     | 12.21881637   | 15.52077611    | 6.318346769    |
| 0.097154902  | 6.370211952     | 9.760269505   | 14.2711967     | 7.033318901    |
| 0.112671403  | 6.118535573     | 5.347547814   | 17.54303553    | 5.784800904    |
| 0.070155837  | 3.066398908     | 11.45013866   | 17.97789833    | 5.659986824    |
| 0            | 8.16277245      | 13.78469888   | 14.23828477    | 6.999605723    |
| 1.008153668  | 5.769027401     | 2.597379018   | 16.46234764    | 8.014278075    |
| 2.52544932   | 6.195995284     | 5.03920189    | 15.85954349    | 7.494370189    |
| 0.034495389  | 7.065228109     | 13.69407785   | 16.07686062    | 6.24717737     |
| 0.013853727  | 7.017696394     | 9.789283672   | 16.09761388    | 6.60254327     |
| 1.043234156  | 5.659514666     | 13.3160629    | 17.91843246    | 7.882715531    |
| 0            | 7.263509376     | 13.4008933    | 16.21037388    | 6.682568019    |

|             |             |             |             |             |
|-------------|-------------|-------------|-------------|-------------|
| 2.238545323 | 5.221979112 | 8.32885075  | 16.48158984 | 6.421294262 |
| 0           | 6.059020035 | 3.486854947 | 18.52496125 | 6.021521102 |
| 1.937325308 | 6.819328848 | 10.45632145 | 15.88770674 | 7.041120736 |
| 0           | 8.140119236 | 7.402804758 | 14.78849407 | 7.637578871 |
| 1.104618506 | 5.934415896 | 12.99375605 | 17.24756809 | 5.879950747 |
| 0           | 4.971510559 | 12.47822159 | 16.73859209 | 6.8991943   |
| 0           | 5.868345411 | 1.196520511 | 17.0013393  | 6.041204073 |
| 1.617449326 | 4.632264092 | 13.29166451 | 17.83063031 | 6.315093524 |
| 0           | 7.147556372 | 13.44729334 | 15.68881065 | 8.640600448 |
| 0.041898364 | 7.684949274 | 4.314687449 | 15.64425063 | 7.964463606 |
| 1.177980816 | 4.200467972 | 10.65274789 | 16.53498972 | 6.412840135 |
| 1.983225937 | 4.930992664 | 5.262110175 | 17.21413723 | 5.883412415 |
| 0           | 5.854661636 | 1.564330896 | 16.55440007 | 6.038058001 |
| 0           | 5.979127765 | 11.53510768 | 16.09967372 | 6.942005963 |
| 0           | 4.974521217 | 2.485531383 | 15.54337701 | 6.243108406 |
| 0.036075997 | 5.366815092 | 13.08898909 | 17.29579717 | 6.511160882 |
| 2.160072236 | 5.947554083 | 4.746742713 | 16.80642167 | 6.698701839 |
| 0.001323859 | 7.724984353 | 11.21108351 | 15.17338953 | 6.654569681 |
| 1.814345395 | 8.205281039 | 13.5078311  | 16.50595234 | 4.477963505 |
| 1.618401796 | 8.027231378 | 3.045228224 | 15.31507209 | 8.91730956  |
| 0.172864966 | 4.798062363 | 1.876263054 | 15.62242113 | 6.334471936 |
| 0.009632992 | 6.24702176  | 11.42831706 | 17.47877622 | 6.343964709 |
| 4.579093426 | 5.837121233 | 6.934716875 | 16.61304618 | 6.835455831 |
| 1.258266149 | 5.928631314 | 7.834028428 | 17.85979163 | 5.928813067 |
| 2.909372377 | 8.179364411 | 11.30165464 | 14.92262371 | 8.862991977 |
| 0           | 5.734622738 | 3.471060679 | 16.86561732 | 6.326137894 |
| 2.495708124 | 4.820085791 | 10.25594192 | 16.60188362 | 5.324633238 |
| 0           | 6.725013981 | 3.14253309  | 15.78370785 | 7.379438231 |
| 1.842916823 | 7.437382683 | 3.3789067   | 16.04260799 | 7.188544622 |
| 1.19930347  | 6.246464812 | 7.41879871  | 17.2281153  | 5.953663361 |
| 0.13135416  | 5.344375154 | 13.03727533 | 17.88278654 | 4.387826634 |
| 1.40217591  | 4.235565633 | 12.14590425 | 16.83868728 | 7.435117626 |
| 0           | 5.191573745 | 11.41859765 | 16.58923254 | 6.549950507 |
| 0.754417982 | 5.912075016 | 14.97590798 | 17.53199243 | 7.181259758 |
| 0           | 7.538295846 | 2.190359135 | 14.92524125 | 8.306135864 |
| 2.114208885 | 4.965851903 | 3.737205308 | 16.50749904 | 7.341520913 |
| 0           | 4.901257577 | 2.53813685  | 17.52178365 | 5.232189255 |
| 2.327730096 | 6.815296781 | 5.05220724  | 15.9782921  | 7.157702885 |
| 0.043527194 | 6.220383249 | 1.212693903 | 17.41675287 | 8.832288622 |
| 0           | 6.092927053 | 13.60773958 | 16.50281084 | 8.172519392 |
| 0           | 7.606652489 | 3.64331125  | 16.01992506 | 6.990262625 |
| 0           | 6.319042717 | 10.44728734 | 17.22632085 | 5.467933585 |
| 2.243148109 | 7.264450068 | 12.99785625 | 15.66602059 | 6.771482115 |
| 0.194987522 | 5.067218575 | 6.201612226 | 15.46718994 | 7.018422069 |
| 0.863373627 | 6.843694381 | 1.807735154 | 18.25379161 | 6.965452933 |
| 0           | 7.253585481 | 14.25987224 | 16.70464961 | 7.099640966 |
| 0           | 7.12498178  | 1.81655201  | 16.42563501 | 7.374475629 |
| 2.2649067   | 6.515810883 | 2.549221705 | 14.80263044 | 7.126763602 |
| 1.676380396 | 6.285505336 | 4.717852545 | 16.39690134 | 5.916812474 |
| 1.014671564 | 6.310922532 | 2.830186389 | 17.35322824 | 5.154526915 |
| 0.018450355 | 6.701342785 | 2.4470186   | 15.36811276 | 6.275784567 |
| 2.063310127 | 5.651470704 | 9.556882975 | 16.45847107 | 7.625595597 |
| 1.157233679 | 7.142667772 | 12.79225278 | 15.99388236 | 7.236510709 |
| 1.310717496 | 7.17113263  | 9.24862029  | 15.75058945 | 6.139397523 |
| 3.124088685 | 6.332088663 | 5.194115581 | 15.33540236 | 9.167328248 |
| 0           | 5.569486681 | 1.327213881 | 16.94870739 | 5.496907214 |
| 0           | 6.454177266 | 9.587962867 | 15.94504828 | 6.993392488 |
| 0.916363677 | 6.481653439 | 13.94794216 | 17.0804049  | 6.538685909 |

|             |             |             |             |             |
|-------------|-------------|-------------|-------------|-------------|
| 1.180478095 | 9.249713641 | 2.253788325 | 16.25861315 | 6.909192687 |
| 0           | 6.578368345 | 2.530413507 | 15.2779942  | 7.81667478  |
| 0.072231725 | 7.180341621 | 13.00003573 | 15.14219877 | 4.860241157 |
| 0.928937958 | 6.378673831 | 1.51769537  | 15.04813338 | 7.442155681 |
| 1.22598372  | 8.023145165 | 12.93935077 | 15.26491025 | 5.510878662 |
| 1.108952785 | 6.491348119 | 4.642417135 | 15.53463238 | 6.209712057 |
| 2.678586017 | 4.879448729 | 12.79504324 | 17.23974473 | 6.519101723 |
| 0           | 6.84755807  | 7.583363128 | 15.88973068 | 8.054815518 |
| 0.228798881 | 5.297112772 | 10.34323429 | 16.57751775 | 6.38075989  |
| 0.065311574 | 5.400906424 | 11.46172388 | 17.91087019 | 5.247848103 |
| 0.017170526 | 7.38496531  | 11.58086914 | 16.58227012 | 5.659371624 |
| 0.060843881 | 6.247151708 | 5.748957634 | 17.27046089 | 6.466728711 |
| 1.06951052  | 5.952675551 | 2.097595856 | 15.56167604 | 6.735115978 |
| 0.135805592 | 4.418111637 | 5.687107596 | 16.78154235 | 6.079916914 |
| 1.053255491 | 6.764809709 | 2.665910863 | 17.11592382 | 7.092550499 |
| 0.972975318 | 6.95259099  | 12.90170569 | 16.59444198 | 4.477381812 |
| 1.856966844 | 6.81473955  | 6.311362392 | 17.49202797 | 5.611338825 |
| 0.64731286  | 7.095684971 | 3.826935436 | 16.00841507 | 5.819883242 |
| 0           | 6.329207892 | 7.004959867 | 15.34024715 | 7.471367811 |
| 1.275255939 | 6.193845751 | 14.81350909 | 15.45346217 | 9.315511863 |
| 1.402417207 | 5.425027461 | 12.42049063 | 16.32105745 | 6.744847261 |
| 0           | 8.417323086 | 3.020293522 | 16.52113691 | 8.359464833 |
| 1.224723873 | 6.872210261 | 2.679603854 | 16.74992494 | 5.627666564 |
| 1.078361027 | 6.247073942 | 11.95265687 | 15.97921883 | 6.943549441 |
| 0.101895861 | 6.567985788 | 13.77824647 | 16.45367909 | 7.94495799  |
| 0           | 4.948334612 | 6.995801965 | 16.9587853  | 6.371083082 |
| 0.071571041 | 7.726853408 | 13.06541641 | 15.5832931  | 7.054178964 |
| 0.048935206 | 8.317195433 | 3.522243961 | 16.68518285 | 9.035772999 |
| 0.013399974 | 5.939505881 | 2.413008965 | 17.29548936 | 4.912623898 |
| 0.007744816 | 7.300770367 | 3.227186874 | 16.14566632 | 6.776546629 |
| 0           | 8.040914375 | 2.153581978 | 14.83520045 | 7.310573701 |
| 2.224186065 | 5.225876686 | 3.460143722 | 16.80879836 | 7.473783486 |
| 1.546259568 | 6.351775596 | 4.467440397 | 17.05429751 | 7.170983777 |
| 0.019885651 | 7.642203455 | 11.73771393 | 17.94499865 | 8.916963061 |
| 0.980321885 | 6.56547858  | 13.68550447 | 17.81679005 | 5.773084732 |
| 0.073105976 | 5.638988479 | 3.845971889 | 16.54271038 | 7.453057915 |
| 1.281063905 | 3.772438361 | 13.91977695 | 17.38557522 | 6.060240302 |
| 0.007787178 | 4.2304788   | 12.99514918 | 18.08564493 | 8.38027245  |
| 1.980303255 | 7.509593037 | 2.124083341 | 15.35746774 | 7.320015867 |
| 0           | 5.96706669  | 9.654505917 | 16.66542522 | 6.78623305  |
| 2.125493196 | 7.508503858 | 8.149796324 | 15.78241459 | 6.700814017 |
| 0.97529596  | 6.924398865 | 11.39956418 | 15.38315529 | 5.758884637 |
| 1.858041064 | 5.259442156 | 6.133365673 | 15.71319742 | 6.515130366 |
| 0.93620153  | 4.648543627 | 8.191688803 | 17.01714712 | 6.180439245 |
| 1.881333069 | 6.88491927  | 8.321330862 | 16.66974627 | 6.195401111 |
| 0.032991606 | 5.1131938   | 12.05454219 | 16.07961916 | 6.973684885 |
| 0.003395357 | 4.933853307 | 9.482944128 | 15.84951924 | 6.581998435 |
| 1.475540207 | 5.160395073 | 3.307390764 | 17.28651669 | 6.617845395 |
| 3.245088943 | 5.850952271 | 10.55928724 | 17.41317634 | 5.260471397 |
| 1.691443318 | 5.657087444 | 10.23123776 | 16.39668381 | 6.281930311 |
| 0.45974677  | 7.29732586  | 14.18999385 | 16.22871059 | 4.649199044 |
| 2.52840342  | 7.274794362 | 13.32040018 | 15.99939164 | 6.039403517 |
| 0           | 6.694047733 | 10.75670479 | 16.36687073 | 6.252685944 |
| 0.979986724 | 7.953537056 | 12.32825587 | 16.36338824 | 8.961973852 |
| 1.467441116 | 6.146769899 | 10.71024894 | 16.24784015 | 5.55353974  |
| 0           | 5.227904197 | 10.13318572 | 15.24912886 | 6.966947374 |
| 0.026361503 | 6.617467467 | 8.098189974 | 16.64517291 | 5.205499604 |
| 0.814161391 | 6.67686332  | 3.926984669 | 15.51094661 | 6.447161859 |



| hsa-miR-767-5p | hsa-miR-33b-5p | hsa-miR-105-5p | hsa-miR-1301-3p | hsa-miR-877-5p |
|----------------|----------------|----------------|-----------------|----------------|
| 1.33807016     | 3.483776974    | 0.113449862    | 5.095894065     | 3.646267976    |
| 0.072790879    | 3.652638021    | 0.072955492    | 7.569551071     | 4.235322103    |
| 1.109371935    | 3.487402603    | 0.034873607    | 4.419353143     | 2.740156437    |
| 0.018034688    | 2.892025462    | 1.057217455    | 6.263051084     | 4.547929878    |
| 1.364391196    | 1.369190409    | 0.122995254    | 5.249575179     | 2.023786979    |
| 2.208062345    | 5.45771102     | 1.157618427    | 5.773500055     | 2.208645988    |
| 0.166302628    | 7.090083906    | 0.16675227     | 4.150080928     | 2.158863182    |
| 0.021616356    | 4.500809449    | 1.068406954    | 5.016686083     | 3.688509219    |
| 1.496976871    | 4.690003095    | 2.220657221    | 5.051622269     | 2.480394021    |
| 1.765699336    | 5.140541242    | 1.148559445    | 6.302932298     | 5.718237042    |
| 0.59271597     | 3.280335031    | 1.708515739    | 6.633640782     | 4.662553951    |
| 0.235828997    | 7.374651091    | 0.23654484     | 4.934716269     | 2.35692595     |
| 2.434734624    | 3.481258428    | 0.112781749    | 4.502072409     | 0.10252814     |
| 0              | 6.079160606    | 0              | 6.525046556     | 5.181193794    |
| 1.565465185    | 4.258819399    | 0.199414136    | 6.559260714     | 3.761155936    |
| 0.042857767    | 3.905533172    | 1.133642137    | 6.705965332     | 2.774209923    |
| 9.634816052    | 2.289646329    | 10.63344113    | 6.398622346     | 4.140172454    |
| 5.033027076    | 4.140397976    | 5.325530647    | 3.620484143     | 1.318002828    |
| 4.074830008    | 5.777412279    | 5.431128743    | 4.377978415     | 3.157945483    |
| 3.763686456    | 4.800114438    | 5.003987969    | 6.060272545     | 3.222747986    |
| 7.276140997    | 2.21208089     | 6.892346709    | 4.564204329     | 2.661997061    |
| 3.024083441    | 2.553973236    | 0.307715909    | 3.669810071     | 2.540568216    |
| 0.028498487    | 5.75864427     | 0.028557001    | 4.0470347       | 2.119900462    |
| 6.255050571    | 4.227857517    | 6.862990399    | 4.904060144     | 2.566305845    |
| 0.150928574    | 4.094234866    | 2.563412176    | 5.299082683     | 2.561597359    |
| 0.701383915    | 6.15340803     | 0              | 5.941324169     | 2.337231502    |
| 1.559700498    | 4.054568813    | 2.968913915    | 7.340934469     | 4.66801318     |
| 2.253946045    | 5.055233614    | 3.282471574    | 3.086839795     | 2.254427057    |
| 1.264131829    | 5.898925292    | 1.263491067    | 5.577684072     | 2.343998347    |
| 0.040243442    | 3.777317873    | 1.737852413    | 5.87335294      | 2.763231813    |
| 5.558626604    | 2.460878202    | 5.679160819    | 4.89140277      | 3.492674899    |
| 0              | 3.169475955    | 0              | 5.425784687     | 2.806922675    |
| 0.551646668    | 2.799850882    | 1.360646986    | 7.173434838     | 0.540844349    |
| 0              | 4.681622908    | 0.765576141    | 5.519948856     | 4.360670323    |
| 0.098835242    | 3.428841599    | 0.09907089     | 6.459557699     | 4.13040141     |
| 9.493676515    | 3.624398277    | 9.30308267     | 5.869548687     | 3.314008647    |
| 0.130602261    | 4.02007888     | 0.130933263    | 6.285507672     | 3.864111984    |
| 0              | 3.868718085    | 1.360275174    | 6.097498917     | 4.559440736    |
| 0.085233744    | 4.786895737    | 0.085431493    | 6.183643781     | 2.337639862    |
| 1.669387584    | 4.501713512    | 0.021846125    | 5.433216611     | 2.683782983    |
| 0.102569026    | 3.443297606    | 0.102815384    | 5.86540071      | 4.353062969    |
| 0.066999023    | 5.319916015    | 1.205572855    | 4.314880202     | 3.621438236    |
| 0.130134628    | 3.721768231    | 1.383816759    | 5.161781461     | 3.106404817    |
| 0.060382723    | 3.077017785    | 0.060515749    | 5.65048117      | 3.975922907    |
| 0              | 1.913883823    | 0              | 6.251761769     | 5.183981917    |
| 1.899971674    | 8.015683484    | 2.696247311    | 5.942246486     | 2.216397933    |
| 9.040242513    | 3.246625609    | 9.232971769    | 7.167772834     | 5.003898501    |
| 2.715911767    | 5.06313948     | 2.251288165    | 3.961638868     | 0.178567399    |
| 0.11672843     | 4.913689065    | 0.117016607    | 3.968682476     | 0.106299666    |
| 0              | 1.816553748    | 1.419607221    | 6.566560677     | 4.105991982    |
| 2.011524766    | 7.336038136    | 0.002681254    | 5.473491389     | 3.598135155    |
| 1.160028975    | 4.721277418    | 1.529360281    | 5.731782306     | 3.671333       |
| 4.966255439    | 5.265464439    | 6.29243505     | 4.349236915     | 3.952010737    |
| 1.667882307    | 3.425459028    | 2.906952594    | 4.915941763     | 1.668992419    |
| 0.014372856    | 4.465183117    | 2.061004312    | 5.027994889     | 2.65073218     |
| 9.385761957    | 4.70176571     | 10.14984828    | 5.165592624     | 3.950108416    |

|             |             |             |             |             |
|-------------|-------------|-------------|-------------|-------------|
| 5.267379511 | 6.406118182 | 5.332920307 | 4.596692855 | 1.960018502 |
| 0.867527045 | 2.794212044 | 1.420836613 | 3.485758131 | 1.817690515 |
| 8.118325158 | 5.976541729 | 8.652312463 | 5.613377718 | 3.105953259 |
| 0           | 3.148471892 | 0.676003071 | 4.878902627 | 5.188993635 |
| 10.00459788 | 4.422630585 | 10.85480123 | 4.344673984 | 3.487556837 |
| 7.433219761 | 6.542165226 | 8.148873626 | 4.725075372 | 2.086663635 |
| 0           | 4.497254575 | 0           | 6.086835346 | 2.31815481  |
| 1.620986636 | 4.368793039 | 1.029346557 | 4.439360758 | 2.039533626 |
| 0.974680538 | 3.767148233 | 2.548061615 | 5.888865413 | 1.96570094  |
| 0.06713426  | 6.12986926  | 1.205969515 | 6.078798664 | 2.270914514 |
| 2.585542894 | 3.084805754 | 3.60791824  | 4.294271075 | 3.867411002 |
| 0           | 5.40304344  | 1.567560459 | 4.500582217 | 0           |
| 8.233868397 | 4.432128013 | 9.059188335 | 5.431638042 | 4.06105823  |
| 1.410340755 | 4.52382905  | 1.056620046 | 4.757905602 | 3.086952574 |
| 6.260606052 | 4.473459725 | 6.69260877  | 5.930603509 | 3.21701032  |
| 1.177557285 | 6.137101775 | 0.057491053 | 4.078453521 | 2.565045366 |
| 0.207262687 | 4.286391913 | 1.585172716 | 5.661072821 | 3.079115882 |
| 7.993741006 | 5.917473938 | 9.733578878 | 5.098004936 | 2.594325115 |
| 1.979810156 | 4.902552827 | 0.376822102 | 3.853066528 | 1.988498925 |
| 0.009464701 | 2.628974874 | 0.009483289 | 8.630889619 | 5.691297725 |
| 0.333073182 | 4.359172035 | 0.334240322 | 4.795005329 | 2.604954516 |
| 0.014803923 | 4.396815661 | 1.64255635  | 4.074371816 | 2.652667031 |
| 0.830542583 | 4.414819345 | 1.768215409 | 3.719493094 | 2.548469242 |
| 6.77921697  | 5.184934977 | 6.96364747  | 4.330795669 | 2.701898046 |
| 10.44987412 | 2.891300042 | 11.01941482 | 6.273525517 | 5.500653061 |
| 0           | 4.619740023 | 0           | 5.402548031 | 2.781325998 |
| 7.295717191 | 4.692927836 | 8.700660314 | 3.220993498 | 2.52805146  |
| 4.725606364 | 4.363358899 | 5.725185375 | 5.670853459 | 3.878961729 |
| 0           | 4.592333576 | 0           | 5.803748156 | 3.381254162 |
| 0.070296542 | 5.504794245 | 2.281874447 | 4.329080873 | 0.064524168 |
| 8.586346812 | 3.705601692 | 9.907677345 | 3.706885384 | 2.362956774 |
| 0.15400381  | 0.150440395 | 0.154411205 | 5.188837665 | 2.912513459 |
| 9.167000126 | 5.546175745 | 9.201468209 | 4.651113055 | 2.494988059 |
| 2.202103508 | 4.691474462 | 1.651386537 | 5.39035111  | 2.201119622 |
| 4.93728557  | 4.374802007 | 5.516628558 | 7.064942886 | 3.373230117 |
| 2.132006314 | 3.319613463 | 1.099363544 | 5.407036055 | 2.726524189 |
| 0           | 4.591420192 | 0           | 3.120267003 | 0.966953769 |
| 1.004797799 | 4.651594665 | 0.00149392  | 5.467279117 | 2.591901713 |
| 0.069893788 | 5.948961317 | 0.070050896 | 6.966650731 | 3.899006247 |
| 0           | 4.618944903 | 1.44494438  | 6.234303286 | 3.627468545 |
| 0           | 3.550209365 | 0           | 6.681211216 | 3.352385801 |
| 0.966416461 | 5.645083324 | 0           | 3.946140613 | 0.965567093 |
| 3.786142819 | 3.31878735  | 4.658446849 | 4.98205646  | 4.021254463 |
| 0.388618513 | 4.122175215 | 0.390085461 | 4.510181463 | 3.555517887 |
| 0           | 6.653180527 | 1.409194647 | 4.761002866 | 2.117080486 |
| 8.000588735 | 4.325127698 | 7.974651056 | 4.908314357 | 2.204858163 |
| 0.864630259 | 2.600359459 | 0.864907194 | 5.652478275 | 2.383742059 |
| 0.427654057 | 3.304111758 | 0           | 6.312689912 | 3.561101608 |
| 1.687139509 | 5.419272118 | 0.026557151 | 4.888282467 | 2.111754926 |
| 0.004826721 | 2.607536676 | 0.004836095 | 5.112634527 | 2.607326524 |
| 7.065866189 | 3.459336722 | 7.180600771 | 5.354269042 | 2.447584105 |
| 6.076581148 | 4.611600075 | 5.879496877 | 5.353697957 | 2.686675314 |
| 1.792247377 | 5.622980923 | 3.197267339 | 5.544468894 | 2.732567202 |
| 0.114568765 | 5.099497271 | 1.34109945  | 5.101404005 | 3.051515764 |
| 0           | 4.553588468 | 0.376677786 | 5.697048245 | 2.98032212  |
| 0           | 2.986446665 | 0           | 4.040749358 | 2.675132425 |
| 0           | 4.706406213 | 0           | 6.070813328 | 2.919623231 |
| 5.377082078 | 2.675099808 | 5.313051273 | 6.119880679 | 2.676358132 |

|             |             |             |             |             |
|-------------|-------------|-------------|-------------|-------------|
| 1.194839974 | 6.086418675 | 1.194378744 | 4.386548095 | 2.857343498 |
| 0           | 4.00670981  | 0           | 5.698162855 | 3.963806334 |
| 10.00825    | 2.806372645 | 10.56645537 | 5.124714036 | 3.072702826 |
| 0           | 4.946019034 | 0           | 6.398471982 | 3.288238372 |
| 3.824655698 | 3.824394175 | 3.157841927 | 5.18612368  | 5.65020749  |
| 0.037118713 | 5.271877103 | 0.037196429 | 4.504544695 | 2.154679723 |
| 1.077989061 | 6.12540172  | 0.02469114  | 3.705247634 | 1.681383067 |
| 1.01044424  | 3.435669353 | 1.359584388 | 5.866996484 | 2.805224666 |
| 7.250128174 | 4.105119676 | 6.843113455 | 4.736251234 | 0.412351505 |
| 0.107960284 | 2.421745862 | 1.972076561 | 2.76063076  | 2.418177489 |
| 10.785739   | 4.038018151 | 10.17237116 | 2.931062016 | 0.024638954 |
| 0.099973494 | 5.100690441 | 0.100212393 | 4.848777443 | 3.597048575 |
| 0.023333942 | 5.510817594 | 0.023381287 | 6.141865884 | 3.108683644 |
| 3.938589871 | 0.241043263 | 4.274671624 | 5.145217395 | 1.697674443 |
| 8.396515816 | 6.791977027 | 8.796774732 | 4.948655485 | 2.07567655  |
| 3.415041557 | 6.061671668 | 4.27600574  | 4.708529946 | 2.281714357 |
| 0.085211738 | 3.703668864 | 1.258390234 | 4.197085628 | 2.672164399 |
| 4.400385013 | 6.277609815 | 4.601525451 | 4.994389923 | 3.701178564 |
| 1.563978717 | 3.673495927 | 0.982968206 | 5.994180732 | 2.974425219 |
| 3.903521511 | 3.235467071 | 5.215775293 | 7.933686478 | 3.424192707 |
| 0.154111827 | 3.432743483 | 0.154519586 | 4.985266614 | 3.418191911 |
| 0.553334931 | 4.811105097 | 0           | 6.275484544 | 4.319193968 |
| 0           | 5.548578831 | 1.578526835 | 4.749575786 | 3.398559015 |
| 0           | 2.47258414  | 0.586311482 | 5.209179634 | 4.118230916 |
| 0.177102504 | 4.044497671 | 2.18762921  | 5.796949325 | 2.190942369 |
| 0           | 4.774488187 | 0           | 5.211072427 | 1.852103476 |
| 0.119311471 | 5.289144066 | 0.119607482 | 6.29620728  | 2.795260585 |
| 1.241498715 | 7.318200544 | 1.240917413 | 7.83748637  | 3.343740537 |
| 0.020692211 | 3.686394672 | 1.065525208 | 4.628089004 | 2.90290235  |
| 0.011873624 | 5.148563267 | 1.037836818 | 5.061222901 | 2.050910665 |
| 1.605095882 | 4.78674518  | 1.904461931 | 5.817094294 | 4.684116361 |
| 1.487594299 | 4.624978909 | 0.921364646 | 4.570366374 | 2.880335601 |
| 0.965460222 | 4.403418604 | 0           | 4.528677064 | 1.541796707 |
| 0.030963826 | 4.545764835 | 1.097347938 | 4.909797288 | 3.142776305 |
| 0           | 5.392339098 | 1.972230672 | 4.551348863 | 2.292659125 |
| 0.122124142 | 4.709891145 | 0.122428756 | 5.593687519 | 2.466672793 |
| 8.880286567 | 3.912282572 | 8.699172143 | 4.040837489 | 1.957666165 |
| 0.011939213 | 2.375672064 | 0.0119628   | 3.380418491 | 3.056471977 |
| 0           | 4.132120242 | 0           | 5.762743011 | 3.639968573 |
| 7.356602948 | 5.321438689 | 7.962483568 | 5.968875526 | 3.379419533 |
| 8.713203911 | 6.634885539 | 9.800283033 | 2.146043996 | 3.622952702 |
| 11.03093952 | 2.171112092 | 10.90970939 | 6.589213829 | 4.379624133 |
| 1.260101364 | 6.424625221 | 0.085787545 | 4.718625558 | 3.835224694 |
| 0           | 4.812764616 | 0           | 4.56146333  | 2.118292357 |
| 0.093852428 | 5.757003248 | 0.094073988 | 4.823818235 | 3.400732808 |
| 1.781736105 | 2.546761522 | 2.545150433 | 3.947947454 | 3.559892278 |
| 7.993290481 | 2.345418002 | 8.63118016  | 4.670647157 | 2.345277586 |
| 0           | 4.884220996 | 0           | 4.090038718 | 1.868191378 |
| 1.554079476 | 4.790732312 | 1.554795053 | 4.389972502 | 1.548399157 |
| 0.755537316 | 5.033789912 | 0.756007356 | 5.216229864 | 2.614118117 |
| 9.660390961 | 6.470964954 | 11.12953683 | 6.742925375 | 4.298460305 |
| 9.980433736 | 4.363286014 | 10.27605448 | 4.181872991 | 3.723142645 |
| 0           | 3.502629463 | 0.948083408 | 5.083947769 | 0           |
| 0.978955331 | 4.773111586 | 0.979000899 | 6.565033704 | 3.289823942 |
| 8.224621725 | 4.583615405 | 8.843066508 | 5.954907026 | 1.858512732 |
| 8.760572072 | 3.946033334 | 8.711005045 | 5.403912134 | 2.972562013 |
| 8.168989679 | 4.788011053 | 8.909810639 | 3.517269272 | 2.17167986  |
| 8.571286402 | 2.510745173 | 9.195326246 | 5.526830981 | 3.85545239  |

| hsa-miR-452-3p | hsa-miR-144-3p | hsa-miR-34a-5p | hsa-miR-188-5p | hsa-miR-542-5p |
|----------------|----------------|----------------|----------------|----------------|
| 5.096180732    | 6.071886897    | 11.07075266    | 4.748387188    | 4.064378781    |
| 5.595504962    | 3.498256291    | 7.59166015     | 2.6281206      | 1.856422666    |
| 6.263073314    | 7.395595374    | 10.87941591    | 3.625042771    | 3.330169136    |
| 5.221672134    | 5.414587039    | 11.0552117     | 4.337837387    | 2.401723173    |
| 3.320594808    | 4.119773918    | 10.2781029     | 2.812900714    | 3.504181531    |
| 5.642134899    | 5.535142112    | 11.78406599    | 3.823061754    | 2.538108308    |
| 4.702663413    | 4.791996658    | 11.74991576    | 4.863732693    | 0.1479241      |
| 5.239468209    | 4.278118911    | 10.93604076    | 4.106603843    | 3.803758387    |
| 6.538506842    | 4.467775105    | 9.772243959    | 1.902581896    | 3.061269204    |
| 6.979089402    | 6.366614694    | 7.347857553    | 4.753507725    | 1.767506481    |
| 3.280291383    | 2.148501189    | 8.91575891     | 3.967661213    | 4.086137136    |
| 3.181748624    | 4.935927213    | 10.94722991    | 4.366728197    | 3.434622612    |
| 6.158294699    | 5.973694185    | 12.02300286    | 1.992682691    | 1.98978675     |
| 7.953348851    | 3.672245612    | 8.947387973    | 5.853657898    | 1.56272597     |
| 7.389061647    | 2.718536196    | 10.75122474    | 2.259407589    | 1.574930151    |
| 3.370097648    | 4.378551541    | 10.06553842    | 4.205401873    | 3.193640808    |
| 4.792851144    | 4.934087881    | 8.941185586    | 4.129740648    | 3.636485308    |
| 3.757616411    | 6.275163476    | 9.425689442    | 2.625574217    | 4.626392161    |
| 5.430082368    | 3.957816173    | 10.82479626    | 2.934570978    | 4.061444565    |
| 2.420659067    | 4.145863801    | 9.886493025    | 3.520227261    | 2.410212358    |
| 8.373268589    | 5.680367665    | 11.95169263    | 5.074395417    | 3.001260616    |
| 6.924242375    | 3.027344351    | 11.69924859    | 3.376444084    | 0.265620859    |
| 7.345241419    | 6.803752378    | 12.5939742     | 4.462154913    | 2.712543771    |
| 5.245416773    | 5.183850659    | 11.12994073    | 3.622303567    | 2.563807773    |
| 3.421991016    | 4.553010384    | 9.242386213    | 4.333903268    | 2.899405903    |
| 3.731895516    | 7.422514372    | 8.557219901    | 3.399745442    | 3.204862495    |
| 4.966371491    | 4.490216472    | 8.605817609    | 4.96680938     | 1.972249084    |
| 5.661309282    | 9.592334548    | 10.60307852    | 4.099114637    | 3.276535675    |
| 3.978942825    | 5.801570885    | 10.47181238    | 4.644510035    | 2.342800294    |
| 5.006483591    | 6.523928856    | 11.13446185    | 5.196673418    | 1.739778443    |
| 6.691834721    | 5.695035578    | 10.37870924    | 4.204423169    | 3.199480414    |
| 2.321513356    | 7.189339361    | 10.41736285    | 4.32146149     | 3.806904385    |
| 6.535348091    | 1.637807455    | 11.62455451    | 3.580620794    | 3.119467521    |
| 6.245400823    | 3.513114255    | 11.35712123    | 5.267539586    | 3.521594196    |
| 5.313526792    | 2.388075387    | 11.3578099     | 3.426466202    | 1.944913652    |
| 5.75820487     | 2.509935406    | 10.68729862    | 3.33384355     | 0.252742932    |
| 2.841441753    | 4.898482473    | 10.24431123    | 3.719476009    | 2.83174218     |
| 5.838128781    | 3.786730902    | 10.90127218    | 5.52628067     | 1.356097408    |
| 3.375392842    | 5.206439154    | 12.74226153    | 3.840788501    | 2.670761906    |
| 7.112376711    | 4.968715479    | 11.94136708    | 4.693731636    | 3.562824518    |
| 7.724753197    | 4.26772298     | 11.94844596    | 5.592919352    | 3.234219455    |
| 1.20755566     | 4.904407306    | 11.03355748    | 4.560923904    | 3.097921837    |
| 2.839801194    | 3.115943411    | 11.25251248    | 1.392444421    | 2.491532368    |
| 5.578318442    | 3.98375319     | 10.31833631    | 3.272098074    | 3.438894123    |
| 3.706018175    | 3.071971157    | 10.06771916    | 3.706682867    | 4.070405997    |
| 6.886821674    | 7.682652238    | 9.145837982    | 3.881256722    | 1.899340048    |
| 1.489025072    | 2.621084649    | 9.89756158     | 5.022309327    | 1.494296327    |
| 5.408632361    | 5.067581979    | 11.77371306    | 3.34385872     | 2.251360777    |
| 4.32319928     | 5.699598877    | 11.43349314    | 3.065907834    | 2.784040439    |
| 5.838873546    | 3.245800783    | 7.498148834    | 3.951318605    | 1.416657435    |
| 7.047607995    | 3.713961323    | 11.56556657    | 4.10105077     | 3.182808104    |
| 5.866863705    | 3.802583155    | 10.12576085    | 5.23404212     | 3.515862853    |
| 7.609785401    | 4.261254649    | 11.54258161    | 3.24831782     | 0.049753483    |
| 6.132365769    | 4.693204126    | 10.99806685    | 3.912366214    | 3.422966886    |
| 2.875083193    | 4.717332174    | 11.25498711    | 4.394064702    | 3.237978641    |
| 5.338054737    | 6.59561045     | 9.698685913    | 4.08090834     | 2.246723537    |

|             |             |             |             |             |
|-------------|-------------|-------------|-------------|-------------|
| 5.588531167 | 6.754193148 | 10.37272711 | 2.901815937 | 3.398512988 |
| 7.130949614 | 3.591669507 | 11.23112413 | 4.779662705 | 2.607270595 |
| 4.398738024 | 8.657045383 | 9.963123331 | 3.674662551 | 3.107761048 |
| 4.551487434 | 5.145061987 | 8.265393388 | 4.748158643 | 1.83675154  |
| 5.733322049 | 5.46380368  | 10.33290903 | 2.149302096 | 2.476037445 |
| 5.652706013 | 5.00907887  | 8.720716125 | 3.063338715 | 3.547504953 |
| 1.191929727 | 3.710710928 | 11.07130734 | 3.713740685 | 3.478518171 |
| 5.53972834  | 8.031361127 | 10.87213996 | 3.214536589 | 2.039441008 |
| 1.55363672  | 2.769485591 | 10.23242678 | 3.545324686 | 3.66141859  |
| 3.104819626 | 3.301542521 | 10.64224757 | 4.706675338 | 3.759114154 |
| 5.586701085 | 3.747948077 | 9.952895149 | 2.58675193  | 4.189723498 |
| 4.561945382 | 9.466261374 | 11.19841885 | 1.980749041 | 3.300423234 |
| 6.658480863 | 4.92655234  | 10.63876727 | 4.926921448 | 2.782448855 |
| 5.898646047 | 4.3681519   | 10.41240845 | 3.777857375 | 4.304794892 |
| 2.484619071 | 3.890030722 | 9.374385118 | 3.06465524  | 2.706036876 |
| 1.178834234 | 4.735525415 | 12.03488156 | 5.028226905 | 0.05211397  |
| 2.744666853 | 6.769306674 | 12.57237891 | 0.19596111  | 3.582409183 |
| 4.710921055 | 5.295981969 | 10.0674314  | 2.008763869 | 1.006640069 |
| 1.987529864 | 5.338693723 | 10.25633593 | 3.197926573 | 3.165153175 |
| 6.219442486 | 2.364536242 | 10.62100353 | 4.507394995 | 3.044720333 |
| 2.618715161 | 5.552961136 | 10.94871982 | 3.728979292 | 3.413581215 |
| 4.830644158 | 6.121262296 | 12.16936479 | 3.531775931 | 3.530337449 |
| 5.35352445  | 3.185966963 | 11.2046524  | 4.177258083 | 2.549269067 |
| 3.73646733  | 6.60750082  | 10.8746939  | 4.117095561 | 3.396103288 |
| 1.4969901   | 3.972536113 | 10.45137301 | 4.639333256 | 0.92732275  |
| 5.218469467 | 4.847586445 | 9.893799228 | 3.576973519 | 3.859573826 |
| 6.169098424 | 4.879041073 | 9.029610199 | 4.478251101 | 3.020954143 |
| 6.555210112 | 2.780538834 | 11.99017179 | 1.975626351 | 4.059578547 |
| 7.349890314 | 6.028709925 | 9.461085908 | 3.959393801 | 3.881649878 |
| 6.548350588 | 3.90947408  | 8.279436982 | 4.49649311  | 0.06370011  |
| 2.368110919 | 5.342528523 | 10.45679701 | 2.370537442 | 0.208869423 |
| 6.719135245 | 4.985669515 | 12.50425057 | 4.453398073 | 1.457698421 |
| 6.841796247 | 5.480092088 | 10.03922906 | 4.768158602 | 2.100394715 |
| 1.26710245  | 9.914655248 | 11.35980768 | 4.774674805 | 2.416126358 |
| 5.010260842 | 3.361627675 | 10.20497398 | 4.519445454 | 1.572636833 |
| 2.72796417  | 5.914944591 | 11.93156735 | 3.852908979 | 3.469095681 |
| 4.195847745 | 4.805172233 | 9.811506402 | 2.759091527 | 4.119598067 |
| 5.562447865 | 4.095117297 | 10.31974966 | 3.707934425 | 3.329169298 |
| 5.032994755 | 3.31297392  | 10.35151881 | 3.311492403 | 2.612855583 |
| 9.124544485 | 2.416789046 | 9.62095379  | 3.279679945 | 1.442494757 |
| 3.110411322 | 4.490874504 | 9.276701715 | 4.920006988 | 2.665787716 |
| 5.5591622   | 4.989186133 | 9.417198297 | 3.269896999 | 3.755331044 |
| 5.589027381 | 7.286983749 | 11.2137903  | 2.288449287 | 1.851246901 |
| 5.461418552 | 4.332118175 | 11.49314003 | 4.308700853 | 3.545263655 |
| 7.183138349 | 6.149786264 | 9.685383043 | 3.471361359 | 0.854535061 |
| 5.185280471 | 5.289374194 | 11.08624143 | 3.042839222 | 3.332535282 |
| 4.900887705 | 2.600754737 | 10.09585579 | 3.948071294 | 3.246821503 |
| 5.389745723 | 2.543091485 | 10.09812183 | 3.307179338 | 3.774340402 |
| 4.888340056 | 4.131119456 | 10.72965145 | 3.448640318 | 3.122346361 |
| 5.41759312  | 3.609154138 | 10.51963016 | 3.831589699 | 3.345255118 |
| 5.668919436 | 4.141465176 | 10.31413968 | 4.388787292 | 4.136646516 |
| 6.337365691 | 6.819945275 | 10.34471502 | 4.305663446 | 3.841822129 |
| 6.459845066 | 4.682203098 | 11.20857405 | 5.532345237 | 3.480237889 |
| 6.356130869 | 5.564802666 | 9.906247722 | 3.058033162 | 3.04906754  |
| 6.657103354 | 4.525588375 | 10.03464741 | 4.083675775 | 3.129176026 |
| 4.502458938 | 4.963547276 | 10.32024658 | 4.10999017  | 4.180936203 |
| 2.635940821 | 3.952418456 | 9.636786169 | 4.673558159 | 3.767387256 |
| 2.865740174 | 4.761849915 | 9.103814292 | 3.859328666 | 2.197333124 |

|             |             |             |             |             |
|-------------|-------------|-------------|-------------|-------------|
| 6.629446127 | 5.732383107 | 12.07027956 | 5.053733997 | 2.856122382 |
| 6.524184387 | 3.563009158 | 10.59917504 | 4.165848464 | 4.076711397 |
| 5.866812134 | 2.015780095 | 11.4622912  | 3.309887191 | 1.36593987  |
| 6.100096629 | 4.896536234 | 11.0103703  | 2.260902567 | 3.051914942 |
| 5.02187008  | 4.768747914 | 10.73410146 | 5.989620496 | 3.347325955 |
| 4.351898681 | 3.98729572  | 10.52362903 | 3.635543665 | 3.981419688 |
| 5.295065661 | 4.824770599 | 12.23872414 | 3.578265897 | 3.28495251  |
| 2.680156754 | 5.087732129 | 9.742470767 | 4.419884911 | 1.86966367  |
| 0.472767713 | 4.352065405 | 10.25661468 | 3.44171042  | 2.922694714 |
| 7.856378249 | 5.192170789 | 11.15649489 | 4.174894834 | 2.753221399 |
| 6.475972858 | 5.527677621 | 9.171202807 | 3.713756756 | 2.704518624 |
| 3.433492128 | 5.820666326 | 11.44021181 | 3.233214397 | 2.724676625 |
| 5.73395893  | 2.425311213 | 9.96049659  | 4.639612122 | 4.360463346 |
| 3.217048855 | 3.736349276 | 10.35237947 | 2.397075025 | 4.37043448  |
| 3.255543523 | 4.411698738 | 10.85384977 | 4.947469292 | 1.057928936 |
| 3.126219165 | 5.596907994 | 9.707165465 | 1.549513376 | 2.543775899 |
| 3.177645224 | 10.17007699 | 8.970692069 | 1.264233711 | 2.336393206 |
| 5.413644146 | 4.874601736 | 10.29371545 | 2.853737701 | 4.07782542  |
| 5.779190635 | 4.220434911 | 10.46523745 | 5.016827504 | 3.144218165 |
| 6.891982741 | 4.149091018 | 11.79381194 | 4.027023776 | 1.948942081 |
| 3.633443495 | 3.200091457 | 11.87814993 | 3.803176252 | 3.612432252 |
| 5.666381435 | 3.645763627 | 9.912683406 | 4.953573184 | 3.213282595 |
| 6.185127683 | 3.567407766 | 10.10752277 | 4.894961847 | 3.736842629 |
| 4.523808378 | 5.687702968 | 9.963528288 | 4.455247269 | 4.508188645 |
| 4.046149389 | 4.993059288 | 11.96484157 | 3.881619    | 2.188785615 |
| 3.992972876 | 3.824047779 | 10.7029071  | 4.821774188 | 3.915921107 |
| 1.357742227 | 4.106878051 | 10.68617806 | 4.771906494 | 3.492128612 |
| 6.104378082 | 5.802201494 | 10.95623737 | 4.612149082 | 3.341839947 |
| 4.3518183   | 4.190910637 | 11.03281215 | 3.421618975 | 2.67852569  |
| 5.646621038 | 4.520106169 | 10.35966609 | 4.146957655 | 3.378733069 |
| 7.558350395 | 5.169792283 | 9.867583291 | 5.546807484 | 3.844571042 |
| 5.190535353 | 5.29463848  | 11.85234268 | 4.194142162 | 2.469504473 |
| 6.896654264 | 4.643983563 | 10.40229772 | 3.945033138 | 3.117698807 |
| 5.582589508 | 8.196866672 | 11.81932381 | 3.733788761 | 0.028275267 |
| 6.155567096 | 5.747167322 | 12.17988821 | 4.551714903 | 3.29051218  |
| 6.662306707 | 6.91249971  | 11.53621548 | 3.514117044 | 2.464813075 |
| 5.169443888 | 5.720478081 | 11.34968016 | 3.613901067 | 2.397312041 |
| 2.863786153 | 5.920154867 | 12.81862536 | 3.22765919  | 1.632217954 |
| 4.308598352 | 1.678219978 | 9.704818668 | 5.428210555 | 3.071994293 |
| 5.799220564 | 4.669002973 | 10.4074319  | 5.10571268  | 2.855168302 |
| 8.306206323 | 5.699186597 | 10.64524449 | 4.756009251 | 2.473265442 |
| 5.746957957 | 5.853795854 | 8.486839196 | 3.792243233 | 3.435865171 |
| 6.404595787 | 6.23752857  | 9.223963493 | 5.482221642 | 2.337751763 |
| 5.456417927 | 5.814386129 | 11.49974536 | 3.883901703 | 4.357178086 |
| 2.370473257 | 5.864377166 | 11.65652901 | 4.672312748 | 2.36727245  |
| 5.541506712 | 7.718288174 | 10.28081699 | 2.815577593 | 3.939856948 |
| 5.885184838 | 1.016704743 | 10.18875856 | 2.832006618 | 3.484574896 |
| 5.987305572 | 5.720380256 | 10.23404063 | 3.546511939 | 3.022210376 |
| 4.95404573  | 8.951632463 | 9.484808824 | 3.362578637 | 3.370765358 |
| 4.576036226 | 3.831735881 | 9.911816276 | 4.388824678 | 4.54396125  |
| 6.04577951  | 1.478893156 | 9.20190114  | 3.30954769  | 2.498081722 |
| 4.738427842 | 2.839678923 | 9.795755902 | 3.434686866 | 1.804449511 |
| 4.499807372 | 2.920546472 | 11.01068976 | 3.377950732 | 3.726384071 |
| 7.679258681 | 3.426534656 | 9.448514549 | 4.666563635 | 1.55872526  |
| 4.00070983  | 3.918684538 | 10.49458937 | 4.223574666 | 4.083374946 |
| 6.629345656 | 5.379662828 | 9.66041173  | 4.293132284 | 2.343235581 |
| 4.788677544 | 6.962645367 | 10.27197104 | 3.516074962 | 1.132644928 |
| 5.224236438 | 2.295946001 | 10.24445474 | 3.769185823 | 4.328339393 |

| hsa-miR-195-5p | hsa-miR-1266-5p | hsa-miR-326 | hsa-miR-891a-5p | hsa-miR-335-5p |
|----------------|-----------------|-------------|-----------------|----------------|
| 8.362439901    | 4.082193213     | 4.078424742 | 2.438228331     | 4.504393229    |
| 7.185135235    | 4.144526416     | 2.294083559 | 0.07245287      | 3.919850596    |
| 6.033941151    | 3.162369987     | 4.814765177 | 5.532481466     | 3.626143742    |
| 6.000241271    | 6.092699263     | 4.089488981 | 1.655276672     | 6.09295079     |
| 7.34151066     | 3.089501714     | 3.087873012 | 4.542210867     | 6.226060935    |
| 8.926013953    | 5.335534427     | 4.147682882 | 5.106511374     | 6.460133958    |
| 5.414436569    | 3.850958336     | 3.670851594 | 1.483582763     | 4.149779965    |
| 7.704565437    | 4.014021401     | 3.564197817 | 3.914269648     | 5.358121303    |
| 8.30981808     | 3.471721058     | 2.699818489 | 0               | 5.763597251    |
| 6.46697182     | 6.36522539      | 5.624640413 | 0.047591424     | 3.928057414    |
| 4.50133597     | 2.146838384     | 2.881364793 | 0.591487967     | 4.212513127    |
| 7.151419349    | 3.699023422     | 4.825383105 | 0.234362845     | 4.379462326    |
| 8.543006093    | 2.437653382     | 5.086112143 | 2.435905162     | 6.321226803    |
| 6.493893157    | 6.328142288     | 5.01553193  | 0               | 5.328265792    |
| 5.283876453    | 6.285389761     | 3.577928864 | 0.19768077      | 4.718833947    |
| 6.323282779    | 5.459676315     | 1.749927955 | 1.134477924     | 4.854386805    |
| 4.12430699     | 1.90758419      | 6.274659328 | 1.673574342     | 4.701310635    |
| 9.295193824    | 3.469252797     | 5.338394627 | 0.371840602     | 7.236225038    |
| 7.892147214    | 4.465515521     | 3.827488443 | 1.886406238     | 5.026879123    |
| 6.641175507    | 5.591364389     | 3.24034733  | 0.255528901     | 5.089433198    |
| 5.581752497    | 1.531698141     | 3.902294144 | 4.565196749     | 4.563704411    |
| 3.381794992    | 3.668503797     | 2.553211401 | 4.112115216     | 3.669586546    |
| 7.004097135    | 2.714479656     | 2.714346344 | 2.447344253     | 4.534288245    |
| 6.842514457    | 4.099682299     | 3.62303712  | 0.15157104      | 4.903543684    |
| 8.299066882    | 3.189414817     | 3.948736312 | 1.442737613     | 4.97312386     |
| 7.023661705    | 5.197729592     | 7.998503742 | 4.792594837     | 6.644530162    |
| 4.054520793    | 5.251755708     | 3.774929921 | 3.774731689     | 5.053828956    |
| 8.700654835    | 5.000681906     | 5.34272105  | 1.194340504     | 6.304563406    |
| 6.888994153    | 4.304430063     | 3.380627774 | 1.265209734     | 2.95557443     |
| 6.645673569    | 3.777356037     | 3.357695247 | 4.283599341     | 4.657105417    |
| 7.650652816    | 3.724261622     | 3.10380494  | 0.948126715     | 6.777039066    |
| 6.339364868    | 3.999533678     | 3.458977095 | 3.806891204     | 5.208974795    |
| 6.876240707    | 6.013928091     | 4.974804651 | 1.873369743     | 6.096517327    |
| 8.107466808    | 2.940039612     | 3.311545291 | 2.228484835     | 4.984016326    |
| 5.744607696    | 4.02600634      | 1.303659567 | 3.000368007     | 4.143861452    |
| 4.245494464    | 6.241381096     | 0.274308978 | 4.907055487     | 5.005772237    |
| 6.110811231    | 4.020240382     | 3.346932258 | 0.129923193     | 5.036357853    |
| 3.167772447    | 4.647416854     | 2.716899353 | 2.059776684     | 5.444588618    |
| 6.237193006    | 4.641532898     | 2.340224662 | 6.896712919     | 5.986306338    |
| 6.452423919    | 4.569017826     | 3.426901618 | 3.427323724     | 5.320517884    |
| 5.93480686     | 4.550149615     | 2.74070956  | 0.102063391     | 4.787894219    |
| 6.182950208    | 4.011799405     | 3.626792304 | 0.066691633     | 4.710065377    |
| 6.873677586    | 4.372997786     | 3.543944179 | 0.129458578     | 5.161281308    |
| 6.739268458    | 4.747987891     | 1.190158105 | 1.811487011     | 5.577862056    |
| 5.649165233    | 5.480025198     | 1.505825595 | 0               | 4.145103028    |
| 9.75273645     | 4.463597917     | 4.272269593 | 2.475977602     | 5.400336302    |
| 5.0361659      | 6.003074516     | 4.007134947 | 2.967055913     | 3.856701348    |
| 5.736910696    | 2.72004244      | 2.718971919 | 1.567863176     | 5.140816146    |
| 6.288692346    | 3.298489056     | 4.976071918 | 4.097005238     | 3.497508476    |
| 4.027177826    | 4.730307683     | 5.504153424 | 0               | 4.819838721    |
| 6.782416798    | 6.932974107     | 3.598344364 | 1.595551713     | 4.598838437    |
| 7.981735612    | 3.869051978     | 2.45387255  | 1.158778388     | 4.68409135     |
| 4.167318665    | 5.551768045     | 5.069656953 | 6.809273307     | 5.51486872     |
| 6.586397372    | 3.425470975     | 4.01233624  | 1.068162769     | 4.499980749    |
| 7.245169802    | 3.771841547     | 4.596060697 | 0.014314165     | 2.87511865     |
| 4.141435255    | 3.942357207     | 2.95943684  | 6.796130623     | 3.624241722    |

|             |             |             |             |             |
|-------------|-------------|-------------|-------------|-------------|
| 8.066155925 | 3.985032495 | 4.566131808 | 1.436473228 | 6.893150075 |
| 5.389596537 | 3.869680948 | 2.794466171 | 2.794624463 | 4.777305541 |
| 7.213448981 | 4.660396339 | 4.449652107 | 2.351467035 | 2.534628972 |
| 5.698759873 | 7.195313001 | 4.851181477 | 1.544163336 | 5.460709552 |
| 7.075524755 | 4.6349922   | 2.970526541 | 2.744961021 | 4.635289373 |
| 7.888658902 | 6.516277973 | 4.535781188 | 1.777393241 | 5.580464762 |
| 8.081913619 | 5.468872307 | 5.334188539 | 1.861947581 | 4.735313478 |
| 6.663097123 | 2.850988486 | 3.630507317 | 4.80233931  | 5.539660938 |
| 6.876612135 | 5.206426909 | 4.207419007 | 0           | 6.350384446 |
| 7.762270125 | 3.768437811 | 4.774610362 | 1.835344751 | 5.5316318   |
| 6.494236943 | 3.874676248 | 3.084013634 | 0.061974618 | 4.6184645   |
| 7.889225108 | 1.980798844 | 4.369610333 | 0.985760935 | 6.042694669 |
| 5.753396299 | 4.432119736 | 5.101917753 | 3.558398125 | 3.879970431 |
| 6.647970292 | 4.759238383 | 3.176304123 | 0           | 6.121211014 |
| 6.424614033 | 4.211058183 | 5.64279867  | 0           | 6.409613706 |
| 4.921218492 | 3.853484565 | 3.585990464 | 4.272960674 | 1.801639937 |
| 7.260177473 | 3.609779736 | 2.744537978 | 2.279370529 | 5.24034858  |
| 6.595671446 | 6.868605766 | 5.367994077 | 1.006499683 | 4.765369407 |
| 5.342044966 | 4.630651291 | 6.489811308 | 0.372582761 | 5.508167949 |
| 6.026900106 | 6.297240289 | 2.364679488 | 1.030394551 | 5.508626253 |
| 6.334208358 | 3.455024449 | 2.619695695 | 0.330686529 | 5.309917814 |
| 7.601078464 | 3.070812875 | 3.531841254 | 1.047360769 | 3.981012603 |
| 5.93637659  | 5.202840158 | 3.186595759 | 2.547210186 | 5.202303613 |
| 8.21584423  | 3.407019703 | 5.009703978 | 2.705520212 | 4.888657858 |
| 4.20620231  | 6.148477579 | 3.211212475 | 6.869319428 | 7.100212692 |
| 7.904937689 | 3.0959775   | 4.464448204 | 0.857538401 | 4.969483913 |
| 9.35217414  | 5.093074096 | 6.015603646 | 0.047914525 | 6.925096657 |
| 6.057686596 | 5.947736939 | 4.293208819 | 5.058024953 | 5.525063333 |
| 6.521172237 | 4.309692976 | 1.822721886 | 0           | 4.108899544 |
| 7.055335516 | 4.855789629 | 4.413942056 | 0.069971799 | 4.500332232 |
| 7.309180172 | 5.26570348  | 4.503791283 | 3.706789568 | 7.188966137 |
| 6.134847354 | 2.123863449 | 2.125042905 | 3.432402572 | 3.808636911 |
| 6.277260038 | 4.652091836 | 5.611911232 | 2.493149609 | 4.201579662 |
| 6.308260325 | 4.7710029   | 4.734827371 | 3.891075136 | 5.390644879 |
| 7.127647137 | 6.508939143 | 2.005480046 | 4.136402892 | 4.755414454 |
| 7.127263926 | 2.4610746   | 3.319066235 | 7.39003496  | 5.481025932 |
| 8.37222994  | 3.75608624  | 5.0351118   | 0           | 6.11650757  |
| 7.920855982 | 2.814503256 | 3.592431064 | 3.707984967 | 4.91467924  |
| 7.939942627 | 7.770660021 | 3.638877318 | 1.845018978 | 5.656559987 |
| 6.479479566 | 6.094213699 | 3.624776993 | 2.825170688 | 3.984049227 |
| 8.10705349  | 5.694767715 | 5.563068436 | 0.785274169 | 5.329422155 |
| 8.353070914 | 4.337933946 | 2.757031778 | 0.966292448 | 6.211083168 |
| 4.239498587 | 3.646495946 | 2.622460948 | 1.849946996 | 1.220781332 |
| 6.201658562 | 4.50574075  | 2.753766647 | 0.385621618 | 4.811435039 |
| 10.08061578 | 5.540810335 | 5.489684614 | 4.969393495 | 6.664471843 |
| 7.415741243 | 2.683414876 | 5.150433412 | 13.66918226 | 4.38885463  |
| 7.116063954 | 4.298194842 | 3.779030588 | 0           | 5.724094364 |
| 6.664120222 | 5.192456651 | 3.014825326 | 0.840730119 | 5.982518369 |
| 7.223821062 | 3.937414371 | 3.295754394 | 0.026391679 | 4.131024148 |
| 7.320252183 | 4.668793854 | 5.024849293 | 2.020794228 | 4.779916157 |
| 6.622495733 | 4.311781896 | 3.458762598 | 3.724206726 | 5.39268731  |
| 8.225552473 | 3.573599198 | 5.656560641 | 2.684566289 | 5.04693999  |
| 7.224405303 | 4.123180668 | 5.118145231 | 0.644151704 | 3.766265252 |
| 6.047771336 | 5.517435591 | 5.797566848 | 1.34337384  | 4.205765174 |
| 5.70572382  | 5.810199838 | 5.430707501 | 2.428261889 | 6.469922852 |
| 7.743756701 | 3.971444848 | 3.245340635 | 1.713221761 | 4.643815344 |
| 7.209105379 | 4.23299951  | 4.016405444 | 0.673814881 | 4.741672578 |
| 3.945395179 | 4.379968521 | 4.664074939 | 5.063658754 | 4.499704429 |



|             |             |             |             |             |
|-------------|-------------|-------------|-------------|-------------|
| 5.515487464 | 3.285146201 | 3.993468674 | 0.062904475 | 4.204284918 |
| 7.921688889 | 3.635543831 | 2.921904346 | 0.612594546 | 5.698644795 |
| 6.480238813 | 5.294125621 | 2.805509333 | 8.82713383  | 2.465031013 |
| 5.095132556 | 6.222296681 | 3.919291082 | 4.355144495 | 6.624656039 |
| 5.46882614  | 5.284937887 | 2.929730033 | 3.356343204 | 3.530133395 |
| 6.831795672 | 3.172696984 | 3.985861146 | 0.036959052 | 4.504452498 |
| 8.476099588 | 3.440626793 | 3.287195502 | 2.430838259 | 9.36238417  |
| 6.805161298 | 6.119870441 | 4.628293371 | 0.54964009  | 5.597555951 |
| 6.760183009 | 2.967318388 | 2.961437297 | 9.5290025   | 6.252033338 |
| 6.857847558 | 2.761040191 | 3.790846994 | 3.034651016 | 1.975774501 |
| 8.508024557 | 5.343966609 | 1.689080962 | 5.041496889 | 5.779210606 |
| 7.835250553 | 5.708063816 | 3.899848527 | 0.09948315  | 5.414242212 |
| 5.763474916 | 4.817996679 | 4.816961678 | 0.023236656 | 3.699044738 |
| 6.880885605 | 3.735070359 | 3.493762063 | 0.246143167 | 5.79033453  |
| 5.735660852 | 3.7883144   | 3.994867657 | 6.987125869 | 3.788382825 |
| 7.061078573 | 6.492203906 | 5.654150833 | 6.102582295 | 5.975393064 |
| 6.185415662 | 4.562762771 | 5.147612708 | 2.675265375 | 4.855378259 |
| 6.848786399 | 5.991124956 | 2.853497018 | 3.461282208 | 5.838271701 |
| 7.004985846 | 4.557314108 | 3.432881109 | 0           | 3.972731747 |
| 7.363563189 | 6.344868971 | 0.095828963 | 4.14914531  | 7.019400271 |
| 7.171729958 | 4.352100154 | 2.921348168 | 2.121172228 | 5.123816188 |
| 6.824618289 | 4.691833859 | 2.914369765 | 1.87632338  | 4.690806917 |
| 5.882977334 | 4.224992366 | 4.378554452 | 0.69662305  | 3.996151956 |
| 8.215361318 | 3.506740643 | 2.747429345 | 0           | 5.552168057 |
| 6.150966405 | 2.194271208 | 1.519358668 | 6.592229473 | 5.270602108 |
| 7.530055581 | 3.412138349 | 3.633610754 | 0.891749671 | 4.907039023 |
| 8.132638958 | 6.346357839 | 4.985974143 | 3.307787366 | 6.094618805 |
| 5.181137164 | 5.46028656  | 4.268978101 | 2.652077065 | 5.179840022 |
| 7.965481709 | 4.009568907 | 3.685892641 | 1.065924882 | 5.39106374  |
| 7.271845416 | 4.452743802 | 4.51947288  | 0.011825423 | 5.646530477 |
| 4.709671875 | 6.125250345 | 4.095206736 | 1.902842116 | 3.602181598 |
| 5.954800596 | 3.459517037 | 3.574886124 | 4.263067228 | 5.22625675  |
| 6.227809456 | 3.752386386 | 4.801998266 | 2.947455786 | 4.943331309 |
| 8.112787655 | 3.316643674 | 1.705473203 | 5.616045576 | 5.062057806 |
| 7.063519507 | 1.559272364 | 5.358713582 | 2.968600887 | 5.580636835 |
| 6.785562933 | 4.788991809 | 3.085837055 | 0.121499127 | 4.539086132 |
| 6.383257691 | 2.401978496 | 3.909318654 | 6.429759858 | 5.756876058 |
| 7.554624715 | 4.308476485 | 2.863741583 | 1.038273613 | 6.601380171 |
| 7.071982255 | 4.771278609 | 3.413802403 | 0           | 5.922285058 |
| 6.564440406 | 3.88258235  | 5.050764357 | 3.455662892 | 4.773026971 |
| 5.032402492 | 6.057809868 | 4.07578459  | 7.52598691  | 5.903402983 |
| 6.185498689 | 4.564857718 | 3.678802187 | 5.599463732 | 5.719836592 |
| 7.149143197 | 4.197948841 | 3.177925387 | 4.198890093 | 5.72396021  |
| 7.080462349 | 3.427070689 | 4.189182795 | 0.480432354 | 6.351322034 |
| 5.390920327 | 5.240434127 | 3.21009647  | 0.093397629 | 2.982009949 |
| 7.911040121 | 4.573494407 | 1.784363987 | 3.042530569 | 4.712154054 |
| 7.027453344 | 5.419316092 | 2.609149597 | 3.02503806  | 5.755057371 |
| 6.944833958 | 4.163931383 | 3.751672966 | 2.851773394 | 3.843389743 |
| 8.356997957 | 2.646863541 | 4.89576515  | 1.848169537 | 5.157607972 |
| 7.128616235 | 3.057641696 | 4.226124635 | 1.660666484 | 4.999939703 |
| 8.409120829 | 6.646145201 | 2.911706379 | 1.479767097 | 6.108151418 |
| 6.329471012 | 4.670149952 | 1.805322362 | 5.411621256 | 4.864325752 |
| 7.48987622  | 3.240692663 | 2.920604171 | 1.929598076 | 5.043407737 |
| 4.720539105 | 3.551874205 | 3.289385842 | 2.292124288 | 6.250601443 |
| 6.072803828 | 5.411794827 | 3.420294669 | 0.896368981 | 4.734851284 |
| 6.479314725 | 4.567033402 | 4.80337653  | 3.089472181 | 5.175072778 |
| 5.698626323 | 6.415580883 | 4.199011337 | 1.130006913 | 5.111447744 |
| 7.17279294  | 3.588947937 | 4.483540548 | 3.148425846 | 5.16208089  |

| hsa-miR-501-5p | hsa-miR-34c-5p | hsa-miR-6503-5p | hsa-miR-9-5p | hsa-let-7c-3p |
|----------------|----------------|-----------------|--------------|---------------|
| 5.593151184    | 3.280589089    | 1.924101488     | 9.771082548  | 4.901191963   |
| 3.917160214    | 1.857757624    | 0.042529834     | 9.75749553   | 5.252633916   |
| 3.333356906    | 3.624226559    | 1.100272723     | 10.69578622  | 4.757569896   |
| 5.48362268     | 2.077061312    | 0.01105324      | 13.5773278   | 5.61621974    |
| 3.087706468    | 3.085359583    | 1.321983728     | 11.7923755   | 5.874342403   |
| 3.823214603    | 1.161545098    | 0.030257887     | 9.33655808   | 4.947792378   |
| 2.961582448    | 3.23518766     | 1.41808229      | 9.678162687  | 6.20788994    |
| 4.277047408    | 2.091999208    | 2.077127937     | 11.53528936  | 6.665706368   |
| 4.206523596    | 3.886183392    | 0               | 8.533716893  | 3.792054421   |
| 5.5173905      | 0.045211919    | 0.028535551     | 9.425142319  | 3.219604934   |
| 4.262572288    | 1.057171395    | 2.020590265     | 15.24365491  | 7.279953928   |
| 4.226306617    | 3.452181839    | 0.121275075     | 14.29859459  | 5.186456175   |
| 1.992674202    | 0.105601052    | 0.063601127     | 9.550642552  | 4.673846649   |
| 5.39732457     | 4.293587547    | 0               | 11.78705346  | 2.558847336   |
| 5.981600649    | 2.716131042    | 2.124373434     | 9.316744448  | 3.961489256   |
| 4.293450177    | 2.507748278    | 1.122385379     | 8.732367403  | 3.523816108   |
| 4.388924502    | 7.168502783    | 2.962188507     | 12.81285225  | 4.216047677   |
| 2.04438639     | 1.726184938    | 2.17249614      | 8.530004232  | 5.495179778   |
| 2.934701349    | 0.077097215    | 0.047454491     | 9.348241169  | 6.496624484   |
| 4.290385462    | 0.237340739    | 0.130243224     | 10.48127548  | 4.144907498   |
| 4.199066063    | 4.320891588    | 2.090159917     | 9.079460923  | 5.412837637   |
| 2.552999435    | 0.281394475    | 0.150047644     | 8.90831353   | 4.949211325   |
| 3.945915377    | 2.713949498    | 0.017303687     | 8.464271622  | 6.051570454   |
| 3.19185076     | 1.454171996    | 0.083451103     | 10.38771316  | 5.468835309   |
| 2.567608954    | 2.565914548    | 0.082742877     | 9.476818944  | 4.735581218   |
| 2.829444969    | 1.57797486     | 1.625008106     | 9.218755854  | 6.020324227   |
| 5.490195187    | 3.668319191    | 0.980829729     | 10.61926435  | 4.426166951   |
| 2.588811652    | 1.19790769     | 1.785698566     | 8.314585192  | 6.059094366   |
| 4.39495651     | 1.269990359    | 1.85443927      | 7.790153489  | 4.570887578   |
| 2.990810276    | 3.891248239    | 0.024182748     | 12.18501761  | 5.844576044   |
| 3.34301552     | 5.114861678    | 0.514036738     | 9.584221202  | 4.866500964   |
| 4.08699845     | 3.458979422    | 2.321582789     | 13.24521133  | 4.321456958   |
| 2.551153993    | 6.111529335    | 1.705299281     | 8.434981645  | 4.862060453   |
| 3.994440306    | 4.126658578    | 1.314808892     | 10.17861038  | 4.594030384   |
| 5.147983579    | 2.725534718    | 2.314842372     | 17.4698317   | 6.629312932   |
| 3.616549477    | 4.764654305    | 0.143897402     | 15.50149397  | 5.101190177   |
| 3.875388074    | 2.051006907    | 1.340034827     | 6.983268287  | 5.752168637   |
| 5.575695252    | 4.092654381    | 1.380037149     | 10.37916995  | 3.509943431   |
| 3.373514493    | 0.080259909    | 1.232503284     | 10.21791701  | 6.284756109   |
| 4.195268199    | 0.02068437     | 2.077767616     | 11.22867434  | 2.909203786   |
| 3.90973947     | 1.31517792     | 1.896430254     | 7.325248016  | 5.681366012   |
| 3.765909303    | 0.063225214    | 0.039339096     | 9.625523029  | 5.60726634    |
| 4.367613823    | 0.121894485    | 0.072527564     | 7.913274722  | 5.790109767   |
| 4.677737109    | 2.578681931    | 1.169150586     | 12.10141365  | 5.719133071   |
| 5.388058113    | 2.712352754    | 0.940673003     | 10.46072757  | 4.849815288   |
| 3.689284825    | 0              | 1.503247955     | 8.916064875  | 3.967508256   |
| 4.275635995    | 2.166309015    | 0.090769531     | 11.36321257  | 2.622063531   |
| 3.577449187    | 3.06177571     | 0.105070328     | 9.629889756  | 4.389468137   |
| 3.296226874    | 2.006254774    | 1.308197467     | 9.759051796  | 5.433778188   |
| 3.37069863     | 2.12870116     | 0.873642939     | 8.732614371  | 4.301218038   |
| 4.261576676    | 1.595679189    | 1.00799743      | 10.67878515  | 4.920846461   |
| 4.760797862    | 1.817031833    | 1.573009846     | 9.428035509  | 4.608812683   |
| 2.225163986    | 1.173541572    | 1.154285496     | 11.62605799  | 3.958891846   |
| 4.566150797    | 3.562622257    | 0.01307941      | 13.42793102  | 4.013119763   |
| 3.978352358    | 0.01364806     | 1.634169038     | 9.530980749  | 7.35089623    |
| 3.712487926    | 2.45936934     | 0               | 9.002226798  | 3.532517522   |

|             |             |             |             |             |
|-------------|-------------|-------------|-------------|-------------|
| 2.344918335 | 2.651113658 | 2.754953537 | 8.486086635 | 6.276091986 |
| 3.486746618 | 1.41783892  | 0           | 9.797792231 | 5.729166993 |
| 4.084066643 | 1.591138002 | 1.247158375 | 11.69763276 | 2.844725469 |
| 5.305681894 | 0.668486309 | 0           | 7.452805632 | 4.706518646 |
| 2.970484802 | 0.033704576 | 1.102438526 | 10.6536019  | 6.011713569 |
| 3.198814483 | 0           | 0           | 9.144056429 | 4.853926813 |
| 4.500801973 | 2.105366708 | 1.609462537 | 9.69246458  | 4.806859314 |
| 3.504719062 | 2.363386685 | 1.027263138 | 7.919002116 | 5.85528717  |
| 3.866770423 | 2.547919155 | 0.9763576   | 9.989514545 | 3.767111009 |
| 3.62722431  | 1.211082972 | 1.186696607 | 15.02867345 | 6.894558507 |
| 3.989316649 | 0.05878361  | 0.036703549 | 7.445517034 | 6.624689113 |
| 2.978517729 | 0.985492753 | 2.567941043 | 8.161156793 | 5.953894187 |
| 4.879608529 | 5.399073758 | 0.984231927 | 9.029672993 | 5.61603527  |
| 4.37403977  | 1.402222277 | 0.594501732 | 8.503350504 | 4.960615788 |
| 3.064618445 | 1.907037329 | 0           | 9.675675624 | 3.352022049 |
| 3.259545477 | 0.054195964 | 1.161226135 | 7.693318851 | 5.365832767 |
| 2.744346253 | 2.28240351  | 0.108843681 | 9.885622462 | 5.942644488 |
| 3.179795881 | 2.594382554 | 0.00125192  | 12.49738372 | 2.816995646 |
| 3.198754438 | 1.994269517 | 0.175495231 | 7.350568059 | 7.02732509  |
| 5.692454647 | 2.364604654 | 1.028064604 | 9.501385248 | 5.334516734 |
| 3.092868461 | 2.615200532 | 0.160084393 | 8.754950205 | 3.979727729 |
| 4.322123333 | 2.063485243 | 0.009099597 | 7.785031334 | 6.947275635 |
| 4.040469349 | 0           | 0           | 7.213409077 | 2.075688452 |
| 4.000435665 | 1.288213461 | 1.252209933 | 9.3706362   | 6.912390898 |
| 5.37531377  | 2.220437931 | 0           | 11.72271375 | 2.700417462 |
| 3.576863388 | 2.59058507  | 2.146928792 | 9.140228785 | 4.462485579 |
| 1.152848617 | 0.045517259 | 1.741996059 | 13.58981722 | 4.935492638 |
| 4.671540626 | 0           | 1.565385506 | 8.903614317 | 4.292971405 |
| 4.54165002  | 2.968768586 | 0.878234333 | 12.02465069 | 4.245626281 |
| 3.116808239 | 1.22056395  | 1.194827589 | 8.461826066 | 6.065387041 |
| 3.184395941 | 1.675780132 | 0.122222754 | 9.410932084 | 3.909143869 |
| 3.803269819 | 2.918230277 | 1.391800167 | 9.23478652  | 6.286666975 |
| 4.307459726 | 1.554686303 | 0           | 7.803617648 | 4.993817805 |
| 3.662241307 | 2.599444649 | 2.474809894 | 12.14737169 | 5.28605505  |
| 5.407692303 | 10.51130396 | 0           | 10.3113191  | 3.745377893 |
| 2.133232857 | 0.029963495 | 0.019145496 | 10.43398557 | 6.730136476 |
| 3.948703442 | 2.759214704 | 2.546056407 | 8.78816966  | 7.674288077 |
| 4.095051816 | 4.095004709 | 1.590165787 | 11.51133325 | 4.708202127 |
| 4.573549911 | 0.065934381 | 0.040937725 | 8.817013943 | 3.486250618 |
| 3.624843765 | 1.844339109 | 1.458616828 | 9.335037282 | 6.393031684 |
| 4.679755183 | 2.97746172  | 0           | 9.355061198 | 4.632278635 |
| 2.535649662 | 0.965657384 | 0.968606702 | 7.443527239 | 7.25700739  |
| 3.490293256 | 1.852540153 | 0.041713869 | 10.21061458 | 4.728754683 |
| 3.586722158 | 2.022841163 | 0.180128856 | 9.388757606 | 4.668416029 |
| 2.779669416 | 0.855079134 | 0.865645188 | 9.770043969 | 5.845853568 |
| 2.874302219 | 3.455649204 | 0.922968674 | 15.04580074 | 4.619528341 |
| 4.09909299  | 5.097300908 | 0.871798391 | 8.544424063 | 3.777796006 |
| 4.410175573 | 5.801108795 | 0.433575963 | 8.642895173 | 3.84646104  |
| 4.7754298   | 5.989612474 | 0.016120667 | 15.2402584  | 4.717884132 |
| 3.609016242 | 2.020934359 | 1.60172229  | 12.8903595  | 5.484692967 |
| 4.046693034 | 1.092552639 | 1.681123713 | 12.06131083 | 4.666789107 |
| 3.667079459 | 2.497160358 | 0.808486378 | 10.48210376 | 4.358930864 |
| 5.293538861 | 2.72939564  | 0.655532708 | 10.2614956  | 4.01329322  |
| 3.815752404 | 1.349405922 | 0.064658555 | 11.16633206 | 6.476725983 |
| 5.499291141 | 3.428049435 | 0.380155693 | 7.423824146 | 3.36417163  |
| 3.12204416  | 1.710534564 | 0           | 9.766958493 | 5.617035812 |
| 3.826654243 | 3.150595675 | 1.202442983 | 10.89964269 | 4.550737422 |
| 3.766550723 | 0.910745949 | 0           | 9.918499875 | 3.765694594 |

|             |             |             |             |             |
|-------------|-------------|-------------|-------------|-------------|
| 3.993316767 | 1.199209251 | 1.17648268  | 16.08460833 | 1.822404946 |
| 4.392252463 | 4.013429286 | 1.501073044 | 12.3968438  | 4.993841853 |
| 0.115065805 | 0.113017007 | 0.067690505 | 11.06123876 | 7.022693692 |
| 2.401311809 | 3.20673963  | 0.483986668 | 11.71438002 | 2.402302006 |
| 5.583985281 | 7.561815634 | 0.046753611 | 10.63664773 | 4.177592919 |
| 3.985772755 | 1.119101745 | 0.022366432 | 15.25322992 | 5.042351414 |
| 3.116049514 | 3.439502311 | 0.015013011 | 7.928430267 | 7.393098695 |
| 3.933699308 | 1.631384066 | 0.559979426 | 8.449463187 | 2.072396187 |
| 2.217893521 | 0.432508475 | 0.210596067 | 10.61647733 | 3.819824163 |
| 3.033927072 | 1.330617521 | 0.061258038 | 7.432803038 | 7.317515997 |
| 2.706170309 | 1.689166142 | 0.016203828 | 8.584761767 | 6.265050994 |
| 4.144114398 | 3.231311398 | 2.646200027 | 7.223714459 | 5.102032145 |
| 3.698326587 | 0.022133713 | 1.068104332 | 17.88792365 | 3.699047614 |
| 2.397245962 | 0.228854505 | 2.223223912 | 8.81388284  | 5.984938175 |
| 4.088163682 | 1.655064404 | 0.01089356  | 12.60516299 | 4.790828979 |
| 3.277967949 | 2.281533576 | 0           | 13.29681333 | 3.41497275  |
| 3.546726703 | 1.264768028 | 0.049268798 | 8.115190458 | 7.36911716  |
| 4.849593756 | 2.024312634 | 1.159806159 | 9.383353052 | 4.936231047 |
| 5.142301005 | 2.781935782 | 1.980322778 | 13.53384903 | 5.926043003 |
| 5.095962981 | 0.094046784 | 0.057139339 | 11.10760987 | 6.508540991 |
| 3.628687312 | 4.815521741 | 1.392033693 | 9.097957939 | 5.993000537 |
| 5.611232284 | 1.00375979  | 0           | 7.379149921 | 4.919644716 |
| 3.869858699 | 2.117700748 | 0           | 7.899341103 | 4.889612133 |
| 4.968892328 | 0           | 0           | 9.363569504 | 4.907128075 |
| 3.506901727 | 3.270537559 | 0.095144451 | 11.37129427 | 8.380055228 |
| 1.851808764 | 3.152651131 | 1.464732833 | 10.34045357 | 5.373142536 |
| 2.801094359 | 4.322917958 | 0.067076845 | 10.87361425 | 4.224080514 |
| 4.060244062 | 2.922832232 | 1.217279107 | 11.78624398 | 4.454826143 |
| 2.903978029 | 1.067160216 | 1.655153681 | 9.157750518 | 6.106260556 |
| 3.643555613 | 1.632076612 | 1.035110367 | 17.03126041 | 3.966581813 |
| 4.263669058 | 3.520427765 | 0.72663151  | 8.852692333 | 3.516358476 |
| 2.87911926  | 0.919424129 | 0           | 7.28424452  | 5.726077138 |
| 4.192573811 | 1.541774318 | 1.547145606 | 6.861058415 | 6.051258894 |
| 2.950107915 | 1.705563928 | 0.018759478 | 10.96989608 | 4.240044573 |
| 2.968624461 | 0.978838867 | 0           | 7.866235784 | 5.425402525 |
| 4.438507175 | 3.313279949 | 1.320684526 | 9.953863016 | 6.702466508 |
| 3.61418062  | 2.401270477 | 1.274366465 | 8.003691913 | 6.145296583 |
| 2.37569316  | 1.038992552 | 0.007357767 | 9.396214206 | 5.27113592  |
| 4.472865853 | 2.850759133 | 0           | 8.603804717 | 4.083235826 |
| 4.113719826 | 3.690215645 | 1.156044648 | 9.780560424 | 4.161266833 |
| 3.868180304 | 0.033074471 | 1.701013987 | 12.0983343  | 4.632154681 |
| 4.040546851 | 6.67560873  | 1.636949396 | 13.49441369 | 3.110493733 |
| 3.177800436 | 1.265874815 | 1.850573385 | 8.690668738 | 6.158224213 |
| 3.430021765 | 3.138685168 | 2.67145131  | 9.055284255 | 5.338583137 |
| 4.950138584 | 1.930281472 | 0.053875475 | 10.83061972 | 3.211620838 |
| 4.053648738 | 3.701358946 | 0.031070656 | 8.933393129 | 5.208987919 |
| 3.726339015 | 7.418897217 | 2.018966837 | 9.947977716 | 6.197137844 |
| 4.23513093  | 2.44222122  | 2.466164796 | 8.49016135  | 5.967084105 |
| 3.362374472 | 0           | 1.59727593  | 14.41909159 | 6.584807969 |
| 4.043522468 | 2.61206735  | 1.303112621 | 7.307226827 | 5.353395595 |
| 3.675961145 | 2.609616139 | 1.262648064 | 14.5161904  | 4.650424768 |
| 4.522403097 | 0.0548325   | 0.034343607 | 10.57232889 | 6.743359339 |
| 3.37791422  | 2.247623353 | 0           | 8.999550095 | 5.468297816 |
| 5.287791304 | 0           | 1.561996338 | 9.638886082 | 3.966349544 |
| 2.431431441 | 1.455041452 | 0.902600244 | 8.727133483 | 8.660943309 |
| 4.240854777 | 6.492572015 | 0           | 14.56457888 | 5.380463226 |
| 1.132057909 | 1.132422722 | 0.024847768 | 12.93690223 | 0.040896731 |
| 4.071264107 | 3.493353346 | 1.767041549 | 9.439812032 | 5.424228238 |

| hsa-miR-130a-3p | hsa-miR-589-3p | hsa-miR-30c-1-3p | hsa-miR-190b-5p | hsa-miR-3200-3p |
|-----------------|----------------|------------------|-----------------|-----------------|
| 8.74825634      | 1.992815388    | 2.769021128      | 3.265073573     | 1.994790606     |
| 9.313811299     | 1.228271533    | 2.892073876      | 3.311752309     | 4.508077641     |
| 7.61199173      | 2.740018122    | 2.472122835      | 1.718696385     | 2.741851307     |
| 6.536672536     | 4.175303848    | 2.076338357      | 0.015995572     | 5.735535472     |
| 9.105521545     | 3.680167225    | 3.303290596      | 0.105897386     | 0.117759491     |
| 6.481187504     | 1.778754548    | 3.550936348      | 0.044688087     | 1.160924936     |
| 6.53020763      | 2.158441131    | 2.604074348      | 1.487389797     | 2.162774039     |
| 8.538637017     | 2.682881715    | 1.07023995       | 0.019154188     | 1.06982517      |
| 8.971912535     | 2.480465692    | 2.220864504      | 2.221398486     | 3.693463943     |
| 6.144671143     | 3.921838075    | 2.525037066      | 0.042067098     | 1.768064107     |
| 8.586326723     | 4.031681281    | 1.944327527      | 0.581649679     | 6.429597555     |
| 7.719693208     | 2.356195771    | 1.665039541      | 2.342993527     | 2.364811058     |
| 7.749578747     | 2.433514974    | 3.267275547      | 1.341832061     | 2.437893943     |
| 8.677509003     | 3.432104464    | 1.975977804      | 2.297012437     | 1.975782902     |
| 6.695900322     | 4.778485521    | 0.172605519      | 0.168346449     | 2.719459131     |
| 6.887971268     | 4.007720846    | 0.03850238       | 1.748307118     | 5.495343385     |
| 6.471805229     | 3.881377023    | 1.028969064      | 0.561249831     | 3.751828609     |
| 8.220340202     | 1.318023975    | 2.538148211      | 0.749720772     | 1.894376142     |
| 8.364652136     | 2.325077189    | 3.350006866      | 1.885157939     | 3.827948663     |
| 7.964148812     | 2.874515607    | 3.486770277      | 1.712121647     | 1.721901161     |
| 7.088545561     | 4.040048064    | 2.203086547      | 4.404252933     | 2.670586438     |
| 4.842740275     | 3.004614333    | 1.830441781      | 0.252788056     | 1.839777282     |
| 7.336231384     | 1.696017123    | 2.936347177      | 2.935321012     | 2.120480026     |
| 7.923723395     | 3.411589743    | 2.112815791      | 2.109335361     | 0.145943917     |
| 7.768108687     | 2.561056094    | 3.770700254      | 3.392972308     | 3.419304998     |
| 6.810145326     | 3.583713116    | 4.019590629      | 0               | 2.518909268     |
| 9.026294846     | 3.553330031    | 1.972328857      | 1.972456615     | 6.566326981     |
| 7.374162343     | 2.254254936    | 2.583981778      | 1.197518739     | 3.609265456     |
| 6.873037709     | 3.546734538    | 1.904148381      | 2.338947016     | 1.906907383     |
| 8.758520635     | 2.76306949     | 3.352734725      | 1.128767446     | 4.194046706     |
| 8.363727416     | 1.788094295    | 2.469961651      | 2.330812331     | 0.941190001     |
| 8.780871139     | 2.80692305     | 3.169487469      | 0.999699635     | 3.999535941     |
| 9.163411961     | 3.656109713    | 3.122768137      | 1.000273633     | 4.999145451     |
| 8.269897745     | 2.443358298    | 0                | 1.67357143      | 4.50431971      |
| 8.094401224     | 2.993813731    | 2.383052993      | 1.303156675     | 4.140529446     |
| 6.296560548     | 5.133642163    | 2.952188891      | 0.240750042     | 0.275728041     |
| 7.614664519     | 2.04869709     | 3.528093664      | 2.486713644     | 3.54627012      |
| 5.149229097     | 2.886352085    | 3.173901199      | 1.751367935     | 5.901346528     |
| 7.092988034     | 1.899786295    | 3.689566916      | 1.263951763     | 2.948216316     |
| 7.854668424     | 2.683699503    | 2.091878492      | 1.070735388     | 2.419000927     |
| 7.03369408      | 3.00754543     | 3.894444478      | 1.313791121     | 8.242586765     |
| 4.314864362     | 1.210940007    | 2.268430403      | 1.834257374     | 4.010090915     |
| 7.80993155      | 2.832100688    | 3.100102653      | 0.11211019      | 2.049854502     |
| 8.703136731     | 3.859181625    | 2.574743151      | 0.052964364     | 5.646692135     |
| 7.853127078     | 4.221682455    | 1.5059269        | 1.506150846     | 6.52483398      |
| 7.28423849      | 3.344689765    | 4.690477505      | 3.209793206     | 3.342919943     |
| 7.033944956     | 5.437613074    | 2.608528355      | 4.112347564     | 5.349817526     |
| 6.670587576     | 3.329347915    | 4.078424594      | 1.570650551     | 3.345514205     |
| 7.468072878     | 1.355559751    | 3.806913481      | 3.277558676     | 2.452594452     |
| 8.646480625     | 1.416566239    | 0                | 1.417260669     | 4.777369922     |
| 7.440539627     | 3.334951316    | 2.597297992      | 4.01302805      | 4.714229854     |
| 7.860801559     | 2.767114182    | 2.460351183      | 5.653053954     | 4.612767949     |
| 4.585451963     | 2.823029136    | 2.552621718      | 5.336455405     | 3.840762652     |
| 8.012100951     | 2.906009351    | 3.098931016      | 2.680508647     | 3.101326802     |
| 7.075273884     | 3.528599401    | 2.873657153      | 1.641387317     | 1.046663244     |
| 5.982120437     | 2.246083729    | 2.247786308      | 1.996142554     | 4.825308242     |

|             |             |             |             |             |
|-------------|-------------|-------------|-------------|-------------|
| 8.363804035 | 1.719046872 | 3.63198928  | 0.592366375 | 1.958702279 |
| 6.18267155  | 3.250814035 | 3.491821364 | 0.864079359 | 4.733394748 |
| 5.821607023 | 1.891450622 | 1.892946081 | 1.89450677  | 3.673851626 |
| 7.698313995 | 3.35803417  | 1.540519319 | 0.666578726 | 6.579115274 |
| 8.305499368 | 1.722664312 | 3.485590134 | 1.114255082 | 1.113842023 |
| 6.447598025 | 0           | 3.827215251 | 0.833538651 | 2.558040838 |
| 8.779236295 | 3.070007196 | 1.186977005 | 1.563572842 | 2.315617624 |
| 7.548416385 | 2.627272908 | 3.365804579 | 1.030110863 | 2.039684956 |
| 6.384082398 | 2.286108746 | 3.661665374 | 2.548648225 | 3.660546601 |
| 7.754302675 | 2.603106621 | 3.883505903 | 1.210612873 | 3.300670936 |
| 7.236400824 | 2.853341406 | 3.44473823  | 2.249144615 | 2.254185874 |
| 7.828060827 | 1.567272115 | 2.786566915 | 0           | 2.301760263 |
| 6.41483304  | 3.558953871 | 3.781445824 | 2.29832389  | 4.365204255 |
| 7.88080347  | 3.906136254 | 1.930716139 | 2.482531506 | 2.61493897  |
| 7.161159345 | 2.485251853 | 2.897841235 | 0           | 2.224392716 |
| 5.602206864 | 2.233725996 | 4.260689399 | 1.181248863 | 3.725350466 |
| 8.784820803 | 3.355006361 | 1.594583492 | 1.59172778  | 3.806412062 |
| 5.436879367 | 2.594317877 | 2.008686285 | 2.33092958  | 2.594409282 |
| 7.126066771 | 2.702714639 | 0.313853744 | 0.304328191 | 1.995306798 |
| 6.199451904 | 5.601939133 | 2.040472266 | 2.363833693 | 9.109579519 |
| 7.426786348 | 3.699849035 | 2.592225676 | 3.043574957 | 0.314641479 |
| 7.692324794 | 2.063227735 | 4.159040551 | 0.013141291 | 1.643450488 |
| 8.673644081 | 3.428410581 | 3.728086099 | 0.826071586 | 3.424293615 |
| 7.631002121 | 1.926893302 | 3.720195455 | 0.081089245 | 2.979010933 |
| 8.241884083 | 4.346623821 | 1.496327391 | 0.927366061 | 6.204650333 |
| 8.230560714 | 3.099276747 | 3.582478895 | 1.40639502  | 3.85449019  |
| 7.724797034 | 0.044218582 | 3.920556396 | 1.153093687 | 1.152669868 |
| 7.592061147 | 5.256998782 | 1.975827956 | 0           | 4.058869525 |
| 7.69163544  | 3.381462539 | 2.613966203 | 1.423346651 | 5.369334103 |
| 7.397100304 | 1.848172769 | 2.612929542 | 1.845688855 | 2.889394141 |
| 6.749211272 | 2.362215684 | 4.038568049 | 0.199575256 | 3.185652659 |
| 7.670061298 | 4.211895968 | 2.117667103 | 0.131868446 | 2.577994918 |
| 6.600579023 | 4.045981445 | 2.809441213 | 3.794919127 | 0.680456455 |
| 6.518479311 | 2.415301637 | 4.165727414 | 1.648770841 | 4.153516683 |
| 9.353004043 | 4.690747283 | 0.503293721 | 2.35027473  | 5.769107337 |
| 7.371207323 | 2.726399628 | 3.468149009 | 4.733327505 | 3.472376245 |
| 9.318727579 | 2.759576799 | 2.759941137 | 0           | 2.537628227 |
| 8.187888007 | 3.17714133  | 2.591846648 | 0.001328255 | 4.531236764 |
| 6.268909078 | 4.640104026 | 1.21932464  | 0.061155404 | 4.412734145 |
| 6.421712182 | 3.521375501 | 3.629434995 | 1.845900896 | 2.992857478 |
| 6.679439703 | 2.83106624  | 2.009910182 | 0           | 4.161547814 |
| 7.644112406 | 2.757558284 | 3.64890229  | 2.27488796  | 1.954323453 |
| 7.444361802 | 3.484648487 | 1.223529414 | 1.223023293 | 2.622576618 |
| 7.638236567 | 2.01568382  | 2.007099544 | 2.705422648 | 3.232958693 |
| 6.295761096 | 2.374105254 | 3.943405248 | 4.297894702 | 0           |
| 7.336783937 | 2.684697714 | 2.876637326 | 0.916027069 | 3.042689813 |
| 7.515098316 | 3.109961239 | 2.603603145 | 2.962804933 | 5.058726037 |
| 9.74162089  | 3.818975818 | 2.307476639 | 2.31150587  | 6.298215678 |
| 7.683549197 | 2.438280789 | 2.927632622 | 6.335223079 | 3.713371907 |
| 8.05360149  | 4.547706723 | 3.192958419 | 1.015865529 | 2.830372586 |
| 7.754763695 | 2.447491385 | 1.092693649 | 1.69585827  | 3.134500164 |
| 8.971711762 | 2.853311269 | 2.284432725 | 0           | 2.496504838 |
| 7.764569628 | 3.478283615 | 2.24390581  | 0.635598999 | 3.093020056 |
| 8.223040023 | 3.805370293 | 2.43709175  | 3.269987687 | 3.28888695  |
| 7.884248992 | 2.538407599 | 1.904126047 | 4.491553584 | 4.656764301 |
| 8.875228463 | 2.018256707 | 3.128652664 | 2.491246773 | 2.269986434 |
| 7.602021241 | 3.25944908  | 2.0837372   | 2.481994092 | 3.25253259  |
| 7.20046256  | 3.563273076 | 3.950306824 | 3.189061712 | 4.94345604  |

|             |             |             |             |             |
|-------------|-------------|-------------|-------------|-------------|
| 7.275707311 | 3.083732818 | 1.199234497 | 3.078613771 | 5.727885832 |
| 8.184459463 | 3.716532335 | 1.447278355 | 1.085047513 | 5.274348534 |
| 5.86895087  | 4.318910655 | 3.295686274 | 2.790325948 | 2.018819226 |
| 6.717287594 | 3.13382473  | 3.624379648 | 0.896258643 | 4.215298605 |
| 5.510914439 | 2.654347126 | 3.517442132 | 2.648983138 | 3.683093053 |
| 8.183129244 | 2.482832529 | 3.630612076 | 0.032757055 | 3.762327145 |
| 6.960003347 | 2.430350382 | 5.16292684  | 0.02181693  | 2.697399149 |
| 6.019819164 | 2.251744348 | 3.211838474 | 0.538820954 | 6.516927475 |
| 7.965371915 | 2.930472116 | 5.156516309 | 0.380211162 | 3.446322905 |
| 6.822598469 | 3.027187332 | 3.914386011 | 2.411574897 | 1.3295644   |
| 5.943565009 | 3.934733951 | 4.374825526 | 1.688214586 | 2.112859831 |
| 8.635020986 | 1.307867635 | 2.387017818 | 1.945461101 | 2.393620807 |
| 7.368685685 | 2.42476235  | 1.07572439  | 4.19769297  | 5.326822977 |
| 8.261518933 | 3.195065317 | 0.212769405 | 1.689819825 | 0.235520546 |
| 7.221937891 | 3.083302814 | 3.082541466 | 1.654472459 | 1.654967979 |
| 6.061286288 | 1.961536657 | 4.203887619 | 2.765914525 | 3.277921035 |
| 8.516228134 | 3.170546067 | 3.16674836  | 1.896516758 | 2.948130968 |
| 8.24567206  | 4.459186086 | 2.729936644 | 2.988615461 | 3.189881401 |
| 8.629660646 | 2.974449022 | 2.297958324 | 1.97712757  | 2.974117183 |
| 6.299638612 | 4.831164818 | 2.722722036 | 1.306621306 | 5.665132169 |
| 8.648745591 | 2.571243498 | 3.409808105 | 1.455289648 | 2.921771729 |
| 7.355113796 | 2.921425526 | 1.875265575 | 1.002594249 | 5.415449293 |
| 6.71151298  | 3.0835342   | 2.964574637 | 3.585042855 | 3.799803856 |
| 8.901124836 | 1.929796665 | 2.990138649 | 0.574350702 | 2.616302634 |
| 7.349637878 | 3.261614443 | 2.97845442  | 4.594189824 | 4.039979722 |
| 8.08224211  | 0.889369733 | 1.449469359 | 1.44981295  | 1.851855898 |
| 5.827429859 | 2.456747752 | 2.790263884 | 5.405026986 | 2.461535866 |
| 6.949871065 | 1.247120084 | 3.93153989  | 3.336286003 | 4.534754158 |
| 7.736940441 | 1.666227292 | 2.901994181 | 2.412224062 | 2.414178329 |
| 7.170956252 | 1.038871797 | 2.374657451 | 0.010548252 | 3.517795317 |
| 6.107250528 | 4.161779909 | 1.902422524 | 4.569348029 | 6.476724114 |
| 7.006083817 | 2.689400938 | 3.463076227 | 1.486554222 | 0.91978378  |
| 5.825201416 | 3.531599547 | 3.269618133 | 0           | 5.153161645 |
| 4.855443927 | 2.948302535 | 1.70489668  | 1.099766178 | 4.151150015 |
| 7.400051751 | 2.292677092 | 3.428026369 | 2.555312295 | 0.978930817 |
| 8.210775292 | 4.768867635 | 2.01910021  | 0.105425175 | 3.316718038 |
| 7.587827755 | 3.006923788 | 4.345435864 | 0.088846652 | 1.313666304 |
| 8.301323175 | 2.051162062 | 3.37869436  | 3.055460318 | 3.966554167 |
| 7.821966608 | 2.458959181 | 2.121287896 | 1.033740516 | 3.630120203 |
| 7.498371422 | 3.894973553 | 2.979437499 | 2.418469962 | 1.776649048 |
| 4.494288594 | 4.253478051 | 3.32967267  | 1.112166336 | 1.720300522 |
| 10.34260596 | 3.908706162 | 2.335007208 | 1.286099552 | 5.850196444 |
| 8.584277885 | 2.944221449 | 2.670228537 | 2.667485294 | 5.149922491 |
| 8.806616389 | 2.416803947 | 3.066811633 | 0.468105959 | 3.135371241 |
| 7.143526991 | 0.085538584 | 2.971465013 | 3.195512376 | 2.371640167 |
| 8.282831759 | 3.559590455 | 2.542775626 | 1.782230517 | 3.042404916 |
| 9.04993925  | 3.484675696 | 3.346785417 | 2.022142123 | 4.933542838 |
| 7.543264005 | 3.43391812  | 3.550248494 | 0.901236267 | 1.46414237  |
| 9.452828009 | 2.651298737 | 3.170868577 | 0           | 3.048066919 |
| 8.404290758 | 2.213345187 | 3.189422474 | 1.273794824 | 3.589029857 |
| 7.120161275 | 4.149431557 | 3.582920244 | 5.118877061 | 4.656526991 |
| 7.515577789 | 3.849355624 | 3.8461673   | 3.717050127 | 3.26271724  |
| 7.23434891  | 2.729914269 | 2.248395991 | 0           | 3.240886975 |
| 9.547829488 | 3.667906846 | 2.55461014  | 0           | 6.666023862 |
| 7.323652109 | 4.226615863 | 2.433494391 | 0           | 1.455326515 |
| 7.166948933 | 3.956537528 | 2.842316409 | 4.311096135 | 4.292036707 |
| 6.014813717 | 2.171575919 | 3.649206419 | 2.169580913 | 3.191113139 |
| 8.53741286  | 0.803262456 | 3.019654441 | 0           | 1.733503049 |

| hsa-miR-3144-3p | hsa-miR-196b-5p | hsa-miR-30d-5p | hsa-miR-500b-5p | hsa-miR-500a-5p |
|-----------------|-----------------|----------------|-----------------|-----------------|
| 2.411656318     | 4.830962831     | 17.02863687    | 5.938395435     | 5.938392897     |
| 0.057745738     | 7.12084587      | 16.47931279    | 3.919064654     | 3.919063897     |
| 0.028062269     | 9.74967128      | 14.52664781    | 4.340408318     | 4.340407853     |
| 2.398096495     | 11.189147       | 15.54651223    | 5.677191108     | 5.677190733     |
| 0.095310056     | 7.145611106     | 14.8470213     | 4.235200373     | 4.235198785     |
| 0.040696983     | 5.805578677     | 16.47524255    | 3.697697194     | 3.697696757     |
| 0.126895323     | 4.277992825     | 18.09878361    | 4.0064404       | 4.006438507     |
| 1.069081547     | 8.388558388     | 16.40734896    | 4.967177099     | 4.967176726     |
| 0.927767946     | 4.406655736     | 16.09938944    | 4.583467052     | 4.583467373     |
| 1.761178185     | 3.390904448     | 17.75123163    | 4.933003249     | 4.933002428     |
| 2.662844291     | 8.974525419     | 13.99080923    | 4.924418009     | 4.924419894     |
| 1.638998805     | 5.99884292      | 16.07469745    | 4.375615392     | 4.375611998     |
| 2.743109663     | 3.654414947     | 15.94453876    | 3.951020438     | 3.951019226     |
| 0               | 8.332083876     | 15.4691933     | 5.525382281     | 5.525382391     |
| 0.149745558     | 9.395280094     | 14.79714239    | 6.438130499     | 6.438125573     |
| 0.034438556     | 7.365759696     | 16.16552232    | 5.210685634     | 5.210684834     |
| 0.562709033     | 7.348076561     | 12.7653895     | 4.424208207     | 4.42420981      |
| 1.069476637     | 4.734518703     | 14.82306432    | 3.300141296     | 3.300142123     |
| 2.639818        | 3.689106732     | 15.37648685    | 2.935536024     | 2.935535844     |
| 3.149343975     | 4.575569136     | 16.46278364    | 3.964120379     | 3.96411746      |
| 1.51493523      | 3.729852508     | 16.48371701    | 4.928913694     | 4.928910435     |
| 3.265032912     | 3.019429561     | 15.52033407    | 4.284244739     | 4.284240443     |
| 0.023043058     | 8.02936526      | 16.01881151    | 4.726965544     | 4.785998581     |
| 1.438632412     | 4.904995665     | 15.86753419    | 4.098584756     | 4.098582922     |
| 2.86286393      | 8.028518678     | 15.06038271    | 4.093351882     | 4.093350072     |
| 0               | 3.656647788     | 14.5757063     | 4.064906542     | 4.064907494     |
| 2.778572334     | 9.522067647     | 16.74391858    | 4.824583125     | 4.824583228     |
| 2.242023163     | 5.920227971     | 16.9287694     | 3.283174483     | 3.283174157     |
| 0.068597784     | 5.902611646     | 16.04212039    | 4.203058507     | 4.203057413     |
| 3.495360691     | 9.723866044     | 15.92635099    | 4.58901299      | 4.589012385     |
| 2.496401085     | 5.099634188     | 16.24103538    | 3.48046843      | 3.480469309     |
| 2.584559413     | 7.706870981     | 17.73799158    | 5.169448666     | 5.169448668     |
| 0               | 1.877173349     | 16.85549878    | 4.340043343     | 4.340044945     |
| 0.760557062     | 4.948768024     | 17.08017445    | 4.183373494     | 4.183374316     |
| 0.077548369     | 5.984046899     | 16.33744018    | 6.040109373     | 6.040107125     |
| 5.107570509     | 3.859352096     | 14.93459011    | 5.859548257     | 5.859541509     |
| 0.101125197     | 10.13563085     | 14.27698049    | 4.264970498     | 4.264968776     |
| 2.900530758     | 10.04173298     | 17.48511433    | 5.756445972     | 5.756447087     |
| 1.258445012     | 11.28595194     | 17.94310784    | 5.203667962     | 5.203666354     |
| 0.017680022     | 7.764296224     | 17.18269721    | 4.810291367     | 4.810291011     |
| 1.941612591     | 7.931920614     | 17.15006096    | 4.040100407     | 4.040099235     |
| 0.053282332     | 3.894595354     | 16.78656039    | 4.011358417     | 4.011357674     |
| 0.100782612     | 4.37383713      | 17.23043537    | 3.877048225     | 3.877046891     |
| 2.562890303     | 8.945771762     | 15.35584528    | 5.096840711     | 5.096839615     |
| 0               | 4.802458753     | 15.66786567    | 5.895026537     | 5.895026952     |
| 0               | 9.947190178     | 14.45194328    | 3.342670808     | 3.20602936      |
| 4.199606145     | 5.175260462     | 14.26912926    | 4.955071062     | 4.955068062     |
| 4.022727505     | 1.561832072     | 16.887461      | 4.115977561     | 4.11597511      |
| 3.621539909     | 7.571231143     | 14.50323553    | 2.792795531     | 2.792795418     |
| 0               | 4.362361321     | 16.62777901    | 5.023560055     | 5.023560749     |
| 0.00218841      | 10.05461399     | 15.97692399    | 5.101395479     | 5.101395431     |
| 1.157958437     | 6.536878979     | 16.86551779    | 5.48314788      | 5.483149743     |
| 2.541966681     | 7.471366796     | 15.24483719    | 4.584143618     | 4.584142794     |
| 2.086942689     | 5.318906039     | 16.25245063    | 5.318058282     | 5.318057872     |
| 1.046218141     | 12.78515257     | 16.92267921    | 4.773619789     | 4.773619558     |
| 0               | 7.784105496     | 16.44486722    | 4.261678592     | 4.261679414     |



|             |             |             |             |             |
|-------------|-------------|-------------|-------------|-------------|
| 2.188436525 | 5.222125749 | 14.9802001  | 4.324528121 | 4.32452955  |
| 0           | 2.795568384 | 16.98924875 | 4.82230422  | 4.822304864 |
| 0.704232573 | 8.881961854 | 16.09028328 | 4.948801836 | 4.948803237 |
| 2.498304813 | 2.917783872 | 15.5282561  | 5.120543244 | 5.120544884 |
| 4.800711373 | 4.422951054 | 16.69506372 | 4.261238263 | 4.261237807 |
| 2.095405509 | 10.53316429 | 16.05505499 | 4.534296289 | 4.534296984 |
| 0.683478548 | 4.312184675 | 16.05723158 | 4.540562549 | 4.540563821 |
| 0.007494994 | 8.934396401 | 16.47826868 | 3.746378176 | 3.746378094 |
| 1.554228078 | 8.034381718 | 15.68602348 | 3.660431212 | 3.660431276 |
| 0.053386801 | 4.77865797  | 17.86593269 | 5.17731474  | 5.177313489 |
| 1.810848395 | 2.855264874 | 15.78428143 | 4.755629858 | 4.755628851 |
| 0           | 6.515568856 | 14.01924591 | 4.147213926 | 4.147213978 |
| 2.976105432 | 3.295831505 | 16.58780178 | 5.398625735 | 5.398625836 |
| 1.412873636 | 3.507106123 | 16.13440627 | 5.341098246 | 5.341100415 |
| 2.228984648 | 5.768589348 | 14.45723298 | 4.64318518  | 4.643185494 |
| 0.045809436 | 3.969909936 | 16.05244527 | 4.919300444 | 4.91929946  |
| 0.155559322 | 5.377073863 | 14.95979563 | 4.926337445 | 4.926333733 |
| 2.5938487   | 4.18026103  | 14.94545987 | 3.5950769   | 3.595076885 |
| 0.264102828 | 5.431611239 | 15.00632471 | 4.086282128 | 4.086277345 |
| 0.007716823 | 5.749951509 | 15.90611704 | 5.955993321 | 5.955993113 |
| 1.845646559 | 6.152373577 | 15.39327504 | 4.786914755 | 4.786908877 |
| 2.872331562 | 7.487005844 | 16.12905739 | 4.660144553 | 4.660144325 |
| 4.495101844 | 3.720219273 | 16.62975092 | 4.842023109 | 4.842023929 |
| 2.948219566 | 5.132636727 | 15.76839719 | 4.120138659 | 4.120137541 |
| 2.225083761 | 9.960533193 | 15.26868033 | 5.437070528 | 5.43707095  |
| 1.409656974 | 6.563202886 | 15.91002968 | 3.766985937 | 3.766986316 |
| 3.791154732 | 4.231205411 | 15.91872721 | 3.220878673 | 3.22087845  |
| 1.976626753 | 8.139886995 | 16.340036   | 5.100011612 | 5.100011711 |
| 0.869267954 | 11.21847366 | 16.51570014 | 5.242888313 | 5.242889028 |
| 2.866977839 | 6.317379694 | 16.34518073 | 3.781421739 | 3.781421083 |
| 0.176501287 | 3.906584099 | 16.12615517 | 3.469497177 | 3.469495472 |
| 0.118102146 | 4.352633139 | 17.62901267 | 4.827224447 | 4.827221822 |
| 2.32946552  | 8.520798299 | 14.38771303 | 4.613714916 | 4.613716246 |
| 1.962255759 | 9.748504893 | 14.28953943 | 4.518136328 | 4.518137371 |
| 0           | 4.260556959 | 18.85355181 | 6.13241271  | 6.132415625 |
| 0.025531835 | 11.35284631 | 14.98632684 | 3.961286811 | 3.961286476 |
| 0           | 4.269803506 | 14.63714507 | 3.271830882 | 3.271830931 |
| 0.001219965 | 6.400252947 | 16.14695813 | 4.255590997 | 4.255590978 |
| 0.055515886 | 9.610463064 | 17.28639183 | 5.54196441  | 5.541962979 |
| 3.532164443 | 7.645298836 | 15.95381296 | 5.202723828 | 5.202724453 |
| 2.019292398 | 2.977543422 | 16.55656529 | 4.633394556 | 4.633395498 |
| 4.594631886 | 4.851797905 | 15.18385095 | 4.7526278   | 4.700206365 |
| 1.218650126 | 4.861419639 | 16.7165403  | 2.288393266 | 2.288393512 |
| 0.272047727 | 5.3763776   | 17.29446559 | 4.932804205 | 4.932796874 |
| 2.124908958 | 4.287013712 | 15.76382949 | 4.156982537 | 4.156983039 |
| 1.892023467 | 4.565162172 | 15.23755107 | 3.193319448 | 3.193319554 |
| 0           | 7.106929847 | 16.80759498 | 4.727371202 | 4.727371836 |
| 0           | 10.3350839  | 16.76596261 | 4.551896529 | 4.551898709 |
| 1.084347165 | 8.960358463 | 16.77190938 | 5.220807111 | 5.220806617 |
| 0.003943389 | 3.483387985 | 16.95547565 | 3.931340867 | 3.931340818 |
| 0.023184782 | 4.390248449 | 16.54980529 | 4.66626027  | 4.666259826 |
| 0           | 4.053802334 | 14.64880031 | 4.120626419 | 4.120627102 |
| 0.637305098 | 6.538609517 | 16.41371126 | 5.140812983 | 5.140814769 |
| 1.339439475 | 4.907708488 | 14.96946955 | 5.214697442 | 5.214695257 |
| 0           | 10.63747299 | 16.48344411 | 5.557131362 | 5.557134592 |
| 0           | 3.740139283 | 16.18825021 | 2.986496896 | 2.986497047 |
| 2.311384159 | 8.923723029 | 16.5054244  | 4.468203873 | 4.468205158 |
| 2.682895088 | 8.626060493 | 15.03047958 | 4.2493574   | 4.249357732 |

|             |             |             |             |             |
|-------------|-------------|-------------|-------------|-------------|
| 0.05033657  | 8.951325557 | 17.17775236 | 4.621446203 | 4.621445234 |
| 1.457211296 | 3.324123626 | 16.7149649  | 4.881471178 | 4.88147295  |
| 3.634007729 | 11.31804671 | 16.17085655 | 3.510947472 | 3.5109466   |
| 0           | 4.487885202 | 16.99537658 | 2.755093166 | 2.755093221 |
| 2.903845598 | 9.159619569 | 14.37208565 | 5.700442913 | 5.700441202 |
| 0.029901037 | 6.187395214 | 16.61675107 | 4.180477868 | 4.180477414 |
| 2.425048204 | 8.595259179 | 15.04914504 | 3.705025361 | 3.705025149 |
| 0           | 7.892315333 | 16.1824973  | 4.806920287 | 4.806922255 |
| 4.480276964 | 2.951834873 | 14.85311398 | 3.814399567 | 3.814394354 |
| 2.394988904 | 3.263185224 | 16.67850077 | 3.035226592 | 3.035226256 |
| 4.118638687 | 3.587952597 | 16.07402923 | 4.524930955 | 4.524930567 |
| 0.078403975 | 5.268139351 | 16.98619695 | 4.029853596 | 4.029852463 |
| 0.018909646 | 9.221833334 | 15.41665726 | 4.022114974 | 4.022114716 |
| 1.665687182 | 4.665714104 | 15.17592544 | 4.769066646 | 4.769062405 |
| 2.885004523 | 3.67221681  | 16.28087637 | 4.613330598 | 4.61333033  |
| 3.281175191 | 5.537962579 | 15.98851626 | 4.202231676 | 4.202231783 |
| 0.067244097 | 6.865555665 | 14.9282263  | 3.374936679 | 3.374936167 |
| 2.255094249 | 4.062475736 | 16.19887269 | 5.025166354 | 5.025168094 |
| 0           | 5.141903034 | 16.31361373 | 5.926189842 | 5.926189957 |
| 0.078461147 | 9.31662623  | 15.60421195 | 5.919184626 | 5.919182398 |
| 1.443001224 | 7.726728248 | 15.56578549 | 4.560847863 | 4.5608455   |
| 3.156752592 | 8.650553141 | 17.35787479 | 5.373506633 | 5.373508965 |
| 0.691173276 | 8.906997691 | 15.29118466 | 4.468293469 | 4.468294673 |
| 3.017547526 | 6.996551259 | 15.8130621  | 5.068691802 | 5.068693807 |
| 0.1345449   | 12.32652584 | 15.67767785 | 4.987649258 | 4.987646048 |
| 0           | 3.91136394  | 15.23732815 | 3.82441014  | 3.824410446 |
| 1.992856722 | 10.46283722 | 16.41100983 | 3.680984117 | 3.680983086 |
| 0.062614079 | 8.932686825 | 16.51187482 | 4.365251556 | 4.365250472 |
| 2.408997408 | 3.686179261 | 17.32795604 | 3.42204408  | 3.42204395  |
| 0.009670651 | 5.734307293 | 16.8739261  | 3.96644768  | 3.966447554 |
| 2.567156042 | 11.30375796 | 12.94731773 | 3.969139652 | 3.969140503 |
| 0           | 2.689034765 | 18.44222978 | 4.869784431 | 4.869784826 |
| 0           | 5.434660101 | 16.21594885 | 4.528879825 | 4.528879979 |
| 1.098172812 | 5.990289563 | 16.24997359 | 4.73873354  | 4.738733047 |
| 1.559860922 | 6.232382396 | 16.8797682  | 4.288623686 | 4.288623768 |
| 0.094893584 | 4.866005476 | 15.85997364 | 5.244031924 | 5.244029571 |
| 2.979409356 | 7.629384857 | 15.47022609 | 3.91176773  | 3.911766661 |
| 2.049101755 | 6.830891908 | 17.3082098  | 3.518270308 | 3.518270224 |
| 3.929017653 | 6.551083259 | 16.23302697 | 4.916994267 | 4.916996214 |
| 0           | 4.704412302 | 15.9007588  | 4.396699922 | 4.396701287 |
| 1.715551375 | 6.806848959 | 15.60266262 | 3.869059439 | 3.869059094 |
| 3.245586862 | 8.438407582 | 13.03529317 | 3.616433497 | 3.616434516 |
| 0.067530906 | 4.089600041 | 14.72357849 | 4.197303125 | 4.197302052 |
| 0           | 4.591311273 | 14.99834039 | 4.185487764 | 4.185489428 |
| 0.073793242 | 3.582008934 | 15.58735119 | 4.5141689   | 4.514167514 |
| 3.219066548 | 8.796095882 | 15.63451335 | 4.337209925 | 4.337209224 |
| 3.023273657 | 5.114493715 | 17.20236669 | 4.113817663 | 4.113817602 |
| 0           | 4.233962598 | 17.038761   | 5.125009988 | 5.125010511 |
| 0           | 5.072979046 | 15.15710599 | 4.026658493 | 4.026659477 |
| 0           | 3.294970473 | 15.60334956 | 4.386304541 | 4.386305493 |
| 3.623536167 | 10.69264347 | 14.27414283 | 5.014658669 | 5.01466115  |
| 3.56570231  | 9.521351862 | 15.28986139 | 4.274809977 | 4.274809223 |
| 2.25111003  | 6.000424262 | 16.71020494 | 4.003642538 | 4.00364271  |
| 3.87635726  | 10.17294305 | 15.79802096 | 5.872335    | 5.872335139 |
| 2.439350303 | 3.009397846 | 16.40328438 | 3.832088831 | 3.832089126 |
| 1.592441961 | 11.86888655 | 16.53284573 | 4.525076651 | 4.525077862 |
| 1.13009095  | 7.457021572 | 15.55817639 | 3.516999676 | 3.516999382 |
| 2.052127317 | 8.582603484 | 15.0733779  | 4.260872823 | 4.260873534 |

| hsa-miR-3677-3p | hsa-miR-671-5p | hsa-miR-4652-5p | hsa-miR-4661-5p | hsa-miR-421 |
|-----------------|----------------|-----------------|-----------------|-------------|
| 4.404685586     | 4.302804964    | 0.10800569      | 4.199742986     | 3.949410941 |
| 3.49651449      | 3.49602073     | 0.069713886     | 2.293726546     | 3.789448073 |
| 3.975209496     | 3.751281389    | 0.033441298     | 4.631350423     | 4.562024887 |
| 4.412080657     | 4.675339745    | 4.549738722     | 3.256796254     | 4.337701975 |
| 1.371469403     | 3.985547054    | 0.116990301     | 4.344954499     | 2.025893997 |
| 5.705483902     | 3.03594503     | 0.04876592      | 4.947337424     | 2.540696501 |
| 3.238975214     | 2.96098819     | 0.157974716     | 5.998249855     | 2.616783447 |
| 3.806185128     | 3.806013501    | 0.020795787     | 3.102513078     | 3.690039254 |
| 1.495706315     | 3.885690195    | 0               | 2.890663732     | 3.792966288 |
| 5.691808425     | 5.723632405    | 5.138029113     | 6.712037551     | 5.088462608 |
| 4.21712545      | 5.384211794    | 0               | 3.280267296     | 4.61765088  |
| 4.069931378     | 3.456799762    | 0.222663616     | 5.020865045     | 1.670111322 |
| 1.992664447     | 3.652076009    | 0.107376236     | 5.415871787     | 3.050048833 |
| 3.431676642     | 4.141536539    | 0               | 4.725886097     | 6.629231071 |
| 5.668760195     | 5.391260548    | 0.188351984     | 3.960583683     | 3.95162184  |
| 3.787995958     | 2.508096971    | 0.041154014     | 3.905610017     | 4.205092289 |
| 4.307212905     | 4.969687529    | 0               | 4.988965584     | 3.556459648 |
| 3.418107513     | 3.473688379    | 1.537381564     | 1.896551818     | 3.474077055 |
| 3.533333885     | 3.532764918    | 0.078320536     | 3.957264411     | 2.32758324  |
| 2.889666587     | 3.238731735    | 5.448334891     | 4.997831997     | 4.557356162 |
| 3.726699085     | 3.725249588    | 5.278245897     | 6.019244485     | 5.211407283 |
| 3.660157383     | 1.840233547    | 0.287775688     | 6.245263353     | 3.022461864 |
| 4.045915785     | 3.133446752    | 0.027400095     | 5.698585446     | 4.66404411  |
| 2.120059753     | 4.548005621    | 0.144940013     | 3.426914718     | 2.571924253 |
| 4.964223559     | 3.417585068    | 0.143563316     | 3.953565203     | 3.417222294 |
| 4.478174378     | 4.607398918    | 0               | 4.794042613     | 3.658569257 |
| 4.873692531     | 5.096079302    | 0               | 6.05360407      | 6.233415738 |
| 4.381645666     | 2.588679635    | 0.06016105      | 4.943924605     | 2.255994924 |
| 2.346655503     | 3.847576237    | 0.083211644     | 2.955665874     | 1.907039283 |
| 3.776250792     | 4.442371813    | 0.038652487     | 1.127499783     | 2.167998449 |
| 3.414501982     | 3.784018785    | 3.414842403     | 5.102433125     | 4.284375926 |
| 3.169477272     | 2.80691856     | 0               | 4.391846056     | 4.458964476 |
| 4.130908161     | 3.827018187    | 0               | 3.577247533     | 1.632807012 |
| 3.514729986     | 3.925198032    | 0               | 6.188637853     | 4.457191738 |
| 3.600546957     | 4.441765571    | 0.094441564     | 4.535294875     | 3.894207529 |
| 3.617031173     | 4.38528388     | 7.37884536      | 7.560312879     | 4.22709317  |
| 3.34688568      | 4.959355616    | 0.124449919     | 0.127971422     | 2.84025491  |
| 1.749412342     | 2.528910566    | 0               | 4.395022992     | 4.221927177 |
| 3.373629238     | 3.546345608    | 0.081541803     | 6.072953589     | 4.292857494 |
| 4.568118437     | 4.863812315    | 0.020974085     | 6.220084434     | 5.35728281  |
| 5.464002078     | 3.242828551    | 0.097977326     | 6.495314959     | 4.261420649 |
| 5.223191633     | 3.103125461    | 0.064199452     | 5.813472468     | 5.563922138 |
| 3.873912551     | 4.366580332    | 0.124009388     | 4.740819315     | 4.257680938 |
| 1.813727714     | 5.041188943    | 0.057893197     | 3.273359114     | 3.598251131 |
| 3.360106361     | 3.706742344    | 0               | 5.321446867     | 4.146107313 |
| 5.007898491     | 3.055443865    | 5.760725987     | 3.205977336     | 2.69583274  |
| 5.83616739      | 4.500599516    | 5.659353277     | 4.794469191     | 4.499963329 |
| 3.06579201      | 3.576305768    | 1.576189369     | 6.252401127     | 3.951540626 |
| 3.964233404     | 2.006523555    | 5.160996438     | 2.45232878      | 3.065451201 |
| 4.906653164     | 5.025489233    | 5.099062254     | 6.98214374      | 4.907270301 |
| 4.768665796     | 2.820136067    | 0.002578789     | 6.714549743     | 3.920393618 |
| 3.736455339     | 4.216073729    | 0.657974805     | 3.418817742     | 3.737436922 |
| 4.507997159     | 3.248188735    | 4.962105306     | 6.376338475     | 6.285547071 |
| 4.012325366     | 3.56304625     | 0.020593133     | 4.631375023     | 3.689043117 |
| 2.875021089     | 3.529670194    | 0.01383606      | 3.771850238     | 3.068512113 |
| 3.71238205      | 4.264139881    | 4.144401797     | 7.0007436       | 3.436582875 |

|             |             |             |             |             |
|-------------|-------------|-------------|-------------|-------------|
| 3.212496864 | 3.617697194 | 1.718536495 | 3.683008132 | 3.213313821 |
| 3.112050819 | 1.418018924 | 0           | 4.172589424 | 2.962200283 |
| 4.814983234 | 4.664781962 | 5.847505824 | 4.139314076 | 3.59396013  |
| 5.669580645 | 3.828297997 | 0           | 5.2257133   | 6.1503813   |
| 4.260220964 | 1.722909844 | 5.46090758  | 5.906184988 | 3.870905472 |
| 4.682071013 | 3.641532991 | 0           | 4.584194653 | 4.123496817 |
| 3.855571284 | 3.922495002 | 0           | 3.919088202 | 3.379332486 |
| 2.363458512 | 3.044131041 | 0.008852272 | 3.214712342 | 2.627653834 |
| 6.466444222 | 3.660646252 | 0           | 5.450240235 | 2.769512294 |
| 4.959807896 | 1.837847656 | 0.064328275 | 4.403126133 | 1.837858944 |
| 3.989434398 | 4.197033056 | 0.059680789 | 3.874719218 | 2.586616203 |
| 3.678166894 | 3.562820601 | 0           | 2.786148147 | 3.884509756 |
| 5.101921442 | 3.5585608   | 4.365264783 | 5.949457626 | 4.673297183 |
| 2.746068823 | 4.492303627 | 0           | 4.000893831 | 3.649935115 |
| 4.348970298 | 3.215787662 | 0           | 5.279423981 | 3.891002568 |
| 4.91722336  | 3.259286482 | 0.055014919 | 3.853523206 | 3.259164968 |
| 3.805124159 | 4.999545024 | 0.196180561 | 4.928948354 | 3.602434499 |
| 5.139703456 | 4.01020098  | 5.534003618 | 4.917382013 | 4.097680829 |
| 3.5549401   | 2.721174373 | 0.350180578 | 4.774041792 | 3.196185509 |
| 4.295747289 | 3.954212692 | 0.009115147 | 3.216026862 | 3.631745855 |
| 4.645483116 | 3.727858366 | 0.311822947 | 5.469833926 | 3.090797479 |
| 0.014276418 | 3.980351837 | 3.980426673 | 2.653346664 | 3.39374176  |
| 2.734997707 | 3.530591919 | 6.356154823 | 7.030312677 | 4.177612786 |
| 4.00061415  | 3.872476169 | 1.287604659 | 2.70658285  | 2.705729045 |
| 4.58484537  | 4.691809319 | 4.528459724 | 6.553905815 | 5.991956844 |
| 2.372355017 | 3.09673853  | 0           | 4.569203347 | 3.577202827 |
| 3.811436312 | 3.21994794  | 2.199303609 | 3.812824892 | 2.798241952 |
| 3.779037906 | 4.36361415  | 0           | 4.82874949  | 3.67228604  |
| 3.254241709 | 4.311479645 | 0           | 2.800269417 | 4.311612778 |
| 3.313389205 | 2.618320656 | 0.067339712 | 3.781845062 | 3.116390676 |
| 1.675245267 | 3.463424963 | 0.224721947 | 2.370152596 | 4.073665758 |
| 2.125041377 | 4.098657693 | 0.14644911  | 5.42010437  | 3.427803659 |
| 3.847143654 | 3.778492593 | 2.65491338  | 4.253880596 | 2.934929068 |
| 5.444881371 | 3.045743407 | 0           | 4.952726065 | 3.744246083 |
| 4.379526336 | 4.008059896 | 0.507811919 | 5.28860157  | 5.043831555 |
| 4.679222186 | 4.060213827 | 0.030392334 | 2.953362012 | 2.952853331 |
| 2.951009697 | 3.120444549 | 0           | 3.649382719 | 2.275998274 |
| 3.329306899 | 4.592617606 | 0.001436987 | 4.007622122 | 3.592416098 |
| 2.616942033 | 4.572967224 | 0.066956263 | 5.332816146 | 2.887196441 |
| 4.513701107 | 4.457640714 | 7.810749635 | 5.537305062 | 3.279832828 |
| 5.490507119 | 5.157687108 | 3.11126464  | 4.879329442 | 5.219186906 |
| 2.27404469  | 4.116289035 | 0           | 4.530341752 | 3.532345594 |
| 2.893220124 | 3.91048438  | 3.317341122 | 5.426725926 | 4.50019367  |
| 3.871640394 | 4.783673389 | 0.362066118 | 5.617452138 | 3.583293752 |
| 5.462275748 | 2.947116323 | 3.471311587 | 0.856694696 | 2.947184139 |
| 4.037381287 | 2.683589332 | 0           | 5.929024467 | 4.910156479 |
| 2.957281815 | 4.025769532 | 0           | 2.382606574 | 4.300200502 |
| 4.138815752 | 4.61305302  | 0           | 3.430114372 | 4.282613513 |
| 3.448741623 | 4.938971319 | 3.448671347 | 5.040280426 | 1.688602498 |
| 5.417249609 | 3.193479989 | 0.004650355 | 5.112573887 | 2.607505258 |
| 2.71511954  | 3.458563852 | 0.027570315 | 5.899942364 | 3.45849515  |
| 4.41568409  | 3.575363855 | 2.49662324  | 4.465484872 | 2.99934902  |
| 4.791516449 | 3.385536713 | 0           | 5.603781909 | 4.073953714 |
| 1.99944128  | 5.208732908 | 0.109324977 | 5.099922936 | 3.287460278 |
| 3.11567315  | 4.011841084 | 0           | 2.892057618 | 3.046328494 |
| 3.121979383 | 3.464831886 | 0           | 2.270359032 | 2.838637407 |
| 4.01645184  | 4.017247876 | 6.549036311 | 4.777700011 | 3.827491658 |
| 4.664091707 | 2.455595929 | 4.943817368 | 4.027591741 | 3.859493569 |

|             |             |             |             |             |
|-------------|-------------|-------------|-------------|-------------|
| 3.876827876 | 4.382869867 | 0.06057181  | 7.047804688 | 4.544045252 |
| 4.009941702 | 3.233889278 | 0           | 3.770014442 | 2.801803929 |
| 4.526920324 | 2.465310739 | 7.430822427 | 7.876555998 | 4.613539861 |
| 4.881256952 | 3.872638223 | 0           | 3.659022644 | 4.328863021 |
| 4.692984272 | 3.948650109 | 6.441702622 | 4.899658323 | 4.538792334 |
| 2.48428941  | 4.428027083 | 0.035661072 | 5.829321708 | 2.751587516 |
| 2.104609846 | 2.921768403 | 0.023699307 | 2.697453562 | 2.921729472 |
| 6.161270228 | 3.012700354 | 0           | 6.142473261 | 6.476069935 |
| 0.446171773 | 0.442262374 | 5.883386248 | 3.817810946 | 4.081249467 |
| 4.384537011 | 1.977674622 | 0.103078571 | 3.638440536 | 3.033325582 |
| 1.68908397  | 4.21813405  | 7.12241204  | 4.525198592 | 3.296174057 |
| 3.604963785 | 4.352221711 | 0.095519694 | 3.902905361 | 3.603971913 |
| 6.117639739 | 4.63950992  | 0.022444785 | 5.733516755 | 3.433837123 |
| 0.234286461 | 5.660948599 | 0.233640677 | 3.499518787 | 3.491277274 |
| 5.482366996 | 3.994705229 | 4.67415974  | 3.255550077 | 4.087981787 |
| 4.124554925 | 2.956913343 | 6.461439337 | 6.721182598 | 3.861949014 |
| 2.675936503 | 2.675674442 | 0.081520907 | 3.971109641 | 2.675571778 |
| 2.853517905 | 4.172019506 | 6.19884385  | 6.989229648 | 4.913238834 |
| 3.673624093 | 3.879928737 | 0           | 6.238655426 | 3.43292914  |
| 3.233837198 | 6.008630468 | 0.095591763 | 3.607759563 | 4.617611832 |
| 3.429568925 | 3.958494339 | 0.146550443 | 5.054538171 | 4.226488421 |
| 3.515038247 | 3.113383949 | 0           | 3.768582901 | 4.980466538 |
| 5.167267191 | 3.078417649 | 0           | 5.610288501 | 2.512742627 |
| 2.472542234 | 4.455719007 | 0           | 3.948938824 | 4.494216647 |
| 3.274678119 | 3.705719709 | 0.168075105 | 4.989910951 | 3.505478077 |
| 3.412780831 | 3.633858532 | 0.890046238 | 2.424511383 | 2.833682248 |
| 6.721712947 | 4.426905279 | 0.113803368 | 6.446364973 | 3.304896683 |
| 4.757948511 | 4.362067797 | 0.075753236 | 2.924974146 | 5.366921334 |
| 2.414158997 | 3.097864884 | 2.414145375 | 3.686423382 | 2.414107141 |
| 4.704071743 | 3.86634016  | 0.011432681 | 6.631589487 | 4.22945134  |
| 6.909519974 | 4.507439971 | 0           | 7.425134599 | 4.316567499 |
| 2.688256441 | 2.879193681 | 0.919663197 | 4.514147649 | 5.04069117  |
| 2.947476785 | 3.530809501 | 0           | 4.336362531 | 3.116895006 |
| 3.733928829 | 3.469026865 | 0.029763968 | 1.098720203 | 3.849684153 |
| 2.77642335  | 3.289970954 | 0           | 6.155700948 | 2.292494083 |
| 2.024083028 | 5.180726859 | 0.116457525 | 5.067435491 | 1.370286433 |
| 3.44054438  | 4.261113605 | 4.919570692 | 4.461128306 | 3.012667432 |
| 2.640271865 | 2.863692654 | 0.011495768 | 3.644192992 | 3.759500698 |
| 4.714173312 | 3.49057532  | 0           | 3.487290738 | 3.249722888 |
| 4.113521978 | 3.757237983 | 4.215726771 | 5.451640004 | 4.166585658 |
| 5.873405934 | 2.146593546 | 8.499573615 | 6.848152659 | 4.926014988 |
| 3.993859199 | 4.253734295 | 6.114726079 | 4.324367607 | 4.778685659 |
| 3.548362631 | 3.177435526 | 0.081878959 | 6.016599231 | 3.547543068 |
| 2.540097824 | 2.86883335  | 0           | 5.025118783 | 2.767562636 |
| 4.747464625 | 6.014127801 | 0.089719401 | 4.822763134 | 3.209350374 |
| 2.546676133 | 3.702471531 | 4.709170791 | 2.546720196 | 3.563426713 |
| 4.11368048  | 3.93293311  | 4.485840281 | 4.274438489 | 3.024979758 |
| 2.441957757 | 3.307186874 | 0           | 6.085993916 | 3.431912034 |
| 3.62010119  | 2.300821506 | 1.176530043 | 3.537101629 | 2.090603175 |
| 3.181401344 | 3.676177856 | 0           | 3.398330952 | 3.676367212 |
| 5.636702504 | 3.442762838 | 6.954147879 | 4.595690741 | 5.221541108 |
| 3.588869893 | 3.434531138 | 5.978773465 | 3.436129937 | 2.839295674 |
| 3.37789321  | 3.824038156 | 0           | 3.617669129 | 2.920698424 |
| 2.968083218 | 3.552066364 | 0           | 3.289274325 | 4.358668039 |
| 4.474118887 | 3.641448104 | 6.017963104 | 5.709031341 | 3.009046096 |
| 4.612000885 | 4.768051238 | 8.593707085 | 6.329803437 | 4.073545183 |
| 5.72660689  | 2.172598531 | 6.412748762 | 4.10681701  | 4.724031471 |
| 3.590264066 | 4.138290834 | 2.510825215 | 4.627279953 | 5.318023397 |

| hsa-miR-217-5p | hsa-miR-301a-3p | hsa-miR-18a-5p | hsa-miR-454-3p | hsa-miR-19a-3p |
|----------------|-----------------|----------------|----------------|----------------|
| 9.989121265    | 4.828951706     | 6.450557819    | 5.418499814    | 7.999652196    |
| 11.3826258     | 5.772848446     | 8.992996912    | 5.932082725    | 11.10231228    |
| 7.471971595    | 4.816303409     | 5.667160656    | 5.302938269    | 8.143384481    |
| 8.001118542    | 6.485154911     | 7.528523923    | 6.070002227    | 7.964557011    |
| 11.77727002    | 4.791130264     | 5.134525506    | 5.455699487    | 7.302350572    |
| 4.414111321    | 2.209581077     | 4.149899931    | 4.331276783    | 4.770551478    |
| 9.260845115    | 3.241816791     | 4.608671818    | 4.789363117    | 7.440559103    |
| 11.59953636    | 4.195175135     | 5.016901538    | 4.50086879     | 5.754963081    |
| 7.565828683    | 5.011340996     | 6.810549396    | 5.92547497     | 9.286355767    |
| 6.144468639    | 6.323347418     | 9.004072743    | 4.229654886    | 9.308776244    |
| 11.97032452    | 5.270720232     | 6.182873468    | 5.494821285    | 7.455473255    |
| 9.583925818    | 3.46367755      | 5.110636659    | 3.699161045    | 5.758963575    |
| 8.918956324    | 4.079599397     | 4.828761346    | 3.481374967    | 6.668448949    |
| 14.0094124     | 6.671001698     | 10.26712911    | 5.462583729    | 10.05093646    |
| 6.191359725    | 6.110452693     | 7.883992798    | 6.318355835    | 9.257587862    |
| 11.70889042    | 5.421109353     | 8.458993758    | 5.255756719    | 9.515820556    |
| 6.517744569    | 5.271832577     | 5.203133946    | 4.908738435    | 5.659011124    |
| 11.93982846    | 3.469265091     | 4.070172477    | 3.469194615    | 5.593300818    |
| 13.11263486    | 3.361692426     | 4.968694126    | 3.69007581     | 7.346571769    |
| 16.52926299    | 3.763334879     | 6.191972017    | 3.763532761    | 6.887354676    |
| 7.415364881    | 3.907869625     | 6.303318201    | 3.908030597    | 7.693627307    |
| 8.115620153    | 4.835963371     | 4.593328917    | 5.675734718    | 6.933538452    |
| 6.1678306      | 4.046836069     | 4.84359951     | 4.727279548    | 7.530226629    |
| 14.27932793    | 4.345909243     | 5.306426154    | 5.518105715    | 8.496924999    |
| 15.01006615    | 4.449542172     | 5.947938907    | 4.449741388    | 9.226325555    |
| 11.94571601    | 3.805084266     | 3.301000569    | 4.682406689    | 4.38189802     |
| 5.010756943    | 5.77356355      | 8.353712013    | 4.667057564    | 8.420930551    |
| 13.10661863    | 4.69095489      | 5.589674537    | 4.29598144     | 6.306538151    |
| 3.849308202    | 5.047588211     | 4.399783721    | 4.862096541    | 7.221652767    |
| 5.522633421    | 5.447440987     | 6.542336711    | 5.814900331    | 9.083649638    |
| 9.521062981    | 4.966379064     | 7.462038736    | 4.587141895    | 7.696958799    |
| 14.49286518    | 5.523082948     | 5.584480406    | 5.780879609    | 8.404652883    |
| 7.665692428    | 4.62480269      | 4.125728843    | 4.488836165    | 7.077945895    |
| 9.221095455    | 4.91465994      | 7.417512646    | 4.722982721    | 7.70774128     |
| 11.08336797    | 5.036977493     | 5.502099369    | 5.454609638    | 7.740996363    |
| 16.65223489    | 3.624614256     | 5.359203269    | 5.565443345    | 8.308055101    |
| 6.421542193    | 4.374725699     | 4.824108564    | 5.03517775     | 7.840765956    |
| 13.97381825    | 4.501370779     | 8.715950633    | 4.551645344    | 8.536295535    |
| 7.883393283    | 5.097159609     | 3.971697356    | 5.82615653     | 6.237460273    |
| 10.34001099    | 4.356993475     | 6.220878919    | 5.240037503    | 7.398514946    |
| 6.35960791     | 6.495058778     | 6.030100316    | 6.581611288    | 8.345088951    |
| 5.815530344    | 3.104375747     | 4.120457683    | 3.628452019    | 5.968414645    |
| 7.839100625    | 5.622339289     | 4.96852575     | 5.827154469    | 6.230281195    |
| 10.6964835     | 6.074053909     | 7.307883212    | 6.175626738    | 9.358957468    |
| 11.37252614    | 6.023981779     | 8.037972481    | 6.003191878    | 8.25497275     |
| 10.02023629    | 5.920984047     | 7.421917088    | 5.269469572    | 7.757321753    |
| 14.40146697    | 5.170889406     | 7.6606889      | 5.032113252    | 8.622202645    |
| 10.01542179    | 4.984383924     | 5.283533901    | 5.210199275    | 8.109425686    |
| 16.80373293    | 3.827475306     | 5.483462066    | 3.96802524     | 8.777239369    |
| 7.786909748    | 3.245747357     | 7.683553671    | 4.100925518    | 7.819976387    |
| 7.164011194    | 4.768783064     | 5.336001364    | 4.26168112     | 7.262198552    |
| 10.92583316    | 6.414309095     | 8.08987148     | 5.852446129    | 9.464941497    |
| 11.13319627    | 4.722865442     | 3.575934056    | 4.965044057    | 5.311696778    |
| 9.810267485    | 3.425469438     | 5.467207065    | 4.4292817      | 6.956438294    |
| 8.424282548    | 4.596646357     | 5.829543328    | 5.073668504    | 7.908346219    |
| 6.334351634    | 5.135634058     | 5.282168346    | 4.658759566    | 6.639015124    |

|             |             |             |             |             |
|-------------|-------------|-------------|-------------|-------------|
| 14.75311759 | 4.4476123   | 5.724052206 | 3.929395691 | 5.921410073 |
| 4.422963085 | 6.461282639 | 4.238943037 | 6.705281741 | 7.832569093 |
| 7.048456316 | 4.620091128 | 7.343147604 | 5.042425897 | 7.336065215 |
| 5.642930939 | 5.200019596 | 7.171323292 | 4.743459515 | 6.685923006 |
| 16.77994569 | 4.173616569 | 4.984778347 | 3.75610681  | 7.087808803 |
| 13.36975221 | 1.776243002 | 5.045229303 | 2.558070715 | 6.938213222 |
| 11.80115832 | 3.634512078 | 4.906975045 | 5.033491102 | 6.055791276 |
| 13.19885738 | 4.134054499 | 5.217714126 | 3.504936486 | 6.842884729 |
| 16.03053506 | 4.602719894 | 6.465643707 | 5.167959241 | 5.935229838 |
| 10.19196301 | 3.895557138 | 6.834298759 | 3.768478205 | 7.604145016 |
| 10.54215222 | 3.991399236 | 5.158266004 | 5.105920771 | 7.681175832 |
| 6.499988939 | 3.678056742 | 5.18616023  | 4.620861582 | 5.262082768 |
| 13.32009417 | 5.672676811 | 5.699981369 | 4.972423256 | 7.302696815 |
| 14.40354521 | 4.594985902 | 6.10647302  | 4.241944094 | 8.064148564 |
| 13.80477058 | 4.137275907 | 5.056847512 | 4.059494094 | 6.500041418 |
| 5.408417614 | 3.587326553 | 4.272954636 | 4.44346652  | 6.675111661 |
| 7.728824406 | 5.012373284 | 5.377007089 | 6.439981989 | 7.728636005 |
| 9.632843024 | 4.01028165  | 4.964737494 | 3.710613434 | 6.119209728 |
| 11.50537867 | 3.85076398  | 4.092820448 | 3.205866849 | 5.672646292 |
| 8.126898245 | 7.869620072 | 7.831279197 | 7.441771026 | 8.754003801 |
| 8.461837159 | 3.098163296 | 4.667537616 | 4.791027    | 8.905751055 |
| 6.26694356  | 3.65811289  | 5.398436823 | 4.775934302 | 7.325490521 |
| 5.685672805 | 4.521080226 | 6.814953101 | 5.754031246 | 8.377385687 |
| 16.96474103 | 3.736008545 | 5.075766365 | 4.120888311 | 7.429742927 |
| 11.40167385 | 6.373451137 | 7.993966406 | 5.525950409 | 7.202089269 |
| 9.433795267 | 3.095978348 | 4.968943715 | 3.67442545  | 7.427531985 |
| 15.76796272 | 3.547063964 | 3.929562473 | 4.137371819 | 4.758253734 |
| 8.362265013 | 4.55587803  | 6.16004306  | 5.015084563 | 8.10439885  |
| 7.715286779 | 3.598145093 | 7.027375905 | 3.598123611 | 7.968405016 |
| 13.06030185 | 4.234458214 | 6.799906873 | 4.025905419 | 8.927782973 |
| 13.85140412 | 1.671646162 | 5.412431646 | 3.188614641 | 6.049630843 |
| 7.588409641 | 5.121692747 | 5.477497663 | 6.128682259 | 8.430879318 |
| 15.72529256 | 5.054518658 | 5.389740396 | 3.973794699 | 6.4083801   |
| 9.654449708 | 4.26590678  | 4.916668684 | 4.691256988 | 5.172307671 |
| 5.32429413  | 6.822018877 | 6.747812322 | 6.710300682 | 7.894587702 |
| 6.137928425 | 4.242923945 | 4.74277502  | 4.548965199 | 7.044256935 |
| 8.954239632 | 4.118045665 | 4.75455923  | 4.035698257 | 7.155469868 |
| 9.057843323 | 5.095255649 | 5.329782979 | 4.762645442 | 6.030282616 |
| 12.03011591 | 4.974974627 | 6.404129891 | 5.377371913 | 8.485534951 |
| 16.40346725 | 5.938249791 | 6.588436255 | 4.98038189  | 9.580546937 |
| 13.79972514 | 4.587304154 | 5.534081924 | 5.357418557 | 5.775955891 |
| 8.052121097 | 4.193740153 | 5.921439547 | 4.530341964 | 9.052081419 |
| 9.917768825 | 4.504092593 | 6.494170919 | 4.921981643 | 7.073897248 |
| 7.265420191 | 4.807351574 | 6.251722657 | 5.764244767 | 7.996693165 |
| 15.21361961 | 4.156688674 | 5.116896886 | 5.045927105 | 7.139378492 |
| 6.827095978 | 4.450260514 | 6.219404555 | 3.774674544 | 7.475679528 |
| 12.25050624 | 4.528454379 | 6.495910429 | 4.859745145 | 7.42511287  |
| 7.529587906 | 6.307454903 | 7.849327564 | 5.773198328 | 7.698847343 |
| 11.11807496 | 4.717634981 | 5.178665213 | 4.453929842 | 7.80915639  |
| 7.625597788 | 5.85815819  | 7.244773909 | 5.858168449 | 9.694623445 |
| 9.976095355 | 4.311776219 | 6.355916827 | 4.843893075 | 7.297047098 |
| 15.09600247 | 5.382014771 | 7.631654517 | 5.298096922 | 8.633334408 |
| 11.40167108 | 4.533179799 | 7.567108099 | 3.766570424 | 7.521781749 |
| 10.69004894 | 4.759680864 | 5.844858428 | 6.134787927 | 7.228835865 |
| 6.160257492 | 4.527785812 | 5.193111166 | 4.24352271  | 6.840609321 |
| 8.31733294  | 4.400774914 | 5.746779766 | 5.034637939 | 8.200592985 |
| 10.2038824  | 4.467439366 | 5.436088861 | 4.942509825 | 6.528007316 |
| 14.78456081 | 4.610642188 | 8.070937987 | 3.945486272 | 9.771585008 |

|             |             |             |             |             |
|-------------|-------------|-------------|-------------|-------------|
| 5.515077652 | 4.88653702  | 7.538322852 | 4.622117075 | 7.548662015 |
| 7.664553857 | 5.733445592 | 7.13455873  | 4.994800197 | 8.132183802 |
| 12.87836903 | 4.531918057 | 5.450752609 | 5.294315022 | 7.280176166 |
| 7.10399384  | 5.767046368 | 4.578590123 | 4.945554509 | 5.376119685 |
| 11.26607827 | 3.684718747 | 6.811466709 | 4.460179399 | 9.042550657 |
| 10.5447216  | 2.977637065 | 5.355641426 | 4.574873037 | 6.846348889 |
| 4.370654376 | 3.116412851 | 3.705186901 | 3.928592585 | 4.768082831 |
| 10.022034   | 4.888988448 | 8.369529424 | 4.522501256 | 8.014523838 |
| 7.834129355 | 4.550403013 | 6.143106175 | 5.282380196 | 9.925274841 |
| 6.082607441 | 4.947111341 | 4.735859235 | 4.179434779 | 7.631607837 |
| 17.82811789 | 3.125558193 | 6.982329806 | 4.131561058 | 8.246053976 |
| 9.344543816 | 3.235206346 | 4.703756918 | 4.539870221 | 7.399885953 |
| 8.465406635 | 5.072186598 | 6.207438853 | 4.576497879 | 6.675047543 |
| 13.91317796 | 2.865122867 | 5.570464611 | 4.662506209 | 7.717527173 |
| 13.75706282 | 3.084679813 | 7.272410779 | 4.549269845 | 8.612562191 |
| 12.70775364 | 2.956787519 | 5.275082462 | 3.762223603 | 6.491785109 |
| 14.92156565 | 4.56274287  | 6.31104033  | 4.981046928 | 7.674039948 |
| 14.2289938  | 4.217618049 | 5.47544942  | 4.265773972 | 7.558440342 |
| 11.54075314 | 5.257471009 | 6.161514976 | 5.059586311 | 8.475268901 |
| 16.59140882 | 6.416517531 | 5.268500317 | 6.076512356 | 7.038680233 |
| 10.59351045 | 4.352067628 | 5.883264486 | 5.365604364 | 7.769660742 |
| 8.429531173 | 5.352570351 | 7.899309514 | 4.175340698 | 8.316600612 |
| 8.711364956 | 5.438634092 | 7.996461093 | 4.890345831 | 9.287793353 |
| 9.055153866 | 4.908286372 | 8.823154226 | 4.963136326 | 10.27664527 |
| 9.684744912 | 3.511226584 | 4.914658686 | 5.203999145 | 8.494960963 |
| 11.75224416 | 3.824236371 | 4.726641243 | 4.465030122 | 6.81600268  |
| 11.95584272 | 3.837275172 | 5.237876693 | 4.527429247 | 5.446211762 |
| 8.996837868 | 4.063011895 | 7.950080659 | 2.924974237 | 9.387506513 |
| 15.68830533 | 4.351598576 | 5.235082094 | 5.720459146 | 8.2318302   |
| 8.586221083 | 3.517997477 | 5.015496691 | 3.643872717 | 6.419781053 |
| 9.298947945 | 5.356142083 | 5.582262448 | 3.96857892  | 6.650951376 |
| 5.798340992 | 3.959568443 | 5.225889166 | 4.82379235  | 7.197340385 |
| 5.300528671 | 4.114300629 | 4.467298079 | 3.64569865  | 7.393286491 |
| 3.469018442 | 4.613135858 | 4.678033753 | 5.012769017 | 6.802099799 |
| 5.638236059 | 4.358908762 | 4.054269752 | 4.425964743 | 5.392133411 |
| 7.570414638 | 5.634825385 | 5.910562553 | 6.072975961 | 8.647754789 |
| 15.33275828 | 3.61686129  | 4.634660197 | 5.110856202 | 6.203996257 |
| 8.999670741 | 5.553556936 | 4.646167686 | 5.616347615 | 7.927090005 |
| 7.071478356 | 5.58602526  | 7.132729205 | 5.212893795 | 7.255879036 |
| 11.88900275 | 4.306784414 | 7.217433778 | 4.438341217 | 7.632367015 |
| 13.28678062 | 5.634104653 | 6.198991569 | 5.698393348 | 6.919030679 |
| 10.87311987 | 5.422509861 | 8.610820305 | 3.841090805 | 8.74390354  |
| 6.866952002 | 4.642987792 | 5.989754525 | 4.089745054 | 8.023893939 |
| 8.313264601 | 4.469138401 | 5.422090645 | 4.562741803 | 7.930790636 |
| 9.765261188 | 4.332417985 | 7.128699231 | 4.6771427   | 9.014708795 |
| 14.81994236 | 5.160914679 | 6.902966187 | 5.577173319 | 9.200368956 |
| 10.63681151 | 5.699483707 | 7.104253768 | 6.349089911 | 8.570603736 |
| 7.450611672 | 4.698211676 | 5.744354288 | 5.124641853 | 7.610627369 |
| 14.17296909 | 4.604479141 | 6.445327288 | 4.718861589 | 7.51834452  |
| 10.64820988 | 4.041137449 | 5.657147104 | 4.04107148  | 6.059959673 |
| 13.55464474 | 6.323299302 | 5.523633828 | 6.206401552 | 6.568606761 |
| 15.52942809 | 5.234465604 | 5.984645053 | 4.181465785 | 8.591180081 |
| 8.616034733 | 4.003543167 | 5.305916645 | 5.043546135 | 6.95687952  |
| 8.722948896 | 6.155133007 | 8.794566823 | 5.693304909 | 10.23385208 |
| 16.88822529 | 3.918900424 | 5.440594348 | 4.956919674 | 6.868428875 |
| 9.131732957 | 4.48035653  | 4.724646154 | 5.539918779 | 6.627283842 |
| 15.41654566 | 4.726456562 | 5.205450116 | 4.788142955 | 6.793493518 |
| 14.09234527 | 5.130381289 | 7.25014267  | 4.841938106 | 6.560264213 |



| hsa-miR-1251-5p | hsa-miR-3127-5p | hsa-miR-500b-3p | hsa-miR-362-3p | hsa-miR-135a-5p |
|-----------------|-----------------|-----------------|----------------|-----------------|
| 3.276623624     | 3.808672906     | 3.27675559      | 4.304539783    | 3.813650836     |
| 3.645836098     | 4.140552622     | 2.292450452     | 4.034383909    | 4.144301042     |
| 0.0323078       | 2.474376681     | 1.719869013     | 3.867869781    | 1.110821336     |
| 4.410499212     | 4.790735798     | 5.259295871     | 5.135609561    | 5.221267157     |
| 0.112309415     | 3.688956273     | 2.024317159     | 2.47313037     | 3.089437552     |
| 6.349270717     | 2.540577567     | 3.229004335     | 4.888429617    | 8.326914904     |
| 0.151184659     | 1.491346162     | 2.61166017      | 5.344284015    | 5.663816716     |
| 2.68311864      | 3.425721225     | 4.10500922      | 3.806277342    | 3.273546283     |
| 2.480261511     | 3.472488609     | 3.69506045      | 3.693497708    | 3.972076724     |
| 0.044284528     | 3.682600291     | 3.806566916     | 3.544719677    | 0.046839        |
| 2.633914067     | 3.096818889     | 4.399726112     | 4.468756672    | 2.991262183     |
| 3.164918788     | 2.363583514     | 3.443385291     | 5.093840168    | 4.077418523     |
| 1.343746981     | 1.9926231       | 2.434631369     | 4.076375467    | 3.811100045     |
| 0               | 4.495033343     | 4.059511876     | 4.878042944    | 1.562800732     |
| 3.33253538      | 5.123128825     | 3.763798079     | 3.779131082    | 4.505437278     |
| 5.526883139     | 4.730350662     | 3.784945414     | 5.066980711    | 7.190354078     |
| 0               | 4.541622444     | 3.248740507     | 3.151911767    | 0               |
| 0               | 2.806672951     | 2.630806371     | 4.003594785    | 1.540370268     |
| 1.255119134     | 3.826006618     | 3.158803157     | 3.827808002    | 1.888428819     |
| 5.718482257     | 3.952418503     | 3.737246108     | 4.292391436    | 6.655824151     |
| 0.16593589      | 3.013905938     | 4.98269318      | 5.148087901    | 4.205563947     |
| 0.272731758     | 3.654918005     | 1.837549209     | 3.897206332    | 0.29708427      |
| 5.308936487     | 3.304502143     | 1.092155023     | 4.896437242    | 8.121894717     |
| 1.454118538     | 3.190152033     | 2.567445164     | 4.340855589    | 4.901304381     |
| 3.178645286     | 2.909167077     | 3.607652876     | 4.545320812    | 5.041989771     |
| 4.529893361     | 4.007998502     | 1.876990383     | 3.399155523    | 4.864436425     |
| 0               | 4.289179165     | 4.137663953     | 3.427434128    | 1.559439383     |
| 0.058003677     | 3.873864397     | 2.586773708     | 4.688615213    | 0.061456411     |
| 0.080087203     | 3.846741454     | 2.34453258      | 5.100787922    | 1.267725294     |
| 3.355272422     | 2.764824599     | 3.996991759     | 5.483122571    | 4.589223631     |
| 1.278326815     | 3.344602002     | 1.787544375     | 4.075916779    | 3.102170888     |
| 6.74100175      | 3.321477806     | 4.584501217     | 5.523087154    | 8.550264994     |
| 0               | 4.977921319     | 2.252043655     | 3.198845967    | 1.635010862     |
| 0.759283799     | 4.35529649      | 3.611009759     | 4.405590802    | 1.976212837     |
| 0.090817999     | 4.611961108     | 3.593969471     | 4.248588259    | 2.727515497     |
| 0.259378011     | 3.61218629      | 3.317351458     | 3.618223826    | 2.51325949      |
| 0.119403099     | 3.114631614     | 2.496033646     | 3.54607833     | 0.127505311     |
| 2.313741087     | 4.696509999     | 3.51457257      | 3.947317956    | 3.032020925     |
| 7.623831265     | 2.675412103     | 3.834968602     | 3.968847207    | 9.02705048      |
| 0.020282456     | 2.684589488     | 4.630389303     | 2.68477539     | 2.684846868     |
| 0.094192827     | 3.613359318     | 1.958629976     | 3.615397332    | 0.100260663     |
| 0.061878245     | 4.216561468     | 2.60333469      | 4.400227867    | 0.065593898     |
| 0.118984401     | 4.365064327     | 3.107744181     | 2.04987394     | 2.498585863     |
| 1.81340551      | 4.088031514     | 4.278243727     | 3.272485928    | 3.07699956      |
| 3.361253852     | 4.94143588      | 3.987284259     | 3.223237057    | 4.067489321     |
| 0               | 3.689612756     | 1.899074363     | 3.788289683    | 0               |
| 2.958414569     | 5.789258995     | 4.588005089     | 4.276910851    | 4.508738359     |
| 0.179821528     | 2.717379759     | 2.711237898     | 4.60788572     | 0.193522075     |
| 0.106954519     | 3.492891202     | 2.787229932     | 4.209745873    | 0.114030208     |
| 2.794527663     | 4.637029158     | 4.175522731     | 2.960293672    | 0.864895435     |
| 1.595674084     | 4.183501632     | 3.598168193     | 4.714223457    | 3.820914358     |
| 3.133514525     | 4.055441046     | 3.237798322     | 5.181411663    | 5.836735652     |
| 0.050654709     | 3.573838167     | 1.793163189     | 3.574890131    | 0.053619939     |
| 1.669034027     | 4.011922535     | 4.748949118     | 4.630572138    | 1.668736013     |
| 1.04695274      | 3.391616668     | 2.874407808     | 4.880235799    | 5.431412389     |
| 0               | 3.872215784     | 2.460572055     | 3.71212007     | 0               |

|             |             |             |             |             |
|-------------|-------------|-------------|-------------|-------------|
| 0           | 2.505867729 | 2.347471358 | 3.544158129 | 1.433116496 |
| 0           | 3.692125504 | 3.69417973  | 5.77736647  | 0           |
| 0.703162196 | 4.199844146 | 3.218147901 | 3.673978618 | 1.891366486 |
| 0           | 5.180559144 | 4.295087366 | 4.131147782 | 0.671720511 |
| 2.476795486 | 3.164918906 | 2.743789542 | 3.978973546 | 3.629554482 |
| 0           | 4.430409413 | 2.748588706 | 3.819992402 | 3.321880723 |
| 0           | 3.379783696 | 3.181506871 | 3.984654403 | 2.31590767  |
| 0.008568297 | 2.363423245 | 0.008573395 | 4.046218988 | 3.630710385 |
| 5.004136205 | 5.046610758 | 2.54807663  | 2.961550748 | 5.935585595 |
| 1.211348753 | 3.47214513  | 3.468934129 | 4.118464959 | 2.877103019 |
| 0.057542741 | 1.820521282 | 2.584794981 | 3.280332404 | 0.060964468 |
| 0.985460402 | 3.300080622 | 1.980796015 | 3.148193074 | 3.678064824 |
| 0           | 3.780784297 | 3.781063914 | 5.142518019 | 3.673760653 |
| 0.575020172 | 3.267990414 | 3.785417384 | 4.373177663 | 3.264767579 |
| 0           | 2.89603817  | 3.799447541 | 3.592244111 | 1.907245913 |
| 0.053062867 | 4.17526289  | 4.791059673 | 3.725257935 | 0.056186236 |
| 0.187208175 | 4.274285841 | 2.279119307 | 3.371836782 | 2.283349872 |
| 2.594338562 | 3.595006969 | 2.594340121 | 2.81698933  | 3.917136248 |
| 0.33032955  | 4.269859119 | 3.810288683 | 1.995359795 | 0.362569766 |
| 8.883623638 | 5.474570302 | 4.294958082 | 4.047574182 | 9.012266278 |
| 0.294990541 | 3.72466802  | 2.607584579 | 5.200816802 | 0.322272588 |
| 0.013787652 | 4.161119247 | 2.387995483 | 3.241330621 | 1.643265653 |
| 0           | 3.425225162 | 3.427550227 | 4.669013073 | 0           |
| 0.085751384 | 2.977772487 | 2.702658149 | 4.420950995 | 0.091177196 |
| 5.792389429 | 5.132109733 | 3.349194044 | 3.587703357 | 5.341862724 |
| 0           | 4.01497752  | 2.591473337 | 3.470705896 | 2.116205172 |
| 0.044582993 | 3.926940754 | 3.21759615  | 3.392444994 | 3.929161383 |
| 4.615477645 | 5.397276948 | 4.61546833  | 4.556071219 | 6.310294703 |
| 0           | 4.111142278 | 3.256361827 | 4.036592546 | 1.823171276 |
| 0.064889464 | 3.312460711 | 1.220829343 | 4.232295227 | 0.068812265 |
| 0.213984178 | 3.46147217  | 3.682393068 | 3.185383577 | 0.231309491 |
| 1.458459364 | 4.097005281 | 3.792315661 | 4.346557993 | 2.578203949 |
| 0.677977396 | 3.057234487 | 3.173378008 | 4.256684159 | 3.702866221 |
| 0.741784529 | 2.599042627 | 4.572422997 | 4.565508147 | 2.412770401 |
| 4.462369342 | 6.120338159 | 4.717159538 | 3.857337722 | 7.057410822 |
| 5.613167148 | 3.318639991 | 4.239185736 | 3.147728105 | 8.586010143 |
| 0.966964554 | 3.120505844 | 0.966966065 | 3.756310374 | 2.276015679 |
| 3.466765801 | 2.814480457 | 3.007169843 | 4.007580964 | 5.293205143 |
| 2.28160489  | 6.235448245 | 4.318152303 | 4.719354715 | 5.918909986 |
| 0           | 4.813274718 | 3.281466101 | 3.816100651 | 0.885386338 |
| 0           | 3.889858742 | 2.476686195 | 3.110979558 | 0           |
| 0           | 3.75436781  | 2.949405849 | 5.371472181 | 0           |
| 1.22384486  | 1.852585569 | 3.117300267 | 3.784357829 | 1.221645669 |
| 0.341238541 | 4.63669415  | 2.737566075 | 3.588971776 | 2.021705192 |
| 0           | 3.357429217 | 2.116881205 | 3.576991282 | 0           |
| 6.648472408 | 2.20432304  | 3.043968511 | 4.509843057 | 7.63079749  |
| 4.239211057 | 2.600710254 | 4.102197783 | 3.94768673  | 5.019976222 |
| 5.044113786 | 4.249547448 | 2.429221248 | 3.370815925 | 6.056065828 |
| 2.438522896 | 3.124251901 | 2.704593399 | 5.039140214 | 5.560218148 |
| 1.015878013 | 4.024308971 | 2.83016231  | 4.931741163 | 2.830396803 |
| 3.837279077 | 3.838892961 | 2.120760265 | 4.228133504 | 5.143885993 |
| 0           | 2.027896673 | 3.480306361 | 4.906068535 | 0           |
| 2.731832613 | 2.982488665 | 3.776293633 | 4.887554986 | 3.383145893 |
| 1.998017883 | 3.813930719 | 2.779614761 | 1.999401066 | 1.346643    |
| 0           | 4.861335204 | 0.75491515  | 4.310169211 | 1.733908479 |
| 0           | 3.563590438 | 2.989906031 | 4.690692845 | 2.837865609 |
| 1.834910957 | 3.442487815 | 4.389489771 | 4.513213568 | 5.062601734 |
| 0           | 4.944342088 | 4.030487529 | 3.859087408 | 0           |

|             |             |             |             |             |
|-------------|-------------|-------------|-------------|-------------|
| 3.084606818 | 3.748860255 | 3.084673752 | 4.29578176  | 3.995272304 |
| 5.518101353 | 3.898202989 | 2.528177161 | 4.391438478 | 6.498613081 |
| 5.104513121 | 3.976227147 | 2.46207075  | 3.080321193 | 7.74403342  |
| 0           | 3.485354701 | 0.897011473 | 1.233984645 | 0.471454219 |
| 2.321018645 | 4.064613321 | 6.010473482 | 5.835358896 | 3.529806702 |
| 0.034446502 | 3.635112756 | 2.154864845 | 3.343899005 | 3.636548823 |
| 0.022913044 | 1.681509751 | 1.079900651 | 2.431275466 | 0.024169255 |
| 0           | 3.82669406  | 2.250737752 | 3.643691949 | 1.004864056 |
| 0.416398591 | 0.437995522 | 3.412115835 | 5.009756446 | 2.967159832 |
| 0.099058695 | 3.26236542  | 3.028759789 | 5.615864908 | 3.265521594 |
| 2.112440893 | 4.655011565 | 4.128508511 | 3.713984133 | 3.830589648 |
| 0.091847249 | 3.232290756 | 2.999444438 | 4.536180089 | 0.097734725 |
| 1.075735594 | 3.921218777 | 3.279846267 | 3.572341626 | 0.022888544 |
| 0.222327682 | 3.489844261 | 3.199033346 | 3.213677493 | 1.696058681 |
| 3.893719621 | 3.89473691  | 4.174426472 | 4.336748954 | 5.178087883 |
| 2.765198323 | 4.539398429 | 2.543574528 | 4.042147271 | 5.76060865  |
| 0.078470027 | 4.848532201 | 2.943973689 | 2.948060438 | 0.083357743 |
| 0           | 3.953534578 | 3.835361783 | 4.489037301 | 0.637612702 |
| 3.558613671 | 4.060418303 | 3.5586069   | 4.727350775 | 5.142054106 |
| 5.25006599  | 6.067275039 | 4.136509527 | 4.448169537 | 8.457162154 |
| 0.140372522 | 2.577120601 | 2.914307345 | 4.229345739 | 0.150301421 |
| 6.772796511 | 3.516832612 | 4.769266072 | 4.632796051 | 6.642821206 |
| 0           | 2.676434187 | 3.195143756 | 4.557231918 | 4.225265797 |
| 2.135013976 | 3.179100529 | 3.08721056  | 4.374671835 | 2.616140039 |
| 6.420143357 | 2.995028016 | 2.988351069 | 4.636586353 | 9.937526392 |
| 0           | 3.00183123  | 3.003024143 | 4.407454    | 0           |
| 1.362957251 | 4.519612105 | 3.06962248  | 2.014906021 | 3.97745305  |
| 1.247142809 | 4.058862513 | 2.920654738 | 4.82593988  | 2.317577018 |
| 0.019253421 | 3.685547233 | 2.413613037 | 4.74760198  | 1.066534831 |
| 1.038858829 | 4.519201442 | 3.64278095  | 3.379895496 | 0.011652859 |
| 5.885167243 | 3.906277408 | 4.797777499 | 4.506147542 | 4.926926497 |
| 0           | 2.87931292  | 4.458446784 | 4.042362925 | 1.48658807  |
| 0           | 3.405652987 | 1.541781863 | 4.89808666  | 0           |
| 0.028763183 | 2.458165951 | 2.948731129 | 4.796893968 | 0.030362587 |
| 0           | 2.968681148 | 3.290292605 | 2.968604605 | 0           |
| 1.370850113 | 3.686875903 | 3.309071767 | 4.929791849 | 5.546242006 |
| 3.901426629 | 2.739268163 | 3.901574923 | 3.243078687 | 7.36700044  |
| 0.011124744 | 2.863633783 | 1.039070196 | 4.382194963 | 0.011717195 |
| 3.638651301 | 3.698272047 | 3.340405153 | 5.195481003 | 5.191078578 |
| 0.629963003 | 3.616349818 | 3.953562139 | 4.399166621 | 1.122298825 |
| 3.865635675 | 3.625161071 | 3.331896517 | 4.257311813 | 5.600702992 |
| 1.561690124 | 3.621062401 | 2.721110768 | 3.556087069 | 3.194471742 |
| 1.266134813 | 3.701591648 | 3.542809529 | 4.478119836 | 3.179149381 |
| 0.904179465 | 3.137437029 | 1.743348615 | 4.373276551 | 2.961708171 |
| 0.086307946 | 4.001272522 | 2.976650156 | 4.673495849 | 1.287598832 |
| 1.166174807 | 4.052744087 | 3.039688172 | 4.894841336 | 2.215253034 |
| 2.608972464 | 3.8332689   | 3.194928782 | 3.195218648 | 6.197027167 |
| 0           | 3.844841961 | 3.308665838 | 4.596429019 | 0.902496375 |
| 0           | 3.454682198 | 2.091845136 | 4.393739464 | 1.550251666 |
| 2.613637457 | 3.400699498 | 3.40394733  | 3.83382492  | 4.279968079 |
| 1.201671278 | 5.509296389 | 4.223248514 | 4.011012989 | 2.816345181 |
| 1.1838667   | 3.261738519 | 3.063651027 | 4.444430506 | 0.056849009 |
| 0           | 2.920756199 | 3.09043687  | 3.377841712 | 2.508292776 |
| 0.978430797 | 2.775947193 | 3.667786156 | 5.095144152 | 1.971477003 |
| 0           | 4.002486301 | 3.161021245 | 3.420202124 | 1.455787844 |
| 1.88155421  | 2.968725287 | 3.818841563 | 4.342372134 | 4.00942005  |
| 1.744390682 | 5.008172143 | 2.500885054 | 3.191068635 | 2.996275667 |
| 0           | 3.591130231 | 3.593941906 | 3.14879991  | 0.805868914 |

| hsa-miR-3662 | hsa-miR-1269b | hsa-let-7c-5p | hsa-miR-103a-2-5p | hsa-miR-122b-5p |
|--------------|---------------|---------------|-------------------|-----------------|
| 3.916017902  | 1.987685023   | 12.44335774   | 4.480958865       | 3.051442496     |
| 2.614695224  | 0.073161851   | 13.32903229   | 3.780735558       | 5.292732271     |
| 0.029475097  | 1.71740693    | 12.51077273   | 4.070308138       | 2.741376847     |
| 3.542273911  | 10.89936186   | 14.23910254   | 2.666577122       | 6.818885465     |
| 0.100876336  | 7.988464575   | 13.73747009   | 3.830011719       | 0.115390001     |
| 0.042807522  | 5.05566596    | 16.22920295   | 2.537551368       | 1.161486266     |
| 2.92492449   | 0.167316541   | 13.85794997   | 2.155514963       | 2.162146752     |
| 0.018391355  | 0.021714775   | 13.02523274   | 3.423579691       | 2.092020828     |
| 0.927222088  | 4.740188452   | 12.87161374   | 3.349653414       | 4.344299464     |
| 3.531363232  | 1.148023698   | 11.13982485   | 3.67738283        | 3.808809791     |
| 4.25459486   | 0.594467309   | 14.81026544   | 3.29419052        | 0.584533067     |
| 1.651994805  | 0.237443911   | 13.14165194   | 2.351258602       | 2.363011003     |
| 0.092817787  | 11.66737645   | 14.17572652   | 3.465707849       | 3.47645356      |
| 2.781818304  | 0             | 10.61393355   | 3.557711299       | 5.256682449     |
| 5.687582466  | 1.561585241   | 10.98171919   | 4.674956657       | 3.573272076     |
| 0.036198713  | 0.043062551   | 11.45184449   | 3.192993485       | 1.750026218     |
| 2.125132369  | 5.827996914   | 10.44632633   | 2.731618059       | 0               |
| 0            | 5.948910711   | 15.09656419   | 1.318491194       | 2.305931619     |
| 1.252027683  | 8.306308449   | 14.33035301   | 1.887127714       | 1.889280966     |
| 0.202436691  | 7.241058776   | 13.72376144   | 1.71740069        | 2.886003811     |
| 2.18764078   | 1.521406727   | 13.76382469   | 2.204413465       | 4.053340978     |
| 3.297835423  | 0.309017522   | 12.62245692   | 2.532118703       | 3.887383356     |
| 0.024189332  | 1.089436168   | 14.09828942   | 3.301816595       | 3.13311808      |
| 0.124078522  | 10.11684011   | 14.32943748   | 3.17633468        | 3.189299133     |
| 3.150262234  | 2.907028451   | 12.63131591   | 2.897377974       | 2.11505474      |
| 1.204339807  | 1.210338988   | 14.40476952   | 3.408988631       | 3.87899077      |
| 3.291776373  | 7.666074754   | 12.65638263   | 3.428171566       | 6.214703776     |
| 2.577443977  | 9.615374906   | 13.8367628    | 1.198030427       | 2.588255619     |
| 0.072384538  | 2.679680431   | 13.47544587   | 2.946977581       | 3.3788513       |
| 2.757052663  | 1.737355679   | 13.12060532   | 2.987190475       | 2.167899403     |
| 0.938745674  | 8.994985294   | 12.22792703   | 2.828444361       | 1.98702629      |
| 0.999701032  | 1.584604299   | 13.14878088   | 3.32148642        | 6.321456264     |
| 0            | 0.553511022   | 11.4935248    | 2.255362032       | 0               |
| 1.288074111  | 1.292099678   | 13.09298671   | 3.081660304       | 1.28584733      |
| 3.400604286  | 1.295991758   | 13.33597668   | 3.881959257       | 1.304340612     |
| 2.462262439  | 0.293118      | 11.39663078   | 2.95545582        | 3.329010662     |
| 1.388013345  | 0.131348477   | 13.62926031   | 2.046644921       | 3.113940541     |
| 1.753723378  | 0.820322104   | 10.95243158   | 2.315227919       | 2.88406393      |
| 1.892392754  | 10.5635328    | 14.63924267   | 2.669748138       | 2.675109628     |
| 1.070344067  | 11.18835346   | 11.70983136   | 2.417723488       | 3.690626538     |
| 4.12161366   | 0.103124321   | 13.44956469   | 4.24742127        | 4.360296511     |
| 1.208656613  | 3.299491284   | 13.64067855   | 2.268935656       | 2.875081153     |
| 3.508055475  | 1.382293505   | 14.29692707   | 2.490138389       | 2.497325198     |
| 3.962708873  | 6.178161668   | 12.83541258   | 4.444909509       | 3.443565763     |
| 1.915616507  | 0             | 10.81905554   | 3.07397511        | 1.91365958      |
| 0            | 0.926472454   | 13.02095545   | 0.92415419        | 2.475799617     |
| 4.094150587  | 0.168775038   | 11.20427803   | 2.951216587       | 3.472345982     |
| 3.719778173  | 5.41081448    | 12.83525767   | 3.751970096       | 3.340600435     |
| 1.350290493  | 0.117378044   | 13.94035125   | 3.283776765       | 2.006350624     |
| 3.119957821  | 12.14838964   | 11.89801538   | 0.863028416       | 3.783251175     |
| 2.597016468  | 4.183649118   | 12.9378561    | 3.598019491       | 5.223202716     |
| 0            | 0             | 12.51886786   | 4.279412701       | 2.061908391     |
| 0.046046846  | 3.841546758   | 13.3329794    | 2.553119539       | 5.546625412     |
| 1.069085966  | 1.667453372   | 13.20869589   | 3.26995997        | 0.020362336     |
| 1.046651872  | 11.55138547   | 15.12676755   | 3.390213446       | 3.238990855     |
| 1.999665689  | 0.77717416    | 12.19664873   | 0.770118573       | 3.332006997     |

|             |             |             |             |             |
|-------------|-------------|-------------|-------------|-------------|
| 2.362105514 | 6.743888497 | 13.75945262 | 2.169124885 | 1.7182721   |
| 0.864501703 | 9.713893701 | 13.48631903 | 0.864035748 | 3.112694404 |
| 2.362722111 | 1.221837959 | 11.52658195 | 1.592081236 | 2.13845184  |
| 3.985741981 | 1.547248441 | 11.61792887 | 1.167297873 | 4.385507737 |
| 1.113558922 | 11.56767786 | 14.90048536 | 2.967324897 | 2.970000099 |
| 0.834002248 | 1.778966911 | 13.57651684 | 1.379915269 | 2.341397462 |
| 2.116196487 | 0           | 12.94379984 | 1.86066852  | 3.471634827 |
| 1.029959596 | 12.12188359 | 14.70655932 | 2.039373797 | 5.570413291 |
| 4.354292627 | 2.286280051 | 13.28933834 | 0.974030684 | 0           |
| 0.056236593 | 0.067472362 | 13.50024421 | 0.060375022 | 5.121452927 |
| 0.052237719 | 9.688580535 | 13.66228289 | 3.445564304 | 1.196317405 |
| 0           | 0           | 14.26940328 | 2.978907414 | 1.980753275 |
| 0.982757021 | 10.78224284 | 13.56164477 | 3.144542467 | 3.78082289  |
| 0.573819427 | 1.412687627 | 13.86949703 | 2.317246377 | 2.867650936 |
| 4.288853171 | 2.225529277 | 11.58183978 | 0.930199582 | 1.499651112 |
| 1.797826353 | 0.057648434 | 12.35753931 | 2.563476832 | 3.584681445 |
| 3.317210129 | 3.370883169 | 14.30820706 | 3.347744516 | 3.088472586 |
| 0.00172448  | 7.04416336  | 11.17381887 | 2.008698356 | 1.006619105 |
| 0.284853887 | 0.378574617 | 14.1894322  | 2.69275125  | 0.343307245 |
| 3.213541789 | 1.030109779 | 11.52746668 | 4.133743529 | 3.74729442  |
| 2.558062962 | 0.335707948 | 13.74985093 | 3.060001043 | 3.087473536 |
| 2.873860102 | 10.30186275 | 14.90593898 | 3.23975034  | 4.395817119 |
| 3.982516614 | 6.082205358 | 11.83095353 | 2.905996766 | 3.051933124 |
| 0.077418665 | 1.9221593   | 14.73811423 | 2.69911486  | 3.99807728  |
| 2.704649269 | 9.990832675 | 11.40608193 | 2.89331997  | 6.033652004 |
| 0.854767044 | 1.409452373 | 12.84469596 | 1.80489193  | 1.803989557 |
| 1.765279842 | 8.638130408 | 14.82967217 | 1.153437586 | 1.769413952 |
| 1.562898676 | 11.2529959  | 12.55319794 | 2.296670884 | 3.6723585   |
| 0.86839085  | 0.871985005 | 11.63784106 | 2.613603229 | 2.800982419 |
| 0.058822531 | 5.336413234 | 13.29771291 | 1.220640191 | 1.849021409 |
| 2.333398745 | 3.702860463 | 12.18158388 | 0.206638691 | 5.625107991 |
| 4.294524799 | 2.917361986 | 14.80662735 | 4.077845416 | 3.425968342 |
| 0           | 9.536132949 | 13.25113156 | 3.177672839 | 1.554730924 |
| 1.265759209 | 4.51687174  | 13.03509771 | 0.741320946 | 3.046520553 |
| 3.322680254 | 11.57164638 | 12.76529612 | 4.57232512  | 6.019410238 |
| 1.705539914 | 1.099013204 | 14.58052379 | 2.950236273 | 1.708039321 |
| 0           | 0           | 14.21002647 | 1.54476877  | 0.967055185 |
| 0.001277463 | 0.001497519 | 12.92593711 | 2.591860466 | 4.467039355 |
| 0.058493489 | 2.614322263 | 11.84717106 | 2.612052556 | 4.127832924 |
| 3.634468507 | 11.03680955 | 13.1926201  | 3.820699726 | 3.625558758 |
| 2.269044798 | 0.787054042 | 13.56694885 | 1.312911298 | 2.47538644  |
| 1.95541197  | 11.17351029 | 15.01698993 | 3.40816668  | 3.64772012  |
| 1.221336351 | 3.31722234  | 12.72701505 | 2.887098155 | 1.223503826 |
| 2.676298554 | 4.670048328 | 13.35857183 | 3.538566057 | 4.096652666 |
| 3.867899443 | 2.374721588 | 14.00933106 | 1.805183135 | 2.590811171 |
| 2.207675107 | 3.043201602 | 12.9851531  | 2.205368493 | 3.194075327 |
| 0.861530257 | 2.128094463 | 12.22049282 | 3.247445909 | 1.414170593 |
| 3.277789137 | 1.16787584  | 12.39890525 | 3.38811888  | 0.830347801 |
| 0.022511009 | 2.929639543 | 12.65344444 | 3.292916297 | 2.112220074 |
| 1.603922958 | 0.004847839 | 12.66309072 | 2.020784412 | 4.272336669 |
| 1.694665605 | 7.999352254 | 12.59100081 | 2.44686325  | 3.946044195 |
| 0           | 0           | 12.66335232 | 2.854964122 | 1.330298404 |
| 1.499705663 | 1.137428462 | 12.24285655 | 2.589183446 | 2.421345412 |
| 1.344350945 | 2.439762604 | 13.96814014 | 4.067284285 | 3.056526317 |
| 0           | 1.083557576 | 11.21887568 | 1.903248395 | 0.757172939 |
| 1.323404097 | 0           | 13.7264013  | 2.843320012 | 2.270288007 |
| 2.653093499 | 0.676337319 | 12.21051549 | 2.789152623 | 2.63649267  |
| 0           | 12.53299836 | 10.57979619 | 3.036686237 | 0.910788265 |

|             |             |             |             |             |
|-------------|-------------|-------------|-------------|-------------|
| 0.053005147 | 2.254371827 | 9.105684246 | 2.586236361 | 5.385308754 |
| 1.086942566 | 0.615464629 | 12.36301577 | 4.180920354 | 0.605941856 |
| 2.780745225 | 0.12119632  | 12.36653973 | 3.297215246 | 5.050670619 |
| 1.744768243 | 0           | 11.29735361 | 2.409168203 | 0           |
| 0.067165878 | 0.080962856 | 11.75515477 | 3.149913164 | 2.657316603 |
| 3.163143215 | 2.153368083 | 12.38204455 | 3.631130635 | 1.728694344 |
| 1.079323494 | 0.024753972 | 14.82806511 | 1.079910047 | 5.122344221 |
| 2.571997986 | 1.361116001 | 10.98102376 | 2.25405658  | 6.460704851 |
| 2.150685365 | 0.48559671  | 11.05056973 | 2.916049271 | 2.953570726 |
| 1.965788265 | 10.38369034 | 13.70826586 | 1.33026211  | 4.055337949 |
| 3.44225652  | 1.083722608 | 14.28452799 | 1.688724874 | 5.686965272 |
| 3.208749209 | 4.917026865 | 14.39273562 | 2.723450365 | 3.42915716  |
| 2.687051884 | 1.0734961   | 11.37933442 | 1.075744161 | 3.813743025 |
| 0.195569608 | 3.935875893 | 14.3223683  | 2.841548134 | 0.229748639 |
| 1.653762171 | 11.08246934 | 13.25367047 | 2.889141604 | 3.671562174 |
| 0           | 10.53818944 | 13.68482967 | 1.961658451 | 1.961405223 |
| 2.659633602 | 1.257413544 | 14.44125803 | 3.167780518 | 4.082865017 |
| 1.789740503 | 10.37927013 | 13.68693511 | 3.297841197 | 2.976111455 |
| 1.977404617 | 6.36394032  | 12.34830862 | 4.728243213 | 2.974209495 |
| 2.37785192  | 1.944775671 | 13.30985842 | 4.33822996  | 4.350451675 |
| 2.550278964 | 0.155031224 | 14.22719317 | 3.938447034 | 2.919105963 |
| 1.004357324 | 1.364757204 | 13.79434381 | 2.258537308 | 5.057692165 |
| 2.128403061 | 9.431590572 | 11.69523379 | 2.963604083 | 0.691262227 |
| 1.048609981 | 1.413768808 | 13.24349965 | 3.365527842 | 4.458105656 |
| 3.230122026 | 13.00029157 | 14.1626059  | 4.506015802 | 3.70278227  |
| 0           | 1.452006824 | 13.49366713 | 2.836172279 | 0.889767475 |
| 3.047847922 | 3.305333997 | 13.54229566 | 2.010878702 | 2.460468527 |
| 1.244205869 | 1.874572114 | 11.13000568 | 2.64705917  | 3.15105827  |
| 2.675824771 | 5.275762633 | 14.3010304  | 1.666038858 | 3.097632942 |
| 1.038617762 | 3.05666609  | 13.12971425 | 0.010803951 | 4.644734899 |
| 0           | 6.150622398 | 11.05642712 | 2.550026041 | 2.148326995 |
| 0           | 11.86129025 | 14.12865516 | 2.209828478 | 2.468488714 |
| 0.964753848 | 3.851807943 | 13.59957614 | 2.756412212 | 2.272724323 |
| 1.703124052 | 0.031107871 | 14.18278465 | 1.705027819 | 5.239933492 |
| 0           | 9.745020032 | 14.15353625 | 1.972089257 | 3.427350175 |
| 2.009966633 | 9.938394505 | 13.72581988 | 4.601608241 | 3.685987695 |
| 2.385745551 | 2.736808357 | 14.60716183 | 2.396285706 | 4.033923045 |
| 0.010191985 | 9.155780754 | 14.57574448 | 2.639427699 | 3.759338021 |
| 0           | 0           | 11.25765516 | 3.26106546  | 3.989336582 |
| 1.489795856 | 6.718459236 | 12.84400223 | 3.194983995 | 2.409657839 |
| 2.142077182 | 0.035079766 | 12.65269765 | 1.112383954 | 4.256101617 |
| 2.622513158 | 1.572967957 | 10.68697718 | 2.606773156 | 4.370317097 |
| 1.893564333 | 0.086036691 | 12.56648448 | 4.547090354 | 1.265794277 |
| 0.467994694 | 2.278684843 | 13.15308529 | 2.88000413  | 1.9412332   |
| 3.554940675 | 1.281955814 | 10.44576926 | 3.569687507 | 4.225476412 |
| 1.164583828 | 1.16130994  | 13.47525498 | 3.404236307 | 1.784458809 |
| 1.016928904 | 7.741791928 | 12.41592844 | 3.346851888 | 2.34540196  |
| 0.901583176 | 1.869905441 | 15.13801741 | 2.854135085 | 3.307561791 |
| 0           | 1.851120781 | 13.20799381 | 2.934448175 | 1.175839791 |
| 1.968462189 | 2.215405932 | 13.22347353 | 1.65838298  | 1.273355542 |
| 1.205930556 | 1.710573913 | 12.75687518 | 2.617885824 | 3.971988301 |
| 0.048772091 | 1.801279113 | 14.12643786 | 3.428288528 | 2.838856275 |
| 1.930696058 | 1.521138118 | 14.80640374 | 1.519948011 | 1.92905407  |
| 0.978532685 | 0.979070649 | 11.89244578 | 3.13829755  | 6.340992597 |
| 2.656443276 | 9.573057452 | 14.42982818 | 3.29905419  | 2.431637137 |
| 2.852374062 | 9.563988249 | 14.39559543 | 2.841416509 | 1.206115428 |
| 1.131490968 | 6.273973969 | 10.2974019  | 1.132605226 | 1.744598686 |
| 2.709609892 | 11.21987568 | 11.59644682 | 2.514330383 | 0           |

| hsa-miR-224-3p | hsa-miR-3614-5p | hsa-miR-20a-5p | hsa-miR-369-5p | hsa-miR-184 |
|----------------|-----------------|----------------|----------------|-------------|
| 1.993781658    | 2.438124307     | 10.86677115    | 4.670423489    | 4.309664237 |
| 4.244995234    | 2.626629378     | 14.10903225    | 0.069848607    | 8.692384586 |
| 5.531463618    | 3.485193071     | 10.10585108    | 3.625185105    | 4.928411768 |
| 4.846467564    | 3.788217534     | 11.98742914    | 1.656026274    | 3.256691415 |
| 4.118456322    | 2.809837757     | 10.84246787    | 4.785513128    | 0.122354225 |
| 5.247721314    | 7.382113576     | 9.146150672    | 1.779165077    | 7.925408997 |
| 4.007377931    | 3.232671364     | 11.33954062    | 1.490734844    | 2.157623707 |
| 4.752877629    | 2.907570182     | 10.0433836     | 4.106714562    | 1.66883781  |
| 5.203757939    | 4.056058131     | 12.39874524    | 3.693588032    | 1.903465188 |
| 3.927785506    | 3.217067597     | 13.90273738    | 1.768133247    | 1.149235309 |
| 1.703241385    | 3.45215744      | 10.48243761    | 0.585825475    | 4.609484621 |
| 0.229624553    | 5.552780921     | 9.369925606    | 3.45838359     | 3.180273703 |
| 5.415434664    | 3.802522677     | 11.83836022    | 2.776811443    | 4.828725667 |
| 4.363537883    | 3.142777704     | 12.81536259    | 3.672406388    | 1.562987611 |
| 4.117284279    | 1.576768703     | 12.50263208    | 3.065846771    | 1.566858447 |
| 1.749325409    | 1.137109523     | 12.76297618    | 0.041228805    | 4.013600122 |
| 5.04046643     | 4.135568487     | 8.657098767    | 3.689738422    | 1.6742351   |
| 3.572276232    | 3.479452175     | 9.096675309    | 6.909080538    | 3.039152328 |
| 5.877236819    | 5.373578689     | 10.24447624    | 4.623853672    | 1.249879811 |
| 3.763135265    | 2.41851847      | 11.80692048    | 1.7222522      | 0.256300843 |
| 7.095628257    | 3.009899679     | 11.72948712    | 3.015849291    | 2.207656982 |
| 5.853329575    | 3.87934447      | 11.43988291    | 2.553148847    | 0.305551533 |
| 6.668085052    | 2.713655704     | 10.03887037    | 2.120484923    | 6.76053704  |
| 4.976611874    | 2.569271869     | 11.51016386    | 2.1200591      | 3.193441357 |
| 3.79697182     | 2.906123114     | 12.16626104    | 3.418553323    | 0.150494932 |
| 2.682137847    | 4.803487439     | 7.910942898    | 4.432760099    | 1.208020429 |
| 2.968781499    | 3.29040684      | 13.06420336    | 0.979062057    | 1.972341616 |
| 4.620053176    | 4.096000006     | 10.05942596    | 4.617471546    | 1.194000777 |
| 2.95566552     | 3.180269585     | 10.61010538    | 3.183390842    | 1.903546412 |
| 5.521501031    | 3.356083868     | 12.53319244    | 1.740244831    | 5.873978559 |
| 5.081037975    | 3.419915845     | 11.16519626    | 6.559770171    | 1.288025299 |
| 2.8069176      | 3.169480463     | 10.98036383    | 2.584534343    | 4.247456848 |
| 7.448600976    | 1.868995945     | 10.50196469    | 2.681236763    | 2.410947183 |
| 5.929326512    | 2.227557008     | 11.30639313    | 3.606539753    | 2.94080595  |
| 6.339641291    | 2.99680705      | 11.30366807    | 1.303685258    | 3.60301801  |
| 5.349588596    | 1.802519368     | 12.29454823    | 0.274144337    | 0.289903802 |
| 2.500101477    | 1.394532326     | 10.22079382    | 6.355634617    | 11.93568034 |
| 4.90161828     | 2.718180626     | 13.220563      | 6.610831352    | 7.657214898 |
| 2.339992111    | 5.911852469     | 10.73658711    | 1.900950872    | 11.33955255 |
| 3.914993611    | 3.425997747     | 11.47721992    | 2.68474229     | 2.092108539 |
| 6.758229463    | 1.959206846     | 11.64227924    | 1.314423918    | 1.309115848 |
| 0.065690752    | 4.895560719     | 10.07353538    | 1.210098892    | 0.066835399 |
| 2.498512368    | 3.867224641     | 11.0301492     | 2.049902219    | 7.288787105 |
| 4.874048838    | 2.246245666     | 12.48128808    | 4.454293622    | 4.09178072  |
| 2.231464243    | 2.712549893     | 11.5102147     | 6.77831164     | 2.712293384 |
| 5.368969067    | 2.21609788      | 11.14572149    | 2.475630056    | 0           |
| 2.16615752     | 2.165384449     | 11.18373783    | 2.62206308     | 6.533977093 |
| 4.50583649     | 2.713926692     | 13.19874929    | 1.576041821    | 1.566794132 |
| 4.095740875    | 1.355688104     | 12.11725985    | 2.452455323    | 0.116413587 |
| 3.590163446    | 2.604305425     | 11.85120424    | 6.404903216    | 1.419003548 |
| 6.080155699    | 6.036071163     | 9.859822899    | 3.335149181    | 2.334048201 |
| 4.721261418    | 2.764644411     | 12.85231453    | 3.232653383    | 7.001852059 |
| 5.821384558    | 3.954052732     | 9.170440634    | 4.064664943    | 6.610004665 |
| 5.632685047    | 3.100532164     | 10.81205151    | 5.151986171    | 2.416790504 |
| 2.386442701    | 3.877899557     | 11.45995335    | 0.013859682    | 3.068660383 |
| 3.710754084    | 3.219617854     | 10.84688395    | 5.342594815    | 5.947386283 |

|             |             |             |             |             |
|-------------|-------------|-------------|-------------|-------------|
| 4.090258494 | 4.458506899 | 10.02627438 | 5.946214426 | 0.602488719 |
| 7.217496435 | 4.106104985 | 11.67427671 | 0           | 0           |
| 4.020669451 | 4.407710128 | 11.5777144  | 1.890470253 | 3.212943005 |
| 2.782309178 | 2.785227638 | 10.51696559 | 6.786519474 | 1.174211019 |
| 4.634934521 | 3.753411095 | 10.47538453 | 2.149310058 | 9.884851518 |
| 4.427581602 | 3.064767665 | 10.4102058  | 4.483582898 | 3.639960094 |
| 1.859819976 | 4.050411745 | 10.76751679 | 2.105081963 | 0.689565548 |
| 5.8551375   | 3.043878951 | 11.18384767 | 2.363458232 | 5.405449462 |
| 0           | 0           | 10.56663786 | 4.281359042 | 1.96589107  |
| 2.877103766 | 4.396392097 | 11.77293213 | 2.272743177 | 6.158120754 |
| 3.991342328 | 4.093866346 | 12.80828817 | 1.195837962 | 0.062106888 |
| 3.784881377 | 4.369871672 | 9.785201704 | 5.999296309 | 5.224624885 |
| 6.181622858 | 2.560312903 | 10.40210866 | 1.563883365 | 1.977249294 |
| 5.768567389 | 3.180364926 | 12.36256326 | 4.154279719 | 1.409479902 |
| 0.931150035 | 4.139112982 | 10.30021895 | 4.13797681  | 0           |
| 0.056267555 | 5.399816608 | 11.08751833 | 0.055117973 | 0.057228221 |
| 3.375233138 | 2.739129234 | 11.23358956 | 4.407171526 | 9.555221806 |
| 4.533978676 | 5.332221026 | 10.02481441 | 3.817512901 | 0.002008921 |
| 2.725004222 | 4.43144874  | 9.162770148 | 2.722503383 | 2.719154793 |
| 5.178183028 | 3.747069667 | 12.45775039 | 2.040856605 | 5.664146252 |
| 2.621019899 | 0.300190052 | 11.37718453 | 2.619617601 | 3.454398187 |
| 5.66118205  | 5.118489234 | 11.97767114 | 1.643478486 | 1.04728161  |
| 2.734731229 | 2.903129787 | 13.10538562 | 2.735001458 | 0.830214437 |
| 5.13019048  | 3.868494362 | 11.68350527 | 1.287496451 | 1.282630801 |
| 0           | 1.903218927 | 11.87711197 | 1.903158794 | 3.885439972 |
| 5.04570295  | 1.804071309 | 11.94270551 | 3.936672182 | 0.857759334 |
| 3.547037874 | 2.797216573 | 8.761263906 | 6.116914373 | 4.626436568 |
| 5.828471594 | 3.557123218 | 12.13258885 | 3.294187995 | 2.296540377 |
| 4.642766258 | 3.119536088 | 12.22344653 | 4.541572446 | 1.425004401 |
| 6.194445877 | 2.283778168 | 12.27475716 | 2.618511994 | 0.070123678 |
| 1.671874679 | 1.675472171 | 10.76676502 | 4.374920212 | 1.664759955 |
| 6.025681435 | 3.795810691 | 12.3471838  | 2.125040621 | 1.450127177 |
| 6.533325209 | 3.551177659 | 9.968375215 | 3.056301369 | 0           |
| 1.950052846 | 5.521637337 | 9.449250915 | 1.264152242 | 7.238863856 |
| 4.98889818  | 1.294207782 | 12.40321886 | 0           | 6.592522435 |
| 3.472878406 | 3.851477713 | 10.75312501 | 1.707953454 | 6.981397681 |
| 3.534171964 | 4.036550874 | 10.26881444 | 4.270199241 | 0           |
| 3.814924628 | 2.591930525 | 10.36665312 | 4.255548487 | 5.217295832 |
| 6.334914078 | 5.023627662 | 12.45038159 | 1.218762952 | 1.844648828 |
| 7.28409091  | 3.280844854 | 12.58596838 | 0           | 3.143138072 |
| 1.314793713 | 3.113241768 | 9.866291833 | 5.218175563 | 3.452242857 |
| 6.229867966 | 3.854070368 | 11.35283976 | 2.535645434 | 0           |
| 4.980958081 | 2.287552484 | 11.70951538 | 2.622445814 | 0.071128626 |
| 5.690973834 | 3.568848832 | 11.45400293 | 4.488477171 | 0.387020672 |
| 6.218094279 | 4.160464534 | 11.82729473 | 1.406285895 | 0           |
| 4.993411718 | 1.482105513 | 11.14061024 | 3.193648507 | 0           |
| 4.580759119 | 2.126054976 | 11.97083008 | 3.481869774 | 0.864363609 |
| 3.704553314 | 2.007823672 | 12.05893171 | 4.378649682 | 5.134180502 |
| 4.887897099 | 2.929458894 | 10.58324734 | 2.930237346 | 4.131124577 |
| 5.195043704 | 2.02091587  | 13.17251319 | 2.607522975 | 7.11305098  |
| 4.390018752 | 1.092651305 | 12.00912763 | 3.723333544 | 4.390453816 |
| 4.303254686 | 3.135993869 | 10.9883207  | 3.912435647 | 2.497698384 |
| 5.526486832 | 3.096668033 | 11.4778494  | 3.958904207 | 2.422887362 |
| 6.352988528 | 3.65532108  | 10.75303079 | 3.486565146 | 5.731654136 |
| 5.778330209 | 1.32265975  | 10.00666419 | 5.961240819 | 7.365988151 |
| 4.400847628 | 4.557992259 | 12.20037587 | 4.348985948 | 1.713556869 |
| 2.47292569  | 3.444985578 | 10.38693894 | 2.07979612  | 1.838434389 |
| 1.475963282 | 1.475267068 | 13.22016801 | 0.911053058 | 5.211415242 |



|             |             |             |             |             |
|-------------|-------------|-------------|-------------|-------------|
| 5.303194931 | 3.281625821 | 12.20876963 | 3.087842313 | 2.86031994  |
| 4.99514441  | 3.643022806 | 11.17326054 | 4.855107549 | 2.922196619 |
| 4.782600435 | 2.802238219 | 11.50893539 | 1.365394266 | 2.46316808  |
| 4.800714524 | 2.262481901 | 9.860520614 | 3.770805423 | 1.24196574  |
| 4.371679132 | 5.412757886 | 11.62840395 | 1.884774086 | 9.526017519 |
| 3.34445697  | 3.495538198 | 11.34927957 | 4.350095063 | 1.116724759 |
| 1.681064637 | 4.290149379 | 9.562454182 | 3.440115716 | 5.826515713 |
| 1.353376494 | 3.01597717  | 11.60976202 | 3.510090315 | 5.675511993 |
| 2.216267946 | 2.211399708 | 11.84286227 | 4.52828767  | 0.478784816 |
| 7.353052637 | 0.10031523  | 10.37483008 | 3.034024049 | 4.949591065 |
| 4.777302982 | 4.129162645 | 12.63379579 | 0.025665281 | 5.134850566 |
| 3.607341766 | 4.765366059 | 10.73125432 | 3.604945954 | 0.099712443 |
| 4.364385925 | 1.676499077 | 10.90761057 | 3.281152216 | 1.07407913  |
| 4.543224495 | 1.699169732 | 11.64250819 | 4.532850497 | 2.861945423 |
| 2.075860176 | 3.254589657 | 12.996101   | 0.017130563 | 8.10381711  |
| 2.281513839 | 2.543474871 | 11.17141976 | 1.549524712 | 1.961735733 |
| 2.339911356 | 1.900592787 | 10.66277714 | 1.900875227 | 1.259610667 |
| 4.565125216 | 3.381908358 | 11.43156244 | 3.693050367 | 2.974704296 |
| 5.463876494 | 1.563651454 | 11.0948503  | 3.55826903  | 2.297793135 |
| 7.914473371 | 1.950803546 | 10.20304538 | 1.30718311  | 7.512638776 |
| 3.200331351 | 3.95163385  | 11.39176833 | 4.650063238 | 5.424792492 |
| 4.839375829 | 4.230294002 | 12.84773589 | 4.26587817  | 5.329507248 |
| 4.786983593 | 3.08083037  | 13.18512974 | 2.117404016 | 2.120289    |
| 2.313179259 | 2.618917697 | 14.12115638 | 4.734316716 | 4.369495282 |
| 3.88776531  | 2.991205898 | 10.89610215 | 1.519392916 | 12.69659638 |
| 3.632859097 | 4.073614959 | 10.3627912  | 4.21567203  | 2.167309312 |
| 0.116730854 | 2.459245183 | 10.53774671 | 0.114043544 | 0.118988076 |
| 6.584612002 | 2.6509674   | 12.82488426 | 2.317757421 | 6.105440972 |
| 4.42575542  | 4.271450986 | 11.5883046  | 2.903993719 | 1.065814005 |
| 3.517991417 | 4.146364809 | 10.57845805 | 4.760701616 | 4.584352157 |
| 5.428759437 | 2.546314713 | 9.573075597 | 2.544743037 | 2.361921027 |
| 3.574358306 | 2.879769687 | 11.62400346 | 2.879101827 | 4.329951806 |
| 7.377357401 | 2.755856213 | 10.7580159  | 0.964797893 | 1.542363402 |
| 5.403320268 | 3.848478218 | 11.62439678 | 0.029816693 | 1.097782398 |
| 6.760256231 | 2.968811712 | 9.751553632 | 2.776423863 | 7.866339465 |
| 6.432454242 | 3.838114098 | 11.93639369 | 3.844284772 | 2.019723392 |
| 5.110499423 | 4.148071094 | 10.77852505 | 1.959140861 | 1.308636906 |
| 1.632092552 | 3.759053093 | 11.7119209  | 2.863737938 | 8.424696947 |
| 3.487399462 | 2.60068369  | 10.54649013 | 4.271512883 | 3.062257043 |
| 5.43105686  | 2.228252743 | 11.85170825 | 3.281561067 | 0           |
| 6.007922513 | 4.416095981 | 11.00920367 | 1.111865121 | 1.109963353 |
| 3.942044701 | 2.470985396 | 12.56537451 | 4.662382784 | 7.445884969 |
| 2.677750413 | 2.340263052 | 10.41754318 | 4.086767556 | 2.949264176 |
| 6.281722249 | 2.272928385 | 10.78116703 | 4.338939744 | 1.521374468 |
| 0.091918482 | 1.290187291 | 11.90944716 | 2.371560039 | 2.981103983 |
| 5.298741843 | 2.214893913 | 11.93332863 | 3.946008256 | 1.162637367 |
| 5.419304903 | 2.831878542 | 12.10278453 | 3.610755216 | 2.609074    |
| 5.298479916 | 1.867968071 | 11.95481883 | 3.170600694 | 0           |
| 4.643789727 | 3.163866057 | 10.83415871 | 4.439651252 | 4.823271021 |
| 5.158746467 | 3.060794994 | 10.29118516 | 4.863726162 | 1.277938594 |
| 4.508096925 | 4.798200736 | 9.843961867 | 1.895888686 | 0.457456575 |
| 3.856383217 | 1.183773883 | 10.67718275 | 1.805329073 | 10.74897131 |
| 3.8234797   | 3.503641806 | 12.04704787 | 4.559441427 | 3.617665085 |
| 6.772610865 | 1.97144831  | 13.5600405  | 1.558712978 | 1.559035676 |
| 5.733378262 | 3.296916936 | 11.46414919 | 3.159405945 | 0           |
| 4.869760363 | 0.697420472 | 10.57666385 | 1.880985735 | 1.586927718 |
| 3.363533945 | 1.744538228 | 10.66529438 | 3.190947194 | 5.528207262 |
| 4.481430798 | 2.041570199 | 11.010236   | 4.629716152 | 1.735997699 |

| hsa-miR-581 | hsa-miR-3923 | hsa-miR-17-5p | hsa-miR-4664-3p | hsa-miR-34c-3p |
|-------------|--------------|---------------|-----------------|----------------|
| 0.089155229 | 0.112616845  | 11.38463893   | 1.956289099     | 0.101498078    |
| 2.278448902 | 1.223913632  | 14.2398068    | 2.593058786     | 0.065805599    |
| 2.139435822 | 0.034655848  | 10.50003136   | 1.106860011     | 3.158780855    |
| 1.653931993 | 1.057560512  | 12.35189884   | 1.651229855     | 2.076561046    |
| 1.362246847 | 0.122075703  | 10.82493899   | 0.084700196     | 1.371931822    |
| 1.158826943 | 0.050600543  | 9.285067747   | 0.036597832     | 0.046144658    |
| 0.128270912 | 0.165403211  | 11.31908097   | 0.112017229     | 3.453752037    |
| 2.678047787 | 2.091443811  | 10.42327793   | 2.673079067     | 0.019742519    |
| 2.484927436 | 1.90335716   | 12.22703829   | 0.929389898     | 2.701225068    |
| 2.516630736 | 2.796948907  | 14.64718969   | 5.000744823     | 0.043430123    |
| 1.715546137 | 2.149076292  | 10.58979495   | 0.58840692      | 2.768810762    |
| 1.641428786 | 0.234398658  | 10.05178255   | 1.609115005     | 2.81133684     |
| 0.088654239 | 1.337584228  | 11.67168077   | 1.321827048     | 1.343345667    |
| 0           | 0.982093661  | 13.60260833   | 2.783591888     | 3.779847315    |
| 1.555035215 | 1.56787473   | 13.17549247   | 3.227354077     | 3.048843164    |
| 2.169992531 | 0.042675631  | 12.89872855   | 0.031012584     | 1.749366924    |
| 2.756360654 | 1.673607014  | 9.422270177   | 0.567956127     | 6.887829757    |
| 0.357634785 | 1.074199476  | 9.416211625   | 0               | 1.728315335    |
| 1.249458162 | 4.284124966  | 10.34995976   | 1.24059774      | 0.073855697    |
| 3.427552847 | 0.255569251  | 11.95987407   | 2.315066179     | 1.718459905    |
| 1.516671783 | 0.181992549  | 11.92638612   | 2.142807668     | 3.507049761    |
| 2.93002461  | 1.829446109  | 11.09185646   | 2.863584349     | 0.264921982    |
| 2.11510013  | 0.028381201  | 10.40331953   | 1.688295121     | 1.695849804    |
| 2.091454052 | 1.446622649  | 11.38706915   | 0.103450723     | 2.11479504     |
| 2.087277443 | 1.442697039  | 12.10438661   | 2.060426034     | 2.110332584    |
| 4.325503527 | 1.207551876  | 8.536032237   | 0               | 2.126421748    |
| 3.140528298 | 10.30224476  | 13.63073715   | 2.779971957     | 3.668841694    |
| 0.050467808 | 0.062482778  | 10.71797216   | 0.044874239     | 2.854228425    |
| 2.659199546 | 0.086586944  | 10.58650384   | 0.061313207     | 2.342616484    |
| 2.48748257  | 1.738654322  | 12.49194348   | 1.122937731     | 3.77160598     |
| 0           | 0            | 11.68582663   | 2.036626906     | 3.953460271    |
| 2.584557836 | 0            | 11.35706219   | 2.321551043     | 1.584597733    |
| 1.360043314 | 0            | 10.73299671   | 0               | 5.335066645    |
| 1.679675079 | 0            | 11.67007669   | 3.240317878     | 3.782164596    |
| 2.366891146 | 0.098363394  | 11.54300215   | 0.069179175     | 1.304374464    |
| 2.894255466 | 3.625463531  | 11.93483836   | 0.18334197      | 2.495875624    |
| 2.803098638 | 0.129939798  | 10.51403199   | 0.089756541     | 0.116729062    |
| 1.756434873 | 0.818805136  | 13.69976063   | 1.366930191     | 2.887321235    |
| 3.148180451 | 0.084837701  | 10.76769242   | 0.06013568      | 1.264905136    |
| 1.667978376 | 0.021713684  | 11.66630602   | 2.084724852     | 2.092151756    |
| 2.712239498 | 0.102075759  | 12.00991468   | 1.925502213     | 0.092181097    |
| 2.588186115 | 0.066699154  | 10.39079758   | 1.199643618     | 1.836093088    |
| 1.382058918 | 0.129475109  | 11.37485186   | 2.004097438     | 0.116321787    |
| 3.251532996 | 1.187251249  | 12.89252952   | 1.181027723     | 2.244520371    |
| 1.507603763 | 0            | 12.01265372   | 1.920106808     | 1.505817956    |
| 1.494370611 | 1.493376887  | 12.15646052   | 0               | 0              |
| 2.134509961 | 0.166840161  | 11.80449911   | 0.112901047     | 1.494171573    |
| 3.873110318 | 1.56781029   | 12.707622     | 1.528846146     | 2.705460245    |
| 1.986584742 | 6.510778619  | 11.85714057   | 0.080861523     | 2.446326752    |
| 1.821700909 | 2.129672571  | 12.69511144   | 3.617781425     | 1.816656269    |
| 2.011179595 | 1.595550979  | 10.11104984   | 1.594993657     | 1.008822221    |
| 1.157286412 | 0.662982406  | 13.10874914   | 1.167433186     | 2.274924477    |
| 0.044163014 | 0.054500284  | 9.60137155    | 1.164967833     | 1.173754441    |
| 0.017511391 | 1.668146828  | 11.04530972   | 2.083229902     | 2.090516246    |
| 0.011793113 | 0.014315602  | 11.36284385   | 1.638023912     | 0.013146024    |
| 0.771537534 | 0            | 11.0909329    | 2.015958247     | 2.246850111    |

|             |             |             |             |             |
|-------------|-------------|-------------|-------------|-------------|
| 1.732708853 | 7.93976693  | 10.49592178 | 0.599139598 | 2.168409394 |
| 2.396105008 | 0           | 11.12210469 | 0.868158069 | 0.864055092 |
| 1.218670171 | 0           | 11.67542265 | 0.708893646 | 0.702682075 |
| 1.548950875 | 0.674399328 | 11.44905781 | 2.518155979 | 0           |
| 2.735208707 | 0.03543507  | 10.41192978 | 1.109182603 | 1.114503443 |
| 3.215189896 | 3.062915834 | 10.3514983  | 1.389802936 | 0.833543251 |
| 1.192005332 | 0           | 10.89442835 | 1.201730295 | 1.860257436 |
| 0.007558287 | 0.009155355 | 11.07045298 | 1.028924744 | 2.36303029  |
| 1.966883634 | 0.974588798 | 11.15835113 | 0.974993998 | 1.553388069 |
| 1.207050042 | 1.207271168 | 13.25821392 | 2.245303986 | 1.211261455 |
| 2.241157736 | 0.061981538 | 12.81870944 | 0.044527449 | 1.196580811 |
| 2.302714858 | 0           | 10.16110833 | 1.568352831 | 0           |
| 1.564413601 | 0           | 10.54908339 | 0           | 4.558533096 |
| 1.411804609 | 1.408844641 | 12.25158711 | 1.42739197  | 1.402331738 |
| 2.228669071 | 0           | 10.84010728 | 0.932597013 | 2.225199132 |
| 1.178327092 | 0.057113911 | 11.05153068 | 0.04114903  | 1.18175559  |
| 1.575084699 | 0.206061634 | 11.20921544 | 2.201750739 | 1.596072602 |
| 2.008417691 | 2.816979688 | 10.12323397 | 1.006379651 | 3.710334284 |
| 0.267670895 | 0.372652183 | 9.84198498  | 0.226762409 | 0.320105653 |
| 2.626444034 | 1.030392024 | 12.91653193 | 2.847125518 | 0.008665358 |
| 1.849485775 | 0.330744765 | 10.90972762 | 0.205444058 | 2.598389901 |
| 0.0121446   | 0.014744892 | 11.80457987 | 0.010898033 | 3.530281738 |
| 2.341079265 | 0           | 12.87760293 | 1.38078691  | 0.826084934 |
| 2.680697357 | 3.208815633 | 11.64421111 | 0.065474998 | 1.926103621 |
| 1.498183438 | 0           | 12.48944371 | 2.903340883 | 1.903608115 |
| 0           | 1.408064501 | 11.8914269  | 0.858624048 | 2.949883419 |
| 1.150741035 | 1.150463034 | 9.096591938 | 0.034714363 | 1.153481016 |
| 1.976552627 | 4.219001976 | 12.17720181 | 0           | 0.981587603 |
| 2.401687214 | 1.424796407 | 12.54609163 | 0.87196481  | 2.136914255 |
| 1.838663274 | 4.026444969 | 12.20861271 | 1.827189271 | 1.847639831 |
| 1.646492174 | 0.236606406 | 10.94019792 | 2.272849089 | 0.208365372 |
| 1.444111176 | 0.153188747 | 12.15917081 | 2.068553858 | 2.568538244 |
| 2.114678015 | 10.84590132 | 10.36456903 | 0.683742419 | 1.555300364 |
| 2.617912854 | 0.74721286  | 9.980219433 | 0.74734465  | 2.416288104 |
| 2.877839931 | 0.514522045 | 12.33705292 | 1.606601854 | 9.349792984 |
| 2.127198526 | 0.031488291 | 11.00254087 | 2.121193605 | 0.028820576 |
| 0           | 0           | 10.35408746 | 0           | 1.956398692 |
| 1.590776241 | 1.590869    | 10.52665556 | 2.328088798 | 3.914264756 |
| 2.866803339 | 2.281616105 | 12.20604101 | 1.825915949 | 0.063222886 |
| 3.637944573 | 1.444246739 | 12.81087333 | 1.449979259 | 2.637190308 |
| 0.781719988 | 1.704231465 | 10.53621642 | 1.324980203 | 2.478204641 |
| 1.956004314 | 1.543491176 | 11.35866191 | 0.966811591 | 1.954560119 |
| 1.219174722 | 0.070982324 | 11.9651434  | 2.855128011 | 1.851154924 |
| 1.957540339 | 0.3856947   | 11.56009361 | 2.571615081 | 0.330527946 |
| 2.601492849 | 0           | 11.78894601 | 0.858832371 | 0           |
| 3.050738359 | 2.204899566 | 11.51325469 | 1.487880577 | 4.329356681 |
| 2.133472321 | 0.864162906 | 12.35606304 | 1.422884859 | 4.174285521 |
| 2.190867271 | 1.162814696 | 12.48901952 | 2.064691496 | 5.344648388 |
| 1.084515115 | 0.026394404 | 10.80786433 | 1.082024257 | 5.520580215 |
| 1.015677378 | 1.604020319 | 12.84216917 | 2.605166759 | 2.830015101 |
| 2.93121052  | 1.695646513 | 12.25885535 | 1.688915437 | 2.447093697 |
| 1.334557817 | 0.798704917 | 11.03750263 | 1.73791932  | 3.003707335 |
| 2.048134137 | 0           | 12.11160554 | 2.916583745 | 2.867597684 |
| 3.021985268 | 0.114004887 | 11.04817945 | 0.079464194 | 1.996289907 |
| 1.072508903 | 0.374269377 | 10.35359281 | 0           | 2.191779754 |
| 2.283098675 | 1.324694591 | 11.7632239  | 1.72825265  | 2.27251104  |
| 3.285332325 | 1.5433648   | 10.82210051 | 1.864397715 | 2.477725095 |
| 2.87373025  | 3.560457982 | 13.13334256 | 0.913397706 | 2.197382136 |

|             |             |             |             |             |
|-------------|-------------|-------------|-------------|-------------|
| 0.050805284 | 0.062911513 | 12.60918352 | 3.246019354 | 1.822675381 |
| 1.750059964 | 0.612620989 | 11.78680532 | 2.228186807 | 3.146122579 |
| 2.436761239 | 1.359884889 | 11.36763445 | 1.977213424 | 0.107932126 |
| 2.565763544 | 0           | 10.45262087 | 1.538910745 | 2.655729002 |
| 1.872522849 | 0.08017499  | 11.6684226  | 0.056985234 | 6.900745251 |
| 1.723865777 | 0.03696296  | 11.48575711 | 1.113726848 | 1.72815724  |
| 2.425449003 | 0.024540471 | 9.787840946 | 0.018029969 | 1.079922987 |
| 0.539881843 | 0           | 12.55254423 | 3.085943922 | 1.869822491 |
| 3.275593759 | 0.476949628 | 11.80276722 | 0.276314149 | 0.402081643 |
| 2.730158688 | 0.107435628 | 10.22894658 | 2.974246873 | 0.09692318  |
| 3.116452708 | 0.02653384  | 12.57491385 | 2.102832649 | 2.438508783 |
| 1.934788761 | 0.099495144 | 10.63010718 | 0.069929529 | 2.724405343 |
| 3.102491253 | 0.023239038 | 11.477808   | 1.670123722 | 2.098452985 |
| 1.668281195 | 4.878679543 | 11.52330794 | 0.159651426 | 0.216414503 |
| 0.014559583 | 1.056726026 | 13.03604312 | 1.05545844  | 1.057927936 |
| 2.283351641 | 0           | 11.2719221  | 0           | 1.961612427 |
| 0.067893103 | 0.084815815 | 10.62081438 | 0.060120932 | 0.076845006 |
| 1.795079001 | 6.354266041 | 11.5229473  | 1.812598492 | 1.122025893 |
| 1.564214473 | 0           | 11.75968272 | 0           | 0.982494012 |
| 2.370890937 | 0.099570805 | 10.60109279 | 1.918081113 | 0.089961568 |
| 2.096326904 | 0.153296035 | 11.39522563 | 0.104515138 | 2.568880811 |
| 2.097640914 | 0.552055846 | 13.14236087 | 3.280265409 | 1.002287693 |
| 1.883643895 | 0           | 13.33519649 | 2.366877409 | 2.681317602 |
| 1.703797888 | 1.694579266 | 14.06843916 | 0           | 1.403438615 |
| 2.160161092 | 0.17612665  | 11.29794518 | 0.118579665 | 2.188452208 |
| 1.452125953 | 0           | 10.43514724 | 0.892830322 | 2.645406038 |
| 0.093759844 | 0.118718936 | 10.83594691 | 2.408493564 | 4.593403051 |
| 1.241742928 | 0.078777613 | 13.05094828 | 0.056037746 | 3.514078495 |
| 1.663853008 | 0.020608562 | 11.29969129 | 1.064397571 | 0.018901987 |
| 0.009752744 | 1.038061955 | 11.08374702 | 1.037268049 | 1.038875815 |
| 2.731493465 | 0.715434683 | 10.19978647 | 1.235863274 | 3.232053045 |
| 2.886273653 | 0           | 11.65531215 | 1.4915952   | 0.919150953 |
| 2.274936386 | 0           | 11.24160594 | 0           | 0.964571499 |
| 1.098372304 | 1.097940533 | 11.24014926 | 0.022568785 | 2.723065924 |
| 1.55979594  | 0.979231807 | 10.03808121 | 1.560705482 | 0           |
| 1.36073501  | 0.121514412 | 11.92603868 | 0.084337594 | 1.370356008 |
| 1.307110074 | 0.101907083 | 10.56903938 | 0.071525412 | 1.95656218  |
| 1.630945571 | 0.011891925 | 11.20649262 | 1.037471536 | 1.632207155 |
| 1.038342599 | 0           | 11.22175422 | 1.952484476 | 3.259643338 |
| 2.037192027 | 6.972420815 | 12.30332349 | 1.133854758 | 3.698681575 |
| 3.321641515 | 5.304294167 | 11.59286655 | 1.107200713 | 2.145395138 |
| 1.293966767 | 3.98877252  | 12.63552373 | 1.3104512   | 6.576597856 |
| 0.068183068 | 1.89919778  | 10.85352497 | 0.060373599 | 2.671854992 |
| 1.761654034 | 0           | 10.53533884 | 0           | 1.744726462 |
| 0.074515147 | 1.284867818 | 12.04863444 | 0.065882751 | 1.928161332 |
| 1.777241639 | 3.042523426 | 11.79028621 | 0.037595131 | 3.233086598 |
| 2.60779524  | 1.605395602 | 12.12402578 | 0.003833804 | 5.58048711  |
| 0.902140458 | 0.903364625 | 11.98211396 | 2.19491635  | 3.434582721 |
| 0.67415027  | 0.680349812 | 11.02803201 | 0.679312084 | 0           |
| 0           | 1.277550601 | 10.78140491 | 0.754977014 | 2.214152262 |
| 2.254160035 | 1.901181885 | 10.69781178 | 1.742442377 | 1.472190315 |
| 0.046765456 | 2.839487241 | 11.01688991 | 1.174392676 | 2.235639706 |
| 1.521402377 | 0           | 12.03642354 | 0           | 1.519905044 |
| 2.555776945 | 0           | 13.86270023 | 0           | 0           |
| 1.862865042 | 10.57730041 | 11.44779502 | 1.462060459 | 2.174161725 |
| 2.144751675 | 1.211288892 | 10.57078597 | 1.909370116 | 6.350078958 |
| 2.491948005 | 0.041216466 | 11.13554932 | 0.029978433 | 1.132638094 |
| 2.051325951 | 0           | 12.0283481  | 2.319361252 | 3.391936634 |

| hsa-miR-4326 | hsa-miR-214-3p | hsa-miR-552-5p | hsa-miR-122-3p | hsa-miR-199b-3p |
|--------------|----------------|----------------|----------------|-----------------|
| 3.284806835  | 5.787177835    | 3.052337076    | 6.769638043    | 12.92658881     |
| 5.514586296  | 2.293668131    | 3.792056992    | 8.026097199    | 9.914854248     |
| 2.146041811  | 4.561343663    | 9.174864824    | 10.15387241    | 12.00907221     |
| 6.414403583  | 2.077074466    | 2.076212644    | 9.883962553    | 11.43045003     |
| 5.591675122  | 5.666872812    | 2.019560931    | 8.964076345    | 13.69011843     |
| 0.049571079  | 2.209668518    | 13.26823842    | 9.87283062     | 9.414300638     |
| 3.241247533  | 2.162095329    | 1.47996579     | 10.37549526    | 8.827116526     |
| 4.013837528  | 5.014551348    | 3.27323659     | 9.620388387    | 13.63970201     |
| 4.468296736  | 4.207135526    | 0              | 10.819244      | 13.01376481     |
| 6.301058727  | 0.045305769    | 1.148476184    | 8.923116149    | 7.261590825     |
| 6.054293687  | 5.447616652    | 1.067214987    | 0              | 13.21872786     |
| 0.227769073  | 4.360307298    | 0.236701221    | 9.299656537    | 13.6310866      |
| 4.078588295  | 1.992508703    | 8.391655494    | 11.19798418    | 10.96503342     |
| 5.803650333  | 4.363913363    | 2.559000854    | 8.362449341    | 11.07794477     |
| 5.819761317  | 3.340457156    | 1.563602265    | 9.162178636    | 10.55838608     |
| 4.964785316  | 3.660423095    | 3.001709766    | 10.31095847    | 11.0819653      |
| 5.804947741  | 0              | 0              | 0.574918067    | 11.30496189     |
| 2.88640526   | 6.483364514    | 1.549066881    | 9.928471919    | 14.00088988     |
| 3.829196374  | 4.621032134    | 0.082072033    | 10.59387014    | 13.07530243     |
| 4.29820402   | 1.722668906    | 3.762423623    | 9.161040431    | 9.648735613     |
| 4.661252742  | 0.170813675    | 9.040648185    | 9.465569145    | 8.772092285     |
| 4.941218181  | 2.550023993    | 9.283239687    | 9.509825968    | 7.504180075     |
| 4.046591897  | 2.938741352    | 12.5796195     | 10.0866275     | 9.642907312     |
| 4.737440409  | 2.570960311    | 3.191797583    | 10.83325477    | 10.93261832     |
| 2.911934453  | 4.438373688    | 1.439457545    | 8.732707304    | 12.92553694     |
| 4.383510703  | 2.123856992    | 4.333419888    | 10.46430218    | 10.5506163      |
| 5.848944069  | 1.559309534    | 0              | 8.079344518    | 9.504701291     |
| 2.589071138  | 3.085000211    | 1.192998051    | 9.714556848    | 10.49573341     |
| 0.084690508  | 2.681684801    | 9.206670696    | 10.64644521    | 10.82281859     |
| 3.511805223  | 0.038174875    | 5.287820254    | 9.980774327    | 8.811520839     |
| 4.279177531  | 6.009087648    | 3.104675664    | 8.05832547     | 12.94812972     |
| 4.169457197  | 2.321512669    | 3.321476265    | 10.75606674    | 9.979649971     |
| 5.585962434  | 4.223489501    | 1.01253445     | 1.643063554    | 13.4665263      |
| 0            | 5.351973052    | 0.765684152    | 9.058476787    | 13.39922114     |
| 5.406821504  | 3.752930714    | 3.229204147    | 9.491471521    | 11.83374739     |
| 5.345368388  | 0.268277601    | 6.450078961    | 10.15005831    | 8.308992098     |
| 5.531258733  | 4.257007605    | 0.131005524    | 10.34309259    | 12.18130266     |
| 5.446051165  | 1.356153234    | 2.530483993    | 9.665672186    | 8.62390862      |
| 4.390355751  | 0.080439341    | 12.42629144    | 10.26057012    | 9.405906666     |
| 4.014729147  | 2.90872169     | 8.346892029    | 9.518666085    | 11.19377969     |
| 4.366320446  | 1.959615442    | 1.307457027    | 10.3477947     | 9.606138366     |
| 2.876508992  | 0.06336165     | 8.425785653    | 9.613931819    | 9.028865548     |
| 4.145371287  | 3.540835559    | 0.130536096    | 10.17234954    | 11.18218412     |
| 6.149683319  | 4.53071371     | 2.244348201    | 8.856809973    | 13.04437399     |
| 6.402693469  | 5.388772722    | 0.936945378    | 6.700819383    | 13.29254345     |
| 4.878064767  | 3.343473543    | 0              | 9.277391954    | 9.753902783     |
| 4.79197437   | 1.495369672    | 1.483744673    | 7.389902436    | 9.516337186     |
| 4.503760861  | 2.258361651    | 0.199512891    | 9.687404209    | 9.407320989     |
| 0.113459159  | 2.790439703    | 4.518928589    | 8.843096946    | 9.906263609     |
| 4.683661238  | 2.128668542    | 0              | 8.65544324     | 9.159783485     |
| 3.335187967  | 4.261499698    | 2.011499893    | 8.948011584    | 12.30608795     |
| 5.483483441  | 4.40891785     | 2.457223651    | 8.444892834    | 12.50714        |
| 4.166317166  | 1.173495982    | 1.790133091    | 9.782435991    | 7.951530383     |
| 5.195858712  | 3.27180168     | 0.02145798     | 8.960097071    | 11.97775628     |
| 4.159662647  | 2.061676479    | 2.650968047    | 10.19589872    | 10.34364496     |
| 4.862092203  | 0.771245027    | 4.968869977    | 8.279773455    | 10.05648138     |

|             |             |             |             |             |
|-------------|-------------|-------------|-------------|-------------|
| 0           | 5.654116566 | 0.604009871 | 9.502282544 | 13.2957919  |
| 2.604863069 | 0           | 6.962262696 | 10.62768873 | 7.714385408 |
| 5.21620967  | 1.214040719 | 1.597139647 | 6.809801827 | 8.669053903 |
| 5.588314868 | 1.539431318 | 2.63909025  | 7.109306534 | 9.339006865 |
| 2.477912145 | 2.744720384 | 4.42309096  | 10.16625395 | 10.76595475 |
| 3.541793159 | 4.124319645 | 2.55957707  | 8.408023597 | 12.76886787 |
| 3.784426996 | 4.162486082 | 3.065096215 | 9.681910812 | 12.87378762 |
| 3.746363182 | 3.044024329 | 12.26117227 | 10.8407353  | 10.30025003 |
| 4.046935407 | 4.817320558 | 2.286201344 | 2.961756738 | 12.7412616  |
| 4.119797205 | 3.625705907 | 8.282497523 | 8.211263872 | 13.17304125 |
| 5.854156239 | 2.586225256 | 0.062425175 | 8.822608038 | 11.69812805 |
| 3.678083746 | 4.500946611 | 7.325068456 | 9.89956934  | 11.58401657 |
| 4.060454753 | 2.782168643 | 3.973013088 | 9.590058836 | 10.51178289 |
| 4.963331382 | 4.456801959 | 2.137501303 | 9.666499951 | 13.47678597 |
| 4.47365742  | 2.484616324 | 0           | 7.564328902 | 10.52651908 |
| 5.321037245 | 1.181500337 | 2.565593952 | 9.002296166 | 7.453644728 |
| 4.925667426 | 3.088273652 | 9.166687375 | 11.17252824 | 11.29387359 |
| 4.469815044 | 2.594386155 | 1.592888731 | 8.314556555 | 11.47176639 |
| 4.467245177 | 2.71764202  | 0.377126686 | 10.36824992 | 11.86771551 |
| 8.320700001 | 2.852066533 | 2.364313387 | 8.225023516 | 11.48431969 |
| 3.097299735 | 3.956696544 | 0.334495455 | 9.568065802 | 10.88975005 |
| 4.467181467 | 1.643532147 | 1.047050438 | 11.17461212 | 8.51658104  |
| 4.960393376 | 2.330145757 | 3.186727078 | 10.02186921 | 8.429299463 |
| 3.735381131 | 1.92824485  | 0.093505897 | 9.900297598 | 12.05620865 |
| 5.275038222 | 0.927586602 | 4.690290216 | 8.614489725 | 10.12161152 |
| 4.22345741  | 4.289675085 | 6.370845559 | 8.751654596 | 13.16547369 |
| 3.546805285 | 5.959989479 | 6.732014908 | 9.938785352 | 13.399711   |
| 5.292616372 | 3.971666438 | 10.10694079 | 10.54638533 | 13.15180922 |
| 5.952489644 | 3.878255561 | 1.425659806 | 8.317519982 | 12.14423415 |
| 4.790357258 | 1.849015872 | 1.215101436 | 10.70755681 | 9.182434938 |
| 5.752360607 | 2.36903217  | 8.122545246 | 10.50415391 | 9.916354704 |
| 3.631504784 | 3.42578954  | 11.78368094 | 10.16814031 | 10.71541375 |
| 5.026166777 | 4.039767147 | 0.686393099 | 9.70357777  | 12.79986666 |
| 3.961636301 | 0.742633423 | 0.748628913 | 9.552757998 | 7.881664212 |
| 5.996913526 | 1.294698666 | 1.581564727 | 6.967392449 | 8.183154569 |
| 4.325400987 | 2.460845779 | 11.47053859 | 9.098995082 | 11.23736947 |
| 2.759013005 | 6.287575421 | 2.276402295 | 10.23924732 | 13.6935076  |
| 4.007608424 | 4.814997553 | 2.591918505 | 8.953437304 | 13.71342186 |
| 5.189065017 | 3.114024374 | 2.886493976 | 10.52276342 | 11.39845721 |
| 4.13573779  | 2.158559634 | 1.445008629 | 9.046465903 | 9.017546502 |
| 4.221328953 | 4.766314122 | 2.010870966 | 9.097894657 | 12.50226094 |
| 3.753989239 | 3.40722817  | 0           | 10.88305311 | 11.7004184  |
| 4.656342327 | 1.223523435 | 3.317796847 | 9.64469044  | 8.254128645 |
| 5.609544386 | 2.74842071  | 0.390406251 | 9.783652907 | 12.04786451 |
| 2.590279589 | 1.406000438 | 0           | 9.98947687  | 9.524501936 |
| 3.569447222 | 2.204369821 | 0           | 8.651792712 | 11.82510529 |
| 4.942555479 | 4.237068328 | 1.815756173 | 8.760647817 | 12.82966834 |
| 6.374907228 | 5.676113917 | 5.115373098 | 6.41185397  | 13.22556735 |
| 4.940154508 | 3.828540229 | 7.296380639 | 9.221875872 | 12.63783836 |
| 4.112037449 | 3.483257848 | 9.102533559 | 9.941642841 | 12.34291482 |
| 3.306085048 | 4.309814362 | 7.598581716 | 9.503237934 | 13.33401481 |
| 3.475712472 | 5.808609577 | 0.7998656   | 9.178511467 | 12.72721552 |
| 4.573444941 | 3.771828231 | 5.213199431 | 9.241614754 | 13.01040955 |
| 5.976696534 | 2.444041972 | 0.114911927 | 10.9998718  | 9.790934563 |
| 4.245244257 | 5.227716933 | 4.984266172 | 0.773907387 | 13.56315009 |
| 3.244570793 | 5.07374148  | 1.714584918 | 9.295753532 | 13.57159876 |
| 5.567095562 | 4.384571601 | 6.409459741 | 7.719708116 | 13.10387276 |
| 5.498429717 | 0           | 4.248962745 | 8.001118583 | 8.235020249 |

|             |             |             |             |             |
|-------------|-------------|-------------|-------------|-------------|
| 3.87820924  | 0.05978731  | 2.255017205 | 10.16318013 | 9.274230783 |
| 4.162607522 | 5.209465914 | 2.672446144 | 8.799266832 | 13.16287558 |
| 5.121148028 | 1.366137881 | 8.281269627 | 8.281932346 | 8.496752315 |
| 3.039395539 | 3.92316306  | 1.514920604 | 5.342081402 | 11.79873906 |
| 4.068138059 | 1.884790633 | 0.080771199 | 9.050020036 | 9.342610729 |
| 3.879122123 | 4.880912753 | 5.273022604 | 8.712656502 | 13.76179131 |
| 2.697475863 | 3.286702682 | 5.90765059  | 11.29527969 | 10.78521864 |
| 5.387979672 | 4.178206252 | 3.108661081 | 8.300882919 | 11.23229973 |
| 0.458464681 | 0.434173322 | 0.48347854  | 10.7186701  | 8.170384992 |
| 3.463512373 | 2.421009796 | 10.05598534 | 9.887889511 | 11.02520416 |
| 4.833707006 | 1.086088003 | 8.375893158 | 10.12367308 | 9.080281525 |
| 1.305722101 | 2.729923856 | 1.945571726 | 10.27861805 | 11.68654904 |
| 4.924790694 | 3.571710955 | 0.023391616 | 8.706117672 | 13.04302875 |
| 0.239093534 | 4.254742169 | 0.248645168 | 9.865465903 | 12.72043392 |
| 4.549042738 | 1.057777053 | 5.220528932 | 9.993948717 | 9.12371485  |
| 3.655557191 | 2.281523585 | 4.654085507 | 9.296594131 | 9.219080418 |
| 4.917951982 | 2.946572449 | 1.258238991 | 10.12295175 | 10.22903872 |
| 4.677588704 | 4.012576692 | 6.8951034   | 9.548299377 | 13.26558633 |
| 5.14210484  | 4.294795385 | 5.526413472 | 9.015803716 | 13.21156424 |
| 5.951292664 | 1.951192024 | 1.300376473 | 10.65774463 | 8.788539761 |
| 3.631882536 | 5.040657112 | 6.656127907 | 10.08130802 | 12.71365305 |
| 4.036988618 | 2.412244073 | 2.558163784 | 9.536080793 | 12.01161483 |
| 3.568097374 | 3.19214277  | 2.678032029 | 6.969199248 | 12.1736667  |
| 3.08034101  | 5.749733247 | 0           | 8.962346527 | 14.18123581 |
| 1.517578576 | 0.16540921  | 10.78695412 | 10.37810818 | 9.768947559 |
| 3.633029116 | 4.992346936 | 2.167815016 | 8.132712913 | 13.89016732 |
| 4.525876039 | 2.799601637 | 0.1196721   | 9.045646869 | 10.36582965 |
| 0.077078825 | 0.074740923 | 0.079361742 | 10.1356009  | 9.498688575 |
| 3.269181602 | 3.097613734 | 0.020743043 | 10.30270773 | 11.99334152 |
| 4.382130724 | 4.760284328 | 7.384394773 | 8.713722161 | 12.90355825 |
| 5.429861969 | 2.990738315 | 0           | 6.016494252 | 11.37899917 |
| 3.779930866 | 2.468500649 | 11.28021055 | 9.377663639 | 10.55405912 |
| 0           | 1.541777837 | 0           | 10.84045241 | 9.457567185 |
| 4.677080397 | 1.099748366 | 3.469559065 | 10.23871874 | 7.147142356 |
| 4.214697535 | 2.292517834 | 1.972242497 | 10.78066462 | 11.69445887 |
| 5.451297975 | 2.809528677 | 2.808834284 | 11.11230224 | 11.61241059 |
| 4.784908524 | 3.011662886 | 12.18393872 | 10.76218041 | 11.25151422 |
| 2.375700215 | 1.038980346 | 5.347348633 | 11.11429239 | 9.422810389 |
| 4.577697572 | 5.776172973 | 0           | 8.013021238 | 13.22535585 |
| 0.634075106 | 3.540672578 | 1.782776508 | 8.706999029 | 13.27226269 |
| 3.976537607 | 2.146492949 | 5.460939382 | 8.717566065 | 8.017400725 |
| 0           | 4.089126175 | 8.159692918 | 7.812549523 | 12.3457252  |
| 4.981290161 | 5.091123188 | 2.338125949 | 9.462755772 | 11.9719622  |
| 4.299274346 | 5.766374161 | 0.482870689 | 9.946411716 | 13.89131185 |
| 3.582792143 | 0.088486495 | 1.282869193 | 8.416423083 | 10.13045128 |
| 5.060304205 | 4.333994571 | 4.777115902 | 9.453349099 | 12.82384996 |
| 5.384460735 | 5.070845151 | 1.016567749 | 7.828453979 | 12.39587445 |
| 4.012836298 | 2.661631441 | 10.54465339 | 9.743755267 | 11.25783257 |
| 3.767770988 | 6.051253294 | 3.836546431 | 10.39017215 | 13.25512005 |
| 2.775716082 | 4.626349814 | 1.964741009 | 9.074236224 | 13.23160913 |
| 0           | 2.609356537 | 5.842764425 | 8.739545559 | 10.27460662 |
| 5.186142186 | 2.237691026 | 1.179051873 | 9.963876206 | 9.593992807 |
| 4.438873616 | 3.241252112 | 0           | 9.612499111 | 11.9419567  |
| 4.28807025  | 0           | 0           | 11.06271902 | 7.913139795 |
| 4.222606652 | 3.296346917 | 7.109327795 | 9.699653613 | 12.76567526 |
| 4.128720142 | 2.688471254 | 1.885902698 | 8.712764424 | 11.93450551 |
| 4.106403534 | 1.744598479 | 11.13285675 | 9.137520179 | 6.922857137 |
| 3.490983882 | 4.67725232  | 7.565304167 | 8.509178295 | 12.36181341 |

| hsa-miR-199a-3p | hsa-miR-512-3p | hsa-miR-216b-5p | hsa-miR-767-3p | hsa-miR-552-3p |
|-----------------|----------------|-----------------|----------------|----------------|
| 12.93138397     | 0.113125365    | 4.677199585     | 0.093595616    | 2.437045856    |
| 9.918671725     | 0.072762991    | 6.744316918     | 0.061010335    | 1.854230711    |
| 12.01025986     | 0.03478884     | 0.034924885     | 0.029543826    | 7.7621548      |
| 11.43323792     | 0.018028563    | 2.89151907      | 0.015397695    | 1.057344998    |
| 13.70903878     | 0.122637017    | 4.630646483     | 0.101149378    | 0.122691538    |
| 9.41682115      | 0.050801721    | 0.051007575     | 0.04291035     | 13.63861555    |
| 8.832377994     | 0.166226492    | 3.850246756     | 0.135174748    | 1.481507138    |
| 13.64251041     | 2.091222532    | 5.319975915     | 0.018433161    | 2.908032906    |
| 13.0177689      | 0.928723604    | 3.210666309     | 0              | 1.903616912    |
| 7.261590687     | 0.047784569    | 1.148276184     | 0.040402824    | 0.047802816    |
| 13.2249422      | 0.59260522     | 6.347595613     | 0              | 0              |
| 13.63331364     | 0.235707838    | 3.176797705     | 0.187482941    | 0.23583515     |
| 10.97536962     | 0.112459576    | 3.479791723     | 0.09306511     | 7.389932733    |
| 11.0812095      | 0.982152445    | 8.305540862     | 0              | 3.142575175    |
| 10.58396104     | 1.565695658    | 0.199816835     | 0.159946918    | 0.198850588    |
| 11.08505644     | 1.134000311    | 5.382800156     | 1.136050534    | 1.133949521    |
| 11.30821143     | 1.674954552    | 0.574132725     | 4.957048909    | 0              |
| 14.00315456     | 3.415837753    | 5.967782433     | 1.73901451     | 1.331000827    |
| 13.07683987     | 3.957636741    | 7.892793968     | 1.88140289     | 0.081843927    |
| 9.648735548     | 1.709735802    | 10.72116588     | 0.203090974    | 3.242238656    |
| 8.789120505     | 1.525177635    | 2.203966934     | 1.524520332    | 8.547770438    |
| 7.522201547     | 3.024339337    | 3.665698148     | 0.238485514    | 7.671916178    |
| 9.642907305     | 2.939015793    | 1.089584452     | 0.02424506     | 10.91970896    |
| 10.93969201     | 6.128749248    | 9.111813257     | 2.883244117    | 2.11409827     |
| 12.92996696     | 0.150861336    | 10.10454172     | 0.123290346    | 1.440852546    |
| 10.55391637     | 0              | 7.745441339     | 0              | 4.333192515    |
| 9.504701293     | 0              | 0.979537526     | 0              | 0              |
| 10.49573344     | 0.062737644    | 7.416720115     | 0.052780612    | 1.193562601    |
| 10.826005       | 0.086958281    | 0.0873385       | 1.266996691    | 7.848937419    |
| 8.811520794     | 0.040229064    | 1.125477121     | 0.034101152    | 4.195558447    |
| 12.95159658     | 0.505868372    | 3.608638415     | 0.938621402    | 0.949873155    |
| 9.988195078     | 0.99970665     | 8.996690637     | 0              | 1.999606767    |
| 13.47018193     | 1.874751293    | 1.013070593     | 0              | 0.551652725    |
| 13.40181772     | 2.941069889    | 3.198542459     | 0              | 0.765125572    |
| 11.84625813     | 1.942841959    | 3.757557919     | 0.082125951    | 0.098837269    |
| 8.338827375     | 2.506039266    | 10.12016993     | 4.783601442    | 5.010214585    |
| 12.18879304     | 1.386212947    | 1.384283633     | 0.107394886    | 0.130605108    |
| 8.629771024     | 1.359794893    | 7.371637343     | 0              | 1.752212685    |
| 9.411544236     | 0.085200244    | 1.895775306     | 0.071143985    | 11.51453559    |
| 11.19976477     | 0.021794576    | 4.196167214     | 0.018590331    | 7.612854087    |
| 9.61130203      | 0.102527295    | 0.102989765     | 0.085123408    | 2.399853437    |
| 9.032330657     | 0.066973662    | 1.205171401     | 0.056264637    | 7.834827575    |
| 11.18686144     | 1.384937122    | 0.130697464     | 0.107026709    | 0.130137462    |
| 13.06564608     | 4.610751838    | 2.244081633     | 0.050820886    | 0.060383868    |
| 13.30635934     | 0              | 5.180271626     | 0              | 0              |
| 9.755433386     | 4.522000893    | 4.921626754     | 0              | 0              |
| 9.567902342     | 0.167672699    | 9.39217455      | 2.930067341    | 1.485299798    |
| 9.407320889     | 0.198724209    | 3.96005302      | 0.159927876    | 0.19882531     |
| 9.906263611     | 0.11667962     | 11.17863846     | 0.096423762    | 2.790540558    |
| 9.174753056     | 0              | 2.793863067     | 0              | 0.866548357    |
| 12.30867524     | 1.595520813    | 2.011487828     | 0.002296819    | 0.002676128    |
| 12.5098845      | 1.159914207    | 5.29960489      | 0              | 0.664026255    |
| 7.972503781     | 1.169786115    | 5.823613642     | 0.046158241    | 0.054740023    |
| 11.98661797     | 0.021397982    | 2.682357551     | 1.667558806    | 0.021405681    |
| 10.34715102     | 0.014368016    | 2.385866312     | 0.012286623    | 1.641012567    |
| 10.06264133     | 10.5716795     | 0               | 3.453257914    | 4.370500678    |



|             |             |             |             |             |
|-------------|-------------|-------------|-------------|-------------|
| 13.29887228 | 0           | 8.524372676 | 2.178895407 | 0           |
| 7.720234976 | 2.605774185 | 1.819949474 | 0           | 5.818362517 |
| 8.671516604 | 2.141390467 | 1.895646085 | 3.616246535 | 0           |
| 9.34342834  | 0.675316769 | 0           | 0           | 1.174896073 |
| 10.77158329 | 1.111811714 | 12.46302366 | 5.806137358 | 4.173944798 |
| 12.77192358 | 1.383056623 | 7.893291294 | 4.602727448 | 1.383117784 |
| 12.87768233 | 0           | 5.375050263 | 0           | 1.86304711  |
| 10.30261515 | 0.009188467 | 8.213551715 | 0.007871286 | 11.92357436 |
| 12.74453115 | 0           | 10.21725844 | 0           | 1.965944886 |
| 13.17539493 | 1.206536689 | 3.62832903  | 0.056375656 | 7.435896227 |
| 11.70670008 | 1.192146973 | 4.821888391 | 0.052365795 | 0.062258605 |
| 11.59093374 | 0           | 2.301962327 | 0           | 5.883415816 |
| 10.51371937 | 5.398407393 | 7.364092257 | 3.675348842 | 4.060373968 |
| 13.47979733 | 1.055601822 | 8.599792063 | 0           | 1.694861291 |
| 10.5283235  | 0           | 8.609214392 | 2.487888314 | 0           |
| 7.453644575 | 0.057344214 | 1.799217387 | 0.04833035  | 0.057366569 |
| 11.32205649 | 0.207160978 | 1.583868322 | 0.166270654 | 6.508344151 |
| 11.47789468 | 7.36828598  | 2.331014328 | 3.331376367 | 1.006475273 |
| 11.86872356 | 0.37519359  | 6.575694729 | 0.285893943 | 0.375441108 |
| 11.51015683 | 0.00946155  | 2.040326913 | 0.008104468 | 1.030279361 |
| 10.89522831 | 0.33287576  | 4.36275592  | 0.256920809 | 2.613257065 |
| 8.520733155 | 0.014798933 | 0.014854195 | 0.012653258 | 0.014804176 |
| 8.439491009 | 0.830489109 | 0           | 0           | 2.076965903 |
| 12.05851024 | 2.366669223 | 11.1687556  | 3.381053033 | 1.924011205 |
| 10.12755557 | 1.904151463 | 5.85831981  | 3.593708256 | 4.343263172 |
| 13.1693086  | 0           | 3.853715801 | 0           | 5.401946937 |
| 13.40349525 | 2.528803509 | 10.75830107 | 3.37990796  | 5.939207626 |
| 13.15568512 | 0           | 2.296647842 | 0.981682623 | 8.764421486 |
| 12.14859919 | 0           | 0           | 0           | 0           |
| 9.182434887 | 1.215819978 | 7.212063545 | 0.058968789 | 0.070297903 |
| 9.925149278 | 3.909050107 | 8.143354801 | 4.748478251 | 6.774214923 |
| 10.73732032 | 1.449225296 | 0.154699702 | 0.125677013 | 9.917613942 |
| 12.80204081 | 0           | 10.18518898 | 5.12075282  | 1.18826344  |
| 7.881664364 | 0           | 4.37125813  | 0           | 1.268836068 |
| 8.196053978 | 2.612312193 | 0           | 0           | 0.515874739 |
| 11.24337677 | 1.09962625  | 0.031730982 | 0.026871661 | 9.931756962 |
| 13.69759201 | 0           | 3.271990424 | 0           | 0           |
| 13.71698154 | 1.590852183 | 2.591912395 | 0.001280251 | 0.001491072 |
| 11.40656288 | 1.214639698 | 5.583846    | 0.058638827 | 2.615564518 |
| 9.022403181 | 2.417249555 | 11.96747563 | 0           | 0           |
| 12.50817926 | 0           | 7.903617349 | 0           | 1.705015502 |
| 11.70374926 | 0           | 4.193696738 | 0           | 0           |
| 8.260131486 | 0.071277102 | 3.913054421 | 0.059794049 | 3.491628992 |
| 12.06508215 | 2.008882388 | 0.391126527 | 0.294765667 | 0.388631113 |
| 9.529450369 | 1.80644796  | 10.02398559 | 0.854945269 | 0           |
| 11.82762961 | 0.918083258 | 2.205504495 | 2.207584453 | 0           |
| 12.83488227 | 0           | 5.76886771  | 0           | 1.416892374 |
| 13.23112302 | 0.84249374  | 0.429186101 | 0           | 3.704506586 |
| 12.6423127  | 1.083802847 | 5.420147826 | 0.02256267  | 5.993496985 |
| 12.34573922 | 0.004825132 | 2.020670699 | 0.004139607 | 8.154947591 |
| 13.33741674 | 1.695327323 | 2.714333433 | 2.117676698 | 6.87482647  |
| 12.72954524 | 3.665560859 | 9.127153914 | 2.506499873 | 0.799378685 |
| 13.01340346 | 9.34966028  | 5.398357051 | 0           | 4.407674062 |
| 9.809647757 | 0.114521056 | 4.205560969 | 0.094706962 | 0.114571188 |
| 13.56486204 | 0           | 0.377377759 | 0           | 4.445993427 |
| 13.57527075 | 0           | 2.988002171 | 0           | 0.792339167 |
| 13.10863886 | 1.174049068 | 4.509033845 | 0           | 5.143374804 |
| 8.23933218  | 4.027442749 | 9.224127029 | 0           | 3.034290734 |

|             |             |             |             |             |
|-------------|-------------|-------------|-------------|-------------|
| 9.280003254 | 0.063168362 | 0.06343124  | 0.053135318 | 2.860003182 |
| 13.16487767 | 0           | 1.095530061 | 0           | 1.094032225 |
| 8.525810527 | 3.983084426 | 7.447395549 | 3.803037832 | 6.798317929 |
| 11.80210726 | 0           | 2.113060782 | 0           | 0.910023358 |
| 9.345517475 | 10.54436924 | 5.906944453 | 1.248407516 | 0.080547303 |
| 13.76569458 | 0.037105544 | 4.707140216 | 0.031486596 | 4.504733421 |
| 10.79234775 | 1.680155796 | 0.024726613 | 0.020990788 | 4.824873074 |
| 11.23692411 | 1.010297347 | 4.125056295 | 0           | 2.252641392 |
| 8.216946267 | 0.480654782 | 2.195106389 | 2.152286165 | 0.481016078 |
| 11.02618616 | 0.107915896 | 1.322071553 | 0.08943848  | 9.178247616 |
| 9.086135066 | 2.111840113 | 12.25178038 | 6.210608001 | 7.413226761 |
| 11.69139691 | 0.099933027 | 0.100381491 | 0.083040515 | 0.099975549 |
| 13.0458152  | 0.023325919 | 2.424673737 | 0.019886194 | 1.073918559 |
| 12.74263188 | 0.247582149 | 7.898622957 | 0.196194808 | 1.686580905 |
| 9.131967448 | 8.174846462 | 8.321714499 | 5.083297753 | 4.675324953 |
| 9.223756715 | 2.956916399 | 7.112367971 | 0           | 2.28176915  |
| 10.23858442 | 0.085178248 | 9.802703543 | 0.071126136 | 2.33750039  |
| 13.26826689 | 4.777807604 | 8.793619839 | 0           | 6.364577892 |
| 13.22565967 | 0           | 5.141896453 | 0           | 2.974158327 |
| 8.82429793  | 1.301410019 | 9.638394097 | 0.083101632 | 0.100051647 |
| 12.720545   | 1.449512447 | 4.462715606 | 0.125760757 | 5.126286951 |
| 12.01432085 | 0.553217066 | 3.287431673 | 0           | 2.414898161 |
| 12.17515964 | 0           | 4.276365213 | 0           | 0           |
| 14.18461953 | 0           | 1.413091738 | 0           | 0.585607906 |
| 9.791328814 | 0.17701989  | 2.646304431 | 0.143453092 | 7.753080751 |
| 13.89383991 | 0.892100279 | 6.259472248 | 0           | 1.451357767 |
| 10.36743044 | 0.119261334 | 6.244671844 | 0.098473928 | 0.119314017 |
| 9.506468372 | 0.079110104 | 4.455022836 | 0.066192302 | 1.876147138 |
| 11.99562795 | 0.020685139 | 10.82123845 | 1.066848183 | 0.02069257  |
| 12.90925017 | 0.01186965  | 1.631209873 | 0.010158822 | 6.817182118 |
| 11.38241348 | 0.716256441 | 4.709901446 | 0           | 0           |
| 10.56277596 | 0           | 0           | 0           | 10.974135   |
| 9.459536655 | 0           | 0.965594834 | 0           | 0           |
| 7.158465023 | 1.097605106 | 0.031072987 | 0.02632042  | 3.144780008 |
| 11.69658202 | 0           | 1.559606422 | 0           | 0.979307285 |
| 11.63535621 | 0.122072549 | 0.122644409 | 0.100702411 | 0.122126762 |
| 11.25564031 | 8.698407676 | 9.968621488 | 3.413792846 | 11.28850069 |
| 9.425004706 | 0.011935216 | 5.309834861 | 0.01021471  | 4.060214712 |
| 13.22785821 | 0.575947968 | 1.918923645 | 0           | 0           |
| 13.27427879 | 9.24768626  | 6.143973453 | 3.104556895 | 1.491129181 |
| 8.017400656 | 8.740135371 | 7.912797505 | 4.328523024 | 4.49437642  |
| 12.34987598 | 8.134335868 | 4.654882232 | 4.981387771 | 7.599483    |
| 11.97434748 | 0.085555165 | 1.89697748  | 0.071431942 | 1.898173082 |
| 13.89281193 | 0.916912958 | 1.949766443 | 0           | 0           |
| 10.13220362 | 0.093814896 | 4.12352209  | 0.078114252 | 0.093854334 |
| 12.83051279 | 5.426316181 | 9.919081526 | 0.04409643  | 3.704218    |
| 12.40186529 | 11.44853808 | 4.026321674 | 3.023857827 | 1.01661281  |
| 11.26726167 | 0.903671591 | 0           | 0           | 9.858190777 |
| 13.2604343  | 4.602944392 | 8.127100484 | 0           | 3.264340517 |
| 13.23349244 | 0           | 4.821963386 | 0           | 0.755541112 |
| 10.27847394 | 2.718586677 | 9.054390738 | 6.062496904 | 4.535590578 |
| 9.596270624 | 5.775622938 | 10.09500019 | 4.840596004 | 1.179572874 |
| 11.94780934 | 0           | 0           | 0           | 1.520820079 |
| 7.924773585 | 0.978948198 | 3.289393887 | 0           | 0           |
| 12.77024905 | 10.97721852 | 10.29187922 | 3.749129916 | 6.316482239 |
| 11.93831346 | 3.090007854 | 4.069707772 | 4.09909323  | 0.704264613 |
| 6.936546063 | 10.13392107 | 9.625366902 | 4.092491958 | 10.18070592 |
| 12.36484821 | 7.541340267 | 7.658623255 | 3.026472856 | 6.380219887 |

| hsa-miR-372-3p | hsa-miR-216a-5p | hsa-miR-1270 | hsa-miR-33b-3p | hsa-miR-183-3p |
|----------------|-----------------|--------------|----------------|----------------|
| 0.113626498    | 4.593703631     | 3.475601386  | 2.405725269    | 0.075318698    |
| 0.07306024     | 5.934889389     | 5.464774954  | 1.221074002    | 1.212883665    |
| 3.161642051    | 1.717707063     | 2.740733444  | 0.027262369    | 1.105581809    |
| 0.018093822    | 1.057156866     | 2.667384146  | 0.014243815    | 0.012772428    |
| 2.468384313    | 4.793525348     | 2.024812424  | 0.092197331    | 0.081166195    |
| 2.539105658    | 0.050976166     | 1.161740193  | 3.015883077    | 0.035209915    |
| 1.479344678    | 3.673995813     | 1.491568138  | 3.396495724    | 1.446916773    |
| 1.068294622    | 6.177605079     | 0.020245034  | 2.086755674    | 2.082616351    |
| 0.929006789    | 1.903860154     | 0.927010639  | 3.068398709    | 0              |
| 1.148306637    | 0.047947574     | 6.205705364  | 2.779702476    | 1.7515161      |
| 0              | 5.453239278     | 1.701214898  | 1.966063563    | 0.590883487    |
| 0.237000974    | 4.380143996     | 1.669732906  | 3.778290801    | 2.694570213    |
| 2.43335239     | 3.810960616     | 1.34376439   | 0.084944912    | 2.97947432     |
| 0.982225234    | 7.592245238     | 1.975815776  | 2.560648976    | 0.98257329     |
| 0.199776227    | 0.199653782     | 2.256258199  | 1.546551869    | 2.608922281    |
| 0.043006473    | 5.256895837     | 0.040014112  | 1.133525897    | 1.129002092    |
| 1.67671801     | 1.041012719     | 2.111380441  | 1.931827483    | 0              |
| 1.333275034    | 6.823986524     | 3.04568284   | 1.073242457    | 0              |
| 1.24826782     | 7.56247239      | 2.660828232  | 2.304355427    | 1.858475038    |
| 2.412818511    | 10.28135407     | 4.41359286   | 1.677524422    | 2.299214412    |
| 1.522567599    | 1.522928954     | 4.540658497  | 0.133808776    | 0.116690168    |
| 3.904849657    | 1.822370401     | 3.642630577  | 0.212518967    | 0.182167795    |
| 4.389470398    | 1.089654734     | 0.026663629  | 0.02239348     | 0.020040798    |
| 2.912868156    | 8.341711319     | 3.416069255  | 1.433980596    | 0.098984492    |
| 0.151578451    | 9.076550799     | 2.563838334  | 0.1119602      | 0.098119725    |
| 0.702336809    | 7.023261082     | 2.684859521  | 2.145724842    | 0              |
| 0              | 1.559773203     | 1.97214331   | 0.979342882    | 1.56121168     |
| 1.818307326    | 8.319926557     | 1.198124719  | 1.810017531    | 1.799608214    |
| 3.978260685    | 1.263186906     | 1.270222889  | 1.888721624    | 0.058867363    |
| 0.040382267    | 1.125577202     | 0.037587635  | 2.750660665    | 0.028078366    |
| 0.507350497    | 4.554246607     | 3.677506474  | 0.944714541    | 2.537344544    |
| 1.999607957    | 8.67546845      | 0.999699621  | 0.999705436    | 0              |
| 1.361366436    | 0.55274037      | 1.350363516  | 0              | 2.993738997    |
| 0.765902708    | 3.691560896     | 1.671353444  | 1.292846148    | 4.118091294    |
| 2.724337348    | 4.252385794     | 2.387507144  | 1.293758975    | 0.066376691    |
| 0.292523325    | 9.65494315      | 4.753952302  | 0.202962779    | 0.174332248    |
| 1.384370535    | 1.384624061     | 0.120388468  | 2.459126322    | 0.085976341    |
| 3.033279801    | 8.072797398     | 3.294024399  | 1.759239658    | 3.330030848    |
| 0.085557339    | 2.33668621      | 0.079087515  | 0.065179773    | 0.057742404    |
| 0.021874163    | 4.108413948     | 0.020418387  | 1.069185812    | 0.015401149    |
| 1.30708258     | 1.95396838      | 1.315399658  | 1.303927209    | 0.068720987    |
| 1.205214605    | 0.067211757     | 2.873696702  | 1.824082317    | 0.045928475    |
| 0.130673943    | 2.043040621     | 2.048634777  | 0.097457599    | 0.085693394    |
| 0.060600389    | 4.285996001     | 3.269587351  | 1.802066025    | 0.04157249     |
| 0              | 4.21890245      | 3.806904003  | 1.917797192    | 0              |
| 1.90027105     | 4.049741575     | 4.273795057  | 2.703685972    | 0              |
| 3.243452227    | 8.287455249     | 5.497861392  | 0.123493888    | 0.107945153    |
| 3.063710627    | 3.064047338     | 1.576574621  | 0.144347432    | 0.125584397    |
| 1.999939861    | 10.68369826     | 2.788243122  | 1.979962797    | 0.077511853    |
| 0              | 3.110733065     | 2.961813157  | 0.865073948    | 0              |
| 0.002684543    | 1.595486985     | 1.008812561  | 3.011905456    | 2.010519239    |
| 0              | 4.855672434     | 3.877375141  | 1.536338846    | 0              |
| 3.052090591    | 6.314542657     | 3.953550289  | 1.168810161    | 2.526942522    |
| 0.021476049    | 3.689670234     | 1.669075338  | 1.067950598    | 0.015124952    |
| 0.014419579    | 2.874766171     | 0.013475383  | 1.045911199    | 0.010204438    |
| 12.25690747    | 0.776718096     | 4.791498756  | 1.306957005    | 1.315437433    |

|             |             |             |             |             |
|-------------|-------------|-------------|-------------|-------------|
| 0           | 9.283965141 | 2.165865645 | 2.378289857 | 0           |
| 2.606267961 | 0.86792558  | 0           | 0.866071489 | 0           |
| 0           | 2.537131228 | 5.330658801 | 1.221508561 | 2.393644973 |
| 1.176124667 | 0.676279048 | 4.642663842 | 0           | 0           |
| 1.111328707 | 12.01448908 | 3.753105504 | 0.027864982 | 2.458988424 |
| 0           | 8.173639222 | 0           | 2.932421939 | 2.365987018 |
| 0           | 5.421287519 | 1.186929702 | 2.528467355 | 1.20552759  |
| 2.039181047 | 8.048621024 | 1.030125028 | 0.007291051 | 0.00654891  |
| 0           | 10.3690403  | 2.76971311  | 0.974533707 | 1.555661964 |
| 1.205610516 | 4.012460969 | 2.874234984 | 3.595564658 | 0.046017121 |
| 1.191290008 | 4.618886655 | 3.603467066 | 0.048131034 | 0.042810552 |
| 0           | 2.301950868 | 1.980780208 | 3.301949646 | 0           |
| 1.977353708 | 7.381169309 | 3.780993333 | 0.983003969 | 0.983488988 |
| 1.05725899  | 8.63835531  | 1.401954093 | 0           | 0           |
| 0           | 8.118413117 | 4.061488134 | 1.911451588 | 0           |
| 0.057570943 | 0.057543936 | 1.181755698 | 1.791918571 | 0.039573509 |
| 3.37199149  | 0.208116823 | 1.59815085  | 1.566132022 | 0.130267081 |
| 4.59542224  | 4.469860835 | 3.179713565 | 4.653068708 | 0.001441451 |
| 0.377710801 | 5.5168803   | 0.334147385 | 0.252858752 | 0.214914958 |
| 2.852001535 | 1.621939167 | 1.622600073 | 0.007506735 | 0.006742287 |
| 3.450241894 | 3.090863715 | 2.610219653 | 1.83292069  | 0.19502101  |
| 1.642471192 | 0.014845765 | 2.063387243 | 2.059961679 | 2.057147351 |
| 1.37461783  | 1.768403022 | 4.474415295 | 0.828407191 | 0           |
| 1.922776429 | 10.89766532 | 3.203636013 | 2.342068933 | 0.062841648 |
| 11.80680234 | 5.496176419 | 0           | 0.92858475  | 1.502242938 |
| 0.858536241 | 2.947218191 | 2.116385986 | 1.812303611 | 0           |
| 1.149281061 | 11.2569363  | 1.769270854 | 1.760417942 | 1.144120234 |
| 0           | 3.294179837 | 4.363942288 | 0.981950286 | 1.564217364 |
| 0.871773785 | 0           | 3.119786381 | 0.869927006 | 3.406663731 |
| 1.214848809 | 7.589953525 | 1.848719387 | 1.213946639 | 1.20607579  |
| 1.659957283 | 9.174038213 | 0.216066883 | 0.169878928 | 2.25820981  |
| 0.154670614 | 2.117352025 | 3.421511803 | 0.114081869 | 0.099930918 |
| 0           | 10.44962638 | 2.937554606 | 0.680034128 | 2.858345169 |
| 0.748860784 | 3.961057666 | 2.600443792 | 2.790339062 | 0           |
| 2.344541848 | 0           | 1.571759079 | 0           | 0           |
| 0.03172632  | 0.03171226  | 1.101983754 | 0.024808113 | 0.022188862 |
| 0           | 3.120459783 | 2.537876285 | 2.540877302 | 0           |
| 0.001495747 | 3.914486681 | 2.006483122 | 2.32829688  | 0.00106799  |
| 2.61475428  | 5.46469584  | 1.219584235 | 3.086639268 | 1.821927884 |
| 0.887200226 | 10.54472397 | 4.67332714  | 0           | 2.654939965 |
| 0           | 8.284513987 | 2.007997796 | 0.782915547 | 0           |
| 0.966541122 | 1.954898851 | 0           | 1.95660283  | 0.967151979 |
| 1.84811808  | 4.239238407 | 3.314216501 | 1.838238088 | 1.826296647 |
| 0.391021477 | 0.390704815 | 3.565568143 | 1.937373545 | 0.220933816 |
| 3.470869443 | 9.476069073 | 0.854799485 | 2.963644704 | 0           |
| 0           | 1.484037701 | 4.116719542 | 1.485553972 | 0           |
| 1.815913432 | 5.813168537 | 1.414063836 | 1.821272304 | 1.424865092 |
| 0.429113992 | 1.429920681 | 3.557334039 | 0.833911113 | 0.846663872 |
| 0.026591607 | 5.134191904 | 1.688586656 | 1.684044852 | 1.08106818  |
| 1.603895137 | 2.343653043 | 1.015869811 | 1.603484544 | 0.00344931  |
| 0.028772348 | 4.047737335 | 2.714285117 | 0.022531003 | 1.08752637  |
| 2.031190264 | 8.876336548 | 2.282029563 | 1.336799776 | 0           |
| 4.609023758 | 5.935953951 | 2.730930208 | 2.266699486 | 1.146695486 |
| 1.340473366 | 4.205716442 | 3.283138041 | 1.973521824 | 1.32232545  |
| 0           | 1.554001291 | 2.050950101 | 0           | 3.60860204  |
| 0           | 3.46389975  | 1.320943295 | 2.031594505 | 0           |
| 1.545815858 | 4.330607361 | 3.152494258 | 2.502752568 | 0           |
| 5.525685756 | 8.77020892  | 4.66605664  | 1.478907975 | 0           |

|             |             |             |             |             |
|-------------|-------------|-------------|-------------|-------------|
| 0.063421251 | 1.194160354 | 1.823603505 | 2.240404739 | 0.043426685 |
| 1.095457597 | 2.92363462  | 0.604861653 | 0           | 1.775157624 |
| 5.868956278 | 6.277034095 | 3.075161825 | 1.991205328 | 0.079840016 |
| 1.244964838 | 1.939608967 | 2.532577835 | 1.759738959 | 2.172748968 |
| 1.244538817 | 5.740257755 | 3.678170033 | 1.868181229 | 1.854558932 |
| 0.037245867 | 4.707174322 | 2.975876677 | 2.145961063 | 0.025952273 |
| 2.103307664 | 0.024712256 | 4.442226821 | 1.677287175 | 0.017373235 |
| 1.87534578  | 4.653444203 | 0.999709649 | 0           | 1.673171098 |
| 3.448144471 | 2.954993473 | 3.418172119 | 2.096334864 | 0.260932434 |
| 1.9714596   | 0.108332747 | 2.757031494 | 1.953636663 | 0.072086554 |
| 1.687307292 | 11.71319706 | 5.130702294 | 2.696826681 | 0.018759425 |
| 0.100364444 | 4.624619811 | 0.092565619 | 2.965026819 | 1.28504644  |
| 1.073631592 | 2.424733653 | 2.690894414 | 0.018381498 | 0.016466225 |
| 0.24896597  | 7.848845272 | 2.392143112 | 0.176030646 | 0.152082958 |
| 1.056295971 | 8.041202191 | 3.083746753 | 3.886082923 | 1.054830063 |
| 2.765066253 | 7.49934586  | 0.970915225 | 3.281776057 | 1.552084855 |
| 1.257930401 | 9.007842754 | 1.265000753 | 2.315610535 | 1.246311926 |
| 0.642709202 | 8.358252614 | 4.177669923 | 2.892615233 | 0           |
| 0           | 4.43179818  | 2.560096982 | 0           | 0.983329139 |
| 0.100440897 | 9.68268565  | 4.611602772 | 0.075979504 | 3.949285712 |
| 0.154779228 | 4.235256774 | 2.915765076 | 1.438282493 | 0.099994413 |
| 0           | 3.203027699 | 3.021552162 | 3.165478    | 0.550431469 |
| 1.204902462 | 1.875706501 | 1.572364402 | 3.8443648   | 1.599661123 |
| 0           | 4.629156399 | 1.92881356  | 0.577039794 | 2.685769838 |
| 2.6464199   | 3.710841813 | 2.192803423 | 1.494833748 | 0.113323224 |
| 0.892520959 | 5.839468719 | 2.166691409 | 1.858420406 | 0.893835233 |
| 0.119795913 | 7.466546149 | 1.362990036 | 1.987629724 | 2.400342314 |
| 0.079437564 | 3.523373081 | 1.87955064  | 4.226644419 | 3.756188103 |
| 0.020760481 | 10.30502264 | 3.097141168 | 1.662857178 | 0.01462814  |
| 0.011911995 | 3.966522971 | 0.011136299 | 1.0380123   | 0.008444406 |
| 0           | 3.968632491 | 6.755940818 | 1.61313252  | 2.186770042 |
| 1.89362213  | 0.9214425   | 1.486014426 | 0.920530363 | 0.922626428 |
| 0           | 0           | 1.541772003 | 2.951629294 | 3.275810791 |
| 0.031068429 | 1.097242967 | 0.028959766 | 0.02430154  | 0.021738419 |
| 1.559601964 | 0           | 2.292586993 | 2.778751684 | 0           |
| 0.122622668 | 2.466691417 | 0.112711819 | 2.433404381 | 0.080821101 |
| 1.95320034  | 9.835918684 | 4.14707253  | 0.077678652 | 0.068614706 |
| 2.375197861 | 4.646140066 | 0.011197707 | 0.009457832 | 0.008490673 |
| 1.045540197 | 1.918601235 | 0           | 0.56721249  | 2.171683766 |
| 1.783174497 | 5.995451882 | 4.449507329 | 1.498512482 | 1.138013493 |
| 0.035034888 | 7.762956123 | 2.741225221 | 2.13769304  | 0.024448111 |
| 8.361339936 | 5.041953075 | 3.497961134 | 0.950216519 | 2.39850023  |
| 2.947960704 | 1.259172184 | 1.266107516 | 0.065440361 | 3.12120969  |
| 1.253116856 | 3.136729648 | 1.743071004 | 1.253803232 | 0           |
| 0.094214997 | 3.737963711 | 1.290228169 | 1.28009264  | 2.325090689 |
| 1.161620196 | 9.644456191 | 2.814007076 | 0.040588414 | 1.155844667 |
| 6.114808033 | 4.727288003 | 5.485726604 | 1.016672482 | 0.003698599 |
| 0.904049434 | 2.443038204 | 0.901356993 | 1.467798563 | 0           |
| 3.538180722 | 7.986012205 | 1.548201801 | 0.675581418 | 0           |
| 0           | 5.271650623 | 1.961254883 | 3.531237805 | 0           |
| 4.988517818 | 8.152551808 | 7.180929197 | 2.659061353 | 1.75168627  |
| 1.801662432 | 9.51870993  | 4.269184363 | 1.79420613  | 1.172161011 |
| 0           | 4.003525815 | 1.9291381   | 0.94759983  | 0           |
| 0.979033924 | 1.559157116 | 1.558680096 | 0           | 3.293953134 |
| 5.825147192 | 10.50542802 | 3.834603664 | 1.459187122 | 2.668765094 |
| 1.886231362 | 3.738121572 | 2.83721317  | 2.150319111 | 1.223861597 |
| 5.962256083 | 9.40674974  | 3.189187544 | 2.48898016  | 1.124768056 |
| 3.149341754 | 8.143857645 | 2.295862028 | 2.311231274 | 0.809970587 |

| hsa-miR-6502-5p | hsa-miR-301b-3p | hsa-miR-10a-3p | hsa-miR-196a-5p | hsa-miR-520a-3p |
|-----------------|-----------------|----------------|-----------------|-----------------|
| 2.677149211     | 1.343994105     | 2.764138454    | 1.339202623     | 1.337318144     |
| 0.04137516      | 1.227581593     | 1.853890985    | 0.072525325     | 0.072939423     |
| 1.699326702     | 1.111862302     | 3.156214209    | 3.487410707     | 0.034866533     |
| 0.010773043     | 2.076046929     | 1.655408058    | 2.076549124     | 1.057230874     |
| 3.192883999     | 1.370514174     | 3.296862303    | 1.365619784     | 0.122965343     |
| 1.142435413     | 1.161432998     | 2.535133975    | 1.777105658     | 1.157657009     |
| 1.413131735     | 1.487934469     | 1.486771527    | 3.241087185     | 1.480400436     |
| 1.062628509     | 3.422615402     | 2.905109963    | 1.06877294      | 1.068423078     |
| 0.933618899     | 2.893494825     | 2.481952621    | 2.220305619     | 0.928882158     |
| 0.02778346      | 7.523928029     | 0.041841405    | 9.21620212      | 1.148595675     |
| 1.775722766     | 2.773928399     | 1.416390688    | 9.109232584     | 0               |
| 0.117465998     | 0.199142241     | 3.139158649    | 1.659997947     | 0.23647491      |
| 0.061799703     | 1.986623221     | 3.261443396    | 0.11206202      | 0.11275485      |
| 1.979668822     | 3.432546807     | 1.562856834    | 10.27858692     | 0               |
| 0.101870227     | 2.244440892     | 0.167196084    | 3.961952497     | 0.199358616     |
| 0.025021731     | 2.504175267     | 1.748095939    | 1.134374825     | 1.747433574     |
| 1.445434679     | 2.856645013     | 3.505178738    | 7.710508463     | 1.392872253     |
| 2.327079822     | 1.73151962      | 4.002341143    | 0.372153908     | 5.530848295     |
| 1.221707488     | 0.071767483     | 2.653012482    | 2.325900724     | 4.703456048     |
| 0.126092227     | 3.478553533     | 0.21300759     | 0.255882541     | 0.257909322     |
| 0.094922846     | 1.531227012     | 1.529871392    | 2.208150626     | 0.183470775     |
| 0.145114679     | 1.826379305     | 0.250816139    | 0.305015338     | 2.54455266      |
| 0.016858782     | 1.092036191     | 2.11832759     | 1.694918391     | 1.69443225      |
| 0.080997066     | 3.170041487     | 3.395946362    | 1.446296721     | 7.388794846     |
| 0.080312832     | 2.552681303     | 4.055754185    | 2.910582325     | 2.563522228     |
| 0.713628067     | 1.880076841     | 2.342849223    | 0.700609455     | 0               |
| 0               | 1.972422362     | 0.97896006     | 0               | 1.972427389     |
| 0.035992029     | 2.251438634     | 2.850114942    | 2.588034832     | 0.062886592     |
| 0.048838395     | 1.269261071     | 3.691290754    | 1.264999431     | 0.087175372     |
| 1.716187951     | 0.035659928     | 1.128688184    | 1.126401705     | 1.125744824     |
| 0.516486541     | 1.557722312     | 3.366545696    | 3.544975513     | 0.506704203     |
| 0               | 2.321519295     | 2.806930469    | 0               | 0               |
| 0.563051578     | 1.635834175     | 3.534696367    | 6.814767828     | 2.554617488     |
| 0.776468091     | 3.321895373     | 3.209496112    | 0.764489862     | 1.291215644     |
| 0.054924211     | 3.411157232     | 0.085328617    | 1.298850772     | 0.099047884     |
| 0.139211185     | 1.791090309     | 1.788216398    | 0.289406395     | 5.195560187     |
| 1.96308419      | 2.487712985     | 2.042160701    | 1.387370641     | 0.130900943     |
| 0               | 1.7511338       | 2.061881356    | 7.680178166     | 0               |
| 1.230054568     | 2.666902048     | 1.896107283    | 1.259930566     | 1.258519104     |
| 1.657973436     | 2.091521575     | 3.099638086    | 4.69520506      | 0.021841823     |
| 1.892497741     | 4.017654805     | 2.727355188    | 1.309424867     | 0.102791332     |
| 1.795470381     | 1.210343928     | 2.266227008    | 1.83471226      | 0.067134099     |
| 1.335147052     | 3.325165349     | 1.39024245     | 1.386090654     | 2.494427825     |
| 0.034701455     | 2.573382157     | 3.066821297    | 4.457607947     | 4.875457987     |
| 2.246905354     | 2.714191065     | 3.075142718    | 1.506746715     | 0               |
| 0.931107329     | 3.209560716     | 2.217741225    | 0               | 3.342870868     |
| 1.41613904      | 0.1440111       | 2.153499586    | 2.16245919      | 1.484183245     |
| 0.10185927      | 2.244370485     | 0.167175932    | 0.197905105     | 0.199333252     |
| 0.063891584     | 2.000111377     | 1.353276041    | 2.791391827     | 1.34716289      |
| 1.436730725     | 2.797502213     | 2.131591784    | 1.41887762      | 0               |
| 1.594184114     | 0.002394001     | 2.597191584    | 0.002667735     | 2.597434872     |
| 1.191833051     | 3.24654945      | 2.46391134     | 2.064858302     | 0               |
| 0.031617252     | 0.0483277       | 1.790833271    | 2.555971279     | 0.054846508     |
| 2.399196237     | 1.668458158     | 2.904183644    | 1.66810066      | 0.021444327     |
| 2.051249064     | 3.527412424     | 1.641324331    | 2.061246934     | 1.045729658     |
| 0.787184163     | 5.330881442     | 0              | 1.690234282     | 10.7974773      |

|             |             |             |             |             |
|-------------|-------------|-------------|-------------|-------------|
| 1.490087544 | 2.661312365 | 3.322102779 | 0.602193243 | 0           |
| 0           | 2.390245313 | 2.133028169 | 0           | 1.420804143 |
| 0.722465902 | 1.214094951 | 2.991089567 | 2.140709043 | 1.596911635 |
| 0           | 3.456956338 | 0.666581885 | 1.544396577 | 0           |
| 1.101459031 | 1.114311676 | 2.146521904 | 1.112121902 | 2.476727965 |
| 0.847055069 | 0.833516594 | 4.133644389 | 1.777508791 | 0           |
| 1.921296242 | 1.187332006 | 2.955380806 | 0.689321606 | 0           |
| 0.005536413 | 2.626747011 | 3.213042789 | 1.62108089  | 0.009207804 |
| 0.976560766 | 0.974048464 | 4.604950937 | 1.965868655 | 0           |
| 1.184793341 | 1.21074803  | 2.26672465  | 2.876397147 | 0.067269647 |
| 0.035719133 | 1.196126346 | 3.074244676 | 1.192693982 | 1.191669591 |
| 1.56967075  | 0.985461782 | 3.148910371 | 1.980902354 | 0.985841336 |
| 1.566727387 | 2.298288094 | 1.564018908 | 1.977234344 | 4.830362342 |
| 2.415233191 | 1.691582059 | 2.48351642  | 0.583889657 | 0           |
| 1.510634641 | 1.50003995  | 1.500182538 | 3.064492678 | 0           |
| 1.159613116 | 0.050613137 | 0.050082336 | 2.233861321 | 0.057478797 |
| 1.495169999 | 2.721009291 | 2.264799883 | 2.743139302 | 0.207804822 |
| 2.329440721 | 1.006634093 | 1.592963242 | 3.817579373 | 7.510593624 |
| 1.7774123   | 2.6800062   | 1.969556786 | 1.983424027 | 0.376685931 |
| 0.005699486 | 3.214510722 | 2.040209772 | 0.00943469  | 0.009481475 |
| 2.363544001 | 0.274826104 | 2.579018574 | 2.615984256 | 2.61126102  |
| 0.008869958 | 2.062665856 | 1.048264177 | 2.388068598 | 0.014830494 |
| 0           | 0           | 0.826103635 | 1.767317103 | 0           |
| 1.249517439 | 1.287332325 | 2.360168526 | 3.208725027 | 5.434508692 |
| 0           | 4.28174527  | 0           | 0.928951401 | 0           |
| 0.86648528  | 2.1185634   | 2.376506951 | 2.590652606 | 0           |
| 0.027963962 | 0.042560562 | 4.124941866 | 7.862305023 | 3.812740633 |
| 1.56559289  | 3.432378816 | 2.296898931 | 4.92481491  | 0           |
| 0.879187605 | 0.867952439 | 3.260761398 | 8.123545869 | 1.425555524 |
| 1.19282969  | 4.311333794 | 2.278320094 | 0.070041412 | 1.215279238 |
| 0.11837791  | 1.667801983 | 1.665728043 | 0.236888051 | 1.661490709 |
| 0.081745472 | 0.132656076 | 2.559733986 | 0.153347299 | 1.448015017 |
| 0.698017664 | 4.112913459 | 2.316379792 | 1.855190046 | 0.686196028 |
| 0.75970196  | 1.952778316 | 2.420130552 | 2.763809454 | 0           |
| 0           | 3.143096782 | 0           | 0.514766131 | 2.840180953 |
| 0.018651202 | 0.028079199 | 2.457754068 | 1.099901482 | 1.706068781 |
| 0           | 0.966961152 | 4.904470781 | 0.967673177 | 0           |
| 1.590109838 | 3.177031632 | 3.914129871 | 1.004812247 | 3.17724175  |
| 1.191809243 | 2.609788182 | 3.471639009 | 1.21525487  | 0.07003556  |
| 0           | 2.160678607 | 0.883904232 | 0           | 2.159964468 |
| 0           | 4.110586218 | 3.824437828 | 0.785418165 | 0           |
| 1.961550491 | 3.53394377  | 3.119941682 | 0.966316896 | 0           |
| 1.195379198 | 3.632489791 | 1.222850807 | 2.893134762 | 0.071449396 |
| 0.173939931 | 2.708718605 | 0.311353065 | 0.38626231  | 2.746274491 |
| 1.427178419 | 0.854519766 | 0           | 0           | 0.858504252 |
| 0           | 0.916007864 | 2.877764528 | 1.483493104 | 0           |
| 2.157369793 | 2.128260307 | 2.795255268 | 2.95724528  | 0           |
| 0           | 3.329709814 | 3.578614607 | 10.94631552 | 0.428419468 |
| 0.015707281 | 0.02356618  | 3.581972136 | 7.439961427 | 0.026551864 |
| 0.002919371 | 2.829793237 | 3.482475071 | 1.015540423 | 0.00483518  |
| 1.082410029 | 2.936355872 | 3.129805363 | 2.714885471 | 1.69509583  |
| 2.072503916 | 3.58480587  | 3.381678143 | 1.333809329 | 4.824925533 |
| 1.16785126  | 5.059452726 | 2.594131853 | 0.644372305 | 8.226133743 |
| 0.062823413 | 1.993224533 | 2.43290808  | 1.995584169 | 0.114822939 |
| 0.38270112  | 2.992389591 | 4.813918689 | 1.550319419 | 0           |
| 2.732040353 | 2.490776294 | 2.99619002  | 0.791768763 | 0           |
| 0           | 2.085247647 | 3.625712572 | 1.173184618 | 0.675382432 |
| 0.918500563 | 2.678017483 | 0           | 2.456024076 | 4.610217255 |

|             |             |             |             |             |
|-------------|-------------|-------------|-------------|-------------|
| 0.03622526  | 3.865203253 | 2.851794432 | 7.768731092 | 0.06331847  |
| 0           | 4.136534409 | 3.919139323 | 0.612829914 | 0           |
| 0.065758026 | 1.364501429 | 1.363800536 | 2.463461093 | 5.755745982 |
| 0           | 1.5065906   | 2.115815136 | 4.664785452 | 0.477420555 |
| 1.218500221 | 1.881171298 | 0.069880774 | 1.881766833 | 10.84607151 |
| 2.127653692 | 2.480881127 | 3.754605199 | 2.154431551 | 0.037188844 |
| 1.071143112 | 2.103092456 | 1.680542773 | 0.024560045 | 1.077831095 |
| 1.043821896 | 2.924909781 | 1.35138036  | 11.52979834 | 0.551623672 |
| 0.203055709 | 2.18159185  | 2.888868859 | 0.477735004 | 5.045778623 |
| 1.284469264 | 1.971988959 | 1.970750916 | 0.107537726 | 0.108196755 |
| 0.015788232 | 0.023689866 | 0.023455722 | 1.687937125 | 3.125110565 |
| 1.885712698 | 2.991132913 | 3.585650374 | 0.099588237 | 0.10018907  |
| 0.013869845 | 1.675798097 | 2.688634543 | 4.286470438 | 0.023376666 |
| 0.122299402 | 0.208580315 | 1.688650893 | 1.689056154 | 0.248402976 |
| 0.010617513 | 0.01583587  | 1.654393396 | 1.056688313 | 8.201333822 |
| 0           | 0.970896635 | 0.970916218 | 2.764907547 | 4.538722773 |
| 1.2300006   | 2.93706665  | 2.331976195 | 2.675123468 | 0.085390128 |
| 1.545404507 | 2.865608225 | 2.587571786 | 1.129616217 | 5.454598117 |
| 2.564729497 | 2.782459056 | 3.559266058 | 1.977013816 | 0.982964347 |
| 1.26582251  | 2.385254899 | 2.989406853 | 3.903780491 | 1.946091053 |
| 1.387461122 | 0.132745603 | 1.454741231 | 0.153454728 | 1.448301299 |
| 0.564768677 | 2.929670467 | 1.639699325 | 1.876613041 | 0           |
| 0           | 0.689390306 | 1.575028844 | 4.224048404 | 0           |
| 0           | 2.321711091 | 4.360952977 | 8.258381231 | 0           |
| 0.09228684  | 4.271348318 | 2.18047613  | 2.649892105 | 0.177542788 |
| 2.192016312 | 0           | 1.853475754 | 1.853084433 | 1.451582215 |
| 0.065164145 | 2.450548457 | 0.102444966 | 0.118834233 | 0.11957858  |
| 1.215014987 | 4.152721183 | 3.13960099  | 7.390672759 | 0.079304463 |
| 0.012329875 | 1.06722007  | 2.086718399 | 0.020624851 | 0.020729866 |
| 1.034792715 | 0.010597188 | 2.638538029 | 3.05692121  | 0.011894789 |
| 0.728448446 | 0.708651429 | 3.441699759 | 3.832656513 | 1.22857433  |
| 0           | 2.882000246 | 2.2107572   | 1.487345053 | 0           |
| 0           | 1.953529117 | 4.034617504 | 0           | 0           |
| 0.018275567 | 2.128589608 | 0.027227462 | 1.097874566 | 2.949804131 |
| 0.980855967 | 1.559267749 | 2.293062853 | 0           | 0.979347069 |
| 0.066543672 | 1.368949657 | 1.368234282 | 2.468973458 | 0.122399014 |
| 0.056731956 | 1.313562567 | 2.726759977 | 0.102002886 | 9.949853149 |
| 0.007172831 | 2.639036087 | 2.050568985 | 0.011901134 | 0.011960498 |
| 0           | 2.610069713 | 3.584423717 | 2.297993901 | 0           |
| 0.651056639 | 3.388084713 | 2.235794428 | 2.411039692 | 8.412367546 |
| 0.020533402 | 2.144338751 | 1.112100289 | 0.034798469 | 8.774322781 |
| 1.349823739 | 3.702023663 | 2.339645752 | 9.027470736 | 7.262040283 |
| 0.048108815 | 3.534162579 | 1.897297631 | 4.922535838 | 1.2595373   |
| 0.491784335 | 2.553541915 | 3.583884337 | 0.915630062 | 0           |
| 0.052378545 | 1.289101591 | 0.081135003 | 0.093495103 | 1.283109053 |
| 1.146209396 | 1.782467973 | 3.034216026 | 1.162793781 | 7.498385095 |
| 2.018740017 | 1.605506196 | 1.605465289 | 1.60538432  | 11.69245796 |
| 0.909981805 | 2.855196885 | 2.44498532  | 2.851815815 | 0           |
| 1.90862005  | 1.550194014 | 3.280461218 | 1.553124507 | 5.615358123 |
| 1.7012544   | 1.659400427 | 3.069508393 | 0           | 0.755958585 |
| 0.916166908 | 3.399601649 | 0.443913044 | 1.212267865 | 1.214868504 |
| 0.033427082 | 4.067819345 | 1.183172147 | 2.236469277 | 7.966399857 |
| 0.951657271 | 1.520134004 | 2.24891262  | 0           | 0           |
| 0           | 4.874344423 | 2.776753002 | 9.808798778 | 1.559127677 |
| 1.47114046  | 1.455555472 | 2.434632693 | 0           | 10.35090211 |
| 0.716481602 | 2.696625396 | 4.96217226  | 10.07873551 | 3.737910644 |
| 0.024198114 | 3.997408345 | 0.036293783 | 0.041250605 | 10.87210197 |
| 0.818435822 | 1.34216225  | 2.872654253 | 0           | 6.720595485 |



| hsa-miR-519a-5p | hsa-miR-502-5p | hsa-miR-520c-3p | hsa-miR-520b-3p | hsa-miR-34a-3p |
|-----------------|----------------|-----------------|-----------------|----------------|
| 1.337673112     | 3.46986842     | 0.109302592     | 0.109299642     | 2.427536851    |
| 0.072871921     | 2.29102329     | 0.070488407     | 0.070486646     | 0.063018292    |
| 1.109253187     | 2.472763713    | 0.033784467     | 0.033783688     | 2.14324719     |
| 1.057285054     | 3.787060657    | 0.017527126     | 0.017526737     | 3.25329164     |
| 0.122839707     | 2.466620643    | 0.118419774     | 0.118416521     | 2.459030115    |
| 0.050874301     | 2.538069924    | 0.04928381      | 0.049282634     | 2.534800308    |
| 0.166523943     | 2.156808476    | 0.160057338     | 0.160052594     | 3.209465263    |
| 0.021637866     | 2.682570311    | 0.02100305      | 0.02100258      | 2.904943827    |
| 0.928818755     | 3.21247576     | 0               | 0               | 2.702707229    |
| 1.148741786     | 3.678167382    | 0.046365884     | 0.046364784     | 1.765817787    |
| 1.06655188      | 3.20175442     | 0               | 0               | 2.155325593    |
| 0.236181271     | 3.434348997    | 0.225939607     | 0.225932132     | 1.659571947    |
| 0.112641866     | 1.989732934    | 0.108663992     | 0.108661063     | 3.629771242    |
| 0.982176866     | 3.294865354    | 0               | 0               | 2.297086104    |
| 0.199125462     | 4.225318257    | 0.190970142     | 0.190964174     | 1.569255127    |
| 0.042902516     | 2.505911251    | 0.041583745     | 0.041582769     | 3.36126536     |
| 2.293482628     | 2.850857945    | 0               | 0               | 2.119573115    |
| 2.966861664     | 1.537353548    | 2.180719667     | 2.0447336       | 1.903800056    |
| 4.842210557     | 1.887605651    | 1.253624816     | 1.253626624     | 2.319521966    |
| 0.257578279     | 1.718659988    | 0.246051191     | 0.246042791     | 0.211833232    |
| 1.524316855     | 2.658645042    | 0.175945442     | 0.175940082     | 2.196317705    |
| 0.307189913     | 1.833795447    | 0.292455507     | 0.292444811     | 3.319799515    |
| 2.71381469      | 2.119569884    | 0.027677405     | 0.027676776     | 3.299712403    |
| 7.569419923     | 3.408486163    | 4.224989178     | 4.224982553     | 2.553734548    |
| 0.151124014     | 3.403596099    | 0.145407204     | 0.145403005     | 3.760345062    |
| 0               | 1.20173545     | 0               | 0               | 1.202778881    |
| 0.979478036     | 3.553463815    | 0               | 0               | 1.559521327    |
| 0.062829607     | 3.276467482    | 0.060815988     | 0.0608145       | 2.250206183    |
| 0.08709231      | 2.342742865    | 0.084162433     | 0.084160271     | 1.901614283    |
| 0.040285217     | 1.739764772    | 0.039053838     | 0.039052926     | 2.492696103    |
| 0.950344596     | 0.49369554     | 0               | 0               | 3.126338355    |
| 0.999707055     | 2.999564141    | 0.999701835     | 0.999701833     | 2.999571388    |
| 1.011818411     | 3.119593867    | 0.545337959     | 0.545334663     | 3.386806685    |
| 2.793501053     | 2.444195738    | 0.761446107     | 0.761444279     | 3.52819107     |
| 0.098951248     | 4.235168236    | 0.095545531     | 0.09554302      | 0.084952716    |
| 3.623601391     | 3.817684759    | 2.98465216      | 2.984647464     | 1.787052541    |
| 0.130765196     | 2.831624488    | 0.125992357     | 0.125988847     | 2.821917583    |
| 0               | 4.790120436    | 0               | 0               | 3.620487761    |
| 0.085331097     | 2.941449223    | 0.082470321     | 0.08246821      | 3.16183836     |
| 0.02182375      | 3.272073004    | 0.021183214     | 0.021182739     | 3.560721735    |
| 0.102690303     | 2.39783265     | 0.09913075      | 0.099128127     | 4.013954052    |
| 0.067072718     | 3.09785393     | 1.20961851      | 1.20962003      | 1.209924975    |
| 0.130296838     | 2.491436273    | 1.391458643     | 1.391461246     | 3.092653759    |
| 5.502931664     | 3.438824733    | 0.058520376     | 0.05851895      | 2.241364544    |
| 0               | 4.070432164    | 0               | 0               | 2.233117685    |
| 3.342825062     | 1.899349489    | 0               | 0               | 1.492844753    |
| 2.160318314     | 2.161109569    | 1.493680446     | 1.493683507     | 3.443354501    |
| 2.715322946     | 2.251237131    | 0.190946183     | 0.190940216     | 1.569191992    |
| 0.11687029      | 1.355285233    | 0.112710765     | 0.112707703     | 3.79883232     |
| 0               | 2.795610286    | 0               | 0               | 1.81809243     |
| 2.011515434     | 3.182805311    | 0.002603395     | 0.002603339     | 2.597173467    |
| 0               | 3.136585331    | 0               | 0               | 2.628292163    |
| 0.054797655     | 1.792586073    | 0.053070373     | 0.053069095     | 2.220199054    |
| 0.021426598     | 2.681643605    | 0.02079828      | 0.020797814     | 2.414945049    |
| 0.014386918     | 3.237963302    | 0.013971713     | 0.013971405     | 2.872899495    |
| 10.80687964     | 3.09948602     | 8.742876552     | 8.724764775     | 1.996858312    |

|             |             |             |             |             |
|-------------|-------------|-------------|-------------|-------------|
| 0.603486566 | 1.430446595 | 0           | 0           | 2.79669384  |
| 1.819531351 | 3.115357785 | 0.865379509 | 0.865378471 | 2.968117014 |
| 0.710555233 | 2.851019226 | 0           | 0           | 2.358273258 |
| 0           | 1.836786923 | 0           | 0           | 2.299490951 |
| 1.720872306 | 2.476011706 | 0.034542574 | 0.034541776 | 2.473801828 |
| 0           | 2.749901262 | 0           | 0           | 0.833600401 |
| 0           | 3.289311339 | 0           | 0           | 3.078896465 |
| 0.009200407 | 1.621443481 | 0.008938033 | 0.008937838 | 2.362511193 |
| 0           | 2.286192796 | 0           | 0           | 1.553588727 |
| 0.067208125 | 3.294144575 | 0.065034852 | 0.065033247 | 1.83408991  |
| 2.251823574 | 3.274419224 | 0.060329828 | 0.060328353 | 0.054056904 |
| 0           | 2.564444704 | 0           | 0           | 1.56740675  |
| 5.557050537 | 3.1444706   | 3.880074241 | 3.880074424 | 2.975194635 |
| 1.410772753 | 3.790263678 | 1.048984415 | 1.048981269 | 1.693008116 |
| 0           | 1.499742842 | 0           | 0           | 2.226267846 |
| 0.057427309 | 2.233131537 | 0.055607212 | 0.055605866 | 2.230081854 |
| 0.207558381 | 3.582157931 | 0.198943857 | 0.198937556 | 2.715824977 |
| 6.098143059 | 0.001847955 | 2.816995765 | 3.009781701 | 2.816698458 |
| 0.376114369 | 1.984474179 | 0.356398836 | 0.3563846   | 1.967816091 |
| 0.009473854 | 5.506485288 | 0.00920351  | 0.00920331  | 1.622242237 |
| 1.88474053  | 0.286812934 | 0.317073098 | 0.31706109  | 2.57680852  |
| 0.014818421 | 2.387682818 | 0.014390341 | 0.014390023 | 3.23867796  |
| 0.830704403 | 2.076346286 | 0           | 0           | 3.319601287 |
| 3.735909105 | 2.365031426 | 1.286867364 | 1.286869379 | 2.359610081 |
| 0           | 3.590038962 | 0.927989779 | 0.927989225 | 2.894703624 |
| 0           | 2.374279541 | 0           | 0           | 2.376765339 |
| 1.149719247 | 1.153487654 | 1.76913271  | 1.152458386 | 1.152912518 |
| 0.982065992 | 3.557453219 | 0           | 0           | 3.557981356 |
| 0           | 3.881700072 | 0           | 0           | 1.824741292 |
| 0.070374401 | 0.063663041 | 0.068084113 | 0.068082421 | 2.277918299 |
| 3.185340248 | 0.208711012 | 2.37110601  | 2.371105946 | 0.197072795 |
| 1.448502881 | 3.183778336 | 0.148340014 | 0.148335708 | 3.597060863 |
| 1.560759016 | 2.941110429 | 0           | 0           | 1.85656588  |
| 0           | 1.647161842 | 0           | 0           | 2.773478362 |
| 6.815683914 | 4.536786537 | 0.509212727 | 0.509209224 | 2.014636533 |
| 1.706172    | 2.459498941 | 1.101289416 | 1.101290176 | 2.130638781 |
| 0.967801747 | 1.544735401 | 0           | 0           | 1.544992179 |
| 1.00479281  | 3.177113877 | 1.004878307 | 1.004878344 | 2.006390292 |
| 0.069971136 | 3.305205202 | 0.067695824 | 0.067694144 | 2.276448492 |
| 2.993185584 | 3.282671887 | 0           | 0           | 2.161311438 |
| 0           | 2.478104949 | 0           | 0           | 0           |
| 0           | 3.119166296 | 0           | 0           | 2.275024284 |
| 0.071383478 | 1.851218272 | 0.069055622 | 0.069053902 | 4.483252524 |
| 0.389340108 | 3.544793555 | 2.023768894 | 2.023771622 | 3.161891609 |
| 0           | 2.117566972 | 0           | 0           | 1.406902133 |
| 0           | 2.464922409 | 0           | 0           | 3.197945572 |
| 0           | 3.691013497 | 0           | 0           | 2.386728221 |
| 0.428061551 | 3.252617387 | 0.420286863 | 0.420282922 | 2.441909256 |
| 1.08368316  | 3.584262569 | 0.025742768 | 0.025742185 | 2.110166651 |
| 0.004831337 | 2.020816668 | 0.004694952 | 0.004694851 | 3.022562288 |
| 2.119987853 | 3.131964842 | 0.027849458 | 0.027848824 | 2.118891518 |
| 3.134012617 | 3.003581641 | 2.683875971 | 2.68387638  | 3.488106085 |
| 8.514050204 | 3.394516488 | 7.454750519 | 7.44948408  | 3.920591714 |
| 0.114707425 | 4.069352322 | 0.110641107 | 0.110638113 | 1.991347847 |
| 0           | 3.05840607  | 0           | 0           | 1.908925792 |
| 0           | 2.272428158 | 0           | 0           | 2.847169428 |
| 0           | 3.903404201 | 0           | 0           | 1.839370796 |
| 4.027483491 | 2.676837882 | 1.475627531 | 1.475626991 | 1.476015552 |

|             |             |             |             |             |
|-------------|-------------|-------------|-------------|-------------|
| 0.063261041 | 2.586901538 | 0.061231803 | 0.061230303 | 4.18665776  |
| 0           | 3.04190357  | 0           | 0           | 3.587415179 |
| 4.337958863 | 1.365920202 | 2.806100699 | 2.806099409 | 2.451906156 |
| 0           | 0.463831254 | 0           | 0           | 2.274093788 |
| 11.12381675 | 4.056192192 | 7.71860494  | 7.727477017 | 2.917414128 |
| 0.037156978 | 2.1542327   | 0.036028869 | 0.036028034 | 2.152372727 |
| 0.024665684 | 1.079924551 | 0.023937115 | 0.023936575 | 1.680455125 |
| 0           | 2.25303214  | 0           | 0           | 2.564642577 |
| 2.200089962 | 2.197790311 | 2.218278318 | 2.218279344 | 0.374097914 |
| 0.108089288 | 2.416519812 | 0.104304387 | 0.104301599 | 3.244452709 |
| 2.930625447 | 3.293930455 | 0.025878558 | 0.025877971 | 1.687995917 |
| 0.100091101 | 2.388767482 | 0.09663868  | 0.096636135 | 3.877720154 |
| 0.023357254 | 3.279020613 | 0.022669347 | 0.022668837 | 2.097361975 |
| 0.248088747 | 2.844584031 | 0.237139026 | 0.237131042 | 1.687749068 |
| 7.840915815 | 3.544163383 | 5.614098628 | 5.614097507 | 2.888007452 |
| 1.550056687 | 1.961603664 | 0           | 0           | 0.970925418 |
| 0.085309061 | 2.336337244 | 0.082449147 | 0.082447037 | 1.895661652 |
| 4.674602948 | 4.077963522 | 2.414049291 | 2.575585135 | 2.588263966 |
| 0           | 4.221350354 | 0           | 0           | 2.78259531  |
| 1.300945324 | 4.683317895 | 0.096711755 | 0.096709207 | 4.004723257 |
| 0.154312533 | 2.569144421 | 0.148443006 | 0.148438696 | 2.897793121 |
| 0           | 4.440833726 | 0           | 0           | 2.821585785 |
| 0           | 1.872017726 | 0           | 0           | 2.687218894 |
| 0           | 1.93063421  | 0           | 0           | 2.763322263 |
| 1.509058801 | 2.982758932 | 0.170330921 | 0.170325781 | 2.628654697 |
| 0           | 2.167402315 | 0.890374157 | 0.890373312 | 2.838211959 |
| 0.119457186 | 2.455252437 | 0.115185381 | 0.115182236 | 2.784196063 |
| 0.079230101 | 2.314329962 | 0.076605567 | 0.076603629 | 3.138944367 |
| 1.065602903 | 2.087596668 | 0.020106346 | 0.020105897 | 3.555721702 |
| 0.011885173 | 1.631958201 | 0.011544129 | 0.011543876 | 1.631608804 |
| 1.228307373 | 2.99579607  | 0           | 0           | 3.344283873 |
| 0           | 4.045397407 | 0           | 0           | 2.882646051 |
| 0           | 2.273099604 | 0           | 0           | 1.953697194 |
| 1.097464946 | 2.723123252 | 1.099234079 | 1.099234823 | 3.139463224 |
| 0           | 1.972048776 | 0           | 0           | 2.969609814 |
| 1.362407859 | 4.422064655 | 0.117879031 | 0.117875796 | 2.015166825 |
| 9.859283557 | 1.956666226 | 7.141143759 | 7.1691617   | 2.996988043 |
| 0.011950827 | 2.051059996 | 0.011607848 | 0.011607594 | 4.580947375 |
| 0           | 2.968606885 | 0           | 0           | 2.125413327 |
| 8.281551379 | 1.484670425 | 6.753029795 | 6.769897649 | 2.419948737 |
| 6.480851341 | 3.330634303 | 7.093226785 | 7.128562505 | 2.471075359 |
| 5.731023386 | 2.475402557 | 5.575934957 | 5.575943147 | 1.800845286 |
| 1.2598033   | 2.337695492 | 0.082811964 | 0.082809842 | 1.896923756 |
| 0           | 2.547674084 | 0.474910032 | 0.474906348 | 2.786485504 |
| 0.093961501 | 1.290023683 | 0.090758235 | 0.090755872 | 3.389784248 |
| 5.649443694 | 3.233208985 | 3.042598506 | 3.042597658 | 0.045494432 |
| 11.83651441 | 2.022317184 | 9.224212974 | 9.219288727 | 2.344907175 |
| 1.465908136 | 3.549388778 | 0.90212568  | 0.902124926 | 1.869567477 |
| 2.794956498 | 2.488899951 | 2.30068993  | 2.300689686 | 2.097627494 |
| 0           | 2.615356933 | 0           | 0           | 2.217802625 |
| 2.611327077 | 2.725633654 | 1.473719119 | 1.473715974 | 1.904432939 |
| 8.617921726 | 3.429174549 | 3.97212033  | 3.97211816  | 3.252129948 |
| 0           | 1.929393919 | 0           | 0           | 2.249002296 |
| 0           | 4.426525272 | 0           | 0           | 0           |
| 9.999691643 | 1.455145955 | 7.763412331 | 7.751589407 | 3.013799377 |
| 3.090274382 | 2.692794478 | 0.699747792 | 0.699745513 | 2.69876244  |
| 10.15328643 | 2.767267029 | 8.349549042 | 8.354634293 | 2.497319692 |
| 6.631291039 | 2.297274095 | 5.098869919 | 5.098873077 | 2.045351221 |

| hsa-miR-2114-5p | hsa-miR-34b-3p | hsa-miR-643 | hsa-miR-130b-3p | hsa-miR-130a-5p |
|-----------------|----------------|-------------|-----------------|-----------------|
| 0.106035449     | 1.332609974    | 0.076770677 | 6.94786283      | 2.395535476     |
| 0.06853447      | 0.0560659      | 3.44710728  | 6.305014717     | 1.837807378     |
| 6.785521501     | 2.463739148    | 1.106168161 | 6.220605377     | 1.107681407     |
| 0.01709344      | 0.014260713    | 1.650701306 | 6.047586683     | 1.651866728     |
| 1.372328622     | 0.092326477    | 0.082749388 | 4.793730392     | 1.988180093     |
| 5.372231218     | 0.039554445    | 0.035833093 | 5.74264799      | 1.154961196     |
| 2.61510615      | 0.122690171    | 1.450282691 | 5.670811748     | 1.459204396     |
| 0.020479243     | 1.66628124     | 1.066796974 | 7.52147358      | 1.067707949     |
| 1.495568759     | 1.49857991     | 0.92976325  | 6.479802742     | 1.908892448     |
| 0.04514338      | 0.037258989    | 2.177468703 | 10.01766115     | 0.035385127     |
| 0               | 0.584312331    | 1.985011007 | 7.51302031      | 2.682293237     |
| 0.217722753     | 0.168723819    | 0.148982207 | 6.659759914     | 2.277679316     |
| 3.048369546     | 0.085062225    | 0.076349625 | 7.134001631     | 1.958794893     |
| 1.562685946     | 0              | 1.564214982 | 6.413284702     | 1.977461635     |
| 0.184394558     | 1.546833452    | 0.128263132 | 6.081257477     | 0.135729629     |
| 3.902815468     | 0.033484624    | 2.160198886 | 5.705548081     | 0.031813913     |
| 0               | 4.53334236     | 1.412164641 | 6.962909386     | 1.697306557     |
| 2.044808721     | 0              | 1.088454023 | 6.050529653     | 1.769840615     |
| 1.254893396     | 0.062769246    | 1.86061816  | 6.883119113     | 2.297141123     |
| 0.236829715     | 0.182312527    | 3.084405092 | 7.538601439     | 0.170471077     |
| 7.478424975     | 2.165374199    | 0.119126162 | 6.481885427     | 1.498579312     |
| 0.280747467     | 0.212884731    | 0.18641909  | 7.555148804     | 0.198433241     |
| 7.929014052     | 1.691300904    | 0.020383385 | 6.927451624     | 0.021328153     |
| 1.45420473      | 1.43418182     | 1.417567654 | 8.904491792     | 0.106562566     |
| 1.450227349     | 2.078662229    | 1.414071769 | 6.308919199     | 2.505083935     |
| 1.57796011      | 1.209695053    | 0.70094901  | 6.560231479     | 0.698462166     |
| 1.559306612     | 1.973513504    | 2.972690042 | 6.693701814     | 2.29507377      |
| 2.255648779     | 1.192301396    | 0.043919878 | 6.087228327     | 2.233447353     |
| 3.705859098     | 0.066558147    | 1.252646152 | 6.366362192     | 0.063007023     |
| 1.128874932     | 2.157692761    | 1.727543816 | 6.22462719      | 3.335206581     |
| 2.710102313     | 2.504059149    | 0.955313035 | 5.856148388     | 2.211534178     |
| 0               | 1.999623488    | 1.999638023 | 6.208968579     | 1.999631009     |
| 1.632538405     | 3.99975537     | 1.018497256 | 3.765089795     | 3.355291724     |
| 1.285735347     | 0              | 0.765714097 | 6.985584643     | 0               |
| 1.304465528     | 1.293876769    | 0.067633087 | 5.54561113      | 1.288805647     |
| 0.266848376     | 1.749072186    | 1.71289301  | 4.797502266     | 0.189691324     |
| 5.609883461     | 0.097925237    | 0.087669428 | 6.288569975     | 0.092385205     |
| 0               | 0.81701693     | 2.337930482 | 6.241320295     | 0               |
| 8.31548345      | 0.06526627     | 1.247938769 | 6.335349307     | 1.25203292      |
| 5.318064543     | 0.017208117    | 1.664045717 | 6.134728138     | 0.016379225     |
| 5.885943695     | 0.077907119    | 1.293682781 | 8.187346271     | 0.073659187     |
| 2.604684791     | 1.204552442    | 0.046760867 | 6.434061144     | 0.049065344     |
| 5.563622004     | 2.019574513    | 1.999865816 | 7.60101361      | 1.370240336     |
| 1.190742925     | 1.185387108    | 0.04231877  | 6.128164612     | 2.225291978     |
| 1.505703424     | 0.936275097    | 1.510803565 | 5.252299849     | 1.509632562     |
| 2.215989086     | 0              | 0.927117021 | 8.178540146     | 0.926278058     |
| 0.15614067      | 1.472292793    | 1.453642843 | 7.538057185     | 2.111095101     |
| 3.061356257     | 0.144569904    | 2.94914137  | 8.426395006     | 0.135714132     |
| 0.109320309     | 0.088082553    | 0.079012738 | 9.557576147     | 0.083187821     |
| 0.863527227     | 0.865043476    | 0.867821876 | 6.443726658     | 1.423972033     |
| 2.01163406      | 1.008640422    | 1.594917023 | 6.643582054     | 2.01080412      |
| 3.018385529     | 1.160231401    | 2.316299567 | 7.52029158      | 2.307507835     |
| 4.843990345     | 1.78312346     | 0.03850039  | 6.71354059      | 0.040362498     |
| 2.417046987     | 2.085976188    | 1.066158492 | 6.754614885     | 1.664036719     |
| 6.687402891     | 0.011385486    | 3.059697317 | 7.629909054     | 1.638528508     |
| 3.43779597      | 0              | 0           | 8.917227725     | 0               |

|             |             |             |             |             |
|-------------|-------------|-------------|-------------|-------------|
| 1.071168452 | 0.595067469 | 1.458344941 | 6.852785743 | 1.993302954 |
| 3.785223162 | 0.866041193 | 1.831117418 | 6.860115411 | 1.425182914 |
| 0           | 0           | 1.921477036 | 5.76747894  | 0           |
| 0           | 0.669426975 | 2.334840493 | 7.608506077 | 1.559314331 |
| 2.744588697 | 0.027899095 | 1.711778477 | 8.032857121 | 2.137200131 |
| 3.199890209 | 0           | 0.839020933 | 6.461258749 | 0           |
| 0.683389705 | 0.684547682 | 1.20377978  | 5.817185381 | 2.703664011 |
| 4.631319099 | 0.007299559 | 1.028752721 | 7.103753825 | 1.619444004 |
| 0.974102015 | 0           | 0           | 6.24327485  | 0.974829576 |
| 2.272249449 | 0.051847598 | 2.242842316 | 6.392143769 | 1.201720894 |
| 0.05869185  | 1.190839239 | 1.799621793 | 6.697078856 | 1.187885924 |
| 3.300134738 | 0           | 0.986080447 | 5.334207634 | 2.303413434 |
| 4.365453018 | 2.97642698  | 0.9834087   | 6.398170927 | 0           |
| 1.927086216 | 0           | 1.725540037 | 5.748775775 | 2.520671112 |
| 0           | 0.931409221 | 1.914635409 | 7.142515032 | 0.932177232 |
| 7.130857939 | 0.044509379 | 1.783937275 | 5.772599466 | 0.042236949 |
| 5.634170033 | 0.15014852  | 1.542353353 | 6.220304571 | 2.210320834 |
| 0.001911829 | 1.006503898 | 1.006342672 | 6.502558122 | 0.001529822 |
| 0.340880551 | 0.253320331 | 0.22018798  | 5.516650782 | 1.888019821 |
| 3.747217814 | 0.0075155   | 1.029599251 | 5.40687591  | 2.03784147  |
| 4.488844853 | 0.228677355 | 0.199664504 | 4.364276426 | 0.212812202 |
| 0.014036814 | 1.047284074 | 1.046053074 | 5.98387399  | 1.046666331 |
| 0           | 0.828370739 | 2.763699927 | 5.54141157  | 3.214164033 |
| 1.928165483 | 0.071128358 | 1.269239732 | 6.743171781 | 2.664555986 |
| 1.496087574 | 1.499083591 | 2.49120398  | 7.524044326 | 1.50043881  |
| 3.0974534   | 2.126609381 | 1.818592448 | 6.326150566 | 2.389182746 |
| 2.199028225 | 0.037506225 | 1.14495247  | 6.699406067 | 2.182469188 |
| 1.562547146 | 0           | 1.564085475 | 6.509299897 | 0.982162087 |
| 3.119087789 | 0           | 0.87259417  | 6.084001507 | 0           |
| 1.220599632 | 0.054208577 | 0.048961104 | 9.347879076 | 2.58813668  |
| 0.219719528 | 1.636125778 | 2.706901861 | 8.651597191 | 1.621284861 |
| 4.222041689 | 1.438215994 | 0.101952748 | 6.535462889 | 2.074770752 |
| 2.936110464 | 0           | 0.684930125 | 8.775350696 | 0.682376747 |
| 6.598191221 | 0           | 1.668926644 | 6.123652229 | 2.226014387 |
| 6.941453936 | 8.626715849 | 2.55126204  | 6.229485578 | 2.392026585 |
| 7.556770751 | 0.024838273 | 0.022570074 | 5.80413077  | 0.023621698 |
| 2.95120151  | 0.967561791 | 0           | 5.406101231 | 3.277459088 |
| 2.006491083 | 2.591466883 | 1.004700131 | 6.878312557 | 1.590611549 |
| 2.282651845 | 0.05390827  | 1.823741083 | 7.373104098 | 1.828556739 |
| 1.844346862 | 0.885625584 | 2.173229617 | 7.581163806 | 1.448886899 |
| 0           | 0           | 0           | 7.837631076 | 2.027546761 |
| 3.407288129 | 0           | 1.958211918 | 8.554687762 | 1.545153903 |
| 3.315669466 | 0.054959523 | 1.210114162 | 7.908558514 | 0.052093486 |
| 0.352303351 | 0.26082361  | 0.226402614 | 5.975670011 | 1.911119853 |
| 1.804296221 | 0           | 1.818866602 | 6.601832813 | 0           |
| 3.776167003 | 1.893057189 | 0           | 5.354664023 | 1.895036366 |
| 2.600989821 | 2.614119455 | 0.865905291 | 5.576671571 | 0           |
| 1.417258233 | 2.993049165 | 0.844453459 | 7.05521102  | 2.490135207 |
| 1.688631743 | 3.816132379 | 2.42628819  | 5.993513705 | 2.103463321 |
| 1.604250347 | 0.003841413 | 1.015164443 | 5.883434229 | 3.020864959 |
| 1.696897013 | 0.022558252 | 0.020507983 | 6.100513143 | 1.689944543 |
| 3.135302409 | 1.3367233   | 1.34332802  | 9.616523586 | 1.735636341 |
| 1.12764897  | 2.054242627 | 0.643613425 | 9.08806947  | 1.514787617 |
| 0.107325688 | 0.086539109 | 0.077652233 | 7.434961251 | 1.330281341 |
| 4.541060403 | 0           | 1.787581187 | 5.471950031 | 1.774803005 |
| 0           | 1.327726682 | 0           | 7.64087386  | 2.51097909  |
| 1.538538992 | 2.816269942 | 0.673874499 | 6.486306018 | 0.671278731 |
| 1.880412424 | 0.911912451 | 2.208089817 | 7.252705816 | 2.687242472 |

|             |             |             |             |             |
|-------------|-------------|-------------|-------------|-------------|
| 3.874659832 | 0.048894448 | 1.802597596 | 7.216476534 | 1.190546814 |
| 1.976974786 | 2.841992915 | 1.102808114 | 7.576316458 | 0.608563428 |
| 4.427678815 | 0.090785384 | 1.339571904 | 5.755630747 | 1.981975722 |
| 0           | 0           | 1.781439448 | 4.578647845 | 1.77063897  |
| 0.075764638 | 4.910873893 | 1.235317166 | 7.268851034 | 0.058545005 |
| 0.03509985  | 0.029080934 | 0.026402039 | 5.941838324 | 0.02764348  |
| 5.444262167 | 0.019422057 | 0.017668367 | 6.90835445  | 0.018481943 |
| 3.365510603 | 1.00701349  | 0.546796282 | 5.110229634 | 0           |
| 0.431296723 | 0.311245472 | 2.707907444 | 6.841603819 | 0.287293999 |
| 5.689749993 | 0.081797138 | 1.307619143 | 5.6657632   | 0.077304387 |
| 1.689165453 | 0.020979672 | 2.101881345 | 6.878377479 | 1.08306318  |
| 3.428443685 | 0.076027403 | 2.346688264 | 7.678309995 | 1.291843907 |
| 0.022101855 | 1.073969908 | 2.089650669 | 5.820127608 | 2.681040255 |
| 0.228368195 | 0.176316758 | 1.627518123 | 4.666982093 | 1.641777765 |
| 0.016843032 | 0.014053164 | 2.657082965 | 7.450183849 | 1.055860424 |
| 0           | 0.971429856 | 0           | 8.428169088 | 0           |
| 1.900808671 | 0.065250093 | 1.870833065 | 6.848592555 | 3.326243354 |
| 1.122775217 | 0           | 1.515823448 | 7.489710764 | 2.270117873 |
| 1.563652164 | 2.299141573 | 0           | 6.463476725 | 1.564788225 |
| 2.729832252 | 0.076082577 | 2.945212262 | 5.319625303 | 1.921971445 |
| 5.604035331 | 2.863583231 | 0.102017772 | 5.960171084 | 2.513911553 |
| 1.353300624 | 0.543746018 | 1.917873028 | 6.401310498 | 1.01548745  |
| 2.329037365 | 1.888452539 | 0.697091289 | 6.183600685 | 1.591662502 |
| 2.133670909 | 0.576984925 | 1.064814442 | 6.353374859 | 1.963560583 |
| 6.708056507 | 1.495076917 | 1.475165494 | 8.157527856 | 2.575933349 |
| 0           | 2.434409319 | 0.893371514 | 4.773787865 | 1.455425923 |
| 2.799128689 | 1.348924853 | 1.336526588 | 5.446210857 | 0.084910523 |
| 1.24691457  | 1.863808399 | 2.281811823 | 9.381131748 | 0.057568462 |
| 2.413956124 | 1.065748228 | 1.063999195 | 7.638839196 | 2.081432313 |
| 1.038788497 | 0.00941721  | 0.008584835 | 6.570033685 | 0.00897143  |
| 1.221867128 | 0           | 2.184066016 | 6.557668287 | 0.713764665 |
| 4.194920451 | 0           | 2.219400673 | 6.608290601 | 0.921387182 |
| 1.541772313 | 0           | 0.966052833 | 6.227805499 | 0.96564227  |
| 5.676047842 | 0.02433105  | 3.448081329 | 7.524781291 | 0.023140628 |
| 2.968744139 | 0           | 0.979685043 | 6.489124812 | 1.560489062 |
| 3.083082172 | 1.356346542 | 2.412151738 | 6.643864947 | 1.986566711 |
| 5.36466224  | 0.077784391 | 1.921731897 | 6.542970052 | 2.36252087  |
| 4.583479586 | 1.03823124  | 1.628831448 | 6.454857435 | 0.009020646 |
| 1.034542647 | 1.041499976 | 1.051859175 | 6.577762562 | 0.569759772 |
| 0.631001464 | 2.887125582 | 1.511519861 | 7.055651184 | 0.634183997 |
| 2.741717904 | 0.027384183 | 2.131963775 | 6.849776936 | 0.026035519 |
| 1.561586406 | 4.064895586 | 1.841588142 | 8.006165546 | 4.305797573 |
| 3.175874611 | 1.884426754 | 1.248890339 | 7.537458299 | 1.253004026 |
| 1.513028995 | 0.910749478 | 0.475654227 | 5.651992462 | 2.325820405 |
| 2.370691232 | 0.071576483 | 0.064419941 | 6.885191917 | 1.275434852 |
| 2.21515177  | 1.774647406 | 0.036807865 | 7.270895736 | 1.159114653 |
| 2.022441118 | 4.778470692 | 2.020423886 | 5.64193383  | 3.482080666 |
| 2.442254096 | 0           | 2.196030343 | 6.790578593 | 0           |
| 1.84469926  | 0           | 0.680508094 | 6.178266724 | 3.096852219 |
| 0           | 1.280374816 | 0           | 7.082085677 | 2.237495221 |
| 4.216981889 | 0.877410489 | 2.131905249 | 7.070581926 | 1.939851721 |
| 2.237579476 | 0.045021202 | 2.212519686 | 8.959406495 | 1.790073184 |
| 3.241336455 | 2.25189347  | 0           | 6.141719937 | 0           |
| 2.292029888 | 0           | 1.973893243 | 9.521298637 | 3.877669762 |
| 0           | 0           | 1.462902424 | 6.250934801 | 1.461054842 |
| 1.582212509 | 3.992635872 | 1.222166844 | 7.330850882 | 0           |
| 0.039120207 | 0.032362069 | 1.125474673 | 9.461884416 | 1.127301231 |
| 2.511421515 | 1.347958557 | 2.064300077 | 6.864937502 | 2.31657327  |

| hsa-miR-765 | hsa-miR-939-5p | hsa-miR-1226-3p | hsa-miR-4742-3p | hsa-miR-219b-3p |
|-------------|----------------|-----------------|-----------------|-----------------|
| 1.952897284 | 0.093883578    | 1.990071902     | 2.757606223     | 1.322493799     |
| 0.050695489 | 1.851268576    | 2.891621001     | 3.631219626     | 1.215122384     |
| 1.106216317 | 1.111227965    | 1.11196261      | 3.153911608     | 2.132291185     |
| 1.05594946  | 2.075058383    | 3.670592747     | 3.404677867     | 1.056130574     |
| 0.082882124 | 2.012545852    | 0.107849745     | 1.367164357     | 0.083897066     |
| 1.152745618 | 3.808814569    | 0.04541342      | 0.043069824     | 0.036283415     |
| 1.450561186 | 0.135624404    | 2.603170351     | 2.588498114     | 1.45267123      |
| 1.066826034 | 3.097363878    | 2.416644714     | 2.414890071     | 0.015716336     |
| 1.501211875 | 2.483114268    | 1.495849101     | 2.895247826     | 1.500899084     |
| 0.033818494 | 4.383315003    | 6.450923976     | 2.787908818     | 1.753592994     |
| 0           | 2.783064927    | 1.41509237      | 1.951582779     | 1.735981933     |
| 0.149251595 | 3.397995264    | 3.149278567     | 3.123945951     | 1.606638981     |
| 1.3194436   | 1.339095012    | 2.429548358     | 1.33917288      | 1.95289708      |
| 1.564204179 | 2.55976637     | 4.616175339     | 3.295684697     | 1.977770833     |
| 1.524276202 | 3.524932808    | 3.042986424     | 0.16069278      | 3.223900159     |
| 2.486773398 | 1.136117319    | 3.363617713     | 2.993021032     | 1.130250788     |
| 2.161716304 | 2.978554836    | 2.733498611     | 1.676051332     | 0.568493784     |
| 0.76571483  | 1.323843347    | 1.318977419     | 0.750344555     | 0               |
| 1.238942306 | 2.648339295    | 1.254590529     | 1.252361785     | 1.239874548     |
| 0.160861597 | 2.837213903    | 3.207804185     | 2.383674983     | 1.650652362     |
| 1.488902182 | 3.249617925    | 1.532526712     | 2.637323995     | 1.491261022     |
| 2.408389279 | 2.957994703    | 0.258782157     | 2.501823651     | 2.41381955      |
| 1.087512734 | 2.11708587     | 2.445734207     | 2.117123921     | 2.434479145     |
| 0.101151293 | 2.101760962    | 2.112217991     | 2.884348045     | 0.10243449      |
| 1.414320659 | 1.442619244    | 0.131829877     | 0.123828954     | 0.101533849     |
| 1.21829502  | 2.133908694    | 1.202001181     | 1.582974952     | 0               |
| 1.561048623 | 3.139879435    | 5.325519313     | 3.554473948     | 3.142293992     |
| 0.043984928 | 3.267100186    | 2.852538464     | 2.578124036     | 0.04448177      |
| 1.252778388 | 1.267159885    | 0.077094677     | 2.666944845     | 0.060758224     |
| 1.122184626 | 1.737238933    | 1.128956486     | 1.128095865     | 1.72826297      |
| 0.50041287  | 2.179456463    | 2.470639094     | 1.562318009     | 0.953806223     |
| 0           | 2.321525101    | 3.999551277     | 1.999612214     | 1.584621088     |
| 1.670643127 | 2.266359654    | 2.256820316     | 1.879707537     | 1.377463929     |
| 1.300078781 | 1.982586044    | 3.320291102     | 2.805723585     | 1.2991919       |
| 2.673871187 | 1.937347848    | 2.989076706     | 3.993463204     | 0.068542938     |
| 2.377075663 | 1.778340431    | 1.793944384     | 2.465185964     | 2.382224893     |
| 2.76858257  | 2.036774595    | 2.489864199     | 1.388641588     | 2.003654788     |
| 3.910729682 | 3.304654025    | 4.406653468     | 3.304539629     | 1.367487015     |
| 3.123446044 | 2.930074813    | 2.93888266      | 1.262155148     | 1.249044148     |
| 2.408448782 | 2.904548359    | 2.417436101     | 2.904589427     | 1.66442646      |
| 2.685394559 | 2.991777991    | 4.137043421     | 2.387332922     | 1.924163535     |
| 3.959802969 | 2.593909563    | 1.210600886     | 1.831596467     | 0.047362815     |
| 0.087521399 | 3.836351882    | 2.826304889     | 2.035516377     | 0.088602969     |
| 1.179851556 | 1.189200339    | 3.069352972     | 1.808749705     | 2.549706522     |
| 2.239972038 | 2.715680154    | 4.223004694     | 3.364865456     | 1.920375312     |
| 1.498030429 | 0.924445897    | 2.217121391     | 1.493334937     | 0               |
| 2.537333676 | 0.136741559    | 3.452747431     | 2.931297769     | 0.111772702     |
| 1.524220459 | 3.524860091    | 3.549078491     | 2.232646026     | 2.178816        |
| 0.079138554 | 1.350746576    | 0.102749013     | 1.994208556     | 0.080100476     |
| 2.624933012 | 4.492248269    | 5.142510362     | 2.133309324     | 0               |
| 1.594922333 | 3.012394911    | 1.008819261     | 2.597045901     | 1.008454971     |
| 0           | 2.284160415    | 1.819807014     | 2.780506938     | 1.168304317     |
| 1.163912989 | 1.788960161    | 0.048871064     | 1.789018586     | 1.164507493     |
| 1.066187254 | 3.557519718    | 1.069552259     | 2.088742358     | 1.066403934     |
| 2.866677373 | 3.388208101    | 3.876372175     | 2.3843376       | 1.044893163     |
| 0.776736563 | 3.452830484    | 2.651191558     | 1.302045244     | 2.016937408     |

|             |             |             |             |             |
|-------------|-------------|-------------|-------------|-------------|
| 1.088371759 | 1.969721019 | 2.513767364 | 1.726352177 | 0.599666382 |
| 0.868757749 | 3.25751344  | 1.418178085 | 2.392830028 | 0.868418583 |
| 1.615435548 | 0.70279964  | 2.987659811 | 2.361878706 | 2.172774521 |
| 2.972702594 | 3.27627235  | 5.142698675 | 2.653008963 | 1.866580345 |
| 0.02537129  | 3.157129309 | 0.031910071 | 1.720314114 | 1.108895112 |
| 1.390969978 | 3.555400263 | 1.776722558 | 1.779224946 | 0           |
| 0.689379621 | 3.197627931 | 2.321257362 | 2.513902117 | 1.889120075 |
| 0.006666377 | 1.620938863 | 2.626909385 | 0.007898281 | 2.036239545 |
| 1.96853913  | 2.963217488 | 3.13198201  | 0.974148673 | 0           |
| 3.062842139 | 3.455822627 | 3.096237924 | 3.284215189 | 1.816309365 |
| 1.185108544 | 1.194795171 | 1.81859731  | 3.590211978 | 0.044138302 |
| 0           | 0.985521576 | 0           | 0.985519814 | 0.986033287 |
| 2.562921101 | 2.783111377 | 2.782598853 | 2.561084622 | 1.565219407 |
| 1.063676121 | 1.938155284 | 2.137661114 | 3.203215772 | 1.062417155 |
| 2.233618519 | 2.227122818 | 1.907751182 | 0           | 0           |
| 2.210371501 | 2.557554178 | 0.051185049 | 2.227811299 | 1.784981498 |
| 2.195278169 | 2.705286554 | 1.594111028 | 1.585133295 | 0.135080921 |
| 1.006345253 | 1.006605145 | 1.592993829 | 2.008552829 | 0.001482005 |
| 1.865748948 | 2.652395684 | 1.978286431 | 0.287512474 | 2.542947513 |
| 3.36192883  | 2.039817671 | 5.090898925 | 5.293014815 | 2.62412477  |
| 0.200055717 | 3.018793057 | 0.27944263  | 2.561525103 | 0.203056855 |
| 1.046072662 | 1.048071962 | 2.062847394 | 0.01269715  | 1.046220179 |
| 0.831668103 | 2.080621    | 3.056788128 | 1.372348163 | 2.094661803 |
| 0.064121343 | 2.958871544 | 0.082511796 | 0.077929121 | 1.270463974 |
| 0           | 3.064958887 | 4.932505157 | 3.353245427 | 2.903744947 |
| 1.415825347 | 1.807522552 | 2.118018489 | 2.955460543 | 0           |
| 1.14502088  | 2.193126686 | 0.043033031 | 1.152252861 | 0.034417353 |
| 0           | 2.559609002 | 3.879349745 | 3.558337303 | 0.982320103 |
| 2.411587899 | 2.808071917 | 2.137569604 | 3.263422445 | 1.835343646 |
| 0.049034409 | 1.218608304 | 2.280339395 | 1.218649928 | 2.254749702 |
| 1.608095151 | 1.658448895 | 1.669831581 | 0.190046082 | 0.152559628 |
| 1.421645517 | 2.889048875 | 2.11706052  | 2.106661538 | 1.423575057 |
| 1.580070801 | 2.108250901 | 0           | 2.506292785 | 1.196753005 |
| 2.955823685 | 2.77741606  | 0           | 1.95639998  | 0           |
| 3.213068157 | 3.240509499 | 3.381299271 | 2.357886151 | 3.454171802 |
| 1.698283771 | 1.705714943 | 2.458764683 | 3.140465879 | 1.097130228 |
| 0           | 1.54522971  | 0.966945747 | 0           | 1.959704989 |
| 1.590520675 | 2.591704021 | 1.590914204 | 2.591706537 | 2.328065011 |
| 0.048765716 | 4.301862999 | 1.845340331 | 3.099594917 | 1.825028651 |
| 0           | 3.000297744 | 2.63801124  | 2.421518104 | 1.450350985 |
| 1.326443734 | 1.705963513 | 4.647187719 | 2.014110247 | 0           |
| 0           | 0.965707951 | 1.543130629 | 2.537350256 | 2.540739459 |
| 1.210219854 | 0.059965795 | 3.308359179 | 3.104957318 | 1.8294638   |
| 0.226863857 | 3.139510906 | 2.715910116 | 0.296454898 | 0.230404808 |
| 0.859466627 | 3.687535112 | 0.854494484 | 0.854894183 | 1.415493053 |
| 0           | 3.336366555 | 2.68571506  | 1.48335596  | 1.488156871 |
| 1.423883298 | 3.116495396 | 2.96158387  | 3.37751936  | 1.423320577 |
| 1.689479601 | 2.677176212 | 3.186267768 | 2.320143308 | 0.842930881 |
| 0.019007168 | 2.109153645 | 1.688018799 | 3.442021593 | 1.680981889 |
| 0.003510714 | 2.34315197  | 1.604160516 | 2.020432221 | 2.605083736 |
| 1.688121786 | 1.694822926 | 2.712513702 | 1.694851305 | 1.088337722 |
| 1.34322395  | 0           | 2.03040371  | 2.03420191  | 1.342439577 |
| 1.144642675 | 2.747011491 | 2.427743105 | 2.880486303 | 2.46943951  |
| 1.956854097 | 0.094998978 | 1.994560149 | 1.344875353 | 0.078718334 |
| 0           | 1.743467852 | 2.056794291 | 1.328201747 | 0.767886542 |
| 0           | 2.278378693 | 1.321339856 | 0.787182792 | 0.792687944 |
| 2.333664473 | 1.168787266 | 2.084087586 | 3.275056318 | 1.562919078 |
| 2.468797492 | 0.910755452 | 4.184429843 | 1.882782963 | 2.689137308 |



|             |             |             |             |             |
|-------------|-------------|-------------|-------------|-------------|
| 1.18772262  | 3.974665828 | 3.448053984 | 1.818487856 | 2.231148521 |
| 2.23231472  | 2.380281653 | 3.581012599 | 3.161523639 | 1.101427002 |
| 1.339763834 | 2.78192771  | 3.294813601 | 1.36123793  | 0.082519057 |
| 1.260352424 | 2.280221957 | 2.871322279 | 1.235378706 | 0.469495766 |
| 0.055827146 | 2.311446146 | 1.250783689 | 2.311565024 | 1.236353916 |
| 1.113036831 | 2.969344826 | 2.748296136 | 1.725921073 | 1.717652753 |
| 0.017693043 | 1.679778986 | 1.680961654 | 1.079401351 | 1.076203173 |
| 2.470161319 | 3.678299642 | 3.899483306 | 2.264875635 | 1.911061058 |
| 0.268340621 | 0.356627663 | 0.390959365 | 0.357189342 | 0.272775842 |
| 1.307788282 | 2.405187642 | 0.095220447 | 1.326544753 | 0.074467299 |
| 0.019105879 | 1.085703653 | 1.688548505 | 1.687285872 | 2.915792134 |
| 0.068470918 | 2.712375144 | 2.721874046 | 2.712549835 | 0.069285423 |
| 1.669482496 | 3.807684833 | 2.689473621 | 2.911196982 | 1.669843159 |
| 1.627959256 | 2.359713074 | 2.379565132 | 2.813456671 | 0.15792304  |
| 0.012816264 | 2.887027976 | 2.075174346 | 1.057574512 | 1.650067173 |
| 0.972096896 | 2.544769888 | 1.549615212 | 0.971007973 | 0           |
| 0.058891295 | 1.26203823  | 2.334509844 | 1.892960059 | 2.302929606 |
| 0.639788992 | 2.42981256  | 2.028407346 | 2.034942992 | 0           |
| 1.565106099 | 0           | 2.97469827  | 2.782866493 | 0.983191521 |
| 2.677630934 | 2.378689984 | 4.011068657 | 2.378842223 | 1.916777776 |
| 2.064114932 | 1.450951296 | 1.456745404 | 2.889666893 | 0.103486433 |
| 2.127309109 | 3.044045303 | 4.720403879 | 3.616736001 | 2.124733513 |
| 1.902114793 | 2.691740579 | 2.683460912 | 1.878146164 | 1.595872015 |
| 2.368830651 | 0.574481167 | 2.481078508 | 3.295800297 | 0.581626271 |
| 2.122546434 | 2.95888738  | 0.153784824 | 1.510221458 | 1.477735478 |
| 0.893333629 | 2.170350106 | 1.852811725 | 1.450685297 | 0           |
| 3.748829674 | 3.276847427 | 3.061938918 | 3.049351296 | 0.081749005 |
| 3.297702244 | 3.501701037 | 3.338979137 | 3.794083759 | 1.232529843 |
| 1.660170191 | 2.899745716 | 2.67796228  | 1.664948729 | 1.660488886 |
| 2.369770879 | 2.861044045 | 4.450132478 | 2.049815235 | 0.008686125 |
| 0.716103483 | 2.723892647 | 3.529649032 | 1.22379639  | 1.236646784 |
| 0.922247651 | 3.204182191 | 2.470080888 | 0.91944125  | 1.491861768 |
| 0           | 1.954063486 | 2.756581789 | 2.949687322 | 0.965940517 |
| 1.094856039 | 1.09926292  | 2.456035905 | 2.943692378 | 2.118336557 |
| 1.560873332 | 2.293372394 | 1.972147964 | 1.972538213 | 0.979616731 |
| 0.082528556 | 0.101016551 | 2.461860632 | 0.101123971 | 1.345269047 |
| 1.293401232 | 1.948797063 | 1.955078873 | 1.948919355 | 1.923667485 |
| 1.037262221 | 1.63155055  | 3.226235355 | 3.962981124 | 1.037380359 |
| 2.920618261 | 1.393232055 | 3.075869133 | 3.853079252 | 1.708847093 |
| 1.811279008 | 3.565535668 | 3.294355895 | 2.424518237 | 1.134761442 |
| 2.132050262 | 2.142338083 | 1.719575795 | 0.029747029 | 0.02517523  |
| 0.960628319 | 0.496738012 | 2.72832652  | 1.569134523 | 2.90370665  |
| 1.872157491 | 2.329102377 | 0.075874969 | 1.263177687 | 1.250000946 |
| 0           | 1.243853245 | 1.514774697 | 2.132154722 | 1.787996058 |
| 0.064519555 | 2.69104637  | 2.365150853 | 1.921321374 | 2.330031102 |
| 1.156829981 | 0.044218885 | 1.782961133 | 0.044260739 | 2.787472908 |
| 0.003764481 | 2.830992424 | 1.605545277 | 3.346148584 | 1.60424331  |
| 0.904856604 | 1.870512711 | 1.464200467 | 0.901517701 | 0           |
| 0.680423813 | 1.553344872 | 0.672758794 | 1.852522193 | 0           |
| 1.988337511 | 1.967975813 | 2.215441732 | 3.074181972 | 0           |
| 2.131494368 | 1.205464013 | 2.372870999 | 1.709394894 | 2.288781121 |
| 0.040799608 | 2.230242282 | 1.183618615 | 2.560238013 | 1.173901377 |
| 0           | 0.946850803 | 2.509532819 | 0.946844888 | 0.94862673  |
| 0.979331126 | 2.555221485 | 4.426817493 | 3.428307637 | 0.979269829 |
| 0           | 2.436267244 | 2.653231858 | 2.656089425 | 0.897647805 |
| 1.912181572 | 2.138583918 | 2.345113083 | 1.888588813 | 1.910599095 |
| 2.481474805 | 2.167431879 | 2.170394526 | 0.035188689 | 1.125970531 |
| 0           | 1.343650846 | 3.393814631 | 2.047374681 | 1.353478103 |

| hsa-miR-520f-3p | hsa-miR-937-3p | hsa-miR-520h | hsa-miR-526b-5p | hsa-miR-519c-3p |
|-----------------|----------------|--------------|-----------------|-----------------|
| 0.111214861     | 2.77789287     | 0.108871639  | 1.336849397     | 0.109314115     |
| 0.071627792     | 2.627542597    | 0.070231198  | 0.073021588     | 0.070495282     |
| 0.034288217     | 2.74139294     | 0.033670571  | 0.034902704     | 0.03378751      |
| 0.017778764     | 3.256175585    | 0.017470193  | 1.654845581     | 0.017528647     |
| 0.120528677     | 0.115453186    | 0.117944698  | 2.019360358     | 0.118432478     |
| 0.050044724     | 4.410696077    | 1.160865644  | 0.050974008     | 0.049288405     |
| 0.163137638     | 4.593106395    | 0.15936472   | 0.166932932     | 0.160075865     |
| 0.021307077     | 4.354648268    | 0.020934274  | 2.417355137     | 0.021004888     |
| 0               | 2.700044966    | 0            | 0               | 0               |
| 1.150533248     | 7.05129896     | 0.04620516   | 0.047945557     | 0.046370179     |
| 0               | 2.326381893    | 0            | 0.59372674      | 0               |
| 0.230804887     | 3.174011957    | 0.224848909  | 0.236832605     | 0.225968799     |
| 0.110562704     | 3.049081279    | 0.108236083  | 0.112892403     | 0.108675434     |
| 0               | 4.615320679    | 0            | 0.982214496     | 0               |
| 0.194849942     | 4.884273487    | 0.190098973  | 0.199642582     | 0.190993452     |
| 0.042214847     | 3.521861426    | 0.041441102  | 1.747247331     | 0.041587557     |
| 0.569156622     | 2.289683889    | 0            | 1.913011355     | 0               |
| 3.174516429     | 1.894030641    | 1.320947737  | 4.356465439     | 1.727512822     |
| 1.887967655     | 3.358563033    | 1.889141261  | 4.774400582     | 0.079214329     |
| 0.251522471     | 3.749664242    | 0.244825783  | 0.258312623     | 0.246083994     |
| 0.179428289     | 2.212208448    | 0.175162871  | 2.665274763     | 1.533974801     |
| 1.8353278       | 1.840105657    | 0.290895654  | 1.822425436     | 1.839187529     |
| 0.028084336     | 3.304355424    | 1.091583321  | 1.089659411     | 0.027679864     |
| 5.615702638     | 1.45407918     | 4.095875211  | 6.453005205     | 3.193351008     |
| 0.148131957     | 3.184421124    | 1.448878685  | 3.186556463     | 0.145423602     |
| 0               | 2.830396928    | 0            | 0               | 0.696842514     |
| 0               | 4.359573796    | 0            | 3.427408152     | 0               |
| 0.06177891      | 3.746630689    | 0.060598525  | 1.19290194      | 0.0608218       |
| 0.085562256     | 1.906994424    | 0.083846619  | 0.087276483     | 0.084170875     |
| 0.039643175     | 4.099088278    | 0.038920621  | 0.040362351     | 0.039057398     |
| 0.501943347     | 4.657694087    | 0            | 0               | 0.499261913     |
| 0               | 3.906430649    | 0            | 2.321515955     | 0               |
| 1.006847431     | 1.868680452    | 0            | 3.014973308     | 1.004121907     |
| 0               | 6.415737005    | 0            | 3.416247809     | 0               |
| 0.097171978     | 2.725856854    | 0.095178771  | 1.941634467     | 0.095555337     |
| 1.798478904     | 2.978218417    | 0.276292367  | 4.40365397      | 0.27778144      |
| 0.128268959     | 2.051150313    | 0.125479675  | 0.131066222     | 0.126006068     |
| 0.817640443     | 5.250034942    | 0            | 1.360463313     | 0               |
| 0.083837219     | 3.699626756    | 0.082161914  | 0.085510901     | 0.082478566     |
| 0.021489978     | 5.753015057    | 0.021113819  | 0.021863818     | 1.070313111     |
| 1.958252202     | 4.15165738     | 0.098747537  | 0.102914323     | 0.099140996     |
| 0.065941148     | 6.582372507    | 0.06467033   | 0.067208811     | 0.064910678     |
| 0.127811668     | 5.264615373    | 0.125034644  | 3.113637277     | 0.125558732     |
| 1.812674802     | 3.075311195    | 2.849380727  | 7.038439418     | 1.813510196     |
| 0               | 4.541579298    | 0            | 0               | 0               |
| 2.216048312     | 3.055672675    | 2.215851133  | 4.735622144     | 2.215861404     |
| 0.164549233     | 5.653714429    | 0.160734469  | 1.483477037     | 0.161453466     |
| 0.194825338     | 4.491515101    | 0.190075158  | 2.250607357     | 0.190969489     |
| 0.114695866     | 0.109916951    | 0.112263466  | 0.117132353     | 0.112722726     |
| 0               | 4.779006269    | 0            | 0               | 0               |
| 0.002639451     | 3.820781561    | 0.002595232  | 2.334004235     | 0.002603613     |
| 0               | 3.017813992    | 0            | 0               | 0               |
| 0.05389661      | 3.247538363    | 0.052883716  | 0.054905968     | 0.053075361     |
| 0.021099197     | 3.100917215    | 0.020730207  | 0.021465901     | 0.020800099     |
| 0.014170615     | 4.15891074     | 0.013926704  | 0.014412877     | 0.013972915     |
| 9.696524216     | 4.145924318    | 8.565957954  | 12.56246484     | 9.382572771     |

|             |             |             |             |             |
|-------------|-------------|-------------|-------------|-------------|
| 0.599677602 | 3.014352584 | 0           | 0           | 0           |
| 1.419128223 | 2.387156732 | 0           | 0.86791943  | 0.86538357  |
| 0           | 5.018428435 | 0           | 1.597278904 | 0           |
| 0           | 2.290996848 | 0           | 0.676265719 | 0           |
| 0.035058521 | 3.977893445 | 0.034425924 | 2.476587565 | 1.113678006 |
| 0           | 2.341384543 | 0           | 0           | 0           |
| 0           | 3.857702395 | 0           | 0           | 0           |
| 0.009063745 | 2.363405326 | 0.00890958  | 0.009216805 | 0.008938793 |
| 0           | 5.129116114 | 0           | 0.97475972  | 0           |
| 0.066073953 | 6.016259162 | 0.064800228 | 0.067344532 | 0.065041124 |
| 0.06128405  | 2.856021164 | 0.060114325 | 2.855657124 | 1.19538141  |
| 0           | 1.567258346 | 0           | 2.78627005  | 0           |
| 1.977126576 | 4.830874474 | 3.295781457 | 5.87888748  | 3.143986171 |
| 0.581287702 | 1.688114467 | 0           | 1.411669379 | 0           |
| 0           | 3.216025319 | 0           | 0           | 0.930846949 |
| 0.056477763 | 3.966867307 | 0.055410565 | 0.057541465 | 0.055612467 |
| 0.20304077  | 2.742103384 | 0.198024272 | 2.739606564 | 0.198968464 |
| 3.595088758 | 3.469412859 | 3.710575457 | 6.654575752 | 3.179814625 |
| 0.365711897 | 4.064794756 | 0.354323894 | 0.377382662 | 0.356454436 |
| 0.00933304  | 3.747302725 | 0.009174194 | 0.00949075  | 0.009204294 |
| 0.324915969 | 1.900557211 | 0.3153224   | 2.609923177 | 0.317119993 |
| 0.014595408 | 2.653155542 | 0.014343938 | 1.642504032 | 0.01439158  |
| 0           | 3.311361477 | 0           | 0           | 0           |
| 1.285143936 | 2.977384858 | 1.287144454 | 2.365609701 | 1.286859476 |
| 0           | 4.133934757 | 0           | 0           | 0           |
| 0           | 0.854951369 | 0           | 0           | 0           |
| 1.151522909 | 2.199138999 | 0.046517893 | 4.037150688 | 0.046684143 |
| 0           | 2.972866357 | 0           | 0.982103854 | 0           |
| 0.870027144 | 3.254911473 | 0           | 0.871700854 | 0           |
| 0.069179035 | 3.638957624 | 0.067836917 | 0.070518187 | 0.068090721 |
| 2.837064254 | 3.180517479 | 2.371042146 | 4.387151986 | 0.228068753 |
| 0.151134745 | 4.095844227 | 0.147711277 | 2.117379596 | 0.148356831 |
| 0           | 2.935604837 | 0           | 0           | 0.680931859 |
| 0.745635938 | 1.949247803 | 0           | 0           | 0           |
| 1.807488047 | 3.438347671 | 0.508717244 | 3.209337221 | 1.573310908 |
| 0.031156616 | 2.133147944 | 0.030599263 | 1.705931279 | 1.101286446 |
| 0           | 0           | 0           | 0           | 0           |
| 0.001470695 | 3.814848822 | 0.001446125 | 3.177237057 | 1.004878161 |
| 0.068783602 | 1.847605864 | 0.067450237 | 0.070113977 | 0.067702389 |
| 0           | 3.404686493 | 0.884826842 | 3.143543381 | 0           |
| 0           | 4.884331966 | 0           | 0           | 0           |
| 0           | 1.954317616 | 0           | 0           | 0           |
| 0.070168462 | 4.975223608 | 1.222688451 | 0.071529633 | 0.069062337 |
| 2.019852942 | 3.57836949  | 0.366418599 | 3.883624048 | 2.02375816  |
| 0.856829639 | 4.623111648 | 2.116256798 | 1.806973246 | 0           |
| 0.917273585 | 2.874594578 | 0           | 0           | 0.916766115 |
| 0           | 2.600822245 | 0           | 0           | 0           |
| 0           | 2.542837922 | 0           | 1.166560268 | 0           |
| 0.026119558 | 2.439083649 | 0.025657549 | 1.083498047 | 0.025745045 |
| 0.004760309 | 4.272341745 | 0.004680157 | 0.004839858 | 0.004695347 |
| 0.028259081 | 2.9395698   | 0.02775682  | 3.134230904 | 0.027851933 |
| 2.998354861 | 3.913882382 | 0.795975225 | 3.665934517 | 2.027995406 |
| 7.228597398 | 5.273089001 | 7.434650423 | 9.659795757 | 7.281540835 |
| 0.112581884 | 2.444137314 | 0.110203755 | 0.114963573 | 0.110652801 |
| 0           | 3.047675781 | 0           | 0           | 0           |
| 0           | 3.655996411 | 0           | 0           | 0           |
| 1.170788046 | 3.442996367 | 0           | 0.675706931 | 0           |
| 2.196642014 | 3.85984388  | 2.196399966 | 5.438363282 | 1.475629645 |

|             |             |             |             |             |
|-------------|-------------|-------------|-------------|-------------|
| 0.062202178 | 5.999253991 | 0.06101266  | 0.06338837  | 0.06123766  |
| 0           | 5.491039442 | 0           | 0           | 0           |
| 3.686351156 | 3.308073504 | 1.364973405 | 6.943695199 | 1.364627119 |
| 0           | 4.530198778 | 0           | 0           | 0           |
| 8.686680194 | 3.156662875 | 7.672441518 | 10.11415033 | 6.355418666 |
| 0.036568842 | 3.761241039 | 0.035906795 | 0.037227626 | 1.118457624 |
| 0.024286004 | 2.104552562 | 0.0238582   | 3.92855799  | 0.023939224 |
| 0           | 3.013901169 | 0           | 1.875069879 | 0           |
| 0.466872476 | 0.435124463 | 0.450465535 | 3.815910091 | 0.453523113 |
| 0.106111299 | 2.759138709 | 0.103897088 | 1.322368843 | 0.104315277 |
| 1.085113428 | 2.930509874 | 0.025792862 | 3.125024462 | 0.025880848 |
| 0.09828736  | 3.602764451 | 0.096266923 | 0.100308335 | 0.096648619 |
| 0.02299878  | 5.116101984 | 0.022594829 | 0.02340029  | 0.022671338 |
| 0.242338219 | 2.395623942 | 0.235974077 | 0.248785776 | 0.237170209 |
| 4.337382879 | 2.666515561 | 6.156689604 | 7.887225148 | 4.733555593 |
| 0           | 3.278112016 | 1.549551882 | 4.81148054  | 1.549574948 |
| 0.083815634 | 2.946692109 | 0.082140832 | 0.085488811 | 0.082457389 |
| 3.46114829  | 3.088001248 | 3.692284639 | 5.301321464 | 2.974029639 |
| 0.982752899 | 3.558378867 | 0           | 1.564038217 | 0.982646596 |
| 1.304685545 | 3.003043717 | 1.306812364 | 2.389895802 | 0.096721703 |
| 0.151240205 | 2.919192001 | 0.147813716 | 0.154683405 | 0.148459838 |
| 0           | 5.421126775 | 0           | 0           | 0           |
| 0           | 2.957113577 | 0           | 0           | 0           |
| 0           | 3.1796388   | 0           | 0           | 0           |
| 1.515555864 | 1.520125656 | 0.169580575 | 1.507748296 | 0.170350994 |
| 0           | 1.449219227 | 0           | 1.853771751 | 0           |
| 0.117223867 | 3.970857826 | 0.114726102 | 1.353793358 | 0.115197662 |
| 0.077859871 | 2.651985559 | 0.076322491 | 0.079394981 | 0.076613134 |
| 0.020396779 | 4.189407386 | 0.020040643 | 0.020750688 | 0.020108102 |
| 0.011707519 | 5.918357801 | 0.011507153 | 1.037799037 | 0.011545117 |
| 0           | 3.764241244 | 1.223084409 | 2.71068471  | 0           |
| 0.920392672 | 4.120873544 | 0           | 1.893569084 | 0           |
| 0           | 2.272721799 | 0           | 0           | 0           |
| 0.030511355 | 3.468608378 | 0.029966328 | 4.739583691 | 0.030069532 |
| 0           | 2.554696116 | 0           | 0           | 0           |
| 0.11997611  | 2.470154827 | 0.117406607 | 2.017551906 | 0.117891664 |
| 7.777811226 | 2.738925232 | 6.975288351 | 10.52909735 | 7.411348689 |
| 0.011772165 | 3.379945002 | 0.011570662 | 0.011972267 | 0.011608842 |
| 0           | 3.82214373  | 0           | 0           | 0           |
| 7.51834762  | 4.998010551 | 6.322432077 | 9.353241336 | 6.972818699 |
| 8.153457881 | 1.112152543 | 5.727928513 | 9.827582432 | 8.168769895 |
| 6.061012947 | 4.912435686 | 4.40100358  | 6.911166127 | 3.021972126 |
| 0.084185493 | 1.902183023 | 0.082502064 | 0.085867341 | 0.082820248 |
| 0           | 2.115880765 | 0.474388512 | 0           | 0           |
| 0.092288284 | 2.97971356  | 0.09041314  | 0.094162963 | 0.09076746  |
| 4.499293051 | 2.546237518 | 3.042463429 | 5.901693776 | 3.238364434 |
| 9.91904583  | 2.022448481 | 8.656297828 | 13.19954261 | 9.229121696 |
| 0           | 2.852083095 | 0           | 1.466130693 | 0           |
| 3.360495357 | 2.30114903  | 1.844948486 | 5.634879446 | 1.549301155 |
| 0           | 4.045236221 | 1.274230358 | 0.756216106 | 0           |
| 1.208422901 | 2.609214577 | 0           | 2.495805127 | 1.473731428 |
| 4.923227372 | 3.433757188 | 4.920922585 | 8.374700971 | 4.800609693 |
| 0           | 3.378193931 | 0           | 0           | 0           |
| 0           | 2.968172978 | 0           | 0           | 0.978604768 |
| 8.796755097 | 2.650840341 | 7.940874396 | 11.04429439 | 7.084196966 |
| 1.882407669 | 4.189093096 | 1.881128571 | 3.090741356 | 1.583148748 |
| 9.107872378 | 1.744598581 | 8.187408177 | 11.41903796 | 7.452835292 |
| 6.143970321 | 3.683614326 | 5.065495998 | 7.583247302 | 3.589616945 |

| hsa-miR-216a-3p | hsa-miR-520a-5p | hsa-miR-541-3p | hsa-miR-5003-3p | hsa-miR-518b |
|-----------------|-----------------|----------------|-----------------|--------------|
| 2.439742698     | 0.111842125     | 1.994040061    | 0.074667757     | 0.11251749   |
| 2.628353639     | 0.07200085      | 0.067768627    | 1.212280863     | 0.072402138  |
| 0.034303627     | 0.034452877     | 1.111983963    | 1.105311927     | 1.1098543    |
| 2.076893625     | 0.017860956     | 0.016922712    | 2.393001017     | 1.057594468  |
| 1.368439977     | 0.121220743     | 2.470440873    | 0.080456668     | 0.121966045  |
| 0.050068013     | 0.050293618     | 1.161726178    | 2.185667794     | 0.050561211  |
| 0.163232303     | 0.164150521     | 2.160715681    | 0.106124716     | 0.165242454  |
| 4.195259965     | 0.021406395     | 2.091866913    | 1.66261329      | 1.068859611  |
| 0.928033216     | 0               | 0.927021927    | 1.911425774     | 0.92845364   |
| 0.047098895     | 0.047309744     | 1.152436482    | 1.142813273     | 0.047559819  |
| 2.486156015     | 0               | 0              | 0.591424449     | 0            |
| 3.464056112     | 0.23240996      | 1.669824846    | 0.144347363     | 0.234143225  |
| 0.110620944     | 0.111185502     | 1.34375818     | 0.074259933     | 0.111856048  |
| 5.015241371     | 0               | 3.672689391    | 0.982612402     | 1.562947813  |
| 0.194969319     | 0.196127666     | 0.181843608    | 0.124407338     | 0.197506191  |
| 1.135378341     | 0.042421207     | 0.040072122    | 0.029615786     | 0.04264303   |
| 0               | 0               | 5.175556845    | 0.571016354     | 0.571388462  |
| 2.526495685     | 3.238475973     | 3.309479428    | 0.365738826     | 3.41497979   |
| 4.62779442      | 1.887376287     | 1.888925701    | 0.055104606     | 3.361617495  |
| 8.168813947     | 0.253329302     | 0.23326947     | 2.295989193     | 1.71299474   |
| 1.5308919       | 1.529539323     | 1.535667624    | 0.115600677     | 1.527529568  |
| 0.299650854     | 0.301745712     | 2.545667164    | 2.395308284     | 0.304245119  |
| 0.028096781     | 0.028217311     | 1.092110411    | 1.686414167     | 2.119733411  |
| 6.188197327     | 4.557791578     | 2.118384673    | 1.41313479      | 4.980112309  |
| 6.051020357     | 0.149027288     | 1.450290796    | 0.097233978     | 2.910936545  |
| 4.757439152     | 0               | 1.201865916    | 0.702418042     | 0.700287043  |
| 0               | 0               | 0.97895983     | 0               | 2.292828384  |
| 4.620470332     | 0.062094048     | 1.822103324    | 1.798870425     | 1.194442634  |
| 0.085605154     | 0.08602088      | 3.17988655     | 1.250305779     | 0.086514372  |
| 0.039661206     | 0.039835855     | 1.740252941    | 1.121127488     | 0.040042963  |
| 1.98899539      | 0               | 4.039474598    | 0               | 0.504410256  |
| 3.806891439     | 0               | 0.999699662    | 0.999714668     | 0            |
| 0.547937375     | 0.54887687      | 1.000726258    | 1.021598022     | 2.68211467   |
| 1.673018203     | 0               | 0.759522948    | 1.30229358      | 1.977743804  |
| 2.38902322      | 0.097705138     | 1.304640731    | 1.281248024     | 0.09827899   |
| 7.096092444     | 2.985565773     | 1.802228179    | 0.17254114      | 2.509099012  |
| 0.128338836     | 0.12901633      | 4.880068789    | 0.085217774     | 0.129821342  |
| 5.048741239     | 0               | 5.906466272    | 0.821573471     | 0            |
| 1.899576142     | 0.08428502      | 0.079212111    | 1.245651586     | 0.084766846  |
| 2.092582048     | 0.021590192     | 2.092636816    | 2.671775402     | 0.021697864  |
| 1.311798619     | 0.101387685     | 0.095087395    | 0.068134783     | 0.101987528  |
| 0.065972897     | 0.066280506     | 1.210884556    | 2.239433444     | 0.066645494  |
| 1.389073575     | 0.128555734     | 1.393242612    | 1.359855145     | 2.496698461  |
| 2.579400774     | 2.579178856     | 1.813615072    | 1.79137083      | 4.934531853  |
| 3.22297613      | 0               | 8.724092911    | 0.938138303     | 0            |
| 2.47568793      | 3.055093312     | 1.898991277    | 1.498833237     | 2.886685433  |
| 5.847491753     | 0.165573431     | 2.617785627    | 2.862040095     | 1.48766355   |
| 0.194944695     | 0.196102848     | 0.18182114     | 0.124393411     | 0.19748114   |
| 7.629625539     | 0.115347126     | 0.107996141    | 2.391283687     | 0.116048386  |
| 1.816763915     | 0               | 7.179965514    | 2.407009014     | 0            |
| 0.002640553     | 0.00265122      | 2.334071488    | 2.595955016     | 2.820141195  |
| 2.454203817     | 1.157449105     | 0              | 0.664372036     | 0            |
| 3.249451665     | 0.054166919     | 1.793327927    | 1.162435816     | 0.054457562  |
| 1.668581365     | 0.021197499     | 1.669081918    | 0.015009973     | 0.021303116  |
| 1.641485898     | 0.014235571     | 1.04692481     | 2.055325637     | 0.01430535   |
| 0               | 9.916126724     | 4.942753649    | 0               | 10.27791676  |

|             |             |             |             |             |
|-------------|-------------|-------------|-------------|-------------|
| 6.196535692 | 0.600617974 | 0.594119026 | 0           | 0           |
| 0           | 0.866550226 | 0           | 1.832732602 | 1.818832991 |
| 0           | 1.217948013 | 1.591135085 | 1.618759109 | 1.218957676 |
| 0           | 0           | 7.043324723 | 1.187181103 | 0           |
| 8.212862367 | 0.035227173 | 0.033305755 | 0.024711113 | 1.112265073 |
| 4.972329307 | 0           | 2.915184285 | 1.793629004 | 0           |
| 3.063319981 | 0           | 0           | 2.551101564 | 0.68898918  |
| 4.506496842 | 0.00910479  | 1.03012118  | 0.006500115 | 0.009148878 |
| 7.38428145  | 0           | 0.974067771 | 1.968886432 | 0.974574218 |
| 1.836611504 | 0.06641409  | 0.062552852 | 1.812546205 | 0.066779918 |
| 3.281276948 | 1.193653531 | 0.058049302 | 0.042464431 | 1.192945519 |
| 0           | 0           | 1.567256027 | 1.568629465 | 1.980885868 |
| 4.972399833 | 4.220710639 | 1.977083822 | 2.300546473 | 5.14218231  |
| 6.085137051 | 0           | 1.40196552  | 1.066850499 | 0           |
| 5.719465239 | 0.931452691 | 1.499622037 | 2.496041658 | 0           |
| 0.056504414 | 0.056762602 | 0.05352549  | 0.039255778 | 0.057068888 |
| 0.203166866 | 0.20439053  | 0.189316156 | 0.129021654 | 0.205847071 |
| 2.331091092 | 5.40289769  | 1.593029353 | 0.001430841 | 5.68305283  |
| 4.473821574 | 0.368805123 | 0.334947651 | 0.212569637 | 0.372157152 |
| 0.009336999 | 0.009375332 | 3.04512815  | 0.006692029 | 0.009420759 |
| 0.325158489 | 0.327515493 | 0.29891613  | 1.780269753 | 0.330329464 |
| 1.047672076 | 0.014662378 | 1.04831718  | 0.01042838  | 1.047384657 |
| 0           | 0           | 1.765212016 | 1.383697662 | 0           |
| 8.689254691 | 0.092183611 | 1.288431992 | 1.266708956 | 3.73643774  |
| 4.206322079 | 0           | 0.927442753 | 1.911945689 | 0           |
| 0           | 0           | 2.11634677  | 0.860165089 | 0           |
| 6.852941673 | 1.768066234 | 2.198706008 | 1.752020288 | 1.150554206 |
| 1.562705145 | 0           | 0.981613156 | 0           | 0           |
| 0           | 0.870368527 | 2.969397305 | 1.837678706 | 0.870802102 |
| 5.141469622 | 0.069537494 | 0.065469725 | 1.205495878 | 0.069923057 |
| 4.633567415 | 2.836454181 | 0.21650238  | 1.600289509 | 3.90967808  |
| 0.151220596 | 0.152053201 | 2.574011135 | 0.09902579  | 1.4512101   |
| 7.921121104 | 0           | 0           | 0           | 0.684534189 |
| 1.266249843 | 0           | 0           | 1.980770163 | 0           |
| 0           | 0.959665481 | 0           | 2.558672886 | 2.009557568 |
| 1.100642227 | 0.031305177 | 1.101972923 | 1.697067401 | 0.03146483  |
| 2.27605797  | 0           | 0.966988583 | 1.54772011  | 0           |
| 0.001471307 | 0.001477234 | 2.32870415  | 1.590465505 | 2.006449652 |
| 4.024368073 | 0.069139717 | 0.065098374 | 1.204397292 | 0.069522754 |
| 8.007501273 | 0           | 0.88405942  | 0.88875652  | 0.886338839 |
| 4.389055367 | 0           | 2.663624411 | 1.328503329 | 0           |
| 0           | 0           | 0           | 0.967224434 | 0           |
| 1.221061704 | 0.070532804 | 1.852297826 | 1.208241123 | 0.070924704 |
| 0.378694585 | 0.38164562  | 2.020400457 | 1.87455785  | 0.385173581 |
| 6.976858216 | 0           | 0.854824266 | 2.975259139 | 0           |
| 0.91729281  | 0.917493741 | 2.464165798 | 1.489397112 | 0           |
| 3.586846874 | 0           | 0           | 0.866730059 | 0           |
| 0           | 0.424456955 | 1.836166322 | 1.184648504 | 0.425941083 |
| 2.111984557 | 0.026242673 | 0.024838608 | 1.080866031 | 0.026374965 |
| 1.015653332 | 0.004781644 | 1.01586772  | 1.602695653 | 0.004804558 |
| 2.448478778 | 1.696014934 | 2.120916941 | 1.087306675 | 1.695700553 |
| 5.652948389 | 3.256463706 | 1.720727356 | 2.311717843 | 1.723115192 |
| 3.195657177 | 8.280882838 | 2.584787188 | 1.826049211 | 8.451747609 |
| 1.997858959 | 0.11321854  | 0.106030599 | 1.321321853 | 0.113904039 |
| 0           | 0           | 2.050817622 | 0           | 0           |
| 0           | 0           | 2.017601661 | 0.794391517 | 0.791533533 |
| 2.913958848 | 0           | 1.538499537 | 2.123541421 | 0           |
| 6.296214529 | 3.445692438 | 0           | 0.914408681 | 2.197035993 |

|             |             |             |             |             |
|-------------|-------------|-------------|-------------|-------------|
| 0.062231891 | 0.062519762 | 2.256826867 | 2.55481792  | 0.062861303 |
| 0.610447106 | 0           | 2.804438325 | 1.776579285 | 0           |
| 3.842191716 | 1.361468091 | 0.111444625 | 0.079143875 | 3.686578814 |
| 0.904976838 | 0.473636853 | 2.759850052 | 0.917427025 | 0           |
| 2.658347445 | 8.513521516 | 1.251247816 | 1.233170797 | 8.729968294 |
| 3.344509513 | 0.036745359 | 2.155077861 | 0.02575006  | 0.036935079 |
| 0.024296673 | 2.104178914 | 1.079860299 | 1.075324886 | 2.10394705  |
| 1.354194435 | 1.355237077 | 0           | 0           | 0           |
| 0.467290099 | 2.212150303 | 0.422903812 | 0.257901734 | 0.476228862 |
| 0.106166714 | 0.106703863 | 1.330823983 | 0.071467508 | 0.107341788 |
| 9.257574645 | 2.11240559  | 0.024969356 | 2.690241456 | 1.688044674 |
| 1.949518043 | 0.098827837 | 1.950423231 | 0.066522077 | 0.099409579 |
| 0.023008853 | 0.023106406 | 2.098976283 | 3.416846306 | 0.023222046 |
| 5.680912433 | 0.24405442  | 0.224979286 | 0.150574842 | 0.245908232 |
| 5.706005361 | 6.377245793 | 0.016674903 | 2.068059117 | 6.339976584 |
| 2.764809823 | 3.861554622 | 0           | 1.965082308 | 3.655476163 |
| 6.956938048 | 0.0842633   | 2.338694987 | 1.867577903 | 0.084744981 |
| 6.101057712 | 4.061627643 | 2.024825673 | 0           | 4.264732318 |
| 2.559970997 | 0           | 0           | 1.565299414 | 0           |
| 7.418623658 | 0.098902891 | 0.092785026 | 1.911030425 | 0.099485161 |
| 2.578178137 | 0.152159477 | 0.141828477 | 1.417156903 | 0.153150203 |
| 0           | 0           | 4.394327098 | 1.386232866 | 0           |
| 0           | 0           | 1.196862091 | 2.563144481 | 0           |
| 0           | 0           | 1.046920455 | 0           | 0           |
| 1.515434052 | 0.174767861 | 1.520175144 | 1.469898218 | 0.175952253 |
| 3.287674672 | 0.891331782 | 2.425050704 | 1.458427475 | 0.89169805  |
| 3.681835298 | 0.117892721 | 0.110345414 | 3.223153781 | 0.118612969 |
| 0.077898299 | 0.078270673 | 0.073613648 | 1.229409066 | 0.078712627 |
| 6.792894515 | 0.020491653 | 0.019408957 | 1.659384429 | 0.020593585 |
| 2.050963846 | 1.038219151 | 2.863062131 | 2.36917413  | 1.038084271 |
| 1.901322415 | 1.225806274 | 2.710806384 | 2.593020089 | 1.60390374  |
| 0           | 0.920604699 | 0.919290842 | 0           | 0.920875059 |
| 0           | 0.965195469 | 0           | 1.545034234 | 0           |
| 0.030524951 | 2.13004476  | 1.705514547 | 0.021570643 | 1.704282411 |
| 0           | 0.979147513 | 0           | 0.979828168 | 0           |
| 0.120040457 | 0.120664279 | 2.023095886 | 1.340160382 | 0.121405374 |
| 7.028301648 | 8.55800771  | 0.094932409 | 1.290427827 | 7.920368915 |
| 1.632024996 | 0.011825821 | 1.039047837 | 1.036966932 | 0.011883458 |
| 0.572495477 | 0           | 3.636645634 | 2.173509362 | 0           |
| 2.409458828 | 7.875910961 | 0           | 2.065840386 | 8.214582005 |
| 5.303663407 | 8.627973991 | 0.032683654 | 1.708227415 | 8.49476906  |
| 3.021393746 | 6.070634623 | 3.852228748 | 0           | 6.378669875 |
| 0.084227584 | 0.084635474 | 0.079538079 | 0.057485888 | 0.08511965  |
| 0.91207941  | 0           | 1.512914708 | 0.477433428 | 0           |
| 2.708790835 | 0.09278973  | 2.705854844 | 1.268312187 | 0.093329386 |
| 5.841041849 | 3.947948313 | 1.166113659 | 0.035878148 | 5.748827032 |
| 3.025072173 | 9.001767714 | 1.017014258 | 1.016139343 | 9.523299653 |
| 1.464804786 | 0           | 0.901372837 | 1.472259171 | 0           |
| 5.577831348 | 3.536901162 | 2.302080297 | 1.194923663 | 4.521433062 |
| 3.057644056 | 0.75382694  | 1.961205497 | 0           | 1.277407587 |
| 6.088866884 | 1.477774354 | 0           | 3.104627917 | 1.900917045 |
| 7.443738714 | 6.166158628 | 0.054153236 | 1.783953463 | 5.709457096 |
| 0.947447514 | 0           | 2.729562536 | 0.949140866 | 0           |
| 0           | 0.978793232 | 0           | 0.979484779 | 0           |
| 8.26395934  | 8.922732533 | 0           | 0.898611261 | 9.50187294  |
| 1.584670907 | 2.52444794  | 0           | 3.15044755  | 2.130597654 |
| 6.06412983  | 9.367570511 | 2.172133822 | 1.124443007 | 10.36324956 |
| 5.551946788 | 5.501805595 | 2.29579526  | 0           | 6.32481514  |

| hsa-miR-518f-5p | hsa-miR-520g-3p | hsa-miR-520e-3p | hsa-miR-548d-3p | hsa-miR-516b-5p |
|-----------------|-----------------|-----------------|-----------------|-----------------|
| 1.34117288      | 0.111286462     | 0.1068058       | 0.073531722     | 0.112015878     |
| 0.071914943     | 0.071670393     | 0.068996012     | 0.048590559     | 0.072104128     |
| 0.034414971     | 0.034307027     | 0.033122695     | 0.023849393     | 0.034498437     |
| 0.017842037     | 0.017788155     | 1.058600557     | 1.055255918     | 0.017883692     |
| 0.121061307     | 0.120607667     | 0.115668319     | 1.339634764     | 0.121412472     |
| 0.050236314     | 1.159670492     | 1.161437273     | 0.034440212     | 0.0503625       |
| 0.163917087     | 0.163253194     | 0.156052482     | 1.442667989     | 0.164431309     |
| 0.021383535     | 0.021318424     | 0.02060325      | 1.065988296     | 2.417956209     |
| 0               | 0               | 0               | 1.911927199     | 0.928267302     |
| 1.150217955     | 1.150489026     | 0.045432467     | 2.766451697     | 0.047374119     |
| 0               | 0               | 0               | 1.079121178     | 0               |
| 0.232039815     | 0.230987873     | 0.219649468     | 0.141859039     | 0.232855374     |
| 0.111042036     | 0.110633795     | 0.106184771     | 0.073131003     | 0.111358016     |
| 0               | 0               | 0               | 3.783788635     | 0               |
| 0.195833109     | 0.194995664     | 0.185939021     | 2.162622913     | 0.196482043     |
| 0.042373699     | 0.042238419     | 0.040755188     | 2.483458439     | 1.134919273     |
| 0               | 0               | 0               | 1.713395688     | 1.672352315     |
| 2.526954759     | 2.182326117     | 0.362726216     | 0.36676198      | 2.048061097     |
| 1.887526761     | 2.663314123     | 0.077499734     | 1.855774333     | 2.326704628     |
| 0.252912548     | 0.251728411     | 0.238989889     | 0.152748284     | 0.253830867     |
| 0.180310248     | 0.179559026     | 0.171423295     | 2.895971544     | 0.180892242     |
| 0.301212548     | 0.299698445     | 0.283483908     | 0.17698442      | 1.832412767     |
| 1.090735601     | 1.695548829     | 1.091924107     | 1.086392281     | 0.028254101     |
| 2.916778872     | 4.45560242      | 3.42098209      | 0.096529361     | 5.361967073     |
| 1.444972037     | 1.445780039     | 0.141860247     | 0.095689878     | 2.112656517     |
| 0               | 0               | 0               | 0               | 0               |
| 0.979284943     | 0               | 0               | 2.780775265     | 1.972250661     |
| 0.062021485     | 0.0618149       | 0.059553743     | 1.183890246     | 0.062181279     |
| 0.085915257     | 0.08561462      | 0.082330949     | 1.248998813     | 0.086147872     |
| 0.039791498     | 0.039665184     | 1.128760536     | 1.725243649     | 0.039889173     |
| 0               | 0.945085222     | 0               | 0.960328312     | 0               |
| 0               | 0               | 0               | 2.321561275     | 0               |
| 0.548627649     | 0               | 0               | 0.550260932     | 2.074262154     |
| 1.288746647     | 1.288340125     | 0               | 0.76769813      | 2.44150362      |
| 0.097582336     | 0.097232846     | 0.093419521     | 0.06482919      | 0.097852794     |
| 2.511627153     | 0.284471748     | 0.269396453     | 2.358268489     | 2.985307771     |
| 0.128844141     | 0.128354255     | 0.123023974     | 1.358931796     | 0.129223405     |
| 0.817996898     | 0               | 0               | 0               | 1.358586218     |
| 0.084181891     | 0.083888348     | 0.08068167      | 0.056419284     | 0.084409012     |
| 0.021567125     | 0.021501427     | 0.020779818     | 1.066542578     | 0.021617915     |
| 0.101259328     | 0.100894042     | 0.096909674     | 2.347430481     | 1.310724549     |
| 0.066202363     | 0.065979903     | 0.063545876     | 1.810727493     | 0.066374446     |
| 1.388345753     | 0.127896587     | 1.392916978     | 1.357799145     | 1.387731104     |
| 2.849512221     | 4.191894232     | 0.057311571     | 1.177333286     | 5.462463922     |
| 0               | 0               | 0               | 1.9220163       | 0               |
| 1.89938963      | 1.492899453     | 0               | 0.927873982     | 1.899484354     |
| 2.164859282     | 0.164666078     | 1.495281733     | 0.105224206     | 0.165857361     |
| 0.19580834      | 0.194971035     | 0.185915889     | 1.514542443     | 0.196457165     |
| 0.115197099     | 0.114770203     | 0.110119608     | 1.955639918     | 0.115527535     |
| 0               | 0               | 0               | 1.832357974     | 0               |
| 0.002648511     | 0.002640796     | 0.002555912     | 1.008329767     | 1.00866322      |
| 0               | 0               | 0               | 1.857338284     | 0               |
| 0.054104682     | 0.053927483     | 0.051986624     | 1.161651886     | 1.170961936     |
| 0.021174872     | 0.021110428     | 0.020402561     | 0.014808716     | 0.021224694     |
| 0.014220621     | 0.014178037     | 0.013710007     | 2.378516984     | 0.014253539     |
| 9.746444317     | 9.426173119     | 8.390224354     | 1.711880655     | 9.753544619     |



|             |             |             |             |             |
|-------------|-------------|-------------|-------------|-------------|
| 0           | 0           | 0           | 0           | 0           |
| 0           | 0           | 0           | 0           | 0           |
| 0           | 0           | 0           | 0.712301371 | 1.218188079 |
| 0           | 0           | 0           | 1.570719443 | 0           |
| 0.035188349 | 0.035077787 | 0.033864821 | 1.709754346 | 0.035273838 |
| 0           | 0           | 0           | 0           | 0           |
| 0           | 0           | 0           | 0.691823232 | 0           |
| 0.009095344 | 0.009068435 | 0.008772562 | 0.00641467  | 0.009116143 |
| 0           | 0           | 0           | 0           | 0           |
| 0.066335768 | 0.066112797 | 0.063673212 | 0.044987823 | 0.066508246 |
| 1.193786948 | 1.194138054 | 1.196260611 | 1.182503997 | 1.193485402 |
| 0           | 0           | 0.985504499 | 0           | 0.985716088 |
| 3.558391167 | 4.220732388 | 2.560246344 | 0           | 4.060369303 |
| 0.582025573 | 0           | 0           | 0           | 0           |
| 0           | 0           | 0.930492764 | 1.915977474 | 0           |
| 0.056697019 | 0.056510295 | 0.054465571 | 2.799655757 | 0.05684144  |
| 0.204079343 | 0.203194694 | 0.193634811 | 1.532565703 | 0.204764933 |
| 3.179828376 | 4.402716984 | 2.331094573 | 0.001412258 | 4.010296412 |
| 0.36809087  | 0.366064012 | 0.344496047 | 1.846147823 | 0.369665357 |
| 0.009365598 | 0.009337872 | 0.009033019 | 0.006604021 | 1.030491596 |
| 0.32691548  | 0.32521202  | 0.307013994 | 2.437681746 | 0.328237948 |
| 0.014646964 | 0.01460306  | 0.014120533 | 0.010290029 | 1.047512724 |
| 0           | 0           | 0           | 4.517671054 | 0           |
| 2.368571575 | 1.28505988  | 0.08818229  | 1.265296656 | 1.284094465 |
| 0           | 0           | 0           | 2.906176357 | 0           |
| 0.856904158 | 0           | 0           | 0           | 0           |
| 0.047576778 | 0.047423145 | 0.045739446 | 0.032675763 | 1.150971707 |
| 0           | 0           | 0           | 0           | 0           |
| 0           | 0           | 0           | 0.873833543 | 0           |
| 0.069454951 | 0.069219969 | 0.066649679 | 1.20446433  | 0.069636727 |
| 2.368921045 | 2.369688749 | 2.832558443 | 0.14300718  | 2.836187868 |
| 0.151841552 | 0.151239542 | 0.144702857 | 2.054042801 | 2.921960019 |
| 0           | 0           | 0           | 0.687309204 | 0           |
| 0           | 0           | 0.742773698 | 1.281925409 | 0           |
| 1.808253554 | 0.95852755  | 1.294867417 | 1.618863226 | 1.577134191 |
| 0.031270979 | 0.031173588 | 1.101769931 | 1.696427487 | 1.707000004 |
| 0           | 0           | 0           | 0           | 0           |
| 1.590891759 | 0.001471442 | 0.001424275 | 2.005816677 | 2.006460976 |
| 0.069057714 | 0.068824269 | 0.066270704 | 0.046748839 | 0.0692383   |
| 0           | 1.844984867 | 0.884358433 | 1.452654767 | 0           |
| 0           | 0           | 0           | 1.72537967  | 0.784648003 |
| 0           | 0           | 0           | 2.54180593  | 0           |
| 0.070448905 | 1.221049828 | 0.067597827 | 1.207193222 | 0.070633667 |
| 0.38089404  | 0.378761567 | 0.356097639 | 0.214287976 | 2.016495261 |
| 0           | 2.116736246 | 0           | 1.418309895 | 0           |
| 0           | 0           | 0           | 0           | 0           |
| 0           | 0           | 0           | 0           | 0           |
| 0           | 0           | 0           | 0.422620564 | 0           |
| 1.084498254 | 0.026133623 | 0.025247468 | 2.099584935 | 0.026276734 |
| 0.004776734 | 0.004762747 | 0.004608897 | 1.01499057  | 0.004787544 |
| 1.091289565 | 0.028274373 | 0.027311087 | 0.019736789 | 1.091149889 |
| 2.281768168 | 2.496709694 | 2.027917723 | 1.346221476 | 2.849886894 |
| 7.072207402 | 7.962614197 | 7.035718744 | 0.646142215 | 7.813389083 |
| 0.113071879 | 0.112654555 | 0.108107373 | 0.074370617 | 1.344545814 |
| 0           | 0           | 0           | 0           | 0           |
| 0           | 0           | 0           | 1.337485038 | 0           |
| 0           | 0           | 0           | 2.529066523 | 0           |
| 3.321052258 | 2.455630288 | 1.475327848 | 1.483481962 | 2.865736195 |

|             |             |             |             |             |
|-------------|-------------|-------------|-------------|-------------|
| 0.062446636 | 0.062238448 | 0.059959829 | 3.237748125 | 0.062607671 |
| 0           | 0.610465146 | 0           | 2.027978145 | 0           |
| 4.621710697 | 2.017253801 | 1.366037453 | 2.729931777 | 3.08140735  |
| 0           | 0           | 0           | 0.91927414  | 0           |
| 7.818439328 | 8.144580313 | 6.84902408  | 1.231971283 | 8.119247744 |
| 0.036704723 | 0.036589006 | 0.035319639 | 0.025396297 | 0.036794202 |
| 0.024373755 | 0.024299027 | 0.023478425 | 0.017008129 | 1.680685416 |
| 0           | 0           | 0           | 2.481040196 | 0.548490974 |
| 0.470319949 | 0.467382301 | 0.436431227 | 0.252658712 | 0.472605466 |
| 0.106567367 | 0.106178942 | 0.101944184 | 1.302965608 | 0.106867991 |
| 0.026352761 | 0.026271599 | 0.025380493 | 0.018363949 | 0.026415511 |
| 0.098703348 | 0.098349063 | 0.0944838   | 1.28265911  | 0.098977521 |
| 0.023081633 | 0.023011076 | 0.022236194 | 2.412519685 | 0.023136181 |
| 0.243658605 | 0.242533849 | 0.230423693 | 0.147952624 | 0.244530759 |
| 4.549412888 | 6.466711298 | 5.043366692 | 0.012325526 | 5.819523199 |
| 1.54978007  | 1.549732409 | 1.549486903 | 0           | 0           |
| 0.084160202 | 0.083866748 | 0.08066103  | 2.295185965 | 0.084387255 |
| 2.233504896 | 4.061970858 | 3.694997925 | 0           | 4.005898733 |
| 0.982788117 | 0           | 0           | 0.98343357  | 0.982813816 |
| 0.098778289 | 1.304595766 | 0.094554942 | 0.065572674 | 1.303563148 |
| 0.15194764  | 0.151345095 | 0.144802668 | 0.097509673 | 0.152414269 |
| 0           | 0           | 0           | 1.681459414 | 0           |
| 0           | 0           | 0           | 2.377451151 | 0           |
| 0           | 0           | 0           | 1.069527841 | 0.583273386 |
| 0.174514702 | 0.173794791 | 0.165994032 | 1.466983442 | 0.175072394 |
| 0           | 0           | 0           | 0.8944354   | 1.45058914  |
| 0.117738637 | 0.11730021  | 0.112525084 | 0.07720846  | 0.118078011 |
| 0.07817607  | 0.077906779 | 0.074963465 | 0.052602159 | 0.078384411 |
| 0.020469815 | 0.020407618 | 0.019724395 | 2.078418252 | 0.020517899 |
| 0.011748593 | 0.011713615 | 0.011329109 | 0.008270546 | 0.01177563  |
| 0.714223844 | 1.901333478 | 0           | 2.190199402 | 0           |
| 0           | 0           | 0           | 0.923078945 | 0           |
| 0           | 0           | 0.964708662 | 1.545238554 | 0.965224263 |
| 1.098418219 | 1.098594707 | 0.029482727 | 0.021277063 | 1.098267431 |
| 0           | 0           | 0           | 2.295894886 | 0           |
| 0.120505741 | 0.120054656 | 0.115142879 | 1.338246912 | 0.120854927 |
| 8.828623666 | 7.849281064 | 4.98148512  | 1.915593093 | 7.075446457 |
| 0.011813472 | 0.011778296 | 0.011391609 | 2.045841362 | 0.011840663 |
| 0           | 0           | 0           | 0.575326789 | 0           |
| 6.738914601 | 7.066492265 | 6.725115937 | 1.818247501 | 7.290891404 |
| 8.305903276 | 6.442557832 | 7.137862627 | 0.023926102 | 5.634808958 |
| 4.973772114 | 5.254993824 | 4.215663711 | 0.965810701 | 6.15670128  |
| 0.084531842 | 0.084236871 | 0.081014684 | 2.296345634 | 0.08476007  |
| 0           | 0.477818856 | 0           | 1.275892847 | 0           |
| 1.286307085 | 0.092345534 | 0.088757446 | 0.061765919 | 0.092928593 |
| 2.815931898 | 3.947791067 | 2.546302    | 1.764315814 | 5.112718668 |
| 9.69444278  | 10.0131136  | 7.691995824 | 2.342611451 | 9.980115692 |
| 0           | 0           | 0           | 2.198135031 | 0           |
| 2.092092859 | 2.793089765 | 1.548333002 | 1.883720226 | 2.926034135 |
| 0           | 1.275967332 | 0           | 0.758040734 | 0           |
| 0           | 0           | 0           | 0.454163222 | 0.881353208 |
| 5.529916808 | 5.490935077 | 3.853504002 | 2.208552604 | 5.530204069 |
| 0           | 0           | 0           | 0           | 0           |
| 0           | 0           | 0           | 1.560825701 | 0           |
| 8.142250876 | 8.497577874 | 6.556806663 | 1.464520963 | 8.917317347 |
| 1.585150682 | 2.129326835 | 0.698173879 | 2.171698051 | 1.883238341 |
| 8.341958528 | 8.843716912 | 7.202137864 | 2.478274473 | 8.441496178 |
| 4.759354558 | 5.551934235 | 3.149735285 | 0           | 6.025127174 |

| hsa-miR-5010-3p | hsa-miR-7974 | hsa-miR-5586-5p | hsa-miR-516a-5p | hsa-miR-362-5p |
|-----------------|--------------|-----------------|-----------------|----------------|
| 1.98379792      | 0.072048393  | 2.439792827     | 0.112670113     | 7.151159247    |
| 1.85177148      | 1.20977125   | 3.650151626     | 0.07249277      | 5.435296325    |
| 2.960127599     | 1.104183002  | 4.629344955     | 2.473979985     | 5.384238597    |
| 3.542742483     | 0.012285087  | 3.896133609     | 0.017969184     | 6.36034994     |
| 2.013490221     | 1.337066717  | 5.627966602     | 0.122134498     | 7.328161764    |
| 0.043283148     | 0.033798991  | 2.540703127     | 1.777160779     | 5.203270642    |
| 0.136586921     | 0.102180479  | 0.157160925     | 0.165489414     | 6.789238859    |
| 2.680202676     | 1.661602152  | 4.194156683     | 3.426441408     | 6.880024102    |
| 2.222376387     | 0            | 3.472364243     | 0               | 6.479830655    |
| 3.797108275     | 3.768859343  | 3.92585034      | 0.047616279     | 6.466930455    |
| 1.708523527     | 3.28530843   | 6.402826033     | 0               | 6.19427572     |
| 2.33179198      | 0.138626179  | 2.364042201     | 1.660251999     | 8.276829799    |
| 1.339573482     | 0.071656908  | 1.343136        | 0.112007581     | 5.800095633    |
| 3.29562399      | 1.564655846  | 3.878717324     | 0.982099324     | 6.852934021    |
| 0.161692822     | 3.616865993  | 4.377319331     | 0.197818125     | 8.986054488    |
| 2.993452778     | 0.028667823  | 2.508063137     | 2.177309215     | 6.970271411    |
| 2.123221635     | 1.963817664  | 6.15351497      | 1.038309914     | 5.134380284    |
| 2.32704086      | 0.368182857  | 3.526619339     | 3.358823475     | 5.086105623    |
| 1.882256339     | 0.05324435   | 3.953721073     | 4.466733919     | 5.81464653     |
| 2.385684861     | 2.282888092  | 3.753197923     | 0.255723609     | 5.772806029    |
| 0.149539491     | 0.111232724  | 4.197126544     | 0.182090161     | 8.160771477    |
| 2.504335997     | 1.720346106  | 1.840251025     | 1.829140929     | 7.426908881    |
| 1.091622345     | 0.019263621  | 2.447736307     | 4.047085463     | 7.157382751    |
| 0.125703926     | 1.40740108   | 3.952073625     | 5.753524195     | 6.452330704    |
| 0.124550579     | 1.404016278  | 4.441374389     | 0.150210305     | 6.02084321     |
| 2.133179637     | 0            | 1.202702907     | 0               | 5.873645291    |
| 2.777797838     | 2.296304507  | 4.359471096     | 2.776681291     | 6.931544367    |
| 1.81735211      | 0.041385018  | 4.098703326     | 0.062509487     | 6.814891672    |
| 3.360001166     | 0.056391495  | 1.907039003     | 0.086625851     | 6.936809861    |
| 2.163351454     | 0.026970222  | 1.740308133     | 0.040089716     | 7.109944983    |
| 2.480982176     | 0.962815834  | 3.93864846      | 0               | 4.156874191    |
| 1.584601952     | 2.321564435  | 3.699981611     | 0               | 7.128796381    |
| 2.823627571     | 0            | 3.284720526     | 3.01313683      | 5.179309658    |
| 2.235246972     | 0            | 6.335537157     | 2.44206911      | 6.327315558    |
| 4.412245624     | 1.902633761  | 4.138623213     | 0.098408645     | 8.712451195    |
| 2.923919679     | 1.691865732  | 5.728763737     | 3.625386375     | 8.168122762    |
| 0.108460209     | 0.082168239  | 4.014421708     | 0.130003312     | 6.566311626    |
| 4.237181761     | 0.822974143  | 3.610158409     | 0               | 8.726721822    |
| 2.661425902     | 1.242663022  | 1.901004025     | 0.084875687     | 6.990800248    |
| 3.269098552     | 1.662241098  | 3.426709463     | 0.021722164     | 7.031693068    |
| 2.722449955     | 1.91317192   | 3.242640192     | 0.102123063     | 6.725817988    |
| 2.594607186     | 0.044046504  | 2.875620948     | 0.066727921     | 6.801784936    |
| 0.108087631     | 1.355055788  | 3.717038358     | 0.129538341     | 5.535968968    |
| 2.569653584     | 1.78844776   | 5.240841791     | 4.749112315     | 7.525832609    |
| 2.233744574     | 0.93869583   | 4.219932162     | 0               | 7.621225009    |
| 1.900835049     | 0            | 2.215878667     | 2.475999991     | 4.522001749    |
| 0.137713962     | 3.711662873  | 5.509759631     | 0.166927332     | 6.184928194    |
| 2.683961767     | 2.156810425  | 3.951623533     | 0.197793022     | 7.362782842    |
| 2.435187895     | 0.074132355  | 4.316000139     | 0.11620687      | 5.529741695    |
| 2.610027657     | 1.429322724  | 4.303455644     | 0               | 6.231037192    |
| 3.472087466     | 0.001843953  | 4.101033448     | 2.334057399     | 6.406522755    |
| 1.824433997     | 0            | 4.761935755     | 0               | 7.565907549    |
| 0.046562132     | 0.036302793  | 5.391441012     | 0.054523186     | 5.515950387    |
| 2.414181794     | 0.014544789  | 3.272055835     | 0.021326952     | 7.39635267     |
| 3.065600296     | 0.009817339  | 4.071509362     | 0.014321097     | 6.582844443    |
| 2.823167902     | 1.7138038    | 4.14493653      | 9.918102621     | 6.293039428    |

|             |             |             |             |             |
|-------------|-------------|-------------|-------------|-------------|
| 1.434577128 | 1.467407802 | 4.239963862 | 0           | 5.513604815 |
| 0.864358343 | 0           | 0.864843342 | 0.867109228 | 7.472794188 |
| 3.232375876 | 2.906409888 | 3.593932162 | 1.219218459 | 5.185460085 |
| 2.65215855  | 3.608856751 | 2.916254675 | 1.173807867 | 6.695674387 |
| 1.720500134 | 1.708789612 | 3.870919329 | 2.477266245 | 5.794043169 |
| 2.09093361  | 0           | 3.063508897 | 0           | 6.024315285 |
| 3.083080338 | 0           | 3.922724031 | 0           | 4.970569591 |
| 3.042272156 | 0.006302549 | 3.504651063 | 0.009158826 | 6.156770074 |
| 2.963123957 | 3.667285    | 3.545363706 | 0           | 5.48170943  |
| 2.595113192 | 0.044131174 | 4.311479643 | 0.066862534 | 7.676227757 |
| 2.845023233 | 0.041067572 | 3.083587423 | 0.062008004 | 8.170006841 |
| 0.985510881 | 0           | 3.300057938 | 2.786196383 | 5.298596074 |
| 1.977546464 | 0           | 4.496491453 | 5.495694053 | 7.999690139 |
| 2.634345469 | 0.585731575 | 4.601252108 | 0           | 6.656416569 |
| 1.500609541 | 3.716836217 | 6.24560691  | 0           | 5.61405608  |
| 3.418203119 | 1.167863418 | 3.585428846 | 0.057138047 | 6.139564656 |
| 0.168105426 | 0.124034497 | 2.743519579 | 2.279139564 | 7.799612571 |
| 2.330833338 | 0.001387863 | 5.682852074 | 5.711073693 | 3.595081218 |
| 2.656255337 | 0.203246277 | 0.347767626 | 0.372917796 | 6.000216858 |
| 1.030891723 | 2.35915438  | 2.364659105 | 1.030382248 | 8.63870914  |
| 0.260192273 | 0.184720227 | 2.618270787 | 0.33096757  | 6.376198536 |
| 3.237960815 | 2.643610145 | 3.393746246 | 0.014750557 | 5.777275204 |
| 0           | 2.359667648 | 3.967458355 | 0           | 6.934993403 |
| 1.919886783 | 0.060177868 | 2.705744706 | 1.925029435 | 6.526223427 |
| 2.895649688 | 2.232268233 | 2.48030204  | 0.928928309 | 7.118745354 |
| 2.378263325 | 0           | 4.288892604 | 0           | 5.184993306 |
| 1.765870694 | 0.032069717 | 2.798250873 | 1.767410967 | 5.366565736 |
| 2.78154086  | 0.982669612 | 4.829087051 | 1.562827315 | 6.236979025 |
| 4.047823115 | 0           | 2.392808317 | 0           | 6.812906489 |
| 2.606899747 | 1.203080848 | 3.779116918 | 0.070010134 | 5.695577595 |
| 2.337492397 | 1.59084018  | 3.182903567 | 0.236745176 | 5.272846604 |
| 2.107712182 | 1.411102202 | 4.098212914 | 1.450759434 | 7.574911873 |
| 1.858838188 | 0           | 3.169323862 | 0.684779593 | 6.95396221  |
| 1.65087555  | 1.98500717  | 2.19948991  | 0           | 5.963703726 |
| 3.60321116  | 0           | 4.267282917 | 6.462093396 | 7.424138387 |
| 0.02709684  | 0.021324305 | 2.461013185 | 0.031500866 | 6.091366074 |
| 1.545176965 | 0           | 3.756451703 | 1.956504405 | 6.054880312 |
| 2.006348548 | 0.001028321 | 4.59261274  | 2.591943456 | 6.694440407 |
| 4.002019318 | 0.045855366 | 5.457493336 | 0.069609259 | 6.748210084 |
| 2.640808171 | 1.453504368 | 5.51230925  | 1.444283882 | 5.873882684 |
| 2.83946451  | 0.789612552 | 4.16273363  | 0           | 6.590361014 |
| 0.965683762 | 0.967529474 | 2.948998987 | 0           | 5.94413118  |
| 1.221833017 | 1.205787938 | 2.622181718 | 0.071013213 | 5.627579506 |
| 3.144154635 | 0.208840796 | 4.103328508 | 2.012561638 | 8.22840107  |
| 1.407571157 | 1.822824545 | 1.406142403 | 0.857800172 | 5.823595825 |
| 0.91623454  | 1.899266852 | 2.874411154 | 0           | 5.884482215 |
| 1.816405317 | 0           | 5.554901469 | 0           | 7.089325293 |
| 3.407921888 | 2.248583883 | 3.65871948  | 0.840939989 | 5.978971261 |
| 3.118870987 | 0.017941054 | 1.688601195 | 0.026404823 | 6.457847046 |
| 1.603974576 | 1.014905869 | 3.931171588 | 0.004809728 | 7.195542558 |
| 3.128222198 | 0.01938107  | 4.664898622 | 2.448071284 | 6.053126791 |
| 2.033807757 | 0           | 5.588458029 | 4.053192849 | 6.73669187  |
| 2.598789208 | 0           | 4.179525285 | 8.325413918 | 7.403058172 |
| 2.428100237 | 1.317162969 | 3.659561177 | 0.114058956 | 8.392884275 |
| 0.359534681 | 0           | 0.758244536 | 0           | 5.63598293  |
| 0.7871067   | 0.79595089  | 5.31790318  | 0           | 5.367371278 |
| 2.932941852 | 0.677506795 | 5.509992797 | 0           | 6.940081727 |
| 0.910700502 | 0           | 4.250429628 | 2.456001474 | 6.062074232 |

|             |             |             |             |             |
|-------------|-------------|-------------|-------------|-------------|
| 2.58029688  | 0.041656366 | 0.060313054 | 1.195536476 | 6.99575252  |
| 1.743190426 | 0.615285655 | 3.955418145 | 0           | 6.453895357 |
| 1.361678656 | 0.076343764 | 1.365771761 | 4.111556687 | 6.699812873 |
| 2.421575115 | 0.474565802 | 3.279910049 | 0.475403891 | 3.766884442 |
| 1.877922331 | 1.230364038 | 2.657833236 | 8.662099144 | 8.34099905  |
| 2.15123001  | 0.024932739 | 3.635346913 | 0.036977905 | 5.859209174 |
| 0.021164311 | 0.016703478 | 3.704262941 | 2.430813069 | 6.126445096 |
| 1.353469915 | 0           | 3.511150501 | 3.011736535 | 5.382514836 |
| 0.360151636 | 0.245899592 | 0.441090446 | 0.477336488 | 7.660131118 |
| 1.967315503 | 0.068975769 | 1.977669066 | 0.10748594  | 6.565551576 |
| 1.08578204  | 1.678786628 | 1.08596118  | 1.687966515 | 6.202491424 |
| 1.941747794 | 1.280616305 | 3.898691444 | 0.099541019 | 5.103515975 |
| 2.687529284 | 0.015832716 | 4.202359825 | 0.023248145 | 6.07411224  |
| 0.198470289 | 0.144547301 | 5.040853463 | 0.246328035 | 6.880609453 |
| 2.398882151 | 1.648294504 | 2.890558945 | 4.845536717 | 6.535254382 |
| 2.766427392 | 0           | 0.971021073 | 3.655481472 | 5.930112602 |
| 2.930993096 | 0.055305827 | 1.264393076 | 1.259960809 | 5.571551125 |
| 2.59225962  | 1.146479721 | 5.085594982 | 4.484173492 | 7.179741733 |
| 3.781848915 | 0           | 5.059928665 | 0.982874546 | 8.657994441 |
| 3.211400238 | 1.28080948  | 3.430660416 | 1.302405033 | 8.237555118 |
| 2.891150189 | 0.095451681 | 4.553562429 | 0.153374231 | 7.703059611 |
| 3.139401756 | 1.02807646  | 3.368215385 | 0           | 6.466198616 |
| 2.690777439 | 1.219378645 | 4.119172508 | 1.202728091 | 6.929892881 |
| 2.768230013 | 0           | 3.082280729 | 0           | 5.870064527 |
| 2.174023425 | 2.106098556 | 3.273280495 | 0.176220169 | 8.174210325 |
| 0.889606788 | 0.894958013 | 5.575840617 | 1.450978845 | 5.650359963 |
| 2.00301111  | 1.95932281  | 3.677261898 | 0.118775751 | 5.292912526 |
| 3.656339222 | 0.051584538 | 1.879961217 | 0.078812452 | 6.159300428 |
| 1.06693588  | 0.014067658 | 3.097831598 | 0.020616589 | 5.498492679 |
| 3.514794819 | 0.008125356 | 2.863372648 | 0.011831116 | 7.338512863 |
| 2.157436597 | 1.24340448  | 5.525578099 | 1.902945316 | 5.902824547 |
| 1.487125712 | 0.92347244  | 2.208788408 | 0           | 8.987840473 |
| 1.953984012 | 0           | 2.27268973  | 0           | 7.697010921 |
| 2.94400004  | 0.02089225  | 2.724985726 | 1.70419187  | 5.857586467 |
| 2.29331395  | 0           | 2.554663564 | 0           | 7.222866951 |
| 2.788586738 | 0.07727539  | 4.702899023 | 0.121572874 | 8.536173036 |
| 1.311336838 | 0.065673406 | 2.739602893 | 7.687091132 | 6.920549756 |
| 2.638274786 | 0.00816984  | 3.227610547 | 0.011896463 | 5.790156374 |
| 2.871344236 | 0           | 3.159505875 | 0           | 7.041004698 |
| 2.239734798 | 1.142648772 | 4.996104688 | 7.786065939 | 5.892531112 |
| 3.616769392 | 1.10451427  | 4.926033727 | 7.071950394 | 7.472247074 |
| 1.288474129 | 2.410124121 | 3.94734235  | 5.383697586 | 4.899116616 |
| 2.662699649 | 0.055535938 | 4.388283471 | 1.261048913 | 6.692238295 |
| 1.752614224 | 0           | 4.304668746 | 0.480588832 | 6.089272906 |
| 2.358502537 | 1.888425801 | 0.089312517 | 0.093451305 | 6.273518916 |
| 2.209116034 | 1.153679861 | 3.237515774 | 4.712641602 | 5.958273825 |
| 0.004474602 | 0.003560375 | 4.348221549 | 10.21233996 | 6.969957162 |
| 2.6662675   | 0           | 3.546657338 | 0           | 6.140720625 |
| 2.498067915 | 0           | 4.088165383 | 4.680246114 | 6.531064117 |
| 2.220113112 | 1.293053118 | 4.33722838  | 0           | 6.462234554 |
| 2.632144    | 0           | 2.717008611 | 1.90132908  | 5.705287428 |
| 1.182397622 | 0.038403553 | 3.588324535 | 5.139293835 | 6.117505634 |
| 1.520582311 | 2.518320497 | 4.722955105 | 0           | 6.082876768 |
| 2.96938202  | 0.979678268 | 3.966654129 | 0           | 7.231675252 |
| 4.010753613 | 1.465301643 | 5.151226146 | 9.607028172 | 6.146742115 |
| 2.850489447 | 1.227939056 | 3.405428726 | 1.586564935 | 5.961452318 |
| 2.167783894 | 1.123084489 | 1.744570533 | 9.418063001 | 5.821710434 |
| 2.519518469 | 1.756990524 | 4.001950246 | 8.144913808 | 7.116320043 |

| hsa-miR-4791 | hsa-miR-548y | hsa-miR-1323 | hsa-miR-454-5p | hsa-miR-519d-3p |
|--------------|--------------|--------------|----------------|-----------------|
| 0.06810559   | 0.076622913  | 0.110064091  | 1.330795339    | 0.110086664     |
| 0.045170871  | 0.050527077  | 0.070942506  | 2.271806555    | 0.070955959     |
| 0.022253606  | 0.02474769   | 0.03398539   | 1.713113364    | 0.033991339     |
| 0.011690176  | 1.055896111  | 0.017627526  | 2.396634122    | 1.655844574     |
| 0.073312128  | 0.082588237  | 0.11925941   | 1.994839637    | 0.119284303     |
| 2.504567049  | 0.035769765  | 0.049587206  | 1.156599975    | 0.049596191     |
| 2.06698294   | 0.109080504  | 0.161282606  | 0.120373117    | 0.161318954     |
| 1.659994692  | 0.015503831  | 0.021124344  | 1.06835322     | 1.069571976     |
| 2.233804255  | 0            | 0            | 2.226185782    | 0               |
| 0.030251067  | 0.033710167  | 0.046649492  | 2.184209838    | 0.046657892     |
| 1.759024774  | 1.074647835  | 0            | 1.96882826     | 0.587705066     |
| 1.571849388  | 0.148655308  | 0.227872035  | 1.626655946    | 0.227929419     |
| 1.932017729  | 3.574499661  | 0.109420103  | 1.329028484    | 0.109442516     |
| 1.565055337  | 0            | 0            | 2.298264976    | 0               |
| 1.498086354  | 0.127991471  | 0.192512369  | 0.141750471    | 0.192558141     |
| 0.027229135  | 0.03031933   | 1.135960034  | 2.166217799    | 1.135950691     |
| 2.187752536  | 1.951719978  | 0            | 2.636715673    | 0.567638287     |
| 2.296184356  | 0            | 3.41558288   | 0.35943889     | 1.5395973       |
| 1.229208023  | 0.056489704  | 3.16414789   | 0.061711439    | 1.25308942      |
| 1.612384522  | 2.30563687   | 0.248223315  | 0.178509736    | 0.248287837     |
| 0.104705906  | 0.118877891  | 0.177330345  | 2.603364799    | 0.177371439     |
| 0.16156449   | 0.185984805  | 0.295223513  | 1.77483239     | 0.295305795     |
| 1.084388265  | 0.02034859   | 0.027839731  | 1.690694343    | 1.6958689       |
| 2.033632582  | 0.100779948  | 3.426170923  | 2.078926573    | 4.098367432     |
| 1.39506908   | 0.099896562  | 1.447644527  | 3.542375014    | 0.146523551     |
| 1.61716473   | 0            | 0            | 1.211002544    | 0.697488309     |
| 0            | 0            | 1.972138247  | 1.973673055    | 0               |
| 2.216471103  | 0.043840881  | 0.061199837  | 0.047776201    | 0.061211207     |
| 0.05339678   | 0.059852713  | 0.084720167  | 2.319263089    | 0.084736694     |
| 0.025621614  | 0.028517679  | 0.039288871  | 2.156611475    | 0.039295831     |
| 0.508926802  | 1.307951877  | 0            | 1.816449086    | 0               |
| 1.58463659   | 0            | 0.999702475  | 1.584612745    | 0               |
| 1.032705778  | 0            | 0.546242076  | 1.366993353    | 1.005098899     |
| 0.771525091  | 0            | 0.761952165  | 2.464399674    | 0               |
| 0.060121921  | 0.067505268  | 0.096193402  | 0.073902289    | 0.096212603     |
| 0.154825739  | 2.819453723  | 1.801165472  | 0.198927502    | 3.339604766     |
| 0.07758665   | 0.087497062  | 0.126898612  | 1.376355036    | 0.126925482     |
| 0            | 1.36841878   | 1.35727006   | 1.76037073     | 0               |
| 0.052387663  | 0.058706634  | 0.083014957  | 1.254999193    | 0.083031095     |
| 0.014088804  | 0.015635119  | 0.021305599  | 1.666503629    | 0.021309223     |
| 1.281339774  | 0.069895077  | 0.099807739  | 2.369523428    | 0.099827804     |
| 0.041764288  | 0.046676246  | 0.065317655  | 2.251982184    | 1.209170307     |
| 0.077335418  | 0.087208266  | 0.126447358  | 2.016383435    | 0.12647411      |
| 0.037835199  | 2.220205885  | 1.813260076  | 1.184527176    | 2.579590524     |
| 0            | 0            | 0            | 2.237146052    | 0               |
| 1.501429448  | 2.900158615  | 2.215904468  | 2.483401195    | 1.899065147     |
| 0.097014661  | 2.098257456  | 2.166728458  | 2.561976973    | 0.162710319     |
| 0.112504142  | 0.127977054  | 2.259240442  | 2.201107947    | 0.192533919     |
| 1.315742868  | 3.740216264  | 0.113501208  | 1.340195184    | 0.113524641     |
| 0.871532821  | 2.145759617  | 0            | 1.824746829    | 0               |
| 1.594505171  | 0.001943397  | 1.595638594  | 1.008608419    | 0.002618211     |
| 0            | 0            | 0            | 2.800820122    | 0               |
| 2.517488256  | 2.794776342  | 0.053399788  | 1.168100577    | 0.053409545     |
| 0.013836899  | 0.015354576  | 0.020918334  | 1.067698686    | 0.020921888     |
| 1.043216223  | 0.010357554  | 0.014051078  | 3.062297122    | 0.014053427     |
| 1.323098443  | 2.849938282  | 9.264365936  | 1.307961076    | 9.362917498     |

|             |             |             |             |             |
|-------------|-------------|-------------|-------------|-------------|
| 2.425577617 | 0           | 0           | 1.446584756 | 0           |
| 0           | 0           | 0.865668501 | 2.810451951 | 1.418641434 |
| 1.240991394 | 0.710127885 | 0.706482408 | 1.222695888 | 0           |
| 2.71085822  | 0           | 0           | 2.31995261  | 0           |
| 1.706114635 | 1.108413897 | 2.745364436 | 1.715874492 | 2.477909102 |
| 1.8002086   | 0.839085958 | 0           | 0           | 0           |
| 1.215313599 | 0.689564067 | 0           | 0           | 0           |
| 2.034347796 | 0.006646313 | 0.008988199 | 2.624296405 | 0.008989684 |
| 3.289840334 | 0           | 0           | 0           | 0           |
| 1.190867978 | 0.04676648  | 0.065449031 | 1.20396944  | 0.065461301 |
| 1.177897757 | 0.043502825 | 0.060710212 | 2.235542323 | 0.06072148  |
| 2.30468491  | 0           | 0.9856076   | 0.985786991 | 0.985608598 |
| 0.983937115 | 3.436740625 | 3.558432282 | 1.978351686 | 2.9743329   |
| 0.589705749 | 0           | 0           | 1.055063452 | 0           |
| 2.499499511 | 2.716372336 | 0           | 0.931636633 | 0           |
| 2.199389862 | 0.040208886 | 0.055954276 | 2.218378209 | 0.055964557 |
| 0.116600092 | 0.132769734 | 0.200572094 | 3.003234366 | 0.200620425 |
| 2.329750236 | 0.001462624 | 4.010265887 | 1.592677141 | 4.33228244  |
| 1.813783831 | 0.21964871  | 0.360086592 | 0.247457879 | 0.360196327 |
| 1.618384826 | 0.006842613 | 0.0092552   | 1.620898273 | 0.00925673  |
| 1.745748806 | 0.199189942 | 0.320181605 | 1.82648362  | 0.320274045 |
| 1.044491429 | 0.010665179 | 0.014472165 | 1.640803101 | 0.014474587 |
| 2.105783709 | 4.512680482 | 0.828195988 | 2.346005775 | 0           |
| 1.258137733 | 0.063902314 | 1.286287534 | 0.069909295 | 0.090790545 |
| 0.932272718 | 3.603275432 | 0           | 3.221225785 | 0           |
| 0.863218147 | 0           | 0.856052853 | 2.386294724 | 0           |
| 0.030448689 | 2.771239191 | 0.046965542 | 0.036906863 | 1.152126763 |
| 0           | 2.976174333 | 0           | 1.563489228 | 0           |
| 0.876190833 | 0           | 0.869511267 | 2.146527448 | 0           |
| 1.199208836 | 1.207212772 | 0.068520514 | 1.833456083 | 0.068533442 |
| 0.131152765 | 0.149872339 | 0.229996121 | 0.166670919 | 1.673150932 |
| 1.401954393 | 0.10174681  | 0.149451977 | 2.083340915 | 0.149484959 |
| 1.595126477 | 0           | 0           | 1.872165046 | 0           |
| 2.823807092 | 2.956360948 | 0           | 1.967370229 | 0           |
| 0.519064422 | 0           | 0.956471342 | 2.66024486  | 0.956504736 |
| 0.0202709   | 0.022531353 | 1.101074691 | 1.099094639 | 0.030888737 |
| 0           | 0           | 0           | 0           | 0           |
| 2.005640548 | 0.001083663 | 1.004867845 | 1.590680055 | 1.590917636 |
| 1.19814954  | 0.048604375 | 1.217814176 | 1.832143903 | 0.068142226 |
| 0.891265234 | 3.929298847 | 0.885198354 | 2.168223388 | 0           |
| 0.792265636 | 0           | 0           | 1.713902209 | 0           |
| 0           | 0           | 0           | 2.53931142  | 0           |
| 0.044299438 | 1.827962052 | 0.069499155 | 2.596475213 | 0.069512295 |
| 0.194657338 | 0.225843207 | 0.37247532  | 0.254725689 | 0.372590689 |
| 2.622851657 | 0           | 0           | 1.813506108 | 0           |
| 2.22031588  | 0           | 0           | 1.485987619 | 0           |
| 1.834521662 | 0           | 0           | 1.822156048 | 0           |
| 0.428326441 | 0           | 0           | 2.709183648 | 0.421397054 |
| 0.017061303 | 0.018948283 | 0.025893077 | 1.083439476 | 0.025897527 |
| 1.014665641 | 0.003500227 | 0.004721035 | 3.480969193 | 0.004721807 |
| 0.018427704 | 0.020472965 | 0.028012857 | 0.022209495 | 1.091844583 |
| 1.35159636  | 0           | 1.72136587  | 1.337726525 | 1.72137577  |
| 1.157385142 | 0           | 6.901957346 | 0.639131842 | 7.020259476 |
| 0.068874139 | 0.077502513 | 0.111413935 | 2.739770109 | 0.111436845 |
| 0.374897363 | 0           | 0.369247095 | 0.361889429 | 0           |
| 1.343016799 | 0           | 0           | 1.722766312 | 0           |
| 0.681029452 | 0           | 0           | 1.554130298 | 0.670663935 |
| 1.486023083 | 4.78588977  | 1.880601745 | 0           | 1.880605475 |

|             |             |             |             |             |
|-------------|-------------|-------------|-------------|-------------|
| 1.180393699 | 0.04412987  | 1.197787515 | 2.567845588 | 0.061630077 |
| 1.491515915 | 0           | 0           | 0.60673468  | 0           |
| 0.072132297 | 3.006962036 | 3.081373466 | 0.089168581 | 3.081383955 |
| 2.362138876 | 0           | 0           | 0.904988272 | 0           |
| 0.049684737 | 2.882523383 | 7.987737665 | 1.866460674 | 7.720286371 |
| 1.108904829 | 0.026356349 | 0.036244229 | 2.471579757 | 0.036250606 |
| 2.414174275 | 0.017638395 | 1.681208835 | 1.077706585 | 1.079140797 |
| 1.691925094 | 0           | 0.54554261  | 2.286984681 | 1.352487169 |
| 0.228392837 | 0.267063826 | 2.217624546 | 0.30347969  | 2.217592472 |
| 0.065222901 | 0.073326647 | 0.105024008 | 1.95125074  | 0.105045338 |
| 1.676797227 | 4.197514293 | 1.688832932 | 1.08386989  | 2.112764455 |
| 2.656561398 | 0.06823496  | 1.305685972 | 1.295424003 | 0.097314855 |
| 1.069480983 | 0.016717006 | 0.022800773 | 1.672071819 | 0.022804664 |
| 0.135595811 | 0.155116973 | 0.239203552 | 1.652542268 | 0.23926487  |
| 0.011521046 | 0.012777125 | 5.177927306 | 2.395565562 | 5.818867779 |
| 1.553206305 | 0           | 1.549623201 | 0.971530281 | 2.956796447 |
| 1.856807866 | 0.058692278 | 0.082993619 | 2.6442052   | 0.083009753 |
| 0           | 2.279717079 | 3.376399265 | 2.448815458 | 3.760102776 |
| 0.98378153  | 0           | 0           | 0.982896201 | 0           |
| 0.06080477  | 0.068283707 | 0.097369059 | 1.927286112 | 0.09738854  |
| 2.471593053 | 0.101811678 | 0.149555949 | 0.112196054 | 0.149588959 |
| 1.035000186 | 0           | 0           | 2.73310301  | 0           |
| 0           | 0           | 0           | 2.141924623 | 0           |
| 1.747739359 | 0           | 0           | 1.956660045 | 0           |
| 1.452444359 | 0.115434738 | 0.171658622 | 1.491915191 | 0.171698015 |
| 1.46212921  | 0           | 1.449816276 | 1.859141593 | 0.890617328 |
| 0.071472651 | 0.080478945 | 0.115997038 | 0.088325711 | 0.1160211   |
| 0.048870967 | 0.054717118 | 0.077105402 | 2.623574775 | 0.077120212 |
| 1.061791171 | 1.660076785 | 0.020222219 | 3.259240318 | 0.020225649 |
| 1.035799146 | 0.008570578 | 0.011609328 | 1.629911071 | 0.011611258 |
| 0           | 0           | 0           | 2.386892036 | 1.601352731 |
| 0.924596068 | 0           | 0           | 1.897742069 | 0           |
| 1.546278288 | 0           | 0           | 1.955603274 | 0           |
| 1.691054936 | 0.022073607 | 1.705191483 | 2.447845517 | 0.030249403 |
| 1.561858762 | 0           | 0           | 1.560200131 | 0           |
| 0.073005171 | 0.082236124 | 0.118713969 | 1.354354535 | 0.118738723 |
| 1.904743713 | 0.069786725 | 7.938556772 | 2.368985673 | 6.962523016 |
| 1.626974413 | 0.00861755  | 0.011673416 | 2.858869144 | 0.011675357 |
| 0           | 0           | 0           | 1.043014035 | 0           |
| 0.64445892  | 0           | 6.397497985 | 1.127825274 | 6.699324697 |
| 3.132118042 | 2.722821498 | 6.818821225 | 2.463131671 | 6.601168693 |
| 1.333527588 | 1.314216834 | 4.687704778 | 2.516278257 | 4.716480733 |
| 1.238792381 | 0.05893821  | 0.083359237 | 1.882432449 | 0.083375454 |
| 0.484130707 | 0.475773472 | 0           | 1.53616199  | 0           |
| 1.259678644 | 0.064298987 | 0.091367769 | 1.278757001 | 0.091385833 |
| 0.032949757 | 0.036742675 | 4.249080827 | 2.794925369 | 4.155333328 |
| 0.003391334 | 3.021815675 | 8.866311282 | 2.343780382 | 9.275034796 |
| 1.883577758 | 0           | 1.868127423 | 2.191729084 | 0           |
| 0           | 0.680610985 | 2.300822471 | 1.184592774 | 2.646761812 |
| 0           | 0           | 0           | 0.752297752 | 0           |
| 0.45985488  | 5.595654668 | 1.206379611 | 0.878935909 | 0.877417335 |
| 1.166585735 | 0.040666908 | 3.589938273 | 2.549362273 | 5.186209931 |
| 1.937871149 | 0           | 0           | 1.522385378 | 0           |
| 1.975083316 | 0           | 0           | 2.293994992 | 0           |
| 0.900922907 | 3.028317774 | 7.157129393 | 0           | 8.11153335  |
| 0           | 0           | 1.881607607 | 2.720627681 | 0           |
| 1.724780593 | 0.029309811 | 8.661058938 | 1.128604919 | 8.124636828 |
| 0           | 2.321853283 | 4.842710061 | 0           | 5.670308791 |



| hsa-miR-338-3p | hsa-miR-200c-3p | hsa-miR-3682-3p | hsa-miR-376a-2-5p | hsa-miR-9-3p |
|----------------|-----------------|-----------------|-------------------|--------------|
| 11.4931023     | 6.843768889     | 2.433760012     | 0.064628213       | 2.439172895  |
| 13.30622302    | 7.235445696     | 2.893225972     | 1.201971592       | 1.857777287  |
| 9.493155422    | 6.008796119     | 3.482844223     | 0.021218076       | 2.741342114  |
| 10.67662503    | 7.406976756     | 3.671110394     | 0.011158717       | 4.613415202  |
| 11.6469248     | 12.19115435     | 2.021988749     | 2.976522594       | 3.085655449  |
| 8.923190568    | 6.229132268     | 3.933148975     | 0.030559688       | 2.209661211  |
| 10.16883257    | 6.555772954     | 2.156040145     | 0.091102981       | 1.491519879  |
| 11.0412019     | 6.82618217      | 1.669617932     | 1.063430465       | 4.106070271  |
| 11.13980239    | 7.586655403     | 3.212659227     | 0.932862791       | 0            |
| 10.59467146    | 7.648961851     | 3.920217455     | 0.028819076       | 1.768222958  |
| 10.95066485    | 7.983556001     | 1.056004236     | 0                 | 6.163261838  |
| 9.620345855    | 8.522389747     | 3.155090073     | 1.558597065       | 4.910621187  |
| 10.77929255    | 5.210406252     | 2.43148862      | 0.06428218        | 1.343504947  |
| 11.50291534    | 11.57416467     | 4.220202954     | 0.983303673       | 2.97304448   |
| 11.59428297    | 8.708568101     | 2.704552868     | 0.106299872       | 0.185187676  |
| 14.80165847    | 8.017311793     | 4.448393975     | 0.025948443       | 0.040630454  |
| 10.0062113     | 6.596200379     | 2.731072144     | 2.835591205       | 2.844188182  |
| 8.577059904    | 7.567914        | 2.049450258     | 2.169034231       | 1.318818547  |
| 9.419216378    | 5.973908449     | 1.254894385     | 1.841358953       | 0.077243306  |
| 10.70374064    | 7.354010369     | 3.491863519     | 0.131820883       | 3.23498091   |
| 11.47270586    | 6.615553092     | 0.161253212     | 1.454867356       | 2.668039551  |
| 10.42273051    | 7.086692044     | 2.533403973     | 0.151925356       | 0.282151666  |
| 9.737648235    | 5.429770161     | 2.44622752      | 0.017471252       | 1.696223777  |
| 11.00519487    | 6.579020483     | 0.135106614     | 0.08438037        | 2.913203189  |
| 10.34728345    | 6.776114916     | 1.449133358     | 0.083663006       | 2.114995072  |
| 8.922513818    | 6.671162523     | 4.619491779     | 2.404213628       | 2.123866462  |
| 10.74360031    | 7.982416758     | 3.875163208     | 0                 | 1.972106684  |
| 10.75672365    | 7.565809592     | 3.080369083     | 0.037359001       | 0.059363912  |
| 9.793619957    | 7.333407311     | 1.904835133     | 0.050746765       | 0.082055849  |
| 10.08245824    | 7.654949405     | 2.987399651     | 0.024420669       | 2.764628215  |
| 10.93880491    | 13.0715404      | 2.717491752     | 3.33420998        | 1.786887062  |
| 12.05851655    | 8.213830386     | 3.584515917     | 0.999726201       | 5.699968962  |
| 10.69505871    | 8.125395038     | 2.809904941     | 1.039488449       | 1.001591049  |
| 10.89579093    | 7.605961192     | 2.229687964     | 1.313918549       | 2.227108805  |
| 10.87404019    | 7.805005855     | 1.944503123     | 0.057098686       | 8.227884531  |
| 10.59976794    | 7.304835348     | 4.344883993     | 0.145680353       | 5.535203884  |
| 9.698174222    | 6.447008095     | 2.492206545     | 2.997299748       | 0.122579103  |
| 9.625098915    | 6.989273718     | 2.315039369     | 2.095456218       | 0            |
| 10.2066064     | 5.794907703     | 1.264842141     | 0.049792908       | 3.174895544  |
| 11.30345213    | 7.572630444     | 1.670329001     | 0.013444858       | 2.684492154  |
| 9.971984657    | 6.565366586     | 2.733213117     | 0.059076257       | 0.096576322  |
| 8.356013002    | 6.666009198     | 2.870624405     | 0.039739417       | 2.875005059  |
| 11.3068531     | 5.976960527     | 2.045546969     | 0.073318205       | 0.122146707  |
| 11.58887898    | 10.99054445     | 0.054543965     | 0.036015572       | 2.246668107  |
| 10.51573855    | 8.001543728     | 0               | 1.925815283       | 1.505714551  |
| 8.975056767    | 7.413909694     | 1.89942682      | 0                 | 2.215951994  |
| 10.42016609    | 9.706610604     | 4.251888394     | 0.091794422       | 2.166450102  |
| 10.83310496    | 7.831236389     | 3.047611007     | 0.106288348       | 0.185164666  |
| 10.15840136    | 9.650957465     | 2.783115905     | 0.066469313       | 0.109730995  |
| 11.12366381    | 7.730092723     | 4.642216574     | 2.157167162       | 1.416605391  |
| 9.453120944    | 6.262126128     | 4.013218008     | 0.00167867        | 2.011636719  |
| 12.08992705    | 7.385369724     | 2.459157731     | 0.673640828       | 0.656997599  |
| 9.130566048    | 6.663020589     | 3.243082972     | 0.032806201       | 4.427750544  |
| 10.41879762    | 6.450485672     | 2.090449841     | 1.062826091       | 5.236113275  |
| 9.881414698    | 6.183425487     | 2.650382271     | 1.042521771       | 0.013670553  |
| 9.638091963    | 5.608565669     | 2.964921687     | 2.294627019       | 1.687123627  |

|             |             |             |             |             |
|-------------|-------------|-------------|-------------|-------------|
| 9.623984232 | 7.37242462  | 2.350310975 | 2.035294816 | 0.595067344 |
| 9.546088882 | 5.68122102  | 2.965286919 | 0.874227479 | 0           |
| 11.18432331 | 10.81713046 | 2.985742959 | 0           | 2.350305355 |
| 8.429661769 | 7.821475608 | 4.250253349 | 3.631965952 | 0           |
| 10.03985854 | 7.111684341 | 3.486289113 | 1.102800963 | 3.336172294 |
| 13.01254921 | 7.049844078 | 4.642300226 | 0           | 0.834248927 |
| 12.39720576 | 7.572113056 | 1.860467808 | 0           | 0           |
| 10.47293636 | 5.802988738 | 1.03015338  | 0.005732083 | 1.621530125 |
| 8.951854747 | 8.336913199 | 4.282459864 | 0           | 1.965599354 |
| 10.22868884 | 7.383168121 | 1.836409852 | 0.039815103 | 6.315736674 |
| 10.983327   | 6.370391668 | 2.251383322 | 0.037074905 | 0.058890811 |
| 9.926062511 | 6.385826995 | 1.980872939 | 3.441954459 | 0           |
| 10.9503624  | 6.779191733 | 2.560531087 | 0           | 0.982716999 |
| 10.87914784 | 7.312313959 | 2.622573266 | 1.084080516 | 0           |
| 10.81297847 | 7.132941725 | 3.066444106 | 2.501449109 | 1.907030717 |
| 10.06953154 | 6.452261241 | 2.832361906 | 0.034303591 | 1.802964503 |
| 10.94362863 | 8.194205469 | 2.72911422  | 1.503708136 | 0.19284231  |
| 10.3606295  | 9.016410593 | 3.710319835 | 1.006040538 | 3.469407982 |
| 8.702187057 | 7.768759898 | 4.023162555 | 0.177779762 | 0.342734967 |
| 15.70045661 | 8.729617523 | 2.851457502 | 1.028157787 | 2.364615369 |
| 11.87162586 | 8.156195177 | 0.28488378  | 0.162119751 | 2.615768651 |
| 10.68432249 | 6.947823799 | 0.013498735 | 0.009186028 | 0.014079859 |
| 10.76568726 | 6.393160587 | 2.549614071 | 0           | 0           |
| 10.96483914 | 5.79369233  | 2.699538172 | 0.054111794 | 0.087884155 |
| 11.38291787 | 7.411446953 | 4.588104412 | 0           | 3.473321331 |
| 15.54187711 | 7.04998671  | 2.374509079 | 0           | 2.116051099 |
| 8.684547584 | 7.021895399 | 3.020529758 | 2.491374398 | 5.40134606  |
| 13.20903283 | 7.17948617  | 1.97578136  | 0.983199566 | 0           |
| 15.84410063 | 9.347964715 | 3.603471671 | 0.877883975 | 3.493871846 |
| 9.90757882  | 6.698411528 | 2.613895722 | 0.04158003  | 0.066434035 |
| 8.560031249 | 6.551349185 | 2.358093552 | 0.123683144 | 1.675793725 |
| 11.17366617 | 7.339248591 | 2.119175931 | 0.085165099 | 0.144158417 |
| 9.999026303 | 6.560081762 | 2.941789693 | 0.695357417 | 0           |
| 9.131196756 | 6.781005142 | 2.416585058 | 0           | 4.815136592 |
| 9.703257321 | 7.675962494 | 2.950939537 | 0           | 0.506428876 |
| 11.06190551 | 6.310681352 | 2.13205564  | 0.019331691 | 0.030014779 |
| 10.86982026 | 7.733818141 | 1.956425326 | 1.549555766 | 0.967049599 |
| 13.12775668 | 8.192861344 | 1.004919842 | 1.004476593 | 2.591946438 |
| 10.85943678 | 8.061952601 | 3.89619979  | 0.041355762 | 1.847594612 |
| 9.208635179 | 7.594007782 | 3.407638025 | 0.892775729 | 0           |
| 9.356749941 | 8.082013214 | 3.35452014  | 0.794857439 | 0.781357475 |
| 9.423271659 | 5.699156315 | 2.949798364 | 1.548058242 | 1.542976419 |
| 11.15462942 | 6.176887823 | 1.223692892 | 1.198159849 | 1.2235317   |
| 10.91477604 | 8.272084849 | 3.191573961 | 0.182489962 | 3.223082361 |
| 9.328344119 | 7.441919411 | 3.100712193 | 0           | 2.947581858 |
| 9.729311643 | 5.991288221 | 2.876247571 | 0           | 6.620231422 |
| 11.77368981 | 8.355109188 | 2.603050773 | 0.871431958 | 0.861646226 |
| 10.49719364 | 15.99376004 | 2.855355668 | 0.432658259 | 0           |
| 11.10083376 | 9.584209002 | 3.122102893 | 1.674488051 | 6.859856242 |
| 14.37416758 | 8.292514353 | 2.829990047 | 1.014435959 | 3.608906914 |
| 13.23700147 | 7.819983891 | 3.131729735 | 0.017577332 | 2.939519942 |
| 11.19561466 | 7.429417205 | 3.263278507 | 1.754733143 | 2.02796186  |
| 10.19663967 | 5.980432283 | 1.49476102  | 0.654765918 | 2.983070899 |
| 9.940631665 | 8.4068362   | 4.068111248 | 0.065352414 | 2.444016833 |
| 11.93147827 | 7.352973667 | 1.542384177 | 2.318886948 | 0.757046733 |
| 11.25111883 | 7.858587365 | 1.321097782 | 0.801075297 | 2.017262649 |
| 11.38146264 | 6.496736251 | 2.7887132   | 0           | 2.473645871 |
| 9.141162069 | 6.119329144 | 2.867923129 | 0           | 1.475305892 |

|             |             |             |             |             |
|-------------|-------------|-------------|-------------|-------------|
| 13.10264802 | 10.70388553 | 0.057048779 | 1.177144876 | 7.790716416 |
| 9.859339135 | 6.683758245 | 2.369588533 | 2.267020471 | 4.216874164 |
| 9.227247841 | 6.432247812 | 4.679751627 | 0.068421346 | 2.464531133 |
| 8.701373604 | 7.852403616 | 2.267025339 | 0.483082859 | 3.127032169 |
| 10.02704278 | 10.23254507 | 2.319024917 | 0.047237037 | 1.250980737 |
| 11.00557576 | 7.265288266 | 2.154064491 | 0.022585571 | 6.539493275 |
| 9.558278013 | 6.98513132  | 2.919853575 | 0.015157619 | 1.681521462 |
| 8.958331009 | 8.834777208 | 4.94116136  | 0           | 1.000646141 |
| 9.534580136 | 6.720061879 | 5.052031503 | 2.599546476 | 2.21509211  |
| 9.900940076 | 5.743925137 | 2.752380616 | 1.288782738 | 0.101590048 |
| 9.877633383 | 7.336960988 | 2.704317926 | 0.016360342 | 2.439656361 |
| 10.49937238 | 7.289235522 | 2.99551631  | 0.057702812 | 0.09416034  |
| 11.36452469 | 9.613121487 | 4.018436643 | 1.068338463 | 8.301520351 |
| 10.81087395 | 7.661789222 | 0.215463846 | 0.127818756 | 0.229423391 |
| 11.49135656 | 6.647026595 | 3.543995443 | 0.010997474 | 4.336078588 |
| 9.953678529 | 8.20974119  | 5.20325223  | 0           | 4.954305394 |
| 10.10753466 | 6.358890878 | 4.073700622 | 0.049780957 | 1.264718255 |
| 10.86860251 | 6.386315644 | 3.388474713 | 0.651089286 | 2.576839184 |
| 10.61973679 | 7.502864804 | 0.982493931 | 0           | 4.294798983 |
| 9.736035386 | 7.962256872 | 1.948524524 | 0.057743161 | 1.307875397 |
| 10.26243087 | 6.984034177 | 2.568179957 | 0.085217731 | 0.144257755 |
| 9.709151927 | 8.272965859 | 3.900685323 | 0.561547813 | 0.544445178 |
| 12.50902735 | 7.571522987 | 3.303730625 | 0           | 0           |
| 9.578557646 | 5.826478839 | 2.479033421 | 1.757340167 | 2.313395984 |
| 11.51853374 | 8.768076062 | 0.15623214  | 0.096227549 | 1.520164007 |
| 9.66361589  | 6.355637057 | 2.167550738 | 0.897899698 | 1.851784097 |
| 11.6079427  | 9.555768956 | 3.958238805 | 1.315492923 | 2.460380503 |
| 9.613600909 | 7.590534352 | 3.667499535 | 0.046467267 | 2.923000282 |
| 9.420811923 | 7.073199414 | 2.087508831 | 1.060781866 | 1.067142925 |
| 10.74136074 | 7.593920992 | 3.642188916 | 0.007386992 | 8.867713964 |
| 10.52355895 | 9.935276989 | 3.527378653 | 0           | 0.710302965 |
| 10.59543006 | 4.823540781 | 2.209750791 | 0           | 2.468505879 |
| 10.08267619 | 7.541950867 | 0.964570871 | 0           | 1.541777263 |
| 10.38931139 | 6.899773459 | 2.129414171 | 0.018941756 | 3.14413739  |
| 9.422672482 | 6.340622138 | 1.559178961 | 0           | 0           |
| 10.0812208  | 8.137667812 | 2.020189974 | 1.948663687 | 0.114732633 |
| 10.71401347 | 6.029637623 | 2.396672433 | 0.058986658 | 1.314637782 |
| 10.03893288 | 6.454879748 | 4.306336538 | 1.035419625 | 2.863570233 |
| 8.98135642  | 15.08142494 | 2.969509251 | 1.443757801 | 1.034761206 |
| 10.1175896  | 6.963597667 | 3.194406101 | 0           | 1.484339369 |
| 9.940167491 | 6.534729757 | 4.25220741  | 0.021285914 | 3.867283698 |
| 11.45430705 | 12.18270039 | 3.571618978 | 1.879652247 | 5.344400787 |
| 13.71261793 | 15.8530896  | 2.337241082 | 3.097135886 | 0.080744703 |
| 10.68009607 | 6.120251992 | 1.745006783 | 1.298485971 | 1.742799774 |
| 10.0193183  | 5.566691024 | 1.289920995 | 1.254716543 | 1.930319175 |
| 9.933619888 | 6.58103538  | 3.037605049 | 1.148213663 | 1.784456177 |
| 10.61259454 | 9.162035671 | 2.022296671 | 0.003240036 | 1.016984745 |
| 10.28237049 | 5.924659148 | 3.173347703 | 0           | 1.463892444 |
| 10.90273395 | 7.086239475 | 1.84653465  | 2.156901695 | 5.13915134  |
| 9.960777896 | 6.497847908 | 2.214398451 | 1.302192163 | 0.750274345 |
| 8.291937765 | 7.187324924 | 4.707334672 | 0.46415872  | 5.710957878 |
| 9.850222638 | 7.275359502 | 2.835084462 | 0.034689285 | 1.805406519 |
| 11.82860927 | 7.010498705 | 3.504720849 | 1.527536697 | 0           |
| 13.38830862 | 7.45666448  | 2.554524252 | 0           | 0.978485395 |
| 10.61338217 | 6.868438326 | 3.298871368 | 0.902312967 | 0           |
| 10.9241308  | 10.12877152 | 3.673044131 | 0.713927446 | 6.940188337 |
| 8.343975015 | 6.548060009 | 5.95061958  | 0.025092601 | 4.368349386 |
| 9.394704495 | 5.856938056 | 1.734155474 | 0           | 0.804005681 |

| hsa-miR-6783-3p | hsa-miR-515-5p | hsa-miR-519b-3p | hsa-miR-4536-3p | hsa-miR-3677-5p |
|-----------------|----------------|-----------------|-----------------|-----------------|
| 0.060123833     | 0.106327588    | 0.101583778     | 0.053455159     | 2.426482633     |
| 0.040093114     | 0.068709561    | 0.065857306     | 1.188465035     | 0.062626428     |
| 0.01986158      | 0.032995421    | 0.031723668     | 1.692571575     | 1.111603164     |
| 0.010460701     | 1.058637186    | 0.016494783     | 0.009406999     | 3.405551576     |
| 0.064641982     | 0.115141599    | 0.109921222     | 1.920237625     | 1.369022441     |
| 0.028567302     | 0.048093593    | 0.046179424     | 0.0255811       | 3.393712779     |
| 1.407547902     | 0.15528761     | 0.147737634     | 1.388275473     | 1.485549099     |
| 0.012494549     | 2.092006666    | 0.019756534     | 1.059565813     | 2.680844244     |
| 1.507970778     | 0              | 0               | 0               | 0.927019927     |
| 2.484688239     | 0.045253071    | 0.04346265      | 0.024139172     | 4.215758931     |
| 2.032941204     | 0.584383298    | 0               | 0               | 2.338165508     |
| 0.113277145     | 0.218452648    | 0.206715232     | 0.099572232     | 3.134338705     |
| 0.059804798     | 0.105709907    | 0.100999022     | 2.323084485     | 1.340816451     |
| 0.983666052     | 0              | 0.981701544     | 0.984260884     | 1.976186997     |
| 2.108529713     | 0.184979832    | 0.175540452     | 0.086705075     | 2.68986434      |
| 1.722343383     | 0.040595904    | 0.039005482     | 0.021757229     | 1.747683405     |
| 1.077470938     | 0              | 0               | 0               | 2.861216698     |
| 0               | 2.04468187     | 0.358899987     | 2.068978863     | 1.321429775     |
| 0.044708803     | 2.327185494    | 0.073914706     | 0.039887596     | 2.651597152     |
| 0.121532178     | 0.2376479      | 0.224512896     | 0.106647587     | 3.895646647     |
| 1.441198594     | 0.170560405    | 0.162056158     | 2.807255299     | 1.528454436     |
| 0.139708042     | 0.281783474    | 2.535106802     | 0.122149185     | 0.247208929     |
| 0.016363228     | 1.091979559    | 0.026010915     | 1.077855336     | 2.117958459     |
| 0.078286071     | 2.913045755    | 2.563589677     | 0.069326101     | 1.449121555     |
| 1.375604579     | 2.566035386    | 0.134480399     | 0.068753254     | 1.445240448     |
| 0               | 0              | 0               | 0               | 3.213478018     |
| 2.560944869     | 0.97899525     | 0               | 0               | 4.216705292     |
| 0.034889234     | 0.059311339    | 0.056895425     | 1.164438387     | 2.848938538     |
| 0.047301833     | 0.081979676    | 0.07848659      | 0.042176257     | 0.074539861     |
| 1.112868329     | 0.038131164    | 0.036645133     | 0.020487547     | 1.128522191     |
| 0.519363478     | 0              | 0               | 0               | 1.280842672     |
| 0.999732228     | 0              | 0               | 0.999742102     | 0               |
| 0               | 1.350769372    | 0.540271037     | 0.576236549     | 2.262134662     |
| 0.778301989     | 1.975646283    | 0               | 0.785040591     | 2.802894656     |
| 1.259682345     | 0.093012015    | 0.0889642       | 1.24830819      | 0.08440038      |
| 0.134071348     | 0.2678132      | 0.252365281     | 0.117352933     | 0.235528597     |
| 0.068343453     | 0.122455967    | 0.116830537     | 0.060652881     | 1.390673207     |
| 0               | 0.81543887     | 0               | 0               | 1.752148941     |
| 0.046418982     | 0.08033858     | 0.07692631      | 0.04139733      | 1.895171319     |
| 0.012599608     | 0.020702184    | 0.019925512     | 2.071972356     | 3.686307701     |
| 0.055001435     | 0.096484031    | 0.092257521     | 0.048956763     | 3.746697296     |
| 1.182285429     | 0.063285036    | 0.060686407     | 0.033156389     | 3.286828251     |
| 0.068126097     | 1.393053207    | 0.116422831     | 0.060462871     | 2.039118174     |
| 1.773787079     | 2.848260896    | 1.190917934     | 0.030089288     | 0.052137483     |
| 1.516791762     | 0              | 0               | 0               | 2.494034583     |
| 1.505031487     | 0.924424069    | 0               | 0               | 1.492943701     |
| 3.294622386     | 0.156612671    | 0.148981382     | 0.075231211     | 3.441119246     |
| 2.108477876     | 0.184956857    | 0.175518993     | 0.086696001     | 0.165065549     |
| 1.923722606     | 0.109623417    | 0.104702881     | 0.054943209     | 0.099172802     |
| 2.161987732     | 0              | 0               | 0               | 1.818340809     |
| 0.001575868     | 0.002546765    | 0.002455095     | 0.001420132     | 3.012516886     |
| 1.195535813     | 0              | 0               | 0.687585409     | 2.280883047     |
| 0.030657434     | 0.051778411    | 0.049701722     | 0.027439492     | 3.043165941     |
| 0.012375098     | 0.020326403    | 0.019564467     | 1.058999941     | 2.089358298     |
| 1.041551344     | 0.013659622    | 0.013155214     | 0.007527588     | 1.046825299     |
| 0               | 7.016989613    | 7.579018145     | 0.795432591     | 1.690291053     |

|             |             |             |             |             |
|-------------|-------------|-------------|-------------|-------------|
| 0.617876711 | 0           | 0           | 0           | 1.433214769 |
| 0           | 0           | 0           | 0           | 2.133550366 |
| 0           | 0           | 0           | 0           | 2.992760834 |
| 1.597310052 | 0           | 0           | 0           | 3.461255848 |
| 1.100339414 | 1.114284062 | 0.03243216  | 1.096360012 | 2.739897036 |
| 0           | 0           | 0           | 0.853329849 | 1.380919193 |
| 0           | 0.683529497 | 0           | 1.240959138 | 3.193280367 |
| 0.005377819 | 0.008740696 | 0.008421532 | 1.025730957 | 1.030066876 |
| 0           | 0           | 0           | 0.977634845 | 3.76911971  |
| 0.037169912 | 0.063411779 | 0.060807279 | 0.033218644 | 4.201488338 |
| 0.034625328 | 0.058838708 | 0.056444354 | 0.030962609 | 2.57852879  |
| 1.569857748 | 0.985494813 | 0           | 0           | 0           |
| 2.787461654 | 1.977058153 | 0.982661727 | 0.985089121 | 3.974430009 |
| 0           | 0           | 0           | 0.609473308 | 1.934963062 |
| 0           | 0           | 0           | 1.925956395 | 3.219558406 |
| 1.765108089 | 0.054246266 | 0.052059476 | 0.028676547 | 4.162009572 |
| 0.101808428 | 0.192623097 | 0.182674616 | 0.089705027 | 0.171672005 |
| 1.005906831 | 2.331090085 | 3.009608707 | 0.001069143 | 3.179427491 |
| 0.162958427 | 0.342248548 | 0.320490045 | 0.141831331 | 0.297116684 |
| 2.842401162 | 0.009000186 | 0.008671351 | 1.026486428 | 2.363616718 |
| 1.70223653  | 0.305110194 | 0.286606966 | 0.129942898 | 1.87707288  |
| 0.00861391  | 0.014068589 | 0.013548597 | 1.63218375  | 1.642859987 |
| 1.397088796 | 0           | 0           | 0           | 2.079101805 |
| 0.05041451  | 1.288187699 | 0.084018263 | 3.453868949 | 0.079748355 |
| 2.914565361 | 0           | 0           | 0           | 2.703550914 |
| 0           | 0           | 0           | 1.435027437 | 2.377154311 |
| 1.133761385 | 0.045558717 | 1.153485177 | 0.02429472  | 0.041702898 |
| 0           | 0           | 0           | 1.980781992 | 2.781369212 |
| 0           | 0           | 0           | 0           | 0.868081745 |
| 1.190555151 | 0.066374316 | 0.06363184  | 0.034669447 | 0.060523925 |
| 0.114150198 | 0.220458466 | 1.672467346 | 2.583977593 | 1.663592882 |
| 0.079005678 | 0.144007752 | 0.137138557 | 0.069952441 | 1.453368449 |
| 0.700286414 | 0           | 0           | 0           | 2.50299941  |
| 0           | 0           | 0           | 0           | 3.591633456 |
| 2.118601654 | 0.50634827  | 0.503747207 | 0           | 1.8124443   |
| 1.089572271 | 0.029989855 | 0.028841468 | 1.086046081 | 2.130390346 |
| 0           | 0           | 0           | 0.971495162 | 0.967010281 |
| 1.590046144 | 0.001419191 | 0.001368242 | 2.005098105 | 3.006986359 |
| 1.80068133  | 0.065997123 | 0.063272295 | 0.034485194 | 1.218321985 |
| 1.46129754  | 0           | 0           | 1.874904049 | 1.846444887 |
| 1.344891043 | 0           | 0           | 1.755090697 | 3.246323981 |
| 1.549025781 | 0           | 0           | 0           | 0.965625267 |
| 1.193070507 | 0.067317995 | 0.064531265 | 0.035129831 | 2.612687404 |
| 0.16717977  | 0.353738832 | 2.012090257 | 0.145387825 | 2.695081951 |
| 0.867883757 | 0           | 0           | 0           | 2.1199655   |
| 1.496232276 | 0           | 0           | 0.926951363 | 3.198261406 |
| 0.873947399 | 0           | 0           | 0.878137308 | 1.81567156  |
| 0.439091204 | 0.417026307 | 0           | 0.450443104 | 2.174305628 |
| 0.015246765 | 0.025152169 | 0.024199192 | 0.013695487 | 2.109961221 |
| 1.014114132 | 0.00459232  | 0.004426231 | 1.600606769 | 3.607981798 |
| 1.081513912 | 1.696898099 | 0.02617199  | 0.014783145 | 2.445117283 |
| 0           | 2.281442912 | 1.330177854 | 1.771481247 | 2.503961765 |
| 0.660084688 | 5.320873747 | 5.735263635 | 0.66920413  | 3.215944616 |
| 0.060791435 | 0.107622122 | 0.102809108 | 0.054040705 | 0.097397785 |
| 0           | 0           | 0           | 0.3972041   | 2.201512487 |
| 0.804697806 | 0           | 0           | 0           | 2.276302274 |
| 1.596538745 | 0           | 0           | 0.69815446  | 2.484286575 |
| 2.218957605 | 0.910759435 | 0           | 0           | 3.189919423 |

|             |             |             |             |             |
|-------------|-------------|-------------|-------------|-------------|
| 0.035114774 | 0.059715562 | 0.057281181 | 1.165482367 | 2.251267849 |
| 0           | 0           | 0           | 0           | 1.741337749 |
| 1.309456837 | 1.366174301 | 2.01550663  | 1.295526525 | 1.363049502 |
| 0.489403687 | 0           | 0           | 1.620823476 | 2.417730596 |
| 2.255743747 | 6.126802179 | 5.609470825 | 0.039307672 | 3.14325559  |
| 0.021137446 | 0.035183255 | 0.033820754 | 0.018960622 | 1.118825111 |
| 0.014201127 | 0.023390162 | 0.022507389 | 0.012759378 | 0.021498776 |
| 1.965321822 | 0           | 0           | 1.739992998 | 3.463538966 |
| 0.194846748 | 0.433237685 | 2.197540344 | 0.168574748 | 0.370302449 |
| 0.057617707 | 0.101492007 | 0.09700429  | 0.051255567 | 3.015346214 |
| 1.075915622 | 0.025284663 | 0.024326385 | 1.668385224 | 2.436681674 |
| 0.053733061 | 0.094070786 | 0.089968687 | 1.250843588 | 2.381956283 |
| 1.66192352  | 0.022152839 | 0.021319056 | 1.064159962 | 4.502005464 |
| 0.117903554 | 0.229146797 | 0.216637895 | 0.103540246 | 1.686378324 |
| 0.010309789 | 3.084121744 | 3.253630673 | 1.049205063 | 4.476566847 |
| 0.973965219 | 1.54948031  | 0           | 0.974906128 | 1.962036536 |
| 1.842577114 | 0.080318042 | 0.076906781 | 0.041387566 | 2.663845437 |
| 1.167041913 | 1.488706149 | 2.860726501 | 1.181218697 | 0           |
| 0           | 0           | 0           | 0.984944549 | 2.29821152  |
| 1.262530285 | 0.094141558 | 0.090035825 | 0.047874142 | 1.943975618 |
| 0.079053937 | 0.144106959 | 0.137231866 | 1.36443741  | 0.12955641  |
| 1.051495718 | 0           | 0           | 0           | 3.225771978 |
| 1.237609419 | 0           | 0           | 0           | 3.58819229  |
| 0.600183861 | 0           | 0           | 0.61018657  | 1.406130737 |
| 0.089134489 | 0.165166229 | 0.157003281 | 0.078748863 | 2.966696742 |
| 0           | 0           | 0           | 0.903351118 | 2.169314011 |
| 0.063046924 | 0.112015723 | 0.106965803 | 0.056017728 | 4.188621466 |
| 1.826176041 | 0.074648384 | 0.071512909 | 0.038677595 | 1.87470426  |
| 1.653479765 | 0.019650883 | 0.01891538  | 1.65035609  | 2.086456109 |
| 0.006928757 | 0.011287706 | 0.010873129 | 1.62301371  | 3.054793976 |
| 1.260770914 | 0           | 0           | 0           | 4.919892675 |
| 0           | 0           | 0           | 1.913926238 | 1.48681258  |
| 0.968300692 | 0           | 0           | 0           | 2.273771229 |
| 2.430288684 | 1.099764991 | 0.028247218 | 1.084330933 | 2.454559026 |
| 0           | 0           | 0           | 0           | 0.978824555 |
| 0.064375903 | 0.114619073 | 0.109427299 | 1.298929407 | 1.367468336 |
| 0.054918705 | 5.042120382 | 4.692133613 | 0.048884029 | 2.995780095 |
| 0.006966582 | 0.011349971 | 0.010933048 | 1.033305713 | 1.038970873 |
| 1.755965396 | 0           | 0           | 0.600672788 | 3.271333002 |
| 0           | 4.062949412 | 5.147055953 | 0           | 3.203675896 |
| 2.118763086 | 4.629066177 | 4.973855466 | 1.094629253 | 4.248214395 |
| 0.992722265 | 4.089451995 | 3.288161227 | 0           | 2.485113577 |
| 1.228129573 | 0.080669945 | 0.077241393 | 1.218317779 | 2.332047282 |
| 0.494703862 | 0.47188293  | 0           | 0.971899104 | 0.903867338 |
| 0.050718839 | 0.088373841 | 0.084561667 | 0.045188193 | 2.360899441 |
| 1.144541079 | 1.784453062 | 1.166150575 | 0.026260964 | 0.045221869 |
| 1.015131452 | 8.353011307 | 7.059345912 | 0.002739431 | 2.608449135 |
| 0           | 0           | 0           | 0           | 2.665401315 |
| 1.217336171 | 2.090814185 | 1.548811733 | 1.230280573 | 0.672732184 |
| 0           | 0           | 0           | 0           | 2.218399654 |
| 1.562900566 | 0           | 0.870564741 | 1.835577486 | 2.379623057 |
| 0.032408409 | 3.261244214 | 3.582696416 | 0.028994973 | 1.801955768 |
| 0.952128455 | 0           | 0           | 1.943676116 | 1.930159325 |
| 0.980724405 | 0           | 0           | 0.981424748 | 1.558929566 |
| 0.904282156 | 6.133152861 | 5.78750403  | 1.477118592 | 3.165107865 |
| 1.245867321 | 0           | 0           | 1.651412032 | 3.600272302 |
| 1.115935464 | 6.108301487 | 6.054233208 | 0.021046139 | 3.995291866 |
| 0           | 3.770489943 | 3.391850425 | 0           | 1.736217547 |

| hsa-miR-525-5p | hsa-miR-512-5p | hsa-miR-520d-3p | hsa-miR-760 | hsa-miR-518f-3p |
|----------------|----------------|-----------------|-------------|-----------------|
| 0.111651886    | 0.105945265    | 0.107128075     | 2.40368185  | 0.103837553     |
| 0.071887743    | 0.068480405    | 0.069188946     | 3.095470787 | 0.067214829     |
| 0.034402968    | 0.032893546    | 0.033208372     | 0.026993828 | 0.032329967     |
| 0.017836046    | 0.017081401    | 0.017239008     | 3.400630331 | 1.058757039     |
| 0.121010834    | 0.114720556    | 0.116023334     | 1.99571984  | 1.372439454     |
| 0.050218169    | 0.047940066    | 0.048414618     | 0.03910502  | 0.04709135      |
| 0.1638432      | 0.154676607    | 0.156568337     | 0.121048571 | 0.151316163     |
| 1.069166547    | 0.020464705    | 1.070028997     | 1.068435399 | 0.02012373      |
| 0              | 0              | 0               | 1.907530855 | 0               |
| 0.047239231    | 0.045109503    | 0.045553253     | 2.778715066 | 0.044315734     |
| 0              | 0              | 0               | 1.065277993 | 0               |
| 0.231922685    | 0.217497623    | 0.220457455     | 1.627993204 | 0.212261365     |
| 0.110996618    | 0.105330257    | 0.106504786     | 0.084001102 | 0.10323722      |
| 0              | 0              | 0               | 2.560758292 | 0               |
| 0.195739886    | 0.18421399     | 0.186586234     | 0.142576798 | 0.180008055     |
| 0.042358655    | 0.040468422    | 0.040862425     | 1.74156977  | 0.039763437     |
| 0              | 0              | 0               | 1.399318938 | 0               |
| 2.526898069    | 0.361901035    | 1.72629363      | 1.338539318 | 2.53109261      |
| 2.663156406    | 0.076910394    | 1.254613117     | 2.302913903 | 1.255118409     |
| 0.252780679    | 0.236577391    | 0.239896162     | 2.790374712 | 0.230713536     |
| 1.530021734    | 0.16987128     | 0.172005397     | 0.132181999 | 0.166084        |
| 0.301043874    | 0.280428077    | 0.284633076     | 0.209585931 | 0.273020069     |
| 1.09075457     | 0.026957301    | 1.696209253     | 0.02217531  | 0.026501502     |
| 3.19452264     | 2.570367973    | 3.421620338     | 1.432337314 | 2.90867323      |
| 1.445067374    | 0.140640549    | 0.142317398     | 0.110651169 | 1.45016961      |
| 0              | 0              | 0               | 2.361860801 | 0               |
| 1.972221558    | 0              | 1.559317208     | 3.778231507 | 0               |
| 1.195332237    | 0.05911739     | 0.059716986     | 0.048008332 | 0.058045782     |
| 0.085881815    | 0.081698726    | 0.082567589     | 1.260267631 | 0.080148073     |
| 0.039777451    | 1.128886492    | 1.128703918     | 1.125325126 | 0.037353419     |
| 0              | 0.938736587    | 0               | 1.294080705 | 0               |
| 0              | 0              | 0               | 1.584612205 | 0               |
| 1.355938217    | 1.350641275    | 0.543265986     | 1.654993474 | 0.541170798     |
| 0.763279343    | 0.759880206    | 0               | 2.246979405 | 0.759301443     |
| 0.097543457    | 0.092686148    | 1.304161502     | 0.074281531 | 0.09088853      |
| 0.285720858    | 1.803115075    | 1.803459727     | 0.200201564 | 0.259646873     |
| 0.128789633    | 0.122001976    | 0.12340686      | 1.376996206 | 0.119501102     |
| 1.35828089     | 0              | 0               | 1.362875822 | 0               |
| 0.084149239    | 0.080064167    | 0.080912792     | 0.064483527 | 0.078549479     |
| 0.02155982     | 0.02064003     | 0.02083207      | 2.087120073 | 0.020295995     |
| 0.101218691    | 0.096143679    | 0.09719648      | 2.370384116 | 0.094266471     |
| 0.066177621    | 0.063076351    | 0.063721545     | 1.823127691 | 0.061923533     |
| 0.12833004     | 0.121572079    | 0.12297087      | 1.375787686 | 0.119081983     |
| 2.579264685    | 1.813770946    | 1.19051009      | 0.046243277 | 1.813425236     |
| 0              | 0              | 0               | 1.91809521  | 0               |
| 0.925456327    | 1.898918675    | 1.492248005     | 0.925621946 | 0.924232629     |
| 0.165262673    | 0.155995018    | 0.157907376     | 0.122019596 | 1.495251971     |
| 2.257350956    | 0.184191139    | 0.186562996     | 1.544198233 | 0.179985883     |
| 0.115149603    | 0.109226741    | 0.110454017     | 0.086977309 | 0.107040249     |
| 0              | 0              | 0               | 2.398277367 | 0               |
| 0.002647654    | 1.008801225    | 0.002562067     | 2.333289561 | 0.002498859     |
| 0              | 0              | 0               | 0.658208625 | 0               |
| 0.054084976    | 0.051611799    | 0.052126826     | 1.782264365 | 0.050690903     |
| 0.021167707    | 0.02026543     | 0.02045382      | 2.085580495 | 0.019927928     |
| 0.014215886    | 0.013619279    | 0.013743916     | 1.045799264 | 0.013395902     |
| 10.59996743    | 8.072256272    | 9.013721722     | 1.307637364 | 7.708148687     |

|             |             |             |             |             |
|-------------|-------------|-------------|-------------|-------------|
| 0           | 0           | 0           | 0.595580282 | 0           |
| 0           | 0           | 0.864754932 | 0.866322347 | 0           |
| 0           | 0           | 0           | 2.729851543 | 0           |
| 0           | 0           | 0           | 4.483169443 | 0.667504455 |
| 1.112770495 | 1.722945588 | 1.114165949 | 1.111268999 | 0.03305301  |
| 0           | 0           | 0           | 2.356282332 | 0           |
| 0           | 0           | 0           | 0.685027788 | 0           |
| 0.009092352 | 0.008715179 | 0.008794005 | 1.619928569 | 0.008573861 |
| 0           | 0           | 0           | 3.134503328 | 0           |
| 0.066310969 | 0.063202621 | 0.06384928  | 2.252995419 | 0.062047194 |
| 1.193828041 | 0.058646498 | 0.059240716 | 2.236047363 | 0.05758447  |
| 1.980832146 | 0.985487876 | 0.985511694 | 0           | 0           |
| 4.432077845 | 2.297929113 | 3.433205697 | 1.978312775 | 2.298001611 |
| 0           | 0           | 0           | 2.511010004 | 0           |
| 0           | 0           | 0           | 2.230411985 | 0           |
| 0.056676252 | 0.054070784 | 0.054613247 | 2.814405475 | 0.05310098  |
| 0.203980859 | 0.191815422 | 0.194317549 | 2.223815777 | 0.187381413 |
| 4.180271518 | 3.179749141 | 3.7105298   | 2.816198209 | 3.469329225 |
| 0.367864965 | 0.340459012 | 0.346016449 | 0.249161182 | 0.330708035 |
| 0.009362515 | 0.008973896 | 0.009055113 | 2.361709752 | 0.008828295 |
| 0.326725677 | 0.303593322 | 0.308301092 | 0.225050976 | 0.295312491 |
| 1.643086404 | 0.014026999 | 0.014155491 | 0.011599358 | 0.013796717 |
| 0.82917178  | 0           | 0           | 0           | 0           |
| 2.36860915  | 1.288271601 | 1.928316332 | 0.070265141 | 0.08581731  |
| 0           | 0           | 0           | 4.067464739 | 0           |
| 0           | 0           | 0           | 0.856682981 | 0           |
| 1.151237412 | 0.045414082 | 0.04586113  | 1.759752427 | 0.04461443  |
| 0           | 0           | 0           | 3.144863066 | 0           |
| 0           | 0           | 0           | 1.830920321 | 0           |
| 0.069428815 | 0.066154023 | 0.066835137 | 0.053573118 | 0.064937258 |
| 2.369017108 | 0.219491613 | 0.222488202 | 1.632892402 | 0.214191024 |
| 1.453335564 | 0.143452374 | 0.145171577 | 0.112742855 | 0.14039619  |
| 0.683313734 | 0           | 0           | 2.122074962 | 0           |
| 0           | 0           | 0           | 2.436840592 | 0           |
| 1.300399455 | 0.506061237 | 1.295047993 | 0           | 0           |
| 1.100477705 | 0.029897885 | 0.030182089 | 2.450672535 | 0.02938903  |
| 0           | 0           | 0           | 0           | 0           |
| 2.328714361 | 0.00141512  | 0.001427695 | 1.590688947 | 1.004916802 |
| 0.069031749 | 0.065778255 | 0.066454961 | 1.832614725 | 0.064569336 |
| 0.885858873 | 0           | 0           | 1.44725343  | 0           |
| 0           | 0           | 0           | 2.023295432 | 0           |
| 0           | 0           | 0           | 0.966281124 | 0           |
| 0.070422341 | 1.223630013 | 0.067786298 | 0.054314249 | 0.065857689 |
| 2.018186895 | 0.351861057 | 0.357693646 | 1.932074006 | 0.341635254 |
| 0           | 0           | 0           | 1.411723071 | 0           |
| 0           | 0           | 0           | 1.89348398  | 0           |
| 0           | 0           | 0           | 0           | 0           |
| 0.424076528 | 0.416694015 | 0           | 1.66960719  | 0           |
| 1.084515901 | 0.025075878 | 0.025311612 | 1.083541753 | 0.024653682 |
| 0.004775179 | 0.004579046 | 0.00462005  | 2.019741199 | 0.004505517 |
| 0.028352367 | 1.092580006 | 0.027380804 | 2.439172284 | 0.0266658   |
| 1.722309909 | 1.720641987 | 1.720668045 | 1.337427886 | 1.720861208 |
| 8.615030709 | 6.343062933 | 6.830093652 | 1.136176169 | 6.531156785 |
| 0.11302545  | 0.107234179 | 0.108434399 | 0.085456466 | 1.349591932 |
| 0           | 0           | 0           | 2.481443671 | 0           |
| 0           | 0           | 0           | 0           | 0           |
| 0           | 0           | 0           | 0           | 0           |
| 3.32105157  | 0.910713855 | 0.910868624 | 1.479219795 | 0           |



|             |             |             |             |             |
|-------------|-------------|-------------|-------------|-------------|
| 0.062423481 | 0.059520124 | 0.060124328 | 1.810558402 | 0.058440309 |
| 0           | 0           | 0           | 2.003663249 | 0           |
| 2.464952719 | 0.112723047 | 1.365924102 | 0.089640288 | 0.11045173  |
| 0           | 0           | 0           | 2.304336563 | 0           |
| 7.758738926 | 6.126014019 | 6.523602792 | 1.242289438 | 5.758726643 |
| 0.036691855 | 0.03507409  | 0.035411452 | 2.145337256 | 0.034470251 |
| 1.078679324 | 0.023319502 | 1.681506883 | 0.019211056 | 0.022928432 |
| 1.006720571 | 0           | 1.001124561 | 3.891883555 | 0           |
| 0.469992278 | 0.430699064 | 0.43859495  | 0.30573273  | 0.416930833 |
| 0.106524155 | 0.10113047  | 0.10224889  | 0.080783223 | 0.099136888 |
| 2.112462052 | 0.025207947 | 0.025444995 | 0.020750938 | 0.024783401 |
| 0.098663935 | 0.09374052  | 0.094762086 | 0.075095664 | 0.091918726 |
| 0.023073787 | 0.022086107 | 0.022292297 | 2.682934203 | 0.021716756 |
| 0.243533357 | 0.228128062 | 0.231285889 | 0.173734184 | 0.222545452 |
| 5.339026979 | 2.666422711 | 4.480939092 | 2.660192652 | 4.409264048 |
| 1.549774438 | 0           | 0.971002998 | 2.960498353 | 2.281664209 |
| 0.08412756  | 0.080043711 | 0.080892083 | 1.88183009  | 0.078529471 |
| 3.285331983 | 1.780986738 | 2.232422588 | 1.802146353 | 2.23414353  |
| 0           | 0           | 0           | 0.98287787  | 0           |
| 0.098738841 | 0.093810998 | 1.307662867 | 1.296093801 | 0.091987585 |
| 0.151880586 | 0.1435511   | 0.145271795 | 0.112816215 | 0.14049228  |
| 0           | 0           | 0           | 2.598826382 | 0           |
| 0           | 0           | 0           | 1.586966495 | 0           |
| 0           | 0           | 0           | 1.419042879 | 0           |
| 0.174434574 | 0.164505065 | 0.166552418 | 0.128264433 | 0.16087049  |
| 0           | 0           | 0           | 0.891283896 | 0           |
| 0.117689858 | 0.111608535 | 0.112868382 | 3.025254615 | 0.109364357 |
| 0.078146116 | 0.07439635  | 0.0751757   | 0.060052334 | 0.073004812 |
| 0.020462899 | 0.019592028 | 0.019773871 | 0.01616468  | 0.019266242 |
| 0.011744704 | 0.011254554 | 0.011356971 | 2.371659155 | 0.011070974 |
| 0.714170373 | 0.71009136  | 0           | 2.386145036 | 0           |
| 0.920536945 | 0           | 0           | 0           | 0           |
| 0           | 0           | 0           | 2.275842262 | 0           |
| 0.030612595 | 0.02928042  | 1.705549786 | 1.097217914 | 0.028782761 |
| 0           | 0           | 0           | 0           | 0           |
| 0.120455553 | 0.114200355 | 0.115495926 | 1.354945085 | 0.111892921 |
| 8.295492156 | 5.780526324 | 5.414751634 | 0.076827797 | 5.945166067 |
| 0.011809561 | 0.011316632 | 0.011419628 | 1.038127821 | 0.011132012 |
| 0           | 0           | 0           | 1.695695991 | 0           |
| 7.784335698 | 5.523684289 | 6.207594863 | 1.49977004  | 5.528939687 |
| 7.723418303 | 4.924875939 | 6.321998887 | 3.317728112 | 6.298539257 |
| 6.344365036 | 4.407960918 | 4.540901016 | 2.369807314 | 3.4309923   |
| 1.262509247 | 0.080394216 | 0.081246917 | 0.064740961 | 0.078872281 |
| 0           | 0           | 0           | 0           | 0           |
| 0.092637672 | 0.088067063 | 0.089015893 | 2.673906277 | 0.086374373 |
| 3.042827852 | 3.041070513 | 2.815285297 | 0.040176692 | 2.545038605 |
| 9.400191173 | 7.573434021 | 7.565865161 | 1.016633418 | 6.596105055 |
| 0           | 0           | 0           | 0.902998606 | 0           |
| 2.793228307 | 1.548213721 | 1.54840252  | 0.676014658 | 2.486824126 |
| 0           | 0           | 0           | 1.281185482 | 0           |
| 0.45479207  | 0           | 1.203145034 | 2.541944815 | 0           |
| 5.235199078 | 3.065209682 | 4.360005104 | 0.044503601 | 2.837180245 |
| 0           | 0           | 0           | 0.947711085 | 0           |
| 0           | 0           | 0           | 2.293939689 | 0           |
| 8.549371465 | 6.806841299 | 7.296176552 | 0.895947504 | 6.33913763  |
| 1.585095579 | 0           | 0.698341827 | 2.553791919 | 0           |
| 8.818520213 | 6.17831839  | 6.487802286 | 1.128771701 | 7.221143935 |
| 5.69097406  | 3.592015241 | 5.134450801 | 2.312288899 | 5.138713866 |

| hsa-miR-498-5p | hsa-miR-431-3p | hsa-miR-137-3p | hsa-miR-2114-3p | hsa-miR-1292-5p |
|----------------|----------------|----------------|-----------------|-----------------|
| 0.105551769    | 6.162791436    | 2.425848972    | 0.094570921     | 2.393473881     |
| 0.068244421    | 0.072717224    | 5.903914384    | 0.06160509      | 1.836717516     |
| 0.03278858     | 3.976507437    | 3.47916804     | 6.667478526     | 2.13372237      |
| 0.017028829    | 3.409463846    | 0.015712873    | 1.058467917     | 2.070931003     |
| 0.114287266    | 7.018629493    | 1.368733096    | 2.790613618     | 0.086173493     |
| 0.047781917    | 3.036187799    | 0.043846374    | 4.982551074     | 0.037173093     |
| 0.154048214    | 3.85162449     | 0.138730293    | 1.483453697     | 0.114070711     |
| 0.020401224    | 4.632762079    | 0.018813208    | 0.01859659      | 1.067514599     |
| 0              | 4.526471798    | 0              | 0.927126331     | 1.500223071     |
| 0.044961606    | 3.391571134    | 4.538046787    | 0.040779457     | 1.145702141     |
| 0              | 1.945539416    | 6.773506428    | 0               | 1.0703754       |
| 0.216516369    | 5.809509605    | 0.192889094    | 0.189796506     | 0.155968855     |
| 0.104939509    | 4.307021473    | 0.095322661    | 3.027576611     | 1.957046005     |
| 0              | 6.099692418    | 3.295466688    | 0               | 3.297551435     |
| 0.183426707    | 4.261495864    | 0.164346056    | 0.161831042     | 2.963285557     |
| 0.040337087    | 4.457056025    | 0.037064155    | 1.746986922     | 1.13122909      |
| 0              | 8.179501584    | 0              | 0               | 1.699134466     |
| 1.318400934    | 5.452433285    | 0              | 2.443714216     | 0               |
| 1.889124782    | 4.628846032    | 0.069967079    | 1.252657326     | 0.058810822     |
| 0.235477809    | 3.763997962    | 0.209100231    | 0.205661463     | 0.168248194     |
| 0.169162707    | 5.229346362    | 0.151941451    | 4.939950845     | 0.124418395     |
| 0.279036834    | 3.668686501    | 0.245948745    | 0.241674631     | 0.195731287     |
| 0.026872425    | 1.090038487    | 0.024751823    | 6.341565635     | 2.700805009     |
| 3.418308194    | 3.959600264    | 1.448723107    | 0.125804754     | 2.068019341     |
| 0.140083291    | 3.621571537    | 2.54679818     | 0.124650271     | 1.420311674     |
| 0              | 4.792454896    | 0              | 0.693522626     | 1.902789552     |
| 0              | 3.427355571    | 5.326170211    | 0               | 2.557706709     |
| 1.198018263    | 4.824264917    | 0.053957364    | 0.053286158     | 1.80458993      |
| 1.270116469    | 4.571619115    | 0.074257636    | 0.073294434     | 0.062329987     |
| 0.03788938     | 3.186165193    | 0.034830348    | 0.034414587     | 0.029617879     |
| 0              | 5.906714532    | 1.795002198    | 1.282114005     | 0.498185771     |
| 0              | 3.584503545    | 0              | 0.999700567     | 0               |
| 0.542130651    | 4.125771673    | 0              | 0.539510793     | 0               |
| 0              | 3.604986871    | 0.758950154    | 0               | 1.297289205     |
| 0.092350692    | 5.88599006     | 0.084074419    | 0.082962339     | 1.287763906     |
| 1.802876502    | 3.338972277    | 0.234348582    | 1.780434589     | 0.187142436     |
| 0.12153483     | 8.882005685    | 0.110074876    | 3.97911057      | 1.369978266     |
| 0              | 9.813099398    | 0              | 0.81493393      | 2.076708173     |
| 0.079781626    | 3.177016164    | 0.072793847    | 6.887088148     | 1.875565125     |
| 0.020575979    | 3.807738389    | 0.018973762    | 3.098475657     | 2.085294936     |
| 0.095793331    | 3.773116094    | 0.087155413    | 3.881717496     | 2.692358376     |
| 0.06286143     | 4.639846124    | 0.057528628    | 0.056807608     | 1.200673216     |
| 0.121106953    | 4.147869195    | 0.109695597    | 3.511561239     | 0.091029752     |
| 1.813731052    | 7.426121384    | 3.585323294    | 1.189433772     | 1.796860923     |
| 0              | 11.45401486    | 1.506417586    | 0               | 1.509883347     |
| 0              | 4.338115129    | 4.207969449    | 1.900816508     | 1.497006884     |
| 0.155359798    | 4.155449146    | 1.488841519    | 0.137826851     | 1.460706666     |
| 0.183403983    | 2.253288909    | 0.164326344    | 1.565484031     | 1.532502035     |
| 0.108818493    | 3.968654236    | 0.098778539    | 0.097434148     | 1.9692352       |
| 0              | 10.12787712    | 4.433705371    | 0               | 1.827526383     |
| 0.002531889    | 5.058414115    | 0.002342361    | 1.008783011     | 1.008510291     |
| 0              | 4.049916608    | 2.91102375     | 1.153978447     | 2.496125804     |
| 0.05144018     | 5.221127032    | 0.047172431    | 3.560961729     | 1.165788688     |
| 0.020202596    | 5.968179935    | 0.018630708    | 1.667762117     | 1.066868747     |
| 0.013577701    | 3.77187325     | 0.01253625     | 4.31572169      | 0.010740154     |
| 7.506267817    | 9.185815913    | 1.301289705    | 2.65654277      | 1.704283204     |

|             |             |             |             |             |
|-------------|-------------|-------------|-------------|-------------|
| 0           | 5.175055504 | 0           | 0           | 1.084511703 |
| 0           | 2.794876245 | 0           | 2.392463654 | 0           |
| 0           | 2.141246135 | 0.702546421 | 0           | 1.226615851 |
| 0           | 8.843223851 | 6.309590654 | 0           | 2.113797661 |
| 0.033522655 | 3.165526323 | 0.030840351 | 0.03047546  | 0.026259922 |
| 0           | 4.679149371 | 1.778287904 | 0.833832012 | 0.837719666 |
| 0           | 4.209771699 | 0           | 0           | 2.137239729 |
| 1.030100185 | 4.368927353 | 0.008029507 | 4.043566657 | 0.006889587 |
| 0           | 4.81653243  | 0.974096852 | 0.974131073 | 1.968090038 |
| 0.062987213 | 3.895878788 | 3.750787719 | 0.056919828 | 1.818689483 |
| 0.058448532 | 3.991810043 | 0.053532239 | 0.052866918 | 2.230622395 |
| 0           | 4.976778741 | 0.985489954 | 2.786968656 | 0.985944344 |
| 2.974512342 | 3.558415231 | 2.298466844 | 0.98273116  | 0           |
| 0           | 4.931998689 | 0           | 0           | 2.359308128 |
| 0           | 5.134715211 | 0           | 0           | 1.913411043 |
| 0.053890036 | 3.726627557 | 0.049397389 | 5.208908808 | 1.173327577 |
| 0.190985233 | 5.611477608 | 1.588496554 | 5.085506787 | 1.551408506 |
| 3.817430574 | 3.710614404 | 1.592940676 | 0.001742969 | 0.001515473 |
| 0.338623914 | 4.638118742 | 0.295491472 | 0.28998933  | 0.231785158 |
| 0.008946798 | 6.476005109 | 0.008267468 | 2.363383503 | 2.624582846 |
| 0.302036908 | 3.740929145 | 0.265188637 | 3.643164801 | 0.209852049 |
| 0.013984135 | 2.653065903 | 0.012910561 | 0.012763922 | 2.05849131  |
| 0           | 2.331300293 | 0           | 0           | 2.350382735 |
| 0.087183738 | 4.230192853 | 0.079443212 | 1.285428313 | 2.332099173 |
| 0           | 3.3476751   | 6.060037166 | 0           | 3.223512071 |
| 0           | 4.804518733 | 0           | 2.786983249 | 1.413974685 |
| 1.769370783 | 5.190861931 | 1.15270409  | 1.152402802 | 1.146647977 |
| 0           | 5.362741878 | 0           | 0           | 1.563814536 |
| 0           | 5.758098247 | 0           | 0           | 1.430340343 |
| 0.065927158 | 3.487546564 | 0.060301306 | 0.059541153 | 1.209924746 |
| 2.367682706 | 3.706121775 | 1.662808768 | 0.191460142 | 2.722642893 |
| 0.142881092 | 4.353785464 | 1.452963707 | 3.392339972 | 1.427780031 |
| 0.678641606 | 3.168257232 | 0           | 1.858765712 | 0.682905672 |
| 0           | 2.414584654 | 1.264658159 | 5.565254826 | 1.275405627 |
| 0           | 0.962821948 | 0           | 5.281956557 | 2.05108818  |
| 0.02980312  | 3.472784757 | 0.027436775 | 6.637655834 | 2.712887616 |
| 0           | 4.591236399 | 0           | 1.957068383 | 1.546897277 |
| 0.001410924 | 5.007819533 | 0.001305572 | 1.004898359 | 1.590591394 |
| 0.065552856 | 4.415925518 | 0.059962945 | 0.059207588 | 1.827513585 |
| 0           | 2.159647592 | 1.846577078 | 0           | 2.430798898 |
| 0           | 5.604191278 | 4.461140798 | 0           | 2.028646656 |
| 0           | 3.946146094 | 0.965636666 | 1.955256587 | 1.545290587 |
| 0.066863589 | 4.505231412 | 0.061147622 | 2.279301115 | 0.051546207 |
| 2.021854801 | 6.147581856 | 0.304786244 | 0.299040451 | 0.238439283 |
| 0           | 3.096774983 | 0           | 0           | 0.858346458 |
| 0           | 4.114085494 | 0.91613417  | 2.207237496 | 1.487386999 |
| 0           | 5.384534183 | 0           | 0.861376733 | 1.824971179 |
| 0.416369319 | 5.388171588 | 2.773567322 | 0           | 1.681028226 |
| 0.024997264 | 3.124648145 | 0.023032413 | 0.022764647 | 2.428114912 |
| 0.004565364 | 4.417195828 | 0.004222061 | 0.004175078 | 1.015317955 |
| 0.027039165 | 6.316387564 | 0.024904657 | 2.118053873 | 1.689538878 |
| 1.330148238 | 4.700112361 | 0           | 0.794334849 | 0.798811285 |
| 5.201775031 | 4.942391223 | 1.497669994 | 0.635765707 | 0           |
| 0.106834907 | 5.327031233 | 0.097011905 | 0.095696014 | 2.998201797 |
| 0           | 6.654200364 | 0           | 2.332303448 | 1.777525948 |
| 0           | 4.998692273 | 0           | 0           | 2.03782801  |
| 0           | 4.422209574 | 0.666078262 | 1.16844811  | 1.180189133 |
| 1.475273801 | 4.761754023 | 2.458900056 | 1.476456477 | 0.9130769   |

|             |             |             |             |             |
|-------------|-------------|-------------|-------------|-------------|
| 0.059318837 | 4.386813437 | 1.819746205 | 2.249806817 | 2.233800561 |
| 0           | 6.934043923 | 0           | 0.603376079 | 1.469008288 |
| 2.802824722 | 2.46276125  | 1.362767573 | 3.282667071 | 1.980090358 |
| 0           | 5.442758793 | 0.896719932 | 0.462610884 | 0.909852314 |
| 6.347731428 | 3.158415253 | 0.068884878 | 0.068001041 | 1.238333341 |
| 0.034961618 | 5.887236206 | 1.726605625 | 0.031774291 | 0.027368032 |
| 0.023246688 | 4.583221474 | 0.021426192 | 3.92102707  | 1.675277556 |
| 0           | 3.876025836 | 0.99993317  | 1.877626697 | 1.905927791 |
| 0.428099642 | 3.819404404 | 0.368076833 | 0.360562129 | 0.282872093 |
| 0.100758341 | 4.810715982 | 0.091592274 | 3.60808826  | 0.076449587 |
| 0.025128895 | 3.938220122 | 2.110398728 | 0.022883905 | 1.08282174  |
| 0.09340054  | 4.778564632 | 0.085014378 | 1.304544565 | 1.920205886 |
| 0.022017339 | 4.641165103 | 0.020297612 | 0.020063106 | 1.072761264 |
| 0.227081522 | 5.896801839 | 0.201934715 | 1.682571406 | 2.30058559  |
| 3.545346806 | 2.400945646 | 0.015483421 | 0.015306505 | 0.013251901 |
| 0           | 3.415028062 | 0           | 1.962205547 | 1.551452782 |
| 0.079761254 | 3.971565948 | 0.072775523 | 1.262403583 | 0.061115443 |
| 1.122596892 | 5.391011891 | 0           | 0           | 1.136128086 |
| 0           | 4.779492087 | 0.982540587 | 0.982564158 | 0.983084852 |
| 0.093470715 | 2.391190107 | 0.085077196 | 0.083949628 | 1.290990103 |
| 0.142979323 | 4.463417497 | 0.129011239 | 3.589638334 | 1.428041667 |
| 0           | 6.900510725 | 0           | 0           | 1.376332372 |
| 0           | 4.46630564  | 2.125449628 | 1.198715498 | 0           |
| 0           | 4.001739106 | 0           | 0.574404395 | 2.360583546 |
| 0.163825184 | 5.335857811 | 0.147283968 | 4.996272998 | 2.90705522  |
| 0           | 5.545595998 | 0           | 0.889599698 | 0.892443995 |
| 0.111189483 | 3.506580299 | 0.100888592 | 2.003115528 | 2.411806037 |
| 0.074136829 | 1.876388823 | 0.06771136  | 2.63950564  | 1.856679266 |
| 0.019531377 | 3.802424501 | 0.018013894 | 0.01780686  | 1.661181403 |
| 0.011220386 | 5.419205172 | 0.010364161 | 1.038683137 | 2.047109767 |
| 0           | 4.456801425 | 4.43663475  | 0.708914784 | 2.178477405 |
| 0           | 3.574380871 | 0           | 2.692360626 | 0           |
| 0           | 3.268270135 | 0           | 0           | 1.544154017 |
| 0.029187742 | 2.724723009 | 2.127639814 | 3.841641581 | 1.697562012 |
| 0           | 3.289868729 | 0           | 2.777572716 | 2.294996215 |
| 0.113769455 | 5.638973844 | 0.103182631 | 1.366132081 | 1.984653929 |
| 6.587638987 | 3.616802739 | 0.087015564 | 4.23168364  | 1.927415105 |
| 0.01128227  | 1.631668374 | 0.010421207 | 2.37404825  | 1.629431348 |
| 0           | 5.919701331 | 0.564519031 | 0.564597613 | 1.704452788 |
| 4.816895166 | 4.000209734 | 1.119417434 | 0           | 0.634744744 |
| 5.257633183 | 2.474232972 | 3.479660905 | 2.960655099 | 1.711315273 |
| 4.408996433 | 7.67486988  | 6.136528434 | 0           | 0.956494813 |
| 0.08011032  | 5.308642009 | 0.073089485 | 2.329983076 | 1.876657803 |
| 0           | 5.336343818 | 0           | 0           | 1.544856375 |
| 0.087751235 | 5.607784633 | 0.079952281 | 1.921970157 | 0.066985786 |
| 2.814543579 | 3.410933713 | 1.165272816 | 2.20916808  | 2.196110831 |
| 7.618939999 | 4.19642878  | 3.024087241 | 0.004477386 | 1.01642345  |
| 0           | 3.843407862 | 0           | 1.870283181 | 1.469923488 |
| 1.175511275 | 4.717280716 | 0           | 1.851912087 | 1.188740045 |
| 0           | 5.592240074 | 1.274485529 | 0.749247661 | 0           |
| 0           | 1.902494983 | 0           | 3.713972753 | 1.503325485 |
| 3.852299228 | 3.066601956 | 0.049971529 | 1.800968024 | 0.042280253 |
| 0           | 5.641195217 | 0           | 1.520572937 | 0.948314409 |
| 0           | 1.559062558 | 2.555009865 | 0           | 1.973503488 |
| 6.885168425 | 5.285608247 | 0.89420918  | 0           | 2.184600693 |
| 0           | 3.49453167  | 0.696334921 | 0           | 1.60251756  |
| 7.058717943 | 4.52467175  | 0.035811993 | 1.131757983 | 0.030442663 |
| 2.866037932 | 5.550598723 | 1.34292008  | 1.343383669 | 2.31767429  |

| hsa-miR-615-3p | hsa-miR-1276 | hsa-miR-466 | hsa-miR-517-5p | hsa-miR-522-3p |
|----------------|--------------|-------------|----------------|----------------|
| 0.085547788    | 3.192754977  | 0.100560571 | 0.111331041    | 0.106653369    |
| 0.056071007    | 1.824225428  | 0.065239544 | 0.071696914    | 0.068904727    |
| 0.027298033    | 1.103457449  | 5.83802847  | 0.034318737    | 0.033082145    |
| 0.014261897    | 1.648680624  | 0.016355908 | 0.017794       | 0.01717583     |
| 0.092335526    | 0.075854444  | 0.108796319 | 0.120656847    | 0.115500418    |
| 0.039557922    | 1.756783668  | 3.932535606 | 0.050090849    | 0.048224312    |
| 2.120884563    | 0.099770748  | 0.146117992 | 0.163325148    | 0.155808603    |
| 0.01706452     | 1.06515519   | 0.019588939 | 0.021325488    | 0.020578737    |
| 0              | 1.503564551  | 0           | 0              | 0              |
| 1.148349887    | 1.140209908  | 0.043073876 | 0.047120238    | 0.045375306    |
| 4.36936429     | 0            | 0           | 0              | 0              |
| 0.168742769    | 1.580537246  | 0.204215087 | 0.23110183     | 0.219267706    |
| 0.085070444    | 1.937253973  | 0.099982846 | 0.110678057    | 0.106033408    |
| 4.497973315    | 2.29990277   | 0           | 0              | 0              |
| 0.14460226     | 0.116726381  | 0.173522212 | 0.195086408    | 0.185633125    |
| 0.033487528    | 2.154399781  | 0.038659962 | 0.042253093    | 0.040704436    |
| 3.294652107    | 0.574948357  | 0           | 1.38793117     | 0.564401208    |
| 0              | 1.103150927  | 0           | 2.804494764    | 1.536664008    |
| 0.062775044    | 1.231953715  | 0.073209806 | 3.164392401    | 0.077395383    |
| 0.182333461    | 1.621908247  | 0.221721119 | 0.25185667     | 0.238561767    |
| 0.13402542     | 0.10856703   | 5.47710894  | 2.670728688    | 0.171148136    |
| 0.212910366    | 0.168146939  | 0.261712698 | 0.299862387    | 0.282941277    |
| 1.089935422    | 0.018879082  | 6.56317225  | 0.028108984    | 0.027109784    |
| 0.113149092    | 1.403775097  | 0.134291851 | 5.616029953    | 3.189479211    |
| 1.430507784    | 2.037114816  | 0.133040432 | 0.148297729    | 0.141644093    |
| 0              | 0            | 0           | 0              | 0              |
| 0              | 2.973768328  | 0           | 0              | 0              |
| 1.192306192    | 0.040518024  | 0.056371633 | 0.061837305    | 0.059476499    |
| 1.888889124    | 0.055172844  | 0.077731132 | 0.085647221    | 0.082218997    |
| 0.031484329    | 1.722933076  | 0.036322206 | 0.039678886    | 0.038232549    |
| 0              | 0.96564562   | 0           | 0              | 0              |
| 0              | 1.584632605  | 0           | 0              | 0              |
| 0.542003092    | 1.028499986  | 0           | 0              | 0              |
| 0              | 1.701128738  | 0           | 2.441116309    | 0              |
| 0.075208764    | 0.062150541  | 0.08808983  | 0.097270741    | 0.093289639    |
| 0.203331159    | 0.161063947  | 0.249093112 | 0.284623967    | 0.268891262    |
| 0.097934938    | 1.353122003  | 3.102725224 | 0.128407362    | 0.122842903    |
| 2.903822504    | 0.823889412  | 0           | 0              | 0              |
| 0.06527233     | 0.05412638   | 7.210803232 | 0.08392018     | 0.080572327    |
| 2.412403495    | 1.065702023  | 1.670261712 | 0.021508554    | 0.020755085    |
| 0.077914541    | 0.064326155  | 0.091344901 | 0.100933649    | 0.096774008    |
| 0.051751142    | 1.806808557  | 2.600738069 | 0.066004029    | 0.063462755    |
| 1.377314987    | 0.080039222  | 4.62949299  | 0.12794946     | 0.122409362    |
| 0.046787339    | 1.174853217  | 0.054263061 | 3.600423173    | 0.057237589    |
| 0              | 2.504491091  | 0           | 0              | 0              |
| 0              | 0            | 0           | 0              | 1.492221552    |
| 1.472308674    | 3.533582868  | 0.147344539 | 0.164738835    | 1.495324695    |
| 0.144585494    | 0.116713491  | 2.702902295 | 0.195061764    | 0.185610044    |
| 0.088091115    | 1.319788531  | 0.103641941 | 0.114816486    | 0.109961444    |
| 0              | 0.870440911  | 0           | 0              | 0              |
| 0.002132223    | 0.001808598  | 1.008821389 | 0.002641633    | 0.002552999    |
| 0              | 1.863835424  | 0           | 0              | 0              |
| 0.042528506    | 0.035550456  | 0.049251107 | 0.053946702    | 0.051920279    |
| 0.016899648    | 1.660239335  | 0.019398575 | 0.021117419    | 0.020378299    |
| 0.011386424    | 0.009625553  | 5.714392582 | 0.014182657    | 0.013693956    |
| 0              | 0.780753801  | 4.98490751  | 10.59415263    | 7.621198356    |

|             |             |             |             |             |
|-------------|-------------|-------------|-------------|-------------|
| 0           | 0           | 0           | 0           | 0           |
| 0           | 0           | 5.27745895  | 0           | 0.864650795 |
| 0           | 0           | 0           | 0           | 0           |
| 0           | 2.34959079  | 0           | 0           | 0           |
| 0.027901484 | 2.129563813 | 0.03214902  | 2.148916396 | 0.033823293 |
| 5.003471531 | 1.797775127 | 0           | 0           | 0           |
| 0           | 1.211942492 | 0           | 1.56396797  | 0           |
| 1.029505386 | 0.00618043  | 4.745714735 | 0.009071355 | 0.008762411 |
| 1.554486554 | 0           | 0           | 0           | 0           |
| 0.051852278 | 2.827404666 | 0.060242852 | 0.066136979 | 0.063589902 |
| 0.048196969 | 0.040207807 | 0.055925209 | 0.061341917 | 0.059002388 |
| 0           | 0.986395467 | 2.301994272 | 0           | 0           |
| 0           | 1.979735888 | 0           | 3.295715517 | 1.977055011 |
| 0           | 1.443349854 | 0           | 0           | 0           |
| 1.911409692 | 0           | 0           | 0           | 0           |
| 1.176580092 | 1.166625466 | 4.722315085 | 0.056530547 | 0.05439569  |
| 0.150164866 | 0.120995582 | 3.34684094  | 0.203290547 | 0.193312149 |
| 0.001604555 | 2.329865501 | 0.001832144 | 6.076705404 | 3.817466626 |
| 0.253352685 | 1.827813976 | 0.315920116 | 0.366283366 | 0.343778548 |
| 0.007516114 | 0.006362761 | 0.008599669 | 0.00934088  | 0.00902256  |
| 0.228705547 | 0.179739169 | 4.833117876 | 0.325396431 | 0.306406371 |
| 0.011725455 | 0.009910928 | 0.013435306 | 0.014607823 | 0.014103986 |
| 0           | 0.834915081 | 0.826044688 | 0           | 0           |
| 0.071135042 | 1.261302245 | 0.083200553 | 0.091778215 | 0.088060962 |
| 0           | 3.229197377 | 1.903752688 | 0           | 0.927606142 |
| 0           | 0           | 0           | 0           | 0           |
| 3.005726501 | 1.14111521  | 0.043363406 | 0.047439808 | 0.04568186  |
| 0.981945063 | 0.982776751 | 0.981588355 | 1.975713034 | 0           |
| 3.395912521 | 0           | 0           | 0           | 0           |
| 0.054213495 | 0.045130921 | 0.063037704 | 0.069245453 | 0.066561929 |
| 0.170171435 | 0.13622747  | 0.206047618 | 2.836988435 | 1.675791851 |
| 0.114260099 | 1.407433763 | 2.118359383 | 2.577778664 | 1.458422161 |
| 0           | 0.689850653 | 0.677296244 | 0           | 0           |
| 0           | 0           | 5.765544895 | 0           | 0           |
| 0.505152361 | 0.979341438 | 6.803119826 | 0           | 4.848184305 |
| 0.024840386 | 0.020896655 | 6.105401246 | 0.031184152 | 0.030068144 |
| 0           | 0           | 0           | 0           | 0           |
| 0.001188714 | 1.590353953 | 0.001357127 | 2.00647275  | 1.004903594 |
| 0.053913158 | 1.200463428 | 0.062681957 | 0.068849587 | 0.066183522 |
| 0           | 2.659288847 | 0           | 1.845001411 | 0.884331078 |
| 0.782869975 | 1.729295464 | 0           | 0           | 0           |
| 0           | 0           | 0           | 0           | 0           |
| 0.054964517 | 2.840880311 | 0.063927603 | 0.07023597  | 0.067508652 |
| 0.260857273 | 0.203011908 | 0.326146299 | 0.378992329 | 0.355344546 |
| 0           | 1.42051656  | 0           | 1.805180104 | 0           |
| 0           | 0.920909715 | 3.679488674 | 0           | 0           |
| 0.863092338 | 1.428142622 | 0           | 0           | 0           |
| 4.90365392  | 1.709974205 | 0           | 0           | 0           |
| 0.020872572 | 0.017583985 | 0.023991812 | 0.026142379 | 0.025217106 |
| 0.003841724 | 1.602333091 | 0.004390009 | 0.004764264 | 0.004603616 |
| 0.022560161 | 0.018994084 | 0.025946696 | 0.028283892 | 0.027278088 |
| 0.796545795 | 0.803980934 | 0           | 0           | 0.795079841 |
| 0           | 2.301295432 | 0           | 6.875698074 | 6.513599855 |
| 0.086547495 | 1.314520653 | 0.101771122 | 0.112699801 | 0.107952697 |
| 2.230778201 | 0           | 0           | 0           | 0           |
| 0           | 1.340551217 | 0           | 0           | 0           |
| 0.668847593 | 1.192240226 | 0           | 0           | 0           |
| 0           | 1.893374816 | 0           | 3.560443557 | 1.475318284 |

|             |             |             |             |             |
|-------------|-------------|-------------|-------------|-------------|
| 1.19355591  | 1.182469076 | 0.056753407 | 0.062261027 | 0.059881991 |
| 0.605998017 | 1.112138704 | 0           | 0           | 0           |
| 0.090794255 | 0.07462768  | 6.954185805 | 3.312655402 | 0.113486398 |
| 0.903445354 | 0           | 0           | 0           | 0           |
| 0.061818199 | 0.051324125 | 0.072069983 | 9.100813422 | 6.730488322 |
| 0.029083431 | 1.712751275 | 0.033524577 | 0.036601558 | 0.035276186 |
| 0.019423688 | 0.01637197  | 5.118799259 | 0.024307134 | 0.023450306 |
| 7.070298455 | 1.931337064 | 0           | 0           | 0           |
| 0.311288419 | 0.238688849 | 2.192605082 | 0.467699978 | 2.215587341 |
| 0.08180499  | 0.067447308 | 4.266975058 | 0.106221057 | 0.101800057 |
| 0.020981441 | 0.017675004 | 0.024117855 | 2.112545988 | 1.086067793 |
| 0.076034618 | 1.902738057 | 0.089082695 | 0.098387477 | 0.094352162 |
| 0.01840506  | 0.015519112 | 0.021137556 | 0.02301873  | 0.022209638 |
| 0.176336809 | 0.140883395 | 0.213976634 | 0.242655684 | 0.23001636  |
| 1.056609873 | 0.011869333 | 0.016116711 | 7.615458417 | 4.673689131 |
| 0           | 0           | 0           | 3.277801497 | 0           |
| 0.065256151 | 0.05411327  | 0.076168884 | 0.08389857  | 0.08055172  |
| 0           | 1.527429667 | 0           | 4.167258829 | 2.72234289  |
| 0           | 0           | 0           | 0           | 0           |
| 0.076089799 | 0.062859389 | 0.089149054 | 0.098462132 | 0.094423186 |
| 0.114334655 | 0.093227899 | 5.757738264 | 0.151410405 | 0.144580857 |
| 0           | 1.689413696 | 0           | 0           | 0           |
| 0           | 0           | 0           | 0           | 0           |
| 2.789880507 | 2.202237916 | 0           | 0           | 0           |
| 0.130040621 | 0.105478638 | 6.432129123 | 0.173872811 | 1.52011532  |
| 0           | 1.460754059 | 0.889304009 | 1.852413452 | 0.889784107 |
| 0.089933327 | 1.326060825 | 0.105877254 | 0.117347743 | 0.112362719 |
| 3.11989137  | 2.270973575 | 0.070834246 | 0.077935982 | 0.074863052 |
| 0.016342319 | 2.077035195 | 0.018755231 | 0.020414366 | 0.019700975 |
| 0.009417983 | 1.03616046  | 1.038869785 | 0.01171741  | 0.011315919 |
| 1.229328348 | 2.769736849 | 0           | 1.602397365 | 0.710405895 |
| 0           | 2.222874938 | 4.045950984 | 0           | 0           |
| 2.275625527 | 0           | 0           | 0           | 0           |
| 0.024333118 | 0.020473671 | 4.539478088 | 0.030538281 | 0.029446928 |
| 0           | 1.561580687 | 0           | 0           | 0           |
| 0.091934356 | 0.075535257 | 0.108308495 | 2.470754471 | 0.114975906 |
| 0.077791799 | 1.28442729  | 6.653821099 | 7.683754285 | 6.188951385 |
| 0.009469703 | 1.036357668 | 5.228659525 | 0.011782112 | 0.011378344 |
| 0           | 0           | 0           | 0           | 0           |
| 0           | 1.523189586 | 0           | 7.420355671 | 6.281485481 |
| 0.027386526 | 0.023017424 | 0.031550059 | 6.365575965 | 4.755132983 |
| 3.412576186 | 0.510414893 | 0           | 5.312576314 | 3.899434227 |
| 1.257286833 | 0.054337858 | 0.076499785 | 0.084268858 | 0.080904816 |
| 0           | 0.48154523  | 0           | 0           | 0           |
| 0.071583215 | 2.644095212 | 0.083737778 | 0.092381176 | 0.088635185 |
| 0.040643113 | 0.033997242 | 0.047036997 | 4.249811338 | 2.546251932 |
| 0.004119655 | 0.003491833 | 0.004708056 | 8.68191975  | 7.945498314 |
| 0           | 2.200244264 | 0           | 0           | 0           |
| 0           | 0           | 0           | 1.551036922 | 0.674758776 |
| 0           | 0.760202969 | 0           | 0           | 0.750362099 |
| 0           | 1.973410836 | 0           | 2.364114001 | 0.448276637 |
| 0.045025207 | 2.531595344 | 0.052187534 | 5.490979587 | 3.726632563 |
| 0           | 1.525774565 | 0           | 0           | 0           |
| 4.554742462 | 0.979803511 | 0           | 0           | 0           |
| 0           | 0.900052786 | 0           | 8.788012235 | 6.947911177 |
| 3.125446081 | 0.708629817 | 0           | 1.584732071 | 0.698097608 |
| 0.032364868 | 2.149436284 | 1.132590688 | 8.784571267 | 7.421129096 |
| 0.805550885 | 1.758867392 | 0           | 5.599867506 | 4.26401032  |

| hsa-miR-518c-5p | hsa-miR-20b-5p | hsa-miR-6514-5p | hsa-miR-548x-3p | hsa-miR-524-5p |
|-----------------|----------------|-----------------|-----------------|----------------|
| 0.111966889     | 5.874933023    | 1.928815184     | 0.069417198     | 0.095742228    |
| 1.224738873     | 7.655909479    | 2.57121263      | 0.045999869     | 0.062318276    |
| 1.110183149     | 6.731081915    | 1.101296569     | 0.022641571     | 0.030134378    |
| 1.057764606     | 6.601394323    | 2.065570801     | 0.011888978     | 0.015695433    |
| 0.121358414     | 5.250984673    | 0.070965505     | 0.074738946     | 0.103504282    |
| 0.050343082     | 3.40483606     | 1.145378405     | 0.032656392     | 0.043794515    |
| 0.164352133     | 3.240879212    | 1.42345123      | 2.071369343     | 0.138532444    |
| 1.669190461     | 4.43059651     | 1.65907263      | 0.014209804     | 0.018792176    |
| 0               | 6.128158381    | 1.505388571     | 0               | 0              |
| 0.047355972     | 5.628728948    | 2.980775646     | 0.030788202     | 0.041230655    |
| 0               | 4.609488959    | 1.09197128      | 1.457357686     | 0              |
| 0.232729756     | 4.238596234    | 0.125517068     | 0.132935996     | 0.192587509    |
| 0.111309377     | 5.265793072    | 1.301874649     | 0.069041971     | 0.09519729     |
| 0               | 5.853118294    | 1.565285766     | 0               | 0              |
| 0.196382108     | 4.619108217    | 2.132560054     | 1.502169606     | 0.164100974    |
| 0.042462214     | 4.795735803    | 0.026435551     | 0.027709304     | 1.13650699     |
| 0.570365235     | 5.062435614    | 1.065407217     | 1.059032579     | 0              |
| 1.54335629      | 3.415360807    | 1.115494267     | 0               | 0.749909264    |
| 2.326748794     | 4.968650407    | 1.843589962     | 1.230762672     | 0.069879613    |
| 0.253689406     | 5.973664762    | 0.13487094      | 0.142977105     | 0.208764749    |
| 0.180802623     | 5.77568604     | 1.458762253     | 3.371953919     | 0.151719653    |
| 0.302206521     | 1.828057402    | 0.155559979     | 0.165248735     | 0.245531376    |
| 0.02824373      | 5.502099776    | 1.083526782     | 0.018632683     | 0.024723771    |
| 3.42713951      | 5.91543996     | 2.459815734     | 0.090897856     | 1.448588365    |
| 0.149205463     | 7.381670237    | 0.085436497     | 0.090115596     | 1.444714883    |
| 0               | 3.398036881    | 0               | 0               | 0              |
| 3.138349085     | 6.977014179    | 1.975994141     | 0               | 0              |
| 0.062156687     | 5.949108432    | 1.788298783     | 0.03996342      | 0.053892138    |
| 0.08611207      | 5.362019967    | 1.239554701     | 0.054394178     | 0.074163987    |
| 0.039874143     | 5.816152494    | 2.141402984     | 0.026071776     | 0.034789964    |
| 0               | 4.521969414    | 0.511487628     | 0               | 0              |
| 0               | 6.845004303    | 1.58464041      | 0               | 0              |
| 2.251493381     | 6.856434396    | 1.036841029     | 0               | 0              |
| 2.227882353     | 4.058031087    | 0.773222084     | 0               | 0.758963186    |
| 0.097811164     | 5.263447739    | 0.058246068     | 0.061260909     | 0.083966268    |
| 2.510950986     | 5.194942792    | 1.663531686     | 4.257808806     | 0.233957714    |
| 0.129165019     | 5.22446169     | 0.075083052     | 0.079109597     | 0.109925945    |
| 1.750963932     | 4.736183582    | 1.377988037     | 2.926506311     | 0              |
| 0.084374055     | 4.982971759    | 2.280683947     | 0.053364118     | 0.072702318    |
| 0.0216101       | 7.505160895    | 0.013689995     | 0.014329769     | 0.018952542    |
| 0.101498509     | 4.159170347    | 0.060268277     | 0.063401364     | 0.08704261     |
| 0.066347963     | 2.604637955    | 0.040508829     | 0.042525097     | 0.057458555    |
| 0.128703765     | 5.163195075    | 0.074841105     | 0.078852677     | 0.109547285    |
| 4.991074142     | 6.635695356    | 0.036707176     | 1.173996736     | 1.189799098    |
| 0               | 5.594829568    | 0.940149109     | 0               | 0              |
| 0.925563429     | 5.046895969    | 0.929927845     | 0.928939927     | 0              |
| 0.165777299     | 5.361996289    | 1.426552668     | 3.529140706     | 1.488686075    |
| 0.196357247     | 5.215255893    | 1.491196977     | 2.58321365      | 0.164081299    |
| 0.11547667      | 6.147414766    | 0.067831039     | 1.946287851     | 0.098647749    |
| 0               | 3.781051815    | 1.838900244     | 0               | 0              |
| 0.002653557     | 5.769021595    | 1.008072722     | 0.001785913     | 0.002339842    |
| 0               | 6.90302778     | 2.127181187     | 0.668846486     | 0              |
| 0.054220642     | 3.421794013    | 1.155932061     | 2.519258024     | 0.047116233    |
| 0.021217028     | 5.357418093    | 1.063230869     | 0.014073415     | 0.018609889    |
| 0.014248474     | 5.028130855    | 1.042790863     | 0.009502574     | 0.012522439    |
| 9.407311031     | 5.224761119    | 0.784055714     | 0               | 7.356980982    |



|             |             |             |             |             |
|-------------|-------------|-------------|-------------|-------------|
| 0           | 4.522975029 | 1.105823255 | 0           | 0           |
| 0.866626619 | 5.167885386 | 0           | 0           | 0.864230824 |
| 0.70847534  | 6.363263451 | 1.244117173 | 1.239167036 | 0           |
| 0           | 3.349818008 | 2.361057265 | 2.352133178 | 0           |
| 0.035260683 | 5.177950713 | 1.103486389 | 1.105211024 | 0.030804912 |
| 0           | 3.32203515  | 0           | 0           | 0           |
| 0           | 5.277939731 | 0.698480975 | 0           | 0           |
| 0.009112943 | 5.906108372 | 1.617044171 | 0.006102103 | 0.008020755 |
| 0           | 3.866491465 | 0.976141501 | 0           | 0           |
| 1.208032592 | 5.128921542 | 0.040586109 | 0.042606576 | 0.057572218 |
| 0.061658405 | 4.883767575 | 2.211775707 | 0.039657813 | 0.053467585 |
| 0.985712678 | 6.085030806 | 0           | 0           | 0           |
| 2.78209365  | 7.247975231 | 1.566322237 | 0           | 2.782936653 |
| 0           | 5.512379429 | 1.081541116 | 0.588322968 | 0           |
| 0           | 5.278914641 | 1.509042739 | 0           | 0           |
| 0.056819215 | 4.078552106 | 0.034959814 | 0.036678018 | 0.049338256 |
| 0.204659349 | 6.974027213 | 1.508144754 | 0.119063652 | 0.170636925 |
| 6.03300542  | 3.179814725 | 1.006077519 | 1.00617004  | 2.008596042 |
| 0.369422668 | 5.670868759 | 0.18220874  | 0.19405987  | 0.294953503 |
| 1.62227146  | 6.093998831 | 2.034883277 | 0.006282089 | 0.008258451 |
| 0.32803415  | 6.415738079 | 0.166061959 | 0.176586459 | 0.264725857 |
| 0.014675682 | 6.121388209 | 0.009351817 | 0.009784219 | 0.012896325 |
| 0           | 3.806111015 | 0           | 3.857137284 | 0           |
| 1.926081603 | 6.831279004 | 0.055192364 | 1.259928886 | 0.079341965 |
| 0.928664132 | 4.527160698 | 0.932872299 | 1.914332196 | 1.496888561 |
| 0           | 6.114342007 | 0           | 0           | 0           |
| 0.047677308 | 4.481210626 | 0.029555065 | 2.986399583 | 0.041506667 |
| 0.981919804 | 5.014966244 | 0           | 0.982847336 | 0           |
| 0           | 5.639096647 | 1.43928812  | 0           | 0           |
| 0.069608752 | 4.329357528 | 1.196973755 | 0.044507111 | 0.060227424 |
| 3.188467813 | 5.764886454 | 0.126505063 | 3.270407116 | 0.194283327 |
| 0.152235986 | 5.716398267 | 1.396750133 | 0.091753756 | 0.128744177 |
| 0           | 3.910169653 | 0.694024458 | 0           | 0           |
| 0           | 5.643036083 | 0.756279562 | 3.232648818 | 0           |
| 1.808746997 | 9.040742864 | 1.348420037 | 0           | 0           |
| 0.031334694 | 6.182982572 | 0.019689082 | 0.020622676 | 0.027405488 |
| 0           | 4.2697227   | 0           | 0           | 0           |
| 2.814497049 | 5.59283902  | 1.590225909 | 0.000996016 | 0.001304172 |
| 0.069210508 | 5.86016185  | 1.195928175 | 0.044265556 | 0.05988953  |
| 1.443847956 | 6.14740176  | 1.864151732 | 0           | 0           |
| 0           | 4.334489149 | 1.337723027 | 0           | 0           |
| 0           | 5.192512344 | 1.96061035  | 0           | 0           |
| 1.220359939 | 5.897482246 | 0.042960747 | 0.045110905 | 0.06107257  |
| 0.382295483 | 4.816241828 | 0.187068676 | 0.199328843 | 0.30422432  |
| 0           | 4.619307838 | 1.423988851 | 0           | 0           |
| 0           | 5.033368654 | 0           | 2.480768094 | 0           |
| 0           | 4.980523369 | 2.153320898 | 0           | 0           |
| 0           | 4.370975028 | 2.275041891 | 0           | 0           |
| 0.026267133 | 8.393798575 | 0.016575105 | 0.017355164 | 0.023006412 |
| 0.004785881 | 7.753538845 | 1.601917357 | 0.003215603 | 0.004217501 |
| 2.120681583 | 6.05302737  | 1.68229813  | 0.01874612  | 0.024876422 |
| 2.029147632 | 5.459548326 | 0           | 0           | 0           |
| 7.437654833 | 5.084262559 | 0.653331856 | 0           | 5.227081111 |
| 0.113345174 | 6.16807272  | 0.066688217 | 0.070202624 | 0.096883892 |
| 0           | 4.076201252 | 0           | 0           | 0.359624137 |
| 0           | 5.704537987 | 2.057041756 | 0           | 0           |
| 0           | 6.694967354 | 0           | 0           | 0           |
| 2.865727844 | 8.868577974 | 1.896032549 | 4.585522117 | 0           |

|             |             |             |             |             |
|-------------|-------------|-------------|-------------|-------------|
| 0.062582888 | 5.979679074 | 0.038326418 | 0.040224639 | 0.054255181 |
| 0           | 3.950295811 | 2.616472362 | 0           | 0           |
| 3.686635683 | 4.338153224 | 0.069828623 | 3.991839457 | 0.10173962  |
| 0           | 4.247619706 | 1.286529883 | 0           | 0           |
| 7.574070525 | 7.893865991 | 1.223287431 | 3.457180912 | 5.048933612 |
| 0.036780433 | 5.139318606 | 0.023006285 | 0.024105849 | 0.032118802 |
| 2.431030643 | 3.287496057 | 1.669080047 | 2.414972456 | 0.021402093 |
| 0           | 6.008229746 | 0.557511479 | 0           | 0.538741352 |
| 0.472252978 | 5.78068726  | 0.219080144 | 0.234144257 | 0.367340722 |
| 0.106821716 | 5.300481834 | 0.063167442 | 1.296652957 | 0.091472686 |
| 0.026405856 | 4.834602343 | 0.016660701 | 3.273499651 | 0.023127004 |
| 0.098935319 | 4.778515393 | 0.058863796 | 0.061914663 | 0.084904814 |
| 0.023127788 | 5.791995586 | 0.014632709 | 0.015318113 | 0.020274842 |
| 0.244396416 | 5.687250372 | 0.130755996 | 0.138557642 | 0.201614378 |
| 5.448840773 | 4.259346252 | 1.052704496 | 2.876833673 | 2.887642485 |
| 3.277806201 | 2.543450674 | 0.973234764 | 0           | 0.970953701 |
| 0.084352309 | 8.295046217 | 0.050765961 | 0.053351213 | 0.07268402  |
| 2.721367039 | 5.943945775 | 1.536760808 | 0           | 2.242982356 |
| 0           | 6.685871125 | 1.566141326 | 0           | 0           |
| 0.099010471 | 4.84991972  | 0.058905054 | 0.06195833  | 0.084967536 |
| 0.152342425 | 5.312596103 | 1.396987337 | 0.091811169 | 0.128830447 |
| 0           | 5.600643355 | 1.949322355 | 0           | 0           |
| 0           | 6.897572963 | 0.705978187 | 0           | 0           |
| 0           | 5.954091601 | 1.454741946 | 0           | 0           |
| 2.192541514 | 6.618211913 | 0.09831682  | 2.096871008 | 0.147070713 |
| 0           | 5.545651313 | 0.897337182 | 0           | 0           |
| 0.118025769 | 4.926633224 | 0.069192918 | 0.072858529 | 0.100754462 |
| 0.078352345 | 5.661401394 | 2.262834127 | 0.049775058 | 0.067627108 |
| 0.0205105   | 5.391398769 | 1.061172774 | 0.013612238 | 0.017993793 |
| 0.01177147  | 3.643883012 | 1.62624442  | 0.007865849 | 0.010352802 |
| 0.714550196 | 5.98527762  | 0.724721595 | 0           | 0           |
| 0.920650952 | 4.776148433 | 0           | 0           | 0           |
| 0           | 5.33520707  | 1.546720557 | 0           | 0           |
| 2.458057951 | 5.857491468 | 2.435002734 | 0.020205494 | 0.026842628 |
| 0.979159866 | 5.010452297 | 1.562125632 | 0           | 0           |
| 1.365695244 | 7.29846867  | 0.070669738 | 0.074425139 | 0.103044845 |
| 7.256972168 | 5.170282646 | 0.060176648 | 2.933850185 | 4.677312151 |
| 0.011836479 | 5.616690306 | 2.630583999 | 0.007908886 | 0.010409783 |
| 0           | 5.210151542 | 1.069740733 | 0           | 0           |
| 6.613801434 | 4.557511488 | 0.646709445 | 0.643163575 | 5.082063859 |
| 6.424176018 | 4.758461008 | 1.702447838 | 1.70483887  | 4.861630974 |
| 5.233974548 | 10.26570612 | 1.630550257 | 3.929338243 | 3.303211275 |
| 0.084724943 | 5.688932129 | 1.236031007 | 0.053572286 | 0.072997529 |
| 0           | 5.282570596 | 0.486720066 | 0           | 0           |
| 0.092889443 | 6.371264072 | 1.256628893 | 0.058386226 | 0.07985028  |
| 2.214660259 | 7.027292706 | 0.031977524 | 1.151827405 | 0.045007443 |
| 10.11880238 | 5.312510843 | 0.003297673 | 3.190817562 | 6.468025432 |
| 0           | 5.160428996 | 1.47678207  | 0           | 0.901364562 |
| 3.83587609  | 6.70797975  | 0.689675151 | 0           | 0.672771188 |
| 0           | 5.614311007 | 1.300456776 | 0.760967088 | 0           |
| 1.704131018 | 5.757321603 | 1.542286919 | 3.584268462 | 0           |
| 4.980634223 | 5.838361035 | 0.035353457 | 1.778221507 | 2.231747547 |
| 0           | 6.252769124 | 0           | 0           | 0           |
| 0           | 8.557322987 | 1.975404521 | 0           | 0           |
| 8.514606202 | 4.151913543 | 0.901772325 | 0           | 5.769044381 |
| 0.702406372 | 6.667823313 | 1.236507473 | 0           | 0           |
| 8.213431282 | 4.904846336 | 0.02556272  | 3.326919722 | 5.944482199 |
| 5.397042155 | 5.423346824 | 2.078552584 | 0           | 3.159845936 |

| hsa-miR-6844 | hsa-miR-653-5p | hsa-miR-1229-3p | hsa-miR-509-3p | hsa-miR-146b-5p |
|--------------|----------------|-----------------|----------------|-----------------|
| 0.065449497  | 3.814575621    | 1.334827443     | 0.111039425    | 10.98936609     |
| 1.8169562    | 3.127756515    | 1.845290004     | 3.919604357    | 12.49751948     |
| 2.447798331  | 4.170327769    | 1.714786469     | 4.25791879     | 12.67528064     |
| 1.646930004  | 6.115595425    | 2.397837822     | 2.89202163     | 12.19943979     |
| 0.070424544  | 5.007191222    | 1.360284928     | 3.089518726    | 12.46733996     |
| 0.030920835  | 3.232518217    | 1.771146859     | 6.535568723    | 12.55676364     |
| 2.491471479  | 4.279288655    | 1.472340785     | 0.16285457     | 15.65990827     |
| 0.013483972  | 5.75473278     | 1.666839415     | 0.021279263    | 12.37098298     |
| 1.915775959  | 4.467765       | 0               | 2.699736679    | 12.21452867     |
| 3.633963649  | 4.877588311    | 4.960658073     | 3.023924553    | 15.41132235     |
| 0            | 6.847029758    | 0               | 1.942166147    | 12.86109201     |
| 1.561759983  | 4.840923426    | 1.636828695     | 2.363856118    | 11.63116279     |
| 0.065098494  | 3.481487219    | 2.741349936     | 0.110388515    | 9.75163616      |
| 2.978021822  | 2.780709933    | 2.560417637     | 2.558830289    | 11.6679065      |
| 1.489650783  | 5.409665227    | 0.148272805     | 1.572381767    | 14.09441904     |
| 1.123346216  | 4.457001498    | 2.168813244     | 3.370076075    | 9.077844364     |
| 0.580421666  | 6.5636492      | 1.395178644     | 0              | 11.22364686     |
| 0            | 4.997249558    | 0.75391448      | 1.541226426    | 12.02849006     |
| 0.048534431  | 4.183316616    | 1.248275531     | 1.252267452    | 13.19340059     |
| 1.601348359  | 5.657902742    | 1.684220402     | 2.892131887    | 14.48983803     |
| 0.100341093  | 9.2944261      | 0.137363491     | 3.297401594    | 12.63705452     |
| 1.687946458  | 3.384189376    | 0.218964951     | 2.553655376    | 11.95216742     |
| 1.083323029  | 3.597048207    | 0.022866365     | 2.447758032    | 13.93916108     |
| 0.085495273  | 4.456996382    | 2.529165499     | 2.917035944    | 11.95622944     |
| 0.084766908  | 5.412274044    | 0.114816036     | 1.446216697    | 12.66500454     |
| 1.233634589  | 2.336256678    | 2.543556842     | 2.335164151    | 10.78547489     |
| 2.29733592   | 4.288744889    | 1.973316013     | 4.214867811    | 12.58573192     |
| 1.787658704  | 5.20933437     | 1.193389372     | 3.283366536    | 13.42967995     |
| 0.051373389  | 2.955169287    | 1.262801673     | 3.978439383    | 12.64376685     |
| 0.024705288  | 1.126662032    | 2.159040603     | 1.127463385    | 11.57301226     |
| 0.512105202  | 5.338879768    | 4.04899186      | 0.944616037    | 11.72137154     |
| 1.999660328  | 4.321456528    | 1.999620623     | 5.976799119    | 15.5810049      |
| 0            | 3.930451274    | 2.27983585      | 1.870731614    | 8.788505681     |
| 3.005812796  | 5.58845373     | 1.988906846     | 2.792044826    | 12.97118758     |
| 1.268123929  | 5.982784372    | 2.36397921      | 3.428960596    | 13.29647861     |
| 0.147825643  | 8.04784854     | 2.433708133     | 4.064904616    | 13.58501408     |
| 0.074506102  | 3.724219629    | 2.02493363      | 1.390727638    | 13.82054424     |
| 1.779558749  | 3.032255689    | 2.325936423     | 3.86860028     | 12.75360402     |
| 0.050406515  | 3.844202817    | 1.885764466     | 6.551270128    | 13.42583819     |
| 2.402458809  | 4.108541543    | 2.678091787     | 4.196112422    | 12.25128018     |
| 1.899648521  | 4.551673072    | 4.313696602     | 3.015178011    | 15.41474198     |
| 1.187886605  | 3.300949943    | 3.079276741     | 1.208487851    | 12.96576728     |
| 1.342096452  | 4.475923266    | 2.023561904     | 3.11634914     | 12.94097699     |
| 0.036446387  | 4.610624597    | 2.561983211     | 2.246586697    | 12.03021651     |
| 3.090484713  | 4.145028687    | 3.079119192     | 0.936085543    | 12.40990966     |
| 0            | 5.49111576     | 1.494785689     | 0.925270198    | 12.67027094     |
| 2.061301958  | 5.80871733     | 2.573237681     | 0.164263009    | 12.95924509     |
| 0.10775121   | 3.583239407    | 1.551302184     | 2.258325727    | 15.36860513     |
| 0.067317146  | 4.323403445    | 0.090101253     | 2.005167732    | 10.87558101     |
| 2.156319493  | 6.057656893    | 3.261802942     | 2.603403728    | 13.0705682      |
| 0.001697211  | 4.968184939    | 2.333441955     | 2.011608892    | 13.40478073     |
| 0.672769702  | 4.855871264    | 0               | 1.818742907    | 11.90184605     |
| 0.033195846  | 6.745553477    | 1.784631562     | 5.395410185    | 9.778538659     |
| 1.658156497  | 4.567396072    | 2.900027774     | 0.021071668    | 12.03124863     |
| 1.042690127  | 2.061330509    | 1.046138696     | 1.641524068    | 13.06138822     |
| 1.723060171  | 4.782550352    | 2.260008438     | 1.993203215    | 11.83606115     |

|             |             |             |             |             |
|-------------|-------------|-------------|-------------|-------------|
| 0.611259374 | 5.102186472 | 0           | 0.599435062 | 12.69826069 |
| 0           | 2.605327564 | 0.865569634 | 0           | 10.14518325 |
| 0.719155702 | 5.989951701 | 0.704507558 | 0           | 13.65829754 |
| 2.718338108 | 3.440327072 | 1.851099391 | 2.474020165 | 11.87520761 |
| 0.021931654 | 5.879574923 | 0.028460947 | 4.17367997  | 10.86493361 |
| 0           | 4.632200441 | 0           | 5.116408081 | 9.702098562 |
| 1.219380831 | 5.303273662 | 1.572504078 | 2.808738523 | 12.63510687 |
| 0.00579602  | 3.746468498 | 0.00743956  | 3.504939352 | 12.26280444 |
| 1.557066458 | 4.418346463 | 1.554299368 | 0.974399284 | 11.8243394  |
| 1.188238857 | 5.02118587  | 2.586519013 | 2.60625398  | 11.58686323 |
| 0.037519426 | 4.544379382 | 2.239398539 | 0.061196645 | 11.4710671  |
| 0           | 5.064229449 | 0           | 1.98080499  | 11.77509951 |
| 1.566373716 | 7.503269853 | 2.976195497 | 3.295717879 | 11.13906783 |
| 0           | 5.251665688 | 1.948685691 | 1.051232646 | 13.23996202 |
| 0.935693651 | 4.531896899 | 0           | 0           | 13.26136129 |
| 0.034712377 | 4.361093871 | 1.793605062 | 0.056398034 | 11.65027244 |
| 1.506476617 | 4.646671443 | 0.154014246 | 4.840191513 | 13.46582132 |
| 0.00127753  | 4.010298105 | 2.593817637 | 2.331094191 | 11.63330859 |
| 0.180532562 | 4.093003387 | 1.924055511 | 0.364850194 | 10.38877082 |
| 2.357613113 | 4.633629846 | 3.850378261 | 0.009321194 | 13.28039272 |
| 0.164570578 | 4.185269557 | 1.84223835  | 0.324191321 | 14.69542592 |
| 0.009289347 | 6.434569058 | 0.011951776 | 2.65334312  | 14.19851134 |
| 0.83787364  | 2.330736938 | 0           | 0.82875615  | 15.83365578 |
| 0.054784708 | 4.750750618 | 1.911252336 | 1.927048968 | 11.75281186 |
| 1.916271592 | 5.609442702 | 2.486202697 | 0           | 12.89915533 |
| 0           | 5.218300194 | 0.855888974 | 1.804758264 | 11.79131483 |
| 0.029348342 | 3.813065845 | 0.038278284 | 4.037128665 | 12.21860483 |
| 0           | 5.992664229 | 1.563245075 | 2.558667242 | 12.71471384 |
| 0           | 2.96790538  | 1.829149578 | 3.377790659 | 10.00804039 |
| 2.235566974 | 4.026441495 | 1.215268683 | 0.069078717 | 13.75507796 |
| 0.125438532 | 3.909689552 | 0.174686583 | 5.337788786 | 12.16928914 |
| 1.395531124 | 4.462815139 | 0.117003571 | 3.432559031 | 12.80980184 |
| 0           | 4.529922725 | 2.965724299 | 2.491897506 | 10.79835557 |
| 0.756706826 | 3.741240566 | 1.269233916 | 1.648178578 | 10.98529361 |
| 0.522225187 | 4.178653097 | 1.82697367  | 3.501251411 | 12.40956558 |
| 1.691527614 | 4.404439517 | 1.100009536 | 4.325787414 | 13.89498046 |
| 0           | 4.340021663 | 1.545888521 | 0           | 12.19217993 |
| 1.004493719 | 5.708316249 | 1.590746789 | 3.007256699 | 13.28107278 |
| 0.041856265 | 3.780473156 | 2.864364791 | 3.780181706 | 10.28128181 |
| 0           | 7.274677541 | 1.850176317 | 1.443408967 | 12.47408352 |
| 2.049174703 | 4.029313452 | 2.275242014 | 3.23342071  | 12.71016171 |
| 0           | 4.337810792 | 0           | 3.269684728 | 13.15197621 |
| 2.23860171  | 3.91374589  | 3.614520974 | 1.221269376 | 11.98296032 |
| 0.18533563  | 4.511870667 | 1.948686579 | 2.02042439  | 14.90433752 |
| 0           | 4.406323404 | 0.856100445 | 1.407274914 | 10.08998071 |
| 0           | 3.569250973 | 0.917066534 | 3.454496222 | 13.42477222 |
| 0           | 5.384783606 | 0.862614977 | 4.097618555 | 11.27277068 |
| 1.489945361 | 4.603014665 | 1.862295469 | 1.838463447 | 10.81884384 |
| 0.016462509 | 6.13536674  | 1.68477956  | 1.084732963 | 12.02940613 |
| 1.014491691 | 3.483473818 | 0.003914469 | 2.020888388 | 12.92929208 |
| 0.017778986 | 4.390422591 | 1.692692484 | 4.390112699 | 12.43201058 |
| 0           | 5.267863982 | 0.795915421 | 4.656919679 | 10.7081903  |
| 1.847071327 | 5.377151834 | 2.44791191  | 1.788774765 | 11.92891237 |
| 0.066184121 | 3.059339873 | 2.414479187 | 3.05984604  | 11.77536085 |
| 0.378159377 | 3.806608383 | 1.337475835 | 3.719891733 | 9.654933999 |
| 0           | 4.851606973 | 1.326484852 | 2.485267068 | 13.76759059 |
| 1.199936821 | 5.563385013 | 0           | 1.83593674  | 11.53482519 |
| 1.487365215 | 4.10505864  | 2.20250025  | 3.445726988 | 10.17635314 |

|             |             |             |             |             |
|-------------|-------------|-------------|-------------|-------------|
| 3.684404546 | 2.256491932 | 3.722482435 | 2.25734858  | 16.68177324 |
| 2.451865298 | 4.878474517 | 3.755215023 | 1.978231231 | 12.88416915 |
| 1.319863556 | 7.178665741 | 0.092877284 | 1.362737489 | 12.15173759 |
| 1.287912946 | 4.005122895 | 1.520690186 | 0           | 10.86364203 |
| 0.047815995 | 5.079108055 | 1.244599533 | 3.356514716 | 12.79002012 |
| 1.107501075 | 4.504686418 | 1.116856433 | 1.727957684 | 13.42621527 |
| 1.072353451 | 2.697234566 | 1.078403773 | 2.431201092 | 13.04866814 |
| 2.91700526  | 3.280477317 | 1.361040821 | 4.376312415 | 10.35362454 |
| 0.21695858  | 4.111072668 | 0.321478559 | 5.495452321 | 14.99329638 |
| 0.062693294 | 2.420315252 | 0.083648179 | 1.327412041 | 10.6338094  |
| 0.016547501 | 7.49424057  | 1.084628652 | 3.296867162 | 8.838164499 |
| 0.058425762 | 5.54943675  | 1.298887391 | 0.098136168 | 13.08180631 |
| 1.068615215 | 5.025268124 | 2.419417718 | 1.676010946 | 12.14996746 |
| 1.583967244 | 4.666380673 | 2.78302191  | 2.396756083 | 13.51889493 |
| 0.011121702 | 3.672490276 | 1.652574172 | 2.890805997 | 11.68561219 |
| 0           | 3.414984148 | 0.971310625 | 4.041895693 | 13.17473269 |
| 0.0503944   | 3.177490464 | 1.257792447 | 1.262094535 | 11.65637691 |
| 0           | 6.655655885 | 1.797463851 | 2.414486173 | 13.50727946 |
| 1.566193298 | 6.397966842 | 3.435014878 | 2.974078215 | 12.85037733 |
| 0.058466676 | 0.099370233 | 1.932614903 | 5.818723473 | 12.62492593 |
| 0.086345507 | 4.748322632 | 2.534159735 | 2.922833333 | 13.14257763 |
| 1.950941203 | 4.454962474 | 3.061694813 | 2.68415055  | 12.41884843 |
| 2.179294799 | 8.549815838 | 1.885788776 | 2.118254565 | 10.69414627 |
| 0.593422004 | 3.835174543 | 1.70636776  | 3.64737248  | 11.07912607 |
| 0.097527748 | 4.741108344 | 1.498980475 | 7.309329654 | 13.22143835 |
| 0           | 5.925886594 | 0.890645957 | 3.911146831 | 12.57869161 |
| 0.068667299 | 4.434535613 | 1.991463511 | 5.118588156 | 11.60323157 |
| 0.047035855 | 3.81914123  | 2.298211624 | 6.802181076 | 8.409703031 |
| 0.012917849 | 4.563900773 | 0.016661254 | 1.066421874 | 12.35685069 |
| 1.035366247 | 4.645809866 | 3.0526219   | 2.375362758 | 13.9545688  |
| 0           | 11.97593242 | 2.166469737 | 1.90113227  | 11.8681246  |
| 2.225848018 | 3.459494216 | 1.896435801 | 2.468346264 | 9.971749042 |
| 0.967487581 | 2.755620277 | 1.543075379 | 1.542053415 | 16.26955607 |
| 1.090284797 | 2.950269329 | 1.0979909   | 0.030470677 | 14.97985395 |
| 0           | 3.427088798 | 0.979098396 | 1.97197843  | 11.60052734 |
| 0.070131343 | 3.989433859 | 1.358784598 | 2.470951878 | 12.53063339 |
| 0.059727654 | 6.984031377 | 0.079530278 | 1.957851607 | 11.74265365 |
| 2.366755842 | 3.227864432 | 3.223174489 | 2.863833415 | 14.49534207 |
| 1.070700255 | 3.487190373 | 1.690565551 | 2.295822092 | 10.74123075 |
| 0.647249624 | 5.830981386 | 0.630845702 | 2.020448128 | 12.3900433  |
| 2.123268021 | 5.497247407 | 2.138925955 | 1.719743673 | 12.82417188 |
| 0.980804237 | 10.45350849 | 0           | 4.361140221 | 11.84161433 |
| 1.235381042 | 3.55054581  | 1.886904108 | 2.677687634 | 11.69433721 |
| 0.941819918 | 3.972184462 | 0.469359363 | 2.116992962 | 13.08269839 |
| 0.055118435 | 2.981590702 | 1.913191304 | 1.929128413 | 8.296506766 |
| 0.031752663 | 5.780510094 | 1.162412934 | 2.21510516  | 13.50798033 |
| 0.003275958 | 5.934132328 | 0.004197715 | 1.605516713 | 11.54136651 |
| 0           | 4.697741429 | 0.902418493 | 1.86835104  | 11.04287138 |
| 0           | 4.342929462 | 0.674734133 | 2.091523299 | 10.43318862 |
| 0           | 5.891391813 | 2.228201057 | 0.753044468 | 11.707677   |
| 0           | 5.652894719 | 2.763255863 | 1.476147591 | 10.53414806 |
| 0.035103021 | 7.494874978 | 2.553385582 | 1.181678806 | 14.0437274  |
| 0.950919135 | 4.558558049 | 1.52170214  | 3.08943699  | 15.29026085 |
| 1.975479961 | 4.053698517 | 0           | 4.489471329 | 13.86722736 |
| 1.469067916 | 7.091336797 | 0.895332279 | 1.858703152 | 11.7212116  |
| 0           | 8.164629015 | 1.896122352 | 1.209097465 | 12.22063131 |
| 0.0253855   | 3.899208107 | 1.738219388 | 3.19160143  | 8.485709798 |
| 2.079270065 | 4.918648174 | 2.309007706 | 3.490666361 | 10.37574845 |

| hsa-miR-518e-3p | hsa-miR-518a-5p | hsa-miR-527 | hsa-miR-5187-5p | hsa-miR-431-5p |
|-----------------|-----------------|-------------|-----------------|----------------|
| 0.109210457     | 0.104621245     | 0.10418388  | 1.976985763     | 4.675458997    |
| 0.070433431     | 0.067685845     | 0.067423044 | 2.878548213     | 1.856757637    |
| 0.033760128     | 0.032539904     | 0.032422798 | 2.732600095     | 3.334045075    |
| 1.058331381     | 1.058731094     | 1.058746808 | 3.666601243     | 2.402524454    |
| 0.1183182       | 0.113262868     | 0.112781493 | 1.363115129     | 2.024692432    |
| 0.049247067     | 0.047407383     | 0.047231078 | 1.772776237     | 1.159915523    |
| 0.159909212     | 0.152564079     | 0.15186741  | 2.57668368      | 0.162624928    |
| 0.020988355     | 0.020250784     | 0.020179917 | 1.667488908     | 3.426465297    |
| 0               | 0               | 0           | 1.49749771      | 2.699728328    |
| 1.151496174     | 0.044611328     | 0.044446428 | 2.189044333     | 2.197721369    |
| 0               | 0               | 0           | 2.658937017     | 0.588724796    |
| 0.225706246     | 0.214202671     | 0.213118442 | 1.643494167     | 3.463722778    |
| 0.108572508     | 0.104015468     | 0.103581143 | 1.335565369     | 0.110247158    |
| 0               | 0               | 0           | 1.563225507     | 5.140757621    |
| 0.190783793     | 0.181568743     | 0.18069729  | 0.152912141     | 2.258577389    |
| 1.136278289     | 0.040025998     | 0.039879531 | 2.764782296     | 0.042110171    |
| 1.385340614     | 0               | 0           | 2.621649401     | 5.832218111    |
| 3.175741052     | 2.182555641     | 2.182994016 | 1.746294012     | 4.357869119    |
| 2.327815785     | 1.255085082     | 1.255109668 | 0.065838337     | 2.327447217    |
| 0.245788972     | 0.23288642      | 0.231672695 | 0.193535882     | 1.718468102    |
| 0.175778062     | 0.167489866     | 0.166704939 | 1.518141627     | 3.731781376    |
| 0.292121618     | 0.275761934     | 0.274229923 | 1.798477811     | 1.836233567    |
| 1.696025418     | 0.026671315     | 0.026576595 | 1.090877882     | 2.1202485      |
| 3.624674945     | 2.568628471     | 2.567986219 | 2.093232028     | 2.572794547    |
| 2.115391088     | 0.138766685     | 0.138148425 | 1.437376687     | 1.446453305    |
| 0               | 0               | 0           | 1.888590411     | 4.794122502    |
| 0.979109093     | 0               | 0           | 3.429642253     | 1.559460493    |
| 0.06076951      | 0.058444701     | 0.05822214  | 0.050872317     | 2.255758622    |
| 1.268764625     | 0.080724994     | 0.080403076 | 1.894380747     | 3.184752727    |
| 0.039025369     | 0.037598741     | 0.037461893 | 0.032915797     | 2.991292553    |
| 0.499137679     | 0               | 0           | 0.493397936     | 4.555962268    |
| 0               | 0               | 0           | 2.321530932     | 1.999603778    |
| 1.004002244     | 1.000670975     | 1.000510418 | 0.540362738     | 3.437032679    |
| 0.761389476     | 0               | 0           | 3.22037569      | 1.287995596    |
| 0.095467127     | 0.091557149     | 0.091184037 | 2.368211026     | 0.096901786    |
| 0.277432212     | 0.262203154     | 0.260774976 | 1.765268948     | 1.799358933    |
| 0.125882737     | 0.120430597     | 0.119911806 | 2.029699615     | 7.075768258    |
| 0               | 0               | 0           | 2.06719546      | 8.875441818    |
| 0.082404397     | 0.079113043     | 0.078798582 | 2.322470016     | 1.262300551    |
| 0.021168385     | 0.020424189     | 0.020352686 | 0.017965802     | 3.274433926    |
| 0.099048827     | 0.094964631     | 0.094575025 | 3.578027093     | 1.958542915    |
| 0.064854388     | 0.062352641     | 0.062113232 | 1.828300344     | 3.301026713    |
| 0.125435942     | 0.120007482     | 0.119490923 | 2.468516423     | 2.840370794    |
| 1.813537986     | 2.246068894     | 2.24588788  | 2.564788631     | 3.077029249    |
| 0               | 0               | 0           | 1.507444913     | 8.761559954    |
| 0.924842191     | 0.924278992     | 0.92425166  | 1.90214879      | 3.688674972    |
| 0.161284972     | 0.153859592     | 0.153155405 | 1.480182416     | 3.246699863    |
| 0.190759865     | 0.18154632      | 0.180675007 | 1.556616746     | 3.783933685    |
| 0.112615133     | 0.107853165     | 0.107399481 | 0.092626688     | 3.497257625    |
| 0               | 0               | 0           | 3.797533334     | 8.527445956    |
| 0.002601651     | 0.002513987     | 0.00250555  | 2.333557774     | 3.472797474    |
| 0.658910902     | 0               | 0           | 2.922499452     | 2.616042483    |
| 0.053030481     | 0.051033782     | 0.050842496 | 2.543677507     | 3.958624697    |
| 0.020783734     | 0.020053688     | 0.019983543 | 1.068662802     | 4.692881176    |
| 0.013962096     | 0.013479151     | 0.013432719 | 1.640292422     | 1.641545806    |
| 8.138597932     | 6.941043263     | 6.867816698 | 1.304085253     | 8.262860049    |

|             |             |             |             |             |
|-------------|-------------|-------------|-------------|-------------|
| 0           | 0           | 0           | 1.074721555 | 3.929451707 |
| 0           | 0.864309419 | 0.864255676 | 0.865059003 | 2.794220221 |
| 1.591971124 | 0           | 0           | 2.36757804  | 2.138916406 |
| 0           | 0           | 0           | 3.179317469 | 8.968219659 |
| 1.113707578 | 0.033267993 | 0.033148072 | 1.112809804 | 2.149037347 |
| 0           | 0           | 0           | 2.094118516 | 2.558058636 |
| 0           | 0           | 0           | 1.191466574 | 1.859934704 |
| 0.008931954 | 0.008626534 | 0.008597157 | 1.620559294 | 3.214711147 |
| 0           | 0           | 0           | 2.287448199 | 4.12923147  |
| 0.064984705 | 0.062477272 | 0.062237321 | 3.083375852 | 0.065901489 |
| 0.060283769 | 0.057979828 | 0.057759255 | 3.064993117 | 0.061125695 |
| 0           | 0           | 0           | 1.567687686 | 3.678055653 |
| 3.433089161 | 2.297971446 | 2.297987844 | 1.977865366 | 1.977111841 |
| 0           | 0           | 0           | 3.391212921 | 2.132878045 |
| 0           | 0           | 0           | 3.222372043 | 4.887661447 |
| 0.055565184 | 0.053462048 | 0.053260611 | 0.04659898  | 2.837257275 |
| 0.198747141 | 0.189026404 | 0.18810783  | 0.158882515 | 1.594220218 |
| 5.654358815 | 3.331791891 | 3.179702281 | 0.001672391 | 2.816999821 |
| 0.355954497 | 0.334311231 | 0.33229711  | 3.4244675   | 0.36415201  |
| 0.009197247 | 0.008882564 | 0.008852296 | 0.00783862  | 2.040761788 |
| 0.316698296 | 0.298375495 | 0.296663773 | 0.243867489 | 1.897024919 |
| 0.014380426 | 0.013882538 | 0.013834672 | 1.04775063  | 1.047742108 |
| 0           | 0           | 0           | 1.374040666 | 0.828667244 |
| 1.28692951  | 0.086442209 | 0.086093506 | 0.074669507 | 1.92716554  |
| 0           | 0           | 0           | 3.355227332 | 2.22045925  |
| 0           | 0           | 0           | 3.246203487 | 3.766760247 |
| 1.769153814 | 0.044912213 | 0.044746092 | 2.190252822 | 4.137341455 |
| 0           | 0           | 0           | 2.297520029 | 3.142338806 |
| 0           | 0           | 0           | 2.620548953 | 4.245870346 |
| 0.068031278 | 0.065390134 | 0.065137459 | 1.216683091 | 2.284372476 |
| 1.674378446 | 0.216156077 | 0.21505857  | 2.32060002  | 3.470459337 |
| 0.14820556  | 0.141531447 | 0.14089772  | 0.120459931 | 2.123838131 |
| 0.680847666 | 0           | 0           | 3.579857103 | 2.098568048 |
| 0           | 0           | 0           | 1.267639865 | 2.412871571 |
| 0.509104086 | 2.341005361 | 2.341435038 | 2.763984504 | 0           |
| 0.030680087 | 0.029578595 | 0.029472855 | 2.127583542 | 2.728137734 |
| 0           | 0           | 0           | 0.967278978 | 1.956279516 |
| 1.004879459 | 0.001400975 | 0.001396286 | 3.707386795 | 4.865750278 |
| 0.067643333 | 0.065019296 | 0.064768248 | 2.599705578 | 1.217207112 |
| 0           | 0           | 0           | 0.884757199 | 0.885516438 |
| 0           | 0           | 0           | 2.489407082 | 4.491676438 |
| 0           | 0           | 0           | 1.955888277 | 0.966026255 |
| 0.069001923 | 0.066317877 | 0.06606112  | 1.842760442 | 4.504129416 |
| 0.368132031 | 0.345412735 | 0.343301023 | 1.961569403 | 2.756456788 |
| 0           | 0           | 0           | 0.85556354  | 0.8566592   |
| 0           | 0           | 0           | 2.469334003 | 1.482792528 |
| 0           | 0           | 0           | 2.969188537 | 3.586913802 |
| 0           | 0           | 0           | 2.887189854 | 3.704416954 |
| 0.025724558 | 1.085789288 | 1.085810424 | 2.433358056 | 1.084778795 |
| 0.004691791 | 0.004532926 | 0.00451764  | 1.015700572 | 2.607534493 |
| 1.696698492 | 0.02683673  | 0.026741387 | 3.296195269 | 5.570938834 |
| 2.027977011 | 0           | 0           | 2.037591856 | 3.833485167 |
| 7.541819253 | 6.946590242 | 6.917246487 | 0.636755963 | 5.003046513 |
| 0.110547603 | 0.105890755 | 0.105447    | 2.419461911 | 0.112259328 |
| 0           | 0           | 0           | 1.071646192 | 4.553271025 |
| 0           | 0           | 0           | 0.788015241 | 3.653152952 |
| 0           | 0           | 0           | 1.17117412  | 2.472980818 |
| 2.675116634 | 0.910585638 | 0.910552613 | 1.477568897 | 3.560490242 |

|             |             |             |             |             |
|-------------|-------------|-------------|-------------|-------------|
| 0.061184965 | 0.058842279 | 0.058618016 | 3.263330546 | 4.886576196 |
| 0           | 0           | 0           | 2.697822494 | 5.933580855 |
| 2.465803358 | 2.801630156 | 2.801028983 | 0.095495045 | 0.118064164 |
| 0           | 0           | 0           | 1.750615972 | 4.132758465 |
| 7.770874082 | 6.012136203 | 6.011218509 | 2.30638142  | 3.35647948  |
| 0.036002782 | 0.034695172 | 0.034569706 | 2.475787993 | 4.180759545 |
| 1.079333454 | 1.079867536 | 1.079887589 | 2.100309823 | 1.078923897 |
| 0           | 0.540871333 | 0.540637669 | 1.885033249 | 1.634260162 |
| 2.218305275 | 0.422005896 | 0.419167222 | 0.334590214 | 0.464615769 |
| 0.104217312 | 0.099878235 | 0.099464515 | 0.085962326 | 3.793868997 |
| 0.025860246 | 1.08623405  | 1.086255265 | 2.108183494 | 1.085218556 |
| 0.096559207 | 0.092596318 | 0.092218196 | 2.371977362 | 3.005383287 |
| 0.022653424 | 0.021854378 | 0.021777616 | 2.685553476 | 3.698970033 |
| 0.23688976  | 0.224614583 | 0.223458879 | 2.34425676  | 1.695342623 |
| 5.516705933 | 4.611455565 | 4.611286105 | 1.653103057 | 2.401365465 |
| 0.971126716 | 0.970916062 | 0.97090644  | 2.767193628 | 2.281520966 |
| 0.082383243 | 0.079092869 | 0.078778501 | 2.654277389 | 1.262236466 |
| 3.286293807 | 2.233607414 | 2.233897936 | 3.004949661 | 3.948650529 |
| 0           | 0           | 0           | 0           | 1.563779347 |
| 0.09663221  | 0.092665778 | 0.092287321 | 2.372228822 | 0.098087782 |
| 0.148308434 | 0.141628514 | 0.140994241 | 1.445556987 | 2.578420924 |
| 0           | 0           | 0           | 3.328849905 | 7.174274894 |
| 0           | 0           | 0           | 1.882688709 | 3.293537947 |
| 0           | 0           | 0           | 2.154185778 | 2.313270412 |
| 0.170170439 | 0.16221986  | 0.161466503 | 1.503542208 | 0.173113622 |
| 0.890347993 | 0           | 0           | 0.890210829 | 4.214516833 |
| 0.115087186 | 0.110198669 | 0.109733036 | 1.354023909 | 2.013727568 |
| 0.07654506  | 0.07352263  | 0.073233705 | 3.912690352 | 1.244491651 |
| 0.020092307 | 0.019387639 | 0.019319928 | 2.084662211 | 2.088037005 |
| 0.011536229 | 0.011139395 | 0.011101234 | 3.053264263 | 4.704588739 |
| 1.600840426 | 0.709602484 | 0.709466917 | 3.634355648 | 3.425255985 |
| 0           | 0           | 0           | 2.473779023 | 2.208919865 |
| 0           | 0           | 0           | 3.649861022 | 2.534225328 |
| 2.458371452 | 0.028968158 | 0.028864743 | 3.722368817 | 2.458286652 |
| 0           | 0           | 0           | 2.556173059 | 1.971970644 |
| 0.117778024 | 0.112750693 | 0.112271959 | 1.361598123 | 0.119627502 |
| 6.597378097 | 5.777101262 | 5.701838826 | 1.307798667 | 1.311775436 |
| 0.011599903 | 0.011200821 | 0.011162444 | 0.00987801  | 1.632075004 |
| 0           | 0           | 0           | 2.760581462 | 6.252960164 |
| 6.683775333 | 6.36727176  | 6.323026788 | 2.431727997 | 3.079685447 |
| 5.981183775 | 4.415762224 | 4.254490528 | 2.140302846 | 2.146340967 |
| 4.930481804 | 4.672103246 | 4.581048995 | 1.811592825 | 5.439793019 |
| 0.08274572  | 0.079438537 | 0.079122573 | 2.655595901 | 3.845141882 |
| 0           | 0           | 0           | 0.907042301 | 3.554002093 |
| 0.090684464 | 0.087004038 | 0.086652675 | 0.075143358 | 3.211582248 |
| 3.238325466 | 1.784295706 | 1.784226031 | 2.534272311 | 2.21515501  |
| 8.206901908 | 7.383905841 | 7.264697986 | 0.004294929 | 0.005093889 |
| 0.90210233  | 0           | 0           | 3.316735202 | 2.442000378 |
| 2.926064977 | 2.796344187 | 2.649922536 | 0.673909598 | 2.301151341 |
| 0           | 0           | 0           | 1.971823621 | 3.974752827 |
| 0.87607654  | 0           | 0           | 2.755497353 | 0.453452973 |
| 4.36206302  | 4.592671139 | 4.356623882 | 2.226717208 | 2.570130028 |
| 0           | 0           | 0           | 1.931420258 | 5.844405088 |
| 0           | 0           | 0           | 2.293296498 | 1.558836771 |
| 7.843658344 | 7.030345158 | 6.970593315 | 0.894912229 | 2.84054112  |
| 0.699677176 | 0           | 0           | 1.590772703 | 3.403079957 |
| 8.265487726 | 7.485042811 | 7.465926416 | 1.739520606 | 4.106790943 |
| 5.47906977  | 4.141387347 | 4.14187331  | 2.306530909 | 3.588941096 |



| hsa-miR-518a-3p | hsa-miR-508-3p | hsa-miR-1295a | hsa-miR-523-3p | hsa-miR-18a-3p |
|-----------------|----------------|---------------|----------------|----------------|
| 0.107283606     | 2.437289698    | 0.105594355   | 0.105972545    | 3.274566122    |
| 0.069282024     | 4.989234283    | 2.626959569   | 0.06849676     | 4.416170319    |
| 0.033249693     | 6.263655701    | 0.032799945   | 0.032900818    | 2.473133458    |
| 0.017259685     | 5.046512857    | 2.40234104    | 0.017085043    | 3.787404177    |
| 0.116194679     | 4.237519985    | 0.114334156   | 0.114750597    | 2.023366268    |
| 0.048476926     | 8.570787617    | 1.16163685    | 0.047951025    | 0.04659607     |
| 0.156817404     | 4.008708764    | 0.154116198   | 0.15472019     | 0.149368512    |
| 1.669897998     | 1.068611263    | 3.27253556    | 1.669918693    | 0.019924407    |
| 0               | 4.46773778     | 2.700228177   | 0              | 1.902891842    |
| 0.045611512     | 2.527528441    | 0.044977619   | 0.045119751    | 7.058775576    |
| 0               | 3.661977767    | 1.414123545   | 0              | 2.635354265    |
| 0.220847806     | 2.358106764    | 2.361644489   | 0.217565714    | 0.209239022    |
| 0.106659226     | 1.988025743    | 4.88574665    | 1.343611282    | 2.770623179    |
| 0               | 3.672266748    | 2.780812868   | 0              | 5.586472074    |
| 0.186898812     | 3.582439243    | 0.183511863   | 0.184268606    | 4.777608803    |
| 0.040914147     | 4.013557302    | 0.040351307   | 0.040477522    | 4.107551105    |
| 0.564876457     | 0.572593235    | 0.563698001   | 0.563936149    | 1.907601949    |
| 1.536938705     | 3.713909488    | 2.306718392   | 2.306382544    | 1.31804328     |
| 1.889319523     | 3.16354711     | 2.661609328   | 1.254905823    | 2.3249362      |
| 0.240334078     | 3.526776843    | 2.419507265   | 0.236653705    | 1.719944055    |
| 0.17228649      | 5.161287029    | 1.53575779    | 0.16992043     | 2.207499694    |
| 0.285188598     | 0.306314295    | 4.083264563   | 2.548878388    | 1.835623761    |
| 0.027245227     | 5.429878354    | 0.026881615   | 0.026963181    | 1.092180957    |
| 2.914408097     | 3.426139263    | 1.454257735   | 4.637025254    | 2.565437813    |
| 0.142538092     | 4.224468791    | 4.210033223   | 1.450237326    | 2.901362739    |
| 0               | 2.963067032    | 1.202039059   | 0              | 0.693752472    |
| 0               | 4.666950454    | 2.292759965   | 0              | 5.325045449    |
| 0.059795734     | 4.102094629    | 0.058939261   | 0.059131234    | 2.254153851    |
| 0.082681768     | 4.796184693    | 4.296933802   | 0.081718776    | 0.079245101    |
| 0.03842844      | 1.738259471    | 3.648258841   | 0.038020575    | 3.772482182    |
| 0.497140086     | 2.592286297    | 0.495787998   | 0              | 2.927455562    |
| 0               | 8.266299076    | 2.999559328   | 0              | 2.999562833    |
| 1.002185398     | 2.25365505     | 1.632528159   | 0              | 2.074235286    |
| 0               | 3.772338374    | 0.759765522   | 0              | 2.630520189    |
| 0.093826583     | 4.977522531    | 1.304546595   | 0.092709402    | 0.089842482    |
| 0.270983233     | 5.279730488    | 0.265395025   | 1.80312945     | 0.255674874    |
| 0.123591669     | 2.839875402    | 0.121585381   | 0.122034366    | 0.118048565    |
| 0               | 5.047780787    | 1.356044782   | 0.815345391    | 5.126991738    |
| 0.081024305     | 8.988234837    | 1.900796487   | 0.080083751    | 1.89969473     |
| 0.020857268     | 5.281303596    | 1.670629323   | 0.020644467    | 3.425130154    |
| 0.09733488      | 3.617437205    | 3.905547233   | 0.096167966    | 1.957906592    |
| 0.06380629      | 3.628369376    | 4.396518362   | 0.063091246    | 2.270110495    |
| 0.123154876     | 4.897317274    | 2.049230384   | 0.121604329    | 2.047047467    |
| 0.057543337     | 5.246584436    | 1.190812411   | 2.246540911    | 3.858961702    |
| 0               | 1.914520835    | 1.505695647   | 0              | 4.543219546    |
| 2.88685533      | 2.696065071    | 2.696155669   | 0.924388496    | 2.216491114    |
| 0.158159168     | 3.680187861    | 2.962239037   | 0.156039074    | 3.231139702    |
| 0.186875523     | 1.565876304    | 1.576777738   | 0.184245746    | 0.177553297    |
| 0.11061541      | 4.770524693    | 3.490492937   | 0.109255045    | 2.004200849    |
| 0               | 4.420661182    | 2.961345868   | 0              | 4.991662788    |
| 1.008784869     | 3.183052237    | 1.595679726   | 0.002539963    | 2.819996245    |
| 0.657495459     | 2.617976642    | 0.656572879   | 0              | 3.672230861    |
| 0.052194454     | 6.88536187     | 3.051256699   | 0.051623692    | 1.792872879    |
| 0.020478538     | 3.913212537    | 4.427358592   | 0.020269783    | 3.270614623    |
| 0.013760266     | 3.530051026    | 1.04689112    | 0.01362216     | 2.650647037    |
| 7.497091121     | 2.646660765    | 1.299923779   | 7.956704473    | 1.99353985     |

|             |             |             |             |             |
|-------------|-------------|-------------|-------------|-------------|
| 0           | 2.348103473 | 2.165288467 | 0           | 2.167368954 |
| 0           | 2.13147052  | 2.387388443 | 0           | 1.417832923 |
| 0           | 0           | 0.70378177  | 0           | 4.207026867 |
| 0           | 4.84520779  | 0           | 0           | 3.766804311 |
| 0.033994882 | 5.177995891 | 0.033534294 | 0.033637596 | 1.722636231 |
| 0           | 6.59010502  | 1.379719231 | 0           | 2.342768371 |
| 0           | 3.17643082  | 0           | 0           | 1.561585092 |
| 0.008804345 | 5.135200323 | 5.046483819 | 1.030086652 | 2.627253183 |
| 0           | 1.553795657 | 2.547955015 | 0           | 3.420607558 |
| 0.063934218 | 2.270640384 | 2.87498639  | 0.063217549 | 4.211264879 |
| 0.059318757 | 3.453774508 | 6.922821275 | 0.058660218 | 3.740173602 |
| 1.980749349 | 3.437310572 | 1.567254739 | 0.985488348 | 0.985453356 |
| 3.433195688 | 4.779759747 | 1.977068078 | 2.974488365 | 0.982664926 |
| 0           | 2.867073741 | 4.458786067 | 0           | 3.659012071 |
| 0           | 1.500924776 | 0           | 0           | 3.065971252 |
| 0.054684483 | 1.177691641 | 0.053909604 | 0.05408331  | 2.233635473 |
| 0.194647308 | 7.114806305 | 0.191075026 | 0.191873018 | 1.59702797  |
| 4.595275318 | 1.592913043 | 3.469384159 | 3.594976115 | 3.59486327  |
| 0.346751873 | 1.980687893 | 0.338822187 | 0.340586488 | 0.325125931 |
| 0.009065766 | 2.628780841 | 2.040814684 | 0.008975773 | 4.13411157  |
| 0.308923435 | 5.627924184 | 6.355649738 | 0.303701404 | 1.894997747 |
| 0.014172347 | 3.070639716 | 0.013988777 | 0.014029968 | 3.069638111 |
| 0           | 2.076847515 | 2.075134834 | 0           | 3.428570299 |
| 0.088562522 | 2.704841671 | 3.401989149 | 0.08751889  | 1.926789048 |
| 0           | 3.060173754 | 4.34537215  | 0           | 3.696198744 |
| 0           | 4.618938685 | 0           | 0           | 1.804452337 |
| 1.153059324 | 5.366547979 | 2.198928232 | 2.199014738 | 0.044147709 |
| 0           | 3.431416732 | 0.981627865 | 0.981635795 | 3.972063957 |
| 0.868659443 | 5.104293431 | 1.42263937  | 0           | 2.612742796 |
| 0.066924607 | 0.070240526 | 0.065951717 | 0.066169746 | 3.112019772 |
| 1.675692569 | 6.693952643 | 0.218605658 | 1.675746434 | 2.361782524 |
| 0.145397862 | 4.832217158 | 4.338024014 | 0.143491992 | 2.570574562 |
| 0           | 3.626213227 | 7.918498802 | 0           | 2.659148892 |
| 0           | 3.891226616 | 0           | 0.74244274  | 2.767217966 |
| 0.507138888 | 3.688455116 | 1.804858533 | 0           | 3.218475071 |
| 0.030219388 | 6.746153294 | 1.101907464 | 0.02990445  | 2.459831531 |
| 0           | 2.276293096 | 0           | 0           | 2.276292153 |
| 0.001429344 | 4.708216658 | 1.004909952 | 1.00490789  | 1.004919208 |
| 0.066543851 | 5.505415797 | 2.615732199 | 0.065793876 | 3.110418639 |
| 0.884450088 | 2.635687638 | 4.768599242 | 0.884219386 | 3.521487303 |
| 0           | 4.915336471 | 0.781098753 | 0           | 2.261889305 |
| 0           | 6.133888369 | 0           | 0           | 2.757582323 |
| 0.067877223 | 2.892774014 | 2.891562675 | 0.067110107 | 1.223827801 |
| 0.358465729 | 4.126608823 | 3.218740469 | 0.351994807 | 3.551878587 |
| 0.855323518 | 2.117825371 | 4.22686894  | 0           | 2.781927547 |
| 0           | 6.071399078 | 1.887917481 | 0           | 1.482172826 |
| 0           | 5.856269869 | 2.125959697 | 0           | 1.414128267 |
| 0           | 2.651956839 | 1.835881039 | 0           | 3.250162738 |
| 0.025342546 | 2.930112294 | 6.65489729  | 0.025081325 | 2.438231058 |
| 0.004625428 | 2.830317061 | 0.004566846 | 0.004579994 | 2.343685616 |
| 1.696877029 | 4.844463515 | 1.696889199 | 0.027130519 | 4.459896289 |
| 2.496802951 | 5.296557384 | 2.685176566 | 0.794871936 | 2.282946378 |
| 7.292752609 | 3.895077553 | 3.20008801  | 6.107382502 | 3.778577541 |
| 0.108592224 | 4.315060601 | 0.106878118 | 0.10726186  | 1.997210134 |
| 0           | 4.739994137 | 1.731146102 | 0           | 2.73218521  |
| 0           | 4.550789849 | 2.486042635 | 0           | 2.990926615 |
| 0           | 3.682101025 | 2.916872474 | 0           | 2.476595976 |
| 1.47536364  | 3.765747464 | 4.181149556 | 1.47528587  | 4.182731962 |

|             |             |             |             |             |
|-------------|-------------|-------------|-------------|-------------|
| 0.060203682 | 3.878958913 | 0.059340628 | 0.059534074 | 2.856916784 |
| 0           | 3.232517177 | 3.236485929 | 0           | 2.807202057 |
| 1.365863023 | 2.014016475 | 2.463849047 | 1.366252947 | 2.016416274 |
| 0           | 1.242668139 | 0.897980987 | 0           | 0.896566768 |
| 6.461605898 | 4.963217486 | 2.92777281  | 7.458926275 | 4.447620518 |
| 0.035455733 | 3.344237492 | 1.119174674 | 0.035081883 | 3.340889468 |
| 1.079640008 | 5.295316792 | 0.023254573 | 0.023324547 | 0.022699867 |
| 0           | 7.207082562 | 0.541452945 | 0           | 4.73745871  |
| 0.43964252  | 8.013572564 | 0.42838031  | 0.430879778 | 2.202142209 |
| 0.102395937 | 2.419080187 | 4.053474836 | 0.101156268 | 1.330699151 |
| 1.689144819 | 4.941802123 | 4.522724767 | 0.025213424 | 2.704825308 |
| 0.094896372 | 2.390865865 | 0.093437337 | 0.093764087 | 2.725850548 |
| 0.022319352 | 1.073973764 | 2.691120022 | 0.022090871 | 3.27939874  |
| 0.231702472 | 3.938789017 | 0.227194687 | 0.22820069  | 1.697131264 |
| 4.410487069 | 4.337541146 | 2.075913404 | 4.410043735 | 4.731070076 |
| 0.971010412 | 5.123171565 | 6.976543229 | 1.961415582 | 3.656498281 |
| 0.081003564 | 1.897099195 | 0.079791828 | 0.080063289 | 2.337158359 |
| 3.191189991 | 3.461679332 | 2.415423271 | 2.024378908 | 2.980962574 |
| 0           | 5.615663537 | 2.297706657 | 0           | 2.974462833 |
| 0.094967883 | 8.664145542 | 0.093507545 | 0.093834586 | 2.390041093 |
| 0.145498278 | 4.65980579  | 2.124312355 | 0.143590752 | 2.121425802 |
| 0           | 4.808418217 | 2.686789195 | 0           | 4.320557455 |
| 0           | 2.120663291 | 0.690823414 | 0           | 4.007933683 |
| 0           | 4.001757122 | 0.576691747 | 0           | 5.161338899 |
| 0.166822045 | 10.51173798 | 0.163898734 | 0.164552222 | 2.190203277 |
| 0           | 5.545589839 | 3.733817724 | 0           | 0.889359953 |
| 0.113034067 | 6.611001289 | 0.111234833 | 0.111637588 | 2.456517617 |
| 0.075278096 | 8.550578129 | 2.651334771 | 0.074414337 | 4.260262192 |
| 0.01979773  | 1.065720676 | 2.679411088 | 0.01959623  | 3.420027201 |
| 0.011370405 | 3.380018635 | 0.011224086 | 0.011256921 | 1.632004376 |
| 0           | 2.151071713 | 1.900026011 | 0           | 2.362777226 |
| 0           | 3.334919169 | 4.572829419 | 0           | 2.209433422 |
| 0           | 3.530529552 | 0           | 0           | 2.27300377  |
| 1.099636983 | 2.457568417 | 1.70555296  | 1.09980387  | 0.028492005 |
| 0           | 2.292679111 | 5.873603483 | 0           | 0           |
| 0.115666322 | 3.848353408 | 2.023525226 | 0.11423023  | 0.110552061 |
| 5.783898263 | 4.46256207  | 4.257177214 | 6.43671044  | 0.093023053 |
| 0.011433139 | 3.867149217 | 1.632333997 | 0.011319012 | 1.03908615  |
| 0           | 3.247913935 | 0           | 0           | 2.855604289 |
| 5.873293004 | 3.536397092 | 1.118723159 | 4.815972951 | 3.087758713 |
| 5.125547089 | 3.334332246 | 3.332802621 | 6.800645825 | 3.622628648 |
| 4.507708982 | 5.45309975  | 3.355555863 | 3.426716613 | 5.318880742 |
| 0.081358968 | 3.973099186 | 1.265993738 | 0.080413893 | 1.900904684 |
| 0           | 3.492425196 | 3.734722143 | 0           | 1.943325054 |
| 0.0891406   | 2.707135277 | 0.087785419 | 0.088088955 | 3.727198879 |
| 3.237395343 | 3.83123175  | 2.814565901 | 2.546006734 | 2.213969767 |
| 7.945587768 | 3.347479969 | 3.726146393 | 9.193933538 | 2.345253323 |
| 0           | 3.170453372 | 3.752827117 | 0           | 3.172652712 |
| 1.176152657 | 1.849076416 | 3.267729055 | 1.844706845 | 2.303625763 |
| 0           | 2.92457607  | 3.060358463 | 0           | 1.96198261  |
| 1.472154362 | 3.236755304 | 2.719137564 | 0           | 3.009577107 |
| 3.853934946 | 2.568895507 | 2.838323091 | 3.852714506 | 1.183871928 |
| 0           | 4.374479404 | 2.247671915 | 0           | 1.929294361 |
| 0           | 6.623179056 | 0           | 0           | 5.096018651 |
| 6.936978474 | 3.295422673 | 0.894335592 | 7.058352426 | 2.173866337 |
| 0.698426226 | 1.884892256 | 3.407516831 | 1.20593495  | 2.527576119 |
| 8.252449561 | 4.524670369 | 6.486149729 | 7.523110013 | 2.171514702 |
| 5.556609297 | 4.992066318 | 2.041458067 | 4.003379128 | 3.856013443 |

| hsa-miR-517c-3p | hsa-miR-1283 | hsa-miR-942-3p | hsa-miR-3189-3p | hsa-miR-514a-3p |
|-----------------|--------------|----------------|-----------------|-----------------|
| 0.101247021     | 0.099269995  | 1.324568413    | 1.316710564     | 1.339927332     |
| 0.065654089     | 0.064459067  | 1.835956946    | 0.048854737     | 4.145247438     |
| 0.031632748     | 1.111931256  | 1.107132856    | 1.105010495     | 4.258247392     |
| 0.01644913      | 0.016180057  | 1.651440179    | 0.012569524     | 4.615075907     |
| 0.109550952     | 0.107378027  | 0.085497567    | 0.079677348     | 3.519728377     |
| 0.046042773     | 0.04523847   | 2.190485116    | 0.034621782     | 7.728096491     |
| 0.147204236     | 0.144079553  | 0.11312811     | 1.443679028     | 2.159007649     |
| 1.0702651       | 0.019376753  | 1.067378276    | 0.015027885     | 1.068910579     |
| 0               | 0            | 2.48938351     | 0               | 3.586556907     |
| 0.043334799     | 0.042582196  | 1.145381421    | 3.184697609     | 3.023691616     |
| 0               | 0            | 2.686625135    | 0               | 2.630857898     |
| 0.205891171     | 0.201077269  | 2.714416381    | 1.593224068     | 0.2338116       |
| 0.100664582     | 0.098701105  | 0.078852448    | 0.073549281     | 3.481485386     |
| 0               | 0            | 2.298796529    | 3.883238775     | 1.975938388     |
| 0.174875523     | 0.17098545   | 0.132911041    | 3.797717356     | 0.197242539     |
| 0.038891862     | 0.038222895  | 1.130944681    | 1.128287851     | 3.197921245     |
| 0               | 0            | 2.906842307    | 0               | 0               |
| 1.53758254      | 1.061301945  | 0              | 0               | 3.757620779     |
| 2.323824488     | 1.886139892  | 0.058374046    | 0.054597251     | 2.326324123     |
| 0.223592478     | 0.218220265  | 1.656082657    | 0.153757827     | 2.890456513     |
| 0.161456246     | 0.157944301  | 0.12337111     | 0.1144056       | 4.934526523     |
| 0.264060572     | 0.257327723  | 1.754109228    | 1.7294322       | 0.303766554     |
| 1.6958127       | 1.092089163  | 0.02097411     | 0.019717096     | 5.636449557     |
| 1.453139889     | 2.111550414  | 1.422663555    | 0.097107135     | 3.627337273     |
| 0.134006262     | 0.131226993  | 0.103538502    | 1.408162067     | 2.911125458     |
| 0               | 0            | 2.371503787    | 0               | 2.519984331     |
| 1.559363233     | 0.978937941  | 1.974211302    | 1.974878986     | 4.721378289     |
| 0.056723141     | 0.055709602  | 0.045263296    | 0.042409735     | 2.25484594      |
| 0.078238034     | 0.076777245  | 1.255308936    | 1.249486476     | 3.556197961     |
| 0.036538946     | 0.035913675  | 2.479448909    | 0.027616618     | 2.991080001     |
| 0               | 0            | 0.498613992    | 1.842521898     | 1.7919602       |
| 0               | 0            | 2.32154962     | 1.58462692      | 6.671940654     |
| 1.350673698     | 0            | 1.015074666    | 0               | 2.074922301     |
| 0               | 0            | 0              | 0.767427553     | 1.977595444     |
| 0.088676478     | 0.086986336  | 0.069810473    | 0.065193812     | 4.536632327     |
| 0.251286053     | 1.792978349  | 1.723713349    | 1.700451546     | 5.432832464     |
| 0.116431823     | 0.11409273   | 1.368965818    | 0.084384741     | 1.388205202     |
| 0               | 0            | 1.366388674    | 1.370598059     | 3.786734325     |
| 0.076683466     | 0.075256144  | 0.060674289    | 1.244850763     | 8.422274286     |
| 0.019869921     | 0.019542335  | 1.067945081    | 0.015155001     | 5.469047491     |
| 0.091957199     | 0.090193309  | 1.926816124    | 4.368807144     | 4.159155236     |
| 0.060501163     | 0.059411576  | 2.245839408    | 3.422201253     | 1.207157703     |
| 0.116025812     | 0.11369662   | 1.367791842    | 0.084107881     | 3.547239616     |
| 3.266371841     | 1.190628115  | 0.043608603    | 0.040868527     | 3.600471649     |
| 0               | 0            | 0              | 2.241239774     | 2.231766887     |
| 0               | 0.924167681  | 3.06794229     | 0.927771479     | 2.216334834     |
| 0.14844231      | 0.145284572  | 2.106510074    | 0.105864322     | 2.163394492     |
| 0.174854169     | 0.170964708  | 1.530835347    | 0.123087434     | 0.197217533     |
| 0.104353691     | 0.102303969  | 2.734456046    | 0.07610001      | 3.672288714     |
| 0               | 0            | 2.143515101    | 1.428062307     | 3.867768962     |
| 1.008822155     | 0.002409761  | 1.595024104    | 2.010444091     | 2.82014474      |
| 0               | 0            | 1.54482693     | 1.553515467     | 2.064308099     |
| 1.1737368       | 0.048681378  | 1.165415921    | 1.161944633     | 6.536385283     |
| 0.01950993      | 0.019188543  | 1.066733827    | 0.014883371     | 2.416948071     |
| 0.013119087     | 0.01290613   | 1.045110808    | 0.010043291     | 1.046052744     |
| 6.712642409     | 6.798793282  | 1.704972475    | 0               | 3.216394329     |

|             |             |             |             |             |
|-------------|-------------|-------------|-------------|-------------|
| 0           | 0           | 1.453964344 | 0           | 1.722742119 |
| 0           | 0.864035338 | 0.867906346 | 0.869900775 | 1.818742585 |
| 0           | 0           | 2.170128519 | 0.711990829 | 0           |
| 0           | 0           | 1.181612383 | 3.42367157  | 4.181352541 |
| 0.032339061 | 0.031790755 | 1.109462085 | 0.024498026 | 5.670672614 |
| 0           | 0           | 1.389307618 | 0           | 6.244250471 |
| 0           | 0           | 1.200925866 | 0           | 2.317283094 |
| 0.008398662 | 0.008263823 | 0.006843973 | 0.006446371 | 3.953290945 |
| 0           | 0           | 0           | 1.969000899 | 1.965822276 |
| 0.06062162  | 0.05952959  | 1.817992205 | 4.502529074 | 2.876642257 |
| 0.0562736   | 0.055269038 | 1.802313311 | 0.042083714 | 1.19309299  |
| 0           | 0           | 0           | 0           | 3.97733906  |
| 2.298124188 | 1.977279489 | 0           | 0           | 3.673730933 |
| 0           | 0           | 0           | 0.584006979 | 2.313566068 |
| 0           | 0.93021332  | 3.365042406 | 0           | 0           |
| 0.051903455 | 0.050985389 | 1.786404799 | 2.534152112 | 1.178493232 |
| 0.181974357 | 0.177878972 | 0.137917375 | 0.127656214 | 6.446351974 |
| 1.593009444 | 1.592988857 | 2.593461801 | 2.007864867 | 1.00650764  |
| 0.318981308 | 0.310215925 | 0.229474573 | 0.210006186 | 3.204958274 |
| 0.008647789 | 0.008508869 | 0.007046209 | 1.02930106  | 3.74781887  |
| 0.285319128 | 0.277824821 | 0.207825074 | 0.190691903 | 4.364282204 |
| 0.013511356 | 0.013291832 | 1.639756743 | 0.010341355 | 2.653206555 |
| 0           | 0           | 2.093144288 | 3.086962415 | 0.829759551 |
| 1.925935489 | 0.082168328 | 0.066067966 | 0.061729661 | 1.283509417 |
| 0           | 0           | 2.489945776 | 1.502728548 | 2.480510345 |
| 0           | 0           | 1.414342469 | 0           | 3.096142704 |
| 0.043626251 | 0.04286811  | 1.14632485  | 0.032847356 | 5.190607732 |
| 0           | 0           | 0           | 1.564345122 | 2.558724351 |
| 0           | 0           | 1.430677995 | 1.433820699 | 4.428936911 |
| 0.063436401 | 0.062286997 | 0.050475495 | 0.047260003 | 1.216889487 |
| 0.207743763 | 1.669148577 | 2.276098156 | 0.143937112 | 5.763368169 |
| 0.136652717 | 0.133805205 | 2.070593005 | 0.098032325 | 4.564263023 |
| 0           | 0           | 1.576482962 | 1.201476219 | 3.368686576 |
| 0           | 0           | 0.746939163 | 1.281458989 | 3.660070258 |
| 0           | 3.382393762 | 2.052800975 | 0           | 3.745259546 |
| 0.028759345 | 0.028275596 | 1.097629507 | 0.021828725 | 5.619132135 |
| 0           | 0           | 0           | 0           | 0.96761062  |
| 1.004919876 | 0.001343042 | 1.590577269 | 2.00582975  | 4.255618774 |
| 0.063078106 | 0.061936038 | 2.255503048 | 0.047002005 | 4.233518503 |
| 0           | 0           | 2.651607996 | 0           | 0.886259796 |
| 0           | 0           | 0.785535456 | 2.293321736 | 4.278439343 |
| 0           | 0           | 1.545386456 | 0           | 5.302104292 |
| 0.06433269  | 0.063164893 | 1.212239322 | 0.04790497  | 2.893391729 |
| 0.329350743 | 0.320177752 | 2.576977999 | 0.215845047 | 3.598921754 |
| 0           | 0           | 2.801427912 | 0           | 0.857581604 |
| 1.482271177 | 0           | 0.918620973 | 0.919929294 | 5.072908106 |
| 0           | 0           | 1.422460691 | 0.867023349 | 4.527876649 |
| 0           | 0           | 1.175116933 | 0.422230382 | 2.011477278 |
| 0.024131011 | 0.023729309 | 0.019528824 | 2.424581002 | 3.296179531 |
| 0.004414326 | 0.004344117 | 1.015288858 | 1.602636268 | 2.343769715 |
| 0.026097918 | 1.09265047  | 1.088787438 | 1.087061213 | 4.141471862 |
| 0           | 0.79400261  | 1.737164207 | 0           | 5.582842032 |
| 5.978368129 | 4.939828544 | 0           | 0.645795327 | 2.422154592 |
| 0.102467482 | 0.100461981 | 0.080204557 | 0.07479704  | 3.489290685 |
| 0           | 0           | 1.35431145  | 1.098722497 | 4.600756498 |
| 0           | 0           | 0.791961886 | 0           | 3.244492695 |
| 0           | 0           | 0.67219951  | 0           | 2.291391227 |
| 0.910434275 | 0.910442587 | 2.879799783 | 0           | 3.945315359 |

|             |             |             |             |             |
|-------------|-------------|-------------|-------------|-------------|
| 0.057107586 | 0.056086357 | 0.045562583 | 1.799399408 | 4.104027919 |
| 0           | 0           | 1.099583012 | 1.778165556 | 3.135636211 |
| 0.107661831 | 0.105533918 | 2.413857359 | 1.335001646 | 1.360397418 |
| 0           | 0           | 0.91066636  | 2.17748869  | 0.474762613 |
| 5.060383616 | 5.714224699 | 2.887648668 | 1.232418924 | 3.685053437 |
| 0.033723367 | 0.033149838 | 1.114019405 | 0.025527495 | 3.172591512 |
| 0.022444221 | 0.022072021 | 1.675035128 | 0.017094314 | 4.768073258 |
| 0           | 0.538999774 | 1.373712401 | 2.315802919 | 5.596057844 |
| 0.40051421  | 0.388341485 | 0.279852527 | 0.254594484 | 6.200751209 |
| 0.096685563 | 0.094813984 | 0.075861215 | 0.070787338 | 3.034857386 |
| 0.024257827 | 0.023853898 | 2.91675377  | 1.679702968 | 4.454931708 |
| 0.089677137 | 0.087964585 | 2.351903528 | 0.065895186 | 1.302720098 |
| 0.021259386 | 0.020907782 | 0.017226465 | 0.016202413 | 0.023199967 |
| 0.215760605 | 0.210638191 | 0.161372356 | 0.148922726 | 2.39373076  |
| 3.08287785  | 3.405434488 | 1.055592141 | 0.012387301 | 5.090975779 |
| 0           | 0           | 2.285014781 | 2.286044934 | 4.708489245 |
| 0.076664008 | 0.075237105 | 1.250480482 | 0.056717323 | 2.675485381 |
| 1.782682773 | 2.028816712 | 2.273506808 | 1.520771363 | 0.640122301 |
| 0           | 0.982500684 | 0.983115749 | 0.983408512 | 3.432773012 |
| 0.089744018 | 0.088029965 | 0.070619304 | 0.065942038 | 7.349677473 |
| 0.136745613 | 0.133895697 | 0.105537246 | 0.098094393 | 4.1073001   |
| 0           | 0           | 1.017395308 | 0.551616426 | 4.174242386 |
| 0           | 0           | 1.210708084 | 0           | 1.873325501 |
| 0           | 0           | 0.580581888 | 0.584741273 | 2.977949881 |
| 0.156427139 | 0.153053535 | 0.119769847 | 0.111117698 | 8.543108612 |
| 0           | 0           | 1.456125289 | 0.894291129 | 3.412128421 |
| 0.106607514 | 0.104504609 | 1.975340112 | 3.41551338  | 6.033439616 |
| 0.071289641 | 0.069977051 | 1.233904583 | 0.052890593 | 7.645811786 |
| 0.018862731 | 0.018552464 | 0.015300498 | 1.063330655 | 1.066007105 |
| 0.010843429 | 0.010668341 | 1.037356033 | 1.036668148 | 2.050802561 |
| 0           | 0.708671902 | 3.961867168 | 3.905273348 | 1.902533691 |
| 0           | 0           | 1.491335386 | 0           | 3.574284436 |
| 0.964570964 | 0           | 0           | 0           | 3.116715981 |
| 1.099964344 | 1.704728651 | 2.70991446  | 0.021385951 | 2.129819952 |
| 0           | 0           | 1.560633897 | 0           | 2.554705353 |
| 0.10905904  | 0.106897861 | 1.347535939 | 0.079339564 | 4.445377633 |
| 4.836366834 | 4.831362447 | 0.072181248 | 0.067386498 | 3.913119737 |
| 0.010903181 | 0.010727103 | 1.037560022 | 0.008357124 | 3.227864123 |
| 0           | 0           | 1.0485029   | 0           | 1.394886575 |
| 5.199325551 | 4.957233375 | 2.619905298 | 0           | 3.080108676 |
| 4.164572896 | 2.963597742 | 0.025598746 | 3.137692865 | 3.334536853 |
| 3.861275741 | 3.968557499 | 3.002812881 | 0.965128236 | 4.684105636 |
| 1.265901814 | 0.075563333 | 2.904400708 | 1.245787885 | 0.085027153 |
| 0           | 0.468364827 | 0.917964794 | 0.478078783 | 2.868184724 |
| 0.084290574 | 0.08269778  | 0.066479914 | 1.26742023  | 1.927563417 |
| 2.213326728 | 0.04649546  | 2.195471663 | 0.035561024 | 2.546156973 |
| 7.640567845 | 7.185451781 | 3.022169003 | 0.003641077 | 2.022312439 |
| 0           | 0           | 1.470183869 | 0           | 3.930321056 |
| 2.093565978 | 0.672726086 | 0.678849664 | 0           | 2.30242904  |
| 0           | 0           | 0           | 0           | 1.962954587 |
| 0           | 0.444289906 | 3.932342869 | 1.518205056 | 2.717065385 |
| 3.963827118 | 2.833450347 | 1.174871002 | 0.039348162 | 2.569506027 |
| 0           | 0           | 0.94840479  | 0.949264242 | 4.669397331 |
| 0           | 0           | 0           | 0           | 5.579975038 |
| 5.666511009 | 5.261682746 | 1.461727237 | 0.898843163 | 1.859246039 |
| 0           | 0           | 1.603370415 | 1.225521073 | 1.586100655 |
| 6.570921392 | 5.921559374 | 2.7494124   | 0.028382127 | 4.450230066 |
| 3.68891489  | 3.859929176 | 1.749247015 | 0.810705341 | 4.918646163 |

| hsa-miR-525-3p | hsa-miR-92a-1-5p | hsa-miR-548f-3p | hsa-miR-519a-3p | hsa-miR-3691-5p |
|----------------|------------------|-----------------|-----------------|-----------------|
| 0.1006695      | 4.671562194      | 0.090034809     | 0.107007987     | 1.952789372     |
| 0.065305354    | 6.298286352      | 1.223987312     | 0.069117064     | 0.050662753     |
| 0.031476627    | 2.741861622      | 0.028556384     | 0.033176456     | 1.106195608     |
| 0.016370715    | 4.177290617      | 1.058026223     | 0.017223035     | 0.012997268     |
| 0.108916056    | 3.318860675      | 0.097246754     | 0.115891041     | 0.082824988     |
| 0.045808187    | 2.809883657      | 0.041434405     | 0.048366494     | 1.152714388     |
| 0.14629027     | 3.239772365      | 0.129634038     | 0.156376079     | 0.109409306     |
| 0.019606808    | 2.908264157      | 0.017832044     | 0.020635746     | 1.066813537     |
| 0              | 5.092209502      | 0               | 0               | 0.929748367     |
| 0.043115309    | 6.788373117      | 0.039020489     | 0.045508255     | 2.994500341     |
| 0              | 3.366631748      | 0.582614107     | 0               | 1.738084118     |
| 0.204480727    | 3.694168506      | 0.179115142     | 0.220156243     | 0.149135621     |
| 0.100091029    | 4.076710226      | 0.089528009     | 0.10638554      | 1.319367322     |
| 0              | 5.328549986      | 1.976627148     | 0               | 1.977876463     |
| 0.173736776    | 4.253324763      | 0.153113501     | 0.18634499      | 2.949517207     |
| 0.038696787    | 5.938468303      | 0.035053847     | 0.040822475     | 1.129770185     |
| 0              | 2.84224675       | 0               | 0               | 1.705712461     |
| 0              | 3.240347072      | 0               | 1.319183939     | 1.355915161     |
| 2.323316376    | 2.32780637       | 0.065911905     | 2.327442415     | 0.05664331      |
| 0.222017644    | 3.959397903      | 0.19380846      | 0.239558283     | 1.64695645      |
| 0.160428586    | 3.727941306      | 0.141760626     | 0.171788435     | 1.488768313     |
| 0.262084547    | 3.379349815      | 0.227009822     | 0.284204562     | 0.186622945     |
| 0.025810951    | 2.447845052      | 0.023444102     | 0.027186026     | 0.020399702     |
| 2.113653937    | 2.916067801      | 0.119423269     | 3.795156224     | 1.417711073     |
| 2.109207221    | 5.104579045      | 0.118339991     | 2.566726197     | 0.100192591     |
| 0              | 0.696438963      | 0.694501988     | 0               | 2.376417676     |
| 0              | 4.55185958       | 0               | 0.979015821     | 3.779580246     |
| 1.198014642    | 4.09994896       | 0.050927398     | 0.059656169     | 1.801302817     |
| 0.077811591    | 2.346724277      | 0.069918051     | 0.082479419     | 1.252721511     |
| 0.036356625    | 4.443142998      | 0.03295006      | 0.038342811     | 0.028590656     |
| 0              | 3.5472338        | 0               | 0.496896728     | 0.500454682     |
| 0              | 4.643385465      | 0               | 0               | 0               |
| 0.540008536    | 4.261222643      | 1.00412929      | 1.632678296     | 1.018398815     |
| 0.758858203    | 3.416351976      | 0               | 0               | 0               |
| 0.088182936    | 4.839341014      | 0.079068842     | 0.093591784     | 0.067693044     |
| 0.249440477    | 3.854510431      | 0.21658707      | 0.270067314     | 0.178542724     |
| 0.115748242    | 4.566003002      | 0.10320362      | 0.123264177     | 2.436508506     |
| 0              | 5.47382807       | 0               | 0               | 1.766924321     |
| 0.076266811    | 1.900854691      | 0.06855175      | 0.080826678     | 1.248012405     |
| 0.019774445    | 3.103163518      | 0.017983875     | 0.020812606     | 1.664071046     |
| 0.091442074    | 3.014347531      | 0.081936452     | 0.097089612     | 1.92235317      |
| 0.060183242    | 3.103738539      | 0.054274913     | 0.063656097     | 1.198280232     |
| 1.392255764    | 3.115028323      | 0.102852611     | 0.122828808     | 2.000031692     |
| 1.81239108     | 4.81032113       | 1.187653558     | 2.246801451     | 0.042354346     |
| 0              | 4.219537517      | 0               | 0               | 0.937706937     |
| 0              | 3.968146286      | 0               | 2.695901519     | 0               |
| 0.147518642    | 0.160574813      | 3.614963997     | 0.157713016     | 2.098938507     |
| 0.173715602    | 2.719442238      | 0.153095485     | 0.186321792     | 0.128376136     |
| 0.103754881    | 4.318543318      | 0.092735914     | 0.110329406     | 1.330105098     |
| 0              | 5.904633803      | 0               | 0               | 1.829772993     |
| 1.008821567    | 3.71389732       | 0.002224641     | 0.002559775     | 0.001948071     |
| 0              | 3.871113517      | 1.156655987     | 0               | 2.316142711     |
| 0.049299124    | 1.793312696      | 0.044559699     | 0.052074594     | 3.213380673     |
| 0.019416262    | 2.091184755      | 0.017659452     | 0.020434726     | 1.066174886     |
| 0.013057032    | 2.875065041      | 0.011891487     | 0.013731285     | 0.01038297      |
| 7.643371219    | 2.645432286      | 0               | 7.441477038     | 0               |

|             |             |             |             |             |
|-------------|-------------|-------------|-------------|-------------|
| 0           | 3.11562858  | 0           | 0           | 1.088442424 |
| 0           | 4.103639162 | 0           | 0           | 0.868777171 |
| 0           | 3.673785619 | 1.21807882  | 0           | 0.7099846   |
| 0           | 4.381924175 | 0           | 0.66891387  | 2.837446    |
| 0.032179201 | 2.47789289  | 0.029189493 | 0.033919878 | 1.108502098 |
| 0           | 4.483139134 | 0           | 0           | 2.364263533 |
| 0           | 3.712787372 | 0           | 0           | 1.203698211 |
| 0.008359375 | 2.039683924 | 0.0076207   | 0.008786018 | 0.006662478 |
| 0           | 4.207359732 | 5.132474931 | 0           | 2.289450211 |
| 0.060302985 | 5.017324365 | 0.054381554 | 0.063783683 | 1.815157693 |
| 0.055980522 | 3.280443297 | 0.050528717 | 0.059180445 | 0.043617894 |
| 0.985451174 | 3.884429925 | 0           | 0           | 0.986077293 |
| 2.974860071 | 2.297884389 | 0           | 1.97705254  | 0.983404952 |
| 0           | 3.836779801 | 0           | 0           | 1.971644398 |
| 0           | 3.592198101 | 0           | 0           | 1.914607546 |
| 0.051635645 | 3.432336024 | 1.178709567 | 0.05455823  | 0.040314484 |
| 0.180775263 | 3.372251629 | 0.159093885 | 0.194063056 | 1.5425581   |
| 1.006639634 | 7.267912249 | 1.592827208 | 2.008762821 | 3.008540879 |
| 0.316404613 | 0.353851783 | 0.271226917 | 0.345449362 | 1.865446549 |
| 0.008607313 | 5.440976635 | 0.007846319 | 0.009046883 | 0.006859264 |
| 0.283118255 | 3.732943817 | 0.244238301 | 0.307821099 | 0.199887282 |
| 0.013447386 | 4.322281266 | 0.012245991 | 0.014142469 | 1.63917013  |
| 0           | 4.416227597 | 0           | 0           | 1.382036805 |
| 1.288034233 | 4.592727198 | 0.074754467 | 0.088343204 | 0.064078765 |
| 0           | 3.587655632 | 3.066715736 | 0           | 3.487825406 |
| 0           | 4.891482257 | 0           | 0           | 0.859279637 |
| 1.153427623 | 1.152646736 | 0.039280429 | 0.045815798 | 1.144991459 |
| 0           | 4.141264674 | 0           | 0           | 1.977738243 |
| 0           | 4.246933858 | 0.868917241 | 0           | 0.872569039 |
| 0.063100999 | 3.313739002 | 0.056871915 | 0.066766041 | 1.207398746 |
| 0.206316431 | 4.377166188 | 0.180657862 | 0.222183236 | 1.607913803 |
| 0.135820074 | 4.101334657 | 0.120609662 | 1.458308055 | 0.102049368 |
| 0           | 2.097782935 | 0           | 0           | 1.197901394 |
| 0           | 2.199416209 | 0           | 0           | 0           |
| 0           | 3.568662906 | 1.822150146 | 4.899286608 | 2.404652971 |
| 0.02861832  | 3.610851759 | 0.025978773 | 0.030153279 | 1.096783983 |
| 0           | 4.118297955 | 0           | 0.96707754  | 0           |
| 1.004919571 | 2.591964186 | 0.001240115 | 0.001426421 | 1.004701219 |
| 0.062744848 | 5.790363224 | 0.056555084 | 0.066386313 | 2.580588339 |
| 0.883822562 | 5.133388646 | 1.848954197 | 0.884396107 | 1.856326036 |
| 0           | 1.701757345 | 0           | 0           | 1.72145356  |
| 0           | 3.754127067 | 0           | 0           | 0.966987927 |
| 0.063991912 | 4.418808561 | 0.057664267 | 0.067716079 | 2.256616373 |
| 0.326653405 | 3.233205935 | 0.279469726 | 0.35709833  | 0.226665261 |
| 0           | 4.971800319 | 0           | 0           | 2.134165459 |
| 0           | 4.325798706 | 0           | 0.91636495  | 0.919193685 |
| 0           | 4.861221143 | 0           | 0           | 0.865879069 |
| 0           | 4.345402771 | 0.412949369 | 0           | 1.455911622 |
| 0.02401392  | 1.085306942 | 0.021820067 | 0.025287718 | 0.018995724 |
| 0.004393872 | 5.451257838 | 0.004008957 | 0.004615896 | 2.019059287 |
| 0.025970714 | 4.140442756 | 0.023588426 | 0.027354833 | 1.088025744 |
| 0.794036369 | 3.257179331 | 0.795212872 | 0.795199466 | 1.739746904 |
| 5.550272833 | 2.72779107  | 1.131525356 | 6.746532478 | 0.643562843 |
| 0.101881623 | 3.288958003 | 0.091096367 | 0.10831254  | 0.077722469 |
| 0           | 2.049723699 | 0           | 0           | 0.769284563 |
| 0           | 4.172821414 | 0.787988496 | 0           | 0.793197984 |
| 0           | 3.349645181 | 0           | 0           | 1.564455316 |
| 0.910429994 | 3.76633152  | 4.453563156 | 0.910850999 | 2.689779203 |



|             |             |             |             |             |
|-------------|-------------|-------------|-------------|-------------|
| 0.056809639 | 3.611139041 | 0.051268285 | 0.060063042 | 1.187682894 |
| 0           | 4.623218017 | 0           | 0           | 0.611294556 |
| 0.10704012  | 4.52805167  | 1.357397614 | 0.113868736 | 1.973469169 |
| 0           | 3.604389808 | 0           | 0           | 1.2604589   |
| 4.881875762 | 5.80250023  | 0.064900798 | 6.180710864 | 1.235386242 |
| 0.033556147 | 3.497335581 | 1.117554147 | 0.03537725  | 2.139909934 |
| 0.022335735 | 3.820659111 | 0.020302334 | 0.023515703 | 0.017682423 |
| 0           | 4.920050907 | 1.357923105 | 0           | 1.913571001 |
| 0.39692727  | 6.218171552 | 0.335165306 | 0.437787598 | 2.033118408 |
| 0.096138915 | 2.421958996 | 0.086062375 | 0.102135351 | 0.073533027 |
| 0.024140086 | 3.937460877 | 0.021934127 | 0.025420967 | 1.081947202 |
| 0.089177037 | 2.731393923 | 0.079943922 | 0.094658394 | 1.287013259 |
| 0.021156906 | 3.814482115 | 0.019235577 | 0.022271398 | 2.414286094 |
| 0.214259339 | 4.107833685 | 0.187320435 | 0.230964454 | 0.155623584 |
| 3.405903396 | 5.412134575 | 0.014681834 | 4.548113548 | 1.055132206 |
| 0           | 1.549547252 | 2.283220437 | 0           | 1.964702465 |
| 0.076247476 | 1.263814031 | 0.068534643 | 0.080805995 | 1.247953389 |
| 1.783041409 | 3.08607538  | 0           | 3.087588927 | 3.152524285 |
| 0           | 2.974114939 | 0           | 0           | 0           |
| 0.089243479 | 3.234305996 | 0.080002396 | 0.094729692 | 1.915014976 |
| 0.135912265 | 4.456162728 | 1.4457137   | 0.14509696  | 0.102114466 |
| 0           | 4.756701987 | 0.542070515 | 0           | 2.311238095 |
| 0           | 5.166342481 | 0           | 0           | 1.59733127  |
| 0           | 7.079329521 | 1.702508528 | 0           | 0.582368053 |
| 0.155440103 | 3.508216451 | 2.162572954 | 0.1663443   | 0.115786748 |
| 0           | 3.00138764  | 0           | 0           | 1.45731327  |
| 0.105993129 | 4.219933344 | 0.094693285 | 0.112740457 | 1.336634696 |
| 0.070906536 | 6.043185931 | 0.06380408  | 0.075096625 | 1.852468006 |
| 0.018772305 | 3.559956193 | 0.017076069 | 0.019755441 | 2.07983237  |
| 0.010792412 | 2.863469681 | 0.009833703 | 0.011346592 | 2.046400272 |
| 0.708775454 | 2.54461231  | 3.013796097 | 0.710578723 | 2.755301928 |
| 0           | 2.688203363 | 0.919856465 | 0           | 2.219364497 |
| 0           | 3.944903278 | 0           | 0           | 0           |
| 0.028028961 | 2.72519531  | 0.025446909 | 1.099677544 | 1.695999687 |
| 0           | 1.971903061 | 0           | 0           | 1.56087871  |
| 0.108427585 | 3.086301211 | 0.096820235 | 0.115364367 | 0.082471702 |
| 5.573678569 | 1.959051673 | 1.307890623 | 5.548154422 | 0.069981748 |
| 0.010851875 | 2.375706949 | 0.009887761 | 0.011409191 | 2.046652098 |
| 0           | 3.06216761  | 0           | 0           | 1.051762757 |
| 5.596113648 | 3.614166746 | 0           | 5.873965129 | 1.136007007 |
| 5.210327142 | 3.625928313 | 0.028649221 | 4.871118806 | 0.024890456 |
| 4.232416058 | 5.810222961 | 10.02559192 | 4.508398396 | 3.012080722 |
| 0.076578771 | 2.949629148 | 1.260726534 | 0.08116039  | 1.248964322 |
| 0           | 2.657642082 | 0           | 0           | 0.475598589 |
| 0.083825516 | 3.876364668 | 0.07522894  | 0.088919596 | 2.658209216 |
| 1.783310114 | 4.642517758 | 0.04257589  | 3.041658547 | 2.192884501 |
| 7.02579074  | 6.176634828 | 0.004299112 | 8.561951658 | 1.604160919 |
| 0           | 4.013290515 | 0           | 0           | 1.471255152 |
| 2.094027084 | 4.393444024 | 1.179744872 | 2.927425043 | 0           |
| 0           | 2.775967492 | 0           | 0.750509777 | 1.988414633 |
| 0           | 4.093816315 | 0.444346954 | 1.472020255 | 2.292249499 |
| 1.804073491 | 1.182892452 | 0.047187918 | 3.970169572 | 1.173230885 |
| 0           | 4.237893497 | 0           | 0           | 0.94878156  |
| 0           | 4.872812416 | 0           | 0           | 0.97933463  |
| 6.973641216 | 4.415127834 | 1.862486695 | 6.894771314 | 0.897937413 |
| 0           | 1.881101923 | 0           | 0           | 2.380991313 |
| 6.365161401 | 2.502174987 | 1.739574487 | 6.78729701  | 0.029384949 |
| 4.492560506 | 4.201008569 | 0           | 4.58392084  | 0           |

| hsa-miR-4664-5p | hsa-miR-518c-3p | hsa-miR-6716-3p | hsa-miR-154-3p | hsa-miR-141-3p |
|-----------------|-----------------|-----------------|----------------|----------------|
| 0.076222484     | 0.108221426     | 1.946041501     | 5.26464124     | 3.482850441    |
| 1.213706493     | 0.069842825     | 1.211305952     | 1.226103594    | 5.392087071    |
| 1.105949343     | 0.033498468     | 1.104874369     | 2.967436027    | 3.487123378    |
| 1.650535423     | 0.017384137     | 1.055277834     | 2.892024203    | 3.896875165    |
| 0.082151569     | 0.117228045     | 3.229796423     | 4.235648163    | 8.462746158    |
| 0.035598047     | 0.048852173     | 2.511352259     | 1.160139093    | 2.808871616    |
| 0.108474319     | 0.158320794     | 0.104565351     | 1.488289129    | 3.473269885    |
| 0.015432727     | 1.069896024     | 2.670509544     | 3.426426508    | 3.914147515    |
| 0.929882107     | 0               | 1.502360785     | 2.219815777    | 4.131820839    |
| 2.993756885     | 0.045962358     | 0.032503902     | 1.76757298     | 4.40113362     |
| 0               | 0               | 1.74529938      | 0.588212376    | 4.609614306    |
| 0.147770372     | 0.223207253     | 1.592090416     | 4.077239647    | 4.510381461    |
| 0.075804891     | 0.107590452     | 1.944192386     | 0.109857115    | 2.43402345     |
| 3.14618265      | 0               | 3.298495364     | 4.293211916    | 8.930159501    |
| 3.442655776     | 0.188786775     | 0.122519319     | 0.193405423    | 5.349037273    |
| 2.975744819     | 0.041225595     | 1.733932506     | 2.178264471    | 4.378511877    |
| 0               | 0               | 1.418313673     | 4.498752921    | 3.406214048    |
| 0               | 2.419866957     | 2.127825918     | 3.299922738    | 3.669012771    |
| 1.238258815     | 2.663103531     | 1.235523343     | 3.164286435    | 0.082016687    |
| 1.644611897     | 0.242982157     | 0.152992474     | 0.24948276     | 3.525415523    |
| 0.118205513     | 1.534939569     | 1.480369919     | 2.671135811    | 3.731199693    |
| 0.184809803     | 0.288551184     | 0.177278513     | 0.296830258    | 5.151732443    |
| 1.687182332     | 0.0274463       | 1.685891283     | 1.091164385    | 2.938843346    |
| 0.100228372     | 2.915527209     | 1.410898401     | 2.119232329    | 3.192080065    |
| 1.412944055     | 1.449362652     | 0.095828267     | 3.421470451    | 3.187027246    |
| 1.219070264     | 0               | 0.703183746     | 2.518899754    | 3.656037478    |
| 2.558251396     | 0               | 2.296069744     | 1.559435132    | 4.359083143    |
| 0.043626701     | 0.060270102     | 0.0422383       | 1.196218713    | 3.610087962    |
| 0.059550308     | 0.083369885     | 2.300845045     | 1.267788049    | 4.204382021    |
| 0.028382956     | 0.038719344     | 1.1206164       | 1.127710884    | 4.366438922    |
| 1.595256759     | 0               | 1.843459085     | 7.535487494    | 10.28171252    |
| 1.584623443     | 0               | 0.999715732     | 1.584598697    | 4.247457125    |
| 0               | 0.544224047     | 2.999913624     | 3.197451172    | 4.654803571    |
| 1.693414869     | 0.760836521     | 2.007101687     | 2.792001209    | 4.548125833    |
| 2.672354699     | 0.094625256     | 1.279876881     | 2.727520713    | 5.098874255    |
| 0.176829483     | 0.274111957     | 1.699022691     | 1.800294338    | 4.404112733    |
| 0.087030037     | 0.124706412     | 1.359118551     | 5.789061522    | 2.838914037    |
| 1.767539818     | 0               | 0               | 7.463479502    | 3.291412361    |
| 1.247352432     | 0.081696342     | 1.244489814     | 1.900146378    | 1.896377004    |
| 1.067225235     | 0.021008934     | 1.662863988     | 4.356902903    | 4.357231656    |
| 1.292959283     | 0.098169233     | 1.289433815     | 0.100198937    | 4.368594919    |
| 1.197776486     | 0.064316825     | 0.04495999      | 0.065556261    | 3.103200505    |
| 1.362603411     | 0.124264761     | 1.357985146     | 0.12696905     | 3.721462568    |
| 0.042037249     | 2.849161222     | 2.216392068     | 3.273269825    | 7.601158331    |
| 1.510971436     | 0               | 3.085923239     | 8.170602319    | 4.895324314    |
| 2.226148817     | 0               | 0               | 1.492701463    | 3.342873564    |
| 0.109324614     | 0.159679049     | 1.446200102     | 3.246484904    | 6.773379538    |
| 1.522327621     | 0.188763177     | 0.122505649     | 2.25891208     | 4.509086098    |
| 1.329160827     | 0.111588635     | 1.955866021     | 1.352798114    | 6.764480947    |
| 0               | 0               | 0.869057912     | 6.312624392    | 1.818309226    |
| 2.010568045     | 1.008769796     | 0.001878622     | 2.597513366    | 3.598390327    |
| 1.852010872     | 0               | 0               | 3.015425245    | 4.60813292     |
| 0.038246376     | 0.052601776     | 0.037042885     | 3.958432716    | 2.555200934    |
| 1.066027745     | 0.020627319     | 2.405332104     | 4.692763346    | 1.667730636    |
| 1.637473339     | 1.046711017     | 1.636832923     | 0.014096854    | 3.771810689    |
| 2.275306712     | 8.513779283     | 0               | 6.966709337    | 1.995740666    |

|             |             |             |             |             |
|-------------|-------------|-------------|-------------|-------------|
| 0           | 0           | 0.603012001 | 2.780407202 | 4.18735853  |
| 0.869008712 | 0           | 1.429452768 | 0           | 2.388326765 |
| 0           | 0           | 0.712225782 | 1.592809836 | 7.781665507 |
| 1.566253221 | 0           | 0           | 5.940020763 | 2.916920695 |
| 1.108249886 | 1.113955376 | 1.107149068 | 1.113280568 | 4.080193069 |
| 1.792187136 | 0           | 2.36794561  | 2.913186579 | 2.55947091  |
| 1.587517245 | 0           | 0           | 2.941621528 | 4.100561648 |
| 1.028698161 | 0.008866566 | 1.028429175 | 2.363446294 | 2.363124459 |
| 0           | 0           | 1.555883831 | 2.547817788 | 2.961648882 |
| 2.837062763 | 0.064445916 | 1.811271886 | 1.837082899 | 3.895613351 |
| 1.184605196 | 0.05978886  | 2.222538748 | 1.194707671 | 2.855870627 |
| 0           | 1.567277703 | 0           | 3.299953127 | 1.980974921 |
| 0.983438612 | 3.4331395   | 0.983586403 | 0.982873404 | 3.973006948 |
| 1.431633831 | 0           | 1.436665931 | 3.646277652 | 4.000656501 |
| 0           | 0           | 1.506146026 | 2.704640687 | 3.797440442 |
| 2.209575661 | 0.05511355  | 0.038750161 | 0.056154635 | 2.565721741 |
| 1.540726931 | 0.196639379 | 0.127048019 | 1.594984874 | 5.172518961 |
| 1.006330934 | 4.180187852 | 0.001413928 | 2.817000337 | 4.765389702 |
| 0.21819036  | 0.351209579 | 0.208867006 | 1.992942494 | 4.297358544 |
| 3.039499277 | 0.009129875 | 1.619347824 | 0.00928501  | 5.74995568  |
| 1.788229052 | 0.31269249  | 2.881434283 | 3.739248888 | 5.401162105 |
| 1.639017516 | 0.014273795 | 0.01030246  | 1.047808771 | 4.244676222 |
| 1.382499766 | 0           | 0.833226876 | 2.329956647 | 2.331755874 |
| 1.268590655 | 0.089308447 | 0.061469823 | 2.369251545 | 3.735745357 |
| 1.501929554 | 0           | 1.502844007 | 1.903369516 | 3.060313412 |
| 0           | 0           | 1.417988827 | 3.231731374 | 3.23229827  |
| 0.033769855 | 1.152819013 | 2.175425641 | 3.546967742 | 2.797635774 |
| 0.982411272 | 0           | 1.978097856 | 4.05874636  | 3.556793305 |
| 0           | 0           | 1.434021501 | 3.876225889 | 5.509171389 |
| 1.824317226 | 0.067463643 | 0.047066972 | 2.284513645 | 3.487162134 |
| 1.605767045 | 2.835168469 | 0.143232134 | 1.672389472 | 2.831440839 |
| 2.498845468 | 0.146763405 | 1.414640971 | 2.578225401 | 3.631642723 |
| 1.581113578 | 0           | 0.687229917 | 3.055258141 | 2.802928884 |
| 2.233385651 | 0.74346219  | 0           | 2.412752277 | 3.0459018   |
| 1.324436814 | 0           | 0.513379704 | 0           | 4.298648458 |
| 0.022426338 | 0.030443935 | 1.095591103 | 0.030987984 | 3.472611869 |
| 0           | 0           | 1.547893769 | 3.756112742 | 5.470186988 |
| 1.590504326 | 2.006494548 | 2.32792457  | 5.217248336 | 4.708215234 |
| 1.205759944 | 0.067079389 | 1.203465191 | 1.84681999  | 4.327438809 |
| 0.888228639 | 0.884658128 | 0           | 0.885359537 | 4.717496913 |
| 0           | 0           | 2.036905686 | 2.661765494 | 1.705459633 |
| 0.967053621 | 0           | 0           | 2.274076222 | 2.274458355 |
| 2.25569813  | 0.068425031 | 0.047709037 | 4.332442051 | 2.620641357 |
| 1.883953301 | 0.363146892 | 0.214664404 | 2.75658541  | 4.125350397 |
| 1.41650938  | 0           | 0.860814633 | 0           | 3.470693742 |
| 0.919345555 | 0           | 0.920014522 | 2.463658291 | 1.4839296   |
| 0           | 0           | 1.829782731 | 3.242629305 | 4.358861005 |
| 2.376445257 | 0           | 2.242224355 | 3.489608477 | 12.60653695 |
| 1.680269741 | 0.025528758 | 1.679071753 | 3.296176572 | 6.943673178 |
| 2.018999785 | 0.004657789 | 2.341235041 | 2.830396786 | 5.382876049 |
| 0.020377991 | 0.027616825 | 1.68649612  | 5.636387205 | 4.229238814 |
| 2.528102025 | 2.027873285 | 0.802052175 | 2.683826184 | 3.98380943  |
| 1.822884263 | 7.087502827 | 1.828215205 | 4.32026431  | 3.469219095 |
| 0.077096786 | 0.109543905 | 1.319702646 | 1.346723168 | 4.90807685  |
| 1.362019766 | 0           | 2.740893125 | 5.55620426  | 3.889854065 |
| 1.730827971 | 0           | 2.711692746 | 0           | 5.521454172 |
| 2.522602728 | 0           | 2.125775268 | 3.953368528 | 3.755000565 |
| 0           | 0.911051252 | 0           | 2.19651985  | 3.44599636  |

|             |             |             |             |             |
|-------------|-------------|-------------|-------------|-------------|
| 3.242216907 | 0.060681703 | 1.185158081 | 3.612143593 | 7.077803412 |
| 1.103546956 | 0           | 1.778881454 | 4.345887604 | 3.770321571 |
| 1.338701701 | 2.01887891  | 0.078038144 | 0.11764019  | 1.357595808 |
| 0.915017933 | 0           | 1.267316121 | 2.529128546 | 3.481632312 |
| 1.234767076 | 6.52586352  | 0.053556205 | 1.248955418 | 7.933965287 |
| 1.716642369 | 0.035722343 | 0.025428068 | 3.497864258 | 3.636424444 |
| 1.075766912 | 1.681445424 | 2.092894646 | 1.681120873 | 3.287289236 |
| 2.124962746 | 0.54352203  | 1.677274745 | 0           | 4.078324598 |
| 0.265172854 | 0.446005886 | 0.253126541 | 2.216851354 | 3.450440982 |
| 0.072945936 | 0.103282502 | 0.07048388  | 3.463848347 | 3.793678169 |
| 1.680756024 | 0.025663352 | 1.679551517 | 1.085337719 | 2.705610028 |
| 1.28622232  | 0.095705881 | 1.282797406 | 4.255827262 | 3.762460209 |
| 2.089391168 | 0.022482204 | 2.088136158 | 2.916188521 | 6.142401988 |
| 0.154183684 | 0.234221076 | 1.615927723 | 3.498893144 | 3.734348081 |
| 0.012718896 | 5.17728297  | 1.054481007 | 1.057268363 | 3.546267969 |
| 0           | 1.961401196 | 0           | 1.549657652 | 3.126353612 |
| 1.247293608 | 0.0816754   | 1.244431818 | 0.083308126 | 3.176366452 |
| 0.640285179 | 2.232212965 | 2.072948613 | 4.312992793 | 3.19031432  |
| 1.978902952 | 0           | 0           | 1.976874519 | 3.432828174 |
| 2.345762958 | 0.095778117 | 0.065662086 | 0.097748862 | 5.103837555 |
| 0.101253388 | 0.146865014 | 2.490526369 | 1.455647665 | 3.808188237 |
| 1.919295864 | 0           | 1.025514118 | 5.731469442 | 4.918221954 |
| 2.875816333 | 0           | 1.217325708 | 3.48206812  | 4.673749076 |
| 0.582851287 | 0           | 2.378302182 | 3.579059055 | 2.476232639 |
| 2.12031675  | 0.168449884 | 0.11060353  | 0.172427083 | 4.646425675 |
| 0.893544051 | 0           | 2.855290276 | 3.526763905 | 4.070662847 |
| 0.080055173 | 0.114033233 | 1.331482307 | 1.360044216 | 4.529057783 |
| 0.054443585 | 0.075895111 | 1.847845708 | 0.077394087 | 4.763030119 |
| 2.403871812 | 0.019941335 | 1.063251898 | 2.679890024 | 4.860042514 |
| 0.008531904 | 0.011451256 | 2.632700638 | 2.051034101 | 2.374979777 |
| 1.238411408 | 0.711256118 | 1.935939735 | 2.544584709 | 6.337425235 |
| 0.922406616 | 0           | 0.923052511 | 1.892402981 | 1.487765319 |
| 1.95712683  | 0           | 0.966409423 | 1.541993557 | 3.944640463 |
| 1.094620412 | 1.705478886 | 0.021303432 | 1.705083109 | 3.85090774  |
| 1.974400835 | 0           | 0.979901727 | 0           | 2.554823374 |
| 2.410732711 | 0.116693947 | 0.078993661 | 1.367910192 | 4.539932918 |
| 1.292519894 | 6.04979668  | 1.289001012 | 1.958280569 | 3.012515794 |
| 1.037175191 | 0.011514448 | 1.036823609 | 0.011711232 | 2.863563355 |
| 1.958227719 | 0           | 2.176459022 | 4.224045331 | 12.27568569 |
| 0.637309694 | 6.033669618 | 0.639365907 | 2.227568646 | 3.536891454 |
| 1.106286817 | 6.30248098  | 0.023955933 | 0.03421359  | 2.47392763  |
| 0           | 5.073938353 | 1.850464818 | 5.750600648 | 9.578198488 |
| 1.248301241 | 0.082034244 | 0.056716607 | 3.179130696 | 13.1777969  |
| 0           | 0.907454969 | 2.006856435 | 3.927416022 | 3.779021532 |
| 1.270207883 | 0.089892272 | 1.267018327 | 4.122928506 | 3.408443403 |
| 1.156415126 | 3.563912719 | 1.764413259 | 3.704098418 | 4.499806512 |
| 1.016228222 | 7.526704247 | 1.603880358 | 1.016832459 | 6.436788401 |
| 1.878638322 | 0           | 1.472754662 | 1.464549707 | 1.466009351 |
| 0           | 2.926572252 | 1.196262182 | 3.618148142 | 3.53781805  |
| 0           | 0           | 1.993290515 | 3.83234479  | 2.925063979 |
| 2.133769986 | 0.874802684 | 1.962206066 | 0.452823559 | 4.444357287 |
| 1.172801259 | 3.854727598 | 1.17093161  | 0.05681699  | 3.589889095 |
| 0           | 0           | 0           | 4.958865224 | 3.377766308 |
| 0.979376349 | 0           | 0.979559562 | 0           | 4.358267902 |
| 0           | 7.710310609 | 0           | 2.173201292 | 3.159454539 |
| 0.704249697 | 0           | 2.387704466 | 3.305881933 | 6.398824438 |
| 1.125210905 | 8.971784724 | 0.02827087  | 0.040547394 | 2.170801981 |
| 1.354790899 | 5.73856649  | 2.325866002 | 3.490809958 | 3.014284525 |

| hsa-miR-515-3p | hsa-miR-373-3p | hsa-miR-526b-3p | hsa-miR-6715b-3p | hsa-miR-337-5p |
|----------------|----------------|-----------------|------------------|----------------|
| 0.10542835     | 0.110229269    | 0.083662003     | 1.343899778      | 1.294504526    |
| 0.068170378    | 0.07104094     | 0.054905426     | 1.857489045      | 0.040658398    |
| 0.032755634    | 1.110947567    | 0.026764451     | 5.126488568      | 0.020129211    |
| 0.017012326    | 1.058163378    | 0.013991215     | 2.891972275      | 0.010598581    |
| 0.114151378    | 2.025232155    | 0.090273612     | 3.088802967      | 1.316117254    |
| 0.047732286    | 0.049652948    | 0.038763712     | 3.558315501      | 0.028959958    |
| 0.153851216    | 0.161548618    | 0.11980655      | 1.489779336      | 0.085748792    |
| 1.070171034    | 0.021150615    | 0.016738561     | 2.418206823      | 2.399284984    |
| 0              | 0.927765166    | 0               | 4.054563792      | 0              |
| 0.044915191    | 0.046710944    | 0.036517823     | 0.046382153      | 0.02731597     |
| 0              | 0              | 0               | 0                | 0              |
| 0.21620895     | 0.228292074    | 0.164439167     | 0.226050191      | 2.1858457      |
| 0.104816951    | 0.10958411     | 0.083196901     | 3.480127091      | 0.060683722    |
| 0              | 0              | 0               | 1.975792755      | 1.979821179    |
| 0.183179973    | 0.19284738     | 0.141057648     | 3.067431605      | 0.099888443    |
| 0.040295868    | 0.04188995     | 0.032823981     | 5.164077883      | 0.024603259    |
| 0              | 1.386396535    | 0               | 0.566788375      | 2.212071088    |
| 1.318354956    | 0.367108173    | 0.35961489      | 1.894765725      | 1.84689268     |
| 0.076556112    | 0.079838697    | 0.061452083     | 1.889005302      | 0.045345462    |
| 0.235133388    | 0.248695628    | 0.177582367     | 0.246175455      | 0.12353654     |
| 0.168940608    | 0.1776311      | 0.130798723     | 5.005014765      | 0.09309878     |
| 0.278601256    | 1.837765157    | 0.207100173     | 2.554165392      | 0.142082925    |
| 1.696210753    | 1.091246634    | 0.021988919     | 5.871111461      | 0.016581934    |
| 1.45426844     | 2.119448771    | 2.077977125     | 1.452419142      | 0.079479639    |
| 0.13990857     | 0.146726717    | 0.109537047     | 0.145469317      | 0.078810141    |
| 0              | 0.697617474    | 0               | 2.962200538      | 0.714839801    |
| 0              | 0              | 0               | 1.972117754      | 0              |
| 0.058854954    | 0.061283028    | 0.047581209     | 1.196881729      | 0.035375581    |
| 0.081318711    | 0.084841094    | 0.065150748     | 2.346737464      | 0.047979148    |
| 0.037850872    | 0.039339792    | 0.030863206     | 1.128147589      | 0.023158802    |
| 0              | 0.500449068    | 0               | 1.281348809      | 0.985220244    |
| 0              | 0              | 0               | 2.321512083      | 0.999731004    |
| 0.542052588    | 0              | 0               | 0                | 0              |
| 0              | 0              | 0               | 1.28692664       | 0.777483133    |
| 0.092245463    | 0.096333899    | 0.07358389      | 1.946933361      | 0.053945874    |
| 1.802789949    | 0.280874915    | 0.197860489     | 0.277889715      | 0.136329505    |
| 0.121388335    | 0.127095246    | 0.095724859     | 4.017991358      | 2.9850293      |
| 0              | 4.280745222    | 0               | 2.058262163      | 1.383181619    |
| 0.079692985    | 0.08313304     | 0.063889773     | 3.177234754      | 0.047082411    |
| 0.020555873    | 0.021332107    | 0.016880717     | 2.909168591      | 0.012766526    |
| 0.095683434    | 0.099954559    | 0.076222247     | 3.244360645      | 0.055801818    |
| 0.062793993    | 0.065407221    | 0.050684954     | 2.272247071      | 0.037619333    |
| 0.120961091    | 0.126643127    | 0.095403887     | 3.545435572      | 0.069144261    |
| 0.056642258    | 1.189245414    | 0.045833402     | 2.24697412       | 1.166369977    |
| 0              | 0              | 0               | 4.219376783      | 1.516428658    |
| 1.492185254    | 0              | 0               | 0.924868694      | 0.931472741    |
| 0.155160663    | 2.968196216    | 0.120765433     | 2.167062432      | 0.086393095    |
| 0.18315729     | 1.573816577    | 0.141041392     | 2.259524406      | 0.099877737    |
| 0.108690452    | 0.113672675    | 0.086139783     | 4.420451461      | 0.062733076    |
| 0              | 0              | 0               | 0                | 3.29219501     |
| 0.002529518    | 0.002620901    | 0.002092885     | 3.472769826      | 1.007881728    |
| 0              | 0              | 0               | 2.761843359      | 0.677726402    |
| 0.051386323    | 0.053471174    | 0.041669205     | 3.0531097        | 0.031080797    |
| 0.020182872    | 0.020944336    | 0.01657696      | 3.101416957      | 0.012538954    |
| 0.013564648    | 0.014068265    | 0.011171746     | 4.320285836      | 0.008476346    |
| 7.8799187      | 9.921256049    | 6.085619257     | 5.040438159      | 3.293329862    |

|             |             |             |             |             |
|-------------|-------------|-------------|-------------|-------------|
| 0           | 0           | 0           | 2.344818958 | 2.261691631 |
| 0           | 0           | 0           | 2.794279909 | 0           |
| 0           | 0           | 0           | 2.844739943 | 0           |
| 0           | 2.782295357 | 0           | 2.290555744 | 0.689068578 |
| 0.033488915 | 0.034792938 | 0.027355377 | 0.034554381 | 0.020566842 |
| 0           | 0           | 0           | 0           | 1.808207444 |
| 0           | 0.686232915 | 0           | 3.554612507 | 0           |
| 0.008680622 | 0.008999062 | 0.007163823 | 3.044240599 | 1.026862183 |
| 0           | 0.974326932 | 0           | 6.900923809 | 0           |
| 0.062919622 | 0.065538803 | 0.050783781 | 1.21000049  | 0.037690654 |
| 0.058386412 | 0.060792653 | 0.047211368 | 4.380581296 | 0.035107716 |
| 0           | 0           | 0           | 0.985578272 | 1.983972876 |
| 2.782218499 | 1.97708721  | 1.978384658 | 4.496325408 | 0.984455376 |
| 0           | 0           | 0           | 3.775821317 | 1.091492742 |
| 0           | 0           | 0           | 0           | 1.511122038 |
| 0.053833316 | 0.05602949  | 0.043610121 | 5.133313678 | 0.032493817 |
| 0.190725073 | 2.745855889 | 0.146449464 | 3.093640359 | 0.103430354 |
| 4.332122972 | 1.592996426 | 1.006473751 | 1.593009443 | 0.001201567 |
| 0.338049738 | 0.360890132 | 0.246032737 | 7.286951989 | 0.165831594 |
| 0.008938291 | 0.009266393 | 0.007375678 | 3.954431887 | 0.005608272 |
| 0.301549737 | 0.320858424 | 0.222320296 | 5.295440903 | 0.151460446 |
| 0.013970679 | 0.014489885 | 0.011504211 | 0.014395036 | 0.008726947 |
| 0           | 0           | 0           | 3.18618983  | 0           |
| 0.087085414 | 0.090903775 | 0.069610515 | 0.090202448 | 0.051141155 |
| 0           | 10.00584791 | 0           | 2.700363357 | 0           |
| 0           | 0           | 0           | 5.826071604 | 0.867150951 |
| 1.153370892 | 0.047027453 | 0.036759742 | 0.046696207 | 0.027493249 |
| 0           | 1.975664872 | 0           | 4.141219985 | 0           |
| 0           | 0.869577975 | 0           | 4.179818125 | 0.879797519 |
| 0.065855974 | 0.068615107 | 0.053090846 | 2.889615457 | 0.039353447 |
| 0.218187025 | 0.230421501 | 0.165821472 | 0.228151174 | 0.116008995 |
| 0.142701978 | 0.14969334  | 0.111603316 | 4.457248096 | 1.384357419 |
| 0           | 0           | 0           | 4.203759602 | 0           |
| 0           | 0.744784156 | 0           | 2.910789844 | 0.760773249 |
| 0           | 0.95671928  | 0           | 2.939247394 | 0           |
| 0.029773375 | 0.030922645 | 0.024357493 | 6.065197873 | 1.090012946 |
| 0           | 1.544847924 | 0           | 0.967235981 | 1.550297444 |
| 1.004910788 | 0.001460388 | 0.001166833 | 1.590925527 | 0.000890391 |
| 0.065482131 | 0.068223358 | 0.052797423 | 0.067720689 | 0.039142194 |
| 0           | 0           | 0           | 5.0207525   | 0           |
| 0           | 0           | 0           | 1.313935766 | 0.797808336 |
| 0           | 0.965948505 | 0           | 1.543090383 | 0           |
| 0.066791253 | 0.069595296 | 0.053824545 | 0.069081057 | 0.03988139  |
| 0.349333524 | 0.373320147 | 0.253243795 | 2.755760045 | 0.170146243 |
| 0           | 0           | 0           | 4.891398482 | 0           |
| 0           | 0           | 0           | 2.204281555 | 0           |
| 0           | 0           | 0           | 3.778511455 | 0.873433772 |
| 0           | 0           | 0.415296165 | 0           | 0           |
| 0.024972588 | 0.025925635 | 0.020470413 | 4.300891591 | 0.015450016 |
| 0.004561068 | 1.01571225  | 0.003770561 | 0.004696449 | 0.002872956 |
| 0.027012347 | 0.028048252 | 0.022123831 | 2.715241617 | 1.081912422 |
| 2.281716854 | 0           | 1.732922302 | 3.752741582 | 1.35961526  |
| 6.443887214 | 2.859534509 | 5.475036508 | 2.2385903   | 1.169984971 |
| 0.106709678 | 1.347025222 | 0.08463601  | 4.902511949 | 0.061686658 |
| 0           | 0           | 0           | 0           | 1.851729402 |
| 0           | 0           | 0           | 1.322110066 | 1.351278653 |
| 0           | 0           | 0           | 1.834816527 | 0           |
| 0.910658515 | 4.24934995  | 0           | 2.865696023 | 0.918927794 |

|             |             |             |             |             |
|-------------|-------------|-------------|-------------|-------------|
| 0.059255675 | 0.061702455 | 0.047897405 | 1.198177629 | 0.035604509 |
| 0           | 1.088733112 | 0           | 1.977112566 | 0.627399514 |
| 0.112165892 | 6.032995671 | 0.08877267  | 5.178876044 | 1.311230375 |
| 0           | 0           | 0           | 0.469744261 | 1.591129144 |
| 6.300903959 | 5.331499603 | 3.316063217 | 2.930220793 | 0.044678654 |
| 0.034926317 | 0.036290885 | 0.028512699 | 0.036041225 | 1.105001285 |
| 1.079818614 | 0.024106446 | 0.01905067  | 4.028104055 | 0.014389974 |
| 0           | 0           | 0           | 1.351668512 | 0           |
| 0.427287116 | 2.217371426 | 0.301596631 | 0.45374582  | 0.198445483 |
| 0.100641618 | 1.328326613 | 0.080014686 | 4.48068317  | 0.058460701 |
| 1.086181983 | 1.085414726 | 0.020577085 | 2.112831533 | 0.015529594 |
| 0.093293893 | 0.097437809 | 0.074389231 | 0.096676327 | 0.05451293  |
| 0.021995753 | 0.022829238 | 0.01805242  | 2.916115608 | 1.662369328 |
| 0.226753686 | 0.239652396 | 0.171784943 | 1.698059364 | 0.119836004 |
| 3.994034771 | 1.057320068 | 3.076454088 | 0.017275783 | 0.010445631 |
| 1.961428956 | 0.971210431 | 0           | 0           | 0           |
| 0.079672639 | 0.083111667 | 0.063873982 | 9.136412457 | 0.047071173 |
| 1.488585217 | 0           | 1.132085263 | 1.781628636 | 1.165310863 |
| 0           | 0           | 0           | 2.297652136 | 0           |
| 0.093363973 | 0.097511605 | 0.074443039 | 0.096749436 | 0.0545508   |
| 0.142800054 | 0.149797525 | 0.111675782 | 2.922299268 | 1.384585508 |
| 0           | 0           | 0           | 4.177653857 | 1.717276019 |
| 0           | 0           | 0           | 3.391575782 | 1.236086143 |
| 0           | 0.580697232 | 0           | 1.405071789 | 1.467330662 |
| 0.163612067 | 0.171946926 | 0.126931367 | 4.428914578 | 0.090521795 |
| 0           | 0           | 0           | 1.449628601 | 0           |
| 0.111058056 | 0.116173114 | 0.087934183 | 0.115231899 | 0.063979621 |
| 0.074055405 | 0.077213761 | 0.059504393 | 1.245649897 | 0.043954429 |
| 0.019512338 | 1.066610708 | 0.01603067  | 11.51052769 | 1.059659137 |
| 0.01120966  | 0.011623447 | 0.009241228 | 2.640014483 | 1.034590588 |
| 0           | 0           | 0           | 4.894846617 | 0           |
| 0           | 1.486508243 | 0           | 4.870134759 | 0.926899056 |
| 0           | 0           | 0           | 0           | 0           |
| 0.029158652 | 0.030282561 | 1.096993575 | 4.908608328 | 0.01797449  |
| 0           | 0           | 0           | 0.978963957 | 1.976575946 |
| 0.113634315 | 0.118895104 | 0.089882958 | 4.707150977 | 1.314846433 |
| 5.04002832  | 0.099790074 | 4.095545878 | 3.77075444  | 0.055717746 |
| 0.011271483 | 0.011687615 | 0.009291956 | 3.86692549  | 0.007057641 |
| 0           | 0           | 0           | 2.295113557 | 1.079815702 |
| 5.780771084 | 0           | 4.372819272 | 2.570303824 | 0           |
| 5.169960226 | 2.146474931 | 4.73446397  | 2.475105644 | 0.020193407 |
| 4.25914827  | 6.968898828 | 3.41946079  | 0.947370192 | 0.522096911 |
| 0.080021254 | 1.26393366  | 0.064144523 | 2.677709599 | 2.598865121 |
| 0           | 0.476152844 | 0           | 3.49336283  | 0.493395329 |
| 0.087652159 | 0.091499942 | 0.070047717 | 5.89207792  | 0.051450338 |
| 2.214994421 | 1.1646364   | 1.160620739 | 1.784159595 | 0.02973557  |
| 7.494072763 | 4.274395017 | 5.667131744 | 1.016890615 | 1.015201539 |
| 0           | 0           | 0           | 2.183265553 | 0           |
| 1.175478202 | 2.091039423 | 0           | 0.676570954 | 2.166246567 |
| 0           | 0           | 0           | 3.674774522 | 2.015422362 |
| 0           | 4.539026463 | 0           | 1.20536411  | 1.271627917 |
| 2.569013695 | 3.26332414  | 2.815862111 | 10.161913   | 0.032857701 |
| 0           | 0           | 0           | 4.375010005 | 0           |
| 0           | 0           | 0           | 1.971435163 | 0           |
| 7.169844781 | 1.858495739 | 4.549779797 | 1.858340807 | 0           |
| 0           | 0           | 0           | 3.580995575 | 0           |
| 7.177872411 | 5.291551153 | 4.982772786 | 4.370442315 | 0.023794153 |
| 4.765636748 | 2.041549991 | 4.171043061 | 0.805160956 | 0.819297946 |

| hsa-miR-3117-3p | hsa-miR-7705 | hsa-miR-205-5p | hsa-miR-25-5p | hsa-miR-521 |
|-----------------|--------------|----------------|---------------|-------------|
| 2.39504555      | 2.416479403  | 5.370833129    | 0.066209574   | 0.074752585 |
| 1.217445182     | 1.224356007  | 2.899633313    | 0.043969807   | 0.049356392 |
| 0.025890226     | 2.140275248  | 1.719006123    | 0.021690245   | 0.024205104 |
| 0.013547041     | 2.398877221  | 0.017852701    | 1.053540498   | 0.012688458 |
| 1.987723715     | 2.446889164  | 2.813709372    | 0.071250618   | 0.080549122 |
| 0.037464366     | 4.39159546   | 0.050268614    | 0.031254484   | 0.034966402 |
| 0.115114662     | 1.477786008  | 0.164048649    | 0.093452053   | 0.10625275  |
| 0.016203858     | 2.413709914  | 4.809852526    | 0.013623758   | 0.015170908 |
| 3.60026839      | 1.905500956  | 0              | 0             | 0           |
| 1.146050269     | 3.375490369  | 0.047286377    | 2.166369333   | 0.032956419 |
| 1.435913313     | 3.129313525  | 0              | 3.208393085   | 0           |
| 0.15750536      | 2.768298646  | 6.786004695    | 0.126074579   | 0.144533601 |
| 0.080148301     | 2.748480222  | 0.111122897    | 0.065853957   | 0.07434423  |
| 0               | 2.560078213  | 4.778272998    | 1.97913345    | 0           |
| 0.135330457     | 3.707686872  | 2.719377724    | 2.569009607   | 0.124562443 |
| 3.345002655     | 0.035283445  | 4.854494567    | 1.123821496   | 0.029646382 |
| 0.566570452     | 2.129878663  | 1.036362761    | 1.434980913   | 0.570943914 |
| 1.081041382     | 0.751780989  | 0              | 1.114728841   | 1.092808947 |
| 1.242529412     | 1.250473731  | 1.25146241     | 2.271285695   | 1.236723766 |
| 1.66082081      | 2.821939483  | 7.250191505    | 2.253071682   | 0.155681703 |
| 0.12557869      | 2.964783255  | 0.180459138    | 2.098704053   | 0.115742564 |
| 0.197787095     | 0.229123624  | 3.028213134    | 1.69174216    | 0.180519924 |
| 0.021278204     | 2.115780077  | 0.028203955    | 1.083633395   | 0.019906816 |
| 0.106265142     | 1.442259154  | 1.448743587    | 1.393844869   | 2.053516586 |
| 0.10532419      | 0.119258558  | 0.148937253    | 2.457120963   | 0.097349365 |
| 1.597433124     | 1.585812258  | 0.69927497     | 2.589448131   | 0           |
| 2.557608699     | 2.293900266  | 3.427316182    | 0.980631276   | 0           |
| 0.045956536     | 1.194981307  | 0.062062386    | 0.038221433   | 0.042839183 |
| 1.881977265     | 1.895274799  | 1.266418936    | 0.051952901   | 0.058439296 |
| 3.974137096     | 2.488608934  | 0.039816501    | 3.148798562   | 0.027887212 |
| 1.824570412     | 1.566735229  | 5.696080353    | 0.973792694   | 0           |
| 0               | 2.806941638  | 1.584600054    | 1.584639939   | 0           |
| 1.013427724     | 0.540156489  | 2.910205058    | 1.945633746   | 0           |
| 2.46958842      | 0.759871095  | 2.627418874    | 0             | 0.766923779 |
| 1.917968247     | 1.298533863  | 1.300460337    | 0.058474156   | 0.06588659  |
| 0.189081874     | 3.244303221  | 1.79659855     | 0.149819076   | 0.172774196 |
| 0.092134146     | 0.10398212   | 2.841652299    | 0.075387163   | 0.085316611 |
| 0               | 2.540737391  | 0              | 0             | 0           |
| 0.061634793     | 4.160203746  | 0.084240019    | 0.050973962   | 0.057323487 |
| 1.068231701     | 2.08932896   | 0.021580127    | 1.064455299   | 0.015299277 |
| 0.073466226     | 1.945124616  | 0.101331674    | 1.901254434   | 0.068211183 |
| 1.81901598      | 1.828963175  | 0.066246409    | 1.188649165   | 0.045603403 |
| 1.369899277     | 0.10362794   | 0.128480926    | 0.075144092   | 0.085036192 |
| 3.044942542     | 0.049374978  | 2.246209504    | 0.036844511   | 0.041280977 |
| 1.509691874     | 1.916281184  | 0.936281337    | 1.51439348    | 0           |
| 0.926319671     | 1.494011875  | 0.92549854     | 1.50224146    | 0           |
| 4.582372864     | 2.138442531  | 1.489669221    | 0.094164445   | 0.10708222  |
| 0.135315016     | 3.009224148  | 0.195974316    | 0.109107892   | 0.124548495 |
| 1.335588435     | 0.093421385  | 0.115281658    | 0.068101866   | 0.076926742 |
| 0.86648497      | 0.863913288  | 0              | 1.433514022   | 0           |
| 2.010793511     | 2.011240339  | 1.008673027    | 1.594406479   | 1.008366918 |
| 1.844019345     | 2.474389541  | 0              | 1.18480098    | 0           |
| 1.778960287     | 2.215332766  | 6.199255687    | 0.033555866   | 0.037563853 |
| 0.016047612     | 2.677809572  | 0.021187627    | 0.013493171   | 0.015024971 |
| 1.045296085     | 1.046444946  | 0.014229048    | 1.042843553   | 0.010137753 |
| 0               | 2.00207277   | 6.000832833    | 0             | 4.677119916 |



|             |             |             |             |             |
|-------------|-------------|-------------|-------------|-------------|
| 1.451820944 | 1.438212283 | 3.465887394 | 0           | 0           |
| 0.867474169 | 0.864917303 | 0           | 0           | 1.428736403 |
| 0           | 1.598905955 | 1.594076275 | 0           | 0           |
| 0           | 0           | 0           | 1.199421939 | 0           |
| 3.469456384 | 1.112993493 | 1.112703981 | 1.704772743 | 0.024736361 |
| 0           | 1.382950124 | 0           | 0           | 0           |
| 1.581094086 | 2.332974982 | 0.687945089 | 1.21819125  | 0           |
| 1.619414182 | 3.041553387 | 0.009100669 | 1.617092104 | 0.006506481 |
| 1.555017778 | 0           | 0           | 0           | 0           |
| 0.049038252 | 1.829420884 | 6.182015512 | 0.040739241 | 0.04569136  |
| 1.18774116  | 0.050871134 | 0.061564958 | 1.787134669 | 0.042509559 |
| 0           | 2.302599754 | 0           | 0           | 0           |
| 0           | 2.783431432 | 4.060374947 | 0           | 0.983521211 |
| 1.058908877 | 0.574368965 | 0           | 0.59181284  | 0           |
| 0           | 1.9098273   | 0           | 2.238858822 | 0           |
| 0.042133314 | 0.046962446 | 0.056733986 | 0.035090112 | 0.039297207 |
| 0.140450253 | 3.032415613 | 2.281576252 | 0.113055492 | 0.129183815 |
| 1.006419241 | 2.330711447 | 2.008724411 | 2.329654296 | 2.007898104 |
| 0.234354199 | 1.940130881 | 6.157185237 | 0.183094437 | 0.212874622 |
| 3.210700816 | 2.626724249 | 1.622297628 | 1.618033879 | 0.006698585 |
| 1.810038877 | 1.855967677 | 0.327253575 | 0.166849725 | 0.193222358 |
| 0.011141053 | 2.061202819 | 0.014655653 | 2.054190121 | 0.010438689 |
| 0           | 3.326412169 | 0           | 0           | 0           |
| 0.067125711 | 1.282841403 | 0.092133605 | 1.255482821 | 0.062380955 |
| 0           | 1.906053235 | 9.49367321  | 2.235351773 | 0           |
| 0.857900334 | 2.122954533 | 0           | 0.86420475  | 0           |
| 3.517616479 | 1.763801711 | 0.047607191 | 0.029663909 | 0.03317302  |
| 0           | 2.781943043 | 0           | 1.565134229 | 0           |
| 0           | 1.827445872 | 0           | 0.877096409 | 0           |
| 0.051257368 | 1.840087239 | 0.069501477 | 0.042548885 | 0.047743622 |
| 0.158814145 | 0.1822215   | 0.234428438 | 1.568892489 | 2.255616265 |
| 1.429123096 | 4.041309085 | 5.84027243  | 0.087336124 | 0.099143698 |
| 1.193704354 | 1.185060229 | 1.185741841 | 0.693765266 | 0           |
| 0           | 0.742303845 | 0.746207468 | 0           | 0           |
| 0           | 0.954085149 | 2.340172485 | 0.521291698 | 2.558368302 |
| 0.023566086 | 1.704609705 | 0.031290256 | 1.692013491 | 0.022039792 |
| 0.96796273  | 1.957567695 | 0           | 1.549244859 | 0           |
| 3.006473308 | 2.81410812  | 4.095114206 | 0.000956158 | 0.001061161 |
| 0.050975172 | 1.838732617 | 0.069103935 | 2.828674412 | 0.047482717 |
| 0           | 0           | 0.885922767 | 0           | 0           |
| 0           | 1.70819709  | 0           | 1.337419247 | 0           |
| 0.966615485 | 0.965860954 | 0           | 2.281360509 | 0           |
| 0.051962941 | 3.758520623 | 1.220564187 | 0.04312367  | 0.04839587  |
| 1.909868869 | 1.965505002 | 3.599018977 | 0.187984519 | 0.218818401 |
| 3.964706063 | 2.123254332 | 0           | 2.144718956 | 0           |
| 0           | 0.916623607 | 1.483077404 | 1.493153396 | 0           |
| 2.809452949 | 0.861952083 | 0.863594824 | 0           | 0           |
| 1.880546149 | 0.41281207  | 1.64665835  | 1.487353319 | 0           |
| 0.019811009 | 1.084786509 | 0.026230308 | 0.01663437  | 0.018538205 |
| 2.341976453 | 0.004033383 | 4.725455354 | 1.014542454 | 0.003427128 |
| 1.689848458 | 2.708084941 | 4.728414336 | 0.017965162 | 0.020028367 |
| 2.521945135 | 2.509534868 | 4.119811396 | 1.353628823 | 0.801420333 |
| 0.641046601 | 2.887200102 | 0.64283574  | 0.653053238 | 3.782227951 |
| 4.125932743 | 3.025699069 | 2.784637774 | 0.066953872 | 0.075607502 |
| 1.57807678  | 1.070838635 | 0.766002755 | 1.392656243 | 0           |
| 2.511278943 | 1.717191653 | 0           | 3.180833605 | 0           |
| 0.671404786 | 1.170655011 | 0           | 0.682883251 | 0           |
| 0.912920121 | 1.477365304 | 0.912028928 | 1.89587236  | 0           |

|             |             |             |             |             |
|-------------|-------------|-------------|-------------|-------------|
| 1.190399587 | 3.435918835 | 0.062487854 | 0.038470319 | 0.043120956 |
| 1.467909458 | 1.747901588 | 0           | 1.119365058 | 0           |
| 0.085485415 | 2.000732235 | 3.686598405 | 2.379310699 | 0.079234587 |
| 0.467539146 | 0.899232303 | 0           | 1.285807977 | 0           |
| 3.309956624 | 2.639028731 | 6.082472961 | 3.085600348 | 4.47101679  |
| 1.114526218 | 0.030627003 | 0.036727628 | 1.107909845 | 0.025776432 |
| 0.018438942 | 0.020430909 | 2.431074227 | 2.413000458 | 0.017257794 |
| 0.544043842 | 0.539442835 | 0           | 0.557199931 | 0           |
| 0.286234962 | 2.133174647 | 2.212470391 | 0.220202081 | 0.258295582 |
| 0.077100399 | 1.962026975 | 4.288769338 | 0.063417295 | 0.071548183 |
| 5.24245978  | 1.686341389 | 0.026368825 | 1.675797634 | 0.018634376 |
| 1.291594112 | 2.976315425 | 6.218421697 | 0.059094595 | 0.066596425 |
| 2.680926124 | 1.674081087 | 2.425437713 | 0.014684793 | 0.01635704  |
| 0.164457666 | 1.672625722 | 1.692870158 | 0.131341965 | 0.150771142 |
| 0.013350203 | 2.0731848   | 0.017590713 | 2.388347351 | 3.532603553 |
| 0           | 0.971142119 | 0           | 0           | 0           |
| 2.905758595 | 0.069017105 | 1.899008618 | 2.281141145 | 0.05730951  |
| 0           | 1.7930022   | 0.639168216 | 0.649366695 | 0.641422835 |
| 0.983051438 | 0.982658764 | 6.219712059 | 0           | 0           |
| 1.291796795 | 5.163123702 | 1.3039239   | 0.059136035 | 0.066643843 |
| 1.429385856 | 1.446681917 | 1.453351674 | 2.031851075 | 0.0992066   |
| 0           | 3.484320196 | 0           | 1.40547774  | 0           |
| 0           | 1.20087111  | 4.276185073 | 1.227686149 | 0           |
| 0.579716461 | 2.643895305 | 0           | 0.592541755 | 0           |
| 0.121898957 | 2.947822447 | 7.233627111 | 1.44714123  | 0.112408472 |
| 3.018410477 | 1.855939274 | 1.450468588 | 1.870562851 | 0           |
| 0.084683086 | 1.354826373 | 0.117825482 | 0.069469933 | 0.078499884 |
| 1.857589303 | 1.242717018 | 0.078229393 | 1.836350566 | 0.053438383 |
| 0.015519396 | 1.664227893 | 0.020482125 | 2.075046696 | 0.014531554 |
| 0.008951015 | 2.373021388 | 0.011755515 | 1.035492515 | 0.008389451 |
| 2.177304465 | 1.607755179 | 0.71432042  | 1.251330363 | 0           |
| 0           | 4.203440402 | 0           | 1.496679991 | 0           |
| 0           | 0.964887751 | 1.542155254 | 2.280193033 | 0           |
| 0.023086209 | 5.227157109 | 4.909776054 | 2.110530934 | 0.021592525 |
| 0           | 0.978974002 | 0.979141424 | 0           | 0           |
| 1.349491087 | 0.09754163  | 6.782158733 | 0.070953496 | 0.080207062 |
| 0.073351518 | 1.944589844 | 2.401345122 | 2.658746343 | 3.829099829 |
| 0.009000117 | 3.053750814 | 0.011820433 | 0.007587311 | 0.00843541  |
| 2.341696762 | 1.927754184 | 0.573291846 | 0           | 0           |
| 1.131465475 | 2.430291657 | 2.02122162  | 0           | 3.153645407 |
| 0.025973888 | 0.028834175 | 0.034549791 | 1.101749558 | 1.708279803 |
| 5.701896426 | 2.629252807 | 3.194386927 | 2.43269727  | 2.05527339  |
| 1.252795592 | 1.261177649 | 1.262351646 | 1.236371568 | 0.057548956 |
| 2.326505177 | 2.139108642 | 0.913169233 | 0           | 0           |
| 1.275202841 | 1.284570368 | 0.092739334 | 0.055745093 | 0.062766973 |
| 1.158995773 | 0.042859453 | 2.214769393 | 1.149440755 | 0.035915733 |
| 1.01645726  | 1.01685779  | 2.022355999 | 1.015591068 | 4.976097739 |
| 1.469640422 | 1.466115188 | 0           | 0           | 0           |
| 0.678062333 | 0.673690708 | 3.263450865 | 0.689413722 | 0.681966688 |
| 1.284416065 | 1.971030008 | 4.48380826  | 0           | 0           |
| 0           | 0.873243667 | 0.880774118 | 0           | 0           |
| 2.216981097 | 1.798366102 | 2.237217786 | 1.164989249 | 2.210067271 |
| 0.948216748 | 1.931249544 | 0           | 1.938559609 | 0           |
| 0           | 0           | 0           | 0.980157136 | 0           |
| 0           | 2.437957626 | 2.431656683 | 1.87625213  | 5.105935502 |
| 0.701526636 | 2.142627634 | 0.702168188 | 0.712397318 | 0.705279886 |
| 1.127209387 | 1.73990792  | 0.040951571 | 0.025656022 | 4.624023626 |
| 1.351339166 | 2.049988913 | 0           | 0           | 2.066759911 |

| hsa-miR-6516-5p | hsa-miR-5589-5p | hsa-miR-493-5p | hsa-miR-92b-3p | hsa-miR-371a-5p |
|-----------------|-----------------|----------------|----------------|-----------------|
| 2.976188789     | 2.439395782     | 4.902525814    | 7.341462685    | 0.102750057     |
| 1.211101059     | 1.225035468     | 1.854725393    | 5.517902807    | 0.066560342     |
| 0.0238165       | 2.474362321     | 5.384177596    | 6.284594797    | 1.719731526     |
| 0.012490009     | 5.484890532     | 4.413032337    | 5.485146844    | 0.016652493     |
| 0.079095978     | 1.367752626     | 6.933684916    | 6.707626577    | 0.111203888     |
| 2.776890406     | 6.108366099     | 3.036306556    | 2.809479064    | 0.046651893     |
| 2.521123394     | 6.000720159     | 3.474493288    | 4.008930581    | 0.149587546     |
| 1.065958956     | 5.838629727     | 5.468240697    | 6.68147919     | 0.019946885     |
| 0               | 5.307641853     | 5.553186964    | 6.289535218    | 0               |
| 1.749880749     | 0.047255713     | 2.19659502     | 5.445343993    | 0.043904659     |
| 0               | 0               | 1.945120632    | 9.395773179    | 0               |
| 3.018755049     | 5.466453039     | 5.906332813    | 6.981344907    | 0.209578462     |
| 1.314214887     | 3.952366643     | 4.591375863    | 5.153776365    | 0.102157255     |
| 2.976789574     | 0               | 5.901199449    | 6.462223219    | 0               |
| 2.16218807      | 0.195830489     | 3.347774529    | 6.742764338    | 0.177848521     |
| 1.128002672     | 1.135128472     | 4.457060709    | 4.207630961    | 0.039398239     |
| 0.572112232     | 0               | 6.679846795    | 7.547981022    | 0.562308667     |
| 0               | 3.571729389     | 6.734069599    | 6.289105992    | 0               |
| 1.855601754     | 4.702800588     | 5.292658171    | 6.519278189    | 0.074717191     |
| 1.633763501     | 7.879812171     | 3.967756434    | 5.003621888    | 0.227712712     |
| 0.113515154     | 4.665499681     | 3.732296714    | 4.667022187    | 0.16413767      |
| 1.726899646     | 3.907318342     | 3.025493255    | 3.02591175     | 0.269239642     |
| 2.106703287     | 5.001217681     | 1.69482463     | 3.723355145    | 0.026265198     |
| 0.096374737     | 5.707832308     | 2.570070778    | 5.36336283     | 0.137411817     |
| 1.407012402     | 5.044610428     | 4.553377032    | 6.020154921    | 1.449867041     |
| 2.572036531     | 11.39760122     | 5.083099633    | 3.804702729    | 0               |
| 2.296101218     | 0               | 3.667972615    | 5.580777968    | 0               |
| 1.18379873      | 5.208787985     | 4.46809105     | 5.209565583    | 0.057491289     |
| 0.057430068     | 1.905185794     | 4.571613267    | 5.731481614    | 0.079346806     |
| 0.027435813     | 7.505755712     | 3.186249828    | 5.199998427    | 0.037012172     |
| 2.677708641     | 0.945924872     | 6.447530124    | 7.073194616    | 0               |
| 0.999715956     | 6.08698059      | 3.584503411    | 5.727437884    | 0               |
| 0               | 0               | 4.96650342     | 7.159906521    | 0               |
| 1.303594609     | 5.318002434     | 5.01691907     | 6.861509108    | 0               |
| 1.279589034     | 4.026606676     | 4.912742073    | 5.918976744    | 0.089960274     |
| 0.169122614     | 3.625688789     | 0.289944161    | 4.24590119     | 0.2561205       |
| 1.358724876     | 0.128842609     | 9.504413506    | 6.045660496    | 0.11821203      |
| 1.371050849     | 0.817995895     | 9.066900122    | 2.313815794    | 0               |
| 1.865663292     | 6.829402049     | 2.338097137    | 3.844129704    | 0.077766717     |
| 1.662780673     | 4.015042215     | 4.968809244    | 6.360312781    | 0.020117567     |
| 3.951744782     | 0.101258185     | 3.443116557    | 5.329604979    | 0.093297321     |
| 2.565564768     | 3.628639657     | 4.710745028    | 4.565241927    | 0.061327163     |
| 1.991676615     | 3.34788423      | 4.265842817    | 5.334638005    | 0.117798433     |
| 1.177245557     | 4.610281017     | 6.581204734    | 6.803769525    | 0.055335892     |
| 1.511862198     | 2.712064768     | 10.25632145    | 6.537609388    | 0               |
| 0.927901631     | 3.582214879     | 4.049605868    | 4.831598596    | 0               |
| 0.10505292      | 4.879824872     | 4.402816348    | 5.851782901    | 0.150851045     |
| 2.162129645     | 4.11881987      | 3.066627679    | 4.618983922    | 0.177826695     |
| 0.075548605     | 7.566221547     | 3.297905965    | 4.519194674    | 0.105912334     |
| 2.148599681     | 2.12916888      | 9.956612212    | 6.19810266     | 0               |
| 1.008326278     | 6.163870187     | 5.657977011    | 6.336114315    | 0.00247779      |
| 0.66536256      | 1.525875521     | 3.733732046    | 7.311736548    | 0               |
| 2.524520129     | 6.126302838     | 4.066952693    | 6.335779393    | 1.173803253     |
| 0.014788712     | 6.109848651     | 6.358363474    | 5.601630175    | 0.019752883     |
| 2.054950038     | 5.24390757      | 3.771890121    | 4.828562369    | 0.013280002     |
| 2.023102513     | 3.791838336     | 10.1907661     | 4.422478525    | 8.34400132      |

|             |             |             |             |             |
|-------------|-------------|-------------|-------------|-------------|
| 1.464663228 | 4.971653385 | 5.93613675  | 6.823462133 | 0.593286274 |
| 1.429592216 | 4.363966688 | 3.111850012 | 2.387772323 | 0           |
| 0.712385286 | 5.158742158 | 1.893914381 | 9.428399341 | 0           |
| 2.981835089 | 0           | 8.514941932 | 3.525948334 | 0           |
| 1.107054737 | 6.223490541 | 4.344816367 | 5.084570611 | 0.032753917 |
| 0           | 5.788057964 | 4.768911212 | 6.274938826 | 0           |
| 0.691910551 | 5.227832609 | 4.734429512 | 6.610301076 | 0           |
| 1.618333169 | 4.570731233 | 4.294833755 | 5.047659609 | 0.008500517 |
| 2.290053374 | 2.285959589 | 5.128270608 | 8.270588089 | 0           |
| 3.056904583 | 6.494334332 | 4.964524333 | 7.435361631 | 0.061449478 |
| 1.795861547 | 6.989704512 | 4.200503296 | 5.587305292 | 0.057034919 |
| 1.982728742 | 4.225106332 | 6.43588927  | 5.106021426 | 0           |
| 2.300696317 | 5.181746761 | 3.879965903 | 5.43157738  | 0           |
| 1.980363279 | 4.758075589 | 5.764652611 | 5.992753906 | 0           |
| 0           | 3.476870699 | 4.794305594 | 5.55868836  | 0           |
| 0.038645128 | 6.835636565 | 3.260263808 | 3.063970188 | 0.052599012 |
| 0.126639296 | 4.417493686 | 4.28938168  | 4.748969067 | 0.185105865 |
| 0.00141041  | 3.331922423 | 3.469491569 | 7.385760126 | 0.001864217 |
| 0.208102356 | 4.296525871 | 3.564564663 | 3.564875582 | 0.325751196 |
| 1.029242056 | 0.009365511 | 5.093490551 | 5.178433453 | 0.008752728 |
| 0.189011241 | 0.326910144 | 4.667481465 | 5.940161493 | 0.291092941 |
| 2.380135624 | 4.322820422 | 2.653108403 | 4.397042385 | 0.013677237 |
| 2.099475471 | 2.075738255 | 3.719580514 | 4.41404693  | 0           |
| 1.889092259 | 8.471058129 | 4.676251283 | 5.522095598 | 0.084949588 |
| 1.502922094 | 1.903618584 | 3.34763559  | 7.756862943 | 8.981604104 |
| 1.418137146 | 4.086105413 | 5.688248129 | 6.800494332 | 0           |
| 1.750931964 | 3.813012745 | 6.824787962 | 6.305241569 | 0.044200316 |
| 0.982581553 | 4.614685276 | 6.05770702  | 5.69825448  | 0           |
| 0           | 2.136203784 | 6.507817221 | 5.104354478 | 0           |
| 1.204360677 | 2.889682519 | 3.314337869 | 4.654146062 | 0.064307925 |
| 1.595818141 | 7.150641417 | 5.117599146 | 5.913130785 | 0.211475504 |
| 1.414166866 | 3.632999397 | 2.920658754 | 5.528312407 | 0.138822982 |
| 1.585666116 | 7.025315282 | 3.459866635 | 5.791380483 | 0           |
| 2.645027046 | 7.47887309  | 2.763970749 | 4.15083487  | 0           |
| 0.513578184 | 0           | 0.962306647 | 5.432395556 | 0.504211857 |
| 2.443050875 | 3.31966138  | 3.472836993 | 5.444948443 | 0.029125265 |
| 0           | 2.537678805 | 5.75386287  | 6.438138058 | 0           |
| 1.004644909 | 2.328713758 | 6.347771248 | 8.475561963 | 0.001380857 |
| 0.046681036 | 2.282426825 | 4.233546499 | 4.652401675 | 0.063944046 |
| 0           | 3.278962118 | 2.417087305 | 3.902022381 | 0           |
| 3.021313018 | 0           | 5.626930423 | 6.406560864 | 0           |
| 0           | 7.153565462 | 4.337802073 | 5.403878326 | 0           |
| 1.8238111   | 3.318897668 | 4.797070692 | 5.294727992 | 0.065218215 |
| 0.213871988 | 5.171858166 | 5.777707492 | 5.549883648 | 0.336440888 |
| 1.418387776 | 9.28445044  | 2.373686898 | 1.806114531 | 0           |
| 1.489912587 | 3.569241003 | 4.114069751 | 6.629839249 | 0           |
| 0.867246394 | 2.126341793 | 5.769043876 | 6.917514718 | 0           |
| 1.465071528 | 3.23656618  | 6.225511577 | 6.592698184 | 0           |
| 1.080469025 | 2.705605456 | 4.777194332 | 8.575170568 | 0.024434774 |
| 0.003374677 | 5.025132683 | 3.831770061 | 6.697971258 | 1.015884167 |
| 0.019709823 | 2.448391951 | 7.01719923  | 6.992256996 | 0.026427942 |
| 2.056081871 | 4.563930877 | 4.86423132  | 6.444371287 | 0           |
| 1.149306755 | 6.752378207 | 5.619720461 | 6.625768448 | 1.787793024 |
| 0.07425646  | 7.454886438 | 4.908039622 | 4.836817646 | 0.103992295 |
| 0.774627107 | 2.052585625 | 6.740406661 | 5.740055089 | 0           |
| 0           | 4.730684351 | 6.295281645 | 6.930940469 | 0           |
| 0.676386692 | 4.23234536  | 5.903517384 | 7.374540198 | 0           |
| 0           | 5.875732939 | 2.865965272 | 4.02740144  | 0.910473558 |

|             |             |             |             |             |
|-------------|-------------|-------------|-------------|-------------|
| 2.552971309 | 2.257010139 | 4.887915123 | 8.543218512 | 1.199473394 |
| 2.02826031  | 3.703980568 | 6.98365193  | 6.578843006 | 0           |
| 0.077808765 | 0.118926949 | 2.463143032 | 4.533912408 | 2.01652966  |
| 1.997850615 | 2.52994903  | 5.214373742 | 5.838879342 | 0           |
| 1.231850806 | 6.611708182 | 2.657139219 | 6.02707979  | 0.073550347 |
| 0.025361148 | 2.75186231  | 6.1412813   | 7.106697551 | 0.034157348 |
| 1.672581666 | 4.767913665 | 4.982756009 | 4.292784724 | 0.022725642 |
| 1.385138624 | 2.679847474 | 3.703451914 | 5.344129661 | 0           |
| 0.252141828 | 5.288773535 | 5.936608447 | 3.454773416 | 0.409973001 |
| 0.070279777 | 3.035262101 | 3.46383677  | 4.735797766 | 0.098107973 |
| 0.018338938 | 5.264027048 | 4.302413001 | 3.296749957 | 0.024563276 |
| 1.908469558 | 6.321607394 | 5.368343167 | 5.672545258 | 0.090978046 |
| 1.668078462 | 4.203632959 | 5.07275016  | 9.349453639 | 0.021525213 |
| 0.147693202 | 5.224076952 | 5.570259584 | 6.120576306 | 0.219687018 |
| 1.648732456 | 7.95626556  | 3.408239201 | 5.135487864 | 0.016408793 |
| 2.286152549 | 4.202106086 | 2.543455393 | 4.477375794 | 0           |
| 0.056322067 | 0.084159284 | 4.08889264  | 5.759708901 | 0.077746941 |
| 1.823010162 | 4.675389111 | 6.261761234 | 5.516031296 | 0           |
| 0.983440327 | 6.016216958 | 5.059469785 | 6.713096266 | 0           |
| 0.065473778 | 1.304043792 | 1.947430617 | 3.004773094 | 0.091046073 |
| 1.414417457 | 3.965664402 | 5.802377903 | 5.578046475 | 0.138917725 |
| 1.388818918 | 3.768155794 | 7.56526897  | 5.480502969 | 0           |
| 0           | 2.955227355 | 4.888656781 | 6.374562688 | 0           |
| 2.378946221 | 0           | 6.258361218 | 6.816090932 | 0           |
| 0.110257911 | 4.316165438 | 4.317062916 | 4.914501463 | 0.159002009 |
| 0           | 4.94870008  | 6.276178594 | 7.250809377 | 0           |
| 2.395440385 | 3.837867946 | 2.800371526 | 8.054239578 | 0.108206854 |
| 1.228114637 | 5.072482169 | 1.87668318  | 5.868547901 | 0.072285443 |
| 1.063198583 | 5.629506247 | 5.532438746 | 6.013495129 | 0.019097267 |
| 0.008259544 | 3.518027702 | 6.365895656 | 7.375192388 | 0.010975709 |
| 2.595719994 | 3.327744128 | 4.924816203 | 9.06030385  | 0           |
| 0.923108271 | 4.330068016 | 4.041520231 | 4.263064796 | 0           |
| 0           | 2.755563345 | 3.116764993 | 4.031884253 | 0           |
| 0.02124789  | 4.475464416 | 1.704056088 | 4.401360743 | 0.028524789 |
| 1.974765297 | 5.63832245  | 3.873906816 | 4.773552708 | 0           |
| 0.078761039 | 5.301993945 | 4.712479771 | 5.680722479 | 0.110702984 |
| 0.06690659  | 5.641131715 | 4.267139227 | 5.642740691 | 0.093145788 |
| 2.3690854   | 3.867161736 | 2.863684138 | 4.147871559 | 0.011036209 |
| 1.965526058 | 2.728813446 | 6.75747507  | 6.087748286 | 0           |
| 0           | 4.211100359 | 3.942301646 | 6.413450991 | 0           |
| 2.455010704 | 6.944535582 | 1.109954661 | 7.03516668  | 0.03214287  |
| 0.965995034 | 0           | 6.893710868 | 7.811653425 | 4.416883824 |
| 0.056556904 | 2.340741097 | 5.572963415 | 6.382965596 | 0.078085792 |
| 0.478573672 | 5.045518886 | 5.78771755  | 6.902015442 | 0           |
| 1.890872342 | 3.738853342 | 4.333669088 | 4.89226924  | 0.085500053 |
| 0.035324086 | 4.055787196 | 4.89806634  | 6.23539697  | 0.047952273 |
| 1.016065222 | 1.016754033 | 5.196993623 | 6.177062186 | 1.605616424 |
| 0.905888249 | 3.843374229 | 4.163642784 | 5.36168192  | 0           |
| 0.682993544 | 4.294957759 | 5.534760619 | 5.900522393 | 0           |
| 1.291530706 | 6.213447791 | 5.926444255 | 6.84335344  | 0           |
| 0.893427677 | 5.821828951 | 2.912195377 | 5.478436279 | 0.445598437 |
| 0.039083823 | 6.090584614 | 2.569098882 | 5.281954063 | 1.183874695 |
| 0.949357923 | 5.668426951 | 7.420353727 | 6.082947924 | 0           |
| 1.974334244 | 0           | 1.971666148 | 4.136072881 | 0           |
| 0.899019416 | 4.078363094 | 5.31799625  | 5.112021152 | 0           |
| 0           | 0.702066496 | 4.433765368 | 9.616422701 | 0           |
| 1.123805374 | 5.961244144 | 2.995855611 | 4.200900495 | 0.038060544 |
| 2.735506125 | 2.698517011 | 5.449715482 | 7.157303421 | 0           |

| hsa-miR-3680-3p | hsa-miR-577 | hsa-miR-34b-5p | hsa-miR-203b-3p | hsa-miR-6788-3p |
|-----------------|-------------|----------------|-----------------|-----------------|
| 1.303148648     | 0.096480901 | 0.07616539     | 1.344176598     | 0.08141396      |
| 0.043691241     | 0.062767426 | 0.050240987    | 3.651494444     | 1.838530593     |
| 0.021559368     | 4.620526232 | 1.708750926    | 0.033700291     | 0.026124681     |
| 0.011334009     | 0.015797387 | 0.01289771     | 0.017485051     | 1.652032689     |
| 0.070773442     | 4.409055553 | 0.082089312    | 4.787273298     | 0.087817261     |
| 1.145246234     | 0.044097796 | 0.035573551    | 1.16082454      | 0.037812601     |
| 0.092799254     | 0.13969094  | 1.448889195    | 0.159545317     | 0.116366509     |
| 1.658995841     | 0.018915136 | 0.015422581    | 0.020952222     | 2.897921275     |
| 1.915613843     | 1.496259119 | 0.929894604    | 2.699756815     | 0.928840256     |
| 2.756885478     | 4.386435443 | 0.033526086    | 0.046247096     | 0.03562613      |
| 0               | 4.53743119  | 0.590201567    | 0               | 2.369338745     |
| 0.125141787     | 0.194354697 | 0.147644307    | 0.225133188     | 1.618467264     |
| 1.301566        | 1.340967748 | 0.075748156    | 0.108347693     | 2.995788607     |
| 0.983216851     | 0           | 1.564269137    | 9.811586682     | 0.982242594     |
| 1.49068187      | 0.16553653  | 1.522220878    | 0.190326083     | 0.136856749     |
| 0.026370385     | 0.037273514 | 0.030155003    | 2.178459266     | 2.981217516     |
| 1.982375747     | 1.386141484 | 3.645230668    | 1.032406449     | 0.566053882     |
| 0.3752835       | 0.357287015 | 0              | 2.804771849     | 0.759808966     |
| 0.048764352     | 1.8840034   | 0.056165844    | 0.078988978     | 1.243279291     |
| 0.134461323     | 1.708998626 | 0.159096195    | 0.245145133     | 3.382360512     |
| 2.097058566     | 1.528767534 | 2.573552921    | 0.175366903     | 2.59367716      |
| 0.155071512     | 0.247978773 | 0.18464249     | 0.291302043     | 2.434515135     |
| 1.083454662     | 2.118039162 | 1.687154509    | 0.027609391     | 1.68958437      |
| 0.085931411     | 0.128503547 | 1.416307876    | 0.146347564     | 0.107401874     |
| 0.085198732     | 0.127318517 | 2.053763135    | 0.144954        | 2.068113925     |
| 1.233143374     | 0.693328566 | 0              | 0               | 1.596338904     |
| 1.562314072     | 1.972552602 | 0              | 0               | 0.979550112     |
| 2.805467537     | 0.054273642 | 0.043596151    | 0.060655261     | 1.189727786     |
| 1.857741933     | 0.074711879 | 1.251983213    | 0.083929004     | 3.922206136     |
| 0.024816382     | 0.035026107 | 1.121845593    | 0.038955382     | 2.481288358     |
| 0.511705714     | 0.937491883 | 2.388080765    | 3.781764623     | 0.497207498     |
| 0               | 0           | 0.999713181    | 5.882166481     | 4.087056197     |
| 0               | 1.000673688 | 4.035610861    | 0.544990587     | 2.972776717     |
| 1.312461825     | 0           | 2.666183798    | 0.761254205     | 1.687294097     |
| 0.058092393     | 0.084599081 | 1.910254418    | 0.095274439     | 0.071644887     |
| 1.662694388     | 4.158205314 | 2.373033947    | 1.802638706     | 0.191414125     |
| 0.074878204     | 2.483981993 | 0.086963456    | 0.125613382     | 2.011958071     |
| 1.378165513     | 0           | 1.368781861    | 0               | 3.90356457      |
| 2.608217021     | 0.073237796 | 1.869972654    | 0.082242367     | 1.252611501     |
| 0.013657216     | 0.019076599 | 0.015553156    | 9.079399505     | 2.410582788     |
| 2.329480376     | 0.087702673 | 0.069483266    | 0.098847495     | 1.930549752     |
| 2.226082015     | 0.057868428 | 0.046414105    | 0.064731403     | 3.588197943     |
| 2.403221045     | 0.110415385 | 0.086676716    | 0.125167766     | 3.796226266     |
| 0.036614617     | 3.851059655 | 0.042007912    | 3.445272548     | 1.182925146     |
| 0.940194383     | 0.93524418  | 1.51098904     | 0               | 3.081950719     |
| 0.929980315     | 2.698872843 | 0              | 0               | 1.49652486      |
| 3.683993422     | 3.639348538 | 1.452235329    | 1.493992651     | 2.112898282     |
| 1.490630822     | 0.165516634 | 0.127136723    | 0.190302231     | 0.136841092     |
| 0.067648593     | 1.352719444 | 0.078387032    | 3.297169602     | 1.336725303     |
| 0               | 0.863161326 | 0              | 2.96019702      | 0.866222961     |
| 1.008066206     | 0.002354563 | 0.001933534    | 0.002597363     | 1.595109716     |
| 1.185526498     | 0           | 0.663244657    | 0               | 1.164253667     |
| 0.033347983     | 2.549785612 | 0.038219903    | 0.052932417     | 3.025583715     |
| 2.077326983     | 1.069373325 | 1.066014015    | 0.020747971     | 1.664234815     |
| 0.009061372     | 0.012603174 | 0.010303922    | 0.01393845      | 0.010913939     |
| 1.325857705     | 3.229272393 | 0.777146572    | 2.244247069     | 0.774435267     |

|             |             |             |             |             |
|-------------|-------------|-------------|-------------|-------------|
| 1.106149841 | 0           | 1.756365443 | 0.597088814 | 0           |
| 1.84029163  | 0           | 0.869030362 | 0           | 2.143176692 |
| 0.718850949 | 0           | 0           | 0           | 0           |
| 1.200129976 | 2.088267335 | 0           | 3.149223898 | 0.67150489  |
| 0.022029656 | 3.970469161 | 0.025155997 | 0.034456363 | 2.137609556 |
| 1.400043133 | 0           | 0           | 4.428783769 | 3.087890238 |
| 0.698655102 | 0.681742133 | 0.689881833 | 1.562108569 | 1.883108885 |
| 1.027501737 | 0.008071914 | 1.02869243  | 0.008917006 | 1.02918005  |
| 0.976160191 | 0.974082959 | 0           | 1.553398497 | 0           |
| 2.22649455  | 0.057983001 | 1.198103376 | 1.210180958 | 1.202160462 |
| 0.037693016 | 0.053845738 | 0.043260157 | 0.06017055  | 4.421207741 |
| 0           | 2.786820846 | 0           | 1.567293847 | 0           |
| 0           | 5.465962726 | 3.147443038 | 0           | 2.299784425 |
| 0           | 2.141891586 | 0           | 0           | 2.355375848 |
| 1.509114223 | 0           | 0           | 0           | 0           |
| 3.666141276 | 1.180917848 | 0.039986179 | 0.055461872 | 1.17425398  |
| 0.112237507 | 0.172146436 | 1.54055681  | 2.745238304 | 1.555587896 |
| 1.006072622 | 1.592950433 | 1.006329701 | 0.00195404  | 0.00153945  |
| 0.181612987 | 1.966147587 | 0.217982783 | 1.995146051 | 1.891398596 |
| 0.005992534 | 0.008311156 | 0.006807474 | 2.852233087 | 3.848835762 |
| 0.165531967 | 0.267440242 | 1.787938481 | 0.315778438 | 2.487571233 |
| 1.044016269 | 1.048225068 | 0.010609914 | 0.014356048 | 3.38570975  |
| 1.391424517 | 3.639478949 | 0           | 0           | 0.829787945 |
| 1.254857198 | 1.286457538 | 0.063530337 | 0.089914653 | 2.334901914 |
| 0           | 5.747710142 | 0           | 1.496309418 | 1.909194513 |
| 0           | 1.406742721 | 0           | 0           | 1.413107184 |
| 0.029481701 | 0.041792656 | 0.033746711 | 0.046560142 | 1.757504526 |
| 0.983112212 | 1.976024193 | 0           | 0           | 1.563691617 |
| 0           | 1.423671057 | 1.836551974 | 0           | 3.138267316 |
| 0.042280132 | 0.060659588 | 0.048596331 | 0.067901408 | 1.211091102 |
| 0.126126194 | 2.798748357 | 0.148851004 | 0.227222585 | 1.623255788 |
| 1.396318151 | 0.129801787 | 0.101109425 | 1.457109644 | 2.515513967 |
| 0.69420017  | 0           | 0.685352476 | 0           | 2.341898809 |
| 1.685164841 | 2.206237933 | 0           | 0.743909933 | 0.745831601 |
| 2.72770799  | 0           | 8.061563499 | 2.181680443 | 0.962892095 |
| 1.092276157 | 0.027588416 | 0.022411354 | 0.030626085 | 1.700599183 |
| 0           | 0.967003941 | 0.968389765 | 3.534309008 | 1.546679244 |
| 0.000950662 | 1.004908232 | 1.004690537 | 3.007247262 | 2.328178442 |
| 1.809033087 | 0.060318961 | 0.048330286 | 0.067514308 | 2.587669296 |
| 0.892265782 | 6.576464894 | 0           | 0           | 0.886656608 |
| 0.793979916 | 0           | 1.722231519 | 1.701818402 | 0           |
| 0           | 0           | 0           | 0           | 2.277752921 |
| 0.042850954 | 1.222576728 | 1.209584068 | 0.068869933 | 0.052461451 |
| 0.186452683 | 0.307521993 | 0.224115237 | 0.366986378 | 0.244322105 |
| 0           | 0.854633912 | 0           | 0           | 0.857834397 |
| 1.493365084 | 5.515976874 | 1.488797189 | 0           | 1.486856889 |
| 0           | 0.861193269 | 1.827767233 | 0           | 2.139128851 |
| 1.207300086 | 0.827360843 | 1.181395673 | 0.419870822 | 1.171237259 |
| 1.675103914 | 0.02315843  | 3.277913796 | 0.025679787 | 0.019987913 |
| 1.601900395 | 1.01584683  | 0.003482395 | 7.913896157 | 2.019480247 |
| 0.017857676 | 1.092418188 | 0.02036444  | 7.578895367 | 2.43737394  |
| 1.354110827 | 1.33132176  | 0.800655769 | 1.331020822 | 1.735043155 |
| 0           | 1.127997598 | 1.145578561 | 0           | 1.513886662 |
| 0.066509251 | 0.09763305  | 0.077038936 | 2.784660598 | 2.401147392 |
| 0           | 0           | 1.362170558 | 1.069968615 | 1.08368922  |
| 0           | 0           | 0           | 0           | 0.790985629 |
| 1.199413825 | 1.167632534 | 1.184556209 | 1.168592113 | 0.670930537 |
| 0.917183845 | 5.255836998 | 0           | 0           | 1.887693455 |

|             |             |             |             |             |
|-------------|-------------|-------------|-------------|-------------|
| 0.038229438 | 0.054639555 | 1.187166888 | 7.493093046 | 2.56435922  |
| 0           | 0           | 1.103624664 | 0.607835125 | 1.762878821 |
| 4.095048444 | 6.330700178 | 0.080745668 | 0.115999915 | 0.086363993 |
| 0.93389214  | 7.015291772 | 0.470813752 | 1.23442807  | 0.907963958 |
| 2.266643455 | 4.046868318 | 3.471894268 | 1.249997549 | 1.863080039 |
| 0.022950009 | 0.032335503 | 1.112726097 | 6.769387538 | 1.719807357 |
| 1.072466678 | 1.680370023 | 0.017545501 | 0.023878793 | 0.018603068 |
| 0           | 0           | 0           | 1.63238732  | 1.011481006 |
| 0.218325835 | 0.371664329 | 0.264903848 | 0.451240504 | 2.067169017 |
| 0.062999114 | 0.092172493 | 0.072891651 | 0.104003326 | 0.077879672 |
| 0.016620532 | 3.12051269  | 0.018946039 | 1.689005992 | 1.083221768 |
| 0.058708296 | 1.943978402 | 1.9135691   | 0.096363894 | 1.292541015 |
| 2.084040734 | 1.075511336 | 0.016629152 | 5.872816406 | 2.091757085 |
| 0.130361586 | 2.369079322 | 0.15405074  | 1.698466732 | 2.307462756 |
| 0.011170167 | 1.057753691 | 0.012710587 | 0.017228675 | 2.394616836 |
| 0.973255673 | 0           | 0           | 0           | 1.963950827 |
| 2.608152156 | 0.073219343 | 0.058354254 | 0.082221261 | 0.062222976 |
| 0.649836919 | 2.031811071 | 0.640328115 | 0           | 2.056013341 |
| 0           | 2.298194815 | 0           | 2.297651171 | 0.983012493 |
| 0.058749432 | 1.305895011 | 1.286346579 | 0.096436722 | 0.072478092 |
| 0.086786695 | 2.896675093 | 1.420370944 | 0.147977812 | 1.430970014 |
| 0.560155322 | 0.541184239 | 0           | 0.546697061 | 2.740965811 |
| 1.228358461 | 1.575569433 | 0           | 0           | 0.694251149 |
| 0           | 0           | 0           | 0.579325655 | 1.717109856 |
| 0.098036592 | 6.006363659 | 2.120126017 | 3.884310276 | 1.486154035 |
| 0.897411555 | 1.450097061 | 0.893562198 | 1.449548627 | 0           |
| 1.944334092 | 0.101539462 | 1.335576285 | 1.361493494 | 1.97974342  |
| 0.047257972 | 0.068119984 | 2.609909444 | 0.076396339 | 1.858664134 |
| 0.01297438  | 1.06709922  | 0.014772255 | 1.06683987  | 1.661661786 |
| 1.626202492 | 1.0387679   | 0.008526385 | 8.826074578 | 2.370925507 |
| 2.206382415 | 0           | 0.71658127  | 0           | 2.175922261 |
| 0.925314151 | 0.919264935 | 0           | 0           | 2.890517296 |
| 0.967441348 | 0           | 0           | 1.953024712 | 1.543920828 |
| 2.699403344 | 0.027021568 | 0.021956168 | 0.029992558 | 0.023293928 |
| 0           | 0           | 0           | 0           | 4.058578881 |
| 1.951555847 | 2.014603341 | 0.081739665 | 0.117529821 | 0.087439038 |
| 0.060017255 | 0.087561793 | 0.069375641 | 0.098685184 | 1.930042242 |
| 0.007542999 | 1.038980053 | 0.00857311  | 0.011580367 | 1.037805697 |
| 0           | 0           | 0           | 0.569675881 | 2.155756482 |
| 1.152784111 | 0.628870954 | 1.136885011 | 0           | 0.633821133 |
| 1.101528723 | 0.030435801 | 0.024694535 | 0.033811135 | 0.026209144 |
| 0.515744091 | 4.025580015 | 3.11246491  | 5.071942009 | 0.501265129 |
| 1.235800813 | 0.073535508 | 0.058598597 | 8.98401776  | 2.908641934 |
| 0           | 0.903804271 | 0.476148224 | 4.187716027 | 0           |
| 0.055383166 | 0.08044708  | 0.063924399 | 2.708740441 | 1.276082189 |
| 1.14910338  | 1.781559012 | 0.036540694 | 0.050534652 | 1.15944582  |
| 0.003289969 | 2.608468277 | 4.022116285 | 1.016905964 | 2.020882686 |
| 0.908539793 | 0.901313197 | 1.878670629 | 0           | 0.903681241 |
| 1.207710043 | 0           | 0.680933488 | 2.090647844 | 0.677592322 |
| 0           | 0.749035229 | 1.68018628  | 0           | 1.981994694 |
| 2.336475639 | 6.709503281 | 1.231890325 | 0           | 0.448055001 |
| 0.035264575 | 3.841564729 | 0.040441441 | 1.182806761 | 2.217905296 |
| 0.950850453 | 0.946719253 | 1.524217973 | 0           | 1.522953783 |
| 0.98019575  | 5.177203679 | 0           | 0           | 1.560014546 |
| 0           | 0.894165205 | 0           | 0.894966077 | 2.183652536 |
| 1.23677439  | 2.534524512 | 2.886875904 | 1.207315498 | 2.156923337 |
| 0.025499829 | 1.742443007 | 0.029151312 | 0.040063718 | 1.12755697  |
| 0.815794134 | 2.51772863  | 1.75244204  | 0           | 1.350739106 |



| hsa-miR-892a | hsa-miR-524-3p | hsa-miR-376b-5p | hsa-miR-517b-3p | hsa-miR-517a-3p |
|--------------|----------------|-----------------|-----------------|-----------------|
| 0.072719564  | 0.071481851    | 2.412001939     | 0.111861865     | 0.111861619     |
| 0.048080373  | 0.047301738    | 1.223044312     | 0.072012585     | 0.072012439     |
| 0.023612086  | 0.023249394    | 2.139032357     | 0.034458054     | 0.034457989     |
| 0.012385554  | 0.012200102    | 0.01467317      | 1.057794063     | 1.057794131     |
| 0.078334019  | 0.076986157    | 2.441989349     | 0.121242524     | 0.121242253     |
| 0.034089389  | 0.03355353     | 0.040768118     | 0.050301445     | 0.050301347     |
| 0.103189426  | 0.101329726    | 2.128641411     | 0.164182417     | 0.16418202      |
| 0.014806685  | 0.014583741    | 1.667098042     | 3.564752757     | 3.564752754     |
| 0            | 0              | 1.906194013     | 0               | 0               |
| 0.032133391  | 0.031630425    | 0.038396285     | 1.766870689     | 1.766870853     |
| 0            | 0              | 0               | 0.590159038     | 0.590158634     |
| 0.140086716  | 0.137396212    | 2.309296352     | 0.232460546     | 0.232459916     |
| 0.072323907  | 0.07109388     | 2.409879979     | 0.111205101     | 0.111204857     |
| 0            | 0              | 1.563318133     | 0               | 0               |
| 0.120855022  | 0.118607962    | 2.662150249     | 0.196167917     | 0.196167416     |
| 1.127623627  | 0.02846197     | 1.134589754     | 1.135022492     | 1.135022653     |
| 0            | 0              | 2.992576186     | 1.036523768     | 1.036523284     |
| 0            | 0.774483896    | 3.236985447     | 3.238483508     | 3.238483412     |
| 0.053721515  | 0.0528413      | 3.329870165     | 2.663039115     | 2.663039265     |
| 0.150805611  | 0.1478583      | 0.189693046     | 0.253386262     | 0.253385552     |
| 1.477905074  | 0.110291353    | 2.174065089     | 0.180610533     | 0.180610083     |
| 0.174646163  | 0.171103457    | 0.221942252     | 0.301818594     | 0.301817685     |
| 0.019423754  | 0.019128196    | 0.023081769     | 2.447593004     | 2.447593068     |
| 0.095415408  | 2.043885882    | 1.438897418     | 4.229401453     | 4.22940121      |
| 0.09458733   | 0.092909202    | 2.527543134     | 2.567141904     | 2.567142212     |
| 0            | 0              | 3.432334096     | 0.699379548     | 0.699379234     |
| 0            | 0              | 0.979210931     | 4.054517266     | 4.054517273     |
| 0.041746585  | 0.041079481    | 1.193885521     | 0.06210396      | 0.062103836     |
| 0.056900219  | 0.055961838    | 0.068725011     | 0.086035309     | 0.086035129     |
| 0.027198418  | 0.02677729     | 0.032429909     | 0.039841914     | 0.039841839     |
| 0            | 0              | 4.045388573     | 0.946288145     | 0.946287594     |
| 0            | 0              | 0               | 0               | 0               |
| 0            | 0              | 2.439350211     | 3.930579983     | 3.930580092     |
| 0            | 0              | 2.241928337     | 3.074389132     | 3.074389067     |
| 0.064125422  | 0.063052356    | 0.07769484      | 0.097721914     | 0.097721705     |
| 0.167217613  | 0.163863971    | 0.211825901     | 2.511230537     | 2.511231168     |
| 0.082949192  | 0.081509266    | 4.409582805     | 0.129039855     | 0.129039562     |
| 0            | 0              | 3.31135068      | 0               | 0               |
| 0.055817189  | 0.054898701    | 0.067385242     | 0.084299108     | 0.084298933     |
| 0.014931864  | 0.014706971    | 0.017709358     | 0.021593342     | 0.021593303     |
| 0.066379519  | 0.065263734    | 1.306916223     | 0.10140522      | 0.101405001     |
| 0.044433555  | 0.043719464    | 0.053378036     | 1.20774049      | 1.207740741     |
| 0.082677795  | 0.081243321    | 0.100981847     | 0.128579155     | 0.128578863     |
| 0.040231569  | 0.039590745    | 1.186900937     | 3.983677177     | 3.983677114     |
| 0            | 0              | 4.154551478     | 0               | 0               |
| 0            | 0              | 0.925031769     | 2.886572124     | 2.886572094     |
| 0.103990427  | 0.102113583    | 0.128190129     | 0.165605684     | 0.165605282     |
| 0.120841577  | 0.11859482     | 1.553412473     | 0.196143092     | 0.196142591     |
| 0.074825827  | 0.073547031    | 0.0910811       | 0.115367622     | 0.115367367     |
| 0            | 0              | 3.968533411     | 0               | 0               |
| 0.001858658  | 0.001831508    | 1.595359664     | 3.183076781     | 3.183076783     |
| 0            | 0              | 2.292879197     | 0               | 0               |
| 1.771446521  | 0.036037703    | 0.043838331     | 1.791988925     | 1.791989111     |
| 0.01466437   | 0.014443641    | 1.068445382     | 0.02120059      | 0.021200551     |
| 0.009897155  | 0.009749816    | 0.0117125       | 0.014237613     | 0.014237588     |
| 0            | 5.144182587    | 4.350355944     | 9.880409496     | 9.880409926     |

|             |             |             |             |             |
|-------------|-------------|-------------|-------------|-------------|
| 0           | 0           | 3.430709936 | 0           | 0           |
| 0           | 0           | 0           | 1.41949069  | 1.419490537 |
| 0           | 0           | 0           | 0           | 0           |
| 0           | 0           | 3.386214852 | 0           | 0           |
| 0.024129614 | 0.023758544 | 0.028732524 | 2.477606288 | 2.477606366 |
| 0           | 0           | 2.352601917 | 0           | 0           |
| 0           | 0           | 1.571480116 | 0.688053019 | 0.688052695 |
| 0.006353359 | 0.006259558 | 1.620398372 | 0.009106081 | 0.009106065 |
| 0           | 0           | 0           | 0           | 0           |
| 0.044519041 | 0.043803446 | 2.257721848 | 0.066424788 | 0.066424655 |
| 0.041426119 | 0.040764586 | 0.049700284 | 1.818877033 | 1.818877241 |
| 0           | 0           | 2.979946821 | 2.978476407 | 2.978476402 |
| 0           | 0.983717299 | 0           | 4.294656974 | 4.294656983 |
| 0           | 0           | 1.050982953 | 0           | 0           |
| 0           | 0           | 0.931020372 | 0.931458943 | 0.931458865 |
| 0.038302414 | 0.037694831 | 0.045890406 | 0.056771561 | 0.056771449 |
| 0.125308676 | 0.122960923 | 1.573433939 | 0.204433055 | 0.204432525 |
| 0.00139892  | 0.001378507 | 2.59385545  | 4.469857748 | 4.469857744 |
| 0.205618035 | 0.201253347 | 2.616803084 | 0.36890278  | 0.368901563 |
| 0.006540872 | 0.00644426  | 1.030574939 | 1.030514417 | 1.030514453 |
| 0.186816748 | 0.182957471 | 1.846387439 | 0.32759752  | 0.327596497 |
| 0.010190777 | 0.010038963 | 0.012061516 | 0.014664484 | 0.014664457 |
| 0           | 0           | 0           | 0           | 0           |
| 0.060725047 | 0.059715794 | 1.281058054 | 2.70619136  | 2.706191522 |
| 2.493326945 | 0           | 0.928163819 | 0           | 0           |
| 0           | 0           | 0           | 0           | 0           |
| 0.032344195 | 0.031837697 | 2.189081745 | 0.047638104 | 0.047638012 |
| 0           | 0           | 0           | 0           | 0           |
| 0           | 0           | 1.828627043 | 0           | 0           |
| 0.04651341  | 0.045762616 | 2.59916638  | 0.069548769 | 0.069548629 |
| 0.141217115 | 2.67981012  | 1.644507699 | 3.471011057 | 3.471011066 |
| 0.096321576 | 0.094607217 | 1.442995257 | 1.452877421 | 1.452877977 |
| 0           | 0           | 1.186640382 | 0           | 0           |
| 0           | 0           | 0           | 0.746297618 | 0.746297347 |
| 0.514237573 | 0           | 0           | 1.300841027 | 1.300840493 |
| 2.117378476 | 0.021173688 | 1.100235598 | 0.031309848 | 0.03130979  |
| 0           | 0           | 2.540278913 | 0           | 0           |
| 0.001036506 | 0.001021395 | 2.006222625 | 3.007253968 | 3.00725397  |
| 0.046259889 | 0.045513585 | 1.214670206 | 0.069150918 | 0.069150779 |
| 0           | 0           | 0           | 0           | 0           |
| 0           | 0           | 1.709982359 | 0           | 0           |
| 0           | 0           | 0.965995904 | 0           | 0           |
| 0.047147165 | 0.046385131 | 1.841325915 | 0.070544265 | 0.070544122 |
| 0.211297818 | 0.206776607 | 1.953749022 | 0.381748385 | 0.381747104 |
| 0           | 0           | 0.855880742 | 0           | 0           |
| 8.615742497 | 0           | 0           | 0           | 0           |
| 0           | 0           | 2.13395183  | 0           | 0           |
| 0           | 0           | 2.035724717 | 0.424497276 | 0.424496773 |
| 0.018089735 | 0.017815308 | 1.685100244 | 0.026246544 | 0.026246496 |
| 0.003347055 | 0.003297989 | 1.015654819 | 0.004782314 | 0.004782306 |
| 0.019542223 | 0.019244783 | 2.706803016 | 3.306214426 | 3.306214438 |
| 0           | 0.803332079 | 2.512074727 | 3.256466193 | 3.256466162 |
| 0           | 3.559333452 | 1.801935259 | 8.845898492 | 8.845899121 |
| 0.073547841 | 0.072294007 | 0.089475905 | 1.344816495 | 1.344816916 |
| 0           | 0           | 4.15827147  | 0           | 0           |
| 0           | 0           | 2.283877004 | 0           | 0           |
| 0           | 0           | 1.548891092 | 0.672700828 | 0.672700491 |
| 0           | 0           | 0           | 2.455745707 | 2.455745647 |

|             |             |             |             |             |
|-------------|-------------|-------------|-------------|-------------|
| 0.04202052  | 0.041348647 | 0.050426415 | 0.062529751 | 0.062529626 |
| 0           | 0           | 2.206685486 | 0           | 0           |
| 2.397005415 | 0.075738366 | 0.093892854 | 2.805927323 | 2.805927507 |
| 0           | 0           | 1.955997134 | 0           | 0           |
| 0.052917734 | 2.605607212 | 0.063804563 | 8.145779932 | 8.145779426 |
| 0.02514272  | 0.024755195 | 1.117126905 | 0.036750909 | 0.03675084  |
| 0.016841504 | 0.016586738 | 1.678264474 | 3.116391871 | 3.116391892 |
| 0           | 0           | 0           | 0.548215109 | 0.548214676 |
| 3.719682665 | 0.243343455 | 0.326524083 | 2.966378458 | 2.96637903  |
| 0.069614348 | 0.068436679 | 2.39531699  | 0.10672251  | 0.106722277 |
| 0.018183482 | 0.017907574 | 0.021596287 | 0.026385151 | 0.026385103 |
| 0.06481379  | 0.063727713 | 1.299761257 | 0.098844843 | 0.098844631 |
| 0.015963281 | 0.015722284 | 2.908566032 | 0.02310979  | 0.023109747 |
| 0.146085544 | 0.143252161 | 2.787616328 | 0.244108517 | 0.244107843 |
| 2.067329266 | 1.054013772 | 0.014459414 | 6.045891144 | 6.045891065 |
| 0           | 0           | 0           | 2.764835091 | 2.764835077 |
| 0.055803622 | 0.054885383 | 0.067368466 | 0.084277384 | 0.084277209 |
| 0           | 0.644195033 | 1.499194213 | 3.617713445 | 3.617713468 |
| 0           | 0           | 2.56138682  | 0           | 0           |
| 0.064859772 | 1.280014313 | 0.078609614 | 1.949107068 | 1.949107385 |
| 0.096382366 | 0.094666734 | 2.536881499 | 0.152188421 | 0.15218806  |
| 0           | 0           | 1.00769545  | 0           | 0           |
| 0           | 0           | 0.691114543 | 0           | 0           |
| 0           | 0           | 1.413771214 | 0           | 0           |
| 0.109132261 | 0.107144411 | 2.602609492 | 0.174802453 | 0.174802022 |
| 0           | 0           | 2.173107213 | 1.450509673 | 1.450509549 |
| 0.076349543 | 0.075040847 | 0.092997225 | 0.117913772 | 0.117913509 |
| 0.052045208 | 0.051195399 | 1.241263287 | 0.078283596 | 0.078283435 |
| 0.014183187 | 0.013969937 | 1.066205338 | 0.020494635 | 0.020494598 |
| 0.008191149 | 0.008069692 | 2.636650071 | 1.038215568 | 1.038215612 |
| 0           | 0           | 1.227125855 | 3.110823876 | 3.110823806 |
| 0           | 0           | 0.920068078 | 0.920611918 | 0.920611828 |
| 0           | 0           | 0.965026314 | 0           | 0           |
| 0.021066578 | 0.02074483  | 0.025051846 | 4.32291378  | 4.322913727 |
| 0           | 0           | 0           | 0.979149441 | 0.979149416 |
| 0.078002799 | 0.076661492 | 2.44022662  | 0.120685938 | 0.120685668 |
| 0.066277343 | 2.939188874 | 0.080377095 | 7.967641233 | 7.967640594 |
| 0.008236001 | 0.008113866 | 0.009739626 | 0.011827508 | 0.011827487 |
| 0           | 0           | 1.689069229 | 0           | 0           |
| 0           | 2.641073878 | 0.630494759 | 7.828575583 | 7.82857618  |
| 1.104811053 | 1.706205065 | 0.028201249 | 7.542991058 | 7.542990853 |
| 1.853175126 | 1.856934847 | 2.019045323 | 5.85470806  | 5.854708607 |
| 0.056036045 | 0.055113544 | 2.921951184 | 0.084649631 | 0.084649454 |
| 0           | 0           | 3.009996293 | 0           | 0           |
| 0.061099536 | 0.060083293 | 2.349190718 | 0.092805507 | 0.092805311 |
| 0.035013073 | 1.153289187 | 0.041889563 | 5.255132733 | 5.255132555 |
| 0.003588889 | 5.343262675 | 0.004235546 | 10.11746467 | 10.11614046 |
| 0           | 0           | 1.466791801 | 0           | 0           |
| 0           | 0.684574396 | 2.95619873  | 4.754135469 | 4.754135692 |
| 0           | 0           | 1.666588485 | 0           | 0           |
| 0           | 0           | 0.444789079 | 1.70390195  | 1.703901424 |
| 2.207532363 | 1.16929593  | 0.046419709 | 6.19046677  | 6.190466497 |
| 0.949482822 | 0           | 0.947281375 | 0           | 0           |
| 0           | 0           | 0           | 0           | 0           |
| 0           | 4.446049209 | 0.89516085  | 8.586240357 | 8.586240553 |
| 0           | 0           | 0           | 2.68758877  | 2.68758862  |
| 0.027951606 | 4.330486401 | 0.033338871 | 9.326663087 | 9.324065754 |
| 0           | 2.548025547 | 0           | 6.267262148 | 6.267262411 |

| hsa-miR-5589-3p | hsa-miR-410-3p | hsa-miR-520d-5p | hsa-miR-301b-5p | hsa-miR-412-5p |
|-----------------|----------------|-----------------|-----------------|----------------|
| 2.779981186     | 6.769234751    | 0.079880877     | 0.077434625     | 5.559709596    |
| 0.07137001      | 2.626593225    | 0.05255896      | 1.833628766     | 3.127630151    |
| 2.145904456     | 4.928438368    | 0.025686067     | 0.024982285     | 2.741582377    |
| 5.340092693     | 4.615102279    | 0.013443189     | 2.39412741      | 4.090243722    |
| 2.024799636     | 5.68352276     | 0.086143149     | 0.083473584     | 3.850770933    |
| 4.243133727     | 3.558625061    | 0.037161265     | 1.153066451     | 3.698129186    |
| 6.495396974     | 5.031000126    | 0.114028377     | 0.110310609     | 2.962276694    |
| 5.502377164     | 6.853353705    | 0.016078872     | 1.066954319     | 5.064241092    |
| 4.740519392     | 6.183852271    | 0               | 1.501028749     | 4.881835032    |
| 0.046916317     | 3.927962594    | 0.035015357     | 5.919092726     | 2.527906998    |
| 0               | 1.708104373    | 0               | 1.441326981     | 1.064655061    |
| 4.235481218     | 6.241921004    | 0.155906595     | 1.605323018     | 5.189464893    |
| 4.964945217     | 5.211135992    | 0.079440077     | 0.077009376     | 3.811973785    |
| 0.981942602     | 7.54764594     | 0               | 0               | 5.901219221    |
| 3.348515269     | 3.346553074    | 0.134007071     | 0.129485161     | 1.56793304     |
| 2.508220367     | 5.019053616    | 0.031484062     | 0.030610408     | 3.523752822    |
| 0               | 7.855028257    | 0               | 3.841012585     | 5.993169346    |
| 3.714119025     | 7.428553024    | 0               | 0.363481337     | 6.453710146    |
| 4.904896282     | 5.709988288    | 0.058791222     | 1.23948804      | 4.550013145    |
| 6.054521687     | 4.303965252    | 0.168179667     | 1.649197902     | 3.527780535    |
| 1.531868495     | 6.304152044    | 0.124371352     | 0.120242753     | 3.296865935    |
| 4.444750691     | 3.906403764    | 0.195648045     | 0.188375103     | 3.383799833    |
| 4.389182776     | 4.389562623    | 0.021112155     | 1.087684518     | 1.694988018    |
| 4.345776749     | 4.100696236    | 0.105278405     | 3.100568766     | 2.115879768    |
| 5.353504883     | 5.241696527    | 0.104347885     | 0.101003891     | 4.820686016    |
| 9.416750928     | 6.048474777    | 0               | 2.375204192     | 2.12603291     |
| 0.979208525     | 4.054527589    | 0               | 0.979789484     | 3.55265791     |
| 4.690890794     | 6.188795939    | 0.045577855     | 0.044274582     | 2.85878395     |
| 1.905989558     | 5.657566369    | 0.062309062     | 1.253363206     | 5.618339219    |
| 7.486465124     | 4.657472751    | 0.029608612     | 1.122433376     | 4.783500737    |
| 2.319841697     | 9.474471139    | 0               | 0.499986356     | 5.183806576    |
| 5.584483381     | 5.284921641    | 0               | 0.999711969     | 4.321456472    |
| 0.547204149     | 5.222591533    | 0               | 0.546993386     | 4.622803635    |
| 5.018566611     | 5.926568979    | 0               | 1.299559072     | 4.839744099    |
| 5.09614846      | 4.845032288    | 0.07032132      | 1.912518885     | 4.912581616    |
| 3.861159313     | 3.861856154    | 0.187063894     | 0.180197916     | 4.245870814    |
| 0.127753097     | 9.014987658    | 0.091300954     | 2.43814696      | 8.082059132    |
| 0.817351123     | 10.90025301    | 0               | 2.079411091     | 8.994070384    |
| 5.304562436     | 4.088745768    | 0.061109995     | 0.059306134     | 3.844177326    |
| 2.909237427     | 6.282414189    | 0.016215214     | 0.01578023      | 5.155504417    |
| 0.100445579     | 4.860188026    | 0.072825557     | 1.923451589     | 4.267811858    |
| 2.605776872     | 6.279468162    | 0.048537317     | 0.047140845     | 3.474019662    |
| 3.347664286     | 5.335060557    | 0.090997395     | 3.263443987     | 3.115632069    |
| 5.04475685      | 5.579158371    | 0.043910575     | 1.180239668     | 4.192312157    |
| 2.90313793      | 10.6711348     | 0               | 0               | 11.26139656    |
| 3.582290646     | 5.124724658    | 0               | 0.926970978     | 4.338113172    |
| 5.356902353     | 4.284150428    | 0.114931397     | 2.100795875     | 4.014024139    |
| 1.572840494     | 5.687618609    | 0.133991816     | 1.525738766     | 4.618846656    |
| 8.985520217     | 4.845404104    | 0.082228585     | 0.079699138     | 2.002876898    |
| 0               | 11.04091812    | 0               | 2.815422027     | 8.495343479    |
| 4.657722416     | 5.921054557    | 0.002013112     | 2.332899212     | 5.223498611    |
| 2.616009938     | 5.275449656    | 0               | 0               | 1.527358356    |
| 6.198130508     | 6.825382627    | 0.039936127     | 0.038807657     | 4.261300186    |
| 5.809711296     | 7.144364846    | 0.015923875     | 1.066314225     | 4.966815276    |
| 5.243700605     | 4.320726742    | 0.010736937     | 1.637762288     | 4.320749694    |
| 2.458809209     | 10.03352738    | 5.83703524      | 2.273491158     | 8.194177723    |

|             |             |             |             |             |
|-------------|-------------|-------------|-------------|-------------|
| 4.797645537 | 6.132755872 | 0           | 1.087647574 | 2.347161543 |
| 2.130302805 | 3.690576986 | 1.425691022 | 0           | 0           |
| 4.775134696 | 5.100252857 | 0           | 1.614652133 | 2.351465194 |
| 0.671943862 | 10.3124723  | 0           | 3.413951995 | 9.149340744 |
| 5.850497069 | 4.699992592 | 0.026251767 | 0.025531589 | 4.568201488 |
| 4.972675835 | 6.095363323 | 0           | 0           | 5.394684069 |
| 3.553676386 | 5.001356225 | 0           | 0.689014561 | 3.63428664  |
| 3.74641949  | 6.2962339   | 0.006887542 | 1.618958065 | 4.691205796 |
| 1.965677165 | 6.243268626 | 0           | 0           | 3.131002425 |
| 4.639142203 | 5.533038846 | 0.048631523 | 1.815856755 | 3.896007002 |
| 6.108356263 | 4.382636844 | 0.045225098 | 1.185510069 | 3.608447363 |
| 4.43653176  | 6.499986094 | 0           | 0           | 2.564253491 |
| 4.72742682  | 4.972309341 | 1.565053903 | 0.983373127 | 5.101552171 |
| 4.820206896 | 6.534744515 | 0           | 1.062937478 | 4.847374231 |
| 2.704648861 | 6.114459086 | 0           | 3.228873001 | 3.215428953 |
| 5.487367258 | 4.597298008 | 0.041788971 | 1.784598457 | 3.064074289 |
| 5.012120358 | 4.647066265 | 0.139064699 | 0.134332299 | 3.375082098 |
| 2.594410826 | 6.332624962 | 0.001515029 | 0.001475745 | 5.595583535 |
| 1.99224831  | 4.477837014 | 0.231681202 | 0.222618576 | 1.984272032 |
| 1.030651326 | 5.093503246 | 0.007091088 | 0.006904805 | 2.628851732 |
| 0.323128899 | 4.797986477 | 0.209760882 | 0.201802524 | 4.523775896 |
| 3.881140142 | 4.244690599 | 0.011056124 | 1.046159115 | 3.658157709 |
| 1.371885306 | 5.136151106 | 0           | 1.781343785 | 3.887716666 |
| 7.966709821 | 5.479154126 | 0.066547735 | 0.064561968 | 4.597332788 |
| 0.928314981 | 5.307997509 | 0           | 3.487463075 | 3.347585577 |
| 3.76679335  | 6.114118859 | 0           | 0           | 4.347365561 |
| 4.231029043 | 6.74787497  | 0.035246548 | 0.034260511 | 5.559535856 |
| 3.778890704 | 6.840456701 | 0           | 0           | 5.140452632 |
| 0.869818191 | 7.566833982 | 0           | 0.872355885 | 4.737901252 |
| 4.791187975 | 4.134437523 | 0.050830238 | 1.82582118  | 1.846429119 |
| 7.44760762  | 5.117972233 | 0.157198632 | 2.267810937 | 5.11707573  |
| 3.632382772 | 3.964960737 | 0.106297009 | 0.102878597 | 4.831912958 |
| 6.981664057 | 5.022799216 | 0           | 3.431518432 | 0           |
| 4.731813725 | 4.26519983  | 0           | 1.277795255 | 1.64987439  |
| 0           | 0.516293446 | 0.508377811 | 0.51015746  | 2.009752183 |
| 2.728144728 | 5.288610472 | 0.023381225 | 0.022743853 | 4.913165109 |
| 4.035714086 | 5.618966406 | 0           | 0.968261046 | 4.854014931 |
| 3.329333484 | 7.374283889 | 0.001122453 | 1.004710461 | 4.007632903 |
| 1.217299261 | 5.033594772 | 0.050550645 | 1.206789371 | 3.312847234 |
| 3.815321242 | 3.403664109 | 0           | 0.887835106 | 3.815122531 |
| 0.783589233 | 6.578645164 | 0           | 3.775575851 | 6.133653803 |
| 7.153787748 | 5.336775075 | 0           | 1.545682279 | 4.193628861 |
| 3.785993232 | 6.667021952 | 0.051529288 | 2.853217247 | 5.866131141 |
| 4.93677931  | 5.377024419 | 0.238331333 | 0.228924303 | 5.374809513 |
| 7.158994405 | 4.286757981 | 0           | 0           | 3.674667136 |
| 1.888196758 | 5.148579688 | 0           | 0           | 4.770950775 |
| 1.415249253 | 6.886370405 | 0           | 1.826794283 | 4.900691521 |
| 2.541498175 | 6.953658998 | 0           | 1.890192152 | 5.591428206 |
| 1.68813881  | 4.991871284 | 0.019656927 | 0.019125512 | 3.587716497 |
| 4.417123531 | 5.347240053 | 0.003626278 | 0.003531784 | 5.069589712 |
| 0.028166511 | 8.113194584 | 0.021241425 | 1.688382885 | 5.502891451 |
| 5.298277818 | 5.917403688 | 0           | 1.739106603 | 6.418344291 |
| 5.764993423 | 6.415494402 | 4.57164974  | 3.91072185  | 2.728668875 |
| 9.41945445  | 3.819307946 | 0.080803874 | 2.723122747 | 4.761856673 |
| 0.370436701 | 7.750788478 | 0           | 0           | 6.863593388 |
| 4.551832061 | 7.293623793 | 0           | 0           | 3.35801203  |
| 3.439366109 | 6.316754543 | 0           | 0.673415157 | 4.330239194 |
| 6.120433935 | 5.80706303  | 0.913083348 | 1.481825069 | 5.497310664 |

|             |             |             |             |             |
|-------------|-------------|-------------|-------------|-------------|
| 2.257448472 | 6.062669773 | 0.045879427 | 0.044566704 | 4.623095556 |
| 3.231618076 | 7.374553166 | 0           | 1.101930905 | 3.63528006  |
| 0.117939718 | 1.357937083 | 1.344327999 | 1.340613323 | 3.080915463 |
| 0.904020043 | 6.655811514 | 0           | 0.913234588 | 2.756689037 |
| 7.123138556 | 4.901357808 | 3.896777882 | 0.056204207 | 4.768921791 |
| 2.155247408 | 7.254369394 | 0.027359512 | 0.026607114 | 5.471255505 |
| 3.821168025 | 5.334934963 | 0.018295981 | 1.076099119 | 1.078290199 |
| 2.071484082 | 4.485774193 | 0           | 0.546279654 | 3.820540447 |
| 5.677640774 | 4.901239219 | 0.282736138 | 0.27092037  | 4.352679957 |
| 2.421727108 | 5.889422791 | 0.076423178 | 1.308536676 | 5.888556795 |
| 5.178619821 | 4.71881509  | 0.019759166 | 1.68130042  | 4.302409797 |
| 6.161758006 | 6.138118073 | 0.071085845 | 1.91586141  | 5.63260806  |
| 2.916191326 | 5.847651079 | 0.017338861 | 0.016872553 | 4.438949777 |
| 6.340405567 | 5.571093647 | 0.16276931  | 0.15701368  | 3.216223891 |
| 6.676492317 | 4.549523365 | 2.394041835 | 1.055246901 | 3.54641951  |
| 4.538859061 | 4.760888397 | 0           | 0.972048792 | 4.202073538 |
| 0.083506371 | 3.971359668 | 0.061094977 | 0.059291614 | 1.897935781 |
| 4.779914811 | 7.294267863 | 0.637746322 | 0           | 4.964732341 |
| 6.346917534 | 4.431786279 | 0           | 0.983212178 | 4.972054155 |
| 1.305191043 | 1.300896648 | 0.071136922 | 1.287964476 | 1.302539604 |
| 4.90802329  | 5.058304909 | 0.106365354 | 2.065662139 | 0.15327349  |
| 3.11117534  | 9.039844987 | 0           | 0           | 7.371730094 |
| 2.118090525 | 5.435962881 | 0           | 0           | 4.275871772 |
| 1.051801641 | 6.894895489 | 0           | 0.581915241 | 5.359086025 |
| 4.31453321  | 4.045701972 | 0.120734599 | 2.563456814 | 1.511889249 |
| 5.34260755  | 6.445761145 | 0           | 0.893166695 | 6.192003467 |
| 4.105652732 | 3.978248995 | 0.083928153 | 0.081338086 | 2.011257424 |
| 3.945969801 | 4.366861344 | 0.056937825 | 3.298807193 | 2.316104037 |
| 5.427352981 | 6.566537624 | 0.015399878 | 0.01498753  | 5.427920827 |
| 2.375378649 | 6.830507684 | 0.008883131 | 1.628723784 | 5.148858955 |
| 2.544648888 | 5.797487081 | 0           | 2.182854316 | 5.052419589 |
| 1.892455911 | 5.294452614 | 0           | 0.922121465 | 3.779653533 |
| 0.965044361 | 3.645740572 | 0           | 0.965981525 | 4.265955219 |
| 4.400897248 | 4.322971847 | 0.022905309 | 0.02228157  | 1.097949704 |
| 4.358914105 | 4.824142805 | 0           | 0.979641676 | 2.554722888 |
| 6.432536356 | 4.937701514 | 0.085773337 | 0.083117083 | 4.540035274 |
| 4.711446571 | 5.934207877 | 3.843239327 | 1.294105582 | 5.053681894 |
| 4.230340872 | 4.308602568 | 0.008931852 | 0.008696209 | 1.03827394  |
| 1.91310722  | 7.424817327 | 0           | 1.050945055 | 6.825370887 |
| 3.612426885 | 5.642805868 | 4.016349858 | 1.810203804 | 4.305552043 |
| 5.66652093  | 2.741653028 | 3.466183924 | 1.106768158 | 1.718967958 |
| 1.28951446  | 8.481852638 | 3.27564134  | 2.905156567 | 6.648210486 |
| 3.972518831 | 6.187121944 | 0.061352259 | 2.303436889 | 5.95886301  |
| 4.862756204 | 6.543611165 | 0           | 0.475129186 | 3.35940286  |
| 1.929335064 | 6.418536299 | 0.066963083 | 0.06496328  | 5.481171594 |
| 4.644186793 | 5.749258294 | 1.158595716 | 0.037100527 | 4.574328698 |
| 0.005089668 | 5.071419924 | 5.514541085 | 1.016294855 | 3.025038133 |
| 3.651983018 | 5.538145666 | 0           | 1.470989099 | 3.843346846 |
| 4.681909318 | 5.816957381 | 1.188770174 | 0           | 5.555679686 |
| 5.301102392 | 6.685797157 | 0           | 0           | 5.779023746 |
| 3.963925805 | 3.501817    | 0           | 0.887175718 | 2.227086867 |
| 7.077442739 | 4.081367404 | 0.042266649 | 1.786792938 | 1.180293116 |
| 4.722058286 | 7.388167843 | 0           | 0           | 5.746160538 |
| 0.978700913 | 4.136090631 | 0           | 4.141284063 | 1.558999328 |
| 3.295203907 | 6.26757143  | 4.245294308 | 0           | 5.285715244 |
| 0           | 5.961323844 | 0           | 0.703443304 | 4.127146368 |
| 5.01113906  | 5.415568934 | 4.814719267 | 3.867860981 | 4.371839181 |
| 3.01319094  | 6.825118626 | 2.060691645 | 0           | 5.857227239 |

| hsa-miR-6720-3p | hsa-miR-6516-3p | hsa-miR-6734-5p | hsa-miR-561-5p | hsa-miR-432-5p |
|-----------------|-----------------|-----------------|----------------|----------------|
| 2.345660915     | 1.296442545     | 0.05914965      | 2.386311449    | 5.726294399    |
| 0.04064452      | 1.199037754     | 0.039469486     | 2.261478702    | 2.291895622    |
| 0.020122644     | 1.099273053     | 1.697081965     | 2.131610696    | 4.757932379    |
| 0.010595199     | 1.0524469       | 0.010308295     | 0.012999418    | 3.896945263    |
| 1.940641593     | 0.066733859     | 0.063585264     | 1.979540697    | 6.862632574    |
| 0.028950321     | 0.029422349     | 0.028133795     | 0.035869042    | 3.941566787    |
| 0.085716767     | 0.087288668     | 1.404800049     | 0.109431403    | 3.240471328    |
| 1.062249005     | 1.062602468     | 0.012311655     | 0.015544925    | 5.016908416    |
| 0               | 0.933643549     | 0.934573722     | 0              | 4.881791546    |
| 0.027306914     | 1.739100298     | 1.132153149     | 0.033803302    | 2.527551305    |
| 6.055683694     | 0.604812537     | 1.105823303     | 3.750064376    | 1.94554321     |
| 0.115073603     | 2.190918691     | 2.17676286      | 0.149167908    | 6.383097803    |
| 0.060662131     | 1.294901783     | 1.289486126     | 1.319388567    | 3.952390707    |
| 0               | 2.563820362     | 1.980078072     | 1.564207531    | 6.50949947     |
| 0.09985016      | 2.116564787     | 0.096620771     | 0.128417435    | 4.119371062    |
| 0.024595152     | 1.724123566     | 0.02390798      | 0.030402465    | 4.602211983    |
| 0.586096233     | 0               | 0.588653401     | 2.161818845    | 7.760024349    |
| 2.465999439     | 0               | 0.801826559     | 0              | 6.059723083    |
| 0.04532983      | 1.836910487     | 0.044006644     | 0.056653629    | 4.703533242    |
| 0.123487215     | 0.125911408     | 0.119332302     | 4.780803314    | 4.145782473    |
| 0.093063534     | 1.447115667     | 1.438171278     | 0.119267171    | 5.906491669    |
| 0.142024451     | 1.670802922     | 0.137104373     | 0.18666585     | 3.382481202    |
| 0.016576568     | 1.679422302     | 1.080583248     | 0.020403135    | 2.447125472    |
| 0.079450304     | 0.080889869     | 1.376180461     | 0.101099191    | 3.19309081     |
| 1.377788551     | 1.380459814     | 0.076327224     | 1.41424341     | 2.564800076    |
| 0               | 1.239052238     | 0.716922908     | 0              | 4.928862461    |
| 0               | 1.562794007     | 0               | 0              | 3.290102159    |
| 0.035363643     | 1.173509386     | 0.034352509     | 0.043964725    | 5.109657877    |
| 0.047962516     | 0.048777762     | 1.845486081     | 0.060027618    | 4.488254391    |
| 0.023151195     | 0.023523724     | 0.022506408     | 0.028595558    | 3.35821205     |
| 0               | 1.343930621     | 1.64692344      | 3.004175556    | 6.124449218    |
| 0               | 1.584647641     | 1.584653302     | 2.806970173    | 3.45897558     |
| 1.047282068     | 0               | 1.720746015     | 1.670729747    | 3.198429838    |
| 0.777503043     | 0.776538848     | 0.779224147     | 0              | 3.92226491     |
| 1.261089292     | 1.882555985     | 1.258075118     | 0.06770566     | 5.502165661    |
| 0.136273914     | 0.139007213     | 0.131594808     | 0.178583259    | 3.862687874    |
| 1.33372323      | 1.336021477     | 2.712366713     | 0.087767307    | 9.246709972    |
| 0               | 0.82936436      | 1.385261355     | 0              | 9.800146989    |
| 0.04706612      | 2.272804788     | 1.225893539     | 0.058877782    | 2.337813182    |
| 0.012762431     | 2.400530343     | 1.656570961     | 0.015676574    | 4.357279782    |
| 0.055782159     | 3.138886014     | 1.266745156     | 1.293792787    | 3.617462342    |
| 0.037606576     | 0.038231659     | 1.181213117     | 0.046808906    | 4.315111389    |
| 0.069119244     | 1.334977765     | 1.328676943     | 0.087477469    | 5.101300193    |
| 1.166348938     | 0.034659652     | 2.196033243     | 0.042361832    | 6.804055579    |
| 1.516437518     | 3.244316463     | 0.942018375     | 0              | 11.59017227    |
| 0               | 0               | 0               | 0              | 3.967490758    |
| 0.08636079      | 0.08794644      | 1.407733198     | 1.453836835    | 4.402783257    |
| 0.099839459     | 0.101719187     | 1.468779436     | 0.128402958    | 3.784444029    |
| 0.062710665     | 1.304632174     | 0.060815754     | 3.416689236    | 3.496890292    |
| 0               | 0               | 1.845476427     | 0              | 10.35622568    |
| 0.001595699     | 1.007923599     | 1.594013046     | 0.001948385    | 5.47352937     |
| 0               | 0.676507407     | 0.679981829     | 1.169482076    | 4.21092091     |
| 0.031070406     | 1.152681774     | 0.030190089     | 1.16388854     | 4.788437129    |
| 0.012534935     | 0.0127317       | 2.073877551     | 0.01539526     | 6.768914632    |
| 0.008473655     | 2.374400629     | 2.050183986     | 0.010384677    | 2.651116706    |
| 0.788180982     | 0.787252322     | 0               | 0.776757612    | 9.847755078    |

|             |             |             |             |             |
|-------------|-------------|-------------|-------------|-------------|
| 1.493031171 | 1.113363177 | 0.619198126 | 0           | 5.532414354 |
| 0           | 1.437921259 | 0           | 0.86877176  | 1.420405149 |
| 0.723675581 | 0           | 1.646808163 | 2.895164069 | 1.596069292 |
| 0           | 1.900191673 | 0.691273718 | 0           | 8.522416696 |
| 0.020560127 | 2.122598845 | 0.019990764 | 0.025360106 | 4.080308013 |
| 0.84781759  | 0           | 0.849082426 | 0.838984159 | 5.149155359 |
| 0           | 0           | 0.705817344 | 0           | 4.359849433 |
| 0.005446125 | 1.027007224 | 0.005300393 | 1.028760996 | 4.570798207 |
| 0           | 1.557607122 | 2.292882638 | 0           | 5.167768735 |
| 0.037677871 | 1.795742992 | 1.181551214 | 0.046899422 | 4.905310528 |
| 1.780308976 | 0.035676008 | 1.777814148 | 0.043625624 | 3.280774584 |
| 0           | 0           | 1.984177301 | 0           | 5.62044143  |
| 0           | 1.566736054 | 1.567060414 | 0.983404165 | 3.144004972 |
| 0           | 1.763777112 | 2.023790781 | 0           | 5.206315577 |
| 0           | 0           | 0           | 1.505058685 | 5.586619976 |
| 0.03248292  | 1.767494205 | 2.187089696 | 0.040321577 | 3.587257547 |
| 0.103390463 | 0.105349653 | 1.484756309 | 0.133215306 | 4.84431286  |
| 1.005933316 | 0.001219538 | 1.005876414 | 1.592460504 | 3.331907529 |
| 1.770380601 | 0.169244705 | 0.159812806 | 0.220494454 | 5.431570366 |
| 0.005606504 | 1.027800986 | 0.005456424 | 0.006860382 | 5.604011465 |
| 0.151397189 | 0.154508989 | 0.146077544 | 0.199934171 | 5.028122915 |
| 0.008724175 | 1.043213552 | 0.008488948 | 1.639173712 | 3.070645105 |
| 0           | 1.39508883  | 0           | 0           | 3.887813098 |
| 0.051123311 | 0.051998113 | 1.244946959 | 0.064090619 | 4.889834542 |
| 2.500131427 | 0.934029909 | 0           | 0           | 4.836774612 |
| 2.410591522 | 0           | 1.429588394 | 0           | 5.45841412  |
| 2.751709688 | 0.027930771 | 1.737048577 | 0.034025888 | 6.020225007 |
| 1.565726785 | 1.56560209  | 2.564148449 | 0           | 5.828265805 |
| 0           | 0           | 0           | 0           | 7.008222466 |
| 1.191540573 | 0.039996432 | 0.038205809 | 0.049011641 | 3.487545444 |
| 0.115963262 | 1.552617917 | 0.112109163 | 0.15039019  | 4.746737556 |
| 0.080182245 | 2.0182477   | 0.077678293 | 0.1020697   | 3.965341711 |
| 1.609521715 | 0           | 1.613561332 | 0           | 2.310782854 |
| 0           | 0.759776621 | 1.300895836 | 1.278381331 | 2.59993119  |
| 0           | 0           | 1.367982566 | 3.9074576   | 0           |
| 0.018337716 | 2.434084713 | 1.089079403 | 0.022592053 | 4.404469748 |
| 1.550302019 | 0           | 0.970577234 | 0           | 5.156303458 |
| 1.59007374  | 1.004421022 | 0.000866548 | 0.001086439 | 5.914792652 |
| 0.039128877 | 1.803589416 | 1.18842777  | 0.048743087 | 4.577827535 |
| 0           | 1.867303211 | 0.895408327 | 0           | 2.635672189 |
| 0           | 1.342428177 | 0           | 0           | 5.735022855 |
| 0           | 0.968886524 | 0           | 0           | 4.26752039  |
| 0.0398678   | 1.195289263 | 0.038717078 | 0.049683046 | 5.385500398 |
| 0.170073149 | 0.173671104 | 0.163932795 | 0.226720545 | 5.630874738 |
| 0           | 0.866730194 | 0.868485207 | 0           | 2.78009582  |
| 0           | 0.923626739 | 0.924687658 | 3.058256362 | 3.7746346   |
| 0           | 0.872840141 | 0           | 0           | 5.834943596 |
| 1.22195031  | 0.436221777 | 1.754205382 | 0           | 5.768407666 |
| 3.266435843 | 0.015689149 | 0.015022172 | 1.081531896 | 4.380026859 |
| 1.014177859 | 0.002916101 | 0.002795664 | 0.003509243 | 3.931395054 |
| 1.081902702 | 0.016941361 | 0.016219155 | 0.02052786  | 7.316969695 |
| 1.759871573 | 2.072629627 | 0.812308762 | 0.800296316 | 4.700112324 |
| 0           | 1.168000136 | 1.173635748 | 0           | 5.462181178 |
| 0.061664666 | 2.352187133 | 1.294146446 | 0.077737248 | 4.599491247 |
| 1.135151093 | 0.382816084 | 0.805325965 | 1.787301018 | 6.956132123 |
| 0           | 0           | 0.805532817 | 0           | 5.545725274 |
| 2.156658392 | 1.592259254 | 1.598760698 | 1.564432232 | 4.629345189 |
| 1.489763753 | 0.918530399 | 1.490802704 | 0           | 4.10508058  |



|             |             |             |             |             |
|-------------|-------------|-------------|-------------|-------------|
| 0.035592487 | 1.784432814 | 0.034574318 | 0.044254608 | 4.947189401 |
| 1.129400289 | 1.127251558 | 0.62985317  | 0           | 6.596604028 |
| 0.064538173 | 1.313300297 | 1.307482348 | 0.08148299  | 3.080264536 |
| 0.488123295 | 0.942178063 | 1.306951443 | 4.21208618  | 4.719372878 |
| 0.044663274 | 0.045417108 | 1.828277752 | 1.235400763 | 4.544615319 |
| 1.7056295   | 0.021759336 | 1.704143723 | 0.026427974 | 6.316660678 |
| 0.014385342 | 1.071113324 | 1.665551895 | 0.01768538  | 4.768147115 |
| 1.046350645 | 0           | 1.42118029  | 0           | 2.075194344 |
| 0.198356743 | 0.202728725 | 0.190913952 | 0.2681613   | 4.901194662 |
| 0.058439995 | 2.334841886 | 0.056688761 | 0.073546894 | 5.076390585 |
| 0.015524581 | 0.015770003 | 1.075502228 | 0.019097577 | 4.454964422 |
| 0.054493776 | 0.055432861 | 0.052873462 | 0.068437819 | 5.319224132 |
| 1.0670605   | 0.013853902 | 0.013267342 | 1.072005123 | 5.163132242 |
| 0.119788453 | 0.122125134 | 0.115782135 | 0.15565764  | 6.386824286 |
| 0.010442299 | 1.051692811 | 0.010159634 | 0.012810775 | 2.890545901 |
| 0           | 0           | 1.554804898 | 0           | 3.954520202 |
| 0.047054887 | 0.047853162 | 0.04567651  | 0.058863379 | 3.176927532 |
| 0.655364114 | 0.654068974 | 0           | 0           | 6.375758348 |
| 0           | 1.566559112 | 0           | 0.98324351  | 4.431780246 |
| 1.26395529  | 0.055471442 | 1.879463408 | 4.369267693 | 1.301589514 |
| 0.080231333 | 2.018496466 | 0.077725622 | 0.102134813 | 4.986879182 |
| 0           | 1.047198983 | 1.424743256 | 0           | 8.005685485 |
| 0           | 0.70995627  | 0           | 2.724821279 | 4.374240022 |
| 0.599017048 | 0.597614752 | 0.601535924 | 0           | 5.138038814 |
| 0.090487687 | 0.092162102 | 0.087608796 | 0.115810405 | 4.741648256 |
| 1.46670114  | 1.873767909 | 1.467973442 | 0           | 5.545595647 |
| 1.932311545 | 0.065080512 | 0.062019487 | 0.080724132 | 4.106804787 |
| 1.213555184 | 1.214914629 | 2.842129046 | 2.281950268 | 1.241730392 |
| 0.012125598 | 0.012315753 | 1.059054732 | 0.014889261 | 5.315377817 |
| 1.034586637 | 0.007125796 | 0.006828637 | 0.008592927 | 5.789810613 |
| 1.651183764 | 0.728529871 | 1.965346232 | 1.624100678 | 4.502141697 |
| 0.926906653 | 1.498675076 | 1.500149853 | 0           | 3.459608163 |
| 0           | 1.960465019 | 1.548217592 | 0.966043741 | 3.405348869 |
| 0.017968655 | 1.088714546 | 1.087300017 | 0.022133011 | 1.703936871 |
| 0.980964249 | 0.98086339  | 1.97687371  | 0           | 2.776492437 |
| 0.065307358 | 0.066458034 | 1.934402433 | 0.082487531 | 5.00554588  |
| 0.055698121 | 0.056660368 | 0.05403804  | 0.06999485  | 4.368143319 |
| 0.007055407 | 2.042717745 | 1.034433526 | 0.008640023 | 3.057181617 |
| 0.589367896 | 1.450448004 | 0.591915608 | 0.572552397 | 6.333062492 |
| 1.1616227   | 0.651151971 | 1.165279516 | 0.636839502 | 3.280579383 |
| 0.020186818 | 1.699626088 | 0.019628256 | 0.024894688 | 1.718634421 |
| 3.519679091 | 1.350055795 | 0.995086765 | 3.655798531 | 6.404307658 |
| 0.047247311 | 0.048049179 | 0.045862756 | 0.059110115 | 5.04387139  |
| 0           | 0.49189623  | 0           | 0.475586906 | 5.168040533 |
| 1.249251665 | 1.250877578 | 2.290164537 | 3.516833106 | 5.294009823 |
| 1.145264295 | 0.030211174 | 1.143712944 | 0.036844871 | 4.055861644 |
| 0.003079316 | 0.003126563 | 0.002997371 | 2.606412406 | 4.550317331 |
| 0           | 1.887703089 | 0.911248993 | 0           | 4.364426929 |
| 0           | 0           | 0.697148002 | 0.680449946 | 5.18304298  |
| 0.768140187 | 0           | 0.769915918 | 0           | 5.52433212  |
| 0           | 0           | 1.56661796  | 1.747207116 | 2.367261228 |
| 0.032846674 | 1.161306916 | 0.031912498 | 1.173240955 | 4.525842605 |
| 0.95192367  | 0           | 0           | 0           | 6.81954065  |
| 0           | 0.980537284 | 0.980821587 | 0           | 3.289321884 |
| 0           | 0.90341616  | 2.461554963 | 0           | 4.685778499 |
| 0           | 0           | 0.719754205 | 4.981281906 | 4.647337927 |
| 0.023786326 | 0.024169633 | 0.023122928 | 0.029389996 | 4.006875253 |
| 0           | 0.818495952 | 0           | 1.751717949 | 5.161230403 |

| hsa-miR-1224-5p | hsa-miR-485-3p | hsa-miR-371a-3p | hsa-miR-944 | hsa-miR-3934-5p |
|-----------------|----------------|-----------------|-------------|-----------------|
| 1.97835149      | 5.763847484    | 0.102299839     | 1.994125081 | 0.066780838     |
| 1.848541733     | 2.627823684    | 0.066289089     | 0.067872162 | 0.04433202      |
| 1.110600397     | 4.696183658    | 0.031916711     | 4.753317403 | 2.448973289     |
| 1.654276046     | 3.085855709    | 0.016591686     | 2.667445136 | 0.011488464     |
| 2.007485913     | 5.409035519    | 0.110708682     | 2.47061637  | 0.071871615     |
| 1.773322054     | 0.050462557    | 0.046469651     | 3.936950729 | 0.031504884     |
| 0.130810734     | 0.164839531    | 0.148872945     | 2.160882662 | 0.0943022       |
| 1.667705163     | 4.107638049    | 0.01987349      | 1.669899539 | 0.013728588     |
| 0               | 3.971859497    | 0               | 1.495554653 | 0.932243214     |
| 5.702079015     | 1.149785203    | 0.043734173     | 0.044728198 | 1.137768013     |
| 7.828151136     | 1.063915451    | 0               | 1.414036878 | 3.100259235     |
| 1.645740487     | 4.840679712    | 0.208471458     | 1.66990848  | 0.127290592     |
| 0.090281141     | 2.436413721    | 1.343543346     | 4.660213318 | 0.066421745     |
| 2.297591585     | 4.970799415    | 0.981703469     | 2.296629444 | 0.983141789     |
| 3.282592307     | 4.119458762    | 0.176956572     | 0.182187615 | 0.110141387     |
| 0.035316772     | 3.197951665    | 0.039246759     | 0.040129798 | 0.026742553     |
| 0.561933344     | 5.226037365    | 0               | 3.488425097 | 1.730987031     |
| 0.357317731     | 5.426465568    | 0               | 1.894562386 | 0.374019694     |
| 0.066440402     | 4.549868285    | 0.074407532     | 1.255058115 | 2.272372252     |
| 0.195771575     | 3.244535573    | 0.226475245     | 4.543691664 | 0.136807283     |
| 0.143075737     | 4.066420304    | 1.534636919     | 5.442919871 | 0.102525722     |
| 0.229431474     | 3.027402294    | 1.835064295     | 1.838897606 | 0.157870517     |
| 0.023615362     | 2.939305328    | 0.026167143     | 2.120217861 | 1.682195781     |
| 1.442395546     | 2.116681188    | 0.136769493     | 1.454271628 | 1.395215558     |
| 2.090956937     | 3.421901036    | 0.135489289     | 2.11400916  | 2.025991189     |
| 0               | 3.87384973     | 0               | 3.881341802 | 0               |
| 2.293890147     | 1.972273842    | 0               | 3.138661436 | 0               |
| 3.068061314     | 3.877251164    | 0.057261416     | 4.196039132 | 0.038532395     |
| 1.265237965     | 3.184580462    | 1.270161825     | 0.080953267 | 1.859540485     |
| 0.033196038     | 2.76509945     | 0.036870616     | 0.03769572  | 0.025165379     |
| 2.006731407     | 8.958360263    | 0               | 3.734356946 | 1.865271022     |
| 0               | 4.321456571    | 0               | 1.584596938 | 1.999657513     |
| 3.322895083     | 3.281831872    | 0               | 0.541752913 | 1.9437991       |
| 0               | 4.452737083    | 0               | 3.998083148 | 0.772554861     |
| 1.298611051     | 4.844592684    | 0.089575831     | 1.304627392 | 0.058970783     |
| 1.768260529     | 1.794565478    | 0.254667632     | 3.322320815 | 1.667469577     |
| 1.385251904     | 8.32393672     | 0.117678616     | 4.008509954 | 1.34588695      |
| 0.815596474     | 8.16603178     | 0.814724575     | 0           | 0               |
| 0.06910444      | 1.898493714    | 0.077442411     | 6.814640577 | 0.051400177     |
| 1.668398441     | 5.065090822    | 0.020043514     | 4.10635209  | 0.013844359     |
| 0.08261536      | 2.740513612    | 0.092895982     | 4.91338546  | 1.279292147     |
| 1.829045026     | 2.271049573    | 0.061079958     | 3.101057696 | 1.801951997     |
| 1.384005806     | 2.839564851    | 0.117267296     | 4.554338442 | 0.075804088     |
| 0.049423077     | 5.462675559    | 0.055115649     | 1.190892657 | 0.037143368     |
| 0               | 9.459642524    | 0               | 0.935258614 | 0               |
| 0               | 3.342606842    | 0               | 4.524705027 | 0               |
| 0.131878887     | 3.680847792    | 0.150128801     | 3.997454415 | 2.499976081     |
| 1.55839737      | 2.718509887    | 0.176934888     | 3.767685684 | 1.493854774     |
| 1.347915578     | 3.298431124    | 0.105445429     | 1.355698484 | 1.313387511     |
| 0.863896098     | 8.923420647    | 0               | 0.863347374 | 0               |
| 0.002240094     | 4.871944978    | 0.002469041     | 1.595678875 | 1.59443653      |
| 0               | 3.584712616    | 0               | 5.710231474 | 2.125054594     |
| 0.044901044     | 6.398586197    | 0.050016503     | 3.418432971 | 0.033826082     |
| 0.017786731     | 5.810280407    | 0.019680234     | 2.091009929 | 1.063481443     |
| 0.011976035     | 2.386268479    | 0.013231891     | 6.991134674 | 2.052838546     |
| 0.771105871     | 8.775834709    | 7.967915688     | 1.299845061 | 0               |

|             |             |             |             |             |
|-------------|-------------|-------------|-------------|-------------|
| 0.593156515 | 4.856548865 | 0           | 2.652331227 | 0           |
| 0           | 1.41975992  | 0           | 2.795561413 | 0.873134982 |
| 0.703463585 | 3.212550112 | 0           | 0           | 2.601716282 |
| 0.667553913 | 7.275135909 | 0           | 3.040565963 | 0           |
| 2.143343262 | 2.745090158 | 0.032629832 | 5.787883109 | 0.022337486 |
| 0.834456637 | 4.853595781 | 0           | 0           | 0           |
| 1.190895226 | 3.783365708 | 0           | 0           | 1.217310755 |
| 1.620648143 | 3.853583263 | 0.008470067 | 3.745717867 | 0.005899241 |
| 0           | 4.280989302 | 0           | 2.547997409 | 0.976054291 |
| 1.207893396 | 3.474682903 | 0.061201716 | 1.837651055 | 0.041072509 |
| 0.050920849 | 3.60851082  | 0.056807092 | 0.058136186 | 1.176701565 |
| 0           | 5.468511167 | 0           | 2.564293691 | 0           |
| 0           | 2.974350721 | 0           | 2.782244839 | 0           |
| 0.574343884 | 4.627709061 | 0.574463561 | 1.046012061 | 0           |
| 1.909800181 | 3.476882645 | 0           | 1.907104111 | 0.935330157 |
| 1.179024747 | 1.178614486 | 0.052390883 | 4.437467427 | 1.163659006 |
| 0.160615116 | 4.536957279 | 1.596781823 | 3.084364076 | 0.114121411 |
| 0.001685622 | 5.534168194 | 0.001857645 | 2.008751032 | 1.006100377 |
| 0.274313015 | 3.205233815 | 0.323713579 | 3.183975207 | 0.185029002 |
| 2.03941472  | 4.440767872 | 0.008721356 | 0.008904005 | 1.02844249  |
| 0.246911588 | 3.455605721 | 0.289356446 | 4.750420729 | 0.168569707 |
| 0.012333133 | 2.063166541 | 0.013627641 | 3.070111496 | 2.377747381 |
| 0           | 1.766896529 | 0           | 0.826495756 | 0.837046948 |
| 1.282913039 | 2.979324229 | 0.084590161 | 1.92785759  | 0.055874737 |
| 8.621731776 | 3.79269851  | 8.558869456 | 2.700989201 | 2.235039257 |
| 2.380850625 | 4.667754134 | 0           | 2.373033259 | 0           |
| 0.039577847 | 4.935850192 | 0.04402857  | 3.543736661 | 1.744793177 |
| 0           | 4.363285494 | 0           | 3.779320232 | 0           |
| 0           | 4.178742623 | 0           | 0           | 0           |
| 0.057319321 | 2.618091924 | 0.064047079 | 0.065569267 | 1.197846436 |
| 0.18244904  | 2.835710527 | 0.21035511  | 4.814898107 | 0.128295595 |
| 1.446542231 | 2.57663122  | 0.138172408 | 3.191525079 | 1.398775932 |
| 0           | 4.962342372 | 0           | 1.181106734 | 0           |
| 2.427834554 | 1.267399221 | 0           | 4.379119449 | 0.755576793 |
| 0           | 0           | 0.950847909 | 3.039743947 | 0           |
| 1.100749948 | 3.148022834 | 0.029015825 | 4.475008844 | 0.019914225 |
| 0           | 5.304367997 | 0           | 1.956209267 | 0.969492141 |
| 0.001248708 | 6.434174004 | 0.001375994 | 2.32870593  | 2.005595456 |
| 2.270170164 | 1.845422984 | 0.063684873 | 2.885463261 | 1.196795515 |
| 0           | 2.159180796 | 0           | 6.428277474 | 4.375964208 |
| 2.488403322 | 4.334571387 | 0           | 0           | 0           |
| 0.965855683 | 4.033434327 | 0           | 2.949265994 | 0.968206951 |
| 1.22008249  | 4.729216662 | 0.064953174 | 1.223773227 | 0.043478266 |
| 0.282686404 | 3.599027996 | 0.334306377 | 0.346916173 | 0.189985169 |
| 0.855396866 | 1.408044289 | 0           | 1.405899503 | 0           |
| 2.208651248 | 3.454479715 | 0           | 5.510468809 | 0.922031045 |
| 0.861934717 | 4.417409836 | 0.8611206   | 1.414069195 | 0           |
| 1.656565291 | 4.82607833  | 0           | 1.641446417 | 1.485436367 |
| 0.021978866 | 3.449326202 | 0.024343932 | 0.02487315  | 0.016763271 |
| 2.342911207 | 3.023368946 | 0.004451496 | 1.015865506 | 0.003109415 |
| 0.023760797 | 6.979360553 | 0.026329243 | 1.696864291 | 1.084369728 |
| 0           | 3.983517609 | 0           | 3.373670577 | 2.065382359 |
| 0           | 5.137800344 | 0.636208626 | 2.863198379 | 0           |
| 0.09186507  | 3.664105359 | 0.103535543 | 1.998686886 | 1.308248669 |
| 1.07074082  | 6.909854809 | 0           | 0.755694276 | 2.003947139 |
| 0.787804022 | 5.546238341 | 0           | 1.320966419 | 1.742596525 |
| 1.546451025 | 4.01284719  | 0           | 2.080511313 | 1.197793334 |
| 0           | 4.027400697 | 1.880797839 | 0           | 1.486684493 |

|             |             |             |             |             |
|-------------|-------------|-------------|-------------|-------------|
| 0.051666792 | 4.54844362  | 1.199456717 | 0.059001255 | 0.038783475 |
| 1.992509438 | 5.763499366 | 0           | 0.60502696  | 1.494464432 |
| 0.096422234 | 1.360650152 | 1.366105044 | 2.01801685  | 0.070718191 |
| 4.842686438 | 3.71347379  | 0           | 1.503869062 | 3.087496077 |
| 0.06542009  | 2.657781243 | 0.07324625  | 7.176553267 | 0.048753381 |
| 0.030655631 | 4.991869624 | 0.034027539 | 1.728636705 | 0.023271379 |
| 1.078965627 | 1.078439501 | 0.022641485 | 4.368251176 | 0.015609865 |
| 1.643475868 | 2.073436248 | 0           | 1.867818679 | 0           |
| 0.339318786 | 5.403608537 | 0.407120761 | 4.827916171 | 0.222654818 |
| 0.086781387 | 3.464219106 | 0.097681948 | 4.866717281 | 0.063961382 |
| 1.085240876 | 2.930989586 | 2.112164527 | 2.43938381  | 0.016849876 |
| 1.30178716  | 5.461341779 | 0.09058847  | 3.894364538 | 1.272937266 |
| 0.019374727 | 4.364694398 | 0.021445721 | 1.075685172 | 1.06905479  |
| 0.189198032 | 4.775957204 | 0.218507968 | 2.855213538 | 0.132620218 |
| 1.057270657 | 1.654369533 | 0.01634891  | 2.401102789 | 0.011322329 |
| 0.971137619 | 2.543381489 | 0           | 0.970923806 | 0           |
| 2.323621051 | 3.549051062 | 0.07742273  | 2.673816753 | 0.051387797 |
| 0.632753379 | 4.264808357 | 0           | 2.024750731 | 0           |
| 0           | 4.43178908  | 0           | 0.98252081  | 0.983873393 |
| 0.0806627   | 1.948533235 | 0.090656153 | 3.229895296 | 0.059638968 |
| 0.121766954 | 4.107255635 | 0.138266596 | 3.422705726 | 0.08817628  |
| 0.541869578 | 6.467904001 | 0           | 1.003103253 | 1.404048792 |
| 2.131720361 | 4.325988021 | 0           | 1.196893402 | 2.749556384 |
| 2.776597637 | 4.448696928 | 0           | 1.403084564 | 1.080936847 |
| 2.61031444  | 2.998230355 | 0.158229817 | 5.307280622 | 0.099640016 |
| 0           | 4.819578479 | 0           | 0           | 1.462936516 |
| 2.436362833 | 2.460051622 | 0.107727735 | 0.110528992 | 1.319505176 |
| 2.302656836 | 3.15339712  | 0.071987352 | 1.24707854  | 1.220704338 |
| 1.066527679 | 5.234951033 | 0.019027136 | 3.558874704 | 1.656341839 |
| 3.053485269 | 5.06128124  | 0.010936161 | 2.863085022 | 0.007603287 |
| 0.709681577 | 3.110982357 | 0           | 4.511836428 | 1.948935892 |
| 0           | 1.487134809 | 0           | 4.45788967  | 0           |
| 2.536579219 | 0           | 0.964576348 | 2.755872569 | 0           |
| 0.025633658 | 1.70441811  | 0.028417751 | 5.360872525 | 0.019512014 |
| 1.972807945 | 2.554696537 | 0           | 2.776595934 | 0           |
| 0.097646454 | 4.539819393 | 0.110210476 | 2.46869545  | 0.071571538 |
| 0.082483987 | 2.400809212 | 0.09274522  | 3.903679234 | 0.060928373 |
| 0.009957727 | 1.038346077 | 0.010996437 | 4.451843488 | 1.03578013  |
| 2.880182829 | 5.987742037 | 0           | 0           | 1.068161419 |
| 0.629760204 | 2.968649312 | 0           | 1.776436476 | 0.645822638 |
| 0.028861018 | 1.110364133 | 0.032021266 | 5.755030449 | 0.021930293 |
| 5.263365489 | 5.151756601 | 4.306867854 | 2.171560215 | 0.97808329  |
| 3.519753964 | 5.401606468 | 0.077759943 | 2.340172495 | 2.611423607 |
| 0           | 5.128651796 | 0           | 2.770612063 | 1.292533292 |
| 0.075843854 | 4.67847453  | 0.085137898 | 3.870639728 | 1.257818555 |
| 0.042900619 | 4.776971275 | 0.047764421 | 2.814205536 | 1.14987592  |
| 1.605154761 | 3.610896598 | 2.022342369 | 2.831870099 | 2.605093158 |
| 0           | 3.019724596 | 0           | 2.662012925 | 0.908160048 |
| 0.67366468  | 5.261161325 | 0           | 2.301976501 | 0           |
| 0           | 4.744608639 | 0           | 2.426324042 | 0           |
| 2.752865543 | 1.90030355  | 0           | 2.916129809 | 1.539554689 |
| 0.047551478 | 2.569585857 | 0.053003806 | 3.432362722 | 0.035772311 |
| 0           | 5.890531939 | 0           | 3.618814406 | 0.950637462 |
| 0           | 0.978837987 | 0           | 5.175810323 | 0           |
| 0           | 4.528869916 | 1.455091384 | 0.894258806 | 0.90143908  |
| 1.209620994 | 3.089253163 | 0.696633652 | 2.525677808 | 2.910214103 |
| 0.034128115 | 2.996108937 | 0.037914639 | 4.519633066 | 0.025858997 |
| 0           | 5.129289965 | 0           | 0.803621491 | 0           |

| hsa-miR-509-3-5p | hsa-miR-3922-3p | hsa-miR-7-5p | hsa-miR-496 | hsa-miR-520g-5p |
|------------------|-----------------|--------------|-------------|-----------------|
| 0.091914325      | 2.403495055     | 1.337899467  | 3.05302531  | 0.071695246     |
| 1.224999206      | 1.220342481     | 2.280024463  | 0.069714786 | 0.04743608      |
| 0.029078812      | 2.952667512     | 2.466955814  | 2.967019522 | 0.023312016     |
| 1.058228974      | 2.884584037     | 1.058074188  | 1.656039388 | 0.012232132     |
| 0.099306119      | 1.995548087     | 1.363691495  | 3.317937127 | 0.077218505     |
| 2.530655978      | 0.039068722     | 2.200670986  | 1.161144856 | 0.033646022     |
| 0.132554126      | 1.466512799     | 0.130290583  | 1.490879388 | 0.101650075     |
| 0.018150206      | 2.086367037     | 1.069400743  | 3.425969097 | 0.014622244     |
| 0                | 0               | 0.927504391  | 3.693649755 | 0               |
| 0.039751556      | 2.512182257     | 3.20403705   | 2.19802547  | 0.031717245     |
| 0                | 2.928765855     | 5.088590894  | 0           | 0               |
| 0.183516626      | 0.166085978     | 1.644876571  | 2.364448751 | 0.137859185     |
| 0.091395049      | 2.734115662     | 1.975770276  | 1.992679801 | 0.071305952     |
| 0                | 0               | 3.296114971  | 2.558839031 | 0               |
| 0.156711571      | 3.481769667     | 4.033515921  | 2.718746059 | 0.118994841     |
| 1.135628086      | 1.133127728     | 0.035200653  | 1.74995808  | 0.028539541     |
| 0                | 3.685959975     | 0.562021226  | 4.829709703 | 0               |
| 0.751157262      | 0.756630361     | 2.849805753  | 4.077306088 | 0               |
| 0.067221275      | 2.633397949     | 0.066206927  | 3.16295691  | 0.052993143     |
| 0.198688257      | 0.179399727     | 2.369342628  | 2.422892312 | 0.14836531      |
| 0.145025229      | 0.132034643     | 1.51912203   | 3.526099553 | 0.110645792     |
| 0.233034644      | 0.209320771     | 1.800453582  | 0.287781098 | 0.171712482     |
| 1.091233343      | 1.690838902     | 2.115676701  | 2.120482787 | 0.019179233     |
| 0.122062649      | 0.111529705     | 1.441918044  | 2.120041092 | 0.094012118     |
| 0.120950095      | 2.515893276     | 0.118927062  | 0.143565456 | 0.093198346     |
| 0                | 0               | 2.352066749  | 3.085027492 | 0               |
| 0                | 2.557085264     | 2.293925513  | 1.972100193 | 0               |
| 0.051907054      | 0.0479629       | 0.051148239  | 1.822265362 | 0.041194601     |
| 0.071318749      | 0.065693218     | 1.265008049  | 2.346608201 | 0.056123699     |
| 0.033558971      | 1.732415149     | 1.735683223  | 1.740268286 | 0.026849994     |
| 0                | 2.021071713     | 2.346451951  | 5.94436245  | 0               |
| 1.99961469       | 0.999706173     | 0.999702371  | 3.169477464 | 0               |
| 0                | 1.366463107     | 0.540217994  | 0.544023959 | 0               |
| 0                | 2.652607661     | 1.678584619  | 2.627363982 | 0               |
| 0.08068317       | 1.292705398     | 2.369099524  | 1.303797153 | 0.06323741      |
| 0.222242885      | 0.199951878     | 2.901660776  | 0.273395579 | 0.164440613     |
| 0.105414788      | 2.018485785     | 1.384863044  | 6.551062108 | 0.081757451     |
| 0                | 0.817400692     | 1.755540301  | 6.336255682 | 0               |
| 1.890889187      | 0.064420352     | 0.068860271  | 0.081542882 | 0.055057137     |
| 2.089718102      | 1.66661283      | 3.096604887  | 2.90900179  | 0.014745811     |
| 0.083619161      | 0.076871463     | 1.944790301  | 2.402704598 | 0.065456143     |
| 0.055326598      | 1.203814582     | 3.603324782  | 4.217673787 | 0.043842682     |
| 0.105054752      | 2.017140375     | 2.029298477  | 4.141548776 | 0.081490568     |
| 0.049983228      | 2.229382785     | 1.187842435  | 4.283062074 | 1.175877606     |
| 0                | 2.911206442     | 2.716931494  | 7.313603051 | 0               |
| 0                | 2.222382843     | 1.494065801  | 1.49231767  | 0               |
| 1.483361599      | 3.396544123     | 2.582463631  | 1.494738841 | 0.102436878     |
| 0.156693017      | 1.543987596     | 1.557713244  | 2.718669124 | 0.118981647     |
| 0.094682284      | 1.978027889     | 1.988754604  | 2.452370915 | 0.073767496     |
| 0                | 0               | 0.863956616  | 6.251569804 | 0               |
| 0.002262866      | 1.595221896     | 2.596876147  | 3.012968479 | 1.008271642     |
| 0                | 2.651617982     | 2.077253249  | 2.271050594 | 0               |
| 3.038475305      | 0.041999185     | 0.044750278  | 0.0525088   | 0.036137588     |
| 0.017974406      | 0.016700964     | 1.666834714  | 2.907201851 | 0.014481762     |
| 0.012100673      | 0.011254256     | 1.046424179  | 2.386461218 | 0.009775266     |
| 0.770849753      | 0.773162239     | 1.303788769  | 6.763035452 | 5.729437067     |

|             |             |             |             |             |
|-------------|-------------|-------------|-------------|-------------|
| 0.592886623 | 1.079548161 | 1.730852084 | 2.901735471 | 0           |
| 0           | 0.86634572  | 0.864960401 | 0           | 0           |
| 0           | 3.252305082 | 2.366792831 | 0           | 0           |
| 0.6672738   | 1.855627712 | 2.941639975 | 6.590756212 | 0           |
| 2.737126307 | 1.111241574 | 2.960511082 | 1.114001513 | 0.023822611 |
| 2.092669332 | 0           | 0.834525779 | 2.558154972 | 0           |
| 0           | 0.68506799  | 2.333343445 | 2.105082832 | 0           |
| 2.625743126 | 1.619917711 | 2.625493438 | 3.630476497 | 0.006275762 |
| 0           | 1.554604431 | 1.966736549 | 3.131086982 | 0           |
| 0.055435548 | 1.20420236  | 0.054619127 | 1.837817973 | 0.043926924 |
| 0.051499857 | 1.807375262 | 1.193385048 | 1.820466195 | 0.040878745 |
| 0.985560831 | 0.985774667 | 3.564305998 | 4.299273761 | 0           |
| 0           | 1.978320361 | 0.982831771 | 1.563878767 | 0           |
| 0           | 0.576805866 | 0           | 2.615244397 | 0           |
| 0           | 2.71257246  | 3.484368002 | 1.907027311 | 0           |
| 0.047537935 | 0.043956945 | 1.178887157 | 1.802913014 | 0.03779969  |
| 1.581063749 | 1.563492148 | 0.159942471 | 1.597866812 | 0.123365087 |
| 0.001702734 | 2.816194304 | 1.592836588 | 3.710554054 | 0.001382034 |
| 0.278913687 | 1.907675558 | 0.272946936 | 3.198332631 | 0.202003036 |
| 0.007983004 | 1.620944513 | 2.362753486 | 3.04545296  | 0.006460949 |
| 0.250892157 | 0.224759611 | 2.54185398  | 3.446485504 | 0.183620692 |
| 1.047924476 | 1.640876229 | 2.385312266 | 0.01425065  | 0.010065185 |
| 0           | 0.828737607 | 2.083101997 | 0           | 0           |
| 1.28372146  | 1.906851344 | 1.282661977 | 3.207485311 | 0.059889861 |
| 0.927772243 | 1.499396298 | 5.776105267 | 2.480258844 | 0           |
| 0           | 0           | 1.408738236 | 3.576919604 | 0           |
| 1.15166478  | 0.0370477   | 2.519022368 | 3.927654953 | 0.031925125 |
| 0.981725304 | 2.782685945 | 0.981767722 | 1.975626685 | 0           |
| 0           | 1.428073319 | 1.42552033  | 3.378640673 | 0           |
| 0.057980125 | 1.213244465 | 1.216967773 | 2.618440438 | 0.04589216  |
| 1.653716667 | 1.632628441 | 1.649984026 | 1.675392103 | 0.138967414 |
| 1.448112345 | 2.084255882 | 1.446057963 | 0.146451304 | 0.094902589 |
| 0           | 2.336262266 | 1.56285401  | 2.491863432 | 0           |
| 0           | 1.271545505 | 1.654008382 | 2.199432989 | 0           |
| 0           | 2.381547698 | 3.074541562 | 0           | 0           |
| 0.026451221 | 0.024543019 | 0.026085363 | 1.101576117 | 1.094824304 |
| 0           | 0           | 0.967249922 | 1.544712535 | 0           |
| 0.001261371 | 1.00480587  | 0.001244914 | 3.466855498 | 0.001024006 |
| 0.057656367 | 0.053225741 | 2.868664669 | 2.283152667 | 0.045642355 |
| 0           | 4.081868958 | 2.423554902 | 2.158449059 | 0           |
| 0.781046973 | 1.320413024 | 1.708378108 | 3.453553951 | 0           |
| 0           | 0           | 1.543897681 | 2.535654054 | 0           |
| 0.058789835 | 2.267214523 | 2.274781697 | 3.490201669 | 0.046516612 |
| 1.971618923 | 0.256149757 | 2.656788698 | 3.230283958 | 0.207553061 |
| 0           | 0           | 1.409000562 | 1.406238006 | 0           |
| 2.880293406 | 2.211436797 | 1.891253769 | 2.204274177 | 0           |
| 0.8617435   | 1.419739381 | 0.861995857 | 3.779176899 | 0           |
| 0           | 1.166343166 | 1.657172167 | 3.939975448 | 0           |
| 0.022213057 | 1.08352187  | 2.107848442 | 3.124498279 | 0.017862698 |
| 0.004078144 | 2.019734082 | 1.015715743 | 2.607518281 | 0.003306465 |
| 0.024015025 | 1.691475788 | 1.091530358 | 4.53362087  | 0.019296144 |
| 1.333146693 | 3.024312081 | 2.037120587 | 2.999091778 | 0           |
| 0           | 2.767161674 | 1.502480582 | 4.323900246 | 4.113601901 |
| 0.093002085 | 1.334932878 | 1.982126194 | 1.348737038 | 0.072510176 |
| 0.754614766 | 0.760108966 | 0.755377649 | 3.479022333 | 0           |
| 1.324062628 | 2.03270383  | 2.49875976  | 4.554488623 | 0           |
| 0           | 3.296466191 | 2.493442207 | 2.635693651 | 0           |
| 1.883454116 | 0.912127606 | 2.201178623 | 2.675239573 | 0           |

|             |             |             |             |             |
|-------------|-------------|-------------|-------------|-------------|
| 0.052255233 | 0.048281895 | 1.815834483 | 2.590489527 | 0.041464589 |
| 0           | 1.462247489 | 0.604180597 | 4.944259582 | 0           |
| 0.09762641  | 2.426099378 | 5.432141114 | 1.365520761 | 0.075966387 |
| 0           | 1.246964305 | 1.951658697 | 3.66295014  | 0           |
| 1.247485232 | 2.298453877 | 2.307089488 | 0.077089505 | 3.097333126 |
| 0.030988863 | 1.115882988 | 1.117660861 | 4.08576161  | 0.024822101 |
| 1.079131411 | 1.077782758 | 1.078913564 | 1.079541353 | 0.016630734 |
| 1.641914833 | 1.008174557 | 2.710966431 | 1.631844977 | 0           |
| 2.141322032 | 0.305290794 | 2.131558116 | 2.217783401 | 0.244304622 |
| 0.087844672 | 0.080701427 | 0.086463687 | 4.057949973 | 0.06863974  |
| 1.686707873 | 1.083952754 | 1.686267332 | 2.112863611 | 0.01795522  |
| 0.081579045 | 0.075020486 | 1.936599384 | 3.430965949 | 0.063915008 |
| 0.01957992  | 3.27042932  | 1.07480858  | 2.915935215 | 0.015763904 |
| 0.191986868 | 2.3207443   | 2.346395104 | 1.699223874 | 0.143739637 |
| 0.014941836 | 0.013890178 | 2.073121643 | 1.655013826 | 0.012054939 |
| 1.550138916 | 0           | 4.127999012 | 0           | 0           |
| 0.069903652 | 2.313967499 | 1.889207283 | 1.900900399 | 0.055043775 |
| 0.632475502 | 1.131374857 | 1.126326613 | 4.010099296 | 0.644004029 |
| 0           | 0.98288143  | 0.982665707 | 2.974142426 | 0           |
| 1.302884812 | 1.296003527 | 2.706310709 | 0.095593064 | 1.280314738 |
| 1.448391983 | 1.436462806 | 2.542551749 | 2.125354966 | 0.094962324 |
| 0.541617593 | 1.657985202 | 0           | 4.927032608 | 0           |
| 0           | 2.542909237 | 1.882052024 | 3.295226007 | 0           |
| 0           | 0.57754327  | 1.050421809 | 3.268252132 | 0           |
| 0.140631587 | 0.128122435 | 1.504480229 | 2.651495598 | 0.107486777 |
| 1.45125606  | 2.175451839 | 0.890126471 | 3.001561892 | 0           |
| 1.356040223 | 1.98564647  | 0.095142405 | 1.362120306 | 0.075266456 |
| 2.635804149 | 0.059994037 | 0.064088416 | 1.246323605 | 0.051342004 |
| 0.017380198 | 0.016150433 | 1.664171278 | 3.421643087 | 0.014006767 |
| 0.010005835 | 0.009309166 | 2.860243378 | 3.227359058 | 0.008090672 |
| 0           | 4.016442797 | 1.225769856 | 2.855970237 | 0           |
| 0           | 0           | 1.487999959 | 1.892155905 | 0           |
| 0           | 0           | 0           | 0.964781959 | 0           |
| 0.025909113 | 1.09719437  | 2.125294359 | 1.099515187 | 0.020800387 |
| 0           | 0           | 0           | 1.971895942 | 0           |
| 0.098868843 | 1.993897078 | 1.362171029 | 2.024091983 | 0.076892712 |
| 0.083485926 | 1.302366763 | 2.714257295 | 3.440270994 | 0.065355576 |
| 0.010060861 | 0.009360275 | 1.038642148 | 1.038884911 | 0.008134963 |
| 0           | 1.695850292 | 2.48050401  | 3.819742675 | 0           |
| 0           | 2.257632765 | 2.430735194 | 2.716094063 | 3.780847421 |
| 0.02917346  | 1.109217597 | 2.957777593 | 1.111912573 | 0.023386905 |
| 0.945032955 | 2.370050786 | 5.383358458 | 4.129420463 | 1.613712024 |
| 0.070203446 | 1.256294606 | 2.656453838 | 4.713435202 | 0.05527267  |
| 0           | 1.535470848 | 0.468470948 | 3.6745873   | 0           |
| 0.076752774 | 0.070636886 | 1.91711633  | 3.735627675 | 0.060258563 |
| 0.04337994  | 0.04013931  | 2.801987871 | 3.042130676 | 0.034556777 |
| 1.016892416 | 2.34381631  | 1.016850621 | 0.004987545 | 3.92830721  |
| 0           | 1.468170667 | 2.188450824 | 2.441977969 | 0           |
| 0           | 1.563248736 | 1.179459634 | 3.620363029 | 0.684395076 |
| 0           | 2.637333149 | 1.277107975 | 3.67586813  | 0           |
| 0.872507163 | 0.878565791 | 2.856735382 | 1.20387967  | 0           |
| 0.048088221 | 3.04172851  | 1.798192295 | 0.055662923 | 1.169461382 |
| 0.946983583 | 2.252239987 | 0.947098802 | 3.82396305  | 0           |
| 0.978575551 | 0.978889346 | 1.559274469 | 2.291983954 | 0           |
| 0           | 0.895966554 | 1.862308849 | 2.650575697 | 3.668538995 |
| 0.696972515 | 3.625455911 | 2.543388726 | 3.090230369 | 0           |
| 0.034502024 | 1.128739266 | 2.492931073 | 1.744530258 | 3.74545587  |
| 0           | 1.348695841 | 1.345191157 | 3.850796233 | 2.070660543 |

| hsa-miR-409-5p | hsa-miR-147b-3p | hsa-miR-376c-5p | hsa-miR-382-3p | hsa-miR-539-5p |
|----------------|-----------------|-----------------|----------------|----------------|
| 5.764380551    | 1.950496515     | 2.415621924     | 3.283739642    | 4.593713751    |
| 2.627543484    | 0.049972038     | 1.224111727     | 2.294118484    | 1.855499505    |
| 4.419500012    | 1.105752368     | 2.140038693     | 2.14614318     | 4.076692918    |
| 4.550833536    | 1.055717619     | 0.014930088     | 3.409280933    | 2.667793974    |
| 6.747384319    | 0.081620641     | 2.445950191     | 3.517376478    | 6.486957959    |
| 0.050591077    | 0.035389028     | 0.041526251     | 0.049060991    | 1.158886413    |
| 2.158463964    | 1.447891194     | 2.133295503     | 3.239730697    | 3.241593234    |
| 4.917134697    | 1.066545891     | 1.667571471     | 4.194588143    | 4.917085539    |
| 4.467746577    | 0.929989399     | 1.905632083     | 3.210475552    | 4.740148327    |
| 1.766303652    | 1.143433253     | 0.039106526     | 1.151659564    | 3.391835954    |
| 1.94448078     | 0               | 0               | 0.586291501    | 1.420036814    |
| 5.109986367    | 1.599483691     | 2.316340677     | 3.694083671    | 5.263982002    |
| 4.198301181    | 0.075321021     | 2.413476256     | 3.051220818    | 3.051794296    |
| 6.099726204    | 0.98254862      | 1.563206012     | 4.43076896     | 5.328210032    |
| 4.261570139    | 2.171047174     | 2.66895226      | 3.066642175    | 4.119482188    |
| 6.021326984    | 1.129215446     | 1.135159411     | 2.178466716    | 3.52380284     |
| 6.712238474    | 0               | 3.092030915     | 4.537995383    | 6.964888492    |
| 5.931034398    | 0               | 3.294989728     | 4.626529171    | 5.355951684    |
| 4.774400639    | 1.23775563      | 3.333276547     | 3.360523407    | 4.284054167    |
| 3.527792463    | 1.642751275     | 0.194379372     | 0.244463804    | 3.528087058    |
| 4.337337535    | 1.485920443     | 2.179278796     | 3.016539179    | 4.455531011    |
| 3.383817862    | 0.183384639     | 0.227713795     | 0.290435118    | 3.907884       |
| 3.597026846    | 0.020139307     | 0.023494012     | 1.091609769    | 1.090456898    |
| 3.19385875     | 0.099558021     | 1.44162632      | 2.916041644    | 2.916198082    |
| 4.095904915    | 0.09868732      | 2.532536719     | 3.187666102    | 3.622181165    |
| 6.150458742    | 2.378706362     | 3.330140271     | 2.334699638    | 4.560328715    |
| 1.972307946    | 0.979901413     | 0.979141974     | 2.554853443    | 2.968812598    |
| 4.102168901    | 2.226990902     | 1.194777581     | 3.08631332     | 4.824014427    |
| 5.869312666    | 0.059182426     | 0.070082704     | 2.682869115    | 3.711344664    |
| 4.283598676    | 0.02821894      | 0.033021737     | 1.128330689    | 2.496909683    |
| 8.155765052    | 2.389550949     | 4.038615083     | 6.306534723    | 6.333682082    |
| 4.754411247    | 0.999713601     | 0.999702477     | 2.321512082    | 2.321513658    |
| 6.350606166    | 1.019995899     | 2.580501492     | 2.680978371    | 4.125704639    |
| 4.182174591    | 2.666945488     | 2.455931241     | 3.311254703    | 2.940403878    |
| 5.545032648    | 1.282635128     | 0.079258541     | 1.947105606    | 4.619988321    |
| 4.404674142    | 0.175482531     | 0.217248192     | 0.275864124    | 3.625751846    |
| 9.094315833    | 0.086462265     | 4.59703125      | 6.160533934    | 8.225952776    |
| 9.261272317    | 0               | 3.529847459     | 7.182977629    | 8.962250353    |
| 1.898024237    | 1.246825723     | 0.068712732     | 2.676202601    | 3.549131441    |
| 4.633647904    | 0.015476039     | 0.018021681     | 4.35635202     | 4.75417497     |
| 4.041700256    | 0.069096308     | 1.308551819     | 3.24387632     | 3.443477354    |
| 4.315122052    | 0.046167648     | 0.054398612     | 2.605710966    | 4.221048177    |
| 3.878673127    | 1.361750951     | 0.10311115      | 2.049847544    | 4.019592346    |
| 5.994923047    | 1.179006419     | 1.806075604     | 4.371845027    | 5.848474665    |
| 10.43064906    | 0               | 4.490394861     | 7.802263971    | 10.25880403    |
| 5.920298586    | 2.900679621     | 0.924805636     | 1.898933267    | 4.127318489    |
| 2.620474638    | 1.451227333     | 0.131036253     | 2.622407358    | 2.163590205    |
| 3.961917364    | 1.520940119     | 1.557295905     | 3.578937138    | 4.509009843    |
| 4.214687634    | 2.993192622     | 0.092964513     | 1.354393139    | 2.451052243    |
| 8.812473186    | 0.868216057     | 4.044424479     | 5.841525015    | 9.407713975    |
| 4.537440228    | 3.011263413     | 1.595415376     | 3.01298259     | 4.183674444    |
| 4.444863537    | 2.318666372     | 2.475170869     | 2.894647449    | 4.159190977    |
| 4.909253991    | 0.038020505     | 0.044659152     | 4.165352677    | 4.167381992    |
| 5.467130613    | 1.065909978     | 1.068707772     | 5.014546536    | 5.753659503    |
| 4.465412332    | 0.010253454     | 0.01191613      | 2.875062827    | 3.771915033    |
| 8.360327636    | 0               | 4.600304254     | 7.312369686    | 8.577402451    |



|             |             |             |             |             |
|-------------|-------------|-------------|-------------|-------------|
| 4.942908084 | 0           | 3.425679942 | 3.54395647  | 5.12716214  |
| 1.42000404  | 0           | 0           | 2.130013205 | 2.605294314 |
| 3.10033588  | 0.710726383 | 0           | 2.534251405 | 2.84510504  |
| 6.777282777 | 0           | 3.382087925 | 5.630190667 | 8.217714285 |
| 4.173995142 | 1.711144127 | 0.029252454 | 2.970635715 | 3.16577769  |
| 5.394688349 | 0           | 2.351030051 | 2.91347301  | 4.187480263 |
| 4.970795758 | 1.205018162 | 1.569623534 | 3.064079551 | 2.663143959 |
| 4.21672576  | 0.006580094 | 1.620593232 | 2.627706625 | 3.853583385 |
| 4.129157496 | 0           | 0           | 2.285870797 | 5.243723818 |
| 4.964404296 | 1.813841116 | 2.259758054 | 1.210291284 | 3.301537606 |
| 3.281059446 | 0.043031991 | 0.050642959 | 2.856983712 | 3.608506049 |
| 5.783927489 | 0           | 3.301444156 | 2.78616417  | 6.368824332 |
| 5.016698197 | 0.98346559  | 0           | 1.977056695 | 3.673730218 |
| 5.43720546  | 0           | 1.049588131 | 4.413025429 | 4.986454995 |
| 5.096362239 | 2.495507117 | 0.930810046 | 2.704700758 | 5.410104269 |
| 2.233989524 | 3.027146231 | 0.046753561 | 1.802802566 | 2.566838895 |
| 5.376272892 | 0.131065908 | 1.577539418 | 2.284008227 | 4.289172422 |
| 5.098021199 | 3.178449869 | 3.009183075 | 3.009775239 | 5.13984214  |
| 2.720667503 | 0.21642289  | 2.628941029 | 2.723515041 | 4.092936567 |
| 6.509111328 | 0.006774407 | 1.030685352 | 3.954358418 | 5.541167624 |
| 4.364531835 | 0.196349641 | 1.854136244 | 1.900521859 | 0.329461064 |
| 1.642861109 | 1.045883768 | 0.01227139  | 2.653328975 | 2.877046643 |
| 3.186070941 | 0.832202187 | 0           | 1.765304303 | 0.829690937 |
| 3.581081779 | 0.063180759 | 1.914892673 | 3.579210742 | 4.230175471 |
| 3.347584319 | 0           | 0.927945906 | 2.48021534  | 3.972535697 |
| 5.402142386 | 0.859721945 | 0           | 3.470631952 | 4.155920596 |
| 6.019935375 | 0.033572365 | 2.190502789 | 4.03584748  | 6.096465458 |
| 6.310073357 | 1.564179085 | 0           | 3.878444947 | 5.725248134 |
| 6.0285326   | 0           | 2.142378793 | 4.541229223 | 5.847114625 |
| 3.117497457 | 1.206442829 | 2.601595594 | 1.848875694 | 2.283450048 |
| 4.636522777 | 0.14789313  | 1.649450756 | 1.674854773 | 4.087301478 |
| 3.432412163 | 0.100510963 | 1.445762122 | 1.457312452 | 3.432625366 |
| 3.844125415 | 1.199233453 | 1.185351652 | 2.801117646 | 4.091707151 |
| 2.414009141 | 0.749028307 | 0           | 0           | 1.95136063  |
| 0           | 0           | 0           | 0           | 0           |
| 4.155403778 | 0.02229847  | 1.100638915 | 2.461136812 | 3.472941763 |
| 5.877227818 | 0           | 2.539936178 | 3.27192912  | 3.948312869 |
| 5.562458876 | 0.001073009 | 2.006263182 | 4.329573678 | 5.095284892 |
| 4.855417345 | 4.79105377  | 1.215686109 | 2.887798553 | 4.132887236 |
| 3.517849714 | 0           | 0           | 0.884792043 | 2.635315679 |
| 5.272242674 | 0           | 1.708532928 | 1.701749356 | 4.800774783 |
| 3.532008688 | 0           | 0.965885638 | 1.543053653 | 2.274233986 |
| 4.65844988  | 0.04899829  | 1.843065117 | 4.725598671 | 5.834023043 |
| 5.065964252 | 0.222497478 | 1.963249852 | 0.365775406 | 4.945233705 |
| 4.286681776 | 0           | 0.855499102 | 0           | 3.232098218 |
| 4.324784183 | 0           | 0           | 0.916648796 | 3.454483034 |
| 6.322995117 | 0.866304212 | 2.610233126 | 4.235518533 | 4.941286745 |
| 5.948660875 | 0           | 2.187992822 | 4.245301756 | 4.75546532  |
| 3.937601869 | 1.680048702 | 1.685687767 | 2.705629432 | 4.131120541 |
| 5.112673934 | 1.015110549 | 1.01571     | 3.724637117 | 3.483475056 |
| 6.622212156 | 0.020262343 | 2.707839316 | 4.897378323 | 6.275379702 |
| 5.954782039 | 1.344226846 | 2.510019113 | 3.574625835 | 4.24410949  |
| 4.850314471 | 1.823863697 | 1.799442439 | 3.196791443 | 4.450304981 |
| 4.975647272 | 0.076603417 | 0.091320206 | 1.348294861 | 4.314982798 |
| 6.923587935 | 1.592102643 | 4.219607024 | 5.624164591 | 6.058814372 |
| 4.730232351 | 0           | 2.281937109 | 4.292273202 | 4.23148747  |
| 4.422233483 | 1.185091173 | 1.546984256 | 3.607277448 | 3.823415268 |
| 4.983659732 | 1.482528432 | 0.911168173 | 2.455514983 | 3.445715546 |

|             |             |             |             |             |
|-------------|-------------|-------------|-------------|-------------|
| 3.612437036 | 0.043651611 | 0.051384383 | 3.284329044 | 3.458070129 |
| 6.69369757  | 1.10421428  | 2.38699231  | 4.4325059   | 5.730793416 |
| 3.312270016 | 0.080285871 | 0.095845284 | 0.115741132 | 3.511676909 |
| 5.696328464 | 0           | 1.95207831  | 3.124016875 | 5.597951551 |
| 3.685006946 | 1.855168598 | 0.065052059 | 2.929968051 | 2.321631796 |
| 5.433697103 | 1.112539636 | 1.724369772 | 4.179739715 | 5.04266001  |
| 4.982711563 | 1.673582543 | 1.67880823  | 3.440246202 | 4.647463775 |
| 3.575654409 | 0           | 0           | 2.406716942 | 2.408591706 |
| 5.405746114 | 0.262883504 | 0.336371103 | 2.218287403 | 5.173454478 |
| 4.39025221  | 1.935737245 | 2.398752026 | 3.264248086 | 4.062911669 |
| 1.084537868 | 1.081613654 | 0.021980661 | 1.689034588 | 2.439528148 |
| 4.849470508 | 0.067457742 | 1.301344623 | 3.760572698 | 4.358308018 |
| 5.163059095 | 0.016546494 | 2.909461132 | 3.572385813 | 4.976250314 |
| 5.794666269 | 0.153050882 | 2.796309465 | 2.863638757 | 4.666244587 |
| 2.401086766 | 2.39241961  | 0.01471246  | 0.017197443 | 3.255523185 |
| 4.041833975 | 2.285691351 | 0           | 0.971094022 | 3.2778175   |
| 4.564123181 | 0.058036546 | 0.068695579 | 1.900785551 | 2.9483059   |
| 5.369502939 | 0.640654614 | 1.497192096 | 5.542949677 | 4.638704643 |
| 5.431316725 | 0.983305518 | 2.561203531 | 2.781844805 | 5.016442425 |
| 3.004974143 | 1.913004029 | 0.080194696 | 1.306892092 | 3.005223109 |
| 4.748539404 | 1.419456617 | 2.541993259 | 3.430381703 | 3.433001826 |
| 6.354335553 | 0.550083465 | 1.361409268 | 5.658268907 | 6.243065675 |
| 4.673765093 | 0.697804633 | 0.690543933 | 3.726888296 | 3.567410867 |
| 5.379420307 | 0           | 1.411652753 | 4.634599546 | 4.78962952  |
| 5.884653696 | 0.113997479 | 2.608583653 | 3.275510251 | 5.272449945 |
| 5.88340595  | 1.457872729 | 2.172133069 | 3.527242419 | 4.405985896 |
| 3.681989724 | 0.079539898 | 0.094927601 | 0.114590242 | 1.357206462 |
| 2.316114726 | 1.230489641 | 1.242446011 | 1.879811663 | 0.078576541 |
| 4.10317333  | 2.668040956 | 1.066458262 | 2.904058374 | 3.802480425 |
| 4.645823696 | 0.008484799 | 2.637071327 | 3.379914966 | 5.616277438 |
| 4.149979352 | 4.163217802 | 1.225898498 | 2.35987803  | 3.516390311 |
| 3.198296674 | 0           | 0.919829133 | 2.468281107 | 3.459487691 |
| 2.947454677 | 0           | 0.964913094 | 2.272669785 | 3.116710309 |
| 2.457824801 | 2.117023829 | 0.025501332 | 0.029936568 | 2.45794194  |
| 3.966899027 | 1.560993524 | 0           | 1.559167551 | 3.427086917 |
| 5.191429207 | 1.341923786 | 2.444167125 | 3.086275431 | 4.79107202  |
| 4.368136499 | 0.068989366 | 0.082003682 | 2.402272657 | 4.267052837 |
| 1.631785444 | 0.008531291 | 0.009908154 | 1.03882515  | 1.03833758  |
| 6.832679961 | 1.053326258 | 1.686349323 | 4.544827457 | 4.769416293 |
| 5.016086896 | 0.637680441 | 0.62990989  | 2.227129513 | 3.279947214 |
| 1.718973671 | 0.024569505 | 0.028710941 | 0.03374747  | 2.145831795 |
| 6.266425648 | 2.052246466 | 2.015219459 | 4.95609093  | 4.563025578 |
| 6.077057267 | 0.058279397 | 2.925194979 | 3.178258762 | 3.705652377 |
| 5.970066352 | 0.923050709 | 3.004131007 | 4.56732195  | 4.758440602 |
| 5.342873999 | 1.26962064  | 2.352131835 | 2.981378583 | 5.524121112 |
| 4.42134573  | 1.156109304 | 0.042670504 | 2.215489623 | 3.238687246 |
| 5.860132585 | 1.016200796 | 0.004307861 | 2.832031852 | 3.833535551 |
| 3.750788297 | 0           | 1.466241771 | 3.652513669 | 2.442330185 |
| 6.053859491 | 1.575630298 | 3.189216977 | 3.361825236 | 4.478911303 |
| 5.614509513 | 1.990059646 | 1.66499276  | 3.399379616 | 4.530460342 |
| 4.241633842 | 4.6450768   | 0.444295095 | 1.699901808 | 3.55989197  |
| 2.236598867 | 1.78506466  | 0.04729384  | 1.182903953 | 2.236846417 |
| 6.270524639 | 0           | 0.947115913 | 5.69582127  | 6.707310868 |
| 2.554206559 | 0           | 0           | 0.978574851 | 2.292096426 |
| 6.619078475 | 0           | 1.457531806 | 3.739989155 | 4.078285942 |
| 4.236761081 | 0           | 0.697398367 | 3.404315672 | 3.579807235 |
| 3.517198622 | 2.154150277 | 0.033948548 | 1.131890122 | 3.782780093 |
| 5.667876112 | 0.809752992 | 0           | 3.768575593 | 4.198939593 |

| hsa-miR-3131 | hsa-miR-31-5p | hsa-miR-499a-5p | hsa-miR-3660 | hsa-miR-141-5p |
|--------------|---------------|-----------------|--------------|----------------|
| 0.079726654  | 1.342228579   | 1.345577337     | 0.058103111  | 1.339383183    |
| 0.052462987  | 0.062230886   | 1.857662392     | 0.038798597  | 1.855070573    |
| 0.025641839  | 0.030094974   | 3.973662208     | 0.01924743   | 1.718512281    |
| 1.056486003  | 1.058544265   | 2.66754386      | 0.010143993  | 2.667722328    |
| 0.085974785  | 4.08200699    | 2.025316007     | 0.062450416  | 7.202417312    |
| 0.037095621  | 0.043735486   | 2.808619465     | 0.027667053  | 3.036444296    |
| 0.113793519  | 1.48476523    | 0.154004869     | 0.081475878  | 1.483447134    |
| 0.01605179   | 0.018768232   | 0.020396841     | 0.012114513  | 3.102382873    |
| 1.500280656  | 0             | 1.495558238     | 0            | 3.792038476    |
| 1.755109596  | 0.041175393   | 1.152358643     | 0.026100708  | 3.21938619     |
| 0            | 6.621385784   | 0.583890867     | 0            | 3.190726207    |
| 0.15556126   | 2.789235071   | 0.216448721     | 0.109089894  | 4.510673824    |
| 0.079286839  | 0.095054628   | 3.277098585     | 0.057796043  | 0.111982692    |
| 2.298745642  | 0.981754683   | 0               | 0            | 6.27418995     |
| 4.747877479  | 0.163822202   | 0.183372416     | 0.094787521  | 3.78498823     |
| 0.031429141  | 1.136479512   | 0.04032802      | 0.023515009  | 2.507559295    |
| 0.567142751  | 7.063919118   | 0               | 1.456697239  | 2.593494254    |
| 0            | 0.357175715   | 2.421948201     | 0            | 3.469306659    |
| 0.058682459  | 0.06978007    | 1.889119016     | 0.043251518  | 1.886341997    |
| 0.167799591  | 0.208383251   | 1.722406115     | 0.116978876  | 2.41862212     |
| 0.124110383  | 1.527549118   | 0.169113838     | 0.088399558  | 2.668677171    |
| 0.195186414  | 0.245056861   | 3.647547259     | 0.134322275  | 3.026371615    |
| 3.288340246  | 0.024691837   | 1.092055813     | 0.015861171  | 1.090280394    |
| 0.105065028  | 0.12725598    | 1.454262835     | 2.001639027  | 2.115764058    |
| 0.10413676   | 2.546158358   | 2.565093547     | 0.074931409  | 3.42161402     |
| 0.699084969  | 0.693401053   | 2.124152044     | 0            | 2.683227318    |
| 0            | 0             | 0               | 0            | 3.874141456    |
| 0.045495858  | 0.053817898   | 2.857395033     | 0.033774895  | 4.296695507    |
| 0.06219295   | 0.074057409   | 3.180775142     | 0.045751896  | 2.34486588     |
| 2.153350745  | 0.034743995   | 1.128935614     | 0.022137622  | 4.001676315    |
| 0            | 4.989833628   | 0               | 2.109874289  | 8.401909159    |
| 0            | 0             | 3.169479945     | 0            | 2.584535432    |
| 0            | 1.638596167   | 1.001076145     | 0            | 3.642355703    |
| 0            | 1.981154038   | 0               | 0            | 3.197453894    |
| 0.070188118  | 1.301950817   | 1.304557366     | 0.051412017  | 1.299008498    |
| 0.186628309  | 4.307034952   | 0.26516562      | 0.128947583  | 1.79267357     |
| 3.27217522   | 0.109756486   | 5.849836201     | 0.066010027  | 1.387578784    |
| 0            | 4.710999827   | 1.356038296     | 0.832345978  | 1.359208433    |
| 1.250975875  | 0.072598152   | 0.079762126     | 0.044900689  | 3.177405065    |
| 0.016187893  | 0.018928386   | 1.070758272     | 0.012216285  | 3.8077849      |
| 0.072686915  | 0.086914243   | 1.315309784     | 0.0531713    | 1.30958855     |
| 1.200536527  | 0.0573788     | 0.062846595     | 0.035909217  | 3.103980851    |
| 0.090817869  | 0.109378532   | 1.39319679      | 0.065801048  | 2.496460045    |
| 3.408827633  | 1.189756562   | 1.190822192     | 0.032569439  | 6.04953637     |
| 0            | 1.506456303   | 0               | 0            | 1.914347544    |
| 1.905861194  | 5.792275895   | 0.924347796     | 0            | 3.342654617    |
| 0.11469429   | 0.13945215    | 1.495482095     | 0.082083168  | 4.512070852    |
| 0.133705864  | 0.163802569   | 0.183349702     | 0.094777455  | 3.583028772    |
| 0.082069095  | 2.437151113   | 1.355641048     | 0.0597362    | 5.778598971    |
| 4.331605456  | 0             | 2.793761833     | 0            | 2.386193154    |
| 0.002009832  | 0.002336975   | 0.002531368     | 0.001529128  | 3.33519233     |
| 0.660830635  | 1.823312881   | 2.062208884     | 0            | 3.328268929    |
| 0.039865151  | 3.237389663   | 4.959183668     | 3.355148359  | 2.556035897    |
| 0.015897064  | 0.018586187   | 1.069490199     | 0.011998796  | 1.068145333    |
| 0.010719077  | 0.012506716   | 4.531086365     | 0.008114522  | 1.641183672    |
| 2.014435412  | 0             | 7.916865528     | 0            | 1.303946048    |

|             |             |             |             |             |
|-------------|-------------|-------------|-------------|-------------|
| 0.59834149  | 1.433697068 | 1.718296435 | 0           | 3.810967923 |
| 0           | 0           | 1.81738295  | 0           | 0.867090243 |
| 0           | 5.272363056 | 0           | 2.215856258 | 7.38634184  |
| 2.830402389 | 0           | 0           | 0           | 3.824533443 |
| 0.026206508 | 0.03076457  | 3.869782303 | 0.019665032 | 3.165688504 |
| 2.102961937 | 0.833714331 | 2.747737252 | 0           | 3.732019127 |
| 0           | 0           | 1.561239331 | 0           | 3.063899607 |
| 1.029032089 | 0.008010791 | 7.712056424 | 0.005216893 | 2.627593766 |
| 3.135431002 | 0           | 1.965616827 | 0           | 4.351294304 |
| 4.265622633 | 1.209913327 | 1.837752234 | 0.035977044 | 3.301396494 |
| 0.045143796 | 1.195373673 | 0.058434867 | 0.033520031 | 2.252676837 |
| 0           | 0           | 0           | 0           | 1.567474072 |
| 0           | 1.564086754 | 1.977069218 | 1.981268293 | 2.560276398 |
| 0           | 1.694325007 | 1.046252295 | 0           | 2.976826318 |
| 0.932374822 | 0           | 0.93037455  | 1.923398214 | 3.591800802 |
| 1.173212812 | 0.04927095  | 0.053877559 | 0.03103232  | 3.064049892 |
| 1.550895647 | 0.170343828 | 1.598389674 | 0.09811691  | 3.375017965 |
| 0.001512563 | 0.00175842  | 1.006627232 | 0.001151126 | 6.549848043 |
| 0.231104794 | 1.962485959 | 0.338497536 | 0.156456602 | 3.85330035  |
| 1.029887127 | 0.008248186 | 2.364565707 | 0.005370434 | 3.954650623 |
| 0.209255338 | 0.264199774 | 0.301929687 | 0.143072053 | 3.45499643  |
| 0.01103772  | 0.012880119 | 2.06344978  | 0.008354215 | 1.642845995 |
| 0           | 0           | 2.075148449 | 1.802841983 | 1.373326551 |
| 0.066422642 | 0.079226742 | 2.368185748 | 0.048752212 | 1.925073271 |
| 6.293027284 | 0.927478828 | 4.743307601 | 0           | 3.06005969  |
| 0.858201692 | 0           | 1.804034117 | 0           | 2.946541894 |
| 1.146553586 | 0.041451002 | 3.390643557 | 0.026269638 | 2.198072763 |
| 0           | 0.98164114  | 1.562545949 | 0           | 2.97277556  |
| 1.430439004 | 0           | 0           | 0           | 4.485215309 |
| 0.05073776  | 0.060143336 | 0.065911499 | 0.037558126 | 3.487784033 |
| 0.15684969  | 0.193936375 | 3.689443605 | 0.109924596 | 2.366171377 |
| 0.106081161 | 1.452669571 | 0.142841683 | 0.07625418  | 0.153230108 |
| 0.683015488 | 0           | 0           | 0           | 2.655681577 |
| 0           | 0           | 1.646439673 | 0           | 3.045038586 |
| 0           | 0           | 5.072379187 | 0           | 1.810259571 |
| 1.699760528 | 1.101563541 | 0.029796577 | 0.017543242 | 3.147934077 |
| 0.968041422 | 1.95694947  | 2.537798434 | 0           | 4.591243664 |
| 1.590587263 | 2.328552438 | 0.001410634 | 0.00085304  | 3.814933542 |
| 0.050458731 | 0.059805973 | 2.282455941 | 0.037357282 | 4.415916863 |
| 0.887134812 | 1.443534144 | 0           | 0.895946527 | 2.159381214 |
| 0           | 1.314286129 | 2.260580342 | 0           | 3.4521379   |
| 2.762125613 | 0           | 2.274146295 | 0           | 1.543497014 |
| 0.0514354   | 0.06098715  | 1.852449057 | 0.03806002  | 1.219512141 |
| 0.237732795 | 2.690958396 | 0.349803255 | 0.160469369 | 3.598520027 |
| 0.858410516 | 0           | 1.405924043 | 0           | 4.156256841 |
| 2.474536031 | 0           | 0.916194238 | 0           | 2.874313397 |
| 0           | 2.387488765 | 1.414091161 | 0           | 3.242736489 |
| 2.925836606 | 0.41247568  | 0.829478369 | 0           | 11.88869145 |
| 0.019623543 | 1.687171246 | 1.085730085 | 0.014780131 | 5.492290446 |
| 2.019329096 | 0.004212309 | 2.343796532 | 0.002751882 | 5.06959137  |
| 0.02120522  | 0.024844279 | 0.027033266 | 0.015957116 | 2.714916182 |
| 1.736718613 | 1.331620821 | 0.794749809 | 0           | 3.573519097 |
| 0           | 2.596922369 | 0.637412708 | 0           | 2.422518031 |
| 0.080647585 | 0.096738225 | 0.106807356 | 0.05874563  | 4.088667877 |
| 0           | 0.359609342 | 0.756186516 | 0           | 3.114479254 |
| 2.038047439 | 1.713973645 | 1.321024936 | 0           | 4.771785421 |
| 0           | 1.542334196 | 1.166883673 | 0           | 2.914731743 |
| 0           | 0.910614075 | 1.475273221 | 0           | 3.034105261 |

|             |             |             |             |             |
|-------------|-------------|-------------|-------------|-------------|
| 1.18979592  | 0.054180383 | 0.059304942 | 0.033992699 | 6.190180688 |
| 0.609255918 | 0.603286933 | 1.446350789 | 0           | 1.092704779 |
| 0.084557015 | 0.101585211 | 10.24773933 | 3.690163544 | 0.119951256 |
| 0           | 1.509282734 | 0.466009701 | 0           | 3.415732684 |
| 1.860808561 | 2.313461201 | 0.075420902 | 0.042618263 | 7.327840054 |
| 0.027312225 | 0.032076615 | 0.034953853 | 0.020482004 | 3.344393952 |
| 0.018265006 | 0.021374659 | 2.430923625 | 0.013767516 | 3.821313767 |
| 6.197192135 | 1.000035539 | 0           | 0           | 4.520801726 |
| 0.281982477 | 0.36650443  | 3.425401153 | 0.186726117 | 0.477154399 |
| 0.076276637 | 0.091336601 | 6.524284619 | 0.055690643 | 0.107462264 |
| 1.082772056 | 0.023097241 | 3.448454223 | 1.075050829 | 2.705989594 |
| 1.919892018 | 0.08478013  | 1.307840528 | 0.051949604 | 2.730512217 |
| 1.072718113 | 4.916962475 | 1.07564798  | 0.01305443  | 5.163069661 |
| 1.638036615 | 0.201250085 | 1.699362854 | 0.113512096 | 1.689441429 |
| 1.055670708 | 1.65413859  | 1.655061932 | 0.009997758 | 2.075472459 |
| 1.551476582 | 0.970957639 | 1.961426343 | 0           | 3.277836289 |
| 0.060981412 | 0.072579884 | 1.264897718 | 0.044890021 | 2.675217848 |
| 0.637844868 | 1.49235166  | 0           | 0           | 2.577140455 |
| 0           | 0           | 0.982530878 | 0           | 1.977005927 |
| 1.290773441 | 2.38127495  | 0.093447232 | 0.051985504 | 3.607918219 |
| 1.427681274 | 1.452953735 | 1.458906312 | 0.076300515 | 2.121059211 |
| 2.612750803 | 0           | 1.635372924 | 0           | 3.645892489 |
| 0           | 0           | 0.690794315 | 0           | 3.077470105 |
| 0           | 0           | 1.403166311 | 0           | 1.409999587 |
| 0.1204829   | 0.146828119 | 0.163778292 | 0.085973059 | 1.511740285 |
| 0           | 2.169588167 | 0           | 0           | 2.643724281 |
| 0.083764824 | 2.004583047 | 3.673680688 | 0.060915964 | 4.529186902 |
| 3.303426352 | 1.245269139 | 1.247003772 | 0.041930389 | 4.957066933 |
| 1.661122201 | 0.017970909 | 2.41388758  | 0.011607442 | 3.42209512  |
| 0.00886842  | 0.01033987  | 3.379457621 | 0.006720675 | 2.863415492 |
| 2.749239877 | 2.156225592 | 0.709922633 | 0           | 4.821341921 |
| 0           | 0           | 1.486017924 | 0           | 0.920932415 |
| 0           | 0           | 0.96465039  | 0           | 3.530493068 |
| 0.022866118 | 0.026807789 | 6.106487257 | 0.0171908   | 3.469883608 |
| 0           | 0           | 3.668152594 | 0           | 1.972111286 |
| 0.085605816 | 0.102888062 | 2.469262144 | 0.062194469 | 2.469125605 |
| 0.072573601 | 0.086774848 | 4.701338328 | 0.05309162  | 2.400270715 |
| 0.008917058 | 0.010396778 | 2.640055308 | 0.006757345 | 3.380382838 |
| 0.570468586 | 1.6796228   | 0           | 0           | 10.50190139 |
| 1.132462409 | 3.561529296 | 1.484201403 | 0.656167245 | 2.410911254 |
| 2.94927363  | 5.16124996  | 1.112280599 | 0.01930869  | 1.718938534 |
| 5.371451839 | 3.587195019 | 1.284932846 | 3.679107445 | 8.793136271 |
| 0.061238155 | 4.17194678  | 1.901997735 | 0.045072757 | 10.6767429  |
| 0           | 1.952116686 | 0.905117128 | 0           | 1.520690068 |
| 2.664305283 | 0.0797342   | 2.706557761 | 0.049045489 | 2.36971749  |
| 0.038107622 | 1.165206993 | 1.784402964 | 1.142810104 | 1.162876846 |
| 1.016414333 | 2.831154988 | 1.017002597 | 0.002950408 | 4.274494646 |
| 0           | 0           | 1.463854176 | 0           | 2.184019391 |
| 0.678580282 | 1.552026306 | 1.175503865 | 0           | 2.92651301  |
| 0.754346987 | 0           | 0           | 0           | 2.61202812  |
| 2.12224485  | 2.239151831 | 2.224661013 | 5.050371503 | 3.560078078 |
| 1.789044042 | 0.049843462 | 1.805338168 | 0.031378713 | 4.081554374 |
| 0           | 1.52044318  | 1.519796041 | 0           | 3.089536573 |
| 1.973525466 | 0.978477573 | 1.55867751  | 0           | 2.9680682   |
| 0.897114301 | 3.302192596 | 2.173279534 | 0           | 2.173886509 |
| 0           | 5.754089719 | 1.582192809 | 5.421036188 | 5.756199917 |
| 0.030380156 | 0.035723012 | 2.172303037 | 0.02274352  | 2.501494372 |
| 0           | 2.87440664  | 0           | 0           | 2.864858436 |

| hsa-miR-5683 | hsa-miR-129-5p | hsa-miR-889-3p | hsa-miR-204-5p | hsa-miR-653-3p |
|--------------|----------------|----------------|----------------|----------------|
| 1.992753204  | 5.489749251    | 6.94834622     | 6.965097591    | 0.082082038    |
| 1.228267808  | 1.85675779     | 4.036535422    | 5.25382307     | 1.839318571    |
| 0.032028187  | 2.739876859    | 5.930768652    | 11.14216843    | 1.108121509    |
| 3.787439413  | 0.016615119    | 5.926220399    | 4.735606137    | 2.07166376     |
| 2.468064277  | 2.467752013    | 7.099502413    | 8.438804105    | 1.990855317    |
| 2.208478003  | 1.778675439    | 4.049205262    | 10.70539111    | 0.038095748    |
| 1.49099874   | 0.149148123    | 4.876327843    | 7.217475045    | 1.46187483     |
| 2.417374462  | 2.091553499    | 6.587537301    | 5.944198143    | 2.085472226    |
| 1.902879255  | 2.220371644    | 7.245776423    | 6.464792783    | 0              |
| 0.043891008  | 1.152511708    | 4.318019842    | 5.791617913    | 0.035891611    |
| 5.642896555  | 8.802480914    | 3.522324874    | 9.180447819    | 1.727469597    |
| 1.668279124  | 2.814521505    | 6.742090969    | 6.916002705    | 0.160858282    |
| 3.93714892   | 1.34357842     | 5.907858131    | 5.601144331    | 0.081627131    |
| 0.981705528  | 1.562711349    | 7.803070182    | 4.363482272    | 0              |
| 0.177777021  | 2.252873285    | 4.508868462    | 5.21563616     | 1.538264372    |
| 1.749628362  | 1.137214973    | 5.737375462    | 5.705592079    | 0.032265629    |
| 1.383390618  | 7.653032911    | 8.093389885    | 0              | 2.148418673    |
| 3.314673049  | 2.426222973    | 7.298990796    | 7.724307726    | 1.343467535    |
| 3.680595878  | 1.888034119    | 6.390501351    | 7.133506595    | 1.243877409    |
| 0.227613473  | 0.226951557    | 3.762108129    | 7.074742033    | 0.173633559    |
| 3.004032233  | 3.003386077    | 6.396236029    | 8.614567424    | 3.202009694    |
| 0.269114742  | 0.268281875    | 3.379586414    | 4.289284848    | 0.202283186    |
| 2.119815177  | 0.026204927    | 4.534436595    | 11.31305423    | 1.689874395    |
| 3.609579924  | 1.4537206      | 4.65318558     | 4.347288191    | 0.108328569    |
| 2.560914154  | 3.405819799    | 6.188360996    | 6.473695187    | 1.42440523     |
| 2.967912398  | 2.686876386    | 6.063265426    | 5.839234123    | 0.697770143    |
| 2.292894575  | 0.978933597    | 4.666965024    | 6.340862323    | 0              |
| 0.05747288   | 0.05734998     | 5.51360657     | 5.391101227    | 1.806806307    |
| 4.291734987  | 2.949144702    | 6.244933489    | 11.35617741    | 0.063964524    |
| 0.037000838  | 1.129083735    | 5.486300208    | 6.450598583    | 0.030340465    |
| 1.278314452  | 2.166156369    | 9.46745003     | 4.23824444     | 2.207870623    |
| 5.087001759  | 1.584597404    | 5.882159284    | 6.845003347    | 0.999707932    |
| 3.207816858  | 2.918589143    | 5.919698452    | 3.82313703     | 0.543833083    |
| 3.422077971  | 2.796310545    | 6.012657332    | 5.695948987    | 2.823448717    |
| 0.089929479  | 0.089723921    | 5.50233226     | 6.015242864    | 0.07222135     |
| 4.355262867  | 0.255226762    | 4.244345855    | 7.420441177    | 2.405413695    |
| 2.494551057  | 3.106742681    | 9.979782598    | 8.83205529     | 0.0938751      |
| 2.314214723  | 0.814741384    | 11.51212371    | 8.077065955    | 0              |
| 4.378530226  | 0.077567344    | 4.717612822    | 11.52335908    | 0.062729471    |
| 3.912270235  | 1.670463345    | 7.25259665     | 6.48771513     | 0.016603637    |
| 1.957972705  | 1.95781492     | 4.714039623    | 7.94810672     | 1.300247623    |
| 0.061307366  | 4.392079428    | 5.492758867    | 8.799672468    | 0.049789154    |
| 2.04714165   | 2.046917132    | 5.832046164    | 6.654287533    | 1.372228159    |
| 2.245190435  | 3.975132846    | 7.129973205    | 7.251426868    | 1.798987083    |
| 0.935162813  | 3.70839813     | 11.09750682    | 5.47941548     | 0              |
| 1.899201485  | 1.899232503    | 5.086337983    | 6.805775924    | 0              |
| 2.162650652  | 2.95543212     | 4.708380229    | 3.477575769    | 1.465354717    |
| 0.177755206  | 0.177278249    | 4.989202903    | 5.961898902    | 0.138086572    |
| 3.658410795  | 4.498488065    | 3.967953263    | 5.924730244    | 0.084505248    |
| 2.38682147   | 0.863097307    | 10.47628787    | 4.904010675    | 1.826026122    |
| 0.00247709   | 0.002472413    | 6.522020312    | 6.834426682    | 1.008563921    |
| 1.818019339  | 1.522620247    | 6.018248119    | 7.268325371    | 0              |
| 2.554362296  | 2.223499269    | 6.555967403    | 5.553608141    | 2.207081024    |
| 1.069592212  | 2.090681506    | 7.611004209    | 6.797365494    | 2.084662331    |
| 1.641766358  | 2.874154483    | 4.881096603    | 11.89535868    | 1.045497807    |
| 0.77032453   | 0.770289945    | 10.67851784    | 8.378796914    | 0              |

|             |             |             |             |             |
|-------------|-------------|-------------|-------------|-------------|
| 1.71908382  | 1.960448641 | 6.53689363  | 6.50876584  | 1.44947978  |
| 0.864119829 | 0.864103747 | 3.783030642 | 8.492798927 | 0           |
| 0.702905572 | 1.21348939  | 5.265890633 | 7.790535413 | 2.16531026  |
| 1.167210976 | 1.167206812 | 10.61061663 | 6.205588041 | 0.671133647 |
| 5.215169951 | 1.722614513 | 5.307632637 | 6.795392926 | 2.464270857 |
| 1.775866584 | 1.775920829 | 6.042289523 | 5.394452359 | 1.787170439 |
| 0.6822392   | 0           | 5.799656317 | 6.19549385  | 1.19802931  |
| 2.850402208 | 2.627238259 | 6.440683353 | 10.09990377 | 0.007048855 |
| 0.974036862 | 3.545976097 | 5.765368779 | 5.481702833 | 0           |
| 1.211343493 | 1.836953053 | 5.36725763  | 6.574561628 | 1.202636367 |
| 3.079872591 | 1.196640947 | 4.465662956 | 5.471660643 | 0.046383032 |
| 2.786408191 | 0           | 7.126098334 | 7.523217487 | 0           |
| 3.97368951  | 0.982664257 | 5.726923899 | 6.038048854 | 4.620133892 |
| 3.787829325 | 0           | 6.885961742 | 5.583672831 | 1.714652322 |
| 2.224975247 | 0.930220818 | 6.599526864 | 3.977325746 | 0           |
| 0.052582346 | 1.181804831 | 4.360911934 | 5.449649678 | 0.042850793 |
| 3.354712028 | 1.596920668 | 6.148089307 | 9.162518928 | 1.557406255 |
| 4.817496443 | 1.593019037 | 7.323629819 | 4.654330663 | 0.001550046 |
| 5.905652973 | 2.701167238 | 5.03233084  | 5.032238002 | 0.239983954 |
| 1.031040981 | 4.570504033 | 6.19945316  | 5.297179297 | 0.007257251 |
| 4.132933941 | 3.068887495 | 5.130664919 | 8.609823068 | 2.491714078 |
| 2.652596997 | 0.013646753 | 4.776185063 | 5.120617172 | 2.059090607 |
| 1.370361305 | 0           | 4.880987654 | 11.16364149 | 0.829538718 |
| 1.92684657  | 1.926709223 | 5.758232606 | 6.022459037 | 1.903391842 |
| 1.903445182 | 3.888330221 | 6.128715277 | 9.3915648   | 1.908942373 |
| 1.804431362 | 3.771952699 | 6.182661176 | 5.430420896 | 0.857407596 |
| 3.021680207 | 2.527715115 | 6.96836608  | 6.561907399 | 1.147736084 |
| 1.562568698 | 1.562572685 | 7.189207496 | 6.509281679 | 0.982099591 |
| 3.70125954  | 0           | 7.943538442 | 6.721868657 | 0           |
| 0.064287035 | 0.064147572 | 4.234921737 | 5.090059307 | 1.83130155  |
| 3.445278    | 2.361454289 | 5.272889487 | 5.033440873 | 0.162202438 |
| 2.121218524 | 1.458050354 | 5.252950008 | 8.926116192 | 0.109382698 |
| 0.677690783 | 2.806427514 | 5.604132532 | 5.293982948 | 1.192183297 |
| 1.646850627 | 0.741531187 | 3.046151394 | 7.850151726 | 0           |
| 4.660845769 | 2.185250389 | 1.305983761 | 9.381368751 | 0.506974652 |
| 3.850085152 | 3.145360833 | 5.481664701 | 10.25105302 | 0.023950863 |
| 0.966948449 | 3.121095664 | 6.516023342 | 7.632452323 | 0.967833375 |
| 2.006467557 | 1.5909328   | 8.33441071  | 5.531438585 | 1.0047769   |
| 4.639968973 | 2.88329562  | 5.033530342 | 5.86054561  | 0.051860163 |
| 4.341093892 | 1.442430668 | 4.56613369  | 7.198689176 | 2.169497521 |
| 2.477372369 | 2.008747533 | 6.268761503 | 6.000588075 | 0           |
| 3.270615885 | 0.965558855 | 5.988478362 | 6.776707221 | 0           |
| 3.638459883 | 1.851572704 | 7.48595312  | 5.802395431 | 1.21443675  |
| 2.015450477 | 0.335127452 | 5.779734684 | 6.036518803 | 0.246956258 |
| 2.781872552 | 1.405965096 | 4.286870299 | 4.462712539 | 0.857617351 |
| 3.19538386  | 1.88823802  | 5.695181436 | 9.591981715 | 0           |
| 0.861148096 | 1.414138431 | 6.721665272 | 5.877173834 | 1.420917159 |
| 2.851992233 | 2.548416769 | 7.557653282 | 4.307452119 | 0.416153618 |
| 2.438258425 | 5.17311896  | 5.65870378  | 6.528410872 | 1.082965289 |
| 0.004466077 | 3.345318606 | 6.134036889 | 4.548504728 | 0.003710532 |
| 1.69667957  | 2.120484715 | 8.996298398 | 5.14476338  | 0.02175634  |
| 3.137964879 | 0.794184429 | 6.961521867 | 6.350004602 | 2.045512342 |
| 2.032137363 | 1.126921533 | 6.879395645 | 5.61936825  | 1.512912062 |
| 1.997287981 | 1.997102292 | 5.378180446 | 5.040634271 | 0.083034646 |
| 5.124744985 | 4.527463074 | 8.126204273 | 2.814646033 | 1.347959358 |
| 2.487608179 | 2.0183885   | 7.307616344 | 6.37792921  | 1.330172773 |
| 4.606141646 | 2.292641664 | 6.191462834 | 5.769337802 | 2.108826457 |
| 5.903329957 | 2.676561611 | 6.406803345 | 5.660404836 | 0           |

|             |             |             |             |             |
|-------------|-------------|-------------|-------------|-------------|
| 1.199472443 | 3.451282997 | 6.008159638 | 6.575788401 | 0.047055814 |
| 1.736540343 | 4.074950797 | 8.187406956 | 4.344556977 | 1.096335732 |
| 1.366198606 | 3.071536809 | 3.079002303 | 11.42777316 | 1.98459896  |
| 1.504199099 | 4.41261715  | 6.57620356  | 2.859987725 | 0           |
| 0.073525991 | 0.073363401 | 5.238061645 | 6.671011068 | 1.240283994 |
| 1.728375387 | 1.119325776 | 7.519468611 | 6.397122542 | 0.028032271 |
| 2.696130031 | 1.079926485 | 5.854151934 | 11.10997415 | 0.018736421 |
| 5.465049803 | 2.806253345 | 4.375403094 | 4.521155599 | 1.368960434 |
| 0.409743899 | 0.408217447 | 7.572125316 | 7.813098214 | 0.293624865 |
| 3.255774041 | 2.417477914 | 6.56606739  | 10.41198434 | 0.078514251 |
| 3.294409047 | 1.086295394 | 5.179364847 | 4.941768052 | 2.694883598 |
| 0.09094684  | 0.090738537 | 6.860377549 | 5.988778061 | 0.073009586 |
| 0.021518849 | 1.075758575 | 6.050702081 | 5.02535286  | 0.017755313 |
| 4.503947442 | 2.387310132 | 6.388243103 | 6.163768164 | 0.167999854 |
| 1.05792581  | 2.400719396 | 5.045181081 | 4.734291978 | 0.013563005 |
| 4.655611497 | 2.28176387  | 4.760901833 | 5.625371752 | 0           |
| 4.772849671 | 1.264966021 | 5.354715124 | 3.176015584 | 0.062714004 |
| 1.781906097 | 0.63252221  | 7.276394623 | 6.689635965 | 2.618075355 |
| 0.982497883 | 0.982496661 | 5.526413918 | 6.381011502 | 0.982981647 |
| 8.202345383 | 1.308043882 | 2.728975168 | 7.639662986 | 0.073062249 |
| 0.138865546 | 1.458340836 | 5.058168498 | 7.842093014 | 0.109453431 |
| 0           | 1.636105427 | 9.736526826 | 6.262108789 | 1.013977304 |
| 1.196684005 | 1.572732611 | 6.43204292  | 6.863170272 | 4.698899365 |
| 4.505523109 | 3.660760483 | 7.314049701 | 7.035578599 | 0           |
| 4.020692542 | 2.642538542 | 3.71082352  | 12.11320465 | 0.124335964 |
| 1.852170269 | 1.449225597 | 7.005715047 | 6.516704204 | 1.45486199  |
| 1.362806741 | 5.466628454 | 4.332965837 | 4.780362963 | 1.344359406 |
| 3.809018521 | 6.190998223 | 4.366660588 | 6.261165535 | 0.058433341 |
| 1.067308623 | 1.067310635 | 6.256697284 | 5.532502995 | 0.015768054 |
| 3.378939447 | 2.639382761 | 6.63215357  | 6.062072852 | 1.037673504 |
| 0           | 1.90108777  | 6.016393582 | 5.197146641 | 7.271339236 |
| 2.689424994 | 0.919172467 | 6.076619488 | 7.730444825 | 0           |
| 0           | 0           | 4.587466273 | 6.434155863 | 0           |
| 0.02851622  | 1.70528878  | 3.469518049 | 11.28123581 | 0.023462731 |
| 0.978781285 | 2.292695657 | 5.095292729 | 8.344737079 | 0           |
| 3.306881409 | 0.110400172 | 5.191867071 | 7.18770937  | 1.351649828 |
| 2.734734836 | 0.092899519 | 6.407527539 | 8.003414552 | 1.299794244 |
| 1.039085363 | 0.011011764 | 4.230425759 | 9.944110255 | 0.00914209  |
| 0           | 1.674249131 | 8.344039622 | 3.98268395  | 0           |
| 2.412663112 | 2.412906762 | 5.747803796 | 5.469313884 | 0.633434506 |
| 1.720155409 | 2.14568075  | 3.752838707 | 5.730675777 | 1.108466724 |
| 4.647689275 | 5.447731191 | 8.788665624 | 6.21558029  | 5.380490081 |
| 0.078059693 | 1.900834086 | 6.764982919 | 5.532398177 | 0.062978993 |
| 2.41691928  | 1.513344352 | 6.935784786 | 6.970277334 | 0           |
| 2.368229868 | 2.368009901 | 7.397709863 | 6.025029073 | 0.068759735 |
| 2.214014279 | 2.544287042 | 6.165316976 | 5.872476172 | 1.159804028 |
| 2.34525826  | 2.831715992 | 5.275033053 | 5.934195766 | 1.604579947 |
| 0.901232346 | 0           | 5.837227423 | 6.211804549 | 0           |
| 2.303542583 | 2.651646262 | 6.929061044 | 6.743546837 | 1.566249224 |
| 1.657782312 | 1.272987042 | 6.335582085 | 6.254086756 | 2.641071103 |
| 4.646794797 | 0.870800513 | 3.776701282 | 5.567325829 | 0           |
| 4.266910985 | 1.804696505 | 4.738648117 | 5.838670836 | 3.038585958 |
| 1.51984579  | 2.248025762 | 8.732375129 | 6.021467009 | 0.948013065 |
| 0.978420728 | 0           | 4.214030113 | 7.564726355 | 0.979012268 |
| 2.652010048 | 2.652098811 | 6.565752285 | 5.658308119 | 3.552451846 |
| 1.881986134 | 4.702027508 | 6.362917298 | 4.237212457 | 2.873740713 |
| 2.993242436 | 2.171468099 | 5.375926723 | 5.907703965 | 0.031186779 |
| 2.867947527 | 3.276873113 | 6.511037869 | 5.77567894  | 1.746583921 |



| hsa-miR-766-5p | hsa-miR-551b-3p | hsa-miR-539-3p | hsa-miR-20b-3p | hsa-miR-1185-1-3p |
|----------------|-----------------|----------------|----------------|-------------------|
| 1.29611109     | 5.094944452     | 2.776323059    | 2.413437809    | 1.316992773       |
| 0.041210131    | 5.902055703     | 0.067999736    | 2.278442574    | 0.048969168       |
| 0.020390102    | 1.719235259     | 1.719978702    | 1.715529988    | 1.105087865       |
| 1.052397822    | 3.896911239     | 0.016974277    | 2.073826424    | 0.01259667        |
| 1.317865376    | 1.36847492      | 2.470826799    | 2.00459763     | 1.340660998       |
| 0.02934293     | 0.050058869     | 0.047617885    | 0.04106588     | 0.034700412       |
| 0.08702374     | 2.963517618     | 0.153397518    | 0.128262935    | 0.105321079       |
| 0.012821278    | 4.632482738     | 2.683426339    | 0.017681599    | 1.06614402        |
| 1.507169805    | 5.373301896     | 2.219957673    | 3.217953029    | 1.502178667       |
| 1.738917273    | 9.603347486     | 1.76814701     | 1.149762154    | 0.032706823       |
| 0              | 5.985747046     | 0              | 1.423891054    | 0                 |
| 1.547842995    | 1.665174051     | 1.670000584    | 0.177054974    | 0.143179146       |
| 0.061542604    | 1.339970414     | 1.343731608    | 1.334783572    | 0.073730537       |
| 0.983521624    | 2.296590192     | 3.142773382    | 1.563273163    | 0                 |
| 0.101413145    | 6.472268448     | 2.256996145    | 1.555024144    | 1.51636719        |
| 2.145820459    | 0.042226576     | 1.137103815    | 1.134819945    | 0.02942349        |
| 1.446129481    | 1.035410625     | 2.594418683    | 1.682597131    | 1.051308719       |
| 0              | 0.761308993     | 2.721899954    | 0.357635986    | 0.769949746       |
| 0.045967035    | 3.690201623     | 2.326611508    | 1.249454639    | 1.236064619       |
| 2.23047251     | 8.990483389     | 0.234340689    | 0.191526555    | 0.154195888       |
| 0.094502223    | 1.530941332     | 0.168429161    | 0.140228942    | 0.114710227       |
| 0.144414597    | 0.299566187     | 1.8391105      | 0.22419845     | 0.178728429       |
| 0.016795086    | 1.09091155      | 1.696200391    | 1.090725697    | 0.019760395       |
| 2.445404618    | 5.749912906     | 0.140834032    | 1.439990352    | 0.097357607       |
| 0.07996646     | 6.360233691     | 0.139506129    | 2.865580027    | 1.408552869       |
| 0              | 4.47446561      | 1.577941058    | 1.206913571    | 1.221584251       |
| 1.976611642    | 8.048115171     | 0              | 2.778455956    | 0.98001202        |
| 0.035850119    | 0.061796818     | 1.822169588    | 1.813298143    | 0.042507706       |
| 0.048640517    | 0.085588311     | 1.906702766    | 0.069257873    | 0.057972078       |
| 0.023461057    | 6.929280767     | 1.740284664    | 0.032662403    | 0.027678365       |
| 0.516847555    | 1.988964929     | 5.498452098    | 0.941435839    | 3.592950527       |
| 0.999729827    | 0.999703714     | 2.321513349    | 0.999703081    | 0                 |
| 1.045320226    | 2.68092579      | 1.632549373    | 1.887649942    | 0                 |
| 2.026851668    | 4.297062506     | 1.671299819    | 1.987126489    | 1.302843564       |
| 0.054698868    | 5.312343235     | 1.946762492    | 0.078308413    | 0.065351796       |
| 1.644017111    | 0.284348943     | 0.263915365    | 0.213946129    | 0.171079933       |
| 0.070364377    | 0.1283114       | 4.728076141    | 0.10216364     | 3.028504892       |
| 0              | 4.088953114     | 6.368702988    | 0              | 4.137443062       |
| 0.047730185    | 1.261937515     | 1.265013742    | 0.067906268    | 0.05686624        |
| 0.012929168    | 2.684808363     | 3.102358831    | 3.266529945    | 0.015187931       |
| 0.056583723    | 0.10086208      | 0.095430216    | 1.307573577    | 1.290130381       |
| 0.03812646     | 1.208312007     | 0.062638566    | 0.053778745    | 1.196020501       |
| 0.070139709    | 0.127853921     | 2.495993978    | 0.101816853    | 0.084319507       |
| 1.167201457    | 2.579407697     | 1.813677139    | 1.805209146    | 0.040962623       |
| 2.508970946    | 0.936137962     | 6.792044386    | 0.935830657    | 4.721971284       |
| 0              | 6.19817319      | 0.924316709    | 0.924939586    | 0.927727441       |
| 0.087679191    | 5.236815173     | 0.154702047    | 1.478864639    | 0.106141861       |
| 0.101402246    | 0.194897829     | 1.576715717    | 2.664771783    | 1.516312594       |
| 0.063624672    | 0.114732854     | 2.450441948    | 1.98657601     | 0.076288505       |
| 0              | 4.421047331     | 6.624154267    | 0              | 3.139027275       |
| 2.331884531    | 2.820162852     | 2.011626       | 1.00870799     | 0.001889542       |
| 0              | 6.929594652     | 1.522289735    | 2.0792266      | 0                 |
| 0.031493772    | 4.723152905     | 2.824553794    | 0.044160688    | 1.162070655       |
| 0.012698611    | 5.394486292     | 3.424178279    | 0.017510522    | 0.01491569        |
| 0.008583235    | 0.014174308     | 1.046910524    | 1.046304533    | 0.010064853       |
| 0.787407068    | 4.934516185     | 6.233023935    | 1.304538166    | 3.141295147       |

|             |             |             |             |             |
|-------------|-------------|-------------|-------------|-------------|
| 0.615592435 | 2.505522368 | 2.652113959 | 0           | 1.092258661 |
| 0           | 0           | 0.864382318 | 0.865212291 | 0.869826727 |
| 0           | 6.290545018 | 0.70360888  | 0           | 0           |
| 0           | 5.394371216 | 5.336070309 | 0.668042396 | 3.218303042 |
| 0.020833675 | 4.344493348 | 0.033411138 | 1.112614577 | 1.107367682 |
| 2.123285575 | 3.541463567 | 1.77547939  | 0           | 2.108696419 |
| 0           | 3.852847811 | 1.858784381 | 0           | 0           |
| 0.005516042 | 1.02971904  | 1.030111696 | 1.620476435 | 1.618448174 |
| 0           | 4.129207228 | 1.553326165 | 1.554149434 | 0           |
| 1.184517499 | 1.836627885 | 1.211251178 | 2.25853112  | 1.196390515 |
| 1.781494814 | 0.061301796 | 2.253423018 | 1.811588271 | 0.042180864 |
| 0           | 3.148140889 | 3.300187426 | 0           | 0           |
| 0           | 6.571987505 | 0           | 3.145758256 | 0.983556944 |
| 2.014603634 | 3.174622765 | 2.748812614 | 1.050414956 | 1.067645026 |
| 0           | 5.952508717 | 2.224619582 | 0.930934658 | 0           |
| 1.1593792   | 0.056493951 | 1.181702791 | 0.046229371 | 0.038995444 |
| 0.10501928  | 1.593435374 | 2.28110132  | 2.240062888 | 0.128004199 |
| 2.007313436 | 1.592975561 | 2.331076217 | 0.001660413 | 0.001422138 |
| 0.168656176 | 5.332367225 | 0.336729392 | 0.267650146 | 0.210658708 |
| 3.495340953 | 0.009335444 | 1.622606242 | 2.039182865 | 0.006650806 |
| 0.153983529 | 1.895967171 | 0.300429116 | 0.241136819 | 0.191267723 |
| 1.043173423 | 0.014599215 | 1.64352856  | 2.060857272 | 0.010363572 |
| 0.840231447 | 3.050555893 | 1.370346324 | 0           | 0.83297611  |
| 1.249127808 | 2.706497901 | 1.288395729 | 2.949961957 | 0.061878193 |
| 1.507626422 | 3.885498687 | 0.927469773 | 0.928075001 | 0           |
| 0.866637181 | 1.407124526 | 1.804065583 | 2.791507649 | 0.860391847 |
| 0.027855627 | 0.047409696 | 3.218493769 | 0.038932696 | 0.032921663 |
| 1.979576799 | 0           | 3.142603829 | 1.97655305  | 0           |
| 0.879326801 | 0           | 3.25563477  | 1.828243843 | 0.873593088 |
| 0.039885961 | 7.518312799 | 1.848839971 | 1.216248991 | 1.205015207 |
| 0.117831288 | 0.233058601 | 0.217470663 | 1.646478094 | 0.144340563 |
| 0.081391966 | 1.454127953 | 0.142289429 | 0.119354535 | 0.098285622 |
| 1.219680574 | 1.18503611  | 2.098393813 | 0           | 0.686843908 |
| 1.691793662 | 0.745669997 | 0           | 0.742735452 | 0           |
| 0.526937419 | 0.958458893 | 0           | 4.156189515 | 0           |
| 0.018580444 | 1.100651727 | 0.029704804 | 2.453510148 | 1.095783925 |
| 0.970171037 | 1.544953657 | 1.544664486 | 0           | 0.968605979 |
| 2.327487123 | 3.329335255 | 4.177451112 | 1.004856821 | 2.005835389 |
| 2.2283799   | 3.640726408 | 0.065319135 | 1.215079628 | 0.047111662 |
| 1.867452729 | 7.242586222 | 1.442356871 | 0           | 0           |
| 0           | 5.672690544 | 2.475986901 | 0           | 0.788331385 |
| 1.961615935 | 4.033486433 | 1.542968487 | 0           | 0.96728473  |
| 1.195085335 | 7.296922283 | 3.487405503 | 1.219171746 | 0.04801695  |
| 0.173063236 | 0.378575427 | 2.743346234 | 0.27574277  | 0.21652137  |
| 0           | 0           | 0           | 2.124293266 | 0           |
| 0           | 2.463739608 | 0.91615948  | 0.916824799 | 0           |
| 2.157651844 | 0           | 2.383076252 | 2.133475722 | 0           |
| 0.43648136  | 0.423318318 | 2.652636597 | 0.830783087 | 0.848559895 |
| 2.092509185 | 7.030016529 | 1.688612026 | 3.925715829 | 1.679308132 |
| 1.014242271 | 0.004761522 | 2.607423598 | 2.828952925 | 0.003402872 |
| 1.082296225 | 1.696231043 | 4.045240442 | 1.09127718  | 2.107775173 |
| 0           | 5.20885652  | 1.720688401 | 0           | 0.801766178 |
| 2.109487357 | 5.924046743 | 2.422236586 | 1.132171229 | 1.525801047 |
| 1.299329844 | 0.112618043 | 2.443002615 | 0.090199362 | 0.074981829 |
| 0.798356901 | 1.329343575 | 3.588912022 | 1.925264792 | 1.796701117 |
| 0           | 0           | 2.839922746 | 1.325509911 | 1.33691217  |
| 3.139353878 | 5.700130456 | 2.474460172 | 2.309893448 | 0.675822974 |
| 2.892649469 | 3.321057356 | 2.196664841 | 4.392855466 | 0           |

|             |             |             |             |             |
|-------------|-------------|-------------|-------------|-------------|
| 0.036082358 | 1.822661637 | 2.256980403 | 2.244498542 | 0.042787097 |
| 0           | 0           | 3.140341968 | 0           | 3.217387729 |
| 0.065482299 | 4.997070636 | 0.111859436 | 0.094658639 | 0.078574236 |
| 0           | 1.237859866 | 2.650031722 | 1.517935243 | 0.472578719 |
| 1.21816619  | 7.011865034 | 1.884556598 | 4.239625184 | 0.053906175 |
| 1.706334417 | 3.879504902 | 2.155155384 | 1.117322305 | 1.111827709 |
| 0.014574002 | 1.078815189 | 1.079837675 | 1.678482059 | 0.017131625 |
| 0.56269443  | 1.005974725 | 0.999946213 | 2.093316532 | 0           |
| 0.20198952  | 5.035286771 | 2.211589426 | 0.330362989 | 2.012735415 |
| 1.90585556  | 0.106144957 | 1.977098168 | 1.322387325 | 1.30385418  |
| 1.673409345 | 1.688538855 | 1.086202305 | 2.107859676 | 0.018497712 |
| 1.265222343 | 1.304423696 | 0.09304816  | 0.079173741 | 1.283474227 |
| 1.067378888 | 7.207069231 | 2.691022765 | 1.673653977 | 1.071275963 |
| 0.121730917 | 0.242435551 | 1.699199709 | 1.668266346 | 0.14934364  |
| 2.062901273 | 0.017522507 | 1.057857073 | 0.014558866 | 0.012414043 |
| 0.973736981 | 5.345619171 | 0           | 0           | 0           |
| 2.272374056 | 6.446067459 | 1.26494913  | 0.067889344 | 0.056852387 |
| 2.103889329 | 0           | 2.415737685 | 2.042057843 | 0.641920826 |
| 2.564767969 | 5.21997393  | 1.976853887 | 0.982705889 | 0           |
| 1.265402877 | 4.540521573 | 1.308108823 | 0.079231563 | 0.066102078 |
| 1.386801513 | 0.151292395 | 2.123975134 | 0.11943315  | 1.4159947   |
| 1.714494046 | 0           | 4.314050811 | 2.279206959 | 1.679971996 |
| 0           | 7.086675105 | 1.87062244  | 2.347818859 | 0           |
| 1.090610974 | 0.582060169 | 2.870651507 | 1.412917059 | 2.191502164 |
| 0.091879857 | 0.173731838 | 1.520224619 | 2.160146831 | 0.111411817 |
| 0           | 5.573314459 | 0.889569665 | 0           | 0           |
| 0.06489123  | 7.71165927  | 0.110755267 | 0.093754378 | 0.077846591 |
| 2.58223463  | 1.878606068 | 0.073867762 | 0.063209112 | 0.053015539 |
| 0.012283776 | 0.020402173 | 1.666348135 | 0.016932253 | 1.659191379 |
| 1.62524959  | 3.518016239 | 3.865854246 | 0.00975227  | 1.628062702 |
| 2.215303041 | 7.294798972 | 0.709780929 | 1.22662931  | 0           |
| 0.926599548 | 0           | 0           | 1.48832419  | 0           |
| 0.968024197 | 5.19112365  | 0           | 0.964980249 | 0           |
| 0.018206294 | 0.030519613 | 1.705535476 | 0.025228455 | 1.093859741 |
| 0.980880231 | 0           | 0.978813516 | 2.293862351 | 0           |
| 1.316586148 | 1.366902624 | 2.023306713 | 0.095856321 | 0.079537343 |
| 0.056498338 | 1.311344964 | 1.314870556 | 0.0810153   | 0.067550524 |
| 0.007146336 | 0.011775216 | 1.039035757 | 0.009805869 | 1.036893575 |
| 2.000322875 | 1.039746573 | 2.600621452 | 0           | 1.422231468 |
| 1.159911982 | 7.58624776  | 0.630545699 | 1.494004708 | 1.139640488 |
| 1.099490571 | 7.848614049 | 0.032786924 | 1.110561915 | 0.02410263  |
| 0.520873314 | 4.876007078 | 4.513340665 | 6.418100977 | 0.964835473 |
| 0.047914189 | 4.643423116 | 2.946798398 | 1.260100014 | 2.297462347 |
| 0           | 2.272373405 | 2.414009268 | 0.907615049 | 2.348660118 |
| 1.25060533  | 6.218689711 | 2.97820078  | 1.283360283 | 0.062260703 |
| 1.145997252 | 3.238797558 | 3.040577065 | 1.163102595 | 1.155079134 |
| 0.00311862  | 6.934129896 | 2.345359736 | 2.607794722 | 1.603925401 |
| 0           | 1.868412715 | 1.463846951 | 0.902141271 | 0           |
| 0           | 3.766955955 | 2.091214638 | 1.557760846 | 1.195608338 |
| 0.767311393 | 6.624947538 | 2.212198113 | 1.665948516 | 0.757643216 |
| 1.556426221 | 4.537174573 | 0.87206071  | 2.647186463 | 0           |
| 0.033296017 | 4.525172906 | 0.054332647 | 0.04676298  | 0.039438458 |
| 0           | 1.929303996 | 3.725386429 | 2.925457378 | 0.949232537 |
| 0           | 7.630474275 | 0           | 3.429031262 | 0           |
| 0           | 7.425174279 | 1.455003099 | 0.89503864  | 0           |
| 2.415520464 | 6.801588092 | 2.525529426 | 2.358822297 | 1.225295864 |
| 0.024105152 | 0.040784149 | 0.038833557 | 0.033578371 | 0.028445695 |
| 0           | 6.222678527 | 1.341511073 | 0           | 0           |

| hsa-miR-483-3p | hsa-miR-135b-5p | hsa-miR-4739 | hsa-miR-206 | hsa-miR-199b-5p |
|----------------|-----------------|--------------|-------------|-----------------|
| 1.335332556    | 2.778469911     | 1.327177491  | 1.336215604 | 6.247254303     |
| 13.91187476    | 1.227752958     | 1.217936394  | 1.223256735 | 3.324412044     |
| 3.486642899    | 3.624741975     | 1.711631562  | 2.139229475 | 4.564535244     |
| 11.62829695    | 2.402504241     | 4.247943685  | 0.014722652 | 6.11577765      |
| 5.724132783    | 4.857683142     | 2.425011886  | 1.361822717 | 9.661920456     |
| 6.994551727    | 0.048462791     | 2.519995041  | 3.538224177 | 1.158077256     |
| 2.957298298    | 3.23724125      | 0.116050334  | 2.129550123 | 2.614452445     |
| 4.107325807    | 1.070016108     | 0.016311155  | 2.087954365 | 8.639650946     |
| 3.347453867    | 3.587391481     | 0.928878161  | 2.705961388 | 8.079116024     |
| 2.526300962    | 0.045598296     | 0.035543762  | 0.038532967 | 0.047774582     |
| 1.42512145     | 7.423373671     | 0            | 0.583008445 | 9.393607842     |
| 2.82089835     | 3.455526525     | 0.15888443   | 0.176209275 | 7.404911729     |
| 3.478739663    | 0.106624188     | 0.080757606  | 0.088287413 | 2.775529795     |
| 11.83967159    | 7.758947949     | 2.298576129  | 2.56027755  | 5.614380912     |
| 3.061575903    | 5.560341759     | 1.535994921  | 0.150733586 | 6.767845526     |
| 14.07719746    | 3.660907345     | 0.031955405  | 0.034619667 | 5.118933719     |
| 0.575096846    | 3.556799004     | 0            | 0           | 2.843671859     |
| 6.652748844    | 3.474525995     | 0            | 0           | 7.099353565     |
| 7.334976471    | 2.662654416     | 1.866863528  | 0.065040397 | 7.035158222     |
| 4.906596781    | 0.240234694     | 3.38113154   | 1.688253752 | 1.709903243     |
| 2.662730395    | 2.212608952     | 1.499525766  | 3.654301163 | 1.525297221     |
| 1.818022668    | 0.28506251      | 1.76264326   | 0.22304596  | 1.826360214     |
| 3.457872206    | 1.091865587     | 0.021420775  | 2.114932887 | 3.596921575     |
| 2.110233005    | 0.143851722     | 0.107114813  | 0.11767323  | 3.42609347      |
| 4.735845882    | 2.115329292     | 1.422780402  | 1.435683677 | 6.59676897      |
| 1.882818368    | 0               | 3.54121808   | 0           | 2.830208426     |
| 13.65060004    | 0               | 0.979561761  | 0.979197043 | 3.552682225     |
| 7.14084516     | 0.05977787      | 0.046281948  | 2.24257454  | 3.455888902     |
| 4.649606193    | 0.082655865     | 2.91291968   | 0.068986022 | 3.85113496      |
| 5.956717097    | 0.038417481     | 0.030049992  | 0.032543826 | 1.126075954     |
| 3.269026598    | 7.889633874     | 0            | 1.28811552  | 8.867742591     |
| 10.03155617    | 0.999700557     | 2.806960553  | 2.584558487 | 2.806919178     |
| 2.256956893    | 1.002158502     | 0.544366992  | 2.276876852 | 9.396711877     |
| 2.630186049    | 2.941217065     | 0            | 0           | 8.006168611     |
| 3.227879562    | 0.093796524     | 1.28925949   | 0.077995363 | 10.05142307     |
| 1.781990318    | 0.270865881     | 2.400705275  | 0.212863184 | 2.506206013     |
| 13.69423634    | 1.39405408      | 1.372055926  | 0.101735799 | 6.1418305       |
| 9.221372529    | 0               | 2.551295878  | 0           | 2.060308603     |
| 4.297152015    | 0.080999007     | 1.252414745  | 3.514441383 | 1.25923329      |
| 5.755827682    | 0.020851552     | 1.068362341  | 3.266346667 | 5.635413604     |
| 1.305930238    | 4.361637305     | 3.709098557  | 1.307240653 | 1.955304713     |
| 4.314288857    | 0.063787065     | 2.577352257  | 0.05357434  | 1.20618192      |
| 4.146045905    | 2.049822387     | 2.446941393  | 2.026118407 | 4.374765233     |
| 13.08283077    | 3.271674186     | 1.79814211   | 1.187070693 | 10.06898721     |
| 11.07827069    | 4.220014528     | 1.919173361  | 0.935871163 | 9.786475206     |
| 0.926575323    | 1.898888908     | 0.926201733  | 1.494460226 | 2.476169218     |
| 2.614844629    | 2.16688378      | 3.904409003  | 0.12873617  | 3.479045929     |
| 3.57857443     | 0.186804605     | 0.136455534  | 0.150715922 | 2.253069911     |
| 6.821463454    | 3.06519976      | 1.336440487  | 0.091442902 | 3.496825407     |
| 9.963045379    | 0               | 0            | 0           | 4.027145649     |
| 2.011457013    | 1.008785374     | 1.008542827  | 1.595370676 | 7.002923721     |
| 5.479353335    | 1.817028245     | 0            | 2.924909642 | 6.796512826     |
| 2.221872962    | 4.164031686     | 1.166549035  | 1.170369961 | 0.054707202     |
| 2.682125712    | 0.020472931     | 2.408927333  | 1.06849797  | 3.913208708     |
| 6.341784884    | 0.013756557     | 1.638615214  | 3.649994749 | 2.651103636     |
| 1.306397739    | 5.637862925     | 1.310165019  | 0.771644059 | 5.695573718     |

|             |             |             |             |             |
|-------------|-------------|-------------|-------------|-------------|
| 4.79617404  | 3.30405736  | 1.450842742 | 0           | 6.18131729  |
| 5.796412838 | 0.86478295  | 0           | 0           | 0.86746031  |
| 2.538250058 | 8.041408684 | 0           | 0           | 3.591383711 |
| 12.91275752 | 1.539596067 | 0           | 0           | 1.545193198 |
| 6.520254275 | 1.114145701 | 0.026640112 | 0.028832614 | 3.490848687 |
| 3.064236972 | 0.834469075 | 0           | 0.834902506 | 6.708279207 |
| 8.944351411 | 0           | 2.134870979 | 1.571111968 | 5.277804807 |
| 5.405435078 | 1.030034409 | 0.006984879 | 5.290382527 | 2.363197594 |
| 3.660531831 | 7.521068207 | 1.967904729 | 0.974355258 | 6.066457618 |
| 2.603200779 | 1.837866272 | 0.049387804 | 1.827735644 | 6.303031431 |
| 1.815774096 | 0.059301053 | 0.045923202 | 0.049881626 | 3.28073425  |
| 6.261855739 | 1.567263844 | 0           | 3.439016713 | 4.436465192 |
| 2.560445622 | 0.982738141 | 0.983184946 | 0           | 3.144008625 |
| 1.935412637 | 1.047212599 | 0           | 1.05070145  | 8.570498455 |
| 3.065039653 | 2.896001899 | 0           | 0.930977883 | 3.698271394 |
| 3.258934398 | 0.054668323 | 2.810194654 | 0.046056473 | 0.057331979 |
| 7.038373885 | 2.743147319 | 0.141644725 | 2.238844179 | 3.374071553 |
| 1.592856679 | 3.009751704 | 0.001536161 | 0.001654804 | 6.160427645 |
| 7.96246722  | 0.346584927 | 0.236665795 | 0.266185736 | 3.852346835 |
| 14.48626485 | 6.370435793 | 1.620513071 | 1.621479439 | 7.901699814 |
| 4.180323928 | 0.308782172 | 1.813022582 | 0.239866027 | 3.45355377  |
| 2.387584759 | 1.643517498 | 0.01121395  | 1.641723366 | 2.876901781 |
| 1.769122625 | 1.765123568 | 0           | 0.827467657 | 1.373843726 |
| 9.020111561 | 2.977952586 | 1.27420221  | 0.073748234 | 5.522359569 |
| 11.99302323 | 8.434170694 | 0           | 0.92811979  | 8.693876439 |
| 7.286532395 | 1.80399618  | 0           | 0.855591444 | 8.26694814  |
| 3.812143308 | 1.769403195 | 3.000840997 | 0.038789381 | 5.664377823 |
| 2.296710601 | 2.296407214 | 0.982142211 | 0.981822338 | 7.264693205 |
| 11.44020103 | 0           | 0           | 0.869160062 | 4.737844122 |
| 1.843761906 | 0.066904311 | 0.051624481 | 0.056133823 | 1.845691289 |
| 6.551485403 | 1.675701959 | 0.160207723 | 0.177719709 | 4.245389207 |
| 3.428667539 | 0.145346518 | 1.430309035 | 2.873664614 | 2.574707308 |
| 2.936895144 | 1.554869922 | 1.193067701 | 1.564553272 | 7.262935208 |
| 3.169392555 | 1.646537273 | 3.083366513 | 0           | 1.650677465 |
| 4.050115045 | 3.960897139 | 3.3639035   | 0.50389116  | 5.989797144 |
| 5.651809916 | 2.133198645 | 2.448546748 | 5.047670115 | 4.742779525 |
| 8.870626262 | 2.537685744 | 1.95907991  | 0           | 5.853332366 |
| 5.815250983 | 1.004899178 | 0.001138094 | 3.006759424 | 9.002323243 |
| 1.212905295 | 1.219103062 | 3.862295275 | 2.59818832  | 5.141109618 |
| 0.887541506 | 1.844326453 | 0.886713564 | 0           | 1.444614924 |
| 11.52383166 | 2.007533874 | 2.027066491 | 0.781823983 | 7.684266823 |
| 6.403364313 | 0           | 0.966559124 | 0           | 2.274374312 |
| 2.28438318  | 1.223318548 | 1.213766666 | 0.056914657 | 1.218816617 |
| 2.739197542 | 2.023883822 | 3.876984715 | 0.274217229 | 7.184986281 |
| 2.374956777 | 0.855314551 | 3.495678057 | 0.855803236 | 2.117848567 |
| 2.464908088 | 2.204309088 | 3.055445496 | 0           | 5.148590988 |
| 13.01244336 | 0.861827814 | 0.864353523 | 0           | 7.738665795 |
| 11.6169343  | 5.09140051  | 0.416674313 | 3.363206566 | 8.715026381 |
| 4.13074392  | 1.085551589 | 0.0199433   | 1.084446353 | 6.864071356 |
| 5.234702068 | 1.015821251 | 1.015377013 | 1.01566591  | 4.272707418 |
| 10.13237053 | 2.121183033 | 0.021552029 | 1.693167151 | 8.207983802 |
| 2.686433982 | 2.281234378 | 1.339756582 | 0           | 4.65600066  |
| 0.647253576 | 0           | 1.514192857 | 0           | 7.168332277 |
| 6.047820052 | 0.108556417 | 1.965579988 | 0.089830213 | 3.289553017 |
| 8.681930643 | 8.374212455 | 0           | 2.772265125 | 8.241914199 |
| 5.660884125 | 2.98757823  | 0           | 1.7186572   | 7.89268166  |
| 3.350808829 | 2.079843822 | 0.671048376 | 0           | 8.567301336 |
| 0.913292591 | 0           | 0           | 0           | 1.476978814 |

|             |             |             |             |             |
|-------------|-------------|-------------|-------------|-------------|
| 6.458481969 | 4.465340569 | 2.235410306 | 2.57382485  | 1.194952326 |
| 9.396934652 | 1.086104879 | 0           | 0.604699322 | 7.968149797 |
| 2.010657687 | 0.114127876 | 1.982802358 | 0.094267878 | 5.064123838 |
| 6.263199885 | 2.647763233 | 0           | 0           | 6.485121676 |
| 0.081042123 | 1.884834612 | 1.239512621 | 1.245509501 | 2.929298925 |
| 3.878974457 | 1.728677515 | 0.027765274 | 0.030056687 | 9.06199572  |
| 3.115611303 | 0.023559983 | 0.018561678 | 1.078636888 | 2.696982264 |
| 13.63937021 | 1.001214873 | 1.660152603 | 0           | 6.582370262 |
| 3.44286085  | 0.439404659 | 0.28926585  | 0.328400366 | 2.202576291 |
| 1.320925967 | 1.330301372 | 0.077682971 | 3.225979328 | 2.759060739 |
| 3.124697768 | 0.025469045 | 1.0831679   | 2.433374984 | 1.084254301 |
| 6.71566251  | 2.393191414 | 0.072244967 | 2.702809079 | 1.301259817 |
| 3.814665011 | 1.075488615 | 1.671097405 | 0.019005626 | 7.051223134 |
| 5.062533538 | 0.231607932 | 2.306522315 | 0.184241472 | 7.442955096 |
| 2.400470716 | 2.07599483  | 0.013438012 | 0.014508151 | 1.654069948 |
| 3.954652232 | 0           | 0           | 0.971238286 | 0           |
| 6.898007086 | 0.080978273 | 0.062070719 | 0.06762361  | 1.897050249 |
| 3.288195817 | 0.63469288  | 2.05642726  | 1.127548463 | 7.573764842 |
| 3.558255009 | 1.976829116 | 0           | 0.982717713 | 8.838775333 |
| 4.849210621 | 1.951290592 | 3.839163135 | 2.370244982 | 4.77887789  |
| 5.477623261 | 3.196333145 | 1.430572793 | 0.118916642 | 6.888269086 |
| 11.06838193 | 1.353805177 | 1.664135088 | 1.363138308 | 6.620525696 |
| 8.856657926 | 1.197603961 | 0           | 0           | 6.702529477 |
| 11.44615081 | 1.40369697  | 0           | 0.575681823 | 8.192831818 |
| 3.708944693 | 2.195021034 | 0.122902107 | 2.159134847 | 2.189232797 |
| 5.104205498 | 2.833736817 | 0.892090741 | 0.890405526 | 7.854703498 |
| 5.445759605 | 1.362475183 | 1.979320702 | 0.093368024 | 4.333435495 |
| 13.40045226 | 0.075254867 | 1.858394374 | 0.062964071 | 0.079092437 |
| 2.903392802 | 0.019792318 | 1.66159669  | 1.066256035 | 4.563938419 |
| 6.570070087 | 1.038724449 | 2.8578113   | 2.048932701 | 7.07356215  |
| 0.718017955 | 1.222268549 | 1.233192646 | 0           | 4.891064664 |
| 1.893915497 | 0           | 0           | 2.213792057 | 2.688624207 |
| 3.405557765 | 0.964733387 | 0           | 0.965003491 | 1.542420476 |
| 1.096855422 | 0.029586563 | 1.096271137 | 0.025138386 | 1.097624736 |
| 7.391672429 | 0           | 1.560451966 | 0           | 0.97929594  |
| 7.245161142 | 1.370380873 | 2.423333515 | 2.00224517  | 5.681120006 |
| 4.157015972 | 0.09714419  | 0.07390159  | 1.941854093 | 3.013171041 |
| 4.060053941 | 0.011430075 | 1.037782524 | 1.630893064 | 1.038149567 |
| 12.69607967 | 2.729686159 | 1.046151936 | 0           | 8.303803504 |
| 0           | 1.484562514 | 0           | 1.123641216 | 8.091956243 |
| 1.108915379 | 0.033349537 | 1.108165221 | 0.02829937  | 1.718593506 |
| 10.85685865 | 3.558192947 | 0           | 2.866864143 | 7.753040657 |
| 6.747273319 | 3.374074732 | 0.06233264  | 0.067912264 | 5.356249394 |
| 5.066078433 | 4.477026514 | 0.915515385 | 0.468923325 | 8.660426308 |
| 3.407092431 | 1.289697947 | 0.068045731 | 0.07421536  | 2.707092773 |
| 3.237228717 | 2.215383825 | 0.038755385 | 4.312092814 | 8.39956278  |
| 3.610782071 | 6.699143258 | 1.604513555 | 1.605037108 | 6.312761796 |
| 2.852646064 | 1.463954772 | 0.903730808 | 0           | 3.170463453 |
| 6.92105092  | 2.647613674 | 0           | 1.180631475 | 7.021602333 |
| 3.295405527 | 2.4253334   | 0           | 0.750555746 | 8.191511458 |
| 0           | 2.717241731 | 4.994253945 | 0           | 4.535565644 |
| 2.567415438 | 0.055311067 | 0.042914859 | 1.180168336 | 3.85664072  |
| 7.160337475 | 0           | 1.523000561 | 0.947247985 | 6.795288594 |
| 12.16250842 | 0           | 0.979062039 | 2.555823093 | 2.968107413 |
| 5.954310699 | 0.894588135 | 0           | 0.895100235 | 7.291642545 |
| 2.970110671 | 1.880895432 | 0           | 0.697848744 | 7.029482894 |
| 1.741308429 | 0.039509168 | 0.030887643 | 1.130254315 | 0.041368452 |
| 1.347057026 | 2.69888648  | 0           | 0           | 7.972991133 |

| hsa-miR-487a-3p | hsa-miR-499a-3p | hsa-miR-4784 | hsa-miR-380-3p | hsa-miR-506-3p |
|-----------------|-----------------|--------------|----------------|----------------|
| 3.268973949     | 0.098396896     | 0.068978446  | 0.090393448    | 0.076082406    |
| 0.06475726      | 1.227561941     | 0.045722726  | 0.059051786    | 1.831885786    |
| 1.719163678     | 4.161817906     | 1.704168627  | 1.110508772    | 0.02459118     |
| 1.058749846     | 0.016060654     | 1.648181268  | 1.058066961    | 2.069570802    |
| 1.371213234     | 0.106418874     | 0.074261589  | 1.363621897    | 0.081998826    |
| 0.045439284     | 2.206272404     | 8.032831229  | 0.041583586    | 3.004442649    |
| 0.144857346     | 0.142703292     | 1.431348743  | 0.130190463    | 0.108262362    |
| 2.682017889     | 0.019232699     | 0.01413001   | 1.667606045    | 0.015407831    |
| 0.926899736     | 0               | 0            | 1.905590887    | 0              |
| 0.042770117     | 1.152170441     | 0.030608704  | 0.039160233    | 1.143631262    |
| 1.056100692     | 0               | 1.086513236  | 0              | 0.590267316    |
| 2.348421227     | 0.198964266     | 0.131992615  | 0.179952388    | 0.147461125    |
| 1.342732015     | 1.342087002     | 0.068605915  | 0.089884274    | 0.075665694    |
| 3.673205651     | 0               | 1.564964492  | 2.782134295    | 0.982528317    |
| 0.171952946     | 0.16927484      | 2.581332739  | 0.153798549    | 0.126998701    |
| 1.137078103     | 1.136929224     | 1.125498158  | 0.035178283    | 1.12939132     |
| 2.601700816     | 0               | 0            | 3.597251676    | 0              |
| 2.732914654     | 0               | 0.779183325  | 2.210765179    | 0.364543178    |
| 1.886473454     | 2.321123614     | 1.230246419  | 1.250280127    | 0.056107085    |
| 0.219554385     | 1.713085013     | 0.141945438  | 0.194736209    | 0.158895042    |
| 2.653984032     | 0.156398757     | 1.467513928  | 1.519003432    | 2.134341306    |
| 0.258997647     | 1.826183368     | 0.164013295  | 1.800213929    | 0.184399407    |
| 0.0256121       | 1.695294464     | 0.018526981  | 0.023525164    | 0.020221179    |
| 0.133157396     | 0.131217943     | 0.09029909   | 0.119926384    | 0.100035486    |
| 1.448276131     | 0.130001929     | 0.089522852  | 0.118837545    | 0.099159834    |
| 0.693338356     | 1.880133222     | 0.706982893  | 0              | 0              |
| 0               | 0               | 0.980401614  | 0              | 0.979878101    |
| 0.055962577     | 1.197625617     | 1.180023437  | 1.194841784    | 0.043551741    |
| 1.9039138       | 2.339477773     | 0.054060664  | 0.070185512    | 0.059444495    |
| 0.036069833     | 1.738902878     | 0.025921361  | 1.127223447    | 0.028335794    |
| 5.871836285     | 0.49284941      | 0.507944627  | 4.338678647    | 0              |
| 0.99969936      | 0.999699547     | 0.999720876  | 0              | 3.906498452    |
| 1.351191629     | 1.874007325     | 1.936930377  | 0              | 0              |
| 1.285876263     | 0               | 0.770867085  | 0              | 0              |
| 0.087407788     | 1.303365571     | 0.060879982  | 0.079376997    | 0.067037638    |
| 0.246556216     | 0.242241482     | 1.67775459   | 0.21766149     | 0.176441637    |
| 3.700568641     | 5.825204154     | 1.350273558  | 4.59750563     | 1.363510255    |
| 6.511462071     | 0.814614592     | 0            | 4.47380282     | 0.820864777    |
| 0.075612187     | 0.074624918     | 0.053037616  | 0.068813247    | 2.629369743    |
| 1.670158705     | 1.669958954     | 0.014249279  | 1.069977251    | 0.015538277    |
| 0.090633107     | 1.314012199     | 1.282666734  | 1.308670308    | 0.069408565    |
| 1.210612409     | 0.058929265     | 1.191346637  | 0.054475839    | 0.046366538    |
| 1.391802268     | 1.39098401      | 0.078345007  | 0.103272624    | 0.086580319    |
| 2.243436885     | 0.053198545     | 1.17362512   | 1.187813928    | 1.179262248    |
| 6.955390301     | 0               | 0.939400301  | 4.712612708    | 0              |
| 3.34589373      | 0               | 0.929060376  | 0.9247897      | 0              |
| 1.492895571     | 0.143893852     | 0.098329975  | 0.131252355    | 0.109110663    |
| 0.171932053     | 0.169254365     | 0.114073449  | 1.557580549    | 0.126984419    |
| 1.354587551     | 2.778306314     | 0.070961108  | 0.093107275    | 1.328945026    |
| 5.850638168     | 0               | 1.43146545   | 4.43949383     | 0              |
| 1.008819461     | 1.008813724     | 0.001776175  | 1.595419434    | 0.001931743    |
| 1.819761875     | 0               | 0.66925724   | 0.655938594    | 0              |
| 1.791913117     | 2.551345161     | 0.034862625  | 1.171031194    | 2.20053349     |
| 3.686129742     | 0.01904595      | 0.013994412  | 1.666818768    | 0.015259533    |
| 0.012959352     | 3.87596484      | 0.009449796  | 0.01193151     | 0.010294185    |
| 4.673816032     | 4.026650039     | 1.322102028  | 4.815512365    | 0              |

|             |             |             |             |             |
|-------------|-------------|-------------|-------------|-------------|
| 3.225863892 | 0           | 1.100445858 | 0.593264827 | 0           |
| 0           | 2.132545502 | 0           | 0           | 0           |
| 1.213793421 | 0           | 1.628053252 | 0.703572044 | 0           |
| 5.67022997  | 0           | 1.578936284 | 4.374408014 | 1.185392209 |
| 1.1144195   | 2.14695756  | 0.023004106 | 0.029291753 | 2.133860893 |
| 0           | 0           | 1.799287938 | 0.834539339 | 0.839326663 |
| 1.861345746 | 0           | 0.695629592 | 0           | 0           |
| 1.621355991 | 6.437255125 | 1.027899757 | 0.00764609  | 1.028684084 |
| 1.553449738 | 0           | 2.290880798 | 0           | 0           |
| 0.059802125 | 1.210730579 | 2.231463485 | 0.05458292  | 0.046456113 |
| 0.055519776 | 1.817947524 | 1.178670855 | 0.050714279 | 1.184498932 |
| 2.564549451 | 0.985462357 | 1.569074422 | 0.985596169 | 0           |
| 0           | 0.98267522  | 0           | 0           | 0           |
| 1.931032136 | 0.573654664 | 1.076025022 | 0           | 0           |
| 0           | 0           | 0           | 0           | 0           |
| 0.051214567 | 1.181342977 | 0.036461407 | 1.178860357 | 0.039945764 |
| 0.178897311 | 0.176078828 | 0.118238501 | 0.159813034 | 0.131731365 |
| 3.469181993 | 0.001800175 | 1.006158725 | 0.001679507 | 0.001453863 |
| 0.312386255 | 0.306394135 | 0.192545038 | 1.938652831 | 0.217681239 |
| 2.040443438 | 1.031009463 | 0.006247462 | 1.030693207 | 0.006801095 |
| 1.88803337  | 1.88404389  | 1.750416123 | 0.245501081 | 0.197457921 |
| 0.013346694 | 1.643102887 | 1.044663254 | 1.047793452 | 0.010599881 |
| 0.826031785 | 0.826052409 | 0           | 0           | 0           |
| 1.28778098  | 1.287303799 | 0.057671867 | 0.075043273 | 0.063462856 |
| 1.903887752 | 0           | 0.932038738 | 0           | 0           |
| 1.406035148 | 0           | 0.862779632 | 0           | 0           |
| 1.153343029 | 0.042532194 | 0.030808823 | 1.76362245  | 1.144561651 |
| 2.29673406  | 1.975913955 | 1.564839593 | 1.976452728 | 1.564147487 |
| 2.137544776 | 0.867955115 | 0.875788143 | 0.868851869 | 0           |
| 0.062573826 | 0.061778293 | 1.20008985  | 0.057083621 | 0.048546295 |
| 0.204082795 | 0.200734529 | 2.228637019 | 0.181504458 | 0.148665953 |
| 0.134514232 | 1.455421309 | 0.091148386 | 0.121118889 | 0.10099386  |
| 0.677211725 | 1.556692944 | 0           | 0           | 0           |
| 1.263502589 | 1.952829802 | 1.287293122 | 0           | 0           |
| 0           | 4.331946733 | 0           | 0           | 0           |
| 1.101968515 | 0.028061079 | 0.020505152 | 0.026069123 | 1.096510801 |
| 2.276576902 | 1.956658117 | 2.544710914 | 0.967253407 | 0           |
| 2.328633354 | 0.001333473 | 0.000990595 | 2.328430631 | 1.004689209 |
| 0.06222104  | 0.061430571 | 1.199025113 | 1.215759319 | 1.205639102 |
| 0           | 0.883854942 | 0.890905678 | 0           | 0.888275139 |
| 2.479529595 | 0           | 0.791652164 | 0.781394945 | 0           |
| 1.54312725  | 1.543206464 | 0.967914033 | 0.965877837 | 1.545905958 |
| 1.850273863 | 0.062648075 | 0.04483963  | 1.219868232 | 0.049210658 |
| 2.716273992 | 0.316180711 | 0.197761044 | 0.280988694 | 0.223802489 |
| 0           | 1.406557821 | 0           | 0           | 0           |
| 0           | 0           | 0.921346005 | 0           | 0           |
| 1.414466619 | 1.414716735 | 0           | 0.862007838 | 0.866169009 |
| 2.308055352 | 0           | 0           | 1.657290141 | 0           |
| 1.688029569 | 1.687781136 | 0.017256997 | 0.021895232 | 0.01883002  |
| 1.01588117  | 2.343458947 | 0.003198008 | 2.020194934 | 0.003479157 |
| 3.593045427 | 1.092591596 | 0.018639746 | 2.116342867 | 0.02034474  |
| 0.794006881 | 0           | 0.804928121 | 0.795125535 | 1.740574944 |
| 2.737092697 | 0           | 1.535658401 | 1.131274047 | 0           |
| 0.100961864 | 0.09957637  | 0.069758217 | 1.341643342 | 0.076954855 |
| 3.553885837 | 0.753168841 | 0.782685621 | 2.855719795 | 0.367001802 |
| 2.489719363 | 0.78677746  | 0           | 0.787899531 | 0           |
| 0.666096361 | 0           | 0           | 1.546846123 | 0           |
| 0.910434562 | 0           | 0           | 0.911149831 | 0           |



|             |             |             |             |             |
|-------------|-------------|-------------|-------------|-------------|
| 0.056341249 | 1.198920543 | 0.039985256 | 0.051456862 | 1.801829709 |
| 2.811583539 | 1.084926126 | 0.618241146 | 2.549944275 | 0           |
| 0.10606423  | 8.941141461 | 2.716831208 | 0.095993296 | 0.080656897 |
| 1.505646485 | 0           | 1.278476925 | 1.51600805  | 0           |
| 0.071529656 | 1.881118046 | 1.844841244 | 0.065146501 | 0.055263481 |
| 1.119220529 | 0.032895578 | 0.023967388 | 1.11764477  | 0.026189061 |
| 1.680971571 | 1.079805021 | 0.016068358 | 0.020372026 | 0.017528638 |
| 1.350104123 | 0           | 1.689489751 | 0           | 1.018536212 |
| 2.188538335 | 3.364337499 | 1.973591612 | 3.28769693  | 0.264513131 |
| 1.97328441  | 4.455514678 | 0.066053934 | 0.08640251  | 1.306654675 |
| 0.023954813 | 2.111184985 | 0.017346256 | 0.022009705 | 0.018927771 |
| 3.221270271 | 0.08720778  | 0.061529161 | 0.080256037 | 0.067761582 |
| 1.075712448 | 1.07564646  | 1.069755629 | 1.673999319 | 0.016613203 |
| 1.693140454 | 0.208391075 | 0.13756511  | 0.188207822 | 0.153857569 |
| 1.05789882  | 0.015825935 | 0.011651478 | 1.0572271   | 0.012698508 |
| 0           | 0.970897711 | 0.972888482 | 0           | 0           |
| 0.075593043 | 0.074606062 | 0.053024799 | 0.068796065 | 0.058292928 |
| 2.237926657 | 0           | 0           | 1.126371288 | 0           |
| 1.56373725  | 0.982507705 | 0           | 1.564142668 | 0           |
| 0.088457366 | 1.306834132 | 0.061572522 | 0.080314776 | 2.943546694 |
| 0.13460532  | 2.115270825 | 0.091205355 | 1.446241534 | 0.101058157 |
| 4.328543725 | 0           | 0           | 2.437950548 | 0.549798734 |
| 0.689452357 | 1.197287662 | 0           | 0           | 0           |
| 1.40407325  | 1.046651476 | 0           | 1.05046755  | 1.06577503  |
| 1.517308375 | 0.151568436 | 1.454848474 | 1.504366776 | 4.756137186 |
| 3.005011503 | 0           | 0           | 0.89013657  | 0.893588634 |
| 0.105028705 | 1.361098625 | 0.072394891 | 0.095073936 | 1.968428878 |
| 1.246666316 | 0.069396385 | 1.223253203 | 0.06404508  | 3.883745151 |
| 0.018629992 | 1.06721642  | 0.013535906 | 1.066476307 | 0.014758148 |
| 1.631843161 | 0.010590621 | 1.03593627  | 1.630866227 | 0.008518362 |
| 1.221782619 | 0           | 1.247434812 | 0.709789499 | 0           |
| 0.919150272 | 0           | 0.924337661 | 0           | 0           |
| 0.964576817 | 0           | 1.958745539 | 0           | 0           |
| 0.027811936 | 1.099807452 | 0.020090457 | 0.025535301 | 0.021934851 |
| 0.978780685 | 0.978792475 | 0           | 0           | 0           |
| 1.369643448 | 2.459758719 | 0.073950077 | 0.097211047 | 1.342489129 |
| 1.955135481 | 3.227570624 | 0.062909096 | 0.082126916 | 1.292334057 |
| 1.039071903 | 0.010648944 | 0.007865124 | 1.038637491 | 0.008565042 |
| 3.348678891 | 0.564605962 | 1.064161721 | 1.396718766 | 0.573162391 |
| 1.77895059  | 0           | 0.643590834 | 0.629870468 | 0           |
| 0.031333161 | 0.030960681 | 1.103100989 | 0.028749466 | 0.024670409 |
| 3.368496689 | 0.496878005 | 1.864856927 | 3.537879209 | 0.96182169  |
| 1.265569714 | 1.898161443 | 0.05324437  | 1.260972841 | 1.248149576 |
| 2.551010357 | 0.468184491 | 0.934689407 | 1.247335354 | 0           |
| 1.92689348  | 2.363627122 | 0.05802529  | 0.07551986  | 0.063856445 |
| 1.782985099 | 0.046128241 | 0.033341661 | 2.205907098 | 1.156327516 |
| 0.004677638 | 0.004625342 | 0.003428984 | 0.004313321 | 0.003730622 |
| 0           | 0           | 1.475122045 | 0           | 0           |
| 1.175363139 | 0.6726863   | 0           | 0.673774853 | 0           |
| 0.748963553 | 0.74894553  | 0           | 1.66487666  | 0           |
| 1.20199627  | 0.444091437 | 0.901443894 | 0           | 0.45190837  |
| 0.051812194 | 1.183397168 | 0.036873323 | 0.047359964 | 1.172702913 |
| 2.509519603 | 0           | 0           | 1.931316478 | 0           |
| 0           | 1.558833118 | 0.979921963 | 0           | 2.779698158 |
| 0.894034178 | 0           | 1.466994667 | 0.894840493 | 0           |
| 1.205800555 | 2.346478688 | 0.709878996 | 0.697359593 | 0.704345404 |
| 1.74352675  | 0.036642746 | 1.725487697 | 0.03399464  | 0.029122544 |
| 1.341878827 | 0           | 0.813659013 | 1.739810834 | 1.752529956 |

| hsa-miR-346 | hsa-miR-483-5p | hsa-miR-668-3p | hsa-miR-708-5p | hsa-miR-508-5p |
|-------------|----------------|----------------|----------------|----------------|
| 0.073296784 | 0.113799307    | 0.061568564    | 5.023657468    | 0.0898038      |
| 1.210983914 | 12.0565951     | 0.041016408    | 2.627703714    | 1.847602422    |
| 1.104729549 | 3.625550011    | 1.099012712    | 4.925084575    | 2.466547241    |
| 2.879694065 | 11.61012942    | 0.010685772    | 3.085461025    | 1.057999481    |
| 1.339232248 | 5.305913001    | 0.066209705    | 4.111675737    | 1.362976277    |
| 0.034338792 | 6.032893926    | 0.029208492    | 0.048335164    | 1.159072838    |
| 0.104058076 | 3.237672472    | 0.086575698    | 0.156250964    | 0.129275822    |
| 1.662089834 | 3.564349074    | 1.062443033    | 4.106257461    | 0.017792804    |
| 0           | 1.497412767    | 0              | 3.347604164    | 0              |
| 1.141994537 | 1.148021135    | 0.027549534    | 0.04547896     | 1.149992894    |
| 0.592611275 | 1.424503138    | 0              | 2.146120588    | 0              |
| 1.590889192 | 2.35303621     | 1.546646145    | 4.362429808    | 0.1785765      |
| 2.375761437 | 2.432625503    | 0.061240919    | 2.775801397    | 1.335441245    |
| 1.564535247 | 11.11984162    | 0              | 1.975779364    | 0              |
| 2.933344842 | 2.248923292    | 2.114559115    | 2.258821015    | 0.152672618    |
| 0.029120398 | 13.02942828    | 0.024812343    | 1.750022405    | 0.034973635    |
| 0           | 0              | 0              | 3.981886298    | 0              |
| 0           | 6.102711633    | 0              | 4.007668935    | 0.357493667    |
| 0.054131608 | 6.297141602    | 0.04574877     | 3.35889298     | 0.065750785    |
| 2.28915583  | 3.522950391    | 0.124811062    | 0.239338476    | 0.193211712    |
| 0.113311286 | 3.527777111    | 2.513916838    | 0.171647253    | 0.141360383    |
| 0.176306902 | 2.540642421    | 0.143594351    | 0.283925843    | 0.226274244    |
| 0.01956121  | 5.873121774    | 0.016720279    | 0.027169228    | 0.023391841    |
| 0.096207001 | 2.111096614    | 1.382378647    | 2.119760408    | 0.119099327    |
| 1.406747659 | 3.418715096    | 0.079560159    | 4.33122527     | 0.118019625    |
| 3.730765299 | 0.702779015    | 0              | 1.202461813    | 0              |
| 0           | 11.9944842     | 0.981047643    | 2.554903762    | 0              |
| 0.042057198 | 5.662183182    | 0.035683517    | 0.059616576    | 0.050806763    |
| 0.057337484 | 5.836703857    | 0.048408265    | 2.346282569    | 0.069745726    |
| 2.473975857 | 3.185493396    | 0.023354965    | 0.038318516    | 0.032875015    |
| 0           | 2.922540137    | 2.445179409    | 5.525820591    | 0              |
| 2.999620933 | 9.174436522    | 0              | 1.584597023    | 2.584556704    |
| 1.023738824 | 0              | 0.563811624    | 7.073038305    | 0              |
| 0.767850808 | 1.980028104    | 0              | 5.088937625    | 0              |
| 1.279424511 | 2.998011881    | 0.05443441     | 5.839408271    | 0.078870321    |
| 0.168789145 | 2.50021744     | 0.137766264    | 0.269807862    | 0.215896193    |
| 0.08362107  | 11.68490604    | 3.865499601    | 0.123171313    | 1.384086883    |
| 0           | 9.851571579    | 3.090709502    | 0              | 1.359896908    |
| 0.056245161 | 4.642559848    | 0.047502711    | 0.080770623    | 4.258178297    |
| 2.894264378 | 5.812517275    | 0.012872092    | 2.09281252     | 1.668147887    |
| 0.066899706 | 2.397926085    | 0.056309102    | 1.314978656    | 0.08172955     |
| 0.044766092 | 3.47278127     | 0.037948409    | 0.063613491    | 0.054145429    |
| 0.08334712  | 4.146568462    | 0.069789998    | 2.838056209    | 1.382846268    |
| 0.040529922 | 11.3860776     | 0.034404832    | 4.087919207    | 0.048927986    |
| 1.511902258 | 11.04511155    | 4.38194545     | 5.94085327     | 0              |
| 1.908674117 | 0.926473584    | 0.931289248    | 0.924491517    | 0              |
| 0.104867121 | 2.962937499    | 1.414571617    | 1.495242707    | 0.130328504    |
| 0.121891964 | 3.062547349    | 0.100866361    | 0.186164844    | 0.152654668    |
| 0.075422272 | 4.095671996    | 0.063311484    | 0.1102483      | 0.092496719    |
| 0           | 8.417301115    | 2.641716223    | 1.416659966    | 1.419747807    |
| 0.001871274 | 2.011471963    | 1.007904323    | 2.820121151    | 0.002219923    |
| 0.665462004 | 5.226285225    | 1.192853904    | 5.076238793    | 0              |
| 0.036885835 | 1.168706826    | 1.152264736    | 1.173400651    | 1.786312743    |
| 1.06529743  | 3.425055862    | 0.012642583    | 0.020422294    | 1.068645254    |
| 1.044161689 | 5.718470403    | 0.008545728    | 1.046815       | 0.01186568     |
| 0           | 0.777177271    | 4.661333751    | 0.771415976    | 0              |

|             |             |             |             |             |
|-------------|-------------|-------------|-------------|-------------|
| 0           | 4.279576334 | 0           | 4.493631822 | 0           |
| 0           | 5.796342278 | 0           | 0           | 0           |
| 0           | 1.598022935 | 0           | 0           | 0           |
| 0           | 11.34558013 | 2.373024734 | 0           | 1.172007107 |
| 0.024302231 | 5.177913899 | 0.020740022 | 1.114197862 | 1.112778944 |
| 0           | 3.732740944 | 0           | 4.430507493 | 1.383347862 |
| 1.208085649 | 7.896775217 | 0.703055048 | 3.787843804 | 0           |
| 0.006396954 | 4.632208302 | 0.005492112 | 0.008780817 | 1.620546118 |
| 2.290075489 | 2.961733104 | 0           | 3.282851999 | 0           |
| 0.044852279 | 2.874820276 | 0.038020405 | 4.310790756 | 0.054251786 |
| 0.041734132 | 2.250834132 | 0.03541314  | 2.586417284 | 0.050409129 |
| 0           | 6.316289437 | 0.986924057 | 2.564228465 | 0           |
| 0           | 1.564284832 | 0           | 0           | 0           |
| 0           | 2.138692276 | 0.597520921 | 4.156726024 | 0           |
| 0.933709379 | 2.22553052  | 0.936815191 | 5.098396364 | 0           |
| 0.038585262 | 1.176489591 | 0.032774879 | 0.054522413 | 0.046539481 |
| 1.531839629 | 8.255912612 | 0.104460714 | 3.367907603 | 2.689929479 |
| 0.001408404 | 1.592867665 | 1.005950961 | 4.097662669 | 1.006562694 |
| 0.207667214 | 7.351067568 | 0.167662114 | 1.994963111 | 0.270290459 |
| 0.006585774 | 12.7499645  | 0.005653863 | 4.047331706 | 0.007829453 |
| 0.188626977 | 2.607041534 | 0.153095798 | 1.900715686 | 0.243426609 |
| 2.056523264 | 1.642373188 | 0.008798423 | 1.048204322 | 0.012219392 |
| 0           | 2.332378771 | 0           | 0           | 0           |
| 0.06119543  | 7.311365107 | 0.051601598 | 1.288020611 | 0.074568401 |
| 0           | 10.66431383 | 0           | 1.903143971 | 0           |
| 0           | 7.230923294 | 0           | 5.377550926 | 0.855376787 |
| 1.750824243 | 2.797087203 | 0.027728422 | 2.529577059 | 1.763268361 |
| 0           | 3.142487179 | 0           | 3.878589497 | 0.981788353 |
| 0.873928361 | 11.49060953 | 0.879491141 | 1.422749523 | 0.868960389 |
| 1.204247947 | 0.070653744 | 0.03969899  | 2.284448983 | 0.056735488 |
| 0.14248878  | 5.86674503  | 0.117190537 | 2.83281823  | 0.180113215 |
| 0.097122057 | 4.234127854 | 0.080977307 | 1.458335562 | 0.12028179  |
| 1.890726409 | 0.687130471 | 0           | 4.357781951 | 0           |
| 0           | 0.749246376 | 0           | 2.199592172 | 0.742544968 |
| 4.579779077 | 4.220866248 | 0           | 1.571958587 | 0.954717408 |
| 1.696293596 | 6.518764488 | 0.018497346 | 1.101752737 | 1.704272678 |
| 0           | 7.934580205 | 0           | 4.270420083 | 0           |
| 2.327912914 | 6.197748954 | 0.000897547 | 5.293093852 | 1.004862807 |
| 0.046607459 | 2.885853338 | 0.039485725 | 1.219192384 | 0.056419508 |
| 0           | 0           | 0           | 3.816887654 | 0           |
| 0           | 10.29624554 | 2.055576612 | 4.282807235 | 0           |
| 3.125834415 | 5.725585271 | 1.548708169 | 1.95431354  | 0           |
| 0.047502077 | 1.847642318 | 1.806840279 | 0.067670368 | 0.057525709 |
| 0.213421069 | 4.122401621 | 0.172036574 | 3.225511077 | 0.278493828 |
| 0           | 0.858975719 | 0           | 0           | 0           |
| 0           | 1.889575186 | 0           | 2.204331008 | 1.484321819 |
| 0           | 11.61631084 | 0           | 4.361744206 | 2.39135731  |
| 3.289636886 | 11.54712555 | 0.874092937 | 3.659905284 | 0.413002178 |
| 1.678911815 | 3.587266032 | 0.015578578 | 3.124221694 | 0.021771607 |
| 0.003369855 | 4.609925749 | 0.002896157 | 2.343832144 | 0.004000419 |
| 2.432189061 | 9.364584616 | 0.016821622 | 4.785107753 | 1.091406208 |
| 0           | 2.284197627 | 0           | 2.684551854 | 0.795270683 |
| 2.079598534 | 0           | 0.658306854 | 4.180490293 | 0           |
| 4.210101505 | 5.881068184 | 0.062254216 | 2.444338255 | 1.34105268  |
| 1.599911649 | 7.100044261 | 1.84903421  | 5.946864243 | 1.333740721 |
| 0           | 4.232021116 | 0           | 3.563680091 | 0.788047405 |
| 2.126512309 | 2.784624073 | 0           | 4.980240861 | 0.667260673 |
| 0           | 1.882211602 | 1.489440695 | 1.47533628  | 0.911229687 |

|             |             |             |             |             |
|-------------|-------------|-------------|-------------|-------------|
| 1.798634901 | 5.211469018 | 0.035914593 | 1.199053463 | 2.245181582 |
| 0           | 9.051099068 | 2.78132111  | 5.999678    | 0           |
| 1.333904289 | 0.121197854 | 0.065158779 | 0.113784459 | 0.095360304 |
| 2.179813017 | 6.299374632 | 0           | 4.590052992 | 0           |
| 2.875955763 | 0.080963802 | 0.045075468 | 0.076365968 | 1.246187555 |
| 0.025323001 | 2.482675954 | 1.105327125 | 4.085108418 | 0.030360843 |
| 0.016959973 | 3.820964167 | 0.014509419 | 0.023501295 | 1.078808621 |
| 0           | 11.90729986 | 0           | 4.304790773 | 1.885254753 |
| 0.251581672 | 2.19218971  | 0.200741559 | 0.437262803 | 0.333906785 |
| 0.070163478 | 2.757034043 | 0.058995063 | 0.102061448 | 0.085843273 |
| 0.018311791 | 2.438656617 | 1.076516566 | 0.025405323 | 1.085069703 |
| 1.282339206 | 6.533357442 | 0.055007181 | 2.730289847 | 0.079742853 |
| 0.016075342 | 3.69868284  | 1.06727034  | 4.284802366 | 0.01919311  |
| 1.614659333 | 5.063264348 | 1.568086792 | 3.489473151 | 0.186749597 |
| 0.012291006 | 2.074930231 | 1.05156233  | 2.075984814 | 1.057160686 |
| 0           | 3.540393036 | 0           | 0.970993925 | 0.971185471 |
| 3.63339336  | 6.449504004 | 0.047491364 | 0.080749957 | 0.068366205 |
| 0           | 3.619472622 | 0           | 3.545669629 | 0           |
| 0.98344768  | 4.220481979 | 0.984260656 | 5.700335085 | 0           |
| 4.166437316 | 1.94476956  | 0.055045433 | 2.730569454 | 3.201407348 |
| 0.097183444 | 4.986312065 | 0.081026957 | 4.64610637  | 2.097838727 |
| 0           | 10.94523578 | 0.565527504 | 2.074840851 | 0.542136561 |
| 1.217754681 | 8.124480151 | 0           | 5.576587431 | 0.690675854 |
| 0.58532065  | 10.23852782 | 0           | 4.204903007 | 1.050896043 |
| 0.110061051 | 4.434065909 | 0.091402564 | 0.166208871 | 5.044377457 |
| 0           | 4.773948746 | 0.89927016  | 4.909705602 | 0.89023139  |
| 0.076959981 | 3.836256896 | 0.064571004 | 2.014850712 | 3.039159114 |
| 2.275956592 | 12.26690381 | 0.044344208 | 1.246698276 | 3.494327576 |
| 0.014282337 | 2.41319623  | 1.059837724 | 1.666350121 | 0.017038558 |
| 1.036576551 | 5.616386168 | 1.034692017 | 4.307439937 | 0.009812466 |
| 1.936540229 | 1.229626038 | 0.729029526 | 3.686930026 | 0           |
| 0           | 3.198805062 | 0           | 0.919508356 | 0           |
| 0.966449613 | 1.542653762 | 0.968071527 | 0.964715338 | 0.964939912 |
| 0.021216227 | 1.703221048 | 1.088483822 | 1.70555611  | 0.025389924 |
| 0           | 7.651884486 | 0           | 0           | 0.979006031 |
| 0.078628501 | 5.303707386 | 0.065936329 | 3.512582777 | 1.361460101 |
| 0.066796621 | 3.771145718 | 0.056224178 | 0.096861313 | 0.081599815 |
| 1.036776112 | 5.79016961  | 0.007115214 | 1.038955501 | 1.038593987 |
| 0           | 11.83152632 | 0.58858744  | 5.743919801 | 0           |
| 0           | 0           | 0           | 5.160044256 | 0           |
| 0.023857278 | 1.717827456 | 0.020363296 | 1.112105637 | 0.028584598 |
| 0           | 10.43102063 | 0           | 5.802403779 | 0.946442957 |
| 0.056465892 | 6.867175774 | 0.047685751 | 3.968127432 | 0.068658477 |
| 0           | 4.499928922 | 0           | 4.847606253 | 0           |
| 0.061573187 | 2.705310157 | 1.25014326  | 2.707664209 | 0.075041513 |
| 0.03526976  | 1.780687068 | 0.029991203 | 5.107806763 | 0.042476839 |
| 2.605964131 | 3.485106688 | 0.003105169 | 4.113569957 | 0.004289949 |
| 0           | 2.184888426 | 0           | 0           | 0           |
| 0           | 6.551315178 | 0           | 3.266232896 | 0           |
| 0           | 2.613906945 | 0.767593361 | 4.581542317 | 0           |
| 0.454384336 | 0.887544975 | 0           | 2.608912684 | 0           |
| 0.03902322  | 1.80127559  | 0.03314214  | 1.805415463 | 1.180624242 |
| 0           | 7.497279369 | 0.95178737  | 3.503220145 | 0.947155061 |
| 0           | 10.87534134 | 0           | 1.971418813 | 0           |
| 0           | 4.996896659 | 0           | 4.15395045  | 0           |
| 0           | 2.527517092 | 0.717079947 | 3.883874957 | 0           |
| 0.028153309 | 0.041589386 | 0.02399599  | 0.039407144 | 1.130561457 |
| 0.811069848 | 2.29788121  | 0           | 6.87320453  | 2.306654376 |

| hsa-miR-380-5p | hsa-miR-3681-5p | hsa-miR-376a-3p | hsa-miR-802 | hsa-miR-202-5p |
|----------------|-----------------|-----------------|-------------|----------------|
| 1.345538957    | 0.082856021     | 2.439168465     | 0.105631328 | 2.725547866    |
| 0.066653624    | 0.054406307     | 0.068767749     | 3.321294981 | 0.052654591    |
| 1.112057961    | 3.315870949     | 2.474255821     | 1.111910008 | 1.107405133    |
| 1.058775386    | 0.013874993     | 0.017145361     | 0.017039464 | 0.013465606    |
| 2.023610876    | 0.089392741     | 2.471946491     | 0.114374866 | 1.350103403    |
| 1.161802652    | 0.038423257     | 0.04813257      | 1.161632028 | 0.037226668    |
| 1.491081832    | 0.118571626     | 1.491521293     | 0.154175227 | 0.114262513    |
| 2.091621462    | 0.01659863      | 3.10184038      | 1.669915639 | 0.016105849    |
| 2.892041411    | 0               | 0               | 0           | 0              |
| 0.043963273    | 1.147149043     | 1.152228184     | 0.04499152  | 0.035076691    |
| 0.582672506    | 2.676648796     | 0               | 0           | 0.587398788    |
| 2.356438205    | 0.16260966      | 1.670279685     | 0.216714627 | 0.156250983    |
| 3.043758588    | 3.884130728     | 0.105806343     | 0.105018513 | 0.079592803    |
| 3.432094453    | 0               | 4.829388319     | 0.981742181 | 0              |
| 0.178155671    | 0.139548455     | 0.185174511     | 7.243127079 | 0.13429223     |
| 1.137215053    | 1.132511059     | 2.507806335     | 1.749999274 | 1.131286296    |
| 3.564813373    | 0               | 3.409803693     | 0           | 0              |
| 3.538138209    | 1.567468095     | 3.67635661      | 1.726217892 | 2.374140149    |
| 2.659327548    | 0.060885818     | 1.889267338     | 0.076695253 | 0.058899603    |
| 1.720289077    | 0.175564385     | 0.237920162     | 0.235699947 | 0.168558738    |
| 2.207950492    | 2.156948082     | 2.668029956     | 1.535758327 | 0.124631541    |
| 1.836124812    | 0.204637158     | 0.28212834      | 0.279317815 | 0.196108554    |
| 1.092177913    | 1.690204695     | 1.091968928     | 0.026889594 | 0.021147993    |
| 0.137632897    | 0.109403187     | 0.142669557     | 0.141532092 | 0.105491112    |
| 1.449920035    | 0.108428837     | 0.141319917     | 2.565226062 | 2.064436617    |
| 0.693819505    | 0               | 0               | 0.694700401 | 0              |
| 1.559327357    | 0.979471512     | 0               | 0           | 0              |
| 0.057570332    | 0.047155303     | 2.588199135     | 0.058958034 | 0.045659556    |
| 1.270217129    | 0.064545837     | 1.269941793     | 0.081467954 | 0.062424771    |
| 0.037060835    | 2.155746181     | 0.038161396     | 7.206792735 | 1.729728098    |
| 4.543935089    | 0               | 7.351346292     | 2.462532534 | 0              |
| 2.584538176    | 1.584614224     | 1.9996029       | 4.321465281 | 0              |
| 1.350359535    | 0               | 1.350805672     | 0           | 0.545126892    |
| 1.976615906    | 0               | 2.22711057      | 0           | 2.253208368    |
| 1.30460232     | 0.072888956     | 0.09309478      | 0.092418522 | 1.287911112    |
| 1.799942147    | 0.195539987     | 0.268134335     | 0.265516691 | 1.726854297    |
| 5.509163315    | 0.094781031     | 4.884941672     | 0.121629271 | 0.091480598    |
| 5.372421186    | 0               | 5.739337045     | 0           | 0              |
| 0.077878259    | 0.063298096     | 0.080408268     | 0.07983876  | 0.061223196    |
| 1.070859396    | 0.016739551     | 1.670631919     | 1.670629857 | 1.665200392    |
| 1.315335245    | 0.075498606     | 0.096570477     | 0.09586417  | 1.297815576    |
| 0.06141217     | 0.05022827      | 1.837368651     | 0.062904895 | 1.200767377    |
| 1.393030239    | 0.094463796     | 0.122138942     | 0.121200986 | 0.091176337    |
| 1.190977273    | 0.045424668     | 2.246666414     | 0.056740995 | 0.043989004    |
| 6.202186528    | 0               | 7.086387748     | 0           | 0              |
| 2.696790371    | 0               | 2.475816801     | 0           | 0              |
| 1.494917975    | 0.119518482     | 0.156769637     | 3.843944925 | 0.115167776    |
| 2.253562463    | 0.139532415     | 0.185151503     | 0.183563057 | 0.134276935    |
| 0.106072976    | 4.247032287     | 0.109724182     | 0.108901033 | 0.082387545    |
| 6.562436982    | 0               | 5.7776714       | 2.385878038 | 0              |
| 1.008820331    | 0.002075982     | 3.012929705     | 0.002533417 | 0.002016378    |
| 0.655572888    | 0.659023727     | 2.454632186     | 5.427779735 | 2.0952444      |
| 2.82310501     | 0.041300918     | 2.556209772     | 0.05147489  | 0.040006843    |
| 2.681978922    | 0.016438431     | 2.682727796     | 0.020215306 | 2.896359386    |
| 1.046966577    | 0.011079553     | 0.013669861     | 0.013586112 | 0.010754727    |
| 5.730950886    | 0.773793214     | 6.091995277     | 0           | 0              |

|             |             |             |             |             |
|-------------|-------------|-------------|-------------|-------------|
| 2.654686549 | 0           | 3.21458807  | 1.070988559 | 0.598138761 |
| 0.864133776 | 0           | 0           | 0           | 0           |
| 1.213486409 | 0           | 1.890422057 | 1.591110089 | 1.226487483 |
| 6.421937915 | 0           | 6.867430084 | 1.835303263 | 0           |
| 2.47649867  | 5.195734772 | 1.11427122  | 0.033544398 | 0.026296856 |
| 0           | 0.836638871 | 1.379804175 | 1.379722133 | 2.579973321 |
| 0.682285858 | 5.186227402 | 2.316173883 | 5.626081361 | 1.20012528  |
| 1.030149681 | 2.846936449 | 3.214390002 | 0.0086942   | 0.00689885  |
| 1.965710987 | 0           | 1.965599449 | 0           | 0           |
| 0.061534677 | 0.050326111 | 1.211040293 | 4.632847898 | 3.586259867 |
| 2.25240458  | 0.046789105 | 0.058887511 | 0.05848857  | 1.187360043 |
| 3.148490975 | 1.568075079 | 4.784654276 | 0.985482691 | 3.680927539 |
| 0           | 1.978457572 | 0.982716846 | 0           | 0           |
| 2.475447602 | 2.167878871 | 1.92701208  | 0           | 0           |
| 2.705725218 | 0           | 1.907030901 | 0           | 0           |
| 1.181812844 | 0.043223063 | 0.054290819 | 1.181641389 | 0.041863268 |
| 0.185429471 | 2.217939633 | 1.598410504 | 0.191152996 | 2.984962217 |
| 1.006638638 | 0.001562285 | 4.010160081 | 0.001906006 | 0.001517484 |
| 0.326454173 | 4.388181444 | 0.342704147 | 0.338994394 | 0.23225637  |
| 2.040682121 | 0.007315353 | 1.030957776 | 0.00895228  | 2.0377044   |
| 1.895592327 | 0.219616218 | 0.305496234 | 1.899769932 | 0.210265253 |
| 0.013694283 | 0.011409201 | 0.014079145 | 0.013992806 | 0.011074457 |
| 1.765522614 | 0           | 1.765105012 | 0           | 0           |
| 1.288416463 | 0.068958327 | 2.705013876 | 1.288328337 | 1.90018829  |
| 1.4961237   | 0           | 1.903154257 | 0           | 0           |
| 2.781441089 | 2.128711344 | 1.405730814 | 5.933557313 | 2.609567168 |
| 3.388678221 | 1.75858443  | 4.134208138 | 0.045295224 | 2.181745322 |
| 2.97311286  | 0           | 2.558724239 | 5.015665027 | 0.982201506 |
| 3.120703818 | 0           | 3.379364487 | 0.868337571 | 1.430272383 |
| 1.220827516 | 0.052610055 | 1.22052012  | 0.065973038 | 0.050922385 |
| 2.362461723 | 0.163972426 | 0.220704325 | 0.21869894  | 1.61873849  |
| 1.458213511 | 0.110469918 | 0.144148875 | 0.14299657  | 1.428028347 |
| 1.554903557 | 0.681259838 | 1.181527095 | 0           | 0           |
| 1.26314161  | 0.745141271 | 1.263523656 | 0           | 0.746538543 |
| 0           | 0           | 0           | 0.505837158 | 0.508273708 |
| 2.459926211 | 0.024150294 | 1.708040168 | 0.029822289 | 2.712979524 |
| 2.75956364  | 0.967769022 | 1.544671838 | 3.272270816 | 0.968013195 |
| 2.006469388 | 2.006085124 | 3.177215019 | 0.001411773 | 1.004748914 |
| 1.21962256  | 0.052319583 | 0.066052699 | 0.065598439 | 0.050642231 |
| 1.442402625 | 7.944773303 | 1.44241685  | 9.226759513 | 0           |
| 1.312704808 | 0           | 2.662721318 | 1.31282026  | 3.270774879 |
| 1.954464848 | 1.544854613 | 2.757163579 | 0           | 0           |
| 0.06530936  | 0.053336358 | 1.852558241 | 0.066910212 | 0.051622842 |
| 2.733123087 | 0.250026106 | 2.023099624 | 0.350324475 | 0.238928613 |
| 0           | 3.961945097 | 0.855122432 | 0           | 0.858302413 |
| 1.888178518 | 4.130124844 | 0.916290772 | 0           | 0           |
| 2.383824566 | 0           | 2.125834962 | 0           | 1.422036718 |
| 3.023959199 | 0.836565855 | 2.160695276 | 0.829560807 | 0           |
| 1.085846438 | 2.429755086 | 1.085648424 | 2.929620439 | 7.11145838  |
| 1.015883474 | 5.802948222 | 2.020936819 | 3.608848825 | 1.603114576 |
| 3.303630853 | 0.021936584 | 4.784806596 | 5.047741333 | 0.021277494 |
| 1.33007021  | 0           | 3.372452326 | 0           | 1.340655553 |
| 2.987361138 | 0           | 3.095091154 | 5.322490025 | 0           |
| 0.10414944  | 1.332999286 | 0.107720666 | 0.106915633 | 0.080959641 |
| 4.025941092 | 0           | 5.557822964 | 0.364035161 | 0           |
| 2.675287127 | 0           | 3.123060079 | 0           | 0           |
| 1.538743747 | 0           | 2.079999541 | 6.76519051  | 2.679775294 |
| 0.910480052 | 0.912431671 | 0.910771669 | 5.965452221 | 0           |

|             |             |             |             |             |
|-------------|-------------|-------------|-------------|-------------|
| 1.823170267 | 0.04746838  | 1.823842382 | 1.823772817 | 1.80611756  |
| 3.574400538 | 0           | 4.118548863 | 0.605392465 | 0.609054801 |
| 0.109447137 | 0.087908941 | 0.113239876 | 0.112384662 | 1.98035579  |
| 2.762838123 | 0           | 0.898589327 | 0.466089224 | 0           |
| 1.251274892 | 0.059961347 | 0.076026429 | 0.075492724 | 1.238449518 |
| 2.482873544 | 0.028267877 | 3.496270258 | 2.15524378  | 0.027406621 |
| 0.022754568 | 0.01889056  | 0.023408098 | 0.023261417 | 0.018326837 |
| 0.999213855 | 1.367722229 | 1.631406632 | 1.000184832 | 1.662580258 |
| 2.931210867 | 0.297513423 | 2.952899536 | 0.428624117 | 0.283488471 |
| 1.975864696 | 0.079249328 | 2.420982801 | 0.100833582 | 3.203811938 |
| 0.024594673 | 2.105003593 | 0.025304135 | 1.08616611  | 0.019792603 |
| 1.307879705 | 0.073685562 | 1.950928911 | 1.307823873 | 1.29093732  |
| 1.676369267 | 0.017901047 | 2.099136335 | 4.113886248 | 2.091148863 |
| 1.697449436 | 2.313959968 | 2.395360981 | 0.227292956 | 0.163132961 |
| 1.654962872 | 1.651449564 | 0.016894162 | 0.016789878 | 0.013269988 |
| 0           | 3.130514194 | 0.970972648 | 0           | 0           |
| 0.07785845  | 2.642089771 | 0.08038771  | 0.079818372 | 1.251219843 |
| 2.417657472 | 2.265722155 | 3.08820185  | 3.832142549 | 0           |
| 0           | 0           | 0           | 5.830549148 | 1.56484871  |
| 0.091180204 | 2.690847801 | 0.094225516 | 1.308043202 | 0.07127143  |
| 0.139141839 | 0.110541498 | 0.144248204 | 1.458898634 | 1.42829019  |
| 4.146588799 | 0.545123975 | 4.311022764 | 1.003433203 | 0           |
| 2.119243303 | 0.693490723 | 2.957269589 | 3.297643389 | 0           |
| 2.985209777 | 0           | 3.179881593 | 0.576713712 | 1.965304221 |
| 1.519557166 | 0.125606293 | 0.165334266 | 0.163962596 | 0.120985539 |
| 3.154107271 | 0           | 2.643754052 | 0           | 1.861360469 |
| 1.362842975 | 0.087079994 | 0.11211916  | 4.840752487 | 5.024142003 |
| 0.072387962 | 4.014153515 | 0.074712385 | 0.07418931  | 1.234583796 |
| 2.087796839 | 0.015896875 | 2.414003397 | 0.019543646 | 0.015425676 |
| 2.050893487 | 2.047754517 | 2.37532345  | 4.146487746 | 0.008897785 |
| 2.860203965 | 3.649804094 | 0.710299982 | 2.710129059 | 1.619721326 |
| 0           | 0.9209853   | 0.919447203 | 0           | 0           |
| 0.964583313 | 0           | 0.964689335 | 0           | 0           |
| 0.028561583 | 2.121323287 | 0.029393196 | 0.029206489 | 0.022944351 |
| 1.559139809 | 0           | 0           | 0           | 0           |
| 2.466401194 | 1.352740756 | 0.114725441 | 0.113856572 | 1.348660089 |
| 2.39857425  | 4.200608033 | 1.959040631 | 0.095707678 | 0.072849919 |
| 2.051170722 | 0.009215613 | 0.011358433 | 1.039017944 | 0.008946588 |
| 3.069853194 | 0           | 3.251106487 | 0           | 0           |
| 1.118155413 | 0           | 0.631222596 | 1.484212061 | 0           |
| 0.032184671 | 0.026621412 | 1.720446625 | 0.03291751  | 0.025813241 |
| 5.279029404 | 2.032267462 | 4.912961839 | 0.943962922 | 0.956332923 |
| 1.901048561 | 0.063550176 | 3.700801068 | 0.080167728 | 1.252247298 |
| 1.943085408 | 0           | 2.768663782 | 0.471338686 | 0.473242896 |
| 1.29019875  | 0.069390854 | 1.930318105 | 0.087815098 | 1.274592691 |
| 2.544534806 | 1.160209517 | 1.165893403 | 0.049150149 | 1.158682687 |
| 1.605618935 | 0.004010484 | 1.016984891 | 1.017000731 | 2.020750495 |
| 1.463897275 | 0           | 0.901567287 | 0           | 0           |
| 2.487651676 | 0.676813726 | 3.699051758 | 0           | 0.67839384  |
| 1.657735347 | 0           | 2.211771152 | 0           | 1.284918123 |
| 1.471705849 | 0.880218201 | 0.448075995 | 0           | 0           |
| 0.053287145 | 2.219500162 | 1.183571893 | 0.054559594 | 0.042341873 |
| 3.504211545 | 0           | 3.503328941 | 0           | 0           |
| 0           | 0           | 1.558681645 | 0           | 0.979131291 |
| 1.455052009 | 1.865894372 | 0           | 0.89434026  | 0           |
| 1.582495819 | 0           | 1.582247224 | 1.582194578 | 1.218619316 |
| 0.038110702 | 1.128146037 | 1.744598209 | 0.038990341 | 0.030485885 |
| 0.803275793 | 0.80652351  | 3.493191092 | 2.041450693 | 0           |

| hsa-miR-211-5p | hsa-miR-1911-5p | hsa-miR-200c-5p |
|----------------|-----------------|-----------------|
| 1.343246957    | 0.100769154     | 0.084893479     |
| 0.063173074    | 0.06536555      | 0.055666939     |
| 0.030519399    | 0.031503584     | 0.027113215     |
| 1.0586411      | 0.016384257     | 0.014168177     |
| 2.017278488    | 0.109025601     | 0.091619962     |
| 1.161198056    | 0.045848687     | 0.03928273      |
| 1.486571524    | 0.146447907     | 0.121696849     |
| 3.098741       | 1.070257028     | 0.016951651     |
| 1.496162029    | 0               | 0.928250589     |
| 1.765926165    | 0.043153203     | 1.148069005     |
| 0.581616662    | 3.294252893     | 0               |
| 1.660059358    | 0.204723854     | 1.629264412     |
| 2.761510931    | 0.100189998     | 0.084420392     |
| 0.981730239    | 0               | 2.298173339     |
| 0.16683706     | 0.17393313      | 1.545282917     |
| 0.037501429    | 0.038730468     | 0.033257652     |
| 0              | 0               | 0               |
| 1.062001578    | 0.75012034      | 0.359051769     |
| 0.070853534    | 0.073353567     | 0.062316327     |
| 3.702459734    | 6.113890135     | 0.180680258     |
| 4.702884167    | 3.702918339     | 1.507910881     |
| 2.516715239    | 0.262424969     | 0.210886827     |
| 1.091925235    | 0.025832773     | 0.022272309     |
| 1.450016377    | 0.134588669     | 0.112237313     |
| 0.128253021    | 1.44892566      | 0.111232508     |
| 2.343063675    | 0               | 1.210244876     |
| 1.972507074    | 0               | 0               |
| 3.271278072    | 0.056478487     | 0.048230783     |
| 1.268757942    | 0.077885192     | 0.066074145     |
| 2.164724506    | 0.036388105     | 0.031269163     |
| 0.492696235    | 2.718165696     | 4.280489259     |
| 1.999608838    | 0.999699289     | 0.999705807     |
| 0              | 0.999948217     | 0.542313383     |
| 3.209742482    | 0               | 0               |
| 3.735079615    | 0.088268109     | 0.074645156     |
| 1.787731867    | 4.727641987     | 0.2014264       |
| 0.111586106    | 0.115866179     | 0.097167828     |
| 0.814676426    | 0               | 0               |
| 0.073721561    | 1.898646736     | 0.064792914     |
| 3.802514181    | 0.019790933     | 0.017095689     |
| 0.088299249    | 0.091530969     | 0.0773275       |
| 1.209999156    | 1.210770754     | 0.051381578     |
| 0.111200523    | 0.115462569     | 0.096841119     |
| 0.052582475    | 0.054365455     | 0.046456732     |
| 1.914793227    | 0               | 0               |
| 0              | 0               | 0               |
| 4.236424149    | 2.610046742     | 2.122962272     |
| 0.166816963    | 0.173911925     | 0.14335365      |
| 2.439798599    | 5.14086974      | 0.087414012     |
| 3.492601442    | 0               | 0               |
| 1.008805968    | 0.002439181     | 0.002118607     |
| 0              | 1.523168983     | 0               |
| 7.324402979    | 8.079564081     | 0.042230735     |
| 2.41502215     | 0.019432437     | 0.016787913     |
| 1.046866693    | 0.013067749     | 0.011312101     |
| 0              | 0               | 0               |



|             |             |             |
|-------------|-------------|-------------|
| 1.432596299 | 0           | 0           |
| 6.198483081 | 0           | 0           |
| 0           | 1.592093253 | 2.729046003 |
| 0           | 0           | 0           |
| 1.114164863 | 1.114477126 | 0.027712324 |
| 0           | 3.826536245 | 0           |
| 4.834551617 | 0           | 0           |
| 1.030092254 | 0.00836616  | 0.007252961 |
| 0           | 0           | 0           |
| 1.834252071 | 0.060357988 | 0.051481913 |
| 5.323289888 | 0.056031116 | 0.047855374 |
| 0.985474111 | 0           | 0           |
| 0           | 4.497240184 | 0           |
| 1.046003675 | 1.402564383 | 0           |
| 0           | 2.485724911 | 0           |
| 0.049996325 | 0.051681878 | 0.044200328 |
| 1.590567358 | 0.180982008 | 2.225330038 |
| 0.001781607 | 1.593005023 | 0.001594322 |
| 0.300981613 | 0.31684827  | 1.910404256 |
| 0.008358681 | 0.008614303 | 0.007467499 |
| 3.892968196 | 0.283497332 | 0.226480707 |
| 0.013054595 | 1.048359089 | 1.047206474 |
| 0           | 3.315872499 | 0           |
| 1.922577994 | 0.083367293 | 0.070606304 |
| 0.927396901 | 0.927315625 | 0           |
| 0           | 0           | 0           |
| 1.152960086 | 0.043443318 | 0.037249732 |
| 1.562726188 | 1.975797142 | 0           |
| 0           | 0           | 0.870061729 |
| 0.061049871 | 1.220635706 | 0.053824332 |
| 0.197692068 | 0.206562465 | 0.168658352 |
| 3.171431739 | 0.135963701 | 0.113337493 |
| 0           | 0           | 0           |
| 0           | 6.382551611 | 0           |
| 3.388041507 | 0.503480557 | 0           |
| 2.457670718 | 0.028642671 | 0.024673137 |
| 2.276891728 | 0           | 0           |
| 0.001319734 | 0.001359396 | 1.004811893 |
| 0.060706772 | 0.062802374 | 0.053526395 |
| 0           | 0.883823573 | 0           |
| 1.313761786 | 0           | 0           |
| 0.965601356 | 0           | 0           |
| 2.281828711 | 1.223641758 | 0.05456934  |
| 0.310522535 | 0.327117785 | 1.93443588  |
| 1.406839457 | 0           | 0           |
| 0           | 0           | 0           |
| 0           | 0           | 0.863265523 |
| 0           | 0           | 6.720533981 |
| 1.085618635 | 0.02403414  | 0.020733302 |
| 3.022584816 | 0.004397404 | 2.019775859 |
| 4.942123646 | 1.092719505 | 0.022409049 |
| 0.794072616 | 0           | 0           |
| 0.635592868 | 0           | 0           |
| 1.347145246 | 0.101982714 | 1.972561367 |
| 0.359832699 | 0           | 0           |
| 2.996394526 | 0           | 0.789584477 |
| 2.086609715 | 0           | 0.669142601 |
| 0           | 5.070085231 | 0           |

|             |             |             |
|-------------|-------------|-------------|
| 3.077717957 | 0.056861073 | 2.568964902 |
| 0           | 0           | 0           |
| 2.78879151  | 0.107147392 | 0.090092718 |
| 0.462711563 | 0           | 0           |
| 7.50107456  | 0.072211172 | 1.86753408  |
| 0.032531041 | 0.03358502  | 0.028885735 |
| 0.021670077 | 0.022354469 | 0.019294515 |
| 0           | 0           | 0.541598913 |
| 0.375606178 | 0.397544357 | 0.307903446 |
| 3.01712813  | 0.096233245 | 0.081183879 |
| 1.086061856 | 0.024160418 | 0.020841409 |
| 0.086125305 | 0.089263341 | 0.075463881 |
| 0.020528042 | 0.021174603 | 1.672355399 |
| 0.20519438  | 0.214518097 | 0.174753209 |
| 2.888086496 | 0.01614463  | 0.013962018 |
| 6.51080402  | 2.543875079 | 0           |
| 0.073702967 | 0.076319367 | 1.255682585 |
| 1.491265617 | 1.489375774 | 0           |
| 0           | 0           | 0           |
| 4.423254454 | 0.089329858 | 0.075518584 |
| 2.113091337 | 0.136056013 | 0.113411322 |
| 0.5412066   | 0           | 1.01093706  |
| 0           | 0           | 0           |
| 0.574313752 | 0.574768358 | 0           |
| 0.149450345 | 0.155610328 | 0.128960383 |
| 0.88939705  | 0           | 0           |
| 0.102249252 | 0.106099138 | 1.348106449 |
| 0.068565194 | 0.070972661 | 0.06033781  |
| 0.018217306 | 0.018787921 | 1.065637621 |
| 3.377706441 | 0.010801223 | 0.009356792 |
| 0           | 0.708786269 | 0.711756528 |
| 0.919230294 | 0           | 0           |
| 0.964621359 | 0           | 1.955450339 |
| 0.027183007 | 0.028052779 | 0.024169473 |
| 0           | 0.97877667  | 0           |
| 1.368109822 | 0.108536536 | 0.09122245  |
| 1.312920771 | 0.091382822 | 0.077205826 |
| 1.039004591 | 0.010860736 | 0.009408169 |
| 0           | 0           | 5.075195187 |
| 0.62885654  | 1.484972023 | 0           |
| 0.03061906  | 3.330099786 | 0.027201072 |
| 1.286550577 | 5.097071552 | 5.224658749 |
| 1.264686622 | 0.076651023 | 6.272074979 |
| 1.949723321 | 0           | 0           |
| 0.080986361 | 0.083905776 | 1.279592524 |
| 1.165557636 | 0.047124378 | 0.040359703 |
| 0.004577312 | 0.004715993 | 0.004093223 |
| 4.171598009 | 0           | 0           |
| 3.638121798 | 0           | 0           |
| 1.274033385 | 0.749024051 | 0.751940242 |
| 2.37774071  | 7.080607511 | 0           |
| 0.050578186 | 1.80411198  | 1.178214547 |
| 0           | 0           | 1.522207669 |
| 0.978449018 | 0           | 0           |
| 3.013653454 | 0           | 0.895855364 |
| 0           | 0           | 1.899648091 |
| 4.891217373 | 0.037417326 | 1.128929034 |
| 1.342517393 | 0.803092613 | 0           |

Table S5. GO annotation of the target genes

| ONTOLOGY ID | Description | GeneRatic                                                   |        |
|-------------|-------------|-------------------------------------------------------------|--------|
| BP          | GO:0009410  | response to xenobiotic stimulus                             | 9/115  |
| BP          | GO:0035690  | cellular response to drug                                   | 10/115 |
| BP          | GO:0034116  | positive regulation of heterotypic cell-cell adhesion       | 3/115  |
| BP          | GO:0042448  | progesterone metabolic process                              | 3/115  |
| BP          | GO:0014074  | response to purine-containing compound                      | 6/115  |
| BP          | GO:0051591  | response to cAMP                                            | 5/115  |
| BP          | GO:0034114  | regulation of heterotypic cell-cell adhesion                | 3/115  |
| BP          | GO:0003018  | vascular process in circulatory system                      | 6/115  |
| BP          | GO:0070371  | ERK1 and ERK2 cascade                                       | 8/115  |
| BP          | GO:0048147  | negative regulation of fibroblast proliferation             | 3/115  |
| BP          | GO:0071466  | cellular response to xenobiotic stimulus                    | 6/115  |
| BP          | GO:0007596  | blood coagulation                                           | 8/115  |
| BP          | GO:0007599  | hemostasis                                                  | 8/115  |
| BP          | GO:0050817  | coagulation                                                 | 8/115  |
| BP          | GO:0042554  | superoxide anion generation                                 | 3/115  |
| BP          | GO:0046683  | response to organophosphorus                                | 5/115  |
| BP          | GO:0042428  | serotonin metabolic process                                 | 2/115  |
| BP          | GO:0050861  | positive regulation of B cell receptor signaling pathway    | 2/115  |
| BP          | GO:0070472  | regulation of uterine smooth muscle contraction             | 2/115  |
| BP          | GO:0071313  | cellular response to caffeine                               | 2/115  |
| BP          | GO:0072203  | cell proliferation involved in metanephros development      | 2/115  |
| BP          | GO:0071867  | response to monoamine                                       | 3/115  |
| BP          | GO:0071869  | response to catecholamine                                   | 3/115  |
| BP          | GO:0008207  | C21-steroid hormone metabolic process                       | 3/115  |
| BP          | GO:0097756  | negative regulation of blood vessel diameter                | 4/115  |
| BP          | GO:0035296  | regulation of tube diameter                                 | 5/115  |
| BP          | GO:0050880  | regulation of blood vessel size                             | 5/115  |
| BP          | GO:0097746  | regulation of blood vessel diameter                         | 5/115  |
| BP          | GO:0042446  | hormone biosynthetic process                                | 4/115  |
| BP          | GO:0030534  | adult behavior                                              | 5/115  |
| BP          | GO:0035150  | regulation of tube size                                     | 5/115  |
| BP          | GO:0046886  | positive regulation of hormone biosynthetic process         | 2/115  |
| BP          | GO:0070471  | uterine smooth muscle contraction                           | 2/115  |
| BP          | GO:0023061  | signal release                                              | 9/115  |
| BP          | GO:0030168  | platelet activation                                         | 5/115  |
| BP          | GO:0070372  | regulation of ERK1 and ERK2 cascade                         | 7/115  |
| BP          | GO:0010769  | regulation of cell morphogenesis involved in differentiat   | 7/115  |
| BP          | GO:0010770  | positive regulation of cell morphogenesis involved in diffe | 5/115  |
| BP          | GO:0071415  | cellular response to purine-containing compound             | 2/115  |
| BP          | GO:1901160  | primary amino compound metabolic process                    | 2/115  |
| BP          | GO:0090277  | positive regulation of peptide hormone secretion            | 4/115  |
| BP          | GO:0009743  | response to carbohydrate                                    | 6/115  |
| BP          | GO:0006953  | acute-phase response                                        | 3/115  |
| BP          | GO:0022604  | regulation of cell morphogenesis                            | 9/115  |
| BP          | GO:0010752  | regulation of cGMP-mediated signaling                       | 2/115  |
| BP          | GO:0072216  | positive regulation of metanephros development              | 2/115  |
| BP          | GO:1901722  | regulation of cell proliferation involved in kidney develop | 2/115  |
| BP          | GO:0007631  | feeding behavior                                            | 4/115  |
| BP          | GO:0048661  | positive regulation of smooth muscle cell proliferation     | 4/115  |
| BP          | GO:0021549  | cerebellum development                                      | 4/115  |
| BP          | GO:0010975  | regulation of neuron projection development                 | 9/115  |
| BP          | GO:0032352  | positive regulation of hormone metabolic process            | 2/115  |
| BP          | GO:0033604  | negative regulation of catecholamine secretion              | 2/115  |
| BP          | GO:0045073  | regulation of chemokine biosynthetic process                | 2/115  |
| BP          | GO:0046321  | positive regulation of fatty acid oxidation                 | 2/115  |
| BP          | GO:1903358  | regulation of Golgi organization                            | 2/115  |

|    |            |                                                           |       |
|----|------------|-----------------------------------------------------------|-------|
| BP | GO:0060537 | muscle tissue development                                 | 8/115 |
| BP | GO:0007229 | integrin-mediated signaling pathway                       | 4/115 |
| BP | GO:0018958 | phenol-containing compound metabolic process              | 4/115 |
| BP | GO:0045599 | negative regulation of fat cell differentiation           | 3/115 |
| BP | GO:0030195 | negative regulation of blood coagulation                  | 3/115 |
| BP | GO:0071320 | cellular response to cAMP                                 | 3/115 |
| BP | GO:0010566 | regulation of ketone biosynthetic process                 | 2/115 |
| BP | GO:0032354 | response to follicle-stimulating hormone                  | 2/115 |
| BP | GO:0042033 | chemokine biosynthetic process                            | 2/115 |
| BP | GO:0050755 | chemokine metabolic process                               | 2/115 |
| BP | GO:0071871 | response to epinephrine                                   | 2/115 |
| BP | GO:0097237 | cellular response to toxic substance                      | 6/115 |
| BP | GO:1900047 | negative regulation of hemostasis                         | 3/115 |
| BP | GO:0031000 | response to caffeine                                      | 2/115 |
| BP | GO:0036270 | response to diuretic                                      | 2/115 |
| BP | GO:0022037 | metencephalon development                                 | 4/115 |
| BP | GO:0010332 | response to gamma radiation                               | 3/115 |
| BP | GO:0048488 | synaptic vesicle endocytosis                              | 3/115 |
| BP | GO:0140238 | presynaptic endocytosis                                   | 3/115 |
| BP | GO:0022409 | positive regulation of cell-cell adhesion                 | 6/115 |
| BP | GO:1903034 | regulation of response to wounding                        | 5/115 |
| BP | GO:0071496 | cellular response to external stimulus                    | 7/115 |
| BP | GO:0043279 | response to alkaloid                                      | 4/115 |
| BP | GO:0050819 | negative regulation of coagulation                        | 3/115 |
| BP | GO:0090257 | regulation of muscle system process                       | 6/115 |
| BP | GO:0035994 | response to muscle stretch                                | 2/115 |
| BP | GO:0050770 | regulation of axonogenesis                                | 5/115 |
| BP | GO:2000756 | regulation of peptidyl-lysine acetylation                 | 3/115 |
| BP | GO:0010888 | negative regulation of lipid storage                      | 2/115 |
| BP | GO:0032930 | positive regulation of superoxide anion generation        | 2/115 |
| BP | GO:0060004 | reflex                                                    | 2/115 |
| BP | GO:0030098 | lymphocyte differentiation                                | 7/115 |
| BP | GO:0034113 | heterotypic cell-cell adhesion                            | 3/115 |
| BP | GO:0001505 | regulation of neurotransmitter levels                     | 7/115 |
| BP | GO:0050433 | regulation of catecholamine secretion                     | 3/115 |
| BP | GO:0048148 | behavioral response to cocaine                            | 2/115 |
| BP | GO:0050432 | catecholamine secretion                                   | 3/115 |
| BP | GO:0042135 | neurotransmitter catabolic process                        | 2/115 |
| BP | GO:0072111 | cell proliferation involved in kidney development         | 2/115 |
| BP | GO:0010038 | response to metal ion                                     | 7/115 |
| BP | GO:0009749 | response to glucose                                       | 5/115 |
| BP | GO:0050854 | regulation of antigen receptor-mediated signaling pathway | 3/115 |
| BP | GO:0018107 | peptidyl-threonine phosphorylation                        | 4/115 |
| BP | GO:0030198 | extracellular matrix organization                         | 7/115 |
| BP | GO:0035270 | endocrine system development                              | 4/115 |
| BP | GO:0010976 | positive regulation of neuron projection development      | 6/115 |
| BP | GO:0032928 | regulation of superoxide anion generation                 | 2/115 |
| BP | GO:0045666 | positive regulation of neuron differentiation             | 7/115 |
| BP | GO:0009746 | response to hexose                                        | 5/115 |
| BP | GO:0034754 | cellular hormone metabolic process                        | 4/115 |
| BP | GO:0007409 | axonogenesis                                              | 8/115 |
| BP | GO:0019915 | lipid storage                                             | 3/115 |
| BP | GO:0035914 | skeletal muscle cell differentiation                      | 3/115 |
| BP | GO:0030539 | male genitalia development                                | 2/115 |
| BP | GO:0072215 | regulation of metanephros development                     | 2/115 |
| BP | GO:0046887 | positive regulation of hormone secretion                  | 4/115 |
| BP | GO:0036465 | synaptic vesicle recycling                                | 3/115 |
| BP | GO:0050769 | positive regulation of neurogenesis                       | 8/115 |

|    |            |                                                            |       |
|----|------------|------------------------------------------------------------|-------|
| BP | GO:0034284 | response to monosaccharide                                 | 5/115 |
| BP | GO:0071456 | cellular response to hypoxia                               | 5/115 |
| BP | GO:0030900 | forebrain development                                      | 7/115 |
| BP | GO:0018210 | peptidyl-threonine modification                            | 4/115 |
| BP | GO:0014850 | response to muscle activity                                | 2/115 |
| BP | GO:0042430 | indole-containing compound metabolic process               | 2/115 |
| BP | GO:0050857 | positive regulation of antigen receptor-mediated signaling | 2/115 |
| BP | GO:0031346 | positive regulation of cell projection organization        | 7/115 |
| BP | GO:0009612 | response to mechanical stimulus                            | 5/115 |
| BP | GO:0032024 | positive regulation of insulin secretion                   | 3/115 |
| BP | GO:0014829 | vascular smooth muscle contraction                         | 2/115 |
| BP | GO:0031639 | plasminogen activation                                     | 2/115 |
| BP | GO:0043951 | negative regulation of cAMP-mediated signaling             | 2/115 |
| BP | GO:0006801 | superoxide metabolic process                               | 3/115 |
| BP | GO:1901983 | regulation of protein acetylation                          | 3/115 |
| BP | GO:0014706 | striated muscle tissue development                         | 7/115 |
| BP | GO:0070374 | positive regulation of ERK1 and ERK2 cascade               | 5/115 |
| BP | GO:0017157 | regulation of exocytosis                                   | 5/115 |
| BP | GO:0036294 | cellular response to decreased oxygen levels               | 5/115 |
| BP | GO:0006700 | C21-steroid hormone biosynthetic process                   | 2/115 |
| BP | GO:1903203 | regulation of oxidative stress-induced neuron death        | 2/115 |
| BP | GO:0006814 | sodium ion transport                                       | 5/115 |
| BP | GO:0042310 | vasoconstriction                                           | 3/115 |
| BP | GO:0061045 | negative regulation of wound healing                       | 3/115 |
| BP | GO:0035902 | response to immobilization stress                          | 2/115 |
| BP | GO:0036475 | neuron death in response to oxidative stress               | 2/115 |
| BP | GO:0046885 | regulation of hormone biosynthetic process                 | 2/115 |
| BP | GO:0051953 | negative regulation of amine transport                     | 2/115 |
| BP | GO:0051937 | catecholamine transport                                    | 3/115 |
| BP | GO:0045444 | fat cell differentiation                                   | 5/115 |
| BP | GO:0022407 | regulation of cell-cell adhesion                           | 7/115 |
| BP | GO:0046879 | hormone secretion                                          | 6/115 |
| BP | GO:0008209 | androgen metabolic process                                 | 2/115 |
| BP | GO:0034698 | response to gonadotropin                                   | 2/115 |
| BP | GO:0042730 | fibrinolysis                                               | 2/115 |
| BP | GO:0045577 | regulation of B cell differentiation                       | 2/115 |
| BP | GO:0030193 | regulation of blood coagulation                            | 3/115 |
| BP | GO:0071260 | cellular response to mechanical stimulus                   | 3/115 |
| BP | GO:1901214 | regulation of neuron death                                 | 6/115 |
| BP | GO:1900046 | regulation of hemostasis                                   | 3/115 |
| BP | GO:0035107 | appendage morphogenesis                                    | 4/115 |
| BP | GO:0035108 | limb morphogenesis                                         | 4/115 |
| BP | GO:0051592 | response to calcium ion                                    | 4/115 |
| BP | GO:0061041 | regulation of wound healing                                | 4/115 |
| BP | GO:0050773 | regulation of dendrite development                         | 4/115 |
| BP | GO:0050855 | regulation of B cell receptor signaling pathway            | 2/115 |
| BP | GO:1900181 | negative regulation of protein localization to nucleus     | 2/115 |
| BP | GO:0021766 | hippocampus development                                    | 3/115 |
| BP | GO:0048708 | astrocyte differentiation                                  | 3/115 |
| BP | GO:1904018 | positive regulation of vasculature development             | 5/115 |
| BP | GO:0000302 | response to reactive oxygen species                        | 5/115 |
| BP | GO:0042445 | hormone metabolic process                                  | 5/115 |
| BP | GO:0030902 | hindbrain development                                      | 4/115 |
| BP | GO:0046320 | regulation of fatty acid oxidation                         | 2/115 |
| BP | GO:0048145 | regulation of fibroblast proliferation                     | 3/115 |
| BP | GO:0071277 | cellular response to calcium ion                           | 3/115 |
| BP | GO:0016358 | dendrite development                                       | 5/115 |
| BP | GO:0009914 | hormone transport                                          | 6/115 |

|    |            |                                                            |       |
|----|------------|------------------------------------------------------------|-------|
| BP | GO:0042133 | neurotransmitter metabolic process                         | 4/115 |
| BP | GO:0071453 | cellular response to oxygen levels                         | 5/115 |
| BP | GO:0014910 | regulation of smooth muscle cell migration                 | 3/115 |
| BP | GO:0048144 | fibroblast proliferation                                   | 3/115 |
| BP | GO:0050818 | regulation of coagulation                                  | 3/115 |
| BP | GO:0060560 | developmental growth involved in morphogenesis             | 5/115 |
| BP | GO:0030431 | sleep                                                      | 2/115 |
| BP | GO:0050772 | positive regulation of axonogenesis                        | 3/115 |
| BP | GO:0043062 | extracellular structure organization                       | 7/115 |
| BP | GO:0046677 | response to antibiotic                                     | 6/115 |
| BP | GO:0033002 | muscle cell proliferation                                  | 5/115 |
| BP | GO:0001655 | urogenital system development                              | 6/115 |
| BP | GO:0051235 | maintenance of location                                    | 6/115 |
| BP | GO:0045987 | positive regulation of smooth muscle contraction           | 2/115 |
| BP | GO:0070570 | regulation of neuron projection regeneration               | 2/115 |
| BP | GO:0071214 | cellular response to abiotic stimulus                      | 6/115 |
| BP | GO:0104004 | cellular response to environmental stimulus                | 6/115 |
| BP | GO:1904035 | regulation of epithelial cell apoptotic process            | 3/115 |
| BP | GO:0007519 | skeletal muscle tissue development                         | 4/115 |
| BP | GO:1903305 | regulation of regulated secretory pathway                  | 4/115 |
| BP | GO:0030336 | negative regulation of cell migration                      | 6/115 |
| BP | GO:0051090 | regulation of DNA-binding transcription factor activity    | 7/115 |
| BP | GO:0019934 | cGMP-mediated signaling                                    | 2/115 |
| BP | GO:0061036 | positive regulation of cartilage development               | 2/115 |
| BP | GO:2000758 | positive regulation of peptidyl-lysine acetylation         | 2/115 |
| BP | GO:2001024 | negative regulation of response to drug                    | 2/115 |
| BP | GO:0015844 | monoamine transport                                        | 3/115 |
| BP | GO:1903035 | negative regulation of response to wounding                | 3/115 |
| BP | GO:0071868 | cellular response to monoamine stimulus                    | 2/115 |
| BP | GO:0071870 | cellular response to catecholamine stimulus                | 2/115 |
| BP | GO:0097009 | energy homeostasis                                         | 2/115 |
| BP | GO:0014909 | smooth muscle cell migration                               | 3/115 |
| BP | GO:0071560 | cellular response to transforming growth factor beta stimu | 5/115 |
| BP | GO:1904062 | regulation of cation transmembrane transport               | 6/115 |
| BP | GO:0030072 | peptide hormone secretion                                  | 5/115 |
| BP | GO:0071312 | cellular response to alkaloid                              | 2/115 |
| BP | GO:0021537 | telencephalon development                                  | 5/115 |
| BP | GO:1990138 | neuron projection extension                                | 4/115 |
| BP | GO:1901216 | positive regulation of neuron death                        | 3/115 |
| BP | GO:0048660 | regulation of smooth muscle cell proliferation             | 4/115 |
| BP | GO:0060538 | skeletal muscle organ development                          | 4/115 |
| BP | GO:0046627 | negative regulation of insulin receptor signaling pathway  | 2/115 |
| BP | GO:0060428 | lung epithelium development                                | 2/115 |
| BP | GO:0071392 | cellular response to estradiol stimulus                    | 2/115 |
| BP | GO:0090322 | regulation of superoxide metabolic process                 | 2/115 |
| BP | GO:0070997 | neuron death                                               | 6/115 |
| BP | GO:0071559 | response to transforming growth factor beta                | 5/115 |
| BP | GO:0051952 | regulation of amine transport                              | 3/115 |
| BP | GO:2000146 | negative regulation of cell motility                       | 6/115 |
| BP | GO:0006937 | regulation of muscle contraction                           | 4/115 |
| BP | GO:0048659 | smooth muscle cell proliferation                           | 4/115 |
| BP | GO:0097327 | response to antineoplastic agent                           | 3/115 |
| BP | GO:0006979 | response to oxidative stress                               | 7/115 |
| BP | GO:0014912 | negative regulation of smooth muscle cell migration        | 2/115 |
| BP | GO:0045923 | positive regulation of fatty acid metabolic process        | 2/115 |
| BP | GO:0021543 | pallium development                                        | 4/115 |
| BP | GO:0010771 | negative regulation of cell morphogenesis involved in diff | 3/115 |
| BP | GO:0016572 | histone phosphorylation                                    | 2/115 |

|    |            |                                                              |       |
|----|------------|--------------------------------------------------------------|-------|
| BP | GO:0032350 | regulation of hormone metabolic process                      | 2/115 |
| BP | GO:1900077 | negative regulation of cellular response to insulin stimulus | 2/115 |
| BP | GO:1904037 | positive regulation of epithelial cell apoptotic process     | 2/115 |
| BP | GO:0001666 | response to hypoxia                                          | 6/115 |
| BP | GO:0060840 | artery development                                           | 3/115 |
| BP | GO:2001023 | regulation of response to drug                               | 3/115 |
| BP | GO:0033574 | response to testosterone                                     | 2/115 |
| BP | GO:0050821 | protein stabilization                                        | 4/115 |
| BP | GO:0046883 | regulation of hormone secretion                              | 5/115 |
| BP | GO:0048736 | appendage development                                        | 4/115 |
| BP | GO:0060173 | limb development                                             | 4/115 |
| BP | GO:0015837 | amine transport                                              | 3/115 |
| BP | GO:0031668 | cellular response to extracellular stimulus                  | 5/115 |
| BP | GO:0050714 | positive regulation of protein secretion                     | 5/115 |
| BP | GO:0014046 | dopamine secretion                                           | 2/115 |
| BP | GO:0014059 | regulation of dopamine secretion                             | 2/115 |
| BP | GO:0071526 | semaphorin-plexin signaling pathway                          | 2/115 |
| BP | GO:0090184 | positive regulation of kidney development                    | 2/115 |
| BP | GO:0008217 | regulation of blood pressure                                 | 4/115 |
| BP | GO:0014812 | muscle cell migration                                        | 3/115 |
| BP | GO:0032868 | response to insulin                                          | 5/115 |
| BP | GO:0036293 | response to decreased oxygen levels                          | 6/115 |
| BP | GO:0042181 | ketone biosynthetic process                                  | 2/115 |
| BP | GO:1903706 | regulation of hemopoiesis                                    | 7/115 |
| BP | GO:0034198 | cellular response to amino acid starvation                   | 2/115 |
| BP | GO:1901985 | positive regulation of protein acetylation                   | 2/115 |
| BP | GO:0015696 | ammonium transport                                           | 3/115 |
| BP | GO:0015711 | organic anion transport                                      | 7/115 |
| BP | GO:0021761 | limbic system development                                    | 3/115 |
| BP | GO:0034765 | regulation of ion transmembrane transport                    | 7/115 |
| BP | GO:0071248 | cellular response to metal ion                               | 4/115 |
| BP | GO:0032965 | regulation of collagen biosynthetic process                  | 2/115 |
| BP | GO:0044331 | cell-cell adhesion mediated by cadherin                      | 2/115 |
| BP | GO:0016049 | cell growth                                                  | 7/115 |
| BP | GO:0042594 | response to starvation                                       | 4/115 |
| BP | GO:0006939 | smooth muscle contraction                                    | 3/115 |
| BP | GO:0006631 | fatty acid metabolic process                                 | 6/115 |
| BP | GO:1904019 | epithelial cell apoptotic process                            | 3/115 |
| BP | GO:0031018 | endocrine pancreas development                               | 2/115 |
| BP | GO:0051271 | negative regulation of cellular component movement           | 6/115 |
| BP | GO:0017158 | regulation of calcium ion-dependent exocytosis               | 3/115 |
| BP | GO:0099504 | synaptic vesicle cycle                                       | 4/115 |
| BP | GO:0010883 | regulation of lipid storage                                  | 2/115 |
| BP | GO:0048512 | circadian behavior                                           | 2/115 |
| BP | GO:0071354 | cellular response to interleukin-6                           | 2/115 |
| BP | GO:1990928 | response to amino acid starvation                            | 2/115 |
| BP | GO:0002793 | positive regulation of peptide secretion                     | 5/115 |
| BP | GO:0007622 | rhythmic behavior                                            | 2/115 |
| BP | GO:0014911 | positive regulation of smooth muscle cell migration          | 2/115 |
| BP | GO:0048806 | genitalia development                                        | 2/115 |
| BP | GO:0032963 | collagen metabolic process                                   | 3/115 |
| BP | GO:0070482 | response to oxygen levels                                    | 6/115 |
| BP | GO:0045933 | positive regulation of muscle contraction                    | 2/115 |
| BP | GO:0040013 | negative regulation of locomotion                            | 6/115 |
| BP | GO:0010712 | regulation of collagen metabolic process                     | 2/115 |
| BP | GO:0060042 | retina morphogenesis in camera-type eye                      | 2/115 |
| BP | GO:1903532 | positive regulation of secretion by cell                     | 6/115 |
| BP | GO:0016079 | synaptic vesicle exocytosis                                  | 3/115 |

|    |            |                                                            |       |
|----|------------|------------------------------------------------------------|-------|
| BP | GO:0045766 | positive regulation of angiogenesis                        | 4/115 |
| BP | GO:0002931 | response to ischemia                                       | 2/115 |
| BP | GO:0009409 | response to cold                                           | 2/115 |
| BP | GO:0014009 | glial cell proliferation                                   | 2/115 |
| BP | GO:0070741 | response to interleukin-6                                  | 2/115 |
| BP | GO:0097164 | ammonium ion metabolic process                             | 4/115 |
| BP | GO:0045785 | positive regulation of cell adhesion                       | 6/115 |
| BP | GO:0010811 | positive regulation of cell-substrate adhesion             | 3/115 |
| BP | GO:0043618 | regulation of transcription from RNA polymerase II promc   | 3/115 |
| BP | GO:0048675 | axon extension                                             | 3/115 |
| BP | GO:0034599 | cellular response to oxidative stress                      | 5/115 |
| BP | GO:0099003 | vesicle-mediated transport in synapse                      | 4/115 |
| BP | GO:0019369 | arachidonic acid metabolic process                         | 2/115 |
| BP | GO:0043949 | regulation of cAMP-mediated signaling                      | 2/115 |
| BP | GO:0090276 | regulation of peptide hormone secretion                    | 4/115 |
| BP | GO:0015872 | dopamine transport                                         | 2/115 |
| BP | GO:0043523 | regulation of neuron apoptotic process                     | 4/115 |
| BP | GO:0046717 | acid secretion                                             | 3/115 |
| BP | GO:0007517 | muscle organ development                                   | 6/115 |
| BP | GO:0030326 | embryonic limb morphogenesis                               | 3/115 |
| BP | GO:0035113 | embryonic appendage morphogenesis                          | 3/115 |
| BP | GO:0007131 | reciprocal meiotic recombination                           | 2/115 |
| BP | GO:0031638 | zymogen activation                                         | 2/115 |
| BP | GO:0032964 | collagen biosynthetic process                              | 2/115 |
| BP | GO:0035065 | regulation of histone acetylation                          | 2/115 |
| BP | GO:0042113 | B cell activation                                          | 5/115 |
| BP | GO:0015893 | drug transport                                             | 4/115 |
| BP | GO:0002720 | positive regulation of cytokine production involved in imr | 2/115 |
| BP | GO:0006584 | catecholamine metabolic process                            | 2/115 |
| BP | GO:0009712 | catechol-containing compound metabolic process             | 2/115 |
| BP | GO:0030199 | collagen fibril organization                               | 2/115 |
| BP | GO:0035825 | homologous recombination                                   | 2/115 |
| BP | GO:0043620 | regulation of DNA-templated transcription in response to   | 3/115 |
| BP | GO:0001558 | regulation of cell growth                                  | 6/115 |
| BP | GO:0042220 | response to cocaine                                        | 2/115 |
| BP | GO:0071241 | cellular response to inorganic substance                   | 4/115 |
| BP | GO:0070588 | calcium ion transmembrane transport                        | 5/115 |
| BP | GO:0010001 | glial cell differentiation                                 | 4/115 |
| BP | GO:1901342 | regulation of vasculature development                      | 6/115 |
| BP | GO:0090183 | regulation of kidney development                           | 2/115 |
| BP | GO:0030183 | B cell differentiation                                     | 3/115 |
| BP | GO:0045598 | regulation of fat cell differentiation                     | 3/115 |
| BP | GO:0072329 | monocarboxylic acid catabolic process                      | 3/115 |
| BP | GO:0007568 | aging                                                      | 5/115 |
| BP | GO:0051047 | positive regulation of secretion                           | 6/115 |
| BP | GO:0001933 | negative regulation of protein phosphorylation             | 6/115 |
| BP | GO:0051052 | regulation of DNA metabolic process                        | 6/115 |
| BP | GO:0019229 | regulation of vasoconstriction                             | 2/115 |
| BP | GO:0032722 | positive regulation of chemokine production                | 2/115 |
| BP | GO:0035904 | aorta development                                          | 2/115 |
| BP | GO:1902041 | regulation of extrinsic apoptotic signaling pathway via de | 2/115 |
| CC | GO:0070821 | tertiary granule membrane                                  | 3/121 |
| CC | GO:0031252 | cell leading edge                                          | 7/121 |
| CC | GO:0150034 | distal axon                                                | 5/121 |
| CC | GO:0009897 | external side of plasma membrane                           | 6/121 |
| CC | GO:0030667 | secretory granule membrane                                 | 5/121 |
| CC | GO:0043679 | axon terminus                                              | 3/121 |
| MF | GO:0005452 | inorganic anion exchanger activity                         | 2/115 |



|    |            |                                                              |       |
|----|------------|--------------------------------------------------------------|-------|
| MF | GO:0030553 | cGMP binding                                                 | 2/115 |
| MF | GO:0015291 | secondary active transmembrane transporter activity          | 6/115 |
| MF | GO:0070402 | NADPH binding                                                | 2/115 |
| MF | GO:0001227 | DNA-binding transcription repressor activity, RNA polymerase | 6/115 |
| MF | GO:0035173 | histone kinase activity                                      | 2/115 |
| MF | GO:0047555 | 3',5'-cyclic-GMP phosphodiesterase activity                  | 2/115 |
| MF | GO:0001228 | DNA-binding transcription activator activity, RNA polymerase | 8/115 |
| MF | GO:0019865 | immunoglobulin binding                                       | 2/115 |
| MF | GO:0050662 | coenzyme binding                                             | 6/115 |
| MF | GO:0008514 | organic anion transmembrane transporter activity             | 5/115 |
| MF | GO:0004114 | 3',5'-cyclic-nucleotide phosphodiesterase activity           | 2/115 |
| MF | GO:0015293 | symporter activity                                           | 4/115 |
| MF | GO:0004112 | cyclic-nucleotide phosphodiesterase activity                 | 2/115 |
| MF | GO:0035035 | histone acetyltransferase binding                            | 2/115 |
| MF | GO:0043178 | alcohol binding                                              | 3/115 |
| MF | GO:0031624 | ubiquitin conjugating enzyme binding                         | 2/115 |
| MF | GO:0035258 | steroid hormone receptor binding                             | 3/115 |
| MF | GO:0030551 | cyclic nucleotide binding                                    | 2/115 |
| MF | GO:0044390 | ubiquitin-like protein conjugating enzyme binding            | 2/115 |
| MF | GO:0046873 | metal ion transmembrane transporter activity                 | 7/115 |
| MF | GO:0022804 | active transmembrane transporter activity                    | 6/115 |
| MF | GO:0004712 | protein serine/threonine/tyrosine kinase activity            | 2/115 |
| MF | GO:0050681 | androgen receptor binding                                    | 2/115 |
| MF | GO:0042805 | actinin binding                                              | 2/115 |
| MF | GO:0005246 | calcium channel regulator activity                           | 2/115 |
| MF | GO:1990841 | promoter-specific chromatin binding                          | 2/115 |
| MF | GO:0099106 | ion channel regulator activity                               | 3/115 |
| MF | GO:0051018 | protein kinase A binding                                     | 2/115 |
| MF | GO:0019001 | guanyl nucleotide binding                                    | 6/115 |
| MF | GO:0032561 | guanyl ribonucleotide binding                                | 6/115 |
| MF | GO:0008146 | sulfotransferase activity                                    | 2/115 |
| MF | GO:0015459 | potassium channel regulator activity                         | 2/115 |
| MF | GO:0050661 | NADP binding                                                 | 2/115 |
| MF | GO:0019207 | kinase regulator activity                                    | 4/115 |
| MF | GO:0001047 | core promoter binding                                        | 2/115 |



|           |             |            |             |
|-----------|-------------|------------|-------------|
| 408/18670 | 0.003763876 | 0.15558628 | 0.141315591 |
| 103/18670 | 0.003781096 | 0.15558628 | 0.141315591 |
| 103/18670 | 0.003781096 | 0.15558628 | 0.141315591 |
| 51/18670  | 0.003823581 | 0.15558628 | 0.141315591 |
| 53/18670  | 0.004263015 | 0.15558628 | 0.141315591 |
| 53/18670  | 0.004263015 | 0.15558628 | 0.141315591 |
| 16/18670  | 0.004265874 | 0.15558628 | 0.141315591 |
| 16/18670  | 0.004265874 | 0.15558628 | 0.141315591 |
| 16/18670  | 0.004265874 | 0.15558628 | 0.141315591 |
| 16/18670  | 0.004265874 | 0.15558628 | 0.141315591 |
| 16/18670  | 0.004265874 | 0.15558628 | 0.141315591 |
| 247/18670 | 0.004279881 | 0.15558628 | 0.141315591 |
| 54/18670  | 0.004493741 | 0.15933958 | 0.144724634 |
| 17/18670  | 0.004815276 | 0.15933958 | 0.144724634 |
| 17/18670  | 0.004815276 | 0.15933958 | 0.144724634 |
| 111/18670 | 0.004933348 | 0.15933958 | 0.144724634 |
| 56/18670  | 0.004977557 | 0.15933958 | 0.144724634 |
| 56/18670  | 0.004977557 | 0.15933958 | 0.144724634 |
| 56/18670  | 0.004977557 | 0.15933958 | 0.144724634 |
| 255/18670 | 0.004991269 | 0.15933958 | 0.144724634 |
| 179/18670 | 0.005031621 | 0.15933958 | 0.144724634 |
| 339/18670 | 0.005032442 | 0.15933958 | 0.144724634 |
| 112/18670 | 0.005092163 | 0.15933958 | 0.144724634 |
| 57/18670  | 0.005230781 | 0.16163113 | 0.146805999 |
| 259/18670 | 0.005377912 | 0.16265394 | 0.147734993 |
| 18/18670  | 0.005395479 | 0.16265394 | 0.147734993 |
| 183/18670 | 0.005518888 | 0.16436977 | 0.149293446 |
| 59/18670  | 0.005760177 | 0.16951379 | 0.153965638 |
| 19/18670  | 0.006006089 | 0.17065578 | 0.155002885 |
| 19/18670  | 0.006006089 | 0.17065578 | 0.155002885 |
| 19/18670  | 0.006006089 | 0.17065578 | 0.155002885 |
| 353/18670 | 0.006245138 | 0.1741228  | 0.158151908 |
| 61/18670  | 0.00632057  | 0.1741228  | 0.158151908 |
| 354/18670 | 0.006339422 | 0.1741228  | 0.158151908 |
| 62/18670  | 0.006612533 | 0.17859442 | 0.162213375 |
| 20/18670  | 0.006646718 | 0.17859442 | 0.162213375 |
| 64/18670  | 0.00722026  | 0.18905022 | 0.171710151 |
| 21/18670  | 0.007316978 | 0.18905022 | 0.171710151 |
| 21/18670  | 0.007316978 | 0.18905022 | 0.171710151 |
| 364/18670 | 0.007341756 | 0.18905022 | 0.171710151 |
| 197/18670 | 0.007487297 | 0.19009489 | 0.172659002 |
| 65/18670  | 0.007536124 | 0.19009489 | 0.172659002 |
| 126/18670 | 0.007686306 | 0.1916475  | 0.174069203 |
| 368/18670 | 0.007773986 | 0.1916475  | 0.174069203 |
| 127/18670 | 0.007899294 | 0.1916475  | 0.174069203 |
| 281/18670 | 0.007907785 | 0.1916475  | 0.174069203 |
| 22/18670  | 0.008016486 | 0.19239567 | 0.174748748 |
| 371/18670 | 0.008110325 | 0.19277618 | 0.175094359 |
| 202/18670 | 0.008295605 | 0.19350305 | 0.175754562 |
| 129/18670 | 0.008336841 | 0.19350305 | 0.175754562 |
| 468/18670 | 0.008411866 | 0.19350305 | 0.175754562 |
| 68/18670  | 0.008532295 | 0.19350305 | 0.175754562 |
| 68/18670  | 0.008532295 | 0.19350305 | 0.175754562 |
| 23/18670  | 0.008744864 | 0.1937897  | 0.176014917 |
| 23/18670  | 0.008744864 | 0.1937897  | 0.176014917 |
| 131/18670 | 0.008789995 | 0.1937897  | 0.176014917 |
| 69/18670  | 0.008880692 | 0.1937897  | 0.176014917 |
| 474/18670 | 0.009044375 | 0.1937897  | 0.176014917 |

|           |             |            |             |
|-----------|-------------|------------|-------------|
| 207/18670 | 0.009162634 | 0.1937897  | 0.176014917 |
| 207/18670 | 0.009162634 | 0.1937897  | 0.176014917 |
| 381/18670 | 0.009309414 | 0.1937897  | 0.176014917 |
| 134/18670 | 0.009499463 | 0.1937897  | 0.176014917 |
| 24/18670  | 0.009501735 | 0.1937897  | 0.176014917 |
| 24/18670  | 0.009501735 | 0.1937897  | 0.176014917 |
| 24/18670  | 0.009501735 | 0.1937897  | 0.176014917 |
| 383/18670 | 0.009564055 | 0.1937897  | 0.176014917 |
| 210/18670 | 0.009711869 | 0.19518487 | 0.17728212  |
| 72/18670  | 0.009975474 | 0.19847012 | 0.180266038 |
| 25/18670  | 0.010286728 | 0.19847012 | 0.180266038 |
| 25/18670  | 0.010286728 | 0.19847012 | 0.180266038 |
| 25/18670  | 0.010286728 | 0.19847012 | 0.180266038 |
| 73/18670  | 0.010357057 | 0.19847012 | 0.180266038 |
| 73/18670  | 0.010357057 | 0.19847012 | 0.180266038 |
| 390/18670 | 0.010495636 | 0.19957856 | 0.181272809 |
| 215/18670 | 0.010676974 | 0.20147695 | 0.182997079 |
| 217/18670 | 0.011080774 | 0.20324368 | 0.184601755 |
| 217/18670 | 0.011080774 | 0.20324368 | 0.184601755 |
| 26/18670  | 0.011099473 | 0.20324368 | 0.184601755 |
| 26/18670  | 0.011099473 | 0.20324368 | 0.184601755 |
| 218/18670 | 0.011286538 | 0.20514943 | 0.186332709 |
| 76/18670  | 0.011552251 | 0.20687989 | 0.187904448 |
| 76/18670  | 0.011552251 | 0.20687989 | 0.187904448 |
| 27/18670  | 0.011939604 | 0.20687989 | 0.187904448 |
| 27/18670  | 0.011939604 | 0.20687989 | 0.187904448 |
| 27/18670  | 0.011939604 | 0.20687989 | 0.187904448 |
| 27/18670  | 0.011939604 | 0.20687989 | 0.187904448 |
| 77/18670  | 0.011967566 | 0.20687989 | 0.187904448 |
| 223/18670 | 0.012354601 | 0.20798393 | 0.188907226 |
| 403/18670 | 0.01239893  | 0.20798393 | 0.188907226 |
| 312/18670 | 0.012794715 | 0.20798393 | 0.188907226 |
| 28/18670  | 0.01280676  | 0.20798393 | 0.188907226 |
| 28/18670  | 0.01280676  | 0.20798393 | 0.188907226 |
| 28/18670  | 0.01280676  | 0.20798393 | 0.188907226 |
| 28/18670  | 0.01280676  | 0.20798393 | 0.188907226 |
| 79/18670  | 0.012823744 | 0.20798393 | 0.188907226 |
| 79/18670  | 0.012823744 | 0.20798393 | 0.188907226 |
| 313/18670 | 0.012981041 | 0.20798393 | 0.188907226 |
| 80/18670  | 0.013264657 | 0.20798393 | 0.188907226 |
| 148/18670 | 0.013301019 | 0.20798393 | 0.188907226 |
| 148/18670 | 0.013301019 | 0.20798393 | 0.188907226 |
| 148/18670 | 0.013301019 | 0.20798393 | 0.188907226 |
| 148/18670 | 0.013301019 | 0.20798393 | 0.188907226 |
| 149/18670 | 0.01360454  | 0.20798393 | 0.188907226 |
| 29/18670  | 0.013700582 | 0.20798393 | 0.188907226 |
| 29/18670  | 0.013700582 | 0.20798393 | 0.188907226 |
| 81/18670  | 0.013714151 | 0.20798393 | 0.188907226 |
| 81/18670  | 0.013714151 | 0.20798393 | 0.188907226 |
| 230/18670 | 0.01396237  | 0.21045718 | 0.191153622 |
| 232/18670 | 0.014446421 | 0.21100153 | 0.191648039 |
| 232/18670 | 0.014446421 | 0.21100153 | 0.191648039 |
| 152/18670 | 0.014541463 | 0.21100153 | 0.191648039 |
| 30/18670  | 0.014620715 | 0.21100153 | 0.191648039 |
| 83/18670  | 0.014638968 | 0.21100153 | 0.191648039 |
| 83/18670  | 0.014638968 | 0.21100153 | 0.191648039 |
| 233/18670 | 0.014692629 | 0.21100153 | 0.191648039 |
| 322/18670 | 0.014744628 | 0.21100153 | 0.191648039 |

|           |             |            |             |
|-----------|-------------|------------|-------------|
| 153/18670 | 0.014862625 | 0.21100153 | 0.191648039 |
| 234/18670 | 0.014941643 | 0.21100153 | 0.191648039 |
| 84/18670  | 0.01511433  | 0.21100153 | 0.191648039 |
| 84/18670  | 0.01511433  | 0.21100153 | 0.191648039 |
| 84/18670  | 0.01511433  | 0.21100153 | 0.191648039 |
| 235/18670 | 0.015193476 | 0.21100153 | 0.191648039 |
| 31/18670  | 0.015566806 | 0.21323632 | 0.193677857 |
| 85/18670  | 0.015598351 | 0.21323632 | 0.193677857 |
| 422/18670 | 0.015613177 | 0.21323632 | 0.193677857 |
| 327/18670 | 0.015793419 | 0.21451281 | 0.194837257 |
| 239/18670 | 0.016229257 | 0.21801898 | 0.19802184  |
| 330/18670 | 0.016446975 | 0.21801898 | 0.19802184  |
| 330/18670 | 0.016446975 | 0.21801898 | 0.19802184  |
| 32/18670  | 0.016538506 | 0.21801898 | 0.19802184  |
| 32/18670  | 0.016538506 | 0.21801898 | 0.19802184  |
| 331/18670 | 0.016668927 | 0.21801898 | 0.19802184  |
| 331/18670 | 0.016668927 | 0.21801898 | 0.19802184  |
| 88/18670  | 0.017102531 | 0.21892769 | 0.198847196 |
| 160/18670 | 0.017236662 | 0.21892769 | 0.198847196 |
| 160/18670 | 0.017236662 | 0.21892769 | 0.198847196 |
| 334/18670 | 0.017347207 | 0.21892769 | 0.198847196 |
| 432/18670 | 0.017524893 | 0.21892769 | 0.198847196 |
| 33/18670  | 0.01753547  | 0.21892769 | 0.198847196 |
| 33/18670  | 0.01753547  | 0.21892769 | 0.198847196 |
| 33/18670  | 0.01753547  | 0.21892769 | 0.198847196 |
| 33/18670  | 0.01753547  | 0.21892769 | 0.198847196 |
| 90/18670  | 0.018148878 | 0.22432013 | 0.203745038 |
| 90/18670  | 0.018148878 | 0.22432013 | 0.203745038 |
| 34/18670  | 0.018557355 | 0.22597923 | 0.205251954 |
| 34/18670  | 0.018557355 | 0.22597923 | 0.205251954 |
| 34/18670  | 0.018557355 | 0.22597923 | 0.205251954 |
| 91/18670  | 0.018685153 | 0.22642009 | 0.205652377 |
| 249/18670 | 0.019022201 | 0.22937991 | 0.208340717 |
| 342/18670 | 0.019248562 | 0.23069388 | 0.209534171 |
| 250/18670 | 0.019317813 | 0.23069388 | 0.209534171 |
| 35/18670  | 0.019603823 | 0.23201834 | 0.210737148 |
| 251/18670 | 0.019616437 | 0.23201834 | 0.210737148 |
| 168/18670 | 0.020225174 | 0.2350397  | 0.213481386 |
| 94/18670  | 0.020346478 | 0.2350397  | 0.213481386 |
| 169/18670 | 0.020619767 | 0.2350397  | 0.213481386 |
| 169/18670 | 0.020619767 | 0.2350397  | 0.213481386 |
| 36/18670  | 0.020674537 | 0.2350397  | 0.213481386 |
| 36/18670  | 0.020674537 | 0.2350397  | 0.213481386 |
| 36/18670  | 0.020674537 | 0.2350397  | 0.213481386 |
| 36/18670  | 0.020674537 | 0.2350397  | 0.213481386 |
| 348/18670 | 0.020764957 | 0.2350397  | 0.213481386 |
| 255/18670 | 0.020841281 | 0.2350397  | 0.213481386 |
| 95/18670  | 0.020917773 | 0.2350397  | 0.213481386 |
| 349/18670 | 0.021025362 | 0.23517962 | 0.213608466 |
| 171/18670 | 0.021423131 | 0.23670405 | 0.214993073 |
| 171/18670 | 0.021423131 | 0.23670405 | 0.214993073 |
| 96/18670  | 0.021497835 | 0.23670405 | 0.214993073 |
| 451/18670 | 0.021603568 | 0.23670405 | 0.214993073 |
| 37/18670  | 0.021769164 | 0.23670405 | 0.214993073 |
| 37/18670  | 0.021769164 | 0.23670405 | 0.214993073 |
| 172/18670 | 0.021831927 | 0.23670405 | 0.214993073 |
| 97/18670  | 0.022086667 | 0.23842027 | 0.216551881 |
| 38/18670  | 0.022887375 | 0.24282228 | 0.220550129 |

|           |             |            |             |
|-----------|-------------|------------|-------------|
| 38/18670  | 0.022887375 | 0.24282228 | 0.220550129 |
| 38/18670  | 0.022887375 | 0.24282228 | 0.220550129 |
| 38/18670  | 0.022887375 | 0.24282228 | 0.220550129 |
| 359/18670 | 0.023752394 | 0.25040301 | 0.227435537 |
| 100/18670 | 0.023905789 | 0.25040301 | 0.227435537 |
| 100/18670 | 0.023905789 | 0.25040301 | 0.227435537 |
| 39/18670  | 0.024028843 | 0.25062995 | 0.227641668 |
| 178/18670 | 0.024385088 | 0.25111975 | 0.228086539 |
| 266/18670 | 0.024464545 | 0.25111975 | 0.228086539 |
| 179/18670 | 0.024827452 | 0.25111975 | 0.228086539 |
| 179/18670 | 0.024827452 | 0.25111975 | 0.228086539 |
| 102/18670 | 0.025162379 | 0.25111975 | 0.228086539 |
| 268/18670 | 0.025164219 | 0.25111975 | 0.228086539 |
| 268/18670 | 0.025164219 | 0.25111975 | 0.228086539 |
| 40/18670  | 0.025193244 | 0.25111975 | 0.228086539 |
| 40/18670  | 0.025193244 | 0.25111975 | 0.228086539 |
| 40/18670  | 0.025193244 | 0.25111975 | 0.228086539 |
| 40/18670  | 0.025193244 | 0.25111975 | 0.228086539 |
| 182/18670 | 0.026183624 | 0.25994345 | 0.236100912 |
| 104/18670 | 0.026454011 | 0.26157726 | 0.237584869 |
| 272/18670 | 0.02660194  | 0.26199201 | 0.237961573 |
| 370/18670 | 0.027016578 | 0.26501977 | 0.240711617 |
| 42/18670  | 0.027589566 | 0.26906105 | 0.244382226 |
| 475/18670 | 0.027646241 | 0.26906105 | 0.244382226 |
| 43/18670  | 0.028820855 | 0.27830138 | 0.252775015 |
| 43/18670  | 0.028820855 | 0.27830138 | 0.252775015 |
| 108/18670 | 0.029142209 | 0.2803095  | 0.254598943 |
| 482/18670 | 0.029605975 | 0.28262047 | 0.256697949 |
| 109/18670 | 0.02983607  | 0.28262047 | 0.256697949 |
| 483/18670 | 0.029893428 | 0.28262047 | 0.256697949 |
| 190/18670 | 0.030014911 | 0.28262047 | 0.256697949 |
| 44/18670  | 0.030073813 | 0.28262047 | 0.256697949 |
| 44/18670  | 0.030073813 | 0.28262047 | 0.256697949 |
| 484/18670 | 0.030182769 | 0.28262047 | 0.256697949 |
| 191/18670 | 0.030515936 | 0.28380266 | 0.257771709 |
| 110/18670 | 0.030538636 | 0.28380266 | 0.257771709 |
| 383/18670 | 0.031243391 | 0.28807651 | 0.261653552 |
| 111/18670 | 0.031249894 | 0.28807651 | 0.261653552 |
| 45/18670  | 0.031348132 | 0.28807651 | 0.261653552 |
| 384/18670 | 0.031585456 | 0.2891824  | 0.262658006 |
| 112/18670 | 0.031969832 | 0.29126578 | 0.264550294 |
| 194/18670 | 0.032048662 | 0.29126578 | 0.264550294 |
| 46/18670  | 0.032643505 | 0.29237226 | 0.265555287 |
| 46/18670  | 0.032643505 | 0.29237226 | 0.265555287 |
| 46/18670  | 0.032643505 | 0.29237226 | 0.265555287 |
| 46/18670  | 0.032643505 | 0.29237226 | 0.265555287 |
| 288/18670 | 0.03287393  | 0.29337312 | 0.266464345 |
| 47/18670  | 0.03395963  | 0.29981502 | 0.27231538  |
| 47/18670  | 0.03395963  | 0.29981502 | 0.27231538  |
| 47/18670  | 0.03395963  | 0.29981502 | 0.27231538  |
| 115/18670 | 0.03418158  | 0.30070059 | 0.273119727 |
| 394/18670 | 0.03514157  | 0.30804951 | 0.279794587 |
| 48/18670  | 0.035296207 | 0.30831175 | 0.280032768 |
| 396/18670 | 0.035882617 | 0.31233039 | 0.283682811 |
| 49/18670  | 0.036652939 | 0.31680442 | 0.287746479 |
| 49/18670  | 0.036652939 | 0.31680442 | 0.287746479 |
| 399/18670 | 0.037013011 | 0.31880196 | 0.289560799 |
| 119/18670 | 0.037251164 | 0.31973916 | 0.290412039 |

|           |             |            |             |
|-----------|-------------|------------|-------------|
| 204/18670 | 0.037480456 | 0.31993935 | 0.290593869 |
| 50/18670  | 0.038029531 | 0.31993935 | 0.290593869 |
| 50/18670  | 0.038029531 | 0.31993935 | 0.290593869 |
| 50/18670  | 0.038029531 | 0.31993935 | 0.290593869 |
| 50/18670  | 0.038029531 | 0.31993935 | 0.290593869 |
| 205/18670 | 0.03805104  | 0.31993935 | 0.290593869 |
| 403/18670 | 0.03855553  | 0.32216722 | 0.292617393 |
| 121/18670 | 0.038837311 | 0.32216722 | 0.292617393 |
| 121/18670 | 0.038837311 | 0.32216722 | 0.292617393 |
| 121/18670 | 0.038837311 | 0.32216722 | 0.292617393 |
| 302/18670 | 0.039062118 | 0.32271626 | 0.293116073 |
| 207/18670 | 0.039207187 | 0.32271626 | 0.293116073 |
| 51/18670  | 0.039425692 | 0.32271626 | 0.293116073 |
| 51/18670  | 0.039425692 | 0.32271626 | 0.293116073 |
| 208/18670 | 0.039792754 | 0.32464584 | 0.294868664 |
| 52/18670  | 0.040841134 | 0.3321029  | 0.301641753 |
| 210/18670 | 0.040978881 | 0.33213047 | 0.30166679  |
| 124/18670 | 0.041280264 | 0.33297807 | 0.302436649 |
| 410/18670 | 0.041352859 | 0.33297807 | 0.302436649 |
| 125/18670 | 0.042111489 | 0.33388246 | 0.303258081 |
| 125/18670 | 0.042111489 | 0.33388246 | 0.303258081 |
| 53/18670  | 0.04227557  | 0.33388246 | 0.303258081 |
| 53/18670  | 0.04227557  | 0.33388246 | 0.303258081 |
| 53/18670  | 0.04227557  | 0.33388246 | 0.303258081 |
| 53/18670  | 0.04227557  | 0.33388246 | 0.303258081 |
| 310/18670 | 0.042897644 | 0.33664206 | 0.305764572 |
| 214/18670 | 0.043411112 | 0.33664206 | 0.305764572 |
| 54/18670  | 0.043728717 | 0.33664206 | 0.305764572 |
| 54/18670  | 0.043728717 | 0.33664206 | 0.305764572 |
| 54/18670  | 0.043728717 | 0.33664206 | 0.305764572 |
| 54/18670  | 0.043728717 | 0.33664206 | 0.305764572 |
| 54/18670  | 0.043728717 | 0.33664206 | 0.305764572 |
| 127/18670 | 0.043799156 | 0.33664206 | 0.305764572 |
| 416/18670 | 0.043850625 | 0.33664206 | 0.305764572 |
| 55/18670  | 0.045200295 | 0.34536937 | 0.313691395 |
| 217/18670 | 0.045287757 | 0.34536937 | 0.313691395 |
| 315/18670 | 0.045406572 | 0.34536937 | 0.313691395 |
| 218/18670 | 0.045923294 | 0.34822817 | 0.316287974 |
| 422/18670 | 0.046441545 | 0.35108103 | 0.318879172 |
| 56/18670  | 0.046690026 | 0.35188337 | 0.319607913 |
| 131/18670 | 0.04727465  | 0.35326829 | 0.320865804 |
| 132/18670 | 0.048164235 | 0.35326829 | 0.320865804 |
| 132/18670 | 0.048164235 | 0.35326829 | 0.320865804 |
| 321/18670 | 0.048531311 | 0.35326829 | 0.320865804 |
| 428/18670 | 0.049126274 | 0.35326829 | 0.320865804 |
| 429/18670 | 0.04958289  | 0.35326829 | 0.320865804 |
| 429/18670 | 0.04958289  | 0.35326829 | 0.320865804 |
| 58/18670  | 0.049722849 | 0.35326829 | 0.320865804 |
| 58/18670  | 0.049722849 | 0.35326829 | 0.320865804 |
| 58/18670  | 0.049722849 | 0.35326829 | 0.320865804 |
| 58/18670  | 0.049722849 | 0.35326829 | 0.320865804 |
| 73/19717  | 0.010263768 | 0.61608393 | 0.616083928 |
| 403/19717 | 0.012218935 | 0.61608393 | 0.616083928 |
| 285/19717 | 0.031264323 | 0.61608393 | 0.616083928 |
| 393/19717 | 0.034330355 | 0.61608393 | 0.616083928 |
| 298/19717 | 0.036796429 | 0.61608393 | 0.616083928 |
| 119/19717 | 0.036934401 | 0.61608393 | 0.616083928 |
| 13/17697  | 0.003115956 | 0.30346866 | 0.287046711 |

|           |             |            |             |
|-----------|-------------|------------|-------------|
| 15/17697  | 0.004159119 | 0.30346866 | 0.287046711 |
| 237/17697 | 0.004531439 | 0.30346866 | 0.287046711 |
| 16/17697  | 0.004733173 | 0.30346866 | 0.287046711 |
| 242/17697 | 0.005011026 | 0.30346866 | 0.287046711 |
| 17/17697  | 0.005341584 | 0.30346866 | 0.287046711 |
| 18/17697  | 0.005983889 | 0.30346866 | 0.287046711 |
| 439/17697 | 0.007912752 | 0.35112839 | 0.332127369 |
| 24/17697  | 0.010524134 | 0.35874602 | 0.339332784 |
| 291/17697 | 0.011875897 | 0.35874602 | 0.339332784 |
| 211/17697 | 0.01225087  | 0.35874602 | 0.339332784 |
| 28/17697  | 0.014172438 | 0.35874602 | 0.339332784 |
| 144/17697 | 0.014496733 | 0.35874602 | 0.339332784 |
| 29/17697  | 0.015158283 | 0.35874602 | 0.339332784 |
| 29/17697  | 0.015158283 | 0.35874602 | 0.339332784 |
| 85/17697  | 0.017954195 | 0.37559078 | 0.355266003 |
| 32/17697  | 0.018286262 | 0.37559078 | 0.355266003 |
| 92/17697  | 0.022097957 | 0.37559078 | 0.355266003 |
| 36/17697  | 0.022839648 | 0.37559078 | 0.355266003 |
| 37/17697  | 0.024043731 | 0.37559078 | 0.355266003 |
| 438/17697 | 0.024244027 | 0.37559078 | 0.355266003 |
| 362/17697 | 0.030845976 | 0.37559078 | 0.355266003 |
| 43/17697  | 0.031791273 | 0.37559078 | 0.355266003 |
| 44/17697  | 0.033166278 | 0.37559078 | 0.355266003 |
| 46/17697  | 0.035984847 | 0.37559078 | 0.355266003 |
| 48/17697  | 0.038892509 | 0.37559078 | 0.355266003 |
| 48/17697  | 0.038892509 | 0.37559078 | 0.355266003 |
| 118/17697 | 0.041655975 | 0.37559078 | 0.355266003 |
| 50/17697  | 0.041886525 | 0.37559078 | 0.355266003 |
| 394/17697 | 0.043678784 | 0.37559078 | 0.355266003 |
| 394/17697 | 0.043678784 | 0.37559078 | 0.355266003 |
| 52/17697  | 0.044964214 | 0.37559078 | 0.355266003 |
| 52/17697  | 0.044964214 | 0.37559078 | 0.355266003 |
| 52/17697  | 0.044964214 | 0.37559078 | 0.355266003 |
| 207/17697 | 0.046137177 | 0.37559078 | 0.355266003 |
| 55/17697  | 0.049731894 | 0.37559078 | 0.355266003 |



| geneID                                                       | Count |
|--------------------------------------------------------------|-------|
| RGS17/PPARGC1A/PDE2A/ABAT/SDK1/EGR1/SLC8A1/CYP2C18/SRD5A1    | 9     |
| IL6/MYC/SLC31A1/PPARGC1A/PDE2A/EGR1/NR4A3/CD69/SLC8A1/SRD5A1 | 10    |
| THY1/ALOX15/FGA                                              | 3     |
| PPARGC1A/EGR1/SRD5A1                                         | 3     |
| DUOX2/PPARGC1A/PDE2A/FOS/SLC8A1/SRD5A1                       | 6     |
| DUOX2/PDE2A/FOS/SLC8A1/SRD5A1                                | 5     |
| THY1/ALOX15/FGA                                              | 3     |
| SERPINF2/PDE2A/CRP/SLC8A1/ADRA2B/FGA                         | 6     |
| MYC/MAP2K1/ALOX15/ATF3/SERPINF2/BMPER/C1QL4/FGA              | 8     |
| MYC/DACH1/C1QL4                                              | 3     |
| PPARGC1A/PDE2A/EGR1/SLC8A1/CYP2C18/SRD5A1                    | 6     |
| IL6/SERPINF2/EHD3/ABAT/CD177/ADRA2B/PRKCB/FGA                | 8     |
| IL6/SERPINF2/EHD3/ABAT/CD177/ADRA2B/PRKCB/FGA                | 8     |
| IL6/SERPINF2/EHD3/ABAT/CD177/ADRA2B/PRKCB/FGA                | 8     |
| DUOX2/CD177/CRP                                              | 3     |
| DUOX2/PDE2A/FOS/SLC8A1/SRD5A1                                | 5     |
| SRD5A1/RNF180                                                | 2     |
| NFAM1/PRKCB                                                  | 2     |
| ABAT/ADRA2B                                                  | 2     |
| PPARGC1A/SLC8A1                                              | 2     |
| MYC/EGR1                                                     | 2     |
| PPARGC1A/NR4A3/SRD5A1                                        | 3     |
| PPARGC1A/NR4A3/SRD5A1                                        | 3     |
| PPARGC1A/EGR1/SRD5A1                                         | 3     |
| CRP/SLC8A1/ADRA2B/FGA                                        | 4     |
| SERPINF2/CRP/SLC8A1/ADRA2B/FGA                               | 5     |
| SERPINF2/CRP/SLC8A1/ADRA2B/FGA                               | 5     |
| SERPINF2/CRP/SLC8A1/ADRA2B/FGA                               | 5     |
| DUOX2/PPARGC1A/EGR1/SRD5A1                                   | 4     |
| EN1/ABAT/SDK1/NR4A3/RNF180                                   | 5     |
| SERPINF2/CRP/SLC8A1/ADRA2B/FGA                               | 5     |
| PPARGC1A/EGR1                                                | 2     |
| ABAT/ADRA2B                                                  | 2     |
| IL6/SOX4/SYT2/ABAT/GLUD1/ADRA2B/PRKCB/FGA/SYP                | 9     |
| IL6/ABAT/ADRA2B/PRKCB/FGA                                    | 5     |
| MAP2K1/ALOX15/ATF3/SERPINF2/BMPER/C1QL4/FGA                  | 7     |
| MAP2K1/THY1/PLXNC1/PTPRD/FGA/TRPC5/SEMA6D                    | 7     |
| MAP2K1/PLXNC1/PTPRD/FGA/TRPC5                                | 5     |
| PPARGC1A/SLC8A1                                              | 2     |
| SRD5A1/RNF180                                                | 2     |
| SOX4/ABAT/GLUD1/FGA                                          | 4     |
| KHK/SOX4/PPARGC1A/EGR1/SLC8A1/PRKCB                          | 6     |
| IL6/SERPINF2/CRP                                             | 3     |
| MAP2K1/THY1/SYT2/PLXNC1/RND1/PTPRD/FGA/TRPC5/SEMA6D          | 9     |
| PDE2A/PDE11A                                                 | 2     |
| MYC/EGR1                                                     | 2     |
| MYC/EGR1                                                     | 2     |
| EN1/DACH1/NR4A3/FOS                                          | 4     |
| IL6/SERPINF2/PPARGC1A/NR4A3                                  | 4     |
| MAP2K1/EN1/PPARGC1A/ABAT                                     | 4     |
| MAP2K1/THY1/SYT2/PACSIN1/PLXNC1/PTPRD/SDK1/TRPC5/SEMA6D      | 9     |
| PPARGC1A/EGR1                                                | 2     |
| ABAT/ADRA2B                                                  | 2     |
| IL6/EGR1                                                     | 2     |
| PPARGC1A/NR4A3                                               | 2     |
| MAP2K1/EHD3                                                  | 2     |

|                                                     |   |
|-----------------------------------------------------|---|
| SOX6/ATF3/PPARGC1A/VGLL2/EGR1/FOS/SLC8A1/PIM1       | 8 |
| THY1/CD177/ITGA9/ANGPTL3                            | 4 |
| DUOX2/ABAT/SRD5A1/RNF180                            | 4 |
| IL6/MMP11/C1QL4                                     | 3 |
| SERPINF2/ABAT/FGA                                   | 3 |
| PDE2A/SLC8A1/SRD5A1                                 | 3 |
| PPARGC1A/EGR1                                       | 2 |
| PPARGC1A/SRD5A1                                     | 2 |
| IL6/EGR1                                            | 2 |
| IL6/EGR1                                            | 2 |
| PPARGC1A/SRD5A1                                     | 2 |
| IL6/DUOX2/SLC31A1/PPARGC1A/EGR1/NR4A3               | 6 |
| SERPINF2/ABAT/FGA                                   | 3 |
| PPARGC1A/SLC8A1                                     | 2 |
| PPARGC1A/SLC8A1                                     | 2 |
| MAP2K1/EN1/PPARGC1A/ABAT                            | 4 |
| MYC/EGR1/DCUN1D3                                    | 3 |
| SYT2/PACSIN1/SYP                                    | 3 |
| SYT2/PACSIN1/SYP                                    | 3 |
| IL6/THY1/ALOX15/SERPINF2/NR4A3/FGA                  | 6 |
| MAP2K1/DUOX2/SERPINF2/ABAT/FGA                      | 5 |
| CHEK1/ATF3/PDE2A/SLC38A2/FOS/PIM1/SRD5A1            | 7 |
| PPARGC1A/ABAT/SDK1/SLC8A1                           | 4 |
| SERPINF2/ABAT/FGA                                   | 3 |
| PPARGC1A/EHD3/ABAT/NR4A3/SLC8A1/ADRA2B              | 6 |
| FOS/SLC8A1                                          | 2 |
| MAP2K1/THY1/PLXNC1/TRPC5/SEMA6D                     | 5 |
| CHEK1/SOX4/PPARGC1A                                 | 3 |
| IL6/CRP                                             | 2 |
| CD177/CRP                                           | 2 |
| SATB1/NR4A3                                         | 2 |
| IL6/SOX4/EGR1/SATB1/NFAM1/KLF6/ATP11C               | 7 |
| THY1/ALOX15/FGA                                     | 3 |
| SYT2/ABAT/PRIMA1/PRKCB/SRD5A1/SYP/RNF180            | 7 |
| SYT2/ABAT/ADRA2B                                    | 3 |
| ABAT/SDK1                                           | 2 |
| SYT2/ABAT/ADRA2B                                    | 3 |
| ABAT/PRIMA1                                         | 2 |
| MYC/EGR1                                            | 2 |
| KHK/ALOX15/SYT2/PPARGC1A/ABAT/FOS/FGA               | 7 |
| KHK/SOX4/PPARGC1A/EGR1/SLC8A1                       | 5 |
| THY1/NFAM1/PRKCB                                    | 3 |
| CHEK1/MAP2K1/PRKCB/TRPC5                            | 4 |
| IL6/ADAMTSL2/SERPINF2/OLFML2A/MMP11/ITGA9/FGA       | 7 |
| IL6/MAP2K1/SOX4/SRD5A1                              | 4 |
| MAP2K1/SYT2/PACSIN1/PLXNC1/PTPRD/TRPC5              | 6 |
| CD177/CRP                                           | 2 |
| MAP2K1/SYT2/PACSIN1/PLXNC1/PTPRD/ADRA2B/TRPC5       | 7 |
| KHK/SOX4/PPARGC1A/EGR1/SLC8A1                       | 5 |
| PPARGC1A/EGR1/CYP2C18/SRD5A1                        | 4 |
| MAP2K1/THY1/PLXNC1/SLITRK4/DCLK1/NR4A3/TRPC5/SEMA6D | 8 |
| IL6/CRP/ANGPTL3                                     | 3 |
| ATF3/EGR1/FOS                                       | 3 |
| HOXD13/SRD5A1                                       | 2 |
| MYC/EGR1                                            | 2 |
| SOX4/ABAT/GLUD1/FGA                                 | 4 |
| SYT2/PACSIN1/SYP                                    | 3 |
| IL6/MAP2K1/SYT2/PACSIN1/PLXNC1/PTPRD/ADRA2B/TRPC5   | 8 |

|                                                   |   |
|---------------------------------------------------|---|
| KHK/SOX4/PPARGC1A/EGR1/SLC8A1                     | 5 |
| ANGPT4/MYC/PPARGC1A/EGR1/SLC8A1                   | 5 |
| PPARGC1A/DCLK1/MFSD2A/SLC38A2/NR4A3/SLC8A1/SRD5A1 | 7 |
| CHEK1/MAP2K1/PRKCB/TRPC5                          | 4 |
| PPARGC1A/SRD5A1                                   | 2 |
| SRD5A1/RNF180                                     | 2 |
| NFAM1/PRKCB                                       | 2 |
| MAP2K1/TAPT1/SYT2/PACSIN1/PLXNC1/PTPRD/TRPC5      | 7 |
| CHEK1/PDE2A/SLC38A2/FOS/SLC8A1                    | 5 |
| SOX4/ABAT/GLUD1                                   | 3 |
| SLC8A1/ADRA2B                                     | 2 |
| SERPINF2/FGA                                      | 2 |
| PDE2A/PDE11A                                      | 2 |
| DUOX2/CD177/CRP                                   | 3 |
| CHEK1/SOX4/PPARGC1A                               | 3 |
| SOX6/ATF3/VGLL2/EGR1/FOS/SLC8A1/PIM1              | 7 |
| MAP2K1/ALOX15/SERPINF2/BMPER/FGA                  | 5 |
| SYT2/CD177/PRKCB/FGA/SYP                          | 5 |
| ANGPT4/MYC/PPARGC1A/EGR1/SLC8A1                   | 5 |
| PPARGC1A/EGR1                                     | 2 |
| NR4A3/MCL1                                        | 2 |
| SLC38A4/SLC38A2/SLC4A4/SLC8A1/SGK1                | 5 |
| SLC8A1/ADRA2B/FGA                                 | 3 |
| SERPINF2/ABAT/FGA                                 | 3 |
| FOS/SLC8A1                                        | 2 |
| NR4A3/MCL1                                        | 2 |
| PPARGC1A/EGR1                                     | 2 |
| ABAT/ADRA2B                                       | 2 |
| SYT2/ABAT/ADRA2B                                  | 3 |
| IL6/PPARGC1A/MMP11/NR4A3/C1QL4                    | 5 |
| IL6/THY1/ALOX15/SERPINF2/ABAT/NR4A3/FGA           | 7 |
| IL6/SOX4/ABAT/GLUD1/ADRA2B/FGA                    | 6 |
| PPARGC1A/SRD5A1                                   | 2 |
| PPARGC1A/SRD5A1                                   | 2 |
| SERPINF2/FGA                                      | 2 |
| NFAM1/ATP11C                                      | 2 |
| SERPINF2/ABAT/FGA                                 | 3 |
| CHEK1/PDE2A/SLC38A2                               | 3 |
| EN1/PPARGC1A/EGR1/NR4A3/FOS/MCL1                  | 6 |
| SERPINF2/ABAT/FGA                                 | 3 |
| EN1/FREM2/SOX4/HOXD13                             | 4 |
| EN1/FREM2/SOX4/HOXD13                             | 4 |
| ALOX15/SYT2/FOS/FGA                               | 4 |
| DUOX2/SERPINF2/ABAT/FGA                           | 4 |
| PACSIN1/PTPRD/SDK1/TRPC5                          | 4 |
| NFAM1/PRKCB                                       | 2 |
| DCLK1/PKIA                                        | 2 |
| MFSD2A/NR4A3/SRD5A1                               | 3 |
| IL6/SOX6/MAP2K1                                   | 3 |
| ANGPT4/BMPER/EGR1/PRKCB/ANGPTL3                   | 5 |
| IL6/PPARGC1A/NR4A3/FOS/SLC8A1                     | 5 |
| DUOX2/PPARGC1A/EGR1/CYP2C18/SRD5A1                | 5 |
| MAP2K1/EN1/PPARGC1A/ABAT                          | 4 |
| PPARGC1A/NR4A3                                    | 2 |
| MYC/DACH1/C1QL4                                   | 3 |
| ALOX15/SYT2/FOS                                   | 3 |
| PACSIN1/PTPRD/DCLK1/SDK1/TRPC5                    | 5 |
| IL6/SOX4/ABAT/GLUD1/ADRA2B/FGA                    | 6 |

|                                               |   |
|-----------------------------------------------|---|
| ABAT/PRIMA1/SRD5A1/RNF180                     | 4 |
| ANGPT4/MYC/PPARGC1A/EGR1/SLC8A1               | 5 |
| PPARGC1A/NR4A3/SEMA6D                         | 3 |
| MYC/DACH1/C1QL4                               | 3 |
| SERPINF2/ABAT/FGA                             | 3 |
| SYT2/HOXD13/DCLK1/TRPC5/SEMA6D                | 5 |
| FOS/SRD5A1                                    | 2 |
| MAP2K1/PLXNC1/TRPC5                           | 3 |
| IL6/ADAMTSL2/SERPINF2/OLFML2A/MMP11/ITGA9/FGA | 7 |
| IL6/ABAT/EGR1/NR4A3/SLC8A1/SRD5A1             | 6 |
| IL6/SERPINF2/PPARGC1A/NR4A3/PIM1              | 5 |
| MYC/SOX4/HOXD13/BMPER/EGR1/SRD5A1             | 6 |
| IL6/THY1/TAPT1/CRP/SLC8A1/ANGPTL3             | 6 |
| ABAT/ADRA2B                                   | 2 |
| MAP2K1/THY1                                   | 2 |
| MYC/CHEK1/PDE2A/EGR1/EFHD1/SLC38A2            | 6 |
| MYC/CHEK1/PDE2A/EGR1/EFHD1/SLC38A2            | 6 |
| IL6/PPARGC1A/FGA                              | 3 |
| ATF3/VGLL2/EGR1/FOS                           | 4 |
| SYT2/CD177/PRKCB/SYP                          | 4 |
| ANGPT4/THY1/DACH1/MCC/PPARGC1A/SEMA6D         | 6 |
| IL6/PPARGC1A/NFAM1/FOS/SGK1/PIM1/PRKCB        | 7 |
| PDE2A/PDE11A                                  | 2 |
| SOX6/TAPT1                                    | 2 |
| SOX4/PPARGC1A                                 | 2 |
| ABAT/NR4A3                                    | 2 |
| SYT2/ABAT/ADRA2B                              | 3 |
| SERPINF2/ABAT/FGA                             | 3 |
| NR4A3/SRD5A1                                  | 2 |
| NR4A3/SRD5A1                                  | 2 |
| PPARGC1A/NR4A3                                | 2 |
| PPARGC1A/NR4A3/SEMA6D                         | 3 |
| SOX6/ADAMTSL2/PPARGC1A/PDE2A/FOS              | 5 |
| THY1/PPARGC1A/EHD3/DPP6/KCNS2/SLC8A1          | 6 |
| IL6/SOX4/ABAT/GLUD1/FGA                       | 5 |
| PPARGC1A/SLC8A1                               | 2 |
| MFSD2A/SLC38A2/NR4A3/SLC8A1/SRD5A1            | 5 |
| SYT2/DCLK1/TRPC5/SEMA6D                       | 4 |
| EGR1/FOS/MCL1                                 | 3 |
| IL6/SERPINF2/PPARGC1A/NR4A3                   | 4 |
| ATF3/VGLL2/EGR1/FOS                           | 4 |
| PRKCB/CISH                                    | 2 |
| MAP2K1/ADAMTSL2                               | 2 |
| PPARGC1A/SRD5A1                               | 2 |
| CD177/CRP                                     | 2 |
| EN1/PPARGC1A/EGR1/NR4A3/FOS/MCL1              | 6 |
| SOX6/ADAMTSL2/PPARGC1A/PDE2A/FOS              | 5 |
| SYT2/ABAT/ADRA2B                              | 3 |
| ANGPT4/THY1/DACH1/MCC/PPARGC1A/SEMA6D         | 6 |
| EHD3/ABAT/SLC8A1/ADRA2B                       | 4 |
| IL6/SERPINF2/PPARGC1A/NR4A3                   | 4 |
| SLC31A1/EGR1/SRD5A1                           | 3 |
| IL6/DUOX2/PPARGC1A/NR4A3/FOS/SLC8A1/MCL1      | 7 |
| PPARGC1A/SEMA6D                               | 2 |
| PPARGC1A/NR4A3                                | 2 |
| MFSD2A/SLC38A2/NR4A3/SRD5A1                   | 4 |
| THY1/TRPC5/SEMA6D                             | 3 |
| CHEK1/PRKCB                                   | 2 |

|                                                    |   |
|----------------------------------------------------|---|
| PPARGC1A/EGR1                                      | 2 |
| PRKCB/CISH                                         | 2 |
| IL6/PPARGC1A                                       | 2 |
| ANGPT4/MYC/PPARGC1A/ABAT/EGR1/SLC8A1               | 6 |
| SOX4/PDE2A/ANGPTL3                                 | 3 |
| SYT2/ABAT/NR4A3                                    | 3 |
| HOXD13/SRD5A1                                      | 2 |
| SOX4/PPARGC1A/A1CF/PIM1                            | 4 |
| SOX4/ABAT/GLUD1/ADRA2B/FGA                         | 5 |
| EN1/FREM2/SOX4/HOXD13                              | 4 |
| EN1/FREM2/SOX4/HOXD13                              | 4 |
| SYT2/ABAT/ADRA2B                                   | 3 |
| ATF3/SLC38A2/FOS/PIM1/SRD5A1                       | 5 |
| IL6/SOX4/ABAT/GLUD1/FGA                            | 5 |
| SYT2/ABAT                                          | 2 |
| SYT2/ABAT                                          | 2 |
| PLXNC1/SEMA6D                                      | 2 |
| MYC/EGR1                                           | 2 |
| SERPINF2/ABAT/SGK1/ADRA2B                          | 4 |
| PPARGC1A/NR4A3/SEMA6D                              | 3 |
| KHK/EGR1/PRKCB/SRD5A1/CISH                         | 5 |
| ANGPT4/MYC/PPARGC1A/ABAT/EGR1/SLC8A1               | 6 |
| PPARGC1A/EGR1                                      | 2 |
| MYC/NFAM1/NR4A3/FOS/ATP11C/PIM1/PRKCB              | 7 |
| ATF3/SLC38A2                                       | 2 |
| SOX4/PPARGC1A                                      | 2 |
| SYT2/ABAT/SLC38A2                                  | 3 |
| ABAT/MFSD2A/SLC38A4/SLC22A11/SLC38A2/SLC4A4/ATP11C | 7 |
| MFSD2A/NR4A3/SRD5A1                                | 3 |
| THY1/PPARGC1A/EHD3/DPP6/KCNS2/SLC8A1/KCNK17        | 7 |
| ALOX15/SYT2/PPARGC1A/FOS                           | 4 |
| IL6/SERPINF2                                       | 2 |
| CDH10/SERPINF2                                     | 2 |
| SYT2/DCLK1/DCUN1D3/SGK1/CISH/TRPC5/SEMA6D          | 7 |
| ATF3/PPARGC1A/SLC38A2/SRD5A1                       | 4 |
| ABAT/SLC8A1/ADRA2B                                 | 3 |
| ALOX15/PPARGC1A/NR4A3/MMAA/CYP2C18/ANGPTL3         | 6 |
| IL6/PPARGC1A/FGA                                   | 3 |
| IL6/SOX4                                           | 2 |
| ANGPT4/THY1/DACH1/MCC/PPARGC1A/SEMA6D              | 6 |
| SYT2/PRKCB/SYP                                     | 3 |
| SYT2/PACSIN1/PRKCB/SYP                             | 4 |
| IL6/CRP                                            | 2 |
| EGR1/SRD5A1                                        | 2 |
| IL6/PPARGC1A                                       | 2 |
| ATF3/SLC38A2                                       | 2 |
| IL6/SOX4/ABAT/GLUD1/FGA                            | 5 |
| EGR1/SRD5A1                                        | 2 |
| NR4A3/SEMA6D                                       | 2 |
| HOXD13/SRD5A1                                      | 2 |
| IL6/SERPINF2/MMP11                                 | 3 |
| ANGPT4/MYC/PPARGC1A/ABAT/EGR1/SLC8A1               | 6 |
| ABAT/ADRA2B                                        | 2 |
| ANGPT4/THY1/DACH1/MCC/PPARGC1A/SEMA6D              | 6 |
| IL6/SERPINF2                                       | 2 |
| THY1/SDK1                                          | 2 |
| IL6/SOX4/ABAT/GLUD1/CD177/FGA                      | 6 |
| SYT2/PRKCB/SYP                                     | 3 |

|                                             |   |
|---------------------------------------------|---|
| ANGPT4/BMPER/PRKCB/ANGPTL3                  | 4 |
| PPARGC1A/EGR1                               | 2 |
| PPARGC1A/FOS                                | 2 |
| IL6/SOX4                                    | 2 |
| IL6/PPARGC1A                                | 2 |
| ABAT/MFSD2A/SRD5A1/RNF180                   | 4 |
| IL6/THY1/ALOX15/SERPINF2/NR4A3/FGA          | 6 |
| THY1/ALOX15/FGA                             | 3 |
| CHEK1/ATF3/EGR1                             | 3 |
| DCLK1/TRPC5/SEMA6D                          | 3 |
| IL6/PPARGC1A/NR4A3/FOS/MCL1                 | 5 |
| SYT2/PACSIN1/PRKCB/SYP                      | 4 |
| ALOX15/CYP2C18                              | 2 |
| PDE2A/PDE11A                                | 2 |
| SOX4/ABAT/GLUD1/FGA                         | 4 |
| SYT2/ABAT                                   | 2 |
| EN1/PPARGC1A/NR4A3/MCL1                     | 4 |
| ABAT/SLC38A2/SGK1                           | 3 |
| SOX6/ATF3/VGLL2/EGR1/FOS/PIM1               | 6 |
| EN1/FREM2/HOXD13                            | 3 |
| EN1/FREM2/HOXD13                            | 3 |
| RAD54B/PRDM9                                | 2 |
| SERPINF2/FGA                                | 2 |
| IL6/SERPINF2                                | 2 |
| CHEK1/PPARGC1A                              | 2 |
| IL6/NFAM1/KLF6/ATP11C/PRKCB                 | 5 |
| MYC/SLC31A1/SYT2/ABAT                       | 4 |
| IL6/NR4A3                                   | 2 |
| ABAT/RNF180                                 | 2 |
| ABAT/RNF180                                 | 2 |
| SERPINF2/MMP11                              | 2 |
| RAD54B/PRDM9                                | 2 |
| CHEK1/ATF3/EGR1                             | 3 |
| SYT2/DCUN1D3/SGK1/CISH/TRPC5/SEMA6D         | 6 |
| ABAT/SDK1                                   | 2 |
| ALOX15/SYT2/PPARGC1A/FOS                    | 4 |
| THY1/EHD3/PDE2A/SLC8A1/TRPC5                | 5 |
| IL6/SOX6/MAP2K1/SOX4                        | 4 |
| IL6/ANGPT4/BMPER/EGR1/PRKCB/ANGPTL3         | 6 |
| MYC/EGR1                                    | 2 |
| NFAM1/KLF6/ATP11C                           | 3 |
| IL6/MMP11/C1QL4                             | 3 |
| ABAT/MMAA/LDHD                              | 3 |
| CHEK1/MAP2K1/PPARGC1A/ABAT/FOS              | 5 |
| IL6/SOX4/ABAT/GLUD1/CD177/FGA               | 6 |
| MYC/THY1/ATF3/PPARGC1A/C1QL4/PKIA           | 6 |
| IL6/MYC/CHEK1/DACH1/PPARGC1A/PRDM9          | 6 |
| ADRA2B/FGA                                  | 2 |
| IL6/EGR1                                    | 2 |
| SOX4/PDE2A                                  | 2 |
| ATF3/FGA                                    | 2 |
| FCAR/CD177/SIGLEC14                         | 3 |
| DUOX2/THY1/PACSIN1/MCC/FRMD4B/CD177/ANGPTL3 | 7 |
| THY1/PACSIN1/PRKCB/TRPC5/SYP                | 5 |
| THY1/LIFR/SLC22A11/FCGR3A/CD69/FGA          | 6 |
| SYT2/FCAR/NFAM1/CD177/SIGLEC14              | 5 |
| PACSIN1/PRKCB/SYP                           | 3 |
| SLC22A11/SLC4A4                             | 2 |

|                                                |   |
|------------------------------------------------|---|
| PDE2A/PDE11A                                   | 2 |
| MFSD2A/SLC38A4/SLC22A11/SLC38A2/SLC4A4/SLC8A1  | 6 |
| GRHPR/SRD5A1                                   | 2 |
| MYC/SOX6/EN1/DACH1/ATF3/SATB1                  | 6 |
| CHEK1/PRKCB                                    | 2 |
| PDE2A/PDE11A                                   | 2 |
| MYC/SOX4/ATF3/HOXD13/EGR1/KLF6/NR4A3/FOS       | 8 |
| FCAR/FCGR3A                                    | 2 |
| GRHPR/ABAT/GLUD1/PANK1/LDHD/SRD5A1             | 6 |
| MFSD2A/SLC38A4/SLC22A11/SLC38A2/SLC4A4         | 5 |
| PDE2A/PDE11A                                   | 2 |
| MFSD2A/SLC38A4/SLC38A2/SLC4A4                  | 4 |
| PDE2A/PDE11A                                   | 2 |
| EGR1/NR4A3                                     | 2 |
| SYT2/TRPC5/SYP                                 | 3 |
| DCUN1D3/RNF180                                 | 2 |
| PPARGC1A/NR4A3/PRKCB                           | 3 |
| PDE2A/PDE11A                                   | 2 |
| DCUN1D3/RNF180                                 | 2 |
| SLC31A1/PDE2A/KCNS2/SLC4A4/SLC8A1/KCNK17/TRPC5 | 7 |
| MFSD2A/SLC38A4/SLC22A11/SLC38A2/SLC4A4/SLC8A1  | 6 |
| MAP2K1/SGK1                                    | 2 |
| PPARGC1A/PRKCB                                 | 2 |
| SYNPO2/TRPC5                                   | 2 |
| SGK1/PRKCB                                     | 2 |
| PPARGC1A/EGR1                                  | 2 |
| DPP6/SGK1/PRKCB                                | 3 |
| AKAP3/PKIA                                     | 2 |
| RND1/EHD3/PDE2A/GLUD1/PDE11A/MMAA              | 6 |
| RND1/EHD3/PDE2A/GLUD1/PDE11A/MMAA              | 6 |
| NDST3/SULT4A1                                  | 2 |
| DPP6/SGK1                                      | 2 |
| GRHPR/SRD5A1                                   | 2 |
| ANGPT4/MAP2K1/CISH/PKIA                        | 4 |
| MYC/FOS                                        | 2 |

Table S6. KEGG annotation of the target genes

| ID       | Description                                         | GeneRatio | BgRatio  |
|----------|-----------------------------------------------------|-----------|----------|
| hsa04630 | JAK-STAT signaling pathway                          | 6/58      | 162/8011 |
| hsa05020 | Prion diseases                                      | 3/58      | 35/8011  |
| hsa01521 | EGFR tyrosine kinase inhibitor resistance           | 4/58      | 79/8011  |
| hsa04371 | Apelin signaling pathway                            | 5/58      | 137/8011 |
| hsa04012 | ErbB signaling pathway                              | 4/58      | 85/8011  |
| hsa05166 | Human T-cell leukemia virus 1 infection             | 6/58      | 219/8011 |
| hsa04933 | AGE-RAGE signaling pathway in diabetic complication | 4/58      | 100/8011 |
| hsa05161 | Hepatitis B                                         | 5/58      | 162/8011 |
| hsa04928 | Parathyroid hormone synthesis, secretion and action | 4/58      | 106/8011 |
| hsa04066 | HIF-1 signaling pathway                             | 4/58      | 109/8011 |
| hsa04726 | Serotonergic synapse                                | 4/58      | 115/8011 |



| pvalue      | p.adjust    | qvalue      | geneID                            |
|-------------|-------------|-------------|-----------------------------------|
| 0.001058035 | 0.132181031 | 0.110491883 | IL6/MYC/LIFR/MCL1/PIM1/CISH       |
| 0.001999912 | 0.132181031 | 0.110491883 | IL6/MAP2K1/EGR1                   |
| 0.002482518 | 0.132181031 | 0.110491883 | IL6/MAP2K1/NRG2/PRKCB             |
| 0.003012289 | 0.132181031 | 0.110491883 | MAP2K1/PPARGC1A/EGR1/PLIN1/SLC8A1 |
| 0.003239731 | 0.132181031 | 0.110491883 | MYC/MAP2K1/NRG2/PRKCB             |
| 0.004821175 | 0.156656443 | 0.130951206 | IL6/MYC/CHEK1/MAP2K1/EGR1/FOS     |
| 0.005790819 | 0.156656443 | 0.130951206 | IL6/EGR1/PIM1/PRKCB               |
| 0.00614339  | 0.156656443 | 0.130951206 | IL6/MYC/MAP2K1/FOS/PRKCB          |
| 0.007105119 | 0.159746052 | 0.133533852 | MAP2K1/EGR1/FOS/PRKCB             |
| 0.007830689 | 0.159746052 | 0.133533852 | IL6/ANGPT4/MAP2K1/PRKCB           |
| 0.009424936 | 0.174789722 | 0.146109056 | MAP2K1/ALOX15/CYP2C18/PRKCB       |

Count

6  
3  
4  
5  
4  
6  
4  
5  
4  
4  
4

Table S7.Validation of the proportional hazard assumption of cox regression model

|           | chisq    | df | p        |
|-----------|----------|----|----------|
| age       | 2.003598 | 1  | 0.156926 |
| stage     | 0.275101 | 1  | 0.599931 |
| T         | 0.512572 | 1  | 0.474028 |
| M         | 4.825195 | 1  | 0.028047 |
| N         | 11.06468 | 1  | 0.00088  |
| riskScore | 1.209221 | 1  | 0.271486 |
| GLOBAL    | 14.50385 | 6  | 0.124487 |
